# Supplementary material for: A Method for Identification of Biotype-Specific Salivary Effector Candidates of Aphid
Source: MDPI journal article supplement (doi:10.3390/insects14090760), 2023-09-12
Supplement: s1 [file s1]

Table S1. Primers used in RT-qPCR for validation of differentially expressed genes (DEGs).

| Gene ID             | Forward primer (5'-3') | Reverse primer (5'-3') |
|---------------------|------------------------|------------------------|
| <i>LOC114121443</i> | TAAAACCGTCGGTACCACCC   | ACAACCAAAGGCGCAACATC   |
| <i>LOC114133090</i> | CAAAGTGGTGAACGACAGCG   | GTCACTTCACGGCCCAAGTA   |
| <i>LOC114132056</i> | CAGTGCGACCGAAACACATTA  | CGCAATAACGCACAATTCGATG |
| <i>LOC114122099</i> | GGAACGCGGGTAAACAGGAA   | CGAGAACCGGGGAAACCAC    |
| <i>LOC114128852</i> | TGCAGTTCATTGCCGTGTTG   | AGCCATGGTTCAAGAGTACGA  |
| <i>LOC114125817</i> | TTATCGACGACCAACTGCCC   | CAGTTCTGTGCCTGTTTCGC   |
| <i>LOC114129582</i> | AAACCATTTTCCTGCTCGGG   | GAGGTGCTGGTGGTACTCTA   |
| <i>LOC114130922</i> | TCGCGGTGATTAGGTGATCG   | TCGACGACGAGGCGTTAAAA   |
| <i>LOC114119891</i> | CGTGGTGTGCTGACAATCAA   | GCTACGAATCCGCGTGCATA   |
| <i>LOC114118907</i> | AGGGGCAATTTTCCGTGAAC   | CGTCAAACCTTCGCACATGGT  |
| <i>LOC114131096</i> | CGCCCATGCACCAGATTTTG   | TCTCGCAGTCGGTGATAGGA   |

---

*Ef1- $\alpha$*

TATGGTGGTTCAGTAGAGTC

CTGATTGTGCCGTGCTTATTG

---
