# Supplementary material for: A Method for Identification of Biotype-Specific Salivary Effector Candidates of Aphid
Source: MDPI journal article supplement (doi:10.3390/insects14090760), 2023-09-12
Supplement: s1 [file s1]

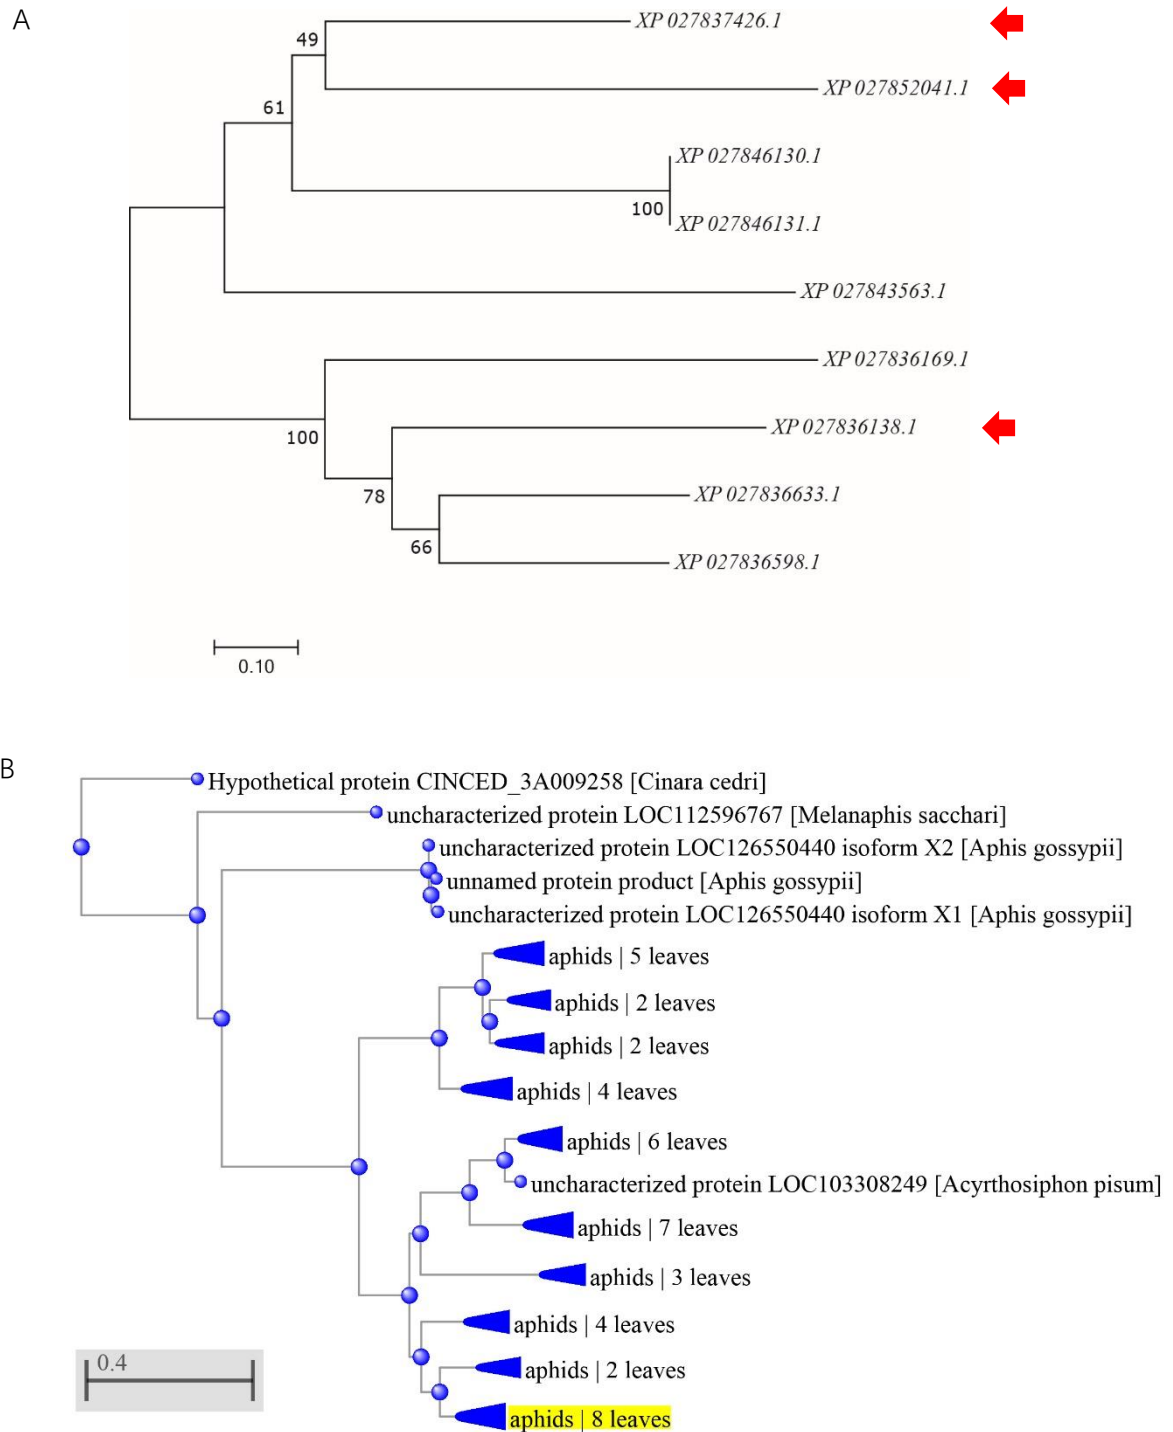

Figure S1. Phylogenetic analysis of effector candidates XP027837426.1. A, Neighbor joining tree of BLASTP hits of XP027837426.1 in *Aphis gossypii*, the red arrow indicates effector candidates identified in the study; B, Fast minimum evolution tree of the first 50 hits of XP027837426.1, XP027837426.1 was included in the yellow branch.
