# Supplementary material for: A Method for Identification of Biotype-Specific Salivary Effector Candidates of Aphid
Source: Insects. 2023 Sep 13;14(9):760. doi: 10.3390/insects14090760 (PMC10532216; doi:10.3390/insects14090760)
Supplement: Supplementary file 1 [file insects-14-00760-s001.zip]

Archive with 6 entries (6 files):
- Figure S1 Phylogenetic analysis of effector candidates XP027837426.1.pdf
- Table S1 Primers used in RT-qPCR for validation of DEGs.pdf
- Table S2 Biotype-specific effector candidates from whole-aphid transcriptome.xlsx
- Table S3 Biotype-specific effector candidates from aphid-head transcriptome.xlsx
- Table S4 Protein groups identified from aphid saliva by mass Spectrometry.xlsx
- Table S5 Biotype-specific protein groups identified by label-free quantification.xlsx
