# Supplementary material for: A Method for Identification of Biotype-Specific Salivary Effector Candidates of Aphid
Source: Insects. 2023 Sep 13;14(9):760. doi: 10.3390/insects14090760 (PMC10532216; doi:10.3390/insects14090760)
Supplement: Supplementary file 1 [file insects-14-00760-s001.zip › Table S2 Biotype-specific effector candidates from whole-aphid transcriptome.xlsx]

## Sheet: DEGs(765)
seq_id	Cu_vs_Ma	sum	gene_id	gene_name	description	length	Cu_1_count	Cu_2_count	Cu_3_count	Ma_1_count	Ma_2_count	Ma_3_count	Cu_1_tpm	Cu_2_tpm	Cu_3_tpm	Ma_1_tpm	Ma_2_tpm	Ma_3_tpm	Cu_tpm	Ma_tpm	fc	log2fc	pvalue	padjust	significant	regulate	nr	go	KO_id	KO_name	paths	cog	cog_description	pfam	swissprot	entrez
gene-LOC114121285	yes|down	1	gene-LOC114121285	LOC114121285	uncharacterized LOC114121285	935	174	330	266	101	65	76	13.73	25.67	19.92	8.3	5.43	5.93	19.7733	6.55333	0.400076	-1.32165	0.000142446	0.00266303	yes	down	XP_027839339.1(uncharacterized protein LOC114121285 [Aphis gossypii])	0	0	0	0	0	0	0	0	114121285
gene-LOC114125377	yes|down	1	gene-LOC114125377	LOC114125377	eukaryotic translation initiation factor 3 subunit A-like	1470	1691	2783	2374	517	408	362	72.96	118.83	97.56	23.29	18.71	15.54	96.45	19.18	0.240377	-2.05663	9.24e-14	1.44e-11	yes	down	XP_027844794.1(eukaryotic translation initiation factor 3 subunit A-like [Aphis gossypii])	0	0	0	0	0	0	0	0	114125377
gene-LOC114121343	yes|down	1	gene-LOC114121343	LOC114121343	chromosome transmission fidelity protein 8 homolog, transcript variant X1	691	324.33	319.04	453.72	75.3	120.14	92.94	34.18	31.67	43.56	8.04	15.13	10.15	36.47	11.1067	0.34302	-1.54363	3.22e-06	0.000109181	yes	down	XP_027839429.1(chromosome transmission fidelity protein 8 homolog [Aphis gossypii])	GO:0003689(molecular_function:DNA clamp loader activity); GO:0007064(biological_process:mitotic sister chromatid cohesion); GO:0017116(molecular_function:single-stranded DNA-dependent ATP-dependent DNA helicase activity); GO:1900264(biological_process:positive regulation of DNA-directed DNA polymerase activity); GO:0031390(cellular_component:Ctf18 RFC-like complex)	K11270	CTF8	0	ENOG4111SBI(S:Function unknown)	ENOG4111SBI(CTF8, chromosome transmission fidelity factor 8 homolog (S. cerevisiae))	PF09696.11(Ctf8:Ctf8)	sp|P0CG11|CTF8_BOVIN(Chromosome transmission fidelity protein 8 homolog OS=Bos taurus OX=9913 GN=CHTF8 PE=3 SV=1)	114121343
gene-LOC114121283	yes|up	1	gene-LOC114121283	LOC114121283	protein BRICK1	1265	331	288	350	582	527	568	17.28	14.87	17.39	31.7	29.21	29.46	16.5133	30.1233	2.24667	1.16779	4.49e-12	5.21e-10	yes	up	XP_026820478.1(protein BRICK1 isoform X1 [Rhopalosiphum maidis])	GO:0007015(biological_process:actin filament organization); GO:0044877(molecular_function:macromolecular complex binding); GO:0031209(cellular_component:SCAR complex)	K05752	C3ORF10, HSPC300	map05130(Pathogenic Escherichia coli infection); map04810(Regulation of actin cytoskeleton); map05132(Salmonella infection)	ENOG4111UHX(S:Function unknown)	ENOG4111UHX(BRICK1, SCAR WAVE actin-nucleating complex subunit)	PF10152.10(CCDC53:Subunit CCDC53 of WASH complex)	sp|Q6IQ86|BRK1_DANRE(Probable protein BRICK1 OS=Danio rerio OX=7955 GN=brk1 PE=3 SV=1)	114121283
gene-LOC114130925	yes|down	1	gene-LOC114130925	LOC114130925	U8 snoRNA-decapping enzyme-like	1108	350.11	415.29	550.3	113.08	136.86	220.55	21.79	25.52	32.55	7.34	9.03	13.61	26.62	9.99333	0.465291	-1.1038	0.00299354	0.0285218	yes	down	XP_027851816.1(uncharacterized protein LOC114130925 [Aphis gossypii])	GO:0016787(molecular_function:hydrolase activity); GO:0003677(molecular_function:DNA binding)	K16855	NUDT16	map03018(RNA degradation); map00230(Purine metabolism)	ENOG4111QA1(S:Function unknown)	ENOG4111QA1(XTP binding)	PF00293.29(NUDIX:NUDIX domain); PF05485.13(THAP:THAP domain)	sp|P0DKY8|NUD16_HOMVI(U8 snoRNA-decapping enzyme OS=Homalodisca vitripennis OX=197043 GN=NUDT16 PE=1 SV=1)	114130925
gene-LOC114132551	yes|down	1	gene-LOC114132551	LOC114132551	uncharacterized LOC114132551	1555	861.1	574.55	1397.03	72.66	60.16	128.61	40.39	25.19	55.5	5.28	5.68	6.4	40.36	5.78667	0.119489	-3.06505	4.77e-12	5.38e-10	yes	down	XP_027853840.1(uncharacterized protein LOC114132551 [Aphis gossypii])	GO:0016021(cellular_component:integral component of membrane); GO:0005576(cellular_component:extracellular region)	0	0	0	0	0	PF13930.7(Endonuclea_NS_2:DNA/RNA non-specific endonuclease); PF00030.20(Crystall:Beta/Gamma crystallin)	0	114132551
gene-LOC114132686	yes|up	1	gene-LOC114132686	LOC114132686	ataxin-8-like	643	13.32	16.27	19.59	33.1	31.91	35.04	1.92	2.29	2.66	4.94	4.83	4.94	2.29	4.90333	2.64078	1.40097	0.00111528	0.0133185	yes	up	0	0	0	0	0	0	0	0	0	114132686
gene-LOC114119989	yes|down	1	gene-LOC114119989	LOC114119989	farnesol dehydrogenase-like, transcript variant X1	1121	1426	1734.11	2242.06	26.27	16.26	57.04	78.17	93.17	118.96	1.35	0.44	2.91	96.7667	1.56667	0.0235945	-5.4054	2.1e-32	1.34e-29	yes	down	XP_027837547.1(farnesol dehydrogenase-like [Aphis gossypii])	GO:0016491(molecular_function:oxidoreductase activity)	K15890	FOHSDR	map00981(Insect hormone biosynthesis); map00900(Terpenoid backbone biosynthesis)	COG4221(S:Function unknown); COG1028(S:Function unknown)	COG4221(serine 3-dehydrogenase activity); COG1028(Dehydrogenase reductase)	PF00106.26(adh_short:short chain dehydrogenase); PF13561.7(adh_short_C2:Enoyl-(Acyl carrier protein) reductase); PF08659.11(KR:KR domain); PF01370.22(Epimerase:NAD dependent epimerase/dehydratase family)	sp|D2WKD9|SDR1_AEDAE(Farnesol dehydrogenase OS=Aedes aegypti OX=7159 GN=SDR-1 PE=1 SV=2)	114119989
gene-LOC114125378	yes|down	1	gene-LOC114125378	LOC114125378	uncharacterized LOC114125378	1405	1434	2478	2212	463	273	269	65.47	111.95	96.17	22.07	13.24	12.21	91.1967	15.84	0.207784	-2.26684	1.78e-12	2.24e-10	yes	down	XP_027844795.1(uncharacterized protein LOC114125378 [Aphis gossypii])	0	0	0	0	0	0	0	0	114125378
gene-LOC114127791	yes|down	1	gene-LOC114127791	LOC114127791	uncharacterized LOC114127791, transcript variant X1	674	22.13	8.5	21.86	0	0	0	2.79	1.05	2.73	0	0	0	2.19	0	0.0135912	-6.20118	2.04e-05	0.000533642	yes	down	XP_027847907.1(uncharacterized protein LOC114127781 [Aphis gossypii])	GO:0016021(cellular_component:integral component of membrane)	0	0	0	ENOG410Y3ZT(S:Function unknown)	ENOG410Y3ZT(-)	PF01683.19(EB:EB module)	0	114127791
gene-LOC114119141	yes|down	1	gene-LOC114119141	LOC114119141	myb-like protein D	2822	114	174	107	44	38	30	2.29	3.47	2.05	0.93	0.81	0.6	2.60333	0.78	0.365937	-1.45033	3.27e-05	0.00079778	yes	down	XP_027836424.1(myb-like protein D [Aphis gossypii])	0	0	0	0	0	0	0	0	114119141
gene-LOC114126702	yes|down	1	gene-LOC114126702	LOC114126702	uncharacterized LOC114126702	1260	83.8	176.95	124.83	12.7	18.69	6.55	2.51	5.47	3.71	0.44	0.57	0.17	3.89667	0.393333	0.130515	-2.93771	1.67e-08	1.01e-06	yes	down	XP_027846503.1(uncharacterized protein LOC114126702 [Aphis gossypii])	0	0	0	0	0	0	0	0	114126702
gene-LOC114123893	yes|up	1	gene-LOC114123893	LOC114123893	uncharacterized LOC114123893, transcript variant X2	1266	45	34	55	782	540	1314	2.44	1.83	2.84	44.31	31.14	70.89	2.37	48.78	25.5042	4.67266	7e-32	4.23e-29	yes	up	XP_027842828.1(uncharacterized protein LOC114123893 [Aphis gossypii])	0	0	0	0	0	0	0	0	114123893
gene-LOC114127653	yes|up	1	gene-LOC114127653	LOC114127653	UDP-glucuronosyltransferase 2B2-like	1214	0	0	0	18.02	3.94	20.44	0	0	0	1.04	0.23	1.12	0	0.796667	97.1314	6.60187	2.15e-05	0.000559406	yes	up	XP_027847754.1(UDP-glucuronosyltransferase 2B2-like [Aphis gossypii])	GO:0015020(molecular_function:glucuronosyltransferase activity); GO:0016021(cellular_component:integral component of membrane)	K00699	UGT	map05207(Chemical carcinogenesis - receptor activation); map05204(Chemical carcinogenesis - DNA adducts); map00983(Drug metabolism - other enzymes); map00982(Drug metabolism - cytochrome P450); map01240(Biosynthesis of cofactors); map04976(Bile secretion); map00040(Pentose and glucuronate interconversions); map00980(Metabolism of xenobiotics by cytochrome P450); map00860(Porphyrin and chlorophyll…	COG1819(S:Function unknown)	COG1819(Transferase)	PF00201.19(UDPGT:UDP-glucoronosyl and UDP-glucosyl transferase); PF04101.17(Glyco_tran_28_C:Glycosyltransferase family 28 C-terminal domain)	sp|P08541|UD2B2_RAT(UDP-glucuronosyltransferase 2B2 OS=Rattus norvegicus OX=10116 GN=Ugt2b PE=1 SV=1)	114127653
gene-LOC114123896	yes|up	1	gene-LOC114123896	LOC114123896	uncharacterized LOC114123896	964	10	8	3	72	65	47	0.76	0.6	0.22	4.57	4.24	2.69	0.526667	3.83333	11.4527	3.51761	2.34e-12	2.89e-10	yes	up	XP_027842832.1(uncharacterized protein LOC114123896 [Aphis gossypii])	GO:0016021(cellular_component:integral component of membrane)	0	0	0	0	0	0	0	114123896
gene-LOC114133080	yes|down	1	gene-LOC114133080	LOC114133080	discoidin domain-containing receptor 2-like	2958	102.73	96.94	79.89	38	27	36	10.85	13.34	5.34	1.47	2.26	2.77	9.84333	2.16667	0.468297	-1.0945	0.000163132	0.00294971	yes	down	XP_027854505.1(discoidin domain-containing receptor 2-like [Aphis gossypii])	GO:0016021(cellular_component:integral component of membrane); GO:0004713(molecular_function:protein tyrosine kinase activity); GO:0005524(molecular_function:ATP binding)	K05125	DDR2, TKT, CD167b	0	ENOG410XQAI(T:Signal transduction mechanisms)	ENOG410XQAI(ttk protein kinase)	PF07714.18(PK_Tyr_Ser-Thr:Protein tyrosine and serine/threonine kinase); PF00069.26(Pkinase:Protein kinase domain)	sp|Q62371|DDR2_MOUSE(Discoidin domain-containing receptor 2 OS=Mus musculus OX=10090 GN=Ddr2 PE=1 SV=2)	114133080
gene-LOC114120680	yes|up	1	gene-LOC114120680	LOC114120680	uncharacterized LOC114120680	3620	206	346	255	495	452	412	3.97	7.26	4.39	11.59	12.34	9.61	5.20667	11.18	2.16888	1.11695	4.26e-05	0.000980405	yes	up	XP_027838462.1(uncharacterized protein LOC114120680 [Aphis gossypii])	GO:0016758(molecular_function:transferase activity, transferring hexosyl groups); GO:0015020(molecular_function:glucuronosyltransferase activity); GO:0016021(cellular_component:integral component of membrane)	K00699	UGT	map05207(Chemical carcinogenesis - receptor activation); map05204(Chemical carcinogenesis - DNA adducts); map00983(Drug metabolism - other enzymes); map00982(Drug metabolism - cytochrome P450); map01240(Biosynthesis of cofactors); map04976(Bile secretion); map00040(Pentose and glucuronate interconversions); map00980(Metabolism of xenobiotics by cytochrome P450); map00860(Porphyrin and chlorophyll…	COG1819(S:Function unknown)	COG1819(Transferase)	PF00201.19(UDPGT:UDP-glucoronosyl and UDP-glucosyl transferase); PF04101.17(Glyco_tran_28_C:Glycosyltransferase family 28 C-terminal domain); PF13439.7(Glyco_transf_4:Glycosyltransferase Family 4)	sp|P36511|UDB15_RAT(UDP-glucuronosyltransferase 2B15 OS=Rattus norvegicus OX=10116 GN=Ugt2b15 PE=1 SV=1)	114120680
gene-LOC114129942	yes|up	1	gene-LOC114129942	LOC114129942	zinc finger protein 512B-like	1264	18979	29995	7114	32425	44590	67602	1024.78	1598.87	362.16	1769.33	2476.9	3512.82	995.27	2586.35	3.41139	1.77036	0.000572734	0.00800297	yes	up	KAF0766015.1(zinc finger protein 512B-like, partial [Aphis craccivora])	0	0	0	0	0	0	0	0	114129942
gene-LOC114119006	yes|down	1	gene-LOC114119006	LOC114119006	aromatic-L-amino-acid decarboxylase-like	1968	1717	2788	2949	842	568	868	63.19	96.05	100.08	31.06	21.3	30.28	86.44	27.5467	0.389727	-1.35946	1.2e-05	0.000344919	yes	down	XP_027836260.1(aromatic-L-amino-acid decarboxylase-like [Aphis gossypii])	GO:0006520(biological_process:cellular amino acid metabolic process); GO:0016831(molecular_function:carboxy-lyase activity); GO:0030170(molecular_function:pyridoxal phosphate binding)	K01593	DDC, TDC	map00350(Tyrosine metabolism); map00380(Tryptophan metabolism); map00360(Phenylalanine metabolism); map04361(Axon regeneration); map04728(Dopaminergic synapse); map05034(Alcoholism); map04726(Serotonergic synapse); map05030(Cocaine addiction); map05031(Amphetamine addiction)	COG0076(E:Amino acid transport and metabolism)	COG0076(decarboxylase)	PF00282.20(Pyridoxal_deC:Pyridoxal-dependent decarboxylase conserved domain); PF01212.22(Beta_elim_lyase:Beta-eliminating lyase)	sp|P48861|DDC_MANSE(Aromatic-L-amino-acid decarboxylase OS=Manduca sexta OX=7130 GN=Ddc PE=2 SV=1)	114119006
gene-LOC114132624	yes|up	1	gene-LOC114132624	LOC114132624	uncharacterized LOC114132624	1505	0	0	0	24	19	13	0	0	0	1.05	0.85	0.54	0	0.813333	130.993	7.03334	2.3e-07	1.07e-05	yes	up	XP_027853937.1(uncharacterized protein LOC114132624 [Aphis gossypii])	0	0	0	0	0	0	0	0	114132624
gene-LOC114128148	yes|up	1	gene-LOC114128148	LOC114128148	uncharacterized LOC114128148	2687	6553	3529	1840	9441	11805	6062	136.1	72.29	36.4	204.73	259.8	124.98	81.5967	196.503	3.07199	1.61917	0.000286463	0.00463495	yes	up	XP_027848395.1(uncharacterized protein LOC114128148 [Aphis gossypii])	0	0	0	0	ENOG410XQTA(S:Function unknown)	ENOG410XQTA(-)	0	0	114128148
gene-LOC114123033	yes|up	1	gene-LOC114123033	LOC114123033	uncharacterized LOC114123033	444	25	27	20	44	38	44	8.07	8.4	6	14.6	12.71	13.62	7.49	13.6433	2.27514	1.18595	0.000878259	0.0110503	yes	up	KAE9544181.1(hypothetical protein AGLY_001360 [Aphis glycines])	GO:0016787(molecular_function:hydrolase activity)	K18266	NDRG1	0	ENOG410XSPF(S:Function unknown)	ENOG410XSPF(NDRG family member)	0	0	114123033
gene-LOC114121770	yes|up	1	gene-LOC114121770	LOC114121770	brain-specific angiogenesis inhibitor 1-associated protein 2, transcript variant X1	3463	655	390	301	900	940	834	6.77	4.12	2.95	9.93	10.59	8.66	4.61333	9.72667	2.63245	1.39641	1.01e-06	4.01e-05	yes	up	XP_027840029.1(brain-specific angiogenesis inhibitor 1-associated protein 2-like protein 2 isoform X1 [Aphis gossypii])	GO:0007009(biological_process:plasma membrane organization)	K05627	BAIAP2, IRSP53	map05135(Yersinia infection); map04520(Adherens junction); map04810(Regulation of actin cytoskeleton); map05130(Pathogenic Escherichia coli infection)	ENOG41110CD(S:Function unknown)	ENOG41110CD(BAI1-associated protein 2)	PF08397.12(IMD:IRSp53/MIM homology domain); PF00018.29(SH3_1:SH3 domain); PF14604.7(SH3_9:Variant SH3 domain); PF07653.18(SH3_2:Variant SH3 domain); PF16746.6(BAR_3:BAR domain of APPL family)	sp|Q6GMN2|BAIP2_RAT(Brain-specific angiogenesis inhibitor 1-associated protein 2 OS=Rattus norvegicus OX=10116 GN=Baiap2 PE=1 SV=1)	114121770
gene-LOC114132980	yes|up	1	gene-LOC114132980	LOC114132980	uncharacterized LOC114132980	1431	0	0	0	8	5	3	0	0	0	1.51	0.99	0.28	0	0.926667	37.1323	5.2146	0.00263035	0.025613	yes	up	XP_027854393.1(uncharacterized protein LOC114132980 [Aphis gossypii])	0	0	0	0	ENOG4112BST(S:Function unknown); ENOG4111DZN(S:Function unknown); ENOG4112A9I(S:Function unknown)	ENOG4112BST(MULE transposase domain); ENOG4111DZN(-); ENOG4112A9I(-)	PF10551.10(MULE:MULE transposase domain); PF13920.7(zf-C3HC4_3:Zinc finger, C3HC4 type (RING finger)); PF14447.7(Prok-RING_4:Prokaryotic RING finger family 4)	0	114132980
gene-LOC114124295	yes|down	1	gene-LOC114124295	LOC114124295	dynein assembly factor 4, axonemal-like	1507	41	57	68	12	11	4	2.63	3.39	4.24	0.64	0.49	0.23	3.42	0.453333	0.208177	-2.26411	3.63e-05	0.000858643	yes	down	XP_027843304.1(dynein assembly factor 4, axonemal-like [Aphis gossypii])	GO:0003341(biological_process:cilium movement)	K19758	DYX1C1, DNAAF4	0	COG0457(S:Function unknown)	COG0457(-)	PF13181.7(TPR_8:Tetratricopeptide repeat); PF13424.7(TPR_12:Tetratricopeptide repeat); PF04969.17(CS:CS domain)	sp|Q5VJS5|DAAF4_RAT(Dynein assembly factor 4, axonemal OS=Rattus norvegicus OX=10116 GN=Dnaaf4 PE=1 SV=1)	114124295
gene-LOC114119291	yes|down	1	gene-LOC114119291	LOC114119291	uncharacterized LOC114119291	1001	11	7	26	0	0	0	0.79	0.49	1.77	0	0	0	1.01667	0	0.0160549	-5.96084	0.000151446	0.00277495	yes	down	XP_027836598.1(uncharacterized protein LOC114119291 [Aphis gossypii])	0	0	0	0	0	0	0	0	114119291
gene-LOC114127259	yes|up	1	gene-LOC114127259	LOC114127259	tetra-peptide repeat homeobox protein 1-like	1051	291.11	300	25	1782	711	1070	19.47	19.81	1.59	124.21	50.4	70.93	13.6233	81.8467	7.50166	2.90721	4.11e-05	0.00095226	yes	up	KAE9527252.1(hypothetical protein AGLY_012950, partial [Aphis glycines])	0	0	0	0	ENOG4111M7J(S:Function unknown)	ENOG4111M7J(Cuticular protein)	0	0	114127259
gene-LOC114121672	yes|down	1	gene-LOC114121672	LOC114121672	uncharacterized LOC114121672	519	11	17	21	0	0	0	55.47	78.91	96.65	0	0	0	77.01	0	0.0144495	-6.11283	2.28e-05	0.00058591	yes	down	XP_027839899.1(uncharacterized protein LOC114121672 [Aphis gossypii])	0	0	0	0	0	0	0	0	114121672
gene-LOC114127921	yes|up	1	gene-LOC114127921	LOC114127921	dynein heavy chain 6, axonemal-like	8642	15	7	5	50	21	18	0.09	0.04	0.03	0.32	0.14	0.11	0.0533333	0.19	4.25449	2.08899	0.00136626	0.0155852	yes	up	XP_027848086.1(LOW QUALITY PROTEIN: dynein heavy chain 6, axonemal-like [Aphis gossypii])	GO:0030286(cellular_component:dynein complex); GO:0007018(biological_process:microtubule-based movement); GO:0003777(molecular_function:microtubule motor activity); GO:0005524(molecular_function:ATP binding)	K10408	DNAH	map05016(Huntington disease); map05022(Pathways of neurodegeneration - multiple diseases); map05014(Amyotrophic lateral sclerosis)	COG5245(Z:Cytoskeleton)	COG5245(heavy chain)	PF12774.8(AAA_6:Hydrolytic ATP binding site of dynein motor region); PF12780.8(AAA_8:P-loop containing dynein motor region D4); PF18199.2(Dynein_C:Dynein heavy chain C-terminal domain); PF12781.8(AAA_9:ATP-binding dynein motor region); PF12775.8(AAA_7:P-loop containing dynein motor region); PF12777.8(MT:Microtubule-binding stalk of dynein motor); PF18198.2(AAA_lid_11:Dynein heavy chain AAA lid do…	sp|Q9C0G6|DYH6_HUMAN(Dynein heavy chain 6, axonemal OS=Homo sapiens OX=9606 GN=DNAH6 PE=2 SV=3)	114127921
gene-LOC114125439	yes|down	1	gene-LOC114125439	LOC114125439	cytochrome b5-like	942	1308.9	1344.4	1533.52	465.28	548.46	480.58	44.56	45.43	49.68	15.56	18.5	15.45	46.5567	16.5033	0.464527	-1.10617	1.56e-07	7.74e-06	yes	down	XP_027844878.1(cytochrome b5-like [Aphis gossypii])	GO:0004252(molecular_function:serine-type endopeptidase activity); GO:0016021(cellular_component:integral component of membrane); GO:0046872(molecular_function:metal ion binding); GO:0020037(molecular_function:heme binding); GO:0016491(molecular_function:oxidoreductase activity)	K23490	CYB5	0	COG5274(C:Energy production and conversion); COG5274(I:Lipid transport and metabolism)	COG5274(cytochrome b5); COG5274(cytochrome b5)	PF00173.29(Cyt-b5:Cytochrome b5-like Heme/Steroid binding domain)	sp|P49096|CYB5_MUSDO(Cytochrome b5 OS=Musca domestica OX=7370 GN=Cyt-b5 PE=1 SV=1)	114125439
gene-LOC114130584	yes|down	1	gene-LOC114130584	LOC114130584	protein ALP1-like	1470	45	45	14	0	0	0	1.94	1.92	0.58	0	0	0	1.48	0	0.00698932	-7.16063	2.95e-07	1.32e-05	yes	down	XP_027851388.1(protein ALP1-like [Aphis gossypii])	0	0	0	0	ENOG411206Y(S:Function unknown); COG2801(L:Replication, recombination and repair)	ENOG411206Y(transposon protein); COG2801(Retrotransposon protein)	PF13359.7(DDE_Tnp_4:DDE superfamily endonuclease); PF04827.15(Plant_tran:Plant transposon protein)	sp|Q9M2U3|ALPL_ARATH(Protein ALP1-like OS=Arabidopsis thaliana OX=3702 GN=At3g55350 PE=2 SV=1)	114130584
gene-LOC114130585	yes|down	1	gene-LOC114130585	LOC114130585	uncharacterized LOC114130585	1119	39	23	13	3	1	0	2.39	1.39	0.76	0.19	0.07	0	1.51333	0.0866667	0.0695041	-3.84676	0.000172802	0.0030873	yes	down	XP_027851389.1(uncharacterized protein LOC114130585 [Aphis gossypii])	GO:0005634(cellular_component:nucleus); GO:0003677(molecular_function:DNA binding)	0	0	0	ENOG410XTMJ(S:Function unknown); ENOG410XRA9(S:Function unknown)	ENOG410XTMJ(-); ENOG410XRA9(Alcohol dehydrogenase transcription factor Myb/SANT-like)	PF10545.10(MADF_DNA_bdg:Alcohol dehydrogenase transcription factor Myb/SANT-like); PF02944.21(BESS:BESS motif)	0	114130585
gene-LOC114123730	yes|down	1	gene-LOC114123730	LOC114123730	uncharacterized LOC114123730	572	24197	32298	35975	11713	9157	7275	4359.44	5676.29	6090.09	2179.44	1725.41	1276.47	5375.27	1727.11	0.388864	-1.36266	3.12e-07	1.39e-05	yes	down	XP_027842597.1(uncharacterized protein LOC114123730 [Aphis gossypii])	0	0	0	0	0	0	0	0	114123730
gene-LOC114119181	yes|up	1	gene-LOC114119181	LOC114119181	uncharacterized LOC114119181	2098	141	140	47	230	394	289	3.97	3.91	1.26	6.77	11.81	8.12	3.04667	8.9	3.72252	1.89628	3.33e-05	0.000802202	yes	up	XP_027836474.1(uncharacterized protein LOC114119181 [Aphis gossypii])	0	0	0	0	0	0	0	0	114119181
gene-LOC114119988	yes|up	1	gene-LOC114119988	LOC114119988	farnesol dehydrogenase-like, transcript variant X1	1201	0	2.89	3.94	43.73	26.74	16.96	0	0.16	0.21	2.55	1.59	1	0.123333	1.71333	15.8257	3.98419	2.83e-06	9.82e-05	yes	up	XP_027837545.1(farnesol dehydrogenase-like [Aphis gossypii])	GO:0016491(molecular_function:oxidoreductase activity)	K15890	FOHSDR	map00981(Insect hormone biosynthesis); map00900(Terpenoid backbone biosynthesis)	COG4221(S:Function unknown); COG1028(S:Function unknown)	COG4221(serine 3-dehydrogenase activity); COG1028(Dehydrogenase reductase)	PF00106.26(adh_short:short chain dehydrogenase); PF13561.7(adh_short_C2:Enoyl-(Acyl carrier protein) reductase); PF08659.11(KR:KR domain)	sp|D2WKD9|SDR1_AEDAE(Farnesol dehydrogenase OS=Aedes aegypti OX=7159 GN=SDR-1 PE=1 SV=2)	114119988
gene-LOC114133009	yes|down	1	gene-LOC114133009	LOC114133009	0	2651	270	212	150	26	24	15	6.25	4.94	3.36	0.67	0.6	0.36	4.85	0.543333	0.134641	-2.89281	1.73e-16	3.75e-14	yes	down	XP_026811335.1(dosage compensation regulator [Rhopalosiphum maidis])	GO:0003723(molecular_function:RNA binding); GO:0005524(molecular_function:ATP binding); GO:0004386(molecular_function:helicase activity)	K13184	DHX9	0	COG1643(L:Replication, recombination and repair)	COG1643(helicase)	0	sp|P24785|MLE_DROME(Dosage compensation regulator OS=Drosophila melanogaster OX=7227 GN=mle PE=1 SV=2)	114133009
gene-LOC114129540	yes|down	1	gene-LOC114129540	LOC114129540	uncharacterized LOC114129540	5930	11	8	12	0	1	0	0.1	0.07	0.1	0	0.01	0	0.09	0.00333333	0.0450519	-4.47227	0.0022311	0.0226858	yes	down	XP_027850111.1(uncharacterized protein LOC114129540 [Aphis gossypii])	0	0	0	0	COG2801(L:Replication, recombination and repair); ENOG410Z1QR(S:Function unknown); ENOG410YP2D(S:Function unknown)	COG2801(Retrotransposon protein); ENOG410Z1QR(-); ENOG410YP2D(Integrase core domain protein)	PF05380.14(Peptidase_A17:Pao retrotransposon peptidase); PF18701.2(DUF5641:Family of unknown function (DUF5641)); PF03564.16(DUF1759:Protein of unknown function (DUF1759)); PF05585.13(DUF1758:Putative peptidase (DUF1758)); PF17921.2(Integrase_H2C2:Integrase zinc binding domain); PF13650.7(Asp_protease_2:Aspartyl protease); PF00078.28(RVT_1:Reverse transcriptase (RNA-dependent DNA polymerase))	0	114129540
gene-LOC114120786	yes|up	1	gene-LOC114120786	LOC114120786	homeobox protein rough-like	1344	16	19	12	33	31	26	0.77	0.91	0.55	1.66	1.59	1.25	0.743333	1.5	2.48969	1.31597	0.00246911	0.0245843	yes	up	XP_027838620.1(LOW QUALITY PROTEIN: homeobox protein rough-like [Aphis gossypii])	GO:0043565(molecular_function:sequence-specific DNA binding); GO:0005634(cellular_component:nucleus); GO:0006355(biological_process:regulation of transcription, DNA-templated)	K09362	K09362	0	ENOG410ZTBY(S:Function unknown)	ENOG410ZTBY(-)	PF00046.30(Homeodomain:Homeodomain)	sp|P18264|ROUGH_DROVI(Homeobox protein rough OS=Drosophila virilis OX=7244 GN=ro PE=3 SV=2)	114120786
gene-LOC114121915	yes|up	1	gene-LOC114121915	LOC114121915	SOSS complex subunit C homolog	566	110	96	79	189	173	196	20.25	17.23	13.66	35.92	33.29	35.11	17.0467	34.7733	2.55603	1.35391	1.8e-10	1.55e-08	yes	up	XP_027840227.1(SOSS complex subunit C homolog [Aphis gossypii])	GO:0070876(cellular_component:SOSS complex); GO:0006281(biological_process:DNA repair)	0	0	0	ENOG4111QHU(S:Function unknown)	ENOG4111QHU(INTS3 and NABP interacting protein)	PF15925.6(SOSSC:SOSS complex subunit C)	sp|B4KZN6|SOSSC_DROMO(SOSS complex subunit C homolog OS=Drosophila mojavensis OX=7230 GN=GI11782 PE=3 SV=1)	114121915
gene-LOC114119031	yes|down	1	gene-LOC114119031	LOC114119031	ras and EF-hand domain-containing protein homolog, transcript variant X3	1837	418	453	363	165	95	52	9.87	11.22	8.32	3.77	2.23	1.15	9.80333	2.38333	0.322491	-1.63267	2.12e-05	0.000551412	yes	down	XP_027836287.1(ras and EF-hand domain-containing protein homolog [Aphis gossypii])	GO:0003924(molecular_function:GTPase activity); GO:0005509(molecular_function:calcium ion binding); GO:0005525(molecular_function:GTP binding)	K17199	RASEF, RAB45	0	ENOG410XPUI(S:Function unknown)	ENOG410XPUI(member RAS oncogene family)	PF00071.23(Ras:Ras family); PF08477.14(Roc:Ras of Complex, Roc, domain of DAPkinase); PF00025.22(Arf:ADP-ribosylation factor family); PF00036.33(EF-hand_1:EF hand); PF13405.7(EF-hand_6:EF-hand domain); PF13202.7(EF-hand_5:EF hand); PF13499.7(EF-hand_7:EF-hand domain pair); PF13833.7(EF-hand_8:EF-hand domain pair); PF01926.24(MMR_HSR1:50S ribosome-binding GTPase); PF00009.28(GTP_EFTU:Elongation fa…	sp|Q08CX1|RASEF_XENTR(Ras and EF-hand domain-containing protein OS=Xenopus tropicalis OX=8364 GN=rasef PE=2 SV=1)	114119031
gene-LOC114126826	yes|down	1	gene-LOC114126826	LOC114126826	septin-2A	2073	1546	1393	1312	619	388	596	44.15	39.43	35.74	18.48	11.8	16.97	39.7733	15.75	0.48751	-1.0365	1.52e-07	7.59e-06	yes	down	XP_027846654.1(septin-2A [Aphis gossypii])	GO:0005525(molecular_function:GTP binding)	K16943	44808	map04210(Apoptosis); map04215(Apoptosis - multiple species)	COG5019(S:Function unknown)	COG5019(-)	PF00735.19(Septin:Septin); PF01926.24(MMR_HSR1:50S ribosome-binding GTPase); PF03193.17(RsgA_GTPase:RsgA GTPase); PF04548.17(AIG1:AIG1 family); PF13401.7(AAA_22:AAA domain)	sp|O43236|SEPT4_HUMAN(Septin-4 OS=Homo sapiens OX=9606 GN=SEPTIN4 PE=1 SV=1)	114126826
gene-LOC114119211	yes|up	1	gene-LOC114119211	LOC114119211	lipase member H-B-like, transcript variant X1	927	0	0	1.17	32.08	20.73	11.41	0	0	0.05	2.45	1.75	0.87	0.0166667	1.69	76.2824	6.25328	5.13e-06	0.000165224	yes	up	XP_027836507.1(lipase member H-B-like isoform X1 [Aphis gossypii])	GO:0005576(cellular_component:extracellular region); GO:0006629(biological_process:lipid metabolic process); GO:0052689(molecular_function:carboxylic ester hydrolase activity)	0	0	0	ENOG4111JY5(S:Function unknown); ENOG410YGS3(S:Function unknown)	ENOG4111JY5(Lipase); ENOG410YGS3(pancreatic triacylglycerol lipase)	PF00151.20(Lipase:Lipase)	sp|Q641F6|LIPHB_XENLA(Lipase member H-B OS=Xenopus laevis OX=8355 GN=liph-b PE=2 SV=1)	114119211
gene-LOC114119210	yes|down	1	gene-LOC114119210	LOC114119210	hepatic triacylglycerol lipase-like, transcript variant X1	1476	120	197	142	7	1	3	7.18	11.81	8.33	0.31	0.05	0.19	9.10667	0.183333	0.030479	-5.03604	2.5e-17	6.11e-15	yes	down	XP_027836503.1(lipase member H-B-like isoform X1 [Aphis gossypii])	GO:0005576(cellular_component:extracellular region); GO:0006629(biological_process:lipid metabolic process); GO:0052689(molecular_function:carboxylic ester hydrolase activity)	0	0	0	ENOG4111JY5(S:Function unknown)	ENOG4111JY5(Lipase)	PF00151.20(Lipase:Lipase)	sp|Q641F6|LIPHB_XENLA(Lipase member H-B OS=Xenopus laevis OX=8355 GN=liph-b PE=2 SV=1)	114119210
gene-LOC114121357	yes|down	1	gene-LOC114121357	LOC114121357	uncharacterized LOC114121357, transcript variant X1	2481	76	48	51	28	9	12	1.77	1.11	1.13	0.68	0.23	0.28	1.33667	0.396667	0.359095	-1.47756	0.00259786	0.0254378	yes	down	XP_027839452.1(uncharacterized protein LOC114121357 isoform X1 [Aphis gossypii])	0	0	0	0	ENOG4111WZC(S:Function unknown)	ENOG4111WZC(-)	0	0	114121357
gene-LOC114127658	yes|down	1	gene-LOC114127658	LOC114127658	uncharacterized LOC114127658, transcript variant X1	3122	38	30	47	6	4	11	0.69	0.54	0.82	0.11	0.08	0.2	0.683333	0.13	0.236497	-2.08011	0.00030703	0.00493135	yes	down	XP_027847761.1(uncharacterized protein LOC114127658 isoform X1 [Aphis gossypii])	0	0	0	0	COG0507(L:Replication, recombination and repair)	COG0507(exodeoxyribonuclease v alpha)	PF13909.7(zf-H2C2_5:C2H2-type zinc-finger domain); PF00096.27(zf-C2H2:Zinc finger, C2H2 type); PF13894.7(zf-C2H2_4:C2H2-type zinc finger)	0	114127658
gene-LOC114127550	yes|down	1	gene-LOC114127550	LOC114127550	glycine-rich cell wall structural protein 1.0-like	1347	1389.3	550.2	349.12	160.14	34.19	122.14	56.52	22.44	13.17	8.59	1.92	6.12	30.71	5.54333	0.18024	-2.47201	3.63e-05	0.000858643	yes	down	XP_027847620.1(glycine-rich cell wall structural protein 1.0-like [Aphis gossypii])	0	0	0	0	0	0	0	0	114127550
gene-LOC114132936	yes|up	1	gene-LOC114132936	LOC114132936	uncharacterized LOC114132936	3337	14.13	51.15	71.24	953.12	220.27	512.28	0.56	1.34	1.72	20.68	6.16	12.5	1.20667	13.1133	15.1555	3.92177	1.07e-09	7.94e-08	yes	up	XP_027854346.1(uncharacterized protein LOC114132936 [Aphis gossypii])	GO:0005506(molecular_function:iron ion binding); GO:0016705(molecular_function:oxidoreductase activity, acting on paired donors, with incorporation or reduction of molecular oxygen); GO:0004497(molecular_function:monooxygenase activity); GO:0020037(molecular_function:heme binding)	K14999	CYP6	0	COG2124(Q:Secondary metabolites biosynthesis, transport and catabolism)	COG2124(Cytochrome p450)	PF00067.23(p450:Cytochrome P450)	sp|Q9V4U9|C6A13_DROME(Probable cytochrome P450 6a13 OS=Drosophila melanogaster OX=7227 GN=Cyp6a13 PE=2 SV=1)	114132936
gene-LOC114132935	yes|down	1	gene-LOC114132935	LOC114132935	tetratricopeptide repeat protein 12-like, transcript variant X1	1442	81	57	187	31	16	11	4.55	3.65	13.08	2.11	0.89	0.61	7.09333	1.20333	0.224	-2.15843	0.000389722	0.00593616	yes	down	XP_027854344.1(tetratricopeptide repeat protein 12-like isoform X1 [Aphis gossypii])	0	K24652	TTC12	0	ENOG410XTCJ(S:Function unknown)	ENOG410XTCJ(tetratricopeptide repeat domain)	PF00515.29(TPR_1:Tetratricopeptide repeat); PF07719.18(TPR_2:Tetratricopeptide repeat); PF13424.7(TPR_12:Tetratricopeptide repeat); PF13181.7(TPR_8:Tetratricopeptide repeat); PF13428.7(TPR_14:Tetratricopeptide repeat); PF14559.7(TPR_19:Tetratricopeptide repeat); PF13414.7(TPR_11:TPR repeat)	sp|Q95LY5|TTC12_MACFA(Tetratricopeptide repeat protein 12 (Fragment) OS=Macaca fascicularis OX=9541 GN=TTC12 PE=2 SV=1)	114132935
gene-LOC114119177	yes|down	1	gene-LOC114119177	LOC114119177	uncharacterized LOC114119177	4244	186	221	181	65	22	46	2.4	2.83	2.23	0.88	0.3	0.59	2.48667	0.59	0.287872	-1.7965	1.48e-06	5.5e-05	yes	down	XP_027836469.1(uncharacterized protein LOC114119177 [Aphis gossypii])	0	0	0	0	0	0	0	0	114119177
gene-LOC114131222	yes|up	1	gene-LOC114131222	LOC114131222	putative nuclease HARBI1	2324	146	92	77	421	312	298	3.73	2.31	1.89	11.26	8.75	7.6	2.64333	9.20333	4.27495	2.09591	3.68e-15	6.83e-13	yes	up	KAF0714699.1(putative nuclease HARBI1 [Aphis craccivora])	0	K23222	HARBI1	0	ENOG411206Y(S:Function unknown); ENOG410XZQD(S:Function unknown)	ENOG411206Y(transposon protein); ENOG410XZQD(-)	PF13359.7(DDE_Tnp_4:DDE superfamily endonuclease); PF04827.15(Plant_tran:Plant transposon protein); PF01609.22(DDE_Tnp_1:Transposase DDE domain)	sp|Q96MB7|HARB1_HUMAN(Putative nuclease HARBI1 OS=Homo sapiens OX=9606 GN=HARBI1 PE=1 SV=1)	114131222
gene-LOC114119672	yes|down	1	gene-LOC114119672	LOC114119672	uncharacterized LOC114119672	831	202	172	146	0	0	5	19	15.93	13.01	0	0	0.46	15.98	0.153333	0.0125757	-6.31322	2.79e-18	7.29e-16	yes	down	XP_027837119.1(uncharacterized protein LOC114119672 [Aphis gossypii])	0	0	0	0	0	0	0	0	114119672
gene-LOC114131189	yes|up	1	gene-LOC114131189	LOC114131189	uncharacterized LOC114131189, transcript variant X2	1287	542	388	674	1681	1208	2951	25.48	18.75	30.94	75.71	54.25	127.51	25.0567	85.8233	4.72125	2.23917	8.78e-09	5.61e-07	yes	up	XP_027852153.1(uncharacterized protein LOC114131189 isoform X2 [Aphis gossypii])	0	0	0	0	0	0	0	0	114131189
gene-LOC114127558	yes|down	1	gene-LOC114127558	LOC114127558	probable uridine nucleosidase 1, transcript variant X2	1586	174	144	657	45	49	49	6.85	5.59	24.6	1.85	2.04	1.93	12.3467	1.94	0.18659	-2.42206	8.04e-05	0.00165534	yes	down	XP_027847630.1(probable uridine nucleosidase 1 isoform X1 [Aphis gossypii])	0	K01239	iunH	map00230(Purine metabolism); map00760(Nicotinate and nicotinamide metabolism)	COG1957(F:Nucleotide transport and metabolism); COG1199(L:Replication, recombination and repair)	COG1957(nucleoside hydrolase); COG1199(helicase)	PF01156.20(IU_nuc_hydro:Inosine-uridine preferring nucleoside hydrolase)	sp|Q6ZJ05|URH1_ORYSJ(Probable uridine nucleosidase 1 OS=Oryza sativa subsp. japonica OX=39947 GN=URH1 PE=2 SV=1)	114127558
gene-LOC114119912	yes|up	1	gene-LOC114119912	LOC114119912	uncharacterized LOC114119912, transcript variant X2	2485	121	129	73	194	193	205	3.06	3.23	1.73	5.13	5.19	5.17	2.67333	5.16333	2.39933	1.26263	3.87e-06	0.000128241	yes	up	XP_027837450.1(uncharacterized protein LOC114119912 [Aphis gossypii])	0	0	0	0	ENOG410XR88(S:Function unknown)	ENOG410XR88(semaphorin receptor activity)	PF01833.25(TIG:IPT/TIG domain)	0	114119912
gene-LOC114133090	yes|up	1	gene-LOC114133090	LOC114133090	heat shock protein 70 A1-like	2242	0	1.87	0	4060.41	423.21	4122.92	0	0.05	0	110.74	11.76	107.28	0.0166667	76.5933	5385.08	12.3948	1.23e-14	2.18e-12	yes	up	XP_027854502.1(heat shock protein 70 A1-like [Aphis gossypii])	GO:0005524(molecular_function:ATP binding)	K03283	HSPA1s	map05162(Measles); map05145(Toxoplasmosis); map04915(Estrogen signaling pathway); map04010(MAPK signaling pathway); map03040(Spliceosome); map05134(Legionellosis); map04213(Longevity regulating pathway - multiple species); map05417(Lipid and atherosclerosis); map04144(Endocytosis); map04612(Antigen processing and presentation); map04141(Protein processing in endoplasmic reticulum); map05020(Prion…	COG0443(O:Posttranslational modification, protein turnover, chaperones)	COG0443(Heat shock protein)	PF00012.21(HSP70:Hsp70 protein); PF06723.14(MreB_Mbl:MreB/Mbl protein)	sp|P41825|HSP71_ANOAL(Heat shock protein 70 A1 OS=Anopheles albimanus OX=7167 GN=HSP70A1 PE=3 SV=1)	114133090
gene-LOC114125209	yes|up	1	gene-LOC114125209	LOC114125209	proton myo-inositol cotransporter-like, transcript variant X1	1693	135.12	123.06	216.04	481.25	497.88	518.41	4.87	4.32	7.37	18.18	19.22	18.65	5.52	18.6833	4.08377	2.0299	1.57e-11	1.61e-09	yes	up	XP_027844554.1(proton myo-inositol cotransporter-like [Aphis gossypii])	GO:0022857(molecular_function:transmembrane transporter activity); GO:0016021(cellular_component:integral component of membrane)	K08144	SLC2A6, GLUT6	0	ENOG410XNQK(G:Carbohydrate transport and metabolism)	ENOG410XNQK(Transporter)	PF00083.25(Sugar_tr:Sugar (and other) transporter); PF07690.17(MFS_1:Major Facilitator Superfamily); PF14325.7(DUF4383:Domain of unknown function (DUF4383)); PF06609.14(TRI12:Fungal trichothecene efflux pump (TRI12))	sp|A5LGM7|TRET1_POLVA(Facilitated trehalose transporter Tret1 OS=Polypedilum vanderplanki OX=319348 GN=Tret1 PE=1 SV=1)	114125209
gene-LOC114125979	yes|up	1	gene-LOC114125979	LOC114125979	phytoene desaturase-like, transcript variant X1	2247	963	873	699	1494	1705	1195	38.27	30.18	22.68	54.54	60.87	39.27	30.3767	51.56	2.27314	1.18469	8.45e-08	4.4e-06	yes	up	XP_027845629.1(phytoene desaturase-like [Aphis gossypii])	GO:0016117(biological_process:carotenoid biosynthetic process); GO:0016021(cellular_component:integral component of membrane); GO:0016491(molecular_function:oxidoreductase activity)	K15745	AL1	0	COG1233(Q:Secondary metabolites biosynthesis, transport and catabolism)	COG1233(phytoene)	PF01593.25(Amino_oxidase:Flavin containing amine oxidoreductase); PF13450.7(NAD_binding_8:NAD(P)-binding Rossmann-like domain); PF01266.25(DAO:FAD dependent oxidoreductase); PF07992.15(Pyr_redox_2:Pyridine nucleotide-disulphide oxidoreductase); PF00890.25(FAD_binding_2:FAD binding domain); PF03486.15(HI0933_like:HI0933-like protein); PF00996.19(GDI:GDP dissociation inhibitor); PF01134.23(GIDA:Glu…	sp|P54982|CRTI_PHYB8(Phytoene desaturase OS=Phycomyces blakesleeanus (strain ATCC 8743b / DSM 1359 / FGSC 10004 / NBRC 33097 / NRRL 1555) OX=763407 GN=carB PE=3 SV=1)	114125979
gene-LOC114127792	yes|down	1	gene-LOC114127792	LOC114127792	potassium voltage-gated channel protein Shab	1458	555	452	272	118	105	166	24.19	19.5	11.29	5.37	4.86	7.2	18.3267	5.81	0.400797	-1.31905	5.4e-05	0.00118096	yes	down	XP_026807429.1(potassium voltage-gated channel protein Shab isoform X1 [Rhopalosiphum maidis])	GO:0034765(biological_process:regulation of ion transmembrane transport); GO:0051260(biological_process:protein homooligomerization); GO:0008076(cellular_component:voltage-gated potassium channel complex); GO:0005249(molecular_function:voltage-gated potassium channel activity)	K04885	KCNB1, KV2.1	0	COG1226(P:Inorganic ion transport and metabolism)	COG1226(PotAssium voltage-gated channel)	PF00520.32(Ion_trans:Ion transport protein); PF07885.17(Ion_trans_2:Ion channel)	sp|P17970|KCNAB_DROME(Potassium voltage-gated channel protein Shab OS=Drosophila melanogaster OX=7227 GN=Shab PE=1 SV=2)	114127792
gene-LOC114133055	yes|down	1	gene-LOC114133055	LOC114133055	myb-like protein P	1360	755	589	400	198	114	210	25.92	20.21	12.98	7.41	4.09	7.19	19.7033	6.23	0.390322	-1.35726	1.25e-05	0.000353591	yes	down	XP_027854477.1(myb-like protein P [Aphis gossypii])	GO:0034765(biological_process:regulation of ion transmembrane transport); GO:0051260(biological_process:protein homooligomerization); GO:0008076(cellular_component:voltage-gated potassium channel complex); GO:0005249(molecular_function:voltage-gated potassium channel activity)	K04885	KCNB1, KV2.1	0	COG1226(S:Function unknown)	COG1226(zinc finger)	0	0	114133055
gene-LOC114131342	yes|up	1	gene-LOC114131342	LOC114131342	uncharacterized LOC114131342	5120	7.51	11.96	8.21	54	28	17.32	0.08	0.13	0.08	0.6	0.31	0.18	0.0966667	0.363333	4.48933	2.1665	0.000328056	0.00518221	yes	up	XP_027852333.1(uncharacterized protein LOC114131342 [Aphis gossypii])	GO:0003678(molecular_function:DNA helicase activity); GO:0006310(biological_process:DNA recombination); GO:0000723(biological_process:telomere maintenance); GO:0005524(molecular_function:ATP binding); GO:0006281(biological_process:DNA repair)	0	0	0	COG0507(L:Replication, recombination and repair); ENOG410Y4KS(S:Function unknown); ENOG410ZBKS(S:Function unknown)	COG0507(exodeoxyribonuclease v alpha); ENOG410Y4KS(helicase-like protein); ENOG410ZBKS(-)	PF05970.15(PIF1:PIF1-like helicase); PF14214.7(Helitron_like_N:Helitron helicase-like domain at N-terminus); PF13604.7(AAA_30:AAA domain)	sp|Q0R4F1|PIF1_XENLA(ATP-dependent DNA helicase PIF1 OS=Xenopus laevis OX=8355 GN=pif1 PE=2 SV=1)	114131342
gene-LOC114121591	yes|up	1	gene-LOC114121591	LOC114121591	putative glutathione-specific gamma-glutamylcyclotransferase 2	721	0	0	0	95.36	47.14	54	0	0	0	11.68	5.86	6.27	0	7.93667	453.744	8.82573	2.73e-12	3.31e-10	yes	up	XP_027839798.1(putative glutathione-specific gamma-glutamylcyclotransferase 2 [Aphis gossypii])	GO:0061928(molecular_function:glutathione specific gamma-glutamylcyclotransferase activity); GO:0006751(biological_process:glutathione catabolic process); GO:0016740(molecular_function:transferase activity); GO:0003839(molecular_function:gamma-glutamylcyclotransferase activity)	K15627;K07232	ASPSCR1, ASPL;CHAC, chaC	map00480(Glutathione metabolism); map05202(Transcriptional misregulation in cancer)	COG3703(P:Inorganic ion transport and metabolism)	COG3703(cation transport)	PF04752.13(ChaC:ChaC-like protein); PF06094.13(GGACT:Gamma-glutamyl cyclotransferase, AIG2-like)	sp|Q5ZI66|CHAC2_CHICK(Putative glutathione-specific gamma-glutamylcyclotransferase 2 OS=Gallus gallus OX=9031 GN=chac2 PE=2 SV=1)	114121591
gene-LOC114124041	yes|down	1	gene-LOC114124041	LOC114124041	alpha-(1,6)-fucosyltransferase-like, transcript variant X2	2010	77	54	44	20	9	11	2.27	1.59	1.23	0.62	0.29	0.32	1.69667	0.41	0.296152	-1.75559	0.00010413	0.00204514	yes	down	XP_027843006.1(alpha-(1,6)-fucosyltransferase-like [Aphis gossypii])	GO:0008424(molecular_function:glycoprotein 6-alpha-L-fucosyltransferase activity); GO:0016758(molecular_function:transferase activity, transferring hexosyl groups); GO:0032580(cellular_component:Golgi cisterna membrane); GO:0033578(biological_process:protein glycosylation in Golgi); GO:0016021(cellular_component:integral component of membrane)	K00717	FUT8	map00510(N-Glycan biosynthesis); map00513(Various types of N-glycan biosynthesis); map05202(Transcriptional misregulation in cancer); map00533(Glycosaminoglycan biosynthesis - keratan sulfate)	ENOG410YHM8(S:Function unknown)	ENOG410YHM8(Catalyzes the addition of fucose in alpha 1-6 linkage to the first GlcNAc residue, next to the peptide chains in N-glycans (By similarity))	PF14604.7(SH3_9:Variant SH3 domain); PF10250.10(O-FucT:GDP-fucose protein O-fucosyltransferase)	sp|Q9VYV5|FUT8_DROME(Alpha-(1,6)-fucosyltransferase OS=Drosophila melanogaster OX=7227 GN=FucT6 PE=1 SV=1)	114124041
gene-LOC114127858	yes|up	1	gene-LOC114127858	LOC114127858	uncharacterized LOC114127858, transcript variant X1	1404	4	12.55	2	53.34	188.58	40.86	0.22	0.61	0.09	2.54	9.22	1.86	0.306667	4.54	19.9172	4.31595	4.33e-07	1.87e-05	yes	up	XP_027847997.1(uncharacterized protein LOC114127858 [Aphis gossypii])	GO:0005802(cellular_component:trans-Golgi network); GO:0030136(cellular_component:clathrin-coated vesicle); GO:0005768(cellular_component:endosome); GO:0080025(molecular_function:phosphatidylinositol-3,5-bisphosphate binding); GO:0007040(biological_process:lysosome organization)	0	0	0	ENOG410XRSQ(S:Function unknown)	ENOG410XRSQ(IGc2)	0	0	114127858
gene-LOC114125977	yes|up	1	gene-LOC114125977	LOC114125977	bifunctional lycopene cyclase/phytoene synthase-like, transcript variant X1	1861	343	136	178	448	539	627	10.3	4.12	5.16	14.01	17.12	18.63	6.52667	16.5867	3.27949	1.71347	2.18e-06	7.83e-05	yes	up	XP_027845625.1(bifunctional lycopene cyclase/phytoene synthase-like [Aphis gossypii])	GO:0016765(molecular_function:transferase activity, transferring alkyl or aryl (other than methyl) groups); GO:0016872(molecular_function:intramolecular lyase activity); GO:0016021(cellular_component:integral component of membrane)	K17841	AL2	0	COG1562(I:Lipid transport and metabolism)	COG1562(phytoene synthase)	PF00494.20(SQS_PSY:Squalene/phytoene synthase)	sp|Q9P854|LCPS_PHYB8(Bifunctional lycopene cyclase/phytoene synthase OS=Phycomyces blakesleeanus (strain ATCC 8743b / DSM 1359 / FGSC 10004 / NBRC 33097 / NRRL 1555) OX=763407 GN=carRA PE=1 SV=1)	114125977
gene-LOC114125976	yes|up	1	gene-LOC114125976	LOC114125976	bifunctional lycopene cyclase/phytoene synthase-like, transcript variant X2	2508	1003.84	680.84	614.18	1898.97	1907.42	2099.63	20.38	13.57	11.98	42.09	44.59	46.18	15.31	44.2867	3.38424	1.75883	7.4e-17	1.7e-14	yes	up	XP_027845622.1(bifunctional lycopene cyclase/phytoene synthase-like [Aphis gossypii])	GO:0051996(molecular_function:squalene synthase activity); GO:0004310(molecular_function:farnesyl-diphosphate farnesyltransferase activity); GO:0016021(cellular_component:integral component of membrane); GO:0016872(molecular_function:intramolecular lyase activity)	K17841	AL2	0	COG1562(S:Function unknown)	COG1562(centriole replication)	PF00494.20(SQS_PSY:Squalene/phytoene synthase)	sp|Q67GH9|LCPS_BLATR(Bifunctional lycopene cyclase/phytoene synthase OS=Blakeslea trispora OX=4850 GN=carRA PE=1 SV=1)	114125976
gene-LOC114126087	yes|down	1	gene-LOC114126087	LOC114126087	cytokine receptor-like	2779	42	30	28	1	0	1	0.86	0.61	0.55	0.02	0	0.02	0.673333	0.0133333	0.0260596	-5.26204	3.94e-06	0.000129041	yes	down	XP_027845766.1(LOW QUALITY PROTEIN: cytokine receptor-like [Aphis gossypii])	0	K19599	DOME	map04630(JAK-STAT signaling pathway)	ENOG410ZTN1(S:Function unknown); ENOG410Z0N0(S:Function unknown); ENOG410YNQ4(U:Intracellular trafficking, secretion, and vesicular transport)	ENOG410ZTN1(FN3); ENOG410Z0N0(FN3); ENOG410YNQ4(interleukin 6 signal transducer (gp130, oncostatin M receptor))	PF00041.22(fn3:Fibronectin type III domain); PF09240.11(IL6Ra-bind:Interleukin-6 receptor alpha chain, binding)	sp|Q9VWE0|DOME_DROME(Cytokine receptor OS=Drosophila melanogaster OX=7227 GN=dome PE=1 SV=1)	114126087
gene-LOC114126083	yes|up	1	gene-LOC114126083	LOC114126083	uncharacterized LOC114126083	1807	5583	15320	2374	16570	16891	25132	187.37	509.41	75.97	581.13	603.16	840.44	257.583	674.91	3.27606	1.71196	0.00383631	0.0345852	yes	up	XP_027845760.1(uncharacterized protein LOC114126083 [Aphis gossypii])	GO:0030246(molecular_function:carbohydrate binding)	0	0	0	ENOG410ZUGU(S:Function unknown); ENOG410XPJ1(S:Function unknown)	ENOG410ZUGU(CLECT); ENOG410XPJ1(CLECT)	PF00059.22(Lectin_C:Lectin C-type domain)	0	114126083
gene-LOC114126850	yes|up	1	gene-LOC114126850	LOC114126850	uncharacterized LOC114126850	867	16	22	16	40	75	54	1.41	1.91	1.34	3.67	6.99	4.7	1.55333	5.12	4.12238	2.04348	1.02e-05	0.000298795	yes	up	XP_027846687.1(uncharacterized protein LOC114126850, partial [Aphis gossypii])	0	0	0	0	0	0	0	0	114126850
gene-LOC114119754	yes|down	1	gene-LOC114119754	LOC114119754	protein CBFA2T1, transcript variant X1	3252	165	180	132	68	35	51	2.47	2.69	1.88	1.1	0.55	0.71	2.34667	0.786667	0.415482	-1.26714	2.06e-05	0.00053642	yes	down	XP_027837243.1(protein CBFA2T1 isoform X1 [Aphis gossypii])	GO:0003714(molecular_function:transcription corepressor activity); GO:0046872(molecular_function:metal ion binding); GO:0045892(biological_process:negative regulation of transcription, DNA-templated)	K10053	RUNX1T1, CBFA2T1	map05221(Acute myeloid leukemia); map05202(Transcriptional misregulation in cancer); map05200(Pathways in cancer)	ENOG410XR30(K:Transcription)	ENOG410XR30(core-binding factor, runt domain, alpha subunit 2)	PF07531.15(TAFH:NHR1 homology to TAF); PF08788.12(NHR2:NHR2 domain like); PF01753.19(zf-MYND:MYND finger)	sp|Q61909|MTG8_MOUSE(Protein CBFA2T1 OS=Mus musculus OX=10090 GN=Runx1t1 PE=2 SV=1)	114119754
gene-LOC114125990	yes|down	1	gene-LOC114125990	LOC114125990	E3 ubiquitin-protein ligase NRDP1-like	763	46.78	32.53	56.89	12.14	5.77	8.92	5.03	3.44	5.79	1.36	0.65	0.95	4.75333	0.986667	0.253322	-1.98096	9.89e-05	0.00196044	yes	down	XP_027845644.1(E3 ubiquitin-protein ligase NRDP1-like [Aphis gossypii])	GO:0046872(molecular_function:metal ion binding); GO:0061630(molecular_function:ubiquitin protein ligase activity)	K11981	RNF41, NRDP1	map04144(Endocytosis)	ENOG410Z7YX(S:Function unknown); ENOG410XNN7(O:Posttranslational modification, protein turnover, chaperones)	ENOG410Z7YX(Lung seven transmembrane receptor); ENOG410XNN7(RING finger protein 41)	PF13923.7(zf-C3HC4_2:Zinc finger, C3HC4 type (RING finger)); PF13639.7(zf-RING_2:Ring finger domain); PF00097.26(zf-C3HC4:Zinc finger, C3HC4 type (RING finger)); PF13445.7(zf-RING_UBOX:RING-type zinc-finger); PF11789.9(zf-Nse:Zinc-finger of the MIZ type in Nse subunit); PF14835.7(zf-RING_6:zf-RING of BARD1-type protein); PF12678.8(zf-rbx1:RING-H2 zinc finger domain); PF04564.16(U-box:U-box domain…	sp|Q8BH75|RNF41_MOUSE(E3 ubiquitin-protein ligase NRDP1 OS=Mus musculus OX=10090 GN=Rnf41 PE=1 SV=1)	114125990
gene-LOC114126912	yes|up	1	gene-LOC114126912	LOC114126912	uncharacterized LOC114126912	1628	1118	514	492	2117	1500	1268	42.54	19.37	17.84	84.14	60.69	48.04	26.5833	64.29	3.02145	1.59524	2.61e-06	9.17e-05	yes	up	XP_027846755.1(uncharacterized protein LOC114126912 [Aphis gossypii])	0	0	0	0	ENOG410YUHN(S:Function unknown); ENOG4111ITB(S:Function unknown); ENOG410XT4M(S:Function unknown)	ENOG410YUHN(-); ENOG4111ITB(-); ENOG410XT4M(-)	0	0	114126912
gene-LOC114130486	yes|down	1	gene-LOC114130486	LOC114130486	aspartate aminotransferase, cytoplasmic-like	1430	161	1	38	0	1	1	7.19	0.04	1.62	0	0.05	0.04	2.95	0.03	0.0139412	-6.1645	0.000149995	0.00276073	yes	down	XP_027851269.1(aspartate aminotransferase, cytoplasmic-like [Aphis gossypii])	GO:0008483(molecular_function:transaminase activity); GO:0009058(biological_process:biosynthetic process); GO:0006520(biological_process:cellular amino acid metabolic process); GO:0030170(molecular_function:pyridoxal phosphate binding)	K14454	GOT1	map00220(Arginine biosynthesis); map00270(Cysteine and methionine metabolism); map00330(Arginine and proline metabolism); map00250(Alanine, aspartate and glutamate metabolism); map00360(Phenylalanine metabolism); map00350(Tyrosine metabolism); map00400(Phenylalanine, tyrosine and tryptophan biosynthesis)	COG1448(E:Amino acid transport and metabolism)	COG1448(aminotransferase)	PF00155.22(Aminotran_1_2:Aminotransferase class I and II)	sp|A5A6K8|AATC_PANTR(Aspartate aminotransferase, cytoplasmic OS=Pan troglodytes OX=9598 GN=GOT1 PE=2 SV=1)	114130486
gene-LOC114121825	yes|down	1	gene-LOC114121825	LOC114121825	uncharacterized LOC114121825	503	3	20	7	0	0	0	0.71	4.61	1.55	0	0	0	2.29	0	0.0234355	-5.41516	0.00226523	0.0229516	yes	down	XP_027840106.1(uncharacterized protein LOC114121825 [Aphis gossypii])	0	0	0	0	0	0	0	0	114121825
gene-LOC114126916	yes|up	1	gene-LOC114126916	LOC114126916	proton-coupled amino acid transporter-like protein CG1139	566	16.12	27.28	33.07	339.81	333.03	410.29	0.56	0.93	1.09	40.73	38.48	41.71	0.86	40.3067	18.4012	4.20173	9.66e-36	9.25e-33	yes	up	XP_027846761.1(proton-coupled amino acid transporter-like protein CG1139 [Aphis gossypii])	GO:0016021(cellular_component:integral component of membrane)	K14209	SLC36A, PAT	map04974(Protein digestion and absorption)	COG0814(E:Amino acid transport and metabolism)	COG0814(amino acid transport)	PF01490.19(Aa_trans:Transmembrane amino acid transporter protein)	sp|Q9VT04|PATH_DROME(Proton-coupled amino acid transporter-like protein pathetic OS=Drosophila melanogaster OX=7227 GN=path PE=1 SV=1)	114126916
gene-LOC114121829	yes|down	1	gene-LOC114121829	LOC114121829	dopamine beta-hydroxylase	3095	335	297	181	99	51	70	6.08	5.35	3.14	1.88	0.99	1.27	4.85667	1.38	0.350259	-1.51351	2.9e-06	0.000100318	yes	down	XP_027840109.1(dopamine beta-hydroxylase [Aphis gossypii])	GO:0005507(molecular_function:copper ion binding); GO:0004500(molecular_function:dopamine beta-monooxygenase activity)	K00503	DBH	map00350(Tyrosine metabolism)	ENOG410XR89(Z:Cytoskeleton)	ENOG410XR89(LIM and calponin homology domains 1)	PF03712.16(Cu2_monoox_C:Copper type II ascorbate-dependent monooxygenase, C-terminal domain); PF01082.21(Cu2_monooxygen:Copper type II ascorbate-dependent monooxygenase, N-terminal domain); PF03351.18(DOMON:DOMON domain)	sp|P09172|DOPO_HUMAN(Dopamine beta-hydroxylase OS=Homo sapiens OX=9606 GN=DBH PE=1 SV=3)	114121829
gene-LOC114121828	yes|down	1	gene-LOC114121828	LOC114121828	0	2118	127	242	169	45	32	19	3.54	6.68	4.49	1.31	0.95	0.53	4.90333	0.93	0.227241	-2.1377	5.85e-07	2.44e-05	yes	down	KAF0771321.1(putative histone-lysine N-methyltransferase 1 [Aphis craccivora])	GO:0016787(molecular_function:hydrolase activity)	0	0	0	0	0	0	0	114121828
gene-LOC114119459	yes|up	1	gene-LOC114119459	LOC114119459	uncharacterized LOC114119459	944	81.32	43.7	75.29	173.14	62.98	120.66	6.33	3.35	5.56	14.03	5.19	9.29	5.08	9.50333	2.28191	1.19024	0.00444516	0.0385806	yes	up	XP_027836816.1(uncharacterized protein LOC114119459 [Aphis gossypii])	GO:0016021(cellular_component:integral component of membrane); GO:0008083(molecular_function:growth factor activity)	K04358	FGF	map05207(Chemical carcinogenesis - receptor activation); map04810(Regulation of actin cytoskeleton); map05200(Pathways in cancer); map04015(Rap1 signaling pathway); map04014(Ras signaling pathway); map05218(Melanoma); map04010(MAPK signaling pathway); map04020(Calcium signaling pathway); map05224(Breast cancer); map05226(Gastric cancer); map04151(PI3K-Akt signaling pathway)	ENOG4111IPH(T:Signal transduction mechanisms)	ENOG4111IPH(fibroblast growth factor receptor signaling pathway)	PF00167.19(FGF:Fibroblast growth factor)	sp|P41444|FGFH_NPVAC(Fibroblast growth factor homolog OS=Autographa californica nuclear polyhedrosis virus OX=46015 GN=FGF PE=3 SV=1)	114119459
gene-LOC114120029	yes|down	1	gene-LOC114120029	LOC114120029	dynein intermediate chain 2, axonemal-like	1847	41	48	45	6	4	9	1.34	1.56	1.4	0.21	0.14	0.29	1.43333	0.213333	0.183353	-2.4473	3.07e-06	0.000105824	yes	down	XP_027837597.1(LOW QUALITY PROTEIN: dynein intermediate chain 2, axonemal-like [Aphis gossypii])	0	K11143	DNAI2	map05016(Huntington disease); map05022(Pathways of neurodegeneration - multiple diseases); map05014(Amyotrophic lateral sclerosis)	ENOG410XTD6(S:Function unknown)	ENOG410XTD6(Dynein, axonemal, intermediate chain 2)	0	sp|Q9GZS0|DNAI2_HUMAN(Dynein intermediate chain 2, axonemal OS=Homo sapiens OX=9606 GN=DNAI2 PE=1 SV=2)	114120029
gene-LOC114131820	yes|up	1	gene-LOC114131820	LOC114131820	cytochrome P450 4C1-like	1682	0	0	1.8	14.58	54.04	50.57	0	0	0.06	0.56	2.1	1.84	0.02	1.5	79.4505	6.31198	6.15e-07	2.54e-05	yes	up	XP_027852928.1(LOW QUALITY PROTEIN: cytochrome P450 4C1-like [Aphis gossypii])	0	K15001	CYP4	0	COG2124(Q:Secondary metabolites biosynthesis, transport and catabolism)	COG2124(Cytochrome p450)	PF00067.23(p450:Cytochrome P450)	sp|P29981|CP4C1_BLADI(Cytochrome P450 4C1 OS=Blaberus discoidalis OX=6981 GN=CYP4C1 PE=2 SV=1)	114131820
gene-LOC114122639	yes|up	1	gene-LOC114122639	LOC114122639	60S ribosomal protein L12	725	11493	9686	13105	15853	18011	19850	1273.68	1068.9	1388.79	1807.23	2106.61	2181.61	1243.79	2031.82	2.0445	1.03175	3.92e-06	0.000129041	yes	up	XP_027841160.1(60S ribosomal protein L12 [Aphis gossypii])	GO:0070180(molecular_function:large ribosomal subunit rRNA binding); GO:0015934(cellular_component:large ribosomal subunit); GO:0005840(cellular_component:ribosome); GO:0022625(cellular_component:cytosolic large ribosomal subunit); GO:0019843(molecular_function:rRNA binding); GO:0003735(molecular_function:structural constituent of ribosome); GO:0006412(biological_process:translation); GO:0000027(…	K02870	RP-L12e, RPL12	map03010(Ribosome); map05171(Coronavirus disease - COVID-19)	COG0080(J:Translation, ribosomal structure and biogenesis)	COG0080(This protein binds directly to 23S ribosomal RNA (By similarity))	PF03946.15(Ribosomal_L11_N:Ribosomal protein L11, N-terminal domain); PF00298.20(Ribosomal_L11:Ribosomal protein L11, RNA binding domain)	sp|P23358|RL12_RAT(60S ribosomal protein L12 OS=Rattus norvegicus OX=10116 GN=Rpl12 PE=2 SV=1)	114122639
gene-LOC114119352	yes|down	1	gene-LOC114119352	LOC114119352	aminopeptidase N-like, transcript variant X1	3936	848	1005	735	338	219	145	11.76	13.83	9.8	4.85	3.18	1.99	11.7967	3.34	0.347362	-1.52549	1.12e-06	4.41e-05	yes	down	XP_027836677.1(aminopeptidase N-like isoform X1 [Aphis gossypii])	0	K11140	ANPEP, CD13	map04640(Hematopoietic cell lineage); map00480(Glutathione metabolism); map04614(Renin-angiotensin system)	COG0308(E:Amino acid transport and metabolism)	COG0308(aminopeptidase)	PF11838.9(ERAP1_C:ERAP1-like C-terminal domain); PF01433.21(Peptidase_M1:Peptidase family M1 domain); PF17900.2(Peptidase_M1_N:Peptidase M1 N-terminal domain)	sp|P15541|AMPN_RABIT(Aminopeptidase N OS=Oryctolagus cuniculus OX=9986 GN=ANPEP PE=1 SV=4)	114119352
gene-LOC114122324	yes|up	1	gene-LOC114122324	LOC114122324	uncharacterized LOC114122324	1123	83	100	161	336	373	493	4.19	5.16	8.22	19.32	21.04	26.5	5.85667	22.2867	4.51395	2.17439	2.12e-09	1.51e-07	yes	up	XP_027840752.1(uncharacterized protein LOC114122324 [Aphis gossypii])	0	0	0	0	0	0	0	0	114122324
gene-LOC114131043	yes|up	1	gene-LOC114131043	LOC114131043	uncharacterized LOC114131043	5677	0	0	0	12	13	11	0	0	0	0.12	0.13	0.1	0	0.116667	85.034	6.40997	6.24e-06	0.000195	yes	up	XP_027851962.1(uncharacterized protein LOC114131043 [Aphis gossypii])	0	0	0	0	ENOG410Y7Q4(S:Function unknown); COG2801(L:Replication, recombination and repair); ENOG410Z1QR(S:Function unknown)	ENOG410Y7Q4(-); COG2801(Retrotransposon protein); ENOG410Z1QR(-)	PF05380.14(Peptidase_A17:Pao retrotransposon peptidase); PF03564.16(DUF1759:Protein of unknown function (DUF1759)); PF18701.2(DUF5641:Family of unknown function (DUF5641)); PF05585.13(DUF1758:Putative peptidase (DUF1758)); PF17921.2(Integrase_H2C2:Integrase zinc binding domain); PF00078.28(RVT_1:Reverse transcriptase (RNA-dependent DNA polymerase))	0	114131043
gene-LOC114126314	yes|down	1	gene-LOC114126314	LOC114126314	uncharacterized LOC114126314	417	442	769	508	91	43	25	39.46	67.62	43	8.45	4.06	2.2	50.0267	4.90333	0.116416	-3.10264	1.36e-11	1.42e-09	yes	down	XP_027846032.1(uncharacterized protein LOC114126314 [Aphis gossypii])	GO:0004519(molecular_function:endonuclease activity); GO:0004527(molecular_function:exonuclease activity); GO:0008270(molecular_function:zinc ion binding); GO:0003676(molecular_function:nucleic acid binding); GO:0003964(molecular_function:RNA-directed DNA polymerase activity); GO:0016021(cellular_component:integral component of membrane)	0	0	0	ENOG4111RKA(S:Function unknown); ENOG410YQSC(S:Function unknown); ENOG410ZFVZ(S:Function unknown); ENOG410Y65V(S:Function unknown)	ENOG4111RKA(Reverse transcriptase); ENOG410YQSC(reverse transcriptase); ENOG410ZFVZ(-); ENOG410Y65V(Retrotransposon protein)	0	0	114126314
gene-LOC114126311	yes|up	1	gene-LOC114126311	LOC114126311	tetra-peptide repeat homeobox protein 1-like	1087	1965	1148	378	2078	3216	1993	125.5	72.4	22.95	138.33	217.74	126.21	73.6167	160.76	2.8264	1.49896	0.00375328	0.0340132	yes	up	XP_027846030.1(tetra-peptide repeat homeobox protein 1-like [Aphis gossypii])	0	0	0	0	0	0	0	0	114126311
gene-LOC114130061	yes|down	1	gene-LOC114130061	LOC114130061	E3 SUMO-protein ligase PIAS2-like	2176	14	16	23	2	2	3	0.38	0.43	0.59	0.06	0.06	0.08	0.466667	0.0666667	0.17028	-2.55402	0.00181228	0.0193872	yes	down	XP_027850749.1(E3 SUMO-protein ligase PIAS2-like [Aphis gossypii])	0	K04706	PIAS1	map04120(Ubiquitin mediated proteolysis); map04630(JAK-STAT signaling pathway); map05160(Hepatitis C)	ENOG410XQ2E(S:Function unknown)	ENOG410XQ2E(Protein inhibitor of activated STAT)	PF14324.7(PINIT:PINIT domain); PF02891.21(zf-MIZ:MIZ/SP-RING zinc finger); PF11789.9(zf-Nse:Zinc-finger of the MIZ type in Nse subunit)	sp|O75925|PIAS1_HUMAN(E3 SUMO-protein ligase PIAS1 OS=Homo sapiens OX=9606 GN=PIAS1 PE=1 SV=2)	114130061
gene-LOC114130067	yes|down	1	gene-LOC114130067	LOC114130067	microtubule-associated serine/threonine-protein kinase 2-like, transcript variant X1	3224	279.76	347.29	405.57	97.43	107.92	70.19	4.86	5.99	6.73	1.77	2	1.22	5.86	1.66333	0.343789	-1.54041	4.74e-07	2.02e-05	yes	down	XP_027848405.1(microtubule-associated serine/threonine-protein kinase 2-like [Aphis gossypii])	0	K08789	MAST	0	ENOG410XPWX(T:Signal transduction mechanisms)	ENOG410XPWX(microtubule associated serine threonine kinase)	PF08926.12(DUF1908:Domain of unknown function (DUF1908)); PF00069.26(Pkinase:Protein kinase domain); PF07714.18(PK_Tyr_Ser-Thr:Protein tyrosine and serine/threonine kinase); PF14531.7(Kinase-like:Kinase-like)	sp|Q6P0Q8|MAST2_HUMAN(Microtubule-associated serine/threonine-protein kinase 2 OS=Homo sapiens OX=9606 GN=MAST2 PE=1 SV=2)	114130067
gene-LOC114124639	yes|down	1	gene-LOC114124639	LOC114124639	NADH dehydrogenase [ubiquinone] 1 alpha subcomplex subunit 2-like	618	776.06	580.09	648.44	0	16.03	49.4	106.98	78.34	84.33	0	2.61	7.49	89.8833	3.36667	0.0437514	-4.51453	0.00214592	0.022034	yes	down	XP_027843753.1(NADH dehydrogenase [ubiquinone] 1 alpha subcomplex subunit 2-like [Aphis gossypii])	0	K03946	NDUFA2	map04714(Thermogenesis); map00190(Oxidative phosphorylation); map05208(Chemical carcinogenesis - reactive oxygen species); map05012(Parkinson disease); map05010(Alzheimer disease); map04723(Retrograde endocannabinoid signaling); map05016(Huntington disease); map05014(Amyotrophic lateral sclerosis); map05415(Diabetic cardiomyopathy); map04932(Non-alcoholic fatty liver disease); map05022(Pathways o…	ENOG41124JV(I:Lipid transport and metabolism)	ENOG41124JV(Accessory subunit of the mitochondrial membrane respiratory chain NADH dehydrogenase (Complex I), that is believed not to be involved in catalysis. Complex I functions in the transfer of electrons from NADH to the respiratory chain. The immediate electron acceptor for the enzyme is believed to be ubiquinone)	PF05047.17(L51_S25_CI-B8:Mitochondrial ribosomal protein L51 / S25 / CI-B8 domain)	sp|P0CB79|NDUA2_PONAB(NADH dehydrogenase [ubiquinone] 1 alpha subcomplex subunit 2 OS=Pongo abelii OX=9601 GN=NDUFA2 PE=3 SV=1)	114124639
gene-LOC114124638	yes|up	1	gene-LOC114124638	LOC114124638	NADH dehydrogenase [ubiquinone] 1 alpha subcomplex subunit 2-like, transcript variant X2	621	547.94	666.91	748.56	1272	867.97	960.6	87.24	103.38	112.58	208.41	144.07	148.19	101.067	166.89	2.0189	1.01357	9.91e-06	0.000292319	yes	up	XP_027843753.1(NADH dehydrogenase [ubiquinone] 1 alpha subcomplex subunit 2-like [Aphis gossypii])	0	K03946	NDUFA2	map04714(Thermogenesis); map00190(Oxidative phosphorylation); map05208(Chemical carcinogenesis - reactive oxygen species); map05012(Parkinson disease); map05010(Alzheimer disease); map04723(Retrograde endocannabinoid signaling); map05016(Huntington disease); map05014(Amyotrophic lateral sclerosis); map05415(Diabetic cardiomyopathy); map04932(Non-alcoholic fatty liver disease); map05022(Pathways o…	ENOG41124JV(I:Lipid transport and metabolism)	ENOG41124JV(Accessory subunit of the mitochondrial membrane respiratory chain NADH dehydrogenase (Complex I), that is believed not to be involved in catalysis. Complex I functions in the transfer of electrons from NADH to the respiratory chain. The immediate electron acceptor for the enzyme is believed to be ubiquinone)	PF05047.17(L51_S25_CI-B8:Mitochondrial ribosomal protein L51 / S25 / CI-B8 domain)	sp|P0CB79|NDUA2_PONAB(NADH dehydrogenase [ubiquinone] 1 alpha subcomplex subunit 2 OS=Pongo abelii OX=9601 GN=NDUFA2 PE=3 SV=1)	114124638
gene-LOC114132065	yes|down	1	gene-LOC114132065	LOC114132065	peroxidase-like	2157	2194	2311	2355	678	462	325	59.68	62.31	61.09	19.29	13.41	8.83	61.0267	13.8433	0.273334	-1.87126	3.25e-12	3.89e-10	yes	down	XP_027853250.1(peroxidase-like [Aphis gossypii])	GO:0042600(cellular_component:chorion); GO:0004601(molecular_function:peroxidase activity); GO:0020037(molecular_function:heme binding); GO:0006979(biological_process:response to oxidative stress)	K19511	PXDN, VPO1	0	ENOG410XPZ3(S:Function unknown)	ENOG410XPZ3(prostaglandin G H synthase and cyclooxygenase)	PF03098.16(An_peroxidase:Animal haem peroxidase)	sp|Q01603|PERO_DROME(Peroxidase OS=Drosophila melanogaster OX=7227 GN=Pxd PE=2 SV=2)	114132065
gene-LOC114122930	yes|down	1	gene-LOC114122930	LOC114122930	uncharacterized LOC114122930	1713	102.94	281.49	305.27	32.96	35.64	66.11	3.68	9.98	10.41	1.23	1.36	2.36	8.02333	1.65	0.251026	-1.99409	0.000191681	0.00337053	yes	down	XP_027841542.1(uncharacterized protein LOC114122930 [Aphis gossypii])	GO:0016021(cellular_component:integral component of membrane)	0	0	0	ENOG410YMHR(G:Carbohydrate transport and metabolism); ENOG410ZKXE(S:Function unknown)	ENOG410YMHR(Major facilitator superfamily domain containing); ENOG410ZKXE(Nucleoside H+ symporter)	PF12832.8(MFS_1_like:MFS_1 like family); PF07690.17(MFS_1:Major Facilitator Superfamily)	0	114122930
gene-LOC114130488	yes|down	1	gene-LOC114130488	LOC114130488	uncharacterized LOC114130488	581	6	9	20	0	0	0	1.05	1.53	3.28	0	0	0	1.95333	0	0.0200552	-5.63988	0.000470378	0.00679566	yes	down	XP_027851271.1(uncharacterized protein LOC114130488 [Aphis gossypii])	0	0	0	0	0	0	0	0	114130488
gene-LOC114122422	yes|up	1	gene-LOC114122422	LOC114122422	uncharacterized LOC114122422	2600	10006	19710	7535	27390	36318	42779	382.39	747.63	282.56	1095.04	1483.75	1645.4	470.86	1408.06	3.74073	1.90332	3.16e-06	0.000108133	yes	up	XP_027840880.1(uncharacterized protein LOC114122422 [Aphis gossypii])	0	0	0	0	ENOG4111M7J(L:Replication, recombination and repair)	ENOG4111M7J(IstB domain protein ATP-binding protein)	0	0	114122422
gene-LOC114126536	yes|down	1	gene-LOC114126536	LOC114126536	homeobox protein unc-4-like	3404	692	470	579	164	148	306	11.32	7.63	9.04	2.81	2.58	5	9.33	3.46333	0.465846	-1.10208	0.00136879	0.0155852	yes	down	XP_027846308.1(homeobox protein unc-4-like [Aphis gossypii])	GO:0043565(molecular_function:sequence-specific DNA binding); GO:0005634(cellular_component:nucleus); GO:0006355(biological_process:regulation of transcription, DNA-templated)	K09328	UNC4	0	ENOG410YIJ3(S:Function unknown)	ENOG410YIJ3(,hydrolase)	PF00046.30(Homeodomain:Homeodomain)	sp|O77215|UNC4_DROME(Homeobox protein unc-4 OS=Drosophila melanogaster OX=7227 GN=unc-4 PE=2 SV=2)	114126536
gene-LOC114130088	yes|down	1	gene-LOC114130088	LOC114130088	ankyrin repeat and death domain-containing protein 1A-like	1636	120	97	81	36	19	19	4.54	3.63	2.92	1.42	0.76	0.72	3.69667	0.966667	0.320918	-1.63972	3.63e-06	0.000121848	yes	down	XP_027850781.1(ankyrin repeat and death domain-containing protein 1A-like [Aphis gossypii])	GO:0007165(biological_process:signal transduction)	0	0	0	COG0666(S:Function unknown)	COG0666(-)	PF13637.7(Ank_4:Ankyrin repeats (many copies)); PF12796.8(Ank_2:Ankyrin repeats (3 copies)); PF13857.7(Ank_5:Ankyrin repeats (many copies)); PF13606.7(Ank_3:Ankyrin repeat); PF00023.31(Ank:Ankyrin repeat); PF00531.23(Death:Death domain)	sp|Q14DN9|AKD1B_MOUSE(Ankyrin repeat and death domain-containing protein 1B OS=Mus musculus OX=10090 GN=Ankdd1b PE=2 SV=3)	114130088
gene-LOC114124222	yes|down	1	gene-LOC114124222	LOC114124222	ATP-dependent RNA helicase vasa-like	2135	151	159	139	56	54	43	4.33	4.35	3.66	1.62	1.59	1.22	4.11333	1.47667	0.442393	-1.1766	2.66e-06	9.31e-05	yes	down	XP_027843212.1(ATP-dependent RNA helicase vasa-like [Aphis gossypii])	GO:0003676(molecular_function:nucleic acid binding); GO:0005524(molecular_function:ATP binding)	K13982	DDX4, VASA	0	ENOG410XNTI(L:Replication, recombination and repair)	ENOG410XNTI(purine NTP-dependent helicase activity)	PF00270.30(DEAD:DEAD/DEAH box helicase); PF00271.32(Helicase_C:Helicase conserved C-terminal domain)	sp|P09052|VASA1_DROME(ATP-dependent RNA helicase vasa OS=Drosophila melanogaster OX=7227 GN=vas PE=1 SV=3)	114124222
gene-LOC114122029	yes|up	1	gene-LOC114122029	LOC114122029	growth/differentiation factor 11	1721	250	231	130	751	997	393	8.9	8.14	4.41	27.91	37.71	13.91	7.15	26.51	4.62861	2.21058	6.36e-08	3.37e-06	yes	up	XP_027840372.1(growth/differentiation factor 11, partial [Aphis gossypii])	GO:0005576(cellular_component:extracellular region); GO:0008083(molecular_function:growth factor activity)	K05497;K22679	MSTN, GDF8;GDF11	map04060(Cytokine-cytokine receptor interaction)	ENOG410XT8Z(O:Posttranslational modification, protein turnover, chaperones)	ENOG410XT8Z(bone morphogenetic protein)	PF00019.21(TGF_beta:Transforming growth factor beta like domain)	sp|O95390|GDF11_HUMAN(Growth/differentiation factor 11 OS=Homo sapiens OX=9606 GN=GDF11 PE=1 SV=1)	114122029
gene-LOC114130409	yes|up	1	gene-LOC114130409	LOC114130409	RNA-binding motif protein, X-linked 2-like, transcript variant X1	883	0	0	0	13.92	1.09	11.94	0	0	0	1.24	0.1	1.01	0	0.783333	61.6766	5.94665	0.00112167	0.0133532	yes	up	XP_027851192.1(RNA-binding motif protein, X-linked 2-like isoform X1 [Aphis gossypii])	GO:0003723(molecular_function:RNA binding)	K13107	RBMX2, IST3	0	ENOG4111KW0(S:Function unknown)	ENOG4111KW0(RNA binding motif protein X-linked 2)	PF00076.23(RRM_1:RNA recognition motif. (a.k.a. RRM, RBD, or RNP domain)); PF16367.6(RRM_7:RNA recognition motif)	sp|Q9Y388|RBMX2_HUMAN(RNA-binding motif protein, X-linked 2 OS=Homo sapiens OX=9606 GN=RBMX2 PE=1 SV=2)	114130409
gene-LOC114122719	yes|up	1	gene-LOC114122719	LOC114122719	uncharacterized LOC114122719	1117	96.74	78.4	86.62	151.89	136.88	126.69	5.95	4.77	5.07	9.75	8.93	7.73	5.26333	8.80333	2.06486	1.04604	1.2e-06	4.64e-05	yes	up	KAE9529094.1(hypothetical protein AGLY_012048 [Aphis glycines])	0	0	0	0	COG2940(S:Function unknown)	COG2940(Histone-lysine N-methyltransferase)	0	0	114122719
gene-LOC114122027	yes|down	1	gene-LOC114122027	LOC114122027	pyridine nucleotide-disulfide oxidoreductase domain-containing protein 1-like	1284	33.8	25.92	18.28	0	0	0	1.73	1.31	0.89	0	0	0	1.31	0	0.00929362	-6.74954	5.04e-07	2.13e-05	yes	down	XP_027840374.1(LOW QUALITY PROTEIN: pyridine nucleotide-disulfide oxidoreductase domain-containing protein 1-like, partial [Aphis gossypii])	GO:0003735(molecular_function:structural constituent of ribosome); GO:0005840(cellular_component:ribosome); GO:0006412(biological_process:translation); GO:0016491(molecular_function:oxidoreductase activity)	K24426	PYROXD1	0	COG0446(S:Function unknown); ENOG410XZAZ(S:Function unknown)	COG0446(pyridine nucleotide-disulfide oxidoreductase); ENOG410XZAZ(pyridine nucleotide-disulphide oxidoreductase domain 1)	PF07992.15(Pyr_redox_2:Pyridine nucleotide-disulphide oxidoreductase); PF18267.2(Rubredoxin_C:Rubredoxin NAD+ reductase C-terminal domain); PF13738.7(Pyr_redox_3:Pyridine nucleotide-disulphide oxidoreductase)	sp|Q5REJ2|PYRD1_PONAB(Pyridine nucleotide-disulfide oxidoreductase domain-containing protein 1 OS=Pongo abelii OX=9601 GN=PYROXD1 PE=2 SV=1)	114122027
gene-LOC114123513	yes|up	1	gene-LOC114123513	LOC114123513	tigger transposable element-derived protein 4-like	2281	4	5	4	20	12	16	0.1	0.13	0.1	0.53	0.33	0.41	0.11	0.423333	4.75547	2.24959	0.000712497	0.00941806	yes	up	XP_027842324.1(tigger transposable element-derived protein 4-like [Aphis gossypii])	0	0	0	0	ENOG4110CDI(S:Function unknown); ENOG4111HEV(S:Function unknown)	ENOG4110CDI(tigger transposable element derived); ENOG4111HEV(MYND finger)	PF03184.20(DDE_1:DDE superfamily endonuclease); PF03221.17(HTH_Tnp_Tc5:Tc5 transposase DNA-binding domain); PF04218.14(CENP-B_N:CENP-B N-terminal DNA-binding domain)	sp|Q8BUZ3|TIGD4_MOUSE(Tigger transposable element-derived protein 4 OS=Mus musculus OX=10090 GN=Tigd4 PE=2 SV=1)	114123513
gene-LOC114123047	yes|down	1	gene-LOC114123047	LOC114123047	hyaluronidase-like	1783	304	370	325	111	74	98	10.59	12.86	10.79	4.03	2.73	3.38	11.4133	3.38	0.36455	-1.45581	4.53e-10	3.61e-08	yes	down	XP_027841697.1(hyaluronidase-like [Aphis gossypii])	GO:0004415(molecular_function:hyalurononglucosaminidase activity); GO:0006952(biological_process:defense response); GO:0005975(biological_process:carbohydrate metabolic process)	K01197	hya	map04142(Lysosome); map00531(Glycosaminoglycan degradation)	ENOG410XPZT(G:Carbohydrate transport and metabolism)	ENOG410XPZT(hyaluronoglucosaminidase)	PF01630.19(Glyco_hydro_56:Hyaluronidase)	sp|Q08169|HUGA_APIME(Hyaluronidase OS=Apis mellifera OX=7460 PE=1 SV=1)	114123047
gene-LOC114125981	yes|up	1	gene-LOC114125981	LOC114125981	bifunctional lycopene cyclase/phytoene synthase-like	1219	336.16	231.16	196.82	697.03	756.58	704.37	15.28	10.88	8.63	31.29	33.16	30.21	11.5967	31.5533	3.72489	1.8972	9.71e-17	2.19e-14	yes	up	XP_027845622.1(bifunctional lycopene cyclase/phytoene synthase-like [Aphis gossypii])	GO:0016021(cellular_component:integral component of membrane); GO:0009058(biological_process:biosynthetic process); GO:0004310(molecular_function:farnesyl-diphosphate farnesyltransferase activity); GO:0016740(molecular_function:transferase activity); GO:0051996(molecular_function:squalene synthase activity); GO:0016872(molecular_function:intramolecular lyase activity)	K17841	AL2	0	COG1562(I:Lipid transport and metabolism)	COG1562(phytoene synthase)	PF00494.20(SQS_PSY:Squalene/phytoene synthase)	sp|Q67GH9|LCPS_BLATR(Bifunctional lycopene cyclase/phytoene synthase OS=Blakeslea trispora OX=4850 GN=carRA PE=1 SV=1)	114125981
gene-LOC114125654	yes|up	1	gene-LOC114125654	LOC114125654	uncharacterized LOC114125654	1346	1212	1048	267	2522	2986	1736	56.65	49.02	11.88	110.45	128.72	72.52	39.1833	103.897	3.81739	1.93259	0.000119213	0.00228491	yes	up	XP_027845207.1(uncharacterized protein LOC114125654 [Aphis gossypii])	0	0	0	0	ENOG4111PCZ(S:Function unknown)	ENOG4111PCZ(-)	PF00379.24(Chitin_bind_4:Insect cuticle protein)	0	114125654
gene-LOC114123514	yes|down	1	gene-LOC114123514	LOC114123514	otolith matrix protein OMM-64-like	1069	570	857	701	322	201	190	37.24	55.29	43.53	21.93	13.92	12.31	45.3533	16.0533	0.426839	-1.22823	1.67e-05	0.000451585	yes	down	XP_027842325.1(otolith matrix protein OMM-64-like [Aphis gossypii])	0	0	0	0	0	0	PF16470.6(S8_pro-domain:Peptidase S8 pro-domain)	0	114123514
gene-LOC114122113	yes|up	1	gene-LOC114122113	LOC114122113	uncharacterized LOC114122113, transcript variant X2	1232	1	0	6	19	28	15	0.05	0	0.31	1.08	1.61	0.81	0.12	1.16667	11.4212	3.51365	0.000438972	0.00648033	yes	up	0	0	0	0	0	0	0	0	0	114122113
gene-LOC114127290	yes|down	1	gene-LOC114127290	LOC114127290	probable serine/threonine-protein kinase DDB_G0282963	1991	3505	6470	5674	1058	780	779	104.91	191.94	161.99	33.1	24.85	23.25	152.947	27.0667	0.213027	-2.23089	1.48e-13	2.24e-11	yes	down	XP_027847285.1(probable serine/threonine-protein kinase DDB_G0282963 [Aphis gossypii])	0	0	0	0	0	0	0	0	114127290
gene-LOC114127291	yes|down	1	gene-LOC114127291	LOC114127291	uncharacterized protein MAL13P1.304-like	2136	1159	1979	1918	667	511	540	31.97	54.11	50.47	19.23	15.01	14.85	45.5167	16.3633	0.433664	-1.20535	3.26e-05	0.000795859	yes	down	XP_027847286.1(uncharacterized protein MAL13P1.304-like [Aphis gossypii])	0	0	0	0	0	0	0	0	114127291
gene-LOC114120963	yes|down	1	gene-LOC114120963	LOC114120963	anaphase-promoting complex subunit 10, transcript variant X1	1671	549	518	523	131	152	241	20.6	19.29	18.8	5.05	5.97	8.85	19.5633	6.62333	0.431905	-1.21121	5.28e-05	0.00115975	yes	down	KAF0770933.1(anaphase-promoting complex subunit 10 isoform X1, partial [Aphis craccivora])	GO:0005680(cellular_component:anaphase-promoting complex); GO:0007049(biological_process:cell cycle); GO:0031145(biological_process:anaphase-promoting complex-dependent catabolic process); GO:0051301(biological_process:cell division)	K03357	APC10, ANAPC10, DOC1	map04110(Cell cycle); map04914(Progesterone-mediated oocyte maturation); map04114(Oocyte meiosis); map05166(Human T-cell leukemia virus 1 infection); map04120(Ubiquitin mediated proteolysis)	COG5156(D:Cell cycle control, cell division, chromosome partitioning); COG5156(O:Posttranslational modification, protein turnover, chaperones)	COG5156(complex subunit 10); COG5156(complex subunit 10)	PF03256.17(ANAPC10:Anaphase-promoting complex, subunit 10 (APC10))	sp|Q9V831|APC10_DROME(Anaphase-promoting complex subunit 10 OS=Drosophila melanogaster OX=7227 GN=APC10 PE=2 SV=2)	114120963
gene-LOC114131542	yes|up	1	gene-LOC114131542	LOC114131542	uncharacterized LOC114131542	482	1	2	1	11	5	13	0.26	0.51	0.24	2.97	1.36	3.29	0.336667	2.54	9.32561	3.2212	0.00238808	0.0238808	yes	up	KAE9537949.1(hypothetical protein AGLY_005921 [Aphis glycines])	GO:0004177(molecular_function:aminopeptidase activity); GO:0008270(molecular_function:zinc ion binding); GO:0008237(molecular_function:metallopeptidase activity)	K11140	ANPEP, CD13	map04640(Hematopoietic cell lineage); map00480(Glutathione metabolism); map04614(Renin-angiotensin system)	COG0308(E:Amino acid transport and metabolism)	COG0308(aminopeptidase)	PF17900.2(Peptidase_M1_N:Peptidase M1 N-terminal domain)	0	114131542
gene-LOC114130965	yes|up	1	gene-LOC114130965	LOC114130965	nuclear receptor subfamily 4 group A member 2-like, transcript variant X1	3372	598	256.16	230	745.25	1153.24	448.75	9.84	4.16	3.56	12.84	20.25	7.33	5.85333	13.4733	2.91561	1.5438	0.000961257	0.0118993	yes	up	XP_027851871.1(nuclear receptor subfamily 4 group A member 2-like isoform X1 [Aphis gossypii])	0	K08558	NR4A2, NURR1	map04928(Parathyroid hormone synthesis, secretion and action); map04925(Aldosterone synthesis and secretion)	ENOG410YWNC(K:Transcription)	ENOG410YWNC(Nuclear receptor subfamily 4, group A, member)	PF00105.19(zf-C4:Zinc finger, C4 type (two domains)); PF00104.31(Hormone_recep:Ligand-binding domain of nuclear hormone receptor)	sp|P49870|HR38_BOMMO(Probable nuclear hormone receptor HR38 (Fragment) OS=Bombyx mori OX=7091 GN=HR38 PE=2 SV=1)	114130965
gene-LOC114130962	yes|up	1	gene-LOC114130962	LOC114130962	UPF0183 protein CG7083-like	1463	0	0	0	20.07	28.87	6.93	0	0	0	0.91	1.33	0.3	0	0.846667	132.959	7.05484	1.9e-06	6.95e-05	yes	up	XP_027851866.1(UPF0183 protein CG7083-like [Aphis gossypii])	0	0	0	0	ENOG410XT40(S:Function unknown)	ENOG410XT40(Chromosome 16 open reading frame 70)	PF03676.15(UPF0183:Uncharacterised protein family (UPF0183))	sp|Q9VSH9|U183_DROME(UPF0183 protein CG7083 OS=Drosophila melanogaster OX=7227 GN=CG7083 PE=2 SV=1)	114130962
gene-LOC114131546	yes|up	1	gene-LOC114131546	LOC114131546	homeobox protein E60-like	478	15.51	3.18	7.97	45.36	36.83	27.2	2.6	0.16	0.38	5.59	7.46	5.6	1.04667	6.21667	5.30783	2.40812	6.91e-05	0.00147093	yes	up	XP_027852598.1(homeobox protein E60-like, partial [Aphis gossypii])	GO:0043565(molecular_function:sequence-specific DNA binding); GO:0005634(cellular_component:nucleus); GO:0007275(biological_process:multicellular organism development); GO:0006355(biological_process:regulation of transcription, DNA-templated)	K09319	EN	map04341(Hedgehog signaling pathway - fly)	ENOG4111P06(K:Transcription)	ENOG4111P06(engrailed homeobox)	PF00046.30(Homeodomain:Homeodomain); PF10525.10(Engrail_1_C_sig:Engrailed homeobox C-terminal signature domain)	sp|P09075|HME60_APIME(Homeobox protein E60 (Fragment) OS=Apis mellifera OX=7460 PE=3 SV=3)	114131546
gene-LOC114127883	yes|down	1	gene-LOC114127883	LOC114127883	uncharacterized LOC114127883, transcript variant X1	636	74	98	77	37	21	24	10.88	14.1	10.67	5.63	3.24	3.47	11.8833	4.11333	0.422248	-1.24384	0.000441253	0.00650566	yes	down	KAF0768731.1(U8-agatoxin-Ao1a [Aphis craccivora])	GO:0009405(biological_process:pathogenesis); GO:0005576(cellular_component:extracellular region); GO:0008200(molecular_function:ion channel inhibitor activity)	0	0	0	ENOG410Y2Z6(S:Function unknown)	ENOG410Y2Z6(-)	PF02819.16(Toxin_9:Spider toxin); PF05039.13(Agouti:Agouti protein)	sp|Q5Y4U4|TX20A_AGEOR(U8-agatoxin-Ao1a OS=Agelena orientalis OX=293813 PE=2 SV=1)	114127883
gene-LOC114123997	yes|down	1	gene-LOC114123997	LOC114123997	uncharacterized LOC114123997	1556	424	436	838	255	225	161	17.05	17.36	32.11	10.71	9.62	6.44	22.1733	8.92333	0.482082	-1.05265	0.00485372	0.0410425	yes	down	XP_027842955.1(uncharacterized protein LOC114123997 [Aphis gossypii])	GO:0016021(cellular_component:integral component of membrane)	0	0	0	0	0	0	0	114123997
gene-LOC114130883	yes|down	1	gene-LOC114130883	LOC114130883	RING finger protein 207-like	3139	356	271	168	112	80	78	6.36	4.81	2.87	2.09	1.52	1.39	4.68	1.66667	0.443772	-1.17211	0.000172889	0.0030873	yes	down	XP_027851756.1(RING finger protein 207-like [Aphis gossypii])	GO:0030544(molecular_function:Hsp70 protein binding); GO:0008270(molecular_function:zinc ion binding)	0	0	0	ENOG410XRSW(S:Function unknown)	ENOG410XRSW(Ring finger protein 207)	PF00643.25(zf-B_box:B-box zinc finger); PF00097.26(zf-C3HC4:Zinc finger, C3HC4 type (RING finger)); PF10046.10(BLOC1_2:Biogenesis of lysosome-related organelles complex-1 subunit 2); PF13920.7(zf-C3HC4_3:Zinc finger, C3HC4 type (RING finger)); PF13923.7(zf-C3HC4_2:Zinc finger, C3HC4 type (RING finger)); PF13445.7(zf-RING_UBOX:RING-type zinc-finger)	sp|E9QHE3|RN207_DANRE(RING finger protein 207 OS=Danio rerio OX=7955 GN=rnf207b PE=3 SV=1)	114130883
gene-LOC114127500	yes|down	1	gene-LOC114127500	LOC114127500	sodium channel protein Nach-like	1965	33	29	22	2	0	3	1	0.87	0.64	0.06	0	0.09	0.836667	0.05	0.0772821	-3.69372	1.48e-05	0.000408029	yes	down	XP_027847547.1(sodium channel protein Nach-like [Aphis gossypii])	GO:0016021(cellular_component:integral component of membrane); GO:0005272(molecular_function:sodium channel activity)	K03440	ASICN	0	ENOG410ZNFK(S:Function unknown)	ENOG410ZNFK(acid-sensing (proton-gated) ion channel)	PF00858.25(ASC:Amiloride-sensitive sodium channel)	sp|O61365|NACH_DROME(Sodium channel protein Nach OS=Drosophila melanogaster OX=7227 GN=Nach PE=2 SV=2)	114127500
gene-LOC114126740	yes|down	1	gene-LOC114126740	LOC114126740	uncharacterized LOC114126740	4691	2196.52	1641.46	1153.79	715.45	565.11	510.82	23.51	17.61	11.71	8.18	6.35	5.46	17.61	6.66333	0.469304	-1.0914	9.86e-06	0.000291477	yes	down	XP_027846549.1(uncharacterized protein LOC114126740 [Aphis gossypii])	0	0	0	0	ENOG410ZRC5(S:Function unknown)	ENOG410ZRC5(WD40)	PF00400.33(WD40:WD domain, G-beta repeat); PF05729.13(NACHT:NACHT domain); PF13401.7(AAA_22:AAA domain); PF13479.7(AAA_24:AAA domain); PF13191.7(AAA_16:AAA ATPase domain); PF00004.30(AAA:ATPase family associated with various cellular activities (AAA))	0	114126740
gene-LOC114130310	yes|down	1	gene-LOC114130310	LOC114130310	uncharacterized LOC114130310	760	455	867.55	727.88	234	120	76	50.94	99.84	80.04	30.08	14.66	8.1	76.94	17.6133	0.262982	-1.92696	1.24e-05	0.000351521	yes	down	XP_027851058.1(uncharacterized protein LOC114130310 [Aphis gossypii])	GO:0016021(cellular_component:integral component of membrane)	0	0	0	0	0	0	0	114130310
gene-LOC114125188	yes|down	1	gene-LOC114125188	LOC114125188	uncharacterized LOC114125188	824	93	129	64	34	11	14	8.86	12.1	5.78	3.37	1.11	1.32	8.91333	1.93333	0.261854	-1.93317	0.00013246	0.00250541	yes	down	XP_027844530.1(uncharacterized protein LOC114125188 [Aphis gossypii])	0	0	0	0	0	0	0	0	114125188
gene-LOC114130319	yes|up	1	gene-LOC114130319	LOC114130319	ring canal kelch homolog, transcript variant X3	2225	24.01	44	31.99	376.51	283.92	318.73	0.66	1.18	0.84	10.39	7.93	8.51	0.893333	8.94333	12.5991	3.65525	4.86e-36	5.08e-33	yes	up	XP_027851068.1(ring canal kelch homolog [Aphis gossypii])	0	K10443;K10448	KLHL2_3;KLHL10	0	ENOG410XNX8(S:Function unknown)	ENOG410XNX8(kelch-like)	PF01344.26(Kelch_1:Kelch motif); PF07707.16(BACK:BTB And C-terminal Kelch); PF00651.32(BTB:BTB/POZ domain); PF13964.7(Kelch_6:Kelch motif); PF07646.16(Kelch_2:Kelch motif); PF13418.7(Kelch_4:Galactose oxidase, central domain); PF13415.7(Kelch_3:Galactose oxidase, central domain); PF11822.9(DUF3342:Domain of unknown function (DUF3342))	sp|Q70JS2|KELC_ANOST(Ring canal kelch homolog OS=Anopheles stephensi OX=30069 GN=kel PE=2 SV=2)	114130319
gene-LOC114132462	yes|up	1	gene-LOC114132462	LOC114132462	carbohydrate sulfotransferase 11-like	866	58	32	14	92	108	66	5.12	2.78	1.17	8.46	10.09	5.76	3.02333	8.10333	3.41616	1.77238	0.000474669	0.00682355	yes	up	XP_027853724.1(carbohydrate sulfotransferase 11-like, partial [Aphis gossypii])	GO:0016021(cellular_component:integral component of membrane); GO:0000139(cellular_component:Golgi membrane); GO:0008146(molecular_function:sulfotransferase activity); GO:0016051(biological_process:carbohydrate biosynthetic process)	K01017	CHST11	map00532(Glycosaminoglycan biosynthesis - chondroitin sulfate / dermatan sulfate)	ENOG4111GJR(S:Function unknown)	ENOG4111GJR(carbohydrate)	PF03567.15(Sulfotransfer_2:Sulfotransferase family)	sp|Q9JME2|CHSTB_MOUSE(Carbohydrate sulfotransferase 11 OS=Mus musculus OX=10090 GN=Chst11 PE=2 SV=1)	114132462
gene-LOC114129902	yes|down	1	gene-LOC114129902	LOC114129902	fatty acyl-CoA reductase wat-like	2014	72.29	109	73.35	21.01	27.02	29.4	2.29	3.26	2.07	0.67	0.86	0.88	2.54	0.803333	0.394718	-1.34111	0.000534442	0.00756907	yes	down	XP_027850562.1(fatty acyl-CoA reductase wat-like [Aphis gossypii])	GO:0102965(molecular_function:alcohol-forming fatty acyl-CoA reductase activity); GO:0016021(cellular_component:integral component of membrane); GO:0080019(molecular_function:fatty-acyl-CoA reductase (alcohol-forming) activity); GO:0006629(biological_process:lipid metabolic process)	K13356	FAR	map04146(Peroxisome); map04212(Longevity regulating pathway - worm)	ENOG410XS7R(S:Function unknown)	ENOG410XS7R(fatty-acyl-CoA reductase (alcohol-forming) activity)	PF07993.13(NAD_binding_4:Male sterility protein); PF03015.20(Sterile:Male sterility protein); PF01370.22(Epimerase:NAD dependent epimerase/dehydratase family); PF01073.20(3Beta_HSD:3-beta hydroxysteroid dehydrogenase/isomerase family); PF16363.6(GDP_Man_Dehyd:GDP-mannose 4,6 dehydratase); PF02719.16(Polysacc_synt_2:Polysaccharide biosynthesis protein); PF08659.11(KR:KR domain)	sp|Q8MS59|WAT_DROME(Fatty acyl-CoA reductase wat OS=Drosophila melanogaster OX=7227 GN=wat PE=1 SV=1)	114129902
gene-LOC114129903	yes|up	1	gene-LOC114129903	LOC114129903	fatty acyl-CoA reductase wat-like	2054	180.71	17	67.65	1924.27	3061.7	878.62	5.22	0.49	1.86	58.06	94.08	25.29	2.52333	59.1433	30.0441	4.90901	6e-12	6.45e-10	yes	up	XP_027850563.1(fatty acyl-CoA reductase wat-like [Aphis gossypii])	GO:0102965(molecular_function:alcohol-forming fatty acyl-CoA reductase activity); GO:0016021(cellular_component:integral component of membrane); GO:0080019(molecular_function:fatty-acyl-CoA reductase (alcohol-forming) activity); GO:0006629(biological_process:lipid metabolic process)	K13356	FAR	map04146(Peroxisome); map04212(Longevity regulating pathway - worm)	ENOG410XS7R(S:Function unknown)	ENOG410XS7R(fatty-acyl-CoA reductase (alcohol-forming) activity)	PF07993.13(NAD_binding_4:Male sterility protein); PF03015.20(Sterile:Male sterility protein); PF01073.20(3Beta_HSD:3-beta hydroxysteroid dehydrogenase/isomerase family); PF01370.22(Epimerase:NAD dependent epimerase/dehydratase family); PF02719.16(Polysacc_synt_2:Polysaccharide biosynthesis protein); PF09732.10(CactinC_cactus:Cactus-binding C-terminus of cactin protein)	sp|Q8MS59|WAT_DROME(Fatty acyl-CoA reductase wat OS=Drosophila melanogaster OX=7227 GN=wat PE=1 SV=1)	114129903
gene-LOC114124529	yes|up	1	gene-LOC114124529	LOC114124529	uncharacterized LOC114124529	3255	1	5	1	10	11	12	0.02	0.09	0.02	2.22	2.72	2.75	0.0433333	2.56333	6.11311	2.61191	0.00521626	0.0433432	yes	up	XP_027843611.1(uncharacterized protein LOC114124529 [Aphis gossypii])	GO:0038023(molecular_function:signaling receptor activity)	0	0	0	ENOG4111VG4(U:Intracellular trafficking, secretion, and vesicular transport); ENOG410ZRS6(S:Function unknown)	ENOG4111VG4(GDNF family receptor alpha); ENOG410ZRS6(-)	PF02351.17(GDNF:GDNF/GAS1 domain)	0	114124529
gene-LOC114120412	yes|down	1	gene-LOC114120412	LOC114120412	uncharacterized LOC114120412, transcript variant X2	342	12478	32088	37917.8	5162	5516	6933	6455.91	17075.7	19851.5	2797.83	2933.43	3570.41	14461	3100.56	0.272787	-1.87415	2.05e-05	0.00053642	yes	down	XP_027838104.1(uncharacterized protein LOC114120412 isoform X1 [Aphis gossypii])	0	0	0	0	0	0	0	0	114120412
gene-LOC114124523	yes|down	1	gene-LOC114124523	LOC114124523	uncharacterized LOC114124523, transcript variant X1	1379	65	107	77	36	31	27	6.84	9.1	5.46	1.95	3.27	2.62	7.13333	2.61333	0.485947	-1.04113	0.00466153	0.0399522	yes	down	XP_027843601.1(uncharacterized protein LOC114124523 isoform X1 [Aphis gossypii])	GO:0016021(cellular_component:integral component of membrane)	0	0	0	0	0	0	0	114124523
gene-LOC114127686	yes|up	1	gene-LOC114127686	LOC114127686	uncharacterized LOC114127686, transcript variant X2	1691	2889	1646.39	1196	6828.15	3566	2266.36	105.1	59.26	41.49	259.71	137.51	81.92	68.6167	159.713	2.86053	1.51628	0.000372008	0.00572703	yes	up	XP_027847803.1(uncharacterized protein LOC114127686 [Aphis gossypii])	0	0	0	0	ENOG41123CP(S:Function unknown)	ENOG41123CP(-)	0	0	114127686
gene-LOC114130705	yes|up	1	gene-LOC114130705	LOC114130705	protein takeout-like	1289	534	774	285	782	1069	1085	27.21	39	13.82	41.58	57.84	54.94	26.6767	51.4533	2.42945	1.28063	0.0010397	0.0126391	yes	up	XP_027851538.1(protein takeout-like [Aphis gossypii])	0	0	0	0	ENOG4111MH9(K:Transcription)	ENOG4111MH9(general transcription factor IIE, polypeptide 2, beta 34kDa)	PF06585.12(JHBP:Haemolymph juvenile hormone binding protein (JHBP))	sp|Q9VBV3|TAKT_DROME(Protein takeout OS=Drosophila melanogaster OX=7227 GN=to PE=2 SV=1)	114130705
gene-LOC114125240	yes|down	1	gene-LOC114125240	LOC114125240	uncharacterized LOC114125240	368	135.1	219.74	166.53	27.9	16.56	21.51	2.05	4.36	2.63	0.92	0.21	1.86	3.01333	0.996667	0.164285	-2.60573	1.44e-12	1.91e-10	yes	down	0	0	0	0	0	0	0	0	0	114125240
gene-LOC114123901	yes|up	1	gene-LOC114123901	LOC114123901	lipase member H-A-like	941	429	852	1173	3035	1507	1467	33.54	65.68	87.04	247.04	124.68	113.47	62.0867	161.73	3.05312	1.61028	0.000282515	0.00459897	yes	up	XP_027842839.1(lipase member H-A-like [Aphis gossypii])	GO:0016021(cellular_component:integral component of membrane); GO:0005576(cellular_component:extracellular region); GO:0006629(biological_process:lipid metabolic process); GO:0052689(molecular_function:carboxylic ester hydrolase activity)	K14075;K14074	PNLIPRP2, PLRP2;PNLIPRP1, PLRP1	map04972(Pancreatic secretion); map00561(Glycerolipid metabolism); map04975(Fat digestion and absorption)	ENOG410YGS3(S:Function unknown); ENOG4111AHY(O:Posttranslational modification, protein turnover, chaperones)	ENOG410YGS3(pancreatic triacylglycerol lipase); ENOG4111AHY(lipase member)	PF00151.20(Lipase:Lipase); PF00561.21(Abhydrolase_1:alpha/beta hydrolase fold); PF12697.8(Abhydrolase_6:Alpha/beta hydrolase family)	sp|Q6PA23|LIPHA_XENLA(Lipase member H-A OS=Xenopus laevis OX=8355 GN=liph-a PE=2 SV=1)	114123901
gene-LOC114125575	yes|up	1	gene-LOC114125575	LOC114125575	acetyl-coenzyme A transporter 1-like	1918	44.18	43.13	53.65	64.22	83.64	74.75	1.38	1.34	1.6	2.1	2.78	2.33	1.44	2.40333	2.06431	1.04566	0.00135464	0.0155262	yes	up	XP_027845092.1(acetyl-coenzyme A transporter 1-like [Aphis gossypii])	GO:0008521(molecular_function:acetyl-CoA transporter activity); GO:0016021(cellular_component:integral component of membrane)	K03372	SLC33A1, ACATN	map00604(Glycosphingolipid biosynthesis - ganglio series)	COG0477(G:Carbohydrate transport and metabolism)	COG0477(major facilitator Superfamily)	PF13000.8(Acatn:Acetyl-coenzyme A transporter 1)	sp|O00400|ACATN_HUMAN(Acetyl-coenzyme A transporter 1 OS=Homo sapiens OX=9606 GN=SLC33A1 PE=1 SV=1)	114125575
gene-LOC114122687	yes|down	1	gene-LOC114122687	LOC114122687	RNA exonuclease 4-like	832	13	25	32	0	0	5	1.22	2.31	2.85	0	0	0.46	2.12667	0.153333	0.0922558	-3.43822	0.00400545	0.0356522	yes	down	XP_027841228.1(RNA exonuclease 4-like [Aphis gossypii])	GO:0008408(molecular_function:3'-5' exonuclease activity); GO:0006364(biological_process:rRNA processing); GO:0003676(molecular_function:nucleic acid binding)	K18327	REXO4, REX4	0	COG0847(L:Replication, recombination and repair)	COG0847(DNA polymerase iii)	PF00929.25(RNase_T:Exonuclease); PF01612.21(DNA_pol_A_exo1:3'-5' exonuclease)	sp|Q6DEW6|REXO4_XENTR(RNA exonuclease 4 OS=Xenopus tropicalis OX=8364 GN=rexo4 PE=2 SV=1)	114122687
gene-LOC114125573	yes|down	1	gene-LOC114125573	LOC114125573	aldehyde dehydrogenase-like, transcript variant X1	1640	5119	6515	10691	2592	1734	2240	184.6	232.11	368.43	96.52	65.72	80.2	261.713	80.8133	0.373375	-1.4213	2.86e-05	0.000718536	yes	down	XP_027845089.1(aldehyde dehydrogenase-like isoform X1 [Aphis gossypii])	GO:0016620(molecular_function:oxidoreductase activity, acting on the aldehyde or oxo group of donors, NAD or NADP as acceptor)	K00128	ALDH	map00310(Lysine degradation); map00561(Glycerolipid metabolism); map00280(Valine, leucine and isoleucine degradation); map00981(Insect hormone biosynthesis); map01240(Biosynthesis of cofactors); map00340(Histidine metabolism); map00330(Arginine and proline metabolism); map00053(Ascorbate and aldarate metabolism); map00380(Tryptophan metabolism); map00010(Glycolysis / Gluconeogenesis); map00620(Py…	COG1012(C:Energy production and conversion)	COG1012(Dehydrogenase)	PF00171.23(Aldedh:Aldehyde dehydrogenase family)	sp|Q27640|ALDH_ENCBU(Aldehyde dehydrogenase OS=Enchytraeus buchholzi OX=34589 GN=ALDH PE=2 SV=1)	114125573
gene-LOC114131799	yes|up	1	gene-LOC114131799	LOC114131799	cathepsin B-like cysteine proteinase 4	378	142	196	279	665	628	715	73.06	96.27	132.37	353.15	334.37	349.54	100.567	345.687	4.17775	2.06273	1.02e-10	9.51e-09	yes	up	XP_027852904.1(cathepsin B-like cysteine proteinase 4, partial [Aphis gossypii])	GO:0004197(molecular_function:cysteine-type endopeptidase activity); GO:0008234(molecular_function:cysteine-type peptidase activity); GO:0050790(biological_process:regulation of catalytic activity)	K01363	CTSB	map04142(Lysosome); map04621(NOD-like receptor signaling pathway); map04924(Renin secretion); map04210(Apoptosis); map04612(Antigen processing and presentation); map04140(Autophagy - animal)	COG4870(O:Posttranslational modification, protein turnover, chaperones)	COG4870(cathepsin)	PF00112.24(Peptidase_C1:Papain family cysteine protease)	sp|P43508|CPR4_CAEEL(Cathepsin B-like cysteine proteinase 4 OS=Caenorhabditis elegans OX=6239 GN=cpr-4 PE=1 SV=1)	114131799
gene-LOC114123863	yes|up	1	gene-LOC114123863	LOC114123863	0	703	2	4	3	7	12	49	0.12	0.48	0.35	0.31	1.13	4.11	0.316667	1.85	9.92729	3.3114	0.000864944	0.0109559	yes	up	XP_025421535.1(uncharacterized protein LOC112691484 [Sipha flava])	0	0	0	0	0	0	0	0	114123863
gene-LOC114126473	yes|up	1	gene-LOC114126473	LOC114126473	ribonuclease E-like	810	0	0	0	26	37	18	0	0	0	2.64	3.82	1.74	0	2.73333	192.413	7.58806	1.57e-08	9.54e-07	yes	up	XP_027846228.1(uncharacterized protein LOC114126473 [Aphis gossypii])	0	0	0	0	0	0	0	0	114126473
gene-LOC114132682	yes|up	1	gene-LOC114132682	LOC114132682	uncharacterized LOC114132682	1150	58.02	19.98	29.22	51.65	65.01	98.52	3.43	1.17	1.64	3.19	4.08	5.79	2.08	4.35333	2.69876	1.4323	0.00372704	0.033861	yes	up	KAE9523825.1(hypothetical protein AGLY_015713 [Aphis glycines])	0	K02156	AUB, PIWI	map04320(Dorso-ventral axis formation)	0	0	0	0	114132682
gene-LOC114128233	yes|down	1	gene-LOC114128233	LOC114128233	uncharacterized LOC114128233	384	136.44	139.03	142.64	25.98	61.18	29.6	56.14	59.19	53.84	7.31	21.51	8.52	56.39	12.4467	0.369955	-1.43458	0.000738863	0.0096776	yes	down	XP_015380281.1(PREDICTED: 40S ribosomal protein S15Ab-like [Diuraphis noxia])	GO:0004930(molecular_function:G-protein coupled receptor activity); GO:0009881(molecular_function:photoreceptor activity); GO:0022627(cellular_component:cytosolic small ribosomal subunit); GO:0016021(cellular_component:integral component of membrane); GO:0007601(biological_process:visual perception); GO:0018298(biological_process:protein-chromophore linkage); GO:0007602(biological_process:phototr…	K02957	RP-S15Ae, RPS15A	map03010(Ribosome); map05171(Coronavirus disease - COVID-19)	COG0096(J:Translation, ribosomal structure and biogenesis)	COG0096(One of the primary rRNA binding proteins, it binds directly to 16S rRNA central domain where it helps coordinate assembly of the platform of the 30S subunit (By similarity))	0	sp|Q76I82|RS15A_BOVIN(40S ribosomal protein S15a OS=Bos taurus OX=9913 GN=RPS15A PE=2 SV=1)	114128233
gene-LOC114132687	yes|down	1	gene-LOC114132687	LOC114132687	DNA ligase 1-like, transcript variant X1	1991	1413.76	2107.86	1624.26	941.45	569.53	259.42	33.74	50.15	37.54	23.6	13.76	6.23	40.4767	14.53	0.435343	-1.19978	0.00534929	0.044035	yes	down	XP_027854012.1(dentin sialophosphoprotein-like isoform X1 [Aphis gossypii])	0	0	0	0	0	0	0	0	114132687
gene-LOC114125471	yes|up	1	gene-LOC114125471	LOC114125471	cuticle protein 16.5-like	654	12890	8211	2605	23052	17846	11923	1801.22	1123.9	343.37	3336.75	2619.75	1632.34	1089.5	2529.61	2.94698	1.55924	0.00169955	0.0184038	yes	up	XP_027844937.1(cuticle protein 16.5-like [Aphis gossypii])	0	0	0	0	ENOG410Z4TZ(S:Function unknown)	ENOG410Z4TZ(-)	0	0	114125471
gene-LOC114129348	yes|up	1	gene-LOC114129348	LOC114129348	putative nuclease HARBI1	1253	0	0	0	34	20	32	0	0	0	1.88	1.12	1.68	0	1.56	200.887	7.65024	4.24e-09	2.83e-07	yes	up	XP_027849864.1(putative nuclease HARBI1 [Aphis gossypii])	0	0	0	0	ENOG411206Y(S:Function unknown); ENOG4111CM4(S:Function unknown)	ENOG411206Y(transposon protein); ENOG4111CM4(-)	PF13359.7(DDE_Tnp_4:DDE superfamily endonuclease); PF04827.15(Plant_tran:Plant transposon protein); PF01609.22(DDE_Tnp_1:Transposase DDE domain)	sp|Q17QR8|HARB1_BOVIN(Putative nuclease HARBI1 OS=Bos taurus OX=9913 GN=HARBI1 PE=2 SV=1)	114129348
gene-LOC114132966	yes|up	1	gene-LOC114132966	LOC114132966	uncharacterized LOC114132966	3735	249	131	96	236	287	205	3.68	1.92	1.36	3.65	4.52	3.03	2.32	3.73333	2.0406	1.02899	0.00556832	0.0453444	yes	up	XP_027854377.1(uncharacterized protein LOC114132966 [Aphis gossypii])	GO:0016021(cellular_component:integral component of membrane)	0	0	0	ENOG410XTAH(S:Function unknown)	ENOG410XTAH(regulation of biological quality)	PF00024.27(PAN_1:PAN domain); PF08277.13(PAN_3:PAN-like domain)	0	114132966
gene-LOC114127615	yes|down	1	gene-LOC114127615	LOC114127615	maltase 1-like	638	104.27	183.28	665.96	67.81	38.78	55.6	15.24	26.22	91.75	10.26	5.95	7.95	44.4033	8.05333	0.212702	-2.23309	0.000873639	0.0110276	yes	down	XP_027847705.1(maltase 1-like, partial [Aphis gossypii])	GO:0003824(molecular_function:catalytic activity); GO:0016021(cellular_component:integral component of membrane); GO:0005975(biological_process:carbohydrate metabolic process); GO:0016787(molecular_function:hydrolase activity)	K01187	malZ	map00500(Starch and sucrose metabolism); map00052(Galactose metabolism)	COG0366(G:Carbohydrate transport and metabolism)	COG0366(alpha amylase, catalytic)	PF00128.25(Alpha-amylase:Alpha amylase, catalytic domain); PF14701.7(hDGE_amylase:Glycogen debranching enzyme, glucanotransferase domain)	sp|O16098|MAL1_DROVI(Maltase 1 OS=Drosophila virilis OX=7244 GN=Mal-B1 PE=3 SV=2)	114127615
gene-LOC114129839	yes|up	1	gene-LOC114129839	LOC114129839	40S ribosomal protein S2-like	972	3.87	6.1	10.41	51.13	47.93	49.95	0.28	0.45	0.71	3.65	3.41	3.41	0.48	3.49	9.62169	3.26629	6.98e-11	6.69e-09	yes	up	XP_027850487.1(40S ribosomal protein S2-like [Aphis gossypii])	GO:0003735(molecular_function:structural constituent of ribosome); GO:0015935(cellular_component:small ribosomal subunit); GO:0003723(molecular_function:RNA binding); GO:0006412(biological_process:translation)	K02981	RP-S2e, RPS2	map03010(Ribosome); map05171(Coronavirus disease - COVID-19)	COG0098(J:Translation, ribosomal structure and biogenesis)	COG0098(Located at the back of the 30S subunit body where it stabilizes the conformation of the head with respect to the body (By similarity))	PF00333.21(Ribosomal_S5:Ribosomal protein S5, N-terminal domain); PF03719.16(Ribosomal_S5_C:Ribosomal protein S5, C-terminal domain)	sp|P31009|RS2_DROME(40S ribosomal protein S2 OS=Drosophila melanogaster OX=7227 GN=RpS2 PE=1 SV=2)	114129839
gene-LOC114119138	yes|down	1	gene-LOC114119138	LOC114119138	agrin-like	5113	464	364	264	194	106	111	4.9	3.82	2.66	2.14	1.19	1.17	3.79333	1.5	0.486668	-1.03899	0.000477282	0.00685236	yes	down	XP_027836421.1(agrin-like [Aphis gossypii])	GO:0016021(cellular_component:integral component of membrane); GO:0005509(molecular_function:calcium ion binding); GO:0030246(molecular_function:carbohydrate binding)	0	0	0	ENOG410YKSA(S:Function unknown)	ENOG410YKSA(Integrase core domain protein)	PF07648.16(Kazal_2:Kazal-type serine protease inhibitor domain); PF00050.22(Kazal_1:Kazal-type serine protease inhibitor domain); PF00054.24(Laminin_G_1:Laminin G domain); PF02210.25(Laminin_G_2:Laminin G domain); PF00053.25(Laminin_EGF:Laminin EGF domain); PF00008.28(EGF:EGF-like domain)	sp|A2ASQ1|AGRIN_MOUSE(Agrin OS=Mus musculus OX=10090 GN=Agrn PE=1 SV=1)	114119138
gene-LOC114119139	yes|down	1	gene-LOC114119139	LOC114119139	uncharacterized LOC114119139	1426	894	1409	1321	343	235	230	40.06	62.48	56.38	16.05	11.19	10.25	52.9733	12.4967	0.284045	-1.81581	1.55e-10	1.39e-08	yes	down	XP_027836422.1(uncharacterized protein LOC114119139 [Aphis gossypii])	0	0	0	0	0	0	0	0	114119139
gene-LOC114127598	yes|up	1	gene-LOC114127598	LOC114127598	uncharacterized LOC114127598, transcript variant X1	720	0	0	0	5	7	9	0	0	0	0.61	0.91	1.31	0	0.943333	49.9892	5.64354	0.000419323	0.00627893	yes	up	0	0	0	0	0	0	0	0	0	114127598
gene-LOC114119135	yes|up	1	gene-LOC114119135	LOC114119135	ATP-dependent DNA helicase PIF1-like	2052	26.83	15.23	25.9	174.87	173.45	182.74	0.78	0.44	0.71	5.31	5.36	5.29	0.643333	5.32	10.1957	3.34989	5.39e-28	2.95e-25	yes	up	XP_027836417.1(ATP-dependent DNA helicase PIF1-like [Aphis gossypii])	GO:0006310(biological_process:DNA recombination); GO:0000723(biological_process:telomere maintenance); GO:0000002(biological_process:mitochondrial genome maintenance); GO:0006281(biological_process:DNA repair); GO:0005634(cellular_component:nucleus); GO:0005739(cellular_component:mitochondrion); GO:0003677(molecular_function:DNA binding); GO:0003678(molecular_function:DNA helicase activity); GO:0…	K15255	PIF1	0	COG0507(S:Function unknown)	COG0507(Mitochondrial ribosomal protein S27)	PF05970.15(PIF1:PIF1-like helicase); PF13604.7(AAA_30:AAA domain); PF13245.7(AAA_19:AAA domain); PF01443.19(Viral_helicase1:Viral (Superfamily 1) RNA helicase); PF13538.7(UvrD_C_2:UvrD-like helicase C-terminal domain); PF13401.7(AAA_22:AAA domain); PF02562.17(PhoH:PhoH-like protein); PF00004.30(AAA:ATPase family associated with various cellular activities (AAA))	sp|Q7ZV90|PIF1_DANRE(ATP-dependent DNA helicase PIF1 OS=Danio rerio OX=7955 GN=pif1 PE=2 SV=1)	114119135
gene-LOC114119136	yes|down	1	gene-LOC114119136	LOC114119136	ATP-dependent DNA helicase PIF1-like	2130	300.17	216.77	238.1	40.13	40.55	38.26	8.31	5.95	6.29	1.16	1.19	1.06	6.85	1.13667	0.205983	-2.2794	3.55e-20	1.2e-17	yes	down	XP_027836417.1(ATP-dependent DNA helicase PIF1-like [Aphis gossypii])	GO:0006310(biological_process:DNA recombination); GO:0000723(biological_process:telomere maintenance); GO:0000002(biological_process:mitochondrial genome maintenance); GO:0006281(biological_process:DNA repair); GO:0005634(cellular_component:nucleus); GO:0005739(cellular_component:mitochondrion); GO:0003677(molecular_function:DNA binding); GO:0003678(molecular_function:DNA helicase activity); GO:0…	K15255	PIF1	0	COG0507(L:Replication, recombination and repair)	COG0507(exodeoxyribonuclease v alpha)	PF05970.15(PIF1:PIF1-like helicase); PF13604.7(AAA_30:AAA domain); PF13245.7(AAA_19:AAA domain); PF01443.19(Viral_helicase1:Viral (Superfamily 1) RNA helicase); PF13538.7(UvrD_C_2:UvrD-like helicase C-terminal domain); PF13401.7(AAA_22:AAA domain); PF02562.17(PhoH:PhoH-like protein); PF00004.30(AAA:ATPase family associated with various cellular activities (AAA))	sp|Q7ZV90|PIF1_DANRE(ATP-dependent DNA helicase PIF1 OS=Danio rerio OX=7955 GN=pif1 PE=2 SV=1)	114119136
gene-LOC114131491	yes|up	1	gene-LOC114131491	LOC114131491	uncharacterized protein C6orf136 homolog	1663	24.22	74.03	65.02	149.04	188.8	146.99	0.91	2.72	2.25	5.83	7.41	5.48	1.96	6.24	3.82276	1.93461	4.13e-05	0.000953862	yes	up	XP_027852522.1(uncharacterized protein C6orf136 homolog [Aphis gossypii])	0	0	0	0	ENOG4111RAP(S:Function unknown)	ENOG4111RAP(chromosome 6 open reading frame 136)	PF10184.10(DUF2358:Uncharacterized conserved protein (DUF2358))	sp|Q32KT5|CF136_BOVIN(Uncharacterized protein C6orf136 homolog OS=Bos taurus OX=9913 PE=2 SV=1)	114131491
gene-LOC114131142	yes|up	1	gene-LOC114131142	LOC114131142	protein fuzzy-like	876	0	2.83	2.57	38.16	17.45	19.89	0	0.24	0.21	3.45	1.6	1.71	0.15	2.25333	15.723	3.97481	4.37e-06	0.00014244	yes	up	XP_027852088.1(protein fuzzy-like [Aphis gossypii])	GO:0006623(biological_process:protein targeting to vacuole)	K22861	FUZ, CPLANE3	0	ENOG410ZQFB(S:Function unknown)	ENOG410ZQFB(fuzzy homolog)	PF19036.1(Fuz_longin_1:First Longin domain of FUZ, MON1 and HPS1); PF19037.1(Fuz_longin_2:Second Longin domain of FUZ, MON1 and HPS1)	sp|O16868|FUZZY_DROME(Protein fuzzy OS=Drosophila melanogaster OX=7227 GN=fuz PE=2 SV=1)	114131142
gene-LOC114131679	yes|up	1	gene-LOC114131679	LOC114131679	3-hydroxyacyl-CoA dehydrogenase type-2	1078	492	400	438	894	735	580	31.78	25.51	26.89	60.19	50.33	37.15	28.06	49.2233	2.15219	1.1058	1.78e-08	1.07e-06	yes	up	XP_027852772.1(3-hydroxyacyl-CoA dehydrogenase type-2 [Aphis gossypii])	GO:0016491(molecular_function:oxidoreductase activity)	K08683	HSD17B10	map05010(Alzheimer disease); map00280(Valine, leucine and isoleucine degradation); map05022(Pathways of neurodegeneration - multiple diseases)	ENOG410XNNW(S:Function unknown)	ENOG410XNNW(Dehydrogenase)	PF13561.7(adh_short_C2:Enoyl-(Acyl carrier protein) reductase); PF00106.26(adh_short:short chain dehydrogenase); PF08659.11(KR:KR domain); PF01370.22(Epimerase:NAD dependent epimerase/dehydratase family)	sp|O18404|HCD2_DROME(3-hydroxyacyl-CoA dehydrogenase type-2 OS=Drosophila melanogaster OX=7227 GN=scu PE=1 SV=1)	114131679
gene-LOC114121311	yes|down	1	gene-LOC114121311	LOC114121311	uncharacterized LOC114121311	355	888	1892	1434	311	175	150	495.3	997.63	732.25	170.47	102.36	78.4	741.727	117.077	0.190232	-2.39417	6.23e-10	4.74e-08	yes	down	0	0	0	0	0	0	0	0	0	114121311
gene-LOC114121316	yes|down	1	gene-LOC114121316	LOC114121316	uncharacterized LOC114121316	437	99	158	165	43	25	24	24.81	35.83	33.42	11.39	6.72	5.51	31.3533	7.87333	0.27667	-1.85376	2.57e-06	9.09e-05	yes	down	XP_027839384.1(uncharacterized protein LOC114121316 [Aphis gossypii])	0	0	0	0	0	0	0	0	114121316
gene-LOC114125085	yes|down	1	gene-LOC114125085	LOC114125085	glucosidase 2 subunit beta-like	1836	5130	5024	3814	1528	1267	947	168.94	163.93	119.76	52.59	44.4	31.08	150.877	42.69	0.347546	-1.52472	1.72e-12	2.2e-10	yes	down	XP_027844380.1(glucosidase 2 subunit beta-like [Aphis gossypii])	GO:0016021(cellular_component:integral component of membrane); GO:0005509(molecular_function:calcium ion binding); GO:0006491(biological_process:N-glycan processing)	K08288	PRKCSH	map04141(Protein processing in endoplasmic reticulum)	ENOG410XPE3(O:Posttranslational modification, protein turnover, chaperones); COG5188(A:RNA processing and modification)	ENOG410XPE3(protein kinase C substrate); COG5188(Splicing factor 3A subunit 3)	PF12999.8(PRKCSH-like:Glucosidase II beta subunit-like); PF13015.7(PRKCSH_1:Glucosidase II beta subunit-like protein); PF07915.14(PRKCSH:Glucosidase II beta subunit-like protein); PF13405.7(EF-hand_6:EF-hand domain); PF00057.19(Ldl_recept_a:Low-density lipoprotein receptor domain class A); PF00036.33(EF-hand_1:EF hand)	sp|O08795|GLU2B_MOUSE(Glucosidase 2 subunit beta OS=Mus musculus OX=10090 GN=Prkcsh PE=1 SV=1)	114125085
gene-LOC114121318	yes|down	1	gene-LOC114121318	LOC114121318	cytochrome P450 6a2-like	2075	537	1014	2101	209	144	125	15.32	28.67	57.17	6.23	4.37	3.56	33.72	4.72	0.163992	-2.6083	2.76e-07	1.25e-05	yes	down	XP_027839388.1(cytochrome P450 6a2-like [Aphis gossypii])	GO:0005506(molecular_function:iron ion binding); GO:0016705(molecular_function:oxidoreductase activity, acting on paired donors, with incorporation or reduction of molecular oxygen); GO:0016021(cellular_component:integral component of membrane); GO:0004497(molecular_function:monooxygenase activity); GO:0020037(molecular_function:heme binding)	K14999	CYP6	0	COG2124(S:Function unknown)	COG2124(trimethylguanosine synthase)	PF00067.23(p450:Cytochrome P450)	sp|P33270|CP6A2_DROME(Cytochrome P450 6a2 OS=Drosophila melanogaster OX=7227 GN=Cyp6a2 PE=2 SV=2)	114121318
gene-LOC114127810	yes|up	1	gene-LOC114127810	LOC114127810	probable serine/threonine-protein kinase DDB_G0282963	5339	546	559	162	1285	1171	911	5.51	5.6	1.56	13.57	12.6	9.19	4.22333	11.7867	3.49479	1.80521	3.3e-05	0.000798217	yes	up	XP_027847942.1(probable serine/threonine-protein kinase DDB_G0282963 [Aphis gossypii])	GO:0005576(cellular_component:extracellular region); GO:0008061(molecular_function:chitin binding)	0	0	0	ENOG4111P12(S:Function unknown)	ENOG4111P12(Chitin binding Peritrophin-A domain)	PF01607.25(CBM_14:Chitin binding Peritrophin-A domain)	sp|P0DPW5|TX11A_CORWE(U-scoloptoxin(01)-Cw1a OS=Cormocephalus westwoodi OX=1096223 PE=3 SV=1)	114127810
gene-LOC114125325	yes|up	1	gene-LOC114125325	LOC114125325	cAMP-dependent protein kinase catalytic subunit alpha-like	502	0	0	0	8	6	2	0	0	0	1.96	1.49	0.46	0	1.30333	37.2241	5.21816	0.00364405	0.0333385	yes	up	XP_027844729.1(cAMP-dependent protein kinase catalytic subunit alpha-like, partial [Aphis gossypii])	GO:0004674(molecular_function:protein serine/threonine kinase activity); GO:0005524(molecular_function:ATP binding)	K04345	PKA	map05166(Human T-cell leukemia virus 1 infection); map05165(Human papillomavirus infection); map04114(Oocyte meiosis); map05163(Human cytomegalovirus infection); map05146(Amoebiasis); map04014(Ras signaling pathway); map04540(Gap junction); map04270(Vascular smooth muscle contraction); map01522(Endocrine resistance); map04371(Apelin signaling pathway); map04213(Longevity regulating pathway - mult…	ENOG410XPQQ(T:Signal transduction mechanisms)	ENOG410XPQQ(CAMP-dependent protein kinase, catalytic subunit)	PF00069.26(Pkinase:Protein kinase domain); PF07714.18(PK_Tyr_Ser-Thr:Protein tyrosine and serine/threonine kinase)	sp|P00517|KAPCA_BOVIN(cAMP-dependent protein kinase catalytic subunit alpha OS=Bos taurus OX=9913 GN=PRKACA PE=1 SV=3)	114125325
gene-LOC114123642	yes|up	1	gene-LOC114123642	LOC114123642	uncharacterized LOC114123642	273	0	0	0	543.8	209.77	447.2	0	0	0	208.6	80.97	159.44	0	149.67	2777.37	11.4395	4.42e-20	1.45e-17	yes	up	0	0	0	0	0	0	0	0	0	114123642
gene-LOC114123644	yes|down	1	gene-LOC114123644	LOC114123644	pancreatic triacylglycerol lipase-like, transcript variant X1	1418	109	202	121	61	31	33	5.73	10.61	6.46	4.05	1.84	1.85	7.6	2.58	0.367404	-1.44456	0.000445487	0.00653457	yes	down	XP_027842493.1(pancreatic triacylglycerol lipase-like isoform X1 [Aphis gossypii])	GO:0005576(cellular_component:extracellular region); GO:0052689(molecular_function:carboxylic ester hydrolase activity)	0	0	0	ENOG410Y91Z(S:Function unknown); ENOG410ZKVQ(S:Function unknown); ENOG4110NCN(S:Function unknown); ENOG4110RNC(S:Function unknown)	ENOG410Y91Z(Lipase); ENOG410ZKVQ(Lipase); ENOG4110NCN(Lipase); ENOG4110RNC(Lipase)	PF00151.20(Lipase:Lipase)	sp|P50903|LIPP_CAVPO(Pancreatic triacylglycerol lipase OS=Cavia porcellus OX=10141 GN=PNLIP PE=2 SV=1)	114123644
gene-LOC114129125	yes|up	1	gene-LOC114129125	LOC114129125	cuticle protein 7-like	557	184.79	305.91	6.96	1746.7	1377.17	2644.4	35.14	56.7	1.24	342.88	273.66	489.13	31.0267	368.557	15.2397	3.92976	0.000875856	0.0110321	yes	up	XP_027849558.1(cuticle protein 7-like, partial [Aphis gossypii])	GO:0042302(molecular_function:structural constituent of cuticle)	0	0	0	ENOG410YXTN(S:Function unknown)	ENOG410YXTN(Cuticular protein)	PF00379.24(Chitin_bind_4:Insect cuticle protein)	sp|P11733|CU07_LOCMI(Cuticle protein 7 OS=Locusta migratoria OX=7004 PE=1 SV=2)	114129125
gene-LOC114129126	yes|down	1	gene-LOC114129126	LOC114129126	uncharacterized LOC114129126, transcript variant X1	1260	173	265	183	52	63	18	9.08	13.75	9.14	2.91	3.59	0.97	10.6567	2.49	0.277454	-1.84968	0.000121251	0.00231241	yes	down	XP_027849560.1(uncharacterized protein LOC114129126 isoform X1 [Aphis gossypii])	0	0	0	0	0	0	0	0	114129126
gene-LOC114129127	yes|up	1	gene-LOC114129127	LOC114129127	uncharacterized LOC114129127	3880	3	12	4	86	83	72	0.04	0.17	0.05	1.28	1.26	1.02	0.0866667	1.18667	16.3897	4.03471	2.52e-14	4.2e-12	yes	up	KAE9532362.1(hypothetical protein AGLY_009985 [Aphis glycines])	0	0	0	0	0	0	0	0	114129127
gene-LOC114119713	yes|up	1	gene-LOC114119713	LOC114119713	uncharacterized LOC114119713	735	33	26	6	94	57	64	1.46	1.01	0.22	3.84	2.65	2.49	0.896667	2.99333	4.32925	2.11412	0.000131717	0.00249546	yes	up	XP_027837196.1(uncharacterized protein LOC114119713 [Aphis gossypii])	GO:0022857(molecular_function:transmembrane transporter activity); GO:0016021(cellular_component:integral component of membrane)	0	0	0	ENOG410YMHR(T:Signal transduction mechanisms)	ENOG410YMHR(Cyclin-Dependent Kinase)	PF12832.8(MFS_1_like:MFS_1 like family); PF07690.17(MFS_1:Major Facilitator Superfamily); PF03825.17(Nuc_H_symport:Nucleoside H+ symporter)	sp|Q1LUQ4|MFD6A_DANRE(Major facilitator superfamily domain-containing protein 6-A OS=Danio rerio OX=7955 GN=mfsd6a PE=3 SV=1)	114119713
gene-LOC114121948	yes|down	1	gene-LOC114121948	LOC114121948	serine/threonine-protein kinase nekl-3-like, transcript variant X1	1514	81	46	55	13	18	19	3.43	1.9	2.19	0.6	0.8	0.86	2.50667	0.753333	0.362686	-1.46321	0.000538761	0.00762084	yes	down	XP_027840266.1(serine/threonine-protein kinase nekl-3-like isoform X1 [Aphis gossypii])	GO:0004674(molecular_function:protein serine/threonine kinase activity); GO:0005524(molecular_function:ATP binding)	K20876	NEK7	map04621(NOD-like receptor signaling pathway)	ENOG410Y7JF(T:Signal transduction mechanisms); ENOG410XNQP(T:Signal transduction mechanisms)	ENOG410Y7JF(CAMK family protein kinase); ENOG410XNQP(NIMA-related kinase)	PF00069.26(Pkinase:Protein kinase domain); PF07714.18(PK_Tyr_Ser-Thr:Protein tyrosine and serine/threonine kinase)	sp|G5EFM9|NEKL3_CAEEL(Serine/threonine-protein kinase nekl-3 OS=Caenorhabditis elegans OX=6239 GN=nekl-3 PE=1 SV=1)	114121948
gene-LOC114133133	yes|down	1	gene-LOC114133133	LOC114133133	TBC1 domain family member 19	2426	1133	1327	1350	7	4	6	27.01	31.37	30.71	0.17	0.1	0.14	29.6967	0.136667	0.00574661	-7.44307	1.82e-71	6.96e-68	yes	down	XP_027854578.1(TBC1 domain family member 19 [Aphis gossypii])	0	0	0	0	ENOG410XRPM(S:Function unknown)	ENOG410XRPM(TBC1 domain family, member 19)	PF00566.19(RabGAP-TBC:Rab-GTPase-TBC domain)	sp|Q8N5T2|TBC19_HUMAN(TBC1 domain family member 19 OS=Homo sapiens OX=9606 GN=TBC1D19 PE=1 SV=2)	114133133
gene-LOC114119718	yes|up	1	gene-LOC114119718	LOC114119718	putative acid phosphatase 5	867	6.26	5.51	3.76	69.68	33.25	27.19	0.55	0.48	0.31	6.39	3.1	2.37	0.446667	3.95333	10.3683	3.37411	3.38e-08	1.92e-06	yes	up	XP_027837195.1(testicular acid phosphatase homolog [Aphis gossypii])	GO:0016021(cellular_component:integral component of membrane); GO:0003993(molecular_function:acid phosphatase activity)	K14410	ACP2	map04142(Lysosome); map00740(Riboflavin metabolism)	ENOG410ZVBQ(V:Defense mechanisms)	ENOG410ZVBQ((ABC) transporter)	PF00328.23(His_Phos_2:Histidine phosphatase superfamily (branch 2))	sp|Q10944|PHO5_CAEEL(Putative acid phosphatase 5 OS=Caenorhabditis elegans OX=6239 GN=pho-5 PE=1 SV=3)	114119718
gene-LOC114129129	yes|up	1	gene-LOC114129129	LOC114129129	FK506-binding protein 5-like	1450	11.51	10.06	11.18	74.69	97.59	42.15	0.51	0.44	0.47	3.42	4.55	1.84	0.473333	3.27	8.53152	3.0928	5.22e-10	4.08e-08	yes	up	XP_027849565.1(FK506-binding protein 5-like [Aphis gossypii])	0	0	0	0	ENOG410ZIE4(S:Function unknown); COG0545(S:Function unknown)	ENOG410ZIE4(-); COG0545(-)	0	0	114129129
gene-LOC114119620	yes|up	1	gene-LOC114119620	LOC114119620	33 kDa inner dynein arm light chain, axonemal-like	985	29	44	37	116	96	108	0.96	1.44	1.21	4.02	3.38	3.56	1.20333	3.65333	3.75367	1.9083	2.11e-10	1.79e-08	yes	up	XP_027837035.1(33 kDa inner dynein arm light chain, axonemal-like [Aphis gossypii])	0	K10410	DNALI	map05016(Huntington disease); map05022(Pathways of neurodegeneration - multiple diseases); map05014(Amyotrophic lateral sclerosis)	ENOG410XP66(S:Function unknown)	ENOG410XP66(leucine Rich Repeat)	PF10211.10(Ax_dynein_light:Axonemal dynein light chain)	sp|Q26630|IDLC_STRPU(33 kDa inner dynein arm light chain, axonemal OS=Strongylocentrotus purpuratus OX=7668 PE=1 SV=1)	114119620
gene-LOC114133045	yes|down	1	gene-LOC114133045	LOC114133045	protein ALP1-like	1420	62	67	36	0	0	0	2.79	2.99	1.54	0	0	0	2.44	0	0.00437181	-7.83755	9.89e-10	7.38e-08	yes	down	XP_027854472.1(protein ALP1-like [Aphis gossypii])	0	0	0	0	ENOG411206Y(G:Carbohydrate transport and metabolism); ENOG41113K9(S:Function unknown)	ENOG411206Y(Major Facilitator Superfamily); ENOG41113K9(-)	PF13359.7(DDE_Tnp_4:DDE superfamily endonuclease); PF04827.15(Plant_tran:Plant transposon protein)	sp|Q9M2U3|ALPL_ARATH(Protein ALP1-like OS=Arabidopsis thaliana OX=3702 GN=At3g55350 PE=2 SV=1)	114133045
gene-LOC114127461	yes|up	1	gene-LOC114127461	LOC114127461	uncharacterized LOC114127461	813	0	0	2	73	48	57	0	0	0.18	7.38	4.93	5.47	0.06	5.92667	114.516	6.8394	3.59e-10	2.93e-08	yes	up	XP_027847502.1(uncharacterized protein LOC114127461, partial [Aphis gossypii])	GO:0003964(molecular_function:RNA-directed DNA polymerase activity); GO:0004519(molecular_function:endonuclease activity); GO:0004527(molecular_function:exonuclease activity); GO:0008270(molecular_function:zinc ion binding); GO:0003676(molecular_function:nucleic acid binding)	0	0	0	ENOG41120A8(S:Function unknown); ENOG41112V0(S:Function unknown); ENOG410YRUW(S:Function unknown); ENOG410ZMPH(S:Function unknown); ENOG410YMB3(S:Function unknown); ENOG41113CD(S:Function unknown); ENOG4111RKA(S:Function unknown)	ENOG41120A8(-); ENOG41112V0(Pfam:RnaseH); ENOG410YRUW(reverse transcriptase); ENOG410ZMPH(-); ENOG410YMB3(-); ENOG41113CD(-); ENOG4111RKA(-)	PF14529.7(Exo_endo_phos_2:Endonuclease-reverse transcriptase); PF03372.24(Exo_endo_phos:Endonuclease/Exonuclease/phosphatase family)	0	114127461
gene-LOC114132840	yes|up	1	gene-LOC114132840	LOC114132840	growth/differentiation factor 8-like	2079	531	487	276	1246	1440	546	15.11	13.74	7.49	37.07	43.63	15.5	12.1133	32.0667	3.28466	1.71574	3.04e-05	0.000756511	yes	up	XP_027854227.1(growth/differentiation factor 8-like, partial [Aphis gossypii])	GO:0005576(cellular_component:extracellular region); GO:0008083(molecular_function:growth factor activity)	K05497;K22679	MSTN, GDF8;GDF11	map04060(Cytokine-cytokine receptor interaction)	ENOG410XT8Z(S:Function unknown)	ENOG410XT8Z(FtsJ methyltransferase domain containing 1)	PF00019.21(TGF_beta:Transforming growth factor beta like domain); PF00688.19(TGFb_propeptide:TGF-beta propeptide)	sp|Q8UWD7|GDF8_SYNCH(Growth/differentiation factor 8 OS=Synoicus chinensis OX=46218 GN=MSTN PE=2 SV=1)	114132840
gene-LOC114119961	yes|up	1	gene-LOC114119961	LOC114119961	uncharacterized LOC114119961	789	18.62	58.67	90.25	590.03	745.93	727.33	1.9	5.88	8.71	62.52	80.27	73.1	5.49667	71.9633	15.6862	3.97143	2.23e-14	3.77e-12	yes	up	XP_027837512.1(uncharacterized protein LOC114119961 [Aphis gossypii])	GO:0009617(biological_process:response to bacterium); GO:0016021(cellular_component:integral component of membrane); GO:0005125(molecular_function:cytokine activity); GO:0051607(biological_process:defense response to virus); GO:0005615(cellular_component:extracellular space)	0	0	0	ENOG4110N7Y(S:Function unknown)	ENOG4110N7Y(-)	PF04970.14(LRAT:Lecithin retinol acyltransferase); PF13164.7(Diedel:Diedel)	sp|Q9VAK8|DIE_DROME(Protein Diedel OS=Drosophila melanogaster OX=7227 GN=Diedel PE=1 SV=1)	114119961
gene-LOC114131312	yes|up	1	gene-LOC114131312	LOC114131312	protein obstructor-E-like	869	3177	3208	1062	3533	5552	4648	279.25	277.74	88.51	323.05	515.83	403.56	215.167	414.147	2.46328	1.30058	0.00253418	0.0250883	yes	up	XP_026822117.1(protein obstructor-E-like [Rhopalosiphum maidis])	GO:0005576(cellular_component:extracellular region); GO:0008061(molecular_function:chitin binding)	K15174	PAF1	0	ENOG410ZSCN(S:Function unknown); ENOG4111EXD(S:Function unknown)	ENOG410ZSCN(Cuticular protein analogous to peritrophins 3-A1); ENOG4111EXD(chitin binding)	0	sp|Q9VMM6|OBSTE_DROME(Protein obstructor-E OS=Drosophila melanogaster OX=7227 GN=obst-E PE=2 SV=2)	114131312
gene-LOC114131313	yes|up	1	gene-LOC114131313	LOC114131313	0	874	942.51	660.25	274.42	825.88	1518.04	1124.56	82.14	56.68	22.68	74.87	139.85	96.81	53.8333	103.843	2.49609	1.31967	0.00355765	0.0327209	yes	up	NP_001165857.1(cuticular protein analogous to peritrophins 3-B precursor [Acyrthosiphon pisum])	GO:0005576(cellular_component:extracellular region); GO:0008061(molecular_function:chitin binding)	0	0	0	ENOG4111EXD(S:Function unknown)	ENOG4111EXD(chitin binding)	0	sp|Q9VMM6|OBSTE_DROME(Protein obstructor-E OS=Drosophila melanogaster OX=7227 GN=obst-E PE=2 SV=2)	114131313
gene-LOC114131311	yes|up	1	gene-LOC114131311	LOC114131311	protein obstructor-E-like, transcript variant X2	1354	3364	2884	1100	3646	4962	4364	124.66	109.49	39.7	151.52	208.4	175.53	91.2833	178.483	2.35649	1.23664	0.00196183	0.0206603	yes	up	XP_027852300.1(protein obstructor-E-like isoform X1 [Aphis gossypii])	GO:0005576(cellular_component:extracellular region); GO:0008061(molecular_function:chitin binding)	0	0	0	ENOG4111EK0(S:Function unknown); ENOG4111EXD(S:Function unknown); ENOG410ZSCN(S:Function unknown)	ENOG4111EK0(Cuticular protein analogous to peritrophins 3-A2); ENOG4111EXD(chitin binding); ENOG410ZSCN(Cuticular protein analogous to peritrophins 3-A1)	PF01607.25(CBM_14:Chitin binding Peritrophin-A domain)	sp|Q9VMM6|OBSTE_DROME(Protein obstructor-E OS=Drosophila melanogaster OX=7227 GN=obst-E PE=2 SV=2)	114131311
gene-LOC114131861	yes|down	1	gene-LOC114131861	LOC114131861	glucose dehydrogenase [FAD, quinone]-like	2304	4955	6982	5536	2633	1639	1196	125.27	175.04	133.55	69.61	44.13	30.17	144.62	47.97	0.398126	-1.3287	1.76e-05	0.000469115	yes	down	XP_027853010.1(glucose dehydrogenase [FAD, quinone]-like [Aphis gossypii])	GO:0050660(molecular_function:flavin adenine dinucleotide binding); GO:0016614(molecular_function:oxidoreductase activity, acting on CH-OH group of donors)	K00108	betA, CHDH	map00260(Glycine, serine and threonine metabolism)	COG2303(S:Function unknown)	COG2303(Rna-binding protein)	PF00732.20(GMC_oxred_N:GMC oxidoreductase); PF05199.14(GMC_oxred_C:GMC oxidoreductase); PF05834.13(Lycopene_cycl:Lycopene cyclase protein)	sp|P18172|DHGL_DROPS(Glucose dehydrogenase [FAD, quinone] OS=Drosophila pseudoobscura pseudoobscura OX=46245 GN=Gld PE=3 SV=4)	114131861
gene-LOC114119969	yes|down	1	gene-LOC114119969	LOC114119969	0	1316	454	435	391	0	0	0	22.53	21.35	18.47	0	0	0	20.7833	0	0.000561233	-10.7991	1.76e-19	5.34e-17	yes	down	XP_003244309.1(protein ALP1-like [Acyrthosiphon pisum])	0	0	0	0	ENOG41117SD(S:Function unknown); ENOG411206Y(S:Function unknown)	ENOG41117SD(-); ENOG411206Y(transposon protein)	0	sp|Q96MB7|HARB1_HUMAN(Putative nuclease HARBI1 OS=Homo sapiens OX=9606 GN=HARBI1 PE=1 SV=1)	114119969
gene-LOC114124071	yes|up	1	gene-LOC114124071	LOC114124071	1,5-anhydro-D-fructose reductase-like	1461	2006	1725	1933	10491	9531	9709	86.8	73.58	79.55	472.21	437.52	416.1	79.9767	441.943	6.82289	2.77038	1.29e-113	7.4e-110	yes	up	KAE9531549.1(hypothetical protein AGLY_010755 [Aphis glycines])	GO:0016491(molecular_function:oxidoreductase activity)	K00002	AKR1A1, adh	map00561(Glycerolipid metabolism); map01240(Biosynthesis of cofactors); map00040(Pentose and glucuronate interconversions); map00620(Pyruvate metabolism); map05208(Chemical carcinogenesis - reactive oxygen species); map00010(Glycolysis / Gluconeogenesis); map00053(Ascorbate and aldarate metabolism)	COG0656(S:Function unknown)	COG0656(reductase)	PF00248.22(Aldo_ket_red:Aldo/keto reductase family)	sp|Q9JII6|AK1A1_MOUSE(Aldo-keto reductase family 1 member A1 OS=Mus musculus OX=10090 GN=Akr1a1 PE=1 SV=3)	114124071
gene-LOC114124072	yes|up	1	gene-LOC114124072	LOC114124072	uncharacterized LOC114124072	1742	1173	3186	4957	24992	20038	19905	41.13	110.66	165.67	915.49	747.28	694.99	105.82	785.92	8.77621	3.1336	1.67e-10	1.49e-08	yes	up	XP_027843039.1(uncharacterized protein LOC114124072 [Aphis gossypii])	GO:0016787(molecular_function:hydrolase activity); GO:0046872(molecular_function:metal ion binding); GO:0003676(molecular_function:nucleic acid binding); GO:0004519(molecular_function:endonuclease activity)	0	0	0	ENOG4111S9Z(F:Nucleotide transport and metabolism)	ENOG4111S9Z(DNA/RNA non-specific endonuclease)	PF01223.24(Endonuclease_NS:DNA/RNA non-specific endonuclease)	0	114124072
gene-LOC114124075	yes|up	1	gene-LOC114124075	LOC114124075	aldose reductase-like	1408	2550	3224	2689	3850	4764	4398	122.63	155.06	127.85	200.56	248.52	217.84	135.18	222.307	2.0061	1.00439	8.35e-06	0.000251298	yes	up	XP_027843044.1(aldose reductase-like [Aphis gossypii])	GO:0016491(molecular_function:oxidoreductase activity)	K00011	AKR1B	map00051(Fructose and mannose metabolism); map00040(Pentose and glucuronate interconversions); map00561(Glycerolipid metabolism); map00790(Folate biosynthesis); map00052(Galactose metabolism)	COG0656(S:Function unknown)	COG0656(reductase)	PF00248.22(Aldo_ket_red:Aldo/keto reductase family)	sp|P15121|ALDR_HUMAN(Aldo-keto reductase family 1 member B1 OS=Homo sapiens OX=9606 GN=AKR1B1 PE=1 SV=3)	114124075
gene-LOC114121896	yes|up	1	gene-LOC114121896	LOC114121896	EF-hand domain-containing protein D2 homolog	545	0	0	0	70.08	65.68	112.2	0	0	0	14.39	13.65	21.69	0	16.5767	586.562	9.19614	2.5e-13	3.69e-11	yes	up	XP_027840186.1(EF-hand domain-containing protein D2 homolog [Aphis gossypii])	GO:0005509(molecular_function:calcium ion binding)	K23922	EFHD2	0	ENOG4111JG9(S:Function unknown)	ENOG4111JG9(EF-hand domain family, member)	PF00036.33(EF-hand_1:EF hand); PF13499.7(EF-hand_7:EF-hand domain pair); PF13833.7(EF-hand_8:EF-hand domain pair)	sp|Q9VJ26|EFHD2_DROME(EF-hand domain-containing protein D2 homolog OS=Drosophila melanogaster OX=7227 GN=Swip-1 PE=2 SV=1)	114121896
gene-LOC114122209	yes|down	1	gene-LOC114122209	LOC114122209	allatotropins-like	1008	177	255	188	105	56	80	12.55	17.84	12.66	7.75	4.2	5.62	14.35	5.85667	0.496811	-1.00923	0.00110069	0.0131716	yes	down	XP_027840600.1(allatotropins-like [Aphis gossypii])	GO:0005509(molecular_function:calcium ion binding)	0	0	0	0	0	PF13202.7(EF-hand_5:EF hand); PF00036.33(EF-hand_1:EF hand)	0	114122209
gene-LOC114124177	yes|up	1	gene-LOC114124177	LOC114124177	glucose dehydrogenase [FAD, quinone]-like	1002	47	18	33	183	205	95	3.36	1.27	2.24	13.63	15.52	6.73	2.29	11.96	6.48806	2.69779	2.57e-09	1.82e-07	yes	up	XP_027843167.1(glucose dehydrogenase [FAD, quinone]-like, partial [Aphis gossypii])	GO:0050660(molecular_function:flavin adenine dinucleotide binding); GO:0016614(molecular_function:oxidoreductase activity, acting on CH-OH group of donors)	0	0	0	COG2303(E:Amino acid transport and metabolism)	COG2303(oxidoreductase)	PF00732.20(GMC_oxred_N:GMC oxidoreductase)	sp|P18172|DHGL_DROPS(Glucose dehydrogenase [FAD, quinone] OS=Drosophila pseudoobscura pseudoobscura OX=46245 GN=Gld PE=3 SV=4)	114124177
gene-LOC114131883	yes|down	1	gene-LOC114131883	LOC114131883	alkaline ceramidase 3-like	929	32.95	37.28	18.51	4.84	0	4.3	3.37	2.93	1.4	0.66	0	0.34	2.56667	0.333333	0.129659	-2.94721	0.000254995	0.00423764	yes	down	XP_027852839.1(alkaline ceramidase 3-like [Aphis gossypii])	GO:0016021(cellular_component:integral component of membrane); GO:0016811(molecular_function:hydrolase activity, acting on carbon-nitrogen (but not peptide) bonds, in linear amides); GO:0006672(biological_process:ceramide metabolic process)	K04711	ACER3, YDC1	map00600(Sphingolipid metabolism)	ENOG4111RPN(U:Intracellular trafficking, secretion, and vesicular transport)	ENOG4111RPN(alkaline ceramidase)	PF05875.13(Ceramidase:Ceramidase)	sp|Q9D099|ACER3_MOUSE(Alkaline ceramidase 3 OS=Mus musculus OX=10090 GN=Acer3 PE=1 SV=1)	114131883
gene-LOC114132103	yes|down	1	gene-LOC114132103	LOC114132103	piggyBac transposable element-derived protein 4, transcript variant X1	1866	69	52	75	0	0	0	2.53	1.96	2.73	0	0	0	2.40667	0	0.00365735	-8.09499	1.1e-10	1.02e-08	yes	down	XP_025192822.1(piggyBac transposable element-derived protein 4-like [Melanaphis sacchari])	0	0	0	0	ENOG410XVJ3(S:Function unknown)	ENOG410XVJ3(-)	PF13843.7(DDE_Tnp_1_7:Transposase IS4); PF01609.22(DDE_Tnp_1:Transposase DDE domain); PF13842.7(Tnp_zf-ribbon_2:DDE_Tnp_1-like zinc-ribbon)	sp|Q96DM1|PGBD4_HUMAN(PiggyBac transposable element-derived protein 4 OS=Homo sapiens OX=9606 GN=PGBD4 PE=2 SV=3)	114132103
gene-LOC114129157	yes|down	1	gene-LOC114129157	LOC114129157	uncharacterized LOC114129157, transcript variant X1	1728	22	27	14	2.01	2	2	0.84	0.97	0.51	0.07	0.08	0.07	0.773333	0.0733333	0.124056	-3.01093	0.000283238	0.00460062	yes	down	XP_027849601.1(atrial natriuretic peptide receptor 1 [Aphis gossypii])	GO:0016021(cellular_component:integral component of membrane); GO:0016849(molecular_function:phosphorus-oxygen lyase activity); GO:0000166(molecular_function:nucleotide binding); GO:0004672(molecular_function:protein kinase activity); GO:0035556(biological_process:intracellular signal transduction); GO:0009190(biological_process:cyclic nucleotide biosynthetic process); GO:0004383(molecular_functi…	K12323	ANPRA, NPR1	map04024(cAMP signaling pathway); map00230(Purine metabolism); map04270(Vascular smooth muscle contraction); map04921(Oxytocin signaling pathway); map04714(Thermogenesis); map04923(Regulation of lipolysis in adipocytes); map04925(Aldosterone synthesis and secretion); map04924(Renin secretion); map04022(cGMP-PKG signaling pathway)	COG2114(T:Signal transduction mechanisms)	COG2114(Guanylate Cyclase)	0	sp|P18293|ANPRA_MOUSE(Atrial natriuretic peptide receptor 1 OS=Mus musculus OX=10090 GN=Npr1 PE=1 SV=2)	114129157
gene-LOC114131649	yes|up	1	gene-LOC114131649	LOC114131649	0	645	357	1392	2217	4593	4033	5631	51.15	195.28	299.51	681.46	606.76	789.99	181.98	692.737	4.53255	2.18032	0.000167729	0.00302332	yes	up	KAF0728715.1(putative leucine-rich repeat-containing protein [Aphis craccivora])	0	0	0	0	ENOG410XQCA(S:Function unknown)	ENOG410XQCA(-)	0	0	114131649
gene-LOC114130669	yes|up	1	gene-LOC114130669	LOC114130669	translation initiation factor IF-2-like, transcript variant X2	1000	7.39	8.67	0	48.11	24.36	39.63	0.5	0.42	0	2.18	1.12	1.71	0.306667	1.67	9.08934	3.18418	4.23e-05	0.000973716	yes	up	KAE9521628.1(hypothetical protein AGLY_017996 [Aphis glycines])	0	0	0	0	0	0	0	0	114130669
gene-LOC114129012	yes|down	1	gene-LOC114129012	LOC114129012	uncharacterized LOC114129012	1127	357	565	1937	277	251	178	21.71	33.94	112.01	17.56	16.19	10.74	55.8867	14.83	0.310164	-1.6889	0.00550604	0.0450673	yes	down	XP_027849433.1(uncharacterized protein LOC114129012 [Aphis gossypii])	0	0	0	0	0	0	0	0	114129012
gene-LOC114124902	yes|up	1	gene-LOC114124902	LOC114124902	serpin B5-like	1409	147	139	85	379	648	436	6.29	5.69	3.64	17.22	29.38	19.1	5.20667	21.9	5.24258	2.39028	4.27e-12	5.01e-10	yes	up	XP_027844148.1(serpin B5-like [Aphis gossypii])	GO:0005615(cellular_component:extracellular space)	0	0	0	ENOG4111E6F(O:Posttranslational modification, protein turnover, chaperones); COG4826(O:Posttranslational modification, protein turnover, chaperones)	ENOG4111E6F(SERPIN); COG4826(serine-type endopeptidase inhibitor activity)	PF00079.21(Serpin:Serpin (serine protease inhibitor))	sp|Q5JJ64|Y1782_THEKO(Uncharacterized serpin-like protein TK1782 OS=Thermococcus kodakarensis (strain ATCC BAA-918 / JCM 12380 / KOD1) OX=69014 GN=TK1782 PE=3 SV=1)	114124902
gene-LOC114131920	yes|down	1	gene-LOC114131920	LOC114131920	rap guanine nucleotide exchange factor 4, transcript variant X1	3798	400	533	523	234	138	146	5.43	7.74	7.67	3.42	2.26	2.1	6.94667	2.59333	0.453062	-1.14222	3.25e-05	0.000794809	yes	down	XP_027853069.1(rap guanine nucleotide exchange factor 4 isoform X1 [Aphis gossypii])	GO:0007264(biological_process:small GTPase mediated signal transduction); GO:0005085(molecular_function:guanyl-nucleotide exchange factor activity)	K04351	RAPGEF4, EPAC2	map04015(Rap1 signaling pathway); map04261(Adrenergic signaling in cardiomyocytes); map04911(Insulin secretion); map04024(cAMP signaling pathway); map04072(Phospholipase D signaling pathway); map04670(Leukocyte transendothelial migration)	ENOG410XPX9(T:Signal transduction mechanisms)	ENOG410XPX9(rap guanine nucleotide exchange factor)	PF00617.20(RasGEF:RasGEF domain); PF00027.30(cNMP_binding:Cyclic nucleotide-binding domain); PF00610.22(DEP:Domain found in Dishevelled, Egl-10, and Pleckstrin (DEP)); PF00618.21(RasGEF_N:RasGEF N-terminal motif)	sp|Q8WZA2|RPGF4_HUMAN(Rap guanine nucleotide exchange factor 4 OS=Homo sapiens OX=9606 GN=RAPGEF4 PE=1 SV=1)	114131920
gene-LOC114125196	yes|down	1	gene-LOC114125196	LOC114125196	uncharacterized LOC114125196	1208	76	91	81	3	8	6	4.35	5.15	4.41	0.17	0.49	0.34	4.63667	0.333333	0.0894788	-3.48231	4.76e-12	5.38e-10	yes	down	XP_027844539.1(LOW QUALITY PROTEIN: uncharacterized protein LOC114125196 [Aphis gossypii])	0	0	0	0	ENOG410YTVD(S:Function unknown)	ENOG410YTVD(Conserved hypothetical, protein)	0	0	114125196
gene-LOC114119569	yes|up	1	gene-LOC114119569	LOC114119569	heat shock protein 70 A1-like	2345	215	822	773.61	2207	568.24	2532.59	5.33	20.2	18.29	57.18	15	62.61	14.6067	44.93	3.64884	1.86744	0.00295622	0.0282833	yes	up	XP_027836957.1(heat shock protein 70 A1-like [Aphis gossypii])	GO:0005524(molecular_function:ATP binding)	K03283	HSPA1s	map05162(Measles); map05145(Toxoplasmosis); map04915(Estrogen signaling pathway); map04010(MAPK signaling pathway); map03040(Spliceosome); map05134(Legionellosis); map04213(Longevity regulating pathway - multiple species); map05417(Lipid and atherosclerosis); map04144(Endocytosis); map04612(Antigen processing and presentation); map04141(Protein processing in endoplasmic reticulum); map05020(Prion…	COG0443(O:Posttranslational modification, protein turnover, chaperones)	COG0443(Heat shock protein)	PF00012.21(HSP70:Hsp70 protein); PF06723.14(MreB_Mbl:MreB/Mbl protein)	sp|P41825|HSP71_ANOAL(Heat shock protein 70 A1 OS=Anopheles albimanus OX=7167 GN=HSP70A1 PE=3 SV=1)	114119569
gene-LOC114128890	yes|down	1	gene-LOC114128890	LOC114128890	papain inhibitor-like	1376	216	1400	688	51	124	98	10.13	64.93	30.71	2.5	6.17	4.57	35.2567	4.41333	0.153892	-2.70001	4.06e-05	0.00094312	yes	down	XP_027849296.1(uncharacterized protein LOC114128890 [Aphis gossypii])	0	0	0	0	ENOG4111UKS(S:Function unknown)	ENOG4111UKS(riboflavin aldehyde-forming enzyme)	PF03330.19(DPBB_1:Lytic transglycolase)	sp|P86242|PAPI_STRMB(Papain inhibitor OS=Streptomyces mobaraensis OX=35621 GN=pi PE=1 SV=2)	114128890
gene-LOC114122663	yes|up	1	gene-LOC114122663	LOC114122663	trans-1,2-dihydrobenzene-1,2-diol dehydrogenase-like	1468	0	0	0	516.52	539.15	1054.13	0	0	0	23.31	24.76	45.32	0	31.13	5010.01	12.2906	6.76e-23	2.43e-20	yes	up	XP_027841195.1(trans-1,2-dihydrobenzene-1,2-diol dehydrogenase-like [Aphis gossypii])	GO:0016491(molecular_function:oxidoreductase activity)	K00078	DHDH	map00040(Pentose and glucuronate interconversions); map00980(Metabolism of xenobiotics by cytochrome P450)	COG0673(S:Function unknown)	COG0673(oxidoreductase)	PF01408.23(GFO_IDH_MocA:Oxidoreductase family, NAD-binding Rossmann fold); PF02894.18(GFO_IDH_MocA_C:Oxidoreductase family, C-terminal alpha/beta domain)	sp|Q6DKE0|DHDH_XENLA(Trans-1,2-dihydrobenzene-1,2-diol dehydrogenase OS=Xenopus laevis OX=8355 GN=dhdh PE=2 SV=1)	114122663
gene-LOC114126320	yes|down	1	gene-LOC114126320	LOC114126320	dynein beta chain, ciliary	8624	77	64	81	10	3	3	0.47	0.39	0.47	0.06	0.02	0.02	0.443333	0.0333333	0.0922089	-3.43895	1.81e-10	1.55e-08	yes	down	XP_027846037.1(dynein beta chain, ciliary [Aphis gossypii])	GO:0030286(cellular_component:dynein complex); GO:0007018(biological_process:microtubule-based movement); GO:0003777(molecular_function:microtubule motor activity); GO:0005524(molecular_function:ATP binding)	K10408	DNAH	map05016(Huntington disease); map05022(Pathways of neurodegeneration - multiple diseases); map05014(Amyotrophic lateral sclerosis)	COG5245(Z:Cytoskeleton)	COG5245(heavy chain)	PF12777.8(MT:Microtubule-binding stalk of dynein motor); PF12774.8(AAA_6:Hydrolytic ATP binding site of dynein motor region); PF18199.2(Dynein_C:Dynein heavy chain C-terminal domain); PF12780.8(AAA_8:P-loop containing dynein motor region D4); PF12781.8(AAA_9:ATP-binding dynein motor region); PF12775.8(AAA_7:P-loop containing dynein motor region); PF18198.2(AAA_lid_11:Dynein heavy chain AAA lid do…	sp|P23098|DYHC_TRIGR(Dynein beta chain, ciliary OS=Tripneustes gratilla OX=7673 PE=1 SV=1)	114126320
gene-LOC114131296	yes|up	1	gene-LOC114131296	LOC114131296	sepiapterin reductase-like, transcript variant X2	1063	239	163	90	393.03	602.88	737.99	14.54	9.86	5.2	25.29	39.33	44.62	9.86667	36.4133	4.72832	2.24133	3.6e-08	2.03e-06	yes	up	KAE9534460.1(hypothetical protein AGLY_008550 [Aphis glycines])	GO:0006729(biological_process:tetrahydrobiopterin biosynthetic process); GO:0004757(molecular_function:sepiapterin reductase activity)	K00072	SPR	map00790(Folate biosynthesis); map01240(Biosynthesis of cofactors)	ENOG4111PZG(S:Function unknown)	ENOG4111PZG(sepiapterin reductase (7,8-dihydrobiopterin NADP oxidoreductase))	PF00106.26(adh_short:short chain dehydrogenase); PF13561.7(adh_short_C2:Enoyl-(Acyl carrier protein) reductase)	sp|Q8R536|SPRE_MERUN(Sepiapterin reductase OS=Meriones unguiculatus OX=10047 GN=SPR PE=2 SV=1)	114131296
gene-LOC114130526	yes|up	1	gene-LOC114130526	LOC114130526	uncharacterized LOC114130526	533	894	519	256	1149	997	827	186.59	105.38	50.08	247.26	217.04	167.46	114.017	210.587	2.36292	1.24057	0.00187522	0.0199491	yes	up	XP_027851317.1(uncharacterized protein LOC114130526 [Aphis gossypii])	0	0	0	0	0	0	0	0	114130526
gene-LOC114123790	yes|up	1	gene-LOC114123790	LOC114123790	DNA-directed RNA polymerase II subunit RPB3-like	985	31	26	21	138	94	170	2.27	1.88	1.46	10.53	7.29	12.33	1.87	10.05	6.70795	2.74587	3.55e-15	6.7e-13	yes	up	XP_027842684.1(DNA-directed RNA polymerase II subunit RPB3-like [Aphis gossypii])	GO:0003899(molecular_function:DNA-directed RNA polymerase activity); GO:0046983(molecular_function:protein dimerization activity); GO:0006351(biological_process:transcription, DNA-templated); GO:0003677(molecular_function:DNA binding)	K03011	RPB3, POLR2C	map03020(RNA polymerase); map05016(Huntington disease)	COG0202(K:Transcription)	COG0202(DNA-dependent RNA polymerase catalyzes the transcription of DNA into RNA using the four ribonucleoside triphosphates as substrates (By similarity))	PF01000.27(RNA_pol_A_bac:RNA polymerase Rpb3/RpoA insert domain); PF01193.25(RNA_pol_L:RNA polymerase Rpb3/Rpb11 dimerisation domain)	sp|Q3T0Q3|RPB3_BOVIN(DNA-directed RNA polymerase II subunit RPB3 OS=Bos taurus OX=9913 GN=POLR2C PE=1 SV=1)	114123790
gene-LOC114126361	yes|down	1	gene-LOC114126361	LOC114126361	small G protein signaling modulator 2-like, transcript variant X1	3781	385	388	309	146	67	82	5.7	5.68	4.37	2.25	1.06	1.22	5.25	1.51	0.348806	-1.5195	2.42e-07	1.11e-05	yes	down	XP_027846097.1(small G protein signaling modulator 2-like isoform X1 [Aphis gossypii])	0	K21847	SGSM1, RUTBC2	0	COG5210(S:Function unknown)	COG5210(TBC1 domain family member)	PF12068.9(PH_RBD:Rab-binding domain (RBD)); PF02759.20(RUN:RUN domain); PF00566.19(RabGAP-TBC:Rab-GTPase-TBC domain)	sp|Q2NKQ1|SGSM1_HUMAN(Small G protein signaling modulator 1 OS=Homo sapiens OX=9606 GN=SGSM1 PE=1 SV=2)	114126361
gene-LOC114130688	yes|down	1	gene-LOC114130688	LOC114130688	uncharacterized LOC114130688	1470	57	156	223	37	24	19	2.55	7.03	9.71	1.78	1.1	0.82	6.43	1.23333	0.229739	-2.12193	0.000231388	0.00392472	yes	down	XP_027851517.1(uncharacterized protein LOC114130688 [Aphis gossypii])	0	0	0	0	0	0	0	0	114130688
gene-LOC114118967	yes|down	1	gene-LOC114118967	LOC114118967	uncharacterized LOC114118967	3420	185	180	119	0	0	0	3.01	2.91	1.85	0	0	0	2.59	0	0.00149036	-9.39013	1.76e-14	3.03e-12	yes	down	XP_027836212.1(uncharacterized protein LOC114118967 [Aphis gossypii])	0	0	0	0	ENOG410Y7Q4(S:Function unknown); ENOG410YP2D(S:Function unknown); ENOG410Z1QR(S:Function unknown); COG2801(L:Replication, recombination and repair)	ENOG410Y7Q4(-); ENOG410YP2D(Integrase core domain protein); ENOG410Z1QR(-); COG2801(Retrotransposon protein)	PF05380.14(Peptidase_A17:Pao retrotransposon peptidase); PF03564.16(DUF1759:Protein of unknown function (DUF1759)); PF05585.13(DUF1758:Putative peptidase (DUF1758))	0	114118967
gene-LOC114127281	yes|up	1	gene-LOC114127281	LOC114127281	protein URE2-like	952	5	9	8	25	28	23	0.38	0.68	0.58	2	2.28	1.75	0.546667	2.01	4.47864	2.16306	7.85e-05	0.00163874	yes	up	XP_027847273.1(protein URE2-like [Aphis gossypii])	GO:0016021(cellular_component:integral component of membrane)	0	0	0	0	0	0	0	114127281
gene-LOC114131812	yes|up	1	gene-LOC114131812	LOC114131812	cartilage oligomeric matrix protein-like	1313	921	619	344	1309	1005	653	47.35	30.81	16.76	69.25	54.11	33.56	31.64	52.3067	2.06558	1.04655	0.00548553	0.0449633	yes	up	XP_027852919.1(cartilage oligomeric matrix protein-like [Aphis gossypii])	GO:0030246(molecular_function:carbohydrate binding); GO:0005576(cellular_component:extracellular region); GO:0005509(molecular_function:calcium ion binding); GO:0007155(biological_process:cell adhesion); GO:0005520(molecular_function:insulin-like growth factor binding); GO:0008201(molecular_function:heparin binding)	K04659	THBS2S	map05165(Human papillomavirus infection); map05144(Malaria); map04512(ECM-receptor interaction); map04510(Focal adhesion); map04145(Phagosome); map04151(PI3K-Akt signaling pathway)	ENOG410XQKE(O:Posttranslational modification, protein turnover, chaperones)	ENOG410XQKE(thrombospondin)	PF05735.13(TSP_C:Thrombospondin C-terminal region); PF02412.19(TSP_3:Thrombospondin type 3 repeat)	sp|P35445|COMP_BOVIN(Cartilage oligomeric matrix protein OS=Bos taurus OX=9913 GN=COMP PE=1 SV=2)	114131812
gene-LOC114128937	yes|up	1	gene-LOC114128937	LOC114128937	3'(2'),5'-bisphosphate nucleotidase 1, transcript variant X2	1377	357	233	185	408	478	332	17.21	11.14	8.5	20.18	24.28	15.66	12.2833	20.04	2.07996	1.05655	0.00030958	0.00495846	yes	up	KAF0760093.1(3'(2'),5'-bisphosphate nucleotidase 1 [Aphis craccivora])	GO:0046855(biological_process:inositol phosphate dephosphorylation); GO:0046854(biological_process:phosphatidylinositol phosphorylation)	K01082	cysQ, MET22, BPNT1	map00920(Sulfur metabolism)	ENOG410XNMV(G:Carbohydrate transport and metabolism)	ENOG410XNMV(3'(2'), 5'-bisphosphate nucleotidase 1)	PF00459.26(Inositol_P:Inositol monophosphatase family)	sp|Q3ZCK3|BPNT1_BOVIN(3'(2'),5'-bisphosphate nucleotidase 1 OS=Bos taurus OX=9913 GN=BPNT1 PE=2 SV=1)	114128937
gene-LOC114121160	yes|down	1	gene-LOC114121160	LOC114121160	neuroendocrine convertase 1-like	2476	1133	1658	1359	671	416	327	26.39	38.3	30.21	16.35	10.32	7.6	31.6333	11.4233	0.433259	-1.2067	8e-05	0.00165094	yes	down	XP_027839169.1(neuroendocrine convertase 1-like [Aphis gossypii])	GO:0004252(molecular_function:serine-type endopeptidase activity)	K01359	PCSK1	0	COG4935(O:Posttranslational modification, protein turnover, chaperones)	COG4935(proprotein convertase subtilisin kexin type)	PF00082.23(Peptidase_S8:Subtilase family); PF01483.21(P_proprotein:Proprotein convertase P-domain); PF16470.6(S8_pro-domain:Peptidase S8 pro-domain)	sp|P63240|NEC1_MUSCO(Neuroendocrine convertase 1 OS=Mus cookii OX=10098 GN=Pcsk1 PE=2 SV=1)	114121160
gene-LOC114121161	yes|down	1	gene-LOC114121161	LOC114121161	neuroendocrine convertase 1-like, transcript variant X1	2076	103	191	163	53	35	22	3.05	5.49	4.64	1.69	1.06	0.63	4.39333	1.12667	0.305281	-1.71179	7.08e-05	0.00149976	yes	down	XP_027839170.1(neuroendocrine convertase 1-like isoform X1 [Aphis gossypii])	GO:0004252(molecular_function:serine-type endopeptidase activity)	K01359	PCSK1	0	COG4935(O:Posttranslational modification, protein turnover, chaperones)	COG4935(proprotein convertase subtilisin kexin type)	PF00082.23(Peptidase_S8:Subtilase family); PF01483.21(P_proprotein:Proprotein convertase P-domain)	sp|P28840|NEC1_RAT(Neuroendocrine convertase 1 OS=Rattus norvegicus OX=10116 GN=Pcsk1 PE=2 SV=1)	114121161
gene-LOC114126694	yes|down	1	gene-LOC114126694	LOC114126694	uncharacterized LOC114126694	1638	362.2	553.93	355.07	99.91	61.31	25.45	8.55	12.44	7.71	2.27	1.71	0.54	9.56667	1.50667	0.185818	-2.42804	1.83e-07	8.76e-06	yes	down	XP_027846496.1(uncharacterized protein LOC114126694 [Aphis gossypii])	0	0	0	0	0	0	0	0	114126694
gene-LOC114128822	yes|up	1	gene-LOC114128822	LOC114128822	uncharacterized LOC114128822	1212	282.54	326	261.6	809	849	894	15.6	17.79	13.74	46.59	49.74	49.01	15.71	48.4467	3.81892	1.93316	1.15e-23	4.89e-21	yes	up	XP_027849206.1(uncharacterized protein LOC114128822 [Aphis gossypii])	0	0	0	0	0	0	0	0	114128822
gene-LOC114124566	yes|up	1	gene-LOC114124566	LOC114124566	protein YIPF5	1092	723.05	738.77	728.33	1188.41	1500.4	1486.27	45.89	46.31	43.94	78.62	100.96	93.54	45.38	91.04	2.4949	1.31898	5.55e-10	4.28e-08	yes	up	XP_027843663.1(protein YIPF5 [Aphis gossypii])	GO:0016021(cellular_component:integral component of membrane)	K20363	YIPF5_7, YIP1	0	COG5080(U:Intracellular trafficking, secretion, and vesicular transport); COG5239(U:Intracellular trafficking, secretion, and vesicular transport)	COG5080(yip1 domain family member); COG5239(yip1 domain family member)	PF04893.18(Yip1:Yip1 domain)	sp|Q6P5I8|YIPF5_DANRE(Protein YIPF5 OS=Danio rerio OX=7955 GN=yipf5 PE=2 SV=1)	114124566
gene-LOC114122949	yes|down	1	gene-LOC114122949	LOC114122949	dynein light chain roadblock-type 2-like	1140	35.1	35	23	3	3	11	2.1	2.07	1.31	0.19	0.19	0.65	1.82667	0.343333	0.240227	-2.05753	0.00272289	0.0263352	yes	down	XP_027841559.1(dynein light chain roadblock-type 2-like [Aphis gossypii])	GO:0005737(cellular_component:cytoplasm); GO:0007018(biological_process:microtubule-based movement); GO:0045505(molecular_function:dynein intermediate chain binding); GO:0005868(cellular_component:cytoplasmic dynein complex); GO:0005874(cellular_component:microtubule); GO:0003774(molecular_function:motor activity)	K10419	DYNLRB, DNCL2	map05132(Salmonella infection)	ENOG4111NDV(U:Intracellular trafficking, secretion, and vesicular transport)	ENOG4111NDV(trafficking protein particle complex)	PF03259.18(Robl_LC7:Roadblock/LC7 domain); PF16672.6(LAMTOR5:Ragulator complex protein LAMTOR5)	sp|Q9DAJ5|DLRB2_MOUSE(Dynein light chain roadblock-type 2 OS=Mus musculus OX=10090 GN=Dynlrb2 PE=1 SV=1)	114122949
gene-LOC114124217	yes|down	1	gene-LOC114124217	LOC114124217	uncharacterized LOC114124217	1570	37	23	13	0	0	0	1.47	0.91	0.49	0	0	0	0.956667	0	0.0100111	-6.64225	2.13e-06	7.69e-05	yes	down	XP_027843206.1(uncharacterized protein LOC114124217, partial [Aphis gossypii])	GO:0005634(cellular_component:nucleus); GO:0003677(molecular_function:DNA binding)	0	0	0	ENOG4111YDA(S:Function unknown); ENOG410ZQ61(S:Function unknown); ENOG41120I4(S:Function unknown)	ENOG4111YDA(-); ENOG410ZQ61(-); ENOG41120I4(helix-turn-helix, Psq domain)	PF03184.20(DDE_1:DDE superfamily endonuclease); PF03221.17(HTH_Tnp_Tc5:Tc5 transposase DNA-binding domain); PF05225.17(HTH_psq:helix-turn-helix, Psq domain)	sp|Q96MW7|TIGD1_HUMAN(Tigger transposable element-derived protein 1 OS=Homo sapiens OX=9606 GN=TIGD1 PE=1 SV=1)	114124217
gene-ND1	yes|down	1	gene-ND1	ND1	NADH dehydrogenase subunit 1	936	227	166	151	52	55	51	17.88	12.89	11.29	4.27	4.59	3.97	14.02	4.27667	0.380999	-1.39214	7.11e-08	3.75e-06	yes	down	YP_073308.1(NADH dehydrogenase subunit 1 [Schizaphis graminum])	GO:0008137(molecular_function:NADH dehydrogenase (ubiquinone) activity); GO:0016021(cellular_component:integral component of membrane); GO:0005743(cellular_component:mitochondrial inner membrane)	K03878	ND1	map04714(Thermogenesis); map04723(Retrograde endocannabinoid signaling); map05208(Chemical carcinogenesis - reactive oxygen species); map05012(Parkinson disease); map05010(Alzheimer disease); map05016(Huntington disease); map05014(Amyotrophic lateral sclerosis); map05415(Diabetic cardiomyopathy); map00190(Oxidative phosphorylation); map05022(Pathways of neurodegeneration - multiple diseases); map…	COG1005(C:Energy production and conversion)	COG1005(NDH-1 shuttles electrons from NADH, via FMN and iron- sulfur (Fe-S) centers, to quinones in the respiratory chain. The immediate electron acceptor for the enzyme in this species is believed to be ubiquinone. Couples the redox reaction to proton translocation (for every two electrons transferred, four hydrogen ions are translocated across the cytoplasmic membrane), and thus conserves the r…	0	sp|O63623|NU1M_DALCH(NADH-ubiquinone oxidoreductase chain 1 OS=Dalbulus charlesi OX=74059 GN=MT-ND1 PE=3 SV=1)	19909111
gene-LOC114126543	yes|up	1	gene-LOC114126543	LOC114126543	uncharacterized LOC114126543	1727	820	1038	375	1589	2195	1564	29.05	36.43	12.67	58.82	82.72	55.2	26.05	65.58	3.16491	1.66216	2.16e-05	0.000560241	yes	up	XP_027846316.1(uncharacterized protein LOC114126543 [Aphis gossypii])	0	0	0	0	ENOG4111JCS(S:Function unknown)	ENOG4111JCS(Haemolymph juvenile hormone binding protein (JHBP))	PF06585.12(JHBP:Haemolymph juvenile hormone binding protein (JHBP))	0	114126543
gene-LOC114124210	yes|down	1	gene-LOC114124210	LOC114124210	uncharacterized LOC114124210	1769	265	274	243	110	61	129	9.12	9.34	7.97	3.96	2.23	4.42	8.81	3.53667	0.495114	-1.01417	0.000790762	0.0102062	yes	down	XP_027843202.1(uncharacterized protein LOC114124210 [Aphis gossypii])	GO:0016021(cellular_component:integral component of membrane); GO:0019991(biological_process:septate junction assembly)	0	0	0	ENOG41120UX(S:Function unknown); ENOG410ZF2M(S:Function unknown)	ENOG41120UX(-); ENOG410ZF2M(-)	0	0	114124210
gene-LOC114128014	yes|down	1	gene-LOC114128014	LOC114128014	LHFPL tetraspan subfamily member 1 protein-like	1099	194	283	243	105	71	72	10.58	14.56	12.32	5.95	3.98	3.94	12.4867	4.62333	0.440747	-1.18198	3.59e-05	0.000853057	yes	down	XP_027848220.1(LHFPL tetraspan subfamily member 1 protein-like, partial [Aphis gossypii])	GO:0016021(cellular_component:integral component of membrane)	K23893	LHFPL	0	ENOG410XSUB(S:Function unknown)	ENOG410XSUB()-reductase)	PF10242.10(L_HMGIC_fpl:Lipoma HMGIC fusion partner-like protein)	sp|Q86WI0|LHPL1_HUMAN(LHFPL tetraspan subfamily member 1 protein OS=Homo sapiens OX=9606 GN=LHFPL1 PE=1 SV=1)	114128014
gene-LOC114128012	yes|down	1	gene-LOC114128012	LOC114128012	uncharacterized LOC114128012	720	370	271	212	0	0	0	43.78	31.48	23.71	0	0	0	32.99	0	0.000849851	-10.2005	5.42e-17	1.27e-14	yes	down	XP_027848219.1(uncharacterized protein LOC114128012, partial [Aphis gossypii])	0	0	0	0	ENOG4110S68(S:Function unknown); ENOG410YP2D(S:Function unknown); ENOG410Z1QR(S:Function unknown); ENOG410Y7Q4(S:Function unknown)	ENOG4110S68(-); ENOG410YP2D(Integrase core domain protein); ENOG410Z1QR(-); ENOG410Y7Q4(-)	PF03564.16(DUF1759:Protein of unknown function (DUF1759))	0	114128012
gene-LOC114128011	yes|down	1	gene-LOC114128011	LOC114128011	glycoprotein 3-alpha-L-fucosyltransferase A-like	2568	216.62	322.27	208	77	54	67	4.57	6.46	4.43	1.8	1.29	1.49	5.15333	1.52667	0.34124	-1.55114	1.75e-07	8.51e-06	yes	down	KAE9524576.1(hypothetical protein AGLY_014626 [Aphis glycines])	GO:0032580(cellular_component:Golgi cisterna membrane); GO:0016021(cellular_component:integral component of membrane); GO:0006486(biological_process:protein glycosylation); GO:0008417(molecular_function:fucosyltransferase activity)	K00753	E2.4.1.214	map00513(Various types of N-glycan biosynthesis)	ENOG410ZIMX(U:Intracellular trafficking, secretion, and vesicular transport)	ENOG410ZIMX(Snurportin 1)	PF00852.20(Glyco_transf_10:Glycosyltransferase family 10 (fucosyltransferase) C-term); PF17039.6(Glyco_tran_10_N:Fucosyltransferase, N-terminal)	sp|Q9VUL9|FUCTA_DROME(Glycoprotein 3-alpha-L-fucosyltransferase A OS=Drosophila melanogaster OX=7227 GN=FucTA PE=2 SV=2)	114128011
gene-LOC114126661	yes|up	1	gene-LOC114126661	LOC114126661	0	3150	1875	1280	678	1886	2681	2454	31.71	21.43	11.09	33.66	48.34	41.81	21.41	41.27	2.45387	1.29506	0.000443158	0.00652538	yes	up	KAE9541214.1(hypothetical protein AGLY_004459 [Aphis glycines])	0	0	0	0	ENOG4111BNN(S:Function unknown)	ENOG4111BNN(-)	0	0	114126661
gene-LOC114126069	yes|down	1	gene-LOC114126069	LOC114126069	tyrosine-protein kinase transmembrane receptor Ror-like, transcript variant X1	4198	5267	6146	5111	1975	1557	1691	188.47	238.63	185.89	50.32	42.63	40.28	204.33	44.41	0.408205	-1.29264	2.69e-16	5.62e-14	yes	down	XP_027845746.1(tyrosine-protein kinase transmembrane receptor Ror-like isoform X1 [Aphis gossypii])	GO:0007169(biological_process:transmembrane receptor protein tyrosine kinase signaling pathway); GO:0004714(molecular_function:transmembrane receptor protein tyrosine kinase activity); GO:0016021(cellular_component:integral component of membrane); GO:0005524(molecular_function:ATP binding)	K05122	ROR1, NTRKR1	map04310(Wnt signaling pathway)	COG0515(S:Function unknown); ENOG410YGKQ(T:Signal transduction mechanisms)	COG0515(-); ENOG410YGKQ(neurotrophic tyrosine kinase, receptor, type)	PF07714.18(PK_Tyr_Ser-Thr:Protein tyrosine and serine/threonine kinase); PF00069.26(Pkinase:Protein kinase domain); PF07679.17(I-set:Immunoglobulin I-set domain); PF13927.7(Ig_3:Immunoglobulin domain); PF00051.19(Kringle:Kringle domain); PF01392.23(Fz:Fz domain); PF13895.7(Ig_2:Immunoglobulin domain); PF07686.18(V-set:Immunoglobulin V-set domain)	sp|Q01973|ROR1_HUMAN(Inactive tyrosine-protein kinase transmembrane receptor ROR1 OS=Homo sapiens OX=9606 GN=ROR1 PE=1 SV=2)	114126069
gene-LOC114122017	yes|down	1	gene-LOC114122017	LOC114122017	0	1710	52.41	70.53	78.5	23.63	21.71	21.42	2.86	3.59	3.74	0.86	0.85	0.74	3.39667	0.816667	0.426877	-1.22811	0.00141681	0.0159227	yes	down	XP_027840352.1(vesicular glutamate transporter 2-like [Aphis gossypii])	GO:0016021(cellular_component:integral component of membrane)	K12302	SLC17A6_7_8	map04724(Glutamatergic synapse); map04723(Retrograde endocannabinoid signaling); map04721(Synaptic vesicle cycle); map05033(Nicotine addiction)	0	0	0	0	114122017
gene-LOC114126060	yes|up	1	gene-LOC114126060	LOC114126060	pickpocket protein 28-like	1566	1	0	0	24	10	19	0.04	0	0	1.25	0.52	0.92	0.0133333	0.896667	63.1025	5.97963	1.25e-05	0.000353591	yes	up	XP_027845736.1(pickpocket protein 28-like [Aphis gossypii])	GO:0016021(cellular_component:integral component of membrane); GO:0005272(molecular_function:sodium channel activity)	K03440	ASICN	0	ENOG410ZNFK(S:Function unknown)	ENOG410ZNFK(acid-sensing (proton-gated) ion channel)	PF00858.25(ASC:Amiloride-sensitive sodium channel)	sp|Q86LG1|PPK28_DROME(Pickpocket protein 28 OS=Drosophila melanogaster OX=7227 GN=ppk28 PE=1 SV=2)	114126060
gene-LOC114123010	yes|down	1	gene-LOC114123010	LOC114123010	glycine receptor subunit alpha-4-like	1260	51	60	50	14	16	9	2.49	2.9	2.41	0.77	0.82	0.4	2.6	0.663333	0.314497	-1.66888	9.27e-05	0.00184811	yes	down	XP_027841655.1(glycine receptor subunit alpha-4-like [Aphis gossypii])	GO:0005230(molecular_function:extracellular ligand-gated ion channel activity); GO:0016021(cellular_component:integral component of membrane); GO:0004888(molecular_function:transmembrane signaling receptor activity); GO:0005886(cellular_component:plasma membrane)	K05181;K05190	GABRB;GABRR	map04080(Neuroactive ligand-receptor interaction); map04727(GABAergic synapse); map04726(Serotonergic synapse); map04723(Retrograde endocannabinoid signaling); map05032(Morphine addiction); map05033(Nicotine addiction)	ENOG410XP43(S:Function unknown)	ENOG410XP43(Spastic paraplegia 21 (Autosomal recessive, Mast syndrome))	PF02931.24(Neur_chan_LBD:Neurotransmitter-gated ion-channel ligand binding domain); PF02932.17(Neur_chan_memb:Neurotransmitter-gated ion-channel transmembrane region)	sp|P24045|GBRB4_CHICK(Gamma-aminobutyric acid receptor subunit beta-4 OS=Gallus gallus OX=9031 GN=GABRB4 PE=2 SV=1)	114123010
gene-LOC114130459	yes|down	1	gene-LOC114130459	LOC114130459	uncharacterized LOC114130459	1243	47138	74404	63669	26826	21109	20814	2517.93	3929.18	3236.09	1494.91	1196.83	1104.29	3227.73	1265.34	0.475409	-1.07276	1.51e-05	0.000415615	yes	down	XP_027851238.1(uncharacterized protein LOC114130459 [Aphis gossypii])	0	0	0	0	0	0	0	0	114130459
gene-LOC114123016	yes|up	1	gene-LOC114123016	LOC114123016	cuticle protein 8-like, transcript variant X1	1846	58	79	67	120	204	211	5.84	7.69	6.24	12.39	21.64	20.51	6.59	18.18	3.44414	1.78414	1.21e-06	4.64e-05	yes	up	XP_027841659.1(cuticle protein 8-like isoform X1 [Aphis gossypii])	GO:0042302(molecular_function:structural constituent of cuticle)	0	0	0	ENOG410YXZN(S:Function unknown); ENOG410YXTN(S:Function unknown)	ENOG410YXZN(Cuticular protein); ENOG410YXTN(Cuticular protein)	PF00379.24(Chitin_bind_4:Insect cuticle protein)	sp|P11734|CU08_LOCMI(Cuticle protein 8 OS=Locusta migratoria OX=7004 PE=1 SV=1)	114123016
gene-LOC114132425	yes|down	1	gene-LOC114132425	LOC114132425	ATP-binding cassette sub-family G member 4-like, transcript variant X4	1996	945	924	748	380	287	301	25.42	25.08	19.73	10.64	8.31	8.32	23.41	9.09	0.479423	-1.06063	5.66e-11	5.47e-09	yes	down	XP_027853682.1(ATP-binding cassette sub-family G member 4-like isoform X1 [Aphis gossypii])	GO:0016021(cellular_component:integral component of membrane); GO:0016887(molecular_function:ATPase activity); GO:0005524(molecular_function:ATP binding)	K05680;K05679	ABCG4;ABCG1	map05417(Lipid and atherosclerosis); map02010(ABC transporters)	COG1131(V:Defense mechanisms)	COG1131((ABC) transporter)	PF01061.25(ABC2_membrane:ABC-2 type transporter); PF00005.28(ABC_tran:ABC transporter); PF12698.8(ABC2_membrane_3:ABC-2 family transporter protein); PF19055.1(ABC2_membrane_7:ABC-2 type transporter); PF02463.20(SMC_N:RecF/RecN/SMC N terminal domain)	sp|Q9H172|ABCG4_HUMAN(ATP-binding cassette sub-family G member 4 OS=Homo sapiens OX=9606 GN=ABCG4 PE=1 SV=2)	114132425
gene-LOC114127004	yes|up	1	gene-LOC114127004	LOC114127004	glucose dehydrogenase [FAD, quinone]-like, transcript variant X2	2946	1360	436	188	2427	2899	1532	31.04	9.91	4.09	58.33	71.07	36.31	15.0133	55.2367	4.70208	2.2333	0.000203516	0.0035354	yes	up	XP_027846919.1(glucose dehydrogenase [FAD, quinone]-like [Aphis gossypii])	GO:0016021(cellular_component:integral component of membrane); GO:0050660(molecular_function:flavin adenine dinucleotide binding); GO:0016614(molecular_function:oxidoreductase activity, acting on CH-OH group of donors)	0	0	0	COG2303(E:Amino acid transport and metabolism)	COG2303(oxidoreductase)	PF00732.20(GMC_oxred_N:GMC oxidoreductase); PF05199.14(GMC_oxred_C:GMC oxidoreductase)	sp|P18173|DHGL_DROME(Glucose dehydrogenase [FAD, quinone] OS=Drosophila melanogaster OX=7227 GN=Gld PE=3 SV=3)	114127004
gene-LOC114128713	yes|up	1	gene-LOC114128713	LOC114128713	adenine phosphoribosyltransferase-like, transcript variant X2	635	49.24	49.85	48.15	79.67	113.76	149.06	5.62	5.56	4.85	12.17	17	19.97	5.34333	16.38	3.06645	1.61657	7.41e-06	0.000227867	yes	up	XP_027849090.1(uncharacterized protein LOC114128713 [Aphis gossypii])	GO:0005737(cellular_component:cytoplasm); GO:0006168(biological_process:adenine salvage); GO:0003999(molecular_function:adenine phosphoribosyltransferase activity); GO:0009116(biological_process:nucleoside metabolic process)	K00759	APRT, apt	map00230(Purine metabolism)	COG0503(F:Nucleotide transport and metabolism)	COG0503(Catalyzes a salvage reaction resulting in the formation of AMP, that is energically less costly than de novo synthesis (By similarity))	0	sp|A1B843|APT_PARDP(Adenine phosphoribosyltransferase OS=Paracoccus denitrificans (strain Pd 1222) OX=318586 GN=apt PE=3 SV=1)	114128713
gene-LOC114132748	yes|down	1	gene-LOC114132748	LOC114132748	uncharacterized LOC114132748, transcript variant X1	1320	71	50	49	19	20	24	2.82	1.96	1.8	0.56	0.63	0.75	2.19333	0.646667	0.486025	-1.0409	0.0047853	0.0406732	yes	down	XP_027854097.1(uncharacterized protein LOC114132748 isoform X1 [Aphis gossypii])	0	0	0	0	ENOG41102NY(S:Function unknown)	ENOG41102NY(U3 small nucleolar RNA-associated protein)	PF02752.23(Arrestin_C:Arrestin (or S-antigen), C-terminal domain); PF00339.30(Arrestin_N:Arrestin (or S-antigen), N-terminal domain)	0	114132748
gene-LOC114130788	yes|up	1	gene-LOC114130788	LOC114130788	calcineurin subunit B type 2, transcript variant X1	1631	44.85	48.89	25.31	323.53	307.96	300.38	2.21	2.43	1.04	13.66	13.01	11.96	1.89333	12.8767	10.2312	3.3549	5.9e-34	4.52e-31	yes	up	NP_001155538.1(calcineurin B-like [Acyrthosiphon pisum])	GO:0005509(molecular_function:calcium ion binding)	K06268	PPP3R, CNB	map05166(Human T-cell leukemia virus 1 infection); map05167(Kaposi sarcoma-associated herpesvirus infection); map04650(Natural killer cell mediated cytotoxicity); map04114(Oocyte meiosis); map05163(Human cytomegalovirus infection); map04659(Th17 cell differentiation); map04658(Th1 and Th2 cell differentiation); map04010(MAPK signaling pathway); map04360(Axon guidance); map04218(Cellular senescenc…	COG5126(D:Cell cycle control, cell division, chromosome partitioning); COG5126(T:Signal transduction mechanisms); COG5126(Z:Cytoskeleton)	COG5126(Calcium-binding protein); COG5126(Calcium-binding protein); COG5126(Calcium-binding protein)	PF00036.33(EF-hand_1:EF hand); PF13499.7(EF-hand_7:EF-hand domain pair); PF13405.7(EF-hand_6:EF-hand domain); PF13833.7(EF-hand_8:EF-hand domain pair); PF13202.7(EF-hand_5:EF hand); PF12763.8(EF-hand_4:Cytoskeletal-regulatory complex EF hand); PF10591.10(SPARC_Ca_bdg:Secreted protein acidic and rich in cysteine Ca binding region)	sp|Q24214|CANB2_DROME(Calcineurin subunit B type 2 OS=Drosophila melanogaster OX=7227 GN=CanB2 PE=1 SV=2)	114130788
gene-LOC114126144	yes|down	1	gene-LOC114126144	LOC114126144	uncharacterized LOC114126144	468	20	8	11	0	0	1	7.02	3.1	4.6	0	0	0.27	4.90667	0.09	0.0363977	-4.78001	0.0010433	0.012656	yes	down	XP_027845829.1(uncharacterized protein LOC114126144 [Aphis gossypii])	0	K11153	RDH12	map00830(Retinol metabolism); map01240(Biosynthesis of cofactors)	COG1028(S:Function unknown)	COG1028(Dehydrogenase reductase)	0	0	114126144
gene-LOC114129656	yes|up	1	gene-LOC114129656	LOC114129656	thiamine transporter 1-like	685	162.09	71	182.34	293	319.85	423.52	11.1	4.74	12.61	24.16	26.67	33.57	9.48333	28.1333	3.27319	1.7107	1.53e-05	0.000418035	yes	up	XP_027850253.1(thiamine transporter 1-like [Aphis gossypii])	GO:0090482(molecular_function:vitamin transmembrane transporter activity); GO:0016021(cellular_component:integral component of membrane)	K14610	SLC19A2_3, THTR	map04977(Vitamin digestion and absorption)	ENOG410XT34(P:Inorganic ion transport and metabolism)	ENOG410XT34(reduced folate carrier activity)	PF01770.19(Folate_carrier:Reduced folate carrier)	sp|O60779|S19A2_HUMAN(Thiamine transporter 1 OS=Homo sapiens OX=9606 GN=SLC19A2 PE=1 SV=2)	114129656
gene-LOC114127766	yes|down	1	gene-LOC114127766	LOC114127766	ras-like GTP-binding protein RHO, transcript variant X1	1562	35	31	31	2	6	10	1.41	1.22	1.19	0.08	0.26	0.4	1.27333	0.246667	0.244955	-2.02941	0.0014613	0.0163154	yes	down	XP_027847886.1(ras-like GTP-binding protein RHO [Aphis gossypii])	GO:0007264(biological_process:small GTPase mediated signal transduction); GO:0003924(molecular_function:GTPase activity); GO:0005525(molecular_function:GTP binding)	K04513	RHOA	map05210(Colorectal cancer); map05418(Fluid shear stress and atherosclerosis); map05206(MicroRNAs in cancer); map04015(Rap1 signaling pathway); map04014(Ras signaling pathway); map04350(TGF-beta signaling pathway); map04270(Vascular smooth muscle contraction); map04022(cGMP-PKG signaling pathway); map04072(Phospholipase D signaling pathway); map04071(Sphingolipid signaling pathway); map05203(Vira…	COG1100(S:Function unknown)	COG1100(GTP-binding Protein)	PF00071.23(Ras:Ras family); PF08477.14(Roc:Ras of Complex, Roc, domain of DAPkinase); PF00025.22(Arf:ADP-ribosylation factor family); PF04670.13(Gtr1_RagA:Gtr1/RagA G protein conserved region)	sp|P61585|RHOA_BOVIN(Transforming protein RhoA OS=Bos taurus OX=9913 GN=RHOA PE=1 SV=1)	114127766
gene-LOC114128496	yes|down	1	gene-LOC114128496	LOC114128496	probable cytochrome P450 6a13	1628	66	116	88	33	25	21	2.51	4.37	3.19	1.31	1.01	0.8	3.35667	1.04	0.37465	-1.41638	0.000357044	0.00556612	yes	down	XP_027848818.1(probable cytochrome P450 6a13 [Aphis gossypii])	GO:0005506(molecular_function:iron ion binding); GO:0016705(molecular_function:oxidoreductase activity, acting on paired donors, with incorporation or reduction of molecular oxygen); GO:0016021(cellular_component:integral component of membrane); GO:0004497(molecular_function:monooxygenase activity); GO:0020037(molecular_function:heme binding)	K14999	CYP6	0	COG2124(Q:Secondary metabolites biosynthesis, transport and catabolism)	COG2124(Cytochrome p450)	PF00067.23(p450:Cytochrome P450)	sp|Q9V4U9|C6A13_DROME(Probable cytochrome P450 6a13 OS=Drosophila melanogaster OX=7227 GN=Cyp6a13 PE=2 SV=1)	114128496
gene-LOC114127912	yes|down	1	gene-LOC114127912	LOC114127912	uncharacterized LOC114127912	5728	1646	1684.4	1376	343	278.09	887	26.32	26.93	19.92	5.06	3.8	11.1	24.39	6.65333	0.419712	-1.25253	0.00515497	0.0429581	yes	down	XP_027848077.1(uncharacterized protein LOC114127912 [Aphis gossypii])	GO:0003676(molecular_function:nucleic acid binding)	K09228	KRAB	map05168(Herpes simplex virus 1 infection)	COG5048(L:Replication, recombination and repair)	COG5048(atp-dependent rna helicase)	PF13465.7(zf-H2C2_2:Zinc-finger double domain); PF00096.27(zf-C2H2:Zinc finger, C2H2 type); PF13894.7(zf-C2H2_4:C2H2-type zinc finger); PF12171.9(zf-C2H2_jaz:Zinc-finger double-stranded RNA-binding); PF12874.8(zf-met:Zinc-finger of C2H2 type)	0	114127912
gene-LOC114125362	yes|up	1	gene-LOC114125362	LOC114125362	glucose dehydrogenase [FAD, quinone]-like	2415	274	171	120	339	609	220	6.61	4.06	2.76	8.67	15.76	5.24	4.47667	9.89	2.77623	1.47313	0.00140745	0.0158994	yes	up	KAE9536381.1(hypothetical protein AGLY_007170 [Aphis glycines])	GO:0050660(molecular_function:flavin adenine dinucleotide binding); GO:0016614(molecular_function:oxidoreductase activity, acting on CH-OH group of donors)	0	0	0	COG2303(E:Amino acid transport and metabolism)	COG2303(oxidoreductase)	PF00732.20(GMC_oxred_N:GMC oxidoreductase); PF05199.14(GMC_oxred_C:GMC oxidoreductase); PF01266.25(DAO:FAD dependent oxidoreductase); PF01946.18(Thi4:Thi4 family)	sp|P18173|DHGL_DROME(Glucose dehydrogenase [FAD, quinone] OS=Drosophila melanogaster OX=7227 GN=Gld PE=3 SV=3)	114125362
gene-LOC114120935	yes|up	1	gene-LOC114120935	LOC114120935	ATP-binding cassette sub-family B member 7, mitochondrial-like	1104	54.03	40.04	7.63	175.14	184.43	186.6	3.38	2.47	0.45	11.42	12.23	11.57	2.1	11.74	7.14211	2.83635	2.03e-07	9.65e-06	yes	up	XP_027838839.1(ATP-binding cassette sub-family B member 7, mitochondrial-like [Aphis gossypii])	GO:0042626(molecular_function:ATPase activity, coupled to transmembrane movement of substances); GO:0016021(cellular_component:integral component of membrane); GO:0016887(molecular_function:ATPase activity); GO:0005524(molecular_function:ATP binding)	K05662	ABCB7, ATM	map02010(ABC transporters)	COG5265(V:Defense mechanisms)	COG5265(iron ion homeostasis)	PF00005.28(ABC_tran:ABC transporter); PF02463.20(SMC_N:RecF/RecN/SMC N terminal domain)	sp|Q704E8|ABCB7_RAT(ATP-binding cassette sub-family B member 7, mitochondrial OS=Rattus norvegicus OX=10116 GN=Abcb7 PE=1 SV=1)	114120935
gene-LOC114128085	yes|down	1	gene-LOC114128085	LOC114128085	multiple inositol polyphosphate phosphatase 1-like	1693	821	1339	824	243	144	74	26.63	43.49	25.59	8.04	4.85	2.62	31.9033	5.17	0.195885	-2.35192	3.66e-08	2.05e-06	yes	down	XP_027848310.1(multiple inositol polyphosphate phosphatase 1-like [Aphis gossypii])	0	K03103	MINPP1	map00010(Glycolysis / Gluconeogenesis); map00562(Inositol phosphate metabolism)	ENOG4111FS8(S:Function unknown)	ENOG4111FS8(PHOsphatase)	PF00328.23(His_Phos_2:Histidine phosphatase superfamily (branch 2))	sp|Q9UNW1|MINP1_HUMAN(Multiple inositol polyphosphate phosphatase 1 OS=Homo sapiens OX=9606 GN=MINPP1 PE=1 SV=1)	114128085
gene-LOC114124327	yes|down	1	gene-LOC114124327	LOC114124327	0	1386	294	350.08	417.26	50.6	129.99	72.41	13.74	16.33	19.15	2.45	6.5	3.34	16.4067	4.09667	0.314523	-1.66876	0.000112889	0.00218924	yes	down	XP_027843367.1(gamma-glutamyl hydrolase A-like isoform X2 [Aphis gossypii])	GO:0034722(molecular_function:gamma-glutamyl-peptidase activity)	K01307	GGH	map01523(Antifolate resistance); map00790(Folate biosynthesis); map01240(Biosynthesis of cofactors)	ENOG410XQKI(S:Function unknown)	ENOG410XQKI(Gamma-glutamyl hydrolase)	0	sp|Q54HL4|GGHB_DICDI(Gamma-glutamyl hydrolase B OS=Dictyostelium discoideum OX=44689 GN=gghB PE=3 SV=1)	114124327
gene-LOC114127628	yes|up	1	gene-LOC114127628	LOC114127628	lysosomal aspartic protease-like	1453	145	350	198	396	327	393	6.35	15.16	8.26	18.1	15.21	17.11	9.92333	16.8067	2.06429	1.04564	0.00515208	0.0429581	yes	up	XP_027847723.1(lysosomal aspartic protease-like [Aphis gossypii])	GO:0004190(molecular_function:aspartic-type endopeptidase activity)	K01379	CTSD	map05152(Tuberculosis); map04210(Apoptosis); map04142(Lysosome); map04071(Sphingolipid signaling pathway); map05415(Diabetic cardiomyopathy); map04915(Estrogen signaling pathway); map04140(Autophagy - animal)	ENOG410XNV7(O:Posttranslational modification, protein turnover, chaperones)	ENOG410XNV7(aspartic)	PF00026.24(Asp:Eukaryotic aspartyl protease); PF14543.7(TAXi_N:Xylanase inhibitor N-terminal)	sp|Q03168|ASPP_AEDAE(Lysosomal aspartic protease OS=Aedes aegypti OX=7159 GN=AAEL006169 PE=1 SV=2)	114127628
gene-LOC114129925	yes|up	1	gene-LOC114129925	LOC114129925	phenoloxidase 1-like	588	0	0	0	500.38	648.53	511.34	0	0	0	88.2	115.8	85.05	0	96.35	3943.13	11.9451	5.87e-23	2.18e-20	yes	up	XP_027850599.1(phenoloxidase 1-like [Aphis gossypii])	GO:0046872(molecular_function:metal ion binding); GO:0016491(molecular_function:oxidoreductase activity)	0	0	0	ENOG4111KTW(S:Function unknown)	ENOG4111KTW(prophenoloxidase)	PF03723.15(Hemocyanin_C:Hemocyanin, ig-like domain)	sp|Q8I6K1|PPO1_HOLDI(Phenoloxidase 1 OS=Holotrichia diomphalia OX=33394 GN=PPO1 PE=1 SV=1)	114129925
gene-LOC114123949	yes|up	1	gene-LOC114123949	LOC114123949	lisH domain-containing protein ARMC9-like	1401	3.25	0	0	11.51	14.77	4.41	0.15	0	0	0.55	0.72	0.2	0.05	0.49	13.9398	3.80114	0.00528099	0.0437143	yes	up	XP_027842894.1(lisH domain-containing protein ARMC9-like [Aphis gossypii])	GO:0036064(cellular_component:ciliary basal body); GO:0060271(biological_process:cilium assembly)	K22864	ARMC9	0	ENOG410YSH6(S:Function unknown)	ENOG410YSH6(Armadillo repeat containing 9)	0	sp|E7F187|ARMC9_DANRE(LisH domain-containing protein ARMC9 OS=Danio rerio OX=7955 GN=armc9 PE=2 SV=3)	114123949
gene-LOC114132086	yes|down	1	gene-LOC114132086	LOC114132086	uncharacterized LOC114132086	1191	11	10	12	0	0	0	0.62	0.56	0.64	0	0	0	0.606667	0	0.021699	-5.52623	0.000212819	0.0036638	yes	down	XP_027853277.1(uncharacterized protein LOC114132086 [Aphis gossypii])	0	0	0	0	ENOG410Z2SP(S:Function unknown); ENOG4110J77(S:Function unknown)	ENOG410Z2SP(-); ENOG4110J77(transposase yabusame-1)	PF13843.7(DDE_Tnp_1_7:Transposase IS4)	sp|Q96DM1|PGBD4_HUMAN(PiggyBac transposable element-derived protein 4 OS=Homo sapiens OX=9606 GN=PGBD4 PE=2 SV=3)	114132086
gene-LOC114128401	yes|up	1	gene-LOC114128401	LOC114128401	uncharacterized LOC114128401	719	1.85	10.79	0.94	49.54	39.49	54.43	0.22	1.26	0.11	6.1	4.93	6.35	0.53	5.79333	13.1496	3.71694	6.1e-07	2.53e-05	yes	up	XP_027848716.1(uncharacterized protein LOC114128401 [Aphis gossypii])	0	0	0	0	0	0	0	0	114128401
gene-LOC114128203	yes|down	1	gene-LOC114128203	LOC114128203	uncharacterized LOC114128203, transcript variant X1	693	44	33.82	23	1	7	6	5.67	4.27	2.8	0.13	0.95	0.76	4.24667	0.613333	0.185821	-2.42802	0.000635598	0.00869129	yes	down	XP_027848462.1(uncharacterized protein LOC114128203 isoform X1 [Aphis gossypii])	0	0	0	0	0	0	0	0	114128203
gene-LOC114132327	yes|down	1	gene-LOC114132327	LOC114132327	photoreceptor-specific nuclear receptor-like, transcript variant X1	2774	188	197	149	28	9	13	3.76	3.89	2.84	0.6	0.2	0.27	3.49667	0.356667	0.119711	-3.06237	1.35e-14	2.36e-12	yes	down	XP_027853555.1(photoreceptor-specific nuclear receptor-like isoform X1 [Aphis gossypii])	GO:0043565(molecular_function:sequence-specific DNA binding); GO:0003700(molecular_function:transcription factor activity, sequence-specific DNA binding); GO:0005634(cellular_component:nucleus); GO:0003707(molecular_function:steroid hormone receptor activity); GO:0008270(molecular_function:zinc ion binding); GO:0042025(cellular_component:host cell nucleus)	K08546	NR2E3, PNR	0	ENOG410XRZC(S:Function unknown)	ENOG410XRZC(SAP30 binding protein)	PF00104.31(Hormone_recep:Ligand-binding domain of nuclear hormone receptor); PF00105.19(zf-C4:Zinc finger, C4 type (two domains))	sp|Q9TTF0|NR2E3_BOVIN(Photoreceptor-specific nuclear receptor OS=Bos taurus OX=9913 GN=NR2E3 PE=1 SV=2)	114132327
gene-LOC114129974	yes|up	1	gene-LOC114129974	LOC114129974	6-pyruvoyl tetrahydrobiopterin synthase	734	54	41	46	168	203	170	6.19	4.61	4.98	19.98	24.51	19.16	5.26	21.2167	5.03112	2.33088	3.98e-18	1.02e-15	yes	up	XP_027850647.1(6-pyruvoyl tetrahydrobiopterin synthase [Aphis gossypii])	GO:0006729(biological_process:tetrahydrobiopterin biosynthetic process); GO:0003874(molecular_function:6-pyruvoyltetrahydropterin synthase activity)	K01737	queD, ptpS, PTS	map00790(Folate biosynthesis); map01240(Biosynthesis of cofactors)	COG0720(H:Coenzyme transport and metabolism)	COG0720(6-pyruvoyltetrahydropterin synthase activity)	PF01242.20(PTPS:6-pyruvoyl tetrahydropterin synthase); PF01704.19(UDPGP:UTP--glucose-1-phosphate uridylyltransferase)	sp|Q9R1Z7|PTPS_MOUSE(6-pyruvoyl tetrahydrobiopterin synthase OS=Mus musculus OX=10090 GN=Pts PE=1 SV=2)	114129974
gene-LOC114124963	yes|up	1	gene-LOC114124963	LOC114124963	deformed epidermal autoregulatory factor 1-like	467	0	0	0	31.04	12.89	25.95	0	0	0	9.05	3.79	7.08	0	6.64	162.401	7.34342	5.95e-08	3.18e-06	yes	up	XP_027844226.1(deformed epidermal autoregulatory factor 1 homolog [Aphis gossypii])	GO:0003714(molecular_function:transcription corepressor activity); GO:0046872(molecular_function:metal ion binding); GO:0045892(biological_process:negative regulation of transcription, DNA-templated); GO:0003677(molecular_function:DNA binding)	K23041	DEAF1	0	ENOG410ZMTP(K:Transcription)	ENOG410ZMTP(transcription coactivator activity)	PF01753.19(zf-MYND:MYND finger)	sp|Q24180|DEAF1_DROME(Deformed epidermal autoregulatory factor 1 OS=Drosophila melanogaster OX=7227 GN=Deaf1 PE=1 SV=1)	114124963
gene-LOC114127717	yes|down	1	gene-LOC114127717	LOC114127717	ejaculatory bulb-specific protein 3-like	786	448	688	934	283	187	301	45.96	69.41	90.73	30.17	20.24	30.43	68.7	26.9467	0.473711	-1.07792	0.00288211	0.0277126	yes	down	XP_027847842.1(ejaculatory bulb-specific protein 3-like [Aphis gossypii])	0	0	0	0	ENOG4111U5H(S:Function unknown)	ENOG4111U5H(protein serine threonine kinase)	PF03392.14(OS-D:Insect pheromone-binding family, A10/OS-D)	sp|Q9W1C9|PEB3_DROME(Ejaculatory bulb-specific protein 3 OS=Drosophila melanogaster OX=7227 GN=EbpIII PE=2 SV=2)	114127717
gene-LOC114128159	yes|down	1	gene-LOC114128159	LOC114128159	microtubule-associated serine/threonine-protein kinase 2-like	2218	282.34	371.66	749.57	156.6	120.14	137.99	7.46	9.73	18.89	4.32	3.38	3.64	12.0267	3.78	0.374944	-1.41525	0.000831446	0.0106258	yes	down	XP_027848404.1(microtubule-associated serine/threonine-protein kinase 2-like [Aphis gossypii])	GO:0004674(molecular_function:protein serine/threonine kinase activity); GO:0000287(molecular_function:magnesium ion binding); GO:0005524(molecular_function:ATP binding)	K08789	MAST	0	ENOG410XPWX(T:Signal transduction mechanisms)	ENOG410XPWX(microtubule associated serine threonine kinase)	PF17820.2(PDZ_6:PDZ domain); PF00595.25(PDZ:PDZ domain); PF13180.7(PDZ_2:PDZ domain)	sp|Q6P0Q8|MAST2_HUMAN(Microtubule-associated serine/threonine-protein kinase 2 OS=Homo sapiens OX=9606 GN=MAST2 PE=1 SV=2)	114128159
gene-LOC114120839	yes|down	1	gene-LOC114120839	LOC114120839	angiotensin-converting enzyme-like, transcript variant X1	2428	1355	1320	1410	395	232	295	55.02	52.55	51.22	11.15	6.18	7.89	52.93	8.40667	0.289581	-1.78796	1.02e-18	2.93e-16	yes	down	XP_027838688.1(angiotensin-converting enzyme-like isoform X1 [Aphis gossypii])	GO:0004180(molecular_function:carboxypeptidase activity); GO:0008241(molecular_function:peptidyl-dipeptidase activity); GO:0016020(cellular_component:membrane); GO:0003676(molecular_function:nucleic acid binding); GO:0046872(molecular_function:metal ion binding); GO:0008237(molecular_function:metallopeptidase activity)	K01283	ACE, CD143	map05142(Chagas disease); map04614(Renin-angiotensin system); map04924(Renin secretion); map05171(Coronavirus disease - COVID-19); map05415(Diabetic cardiomyopathy); map05410(Hypertrophic cardiomyopathy)	ENOG410XPJ3(G:Carbohydrate transport and metabolism)	ENOG410XPJ3(NADHX epimerase activity)	PF01401.19(Peptidase_M2:Angiotensin-converting enzyme)	sp|Q10751|ACE_CHICK(Angiotensin-converting enzyme (Fragment) OS=Gallus gallus OX=9031 GN=ACE PE=2 SV=1)	114120839
gene-LOC114131793	yes|up	1	gene-LOC114131793	LOC114131793	uncharacterized LOC114131793	1079	729	758	212	792	1285	1108	47.03	48.29	13	53.26	87.87	70.87	36.1067	70.6667	2.50774	1.32639	0.00508468	0.0424955	yes	up	XP_027852897.1(uncharacterized protein LOC114131793 [Aphis gossypii])	0	0	0	0	ENOG4112BKC(S:Function unknown)	ENOG4112BKC(-)	0	0	114131793
gene-LOC114129874	yes|up	1	gene-LOC114129874	LOC114129874	uncharacterized LOC114129874	917	0	1.46	0	5.82	3.85	7.74	0	0.07	0	0.49	0.22	0.54	0.0233333	0.416667	21.7062	4.44004	0.00456965	0.0394231	yes	up	XP_027850529.1(uncharacterized protein LOC114129874 [Aphis gossypii])	0	0	0	0	ENOG4110CDI(S:Function unknown)	ENOG4110CDI(tigger transposable element derived)	0	0	114129874
gene-LOC114120445	yes|up	1	gene-LOC114120445	LOC114120445	peroxidase-like	2160	1434	797	469	1687	2543	1943	35.81	19.03	10.96	42.46	66.36	48.07	21.9333	52.2967	3.07903	1.62248	4.74e-05	0.00106688	yes	up	XP_027838149.1(peroxidase-like [Aphis gossypii])	GO:0042600(cellular_component:chorion); GO:0020037(molecular_function:heme binding); GO:0016021(cellular_component:integral component of membrane); GO:0006979(biological_process:response to oxidative stress); GO:0048477(biological_process:oogenesis); GO:0004601(molecular_function:peroxidase activity)	K19511	PXDN, VPO1	0	ENOG410XPZ3(S:Function unknown)	ENOG410XPZ3(prostaglandin G H synthase and cyclooxygenase)	PF03098.16(An_peroxidase:Animal haem peroxidase)	sp|Q01603|PERO_DROME(Peroxidase OS=Drosophila melanogaster OX=7227 GN=Pxd PE=2 SV=2)	114120445
gene-LOC114124288	yes|up	1	gene-LOC114124288	LOC114124288	PXMP2/4 family protein 3	1027	606	421	418	644	923	795	39.27	26.78	25.38	43.15	61.94	50.75	30.4767	51.9467	2.16654	1.11539	1.76e-05	0.000468803	yes	up	XP_027843291.1(PXMP2/4 family protein 3 [Aphis gossypii])	GO:0016021(cellular_component:integral component of membrane)	K13347	PXMP2, PMP22	map04146(Peroxisome)	ENOG4111SYH(S:Function unknown)	ENOG4111SYH(Peroxisomal membrane protein)	PF04117.13(Mpv17_PMP22:Mpv17 / PMP22 family)	sp|Q54GD8|PX24C_DICDI(PXMP2/4 family protein 3 OS=Dictyostelium discoideum OX=44689 GN=DDB_G0290223 PE=3 SV=1)	114124288
gene-LOC114131223	yes|up	1	gene-LOC114131223	LOC114131223	uncharacterized LOC114131223	602	0	2	0	38	24	10	0	0.32	0	6.4	4.1	1.59	0.106667	4.03	45.7664	5.51622	1.58e-05	0.000432864	yes	up	XP_027852186.1(uncharacterized protein LOC114131223 [Aphis gossypii])	0	0	0	0	ENOG411206Y(S:Function unknown)	ENOG411206Y(transposon protein)	0	0	114131223
gene-LOC114125046	yes|down	1	gene-LOC114125046	LOC114125046	vacuolar protein sorting-associated protein 13A-like	10539	611.16	567	334	275.02	155	98.91	15.57	13.8	9.12	7.98	4.29	2.79	12.83	5.02	0.449928	-1.15223	0.00300192	0.0285779	yes	down	XP_027844322.1(LOW QUALITY PROTEIN: vacuolar protein sorting-associated protein 13A-like [Aphis gossypii])	0	K19525	VPS13A_C	0	ENOG4111F8I(S:Function unknown); COG5043(U:Intracellular trafficking, secretion, and vesicular transport)	ENOG4111F8I(-); COG5043(Vacuolar Protein)	PF16908.6(VPS13:Vacuolar sorting-associated protein 13, N-terminal); PF16910.6(VPS13_mid_rpt:Repeating coiled region of VPS13); PF12624.8(Chorein_N:N-terminal region of Chorein or VPS13); PF06650.13(SHR-BD:SHR-binding domain of vacuolar-sorting associated protein 13); PF16909.6(VPS13_C:Vacuolar-sorting-associated 13 protein C-terminal)	sp|Q96RL7|VP13A_HUMAN(Vacuolar protein sorting-associated protein 13A OS=Homo sapiens OX=9606 GN=VPS13A PE=1 SV=2)	114125046
gene-LOC114125373	yes|up	1	gene-LOC114125373	LOC114125373	glucose dehydrogenase [FAD, quinone]-like	2282	1281	289	154	2337	2721	985	32.74	7.32	3.76	62.46	74.07	25.12	14.6067	53.8833	4.78708	2.25915	0.00103362	0.0125917	yes	up	XP_027844789.1(glucose dehydrogenase [FAD, quinone]-like [Aphis gossypii])	GO:0050660(molecular_function:flavin adenine dinucleotide binding); GO:0016614(molecular_function:oxidoreductase activity, acting on CH-OH group of donors)	0	0	0	COG2303(S:Function unknown)	COG2303(Immunoglobulin V-set domain)	PF00732.20(GMC_oxred_N:GMC oxidoreductase); PF05199.14(GMC_oxred_C:GMC oxidoreductase); PF01266.25(DAO:FAD dependent oxidoreductase)	sp|P18173|DHGL_DROME(Glucose dehydrogenase [FAD, quinone] OS=Drosophila melanogaster OX=7227 GN=Gld PE=3 SV=3)	114125373
gene-LOC114125044	yes|down	1	gene-LOC114125044	LOC114125044	uncharacterized LOC114125044, transcript variant X1	601	162	269	224	78	15	34	26.48	42.97	34.46	13.18	2.57	5.43	34.6367	7.06	0.240799	-2.0541	0.000119006	0.00228475	yes	down	AGE97636.1(odorant binding protein 6 [Aphis gossypii])	GO:0005549(molecular_function:odorant binding)	0	0	0	ENOG410ZH43(S:Function unknown); ENOG41118W2(S:Function unknown)	ENOG410ZH43(Odorant-binding protein); ENOG41118W2(odorant-binding protein 58c)	PF01395.23(PBP_GOBP:PBP/GOBP family)	0	114125044
gene-LOC114120835	yes|down	1	gene-LOC114120835	LOC114120835	uncharacterized LOC114120835	1615	2152	3426	2359	1440	845	533	97.41	153.89	101.93	57.79	34.52	20.39	117.743	37.5667	0.449946	-1.15218	0.00210696	0.0216972	yes	down	XP_027838687.1(LOW QUALITY PROTEIN: uncharacterized protein LOC114120835 [Aphis gossypii])	0	0	0	0	0	0	0	0	114120835
gene-LOC114125040	yes|up	1	gene-LOC114125040	LOC114125040	uncharacterized LOC114125040	915	0	0	0	31	21	19	0	0	0	2.63	1.81	1.53	0	1.99	165.657	7.37205	2.24e-08	1.29e-06	yes	up	XP_027844316.1(uncharacterized protein LOC114125040 [Aphis gossypii])	0	0	0	0	0	0	0	0	114125040
gene-LOC114123729	yes|down	1	gene-LOC114123729	LOC114123729	uncharacterized LOC114123729	969	23891	31351	32211	10999	8668	6243	1790.87	2317.95	2292.48	858.6	687.87	463.21	2133.77	669.893	0.378998	-1.39974	1.72e-07	8.36e-06	yes	down	KAE9537521.1(hypothetical protein AGLY_006544, partial [Aphis glycines])	0	0	0	0	0	0	0	0	114123729
gene-LOC114130045	yes|up	1	gene-LOC114130045	LOC114130045	0	869	0	1	2	31	13	12	0	0.09	0.17	2.83	1.21	1.04	0.0866667	1.69333	23.449	4.55145	3.34e-05	0.000802202	yes	up	KAE9539545.1(hypothetical protein AGLY_004797 [Aphis glycines])	GO:0004185(molecular_function:serine-type carboxypeptidase activity)	K09645	CPVL	0	COG2939(E:Amino acid transport and metabolism)	COG2939(carboxy-peptidase)	0	sp|C9WMM5|VCP_APIME(Venom serine carboxypeptidase OS=Apis mellifera OX=7460 PE=2 SV=1)	114130045
gene-LOC114123831	yes|down	1	gene-LOC114123831	LOC114123831	protein pigeon, transcript variant X1	2990	252.87	190.27	168.62	80.13	78.87	68.26	5.88	4.41	3.75	1.88	1.73	1.48	4.68	1.69667	0.485673	-1.04194	1.28e-05	0.000358369	yes	down	XP_027842735.1(protein pigeon isoform X1 [Aphis gossypii])	0	0	0	0	ENOG41129DZ(S:Function unknown)	ENOG41129DZ(pigeon homolog (Drosophila))	PF14959.7(GSAP-16:gamma-Secretase-activating protein C-term)	sp|Q24118|PIGE_DROME(Protein pigeon OS=Drosophila melanogaster OX=7227 GN=pigeon PE=2 SV=2)	114123831
gene-LOC114119192	yes|up	1	gene-LOC114119192	LOC114119192	uncharacterized LOC114119192	1149	179	301	148	311	557	570	10.61	17.62	8.34	19.22	35.01	33.52	12.19	29.25	3.01815	1.59367	8.92e-05	0.00179118	yes	up	XP_027836485.1(uncharacterized protein LOC114119192 [Aphis gossypii])	GO:0016021(cellular_component:integral component of membrane)	0	0	0	0	0	0	0	114119192
gene-LOC114123721	yes|up	1	gene-LOC114123721	LOC114123721	uncharacterized LOC114123721, transcript variant X1	1525	113	68	25	234	234	94	4.9	2.97	1.05	10.36	10.47	3.98	2.97333	8.27	3.62534	1.85812	0.000874541	0.0110276	yes	up	KAE9537524.1(hypothetical protein AGLY_006547 [Aphis glycines])	0	0	0	0	0	0	0	0	114123721
gene-LOC114128880	yes|up	1	gene-LOC114128880	LOC114128880	uncharacterized protein DDB_G0272718-like	701	1170	1685	677	3503	4036	3460	144.83	204.65	79.18	449.75	525.82	420.66	142.887	465.41	4.07976	2.02848	4.03e-09	2.71e-07	yes	up	XP_027849286.1(uncharacterized protein DDB_G0272718-like [Aphis gossypii])	0	0	0	0	0	0	0	0	114128880
gene-LOC114129272	yes|down	1	gene-LOC114129272	LOC114129272	trehalase-like	1786	240	328	313	137	82	65	8.17	11.06	10.16	4.87	2.97	2.2	9.79667	3.34667	0.409806	-1.28699	8.98e-05	0.00179976	yes	down	XP_027849755.1(trehalase-like [Aphis gossypii])	GO:0004555(molecular_function:alpha,alpha-trehalase activity); GO:0005991(biological_process:trehalose metabolic process)	K01194	TREH, treA, treF	map00500(Starch and sucrose metabolism)	COG1626(G:Carbohydrate transport and metabolism)	COG1626(trehalase)	PF01204.19(Trehalase:Trehalase)	sp|Q8MMG9|TREA_PIMHY(Trehalase OS=Pimpla hypochondriaca OX=135724 GN=tre1 PE=1 SV=1)	114129272
gene-LOC114133079	yes|down	1	gene-LOC114133079	LOC114133079	uncharacterized LOC114133079	3643	4307	6578	4895	2380	1439	802	65.41	99.17	71.01	37.83	23.3	12.17	78.53	24.4333	0.371063	-1.43026	0.000213878	0.00367653	yes	down	XP_027854504.1(LOW QUALITY PROTEIN: uncharacterized protein LOC114133079 [Aphis gossypii])	GO:0050660(molecular_function:flavin adenine dinucleotide binding); GO:0016614(molecular_function:oxidoreductase activity, acting on CH-OH group of donors)	K00108	betA, CHDH	map00260(Glycine, serine and threonine metabolism)	COG2303(E:Amino acid transport and metabolism)	COG2303(oxidoreductase)	PF00732.20(GMC_oxred_N:GMC oxidoreductase); PF05199.14(GMC_oxred_C:GMC oxidoreductase); PF05834.13(Lycopene_cycl:Lycopene cyclase protein)	sp|P18172|DHGL_DROPS(Glucose dehydrogenase [FAD, quinone] OS=Drosophila pseudoobscura pseudoobscura OX=46245 GN=Gld PE=3 SV=4)	114133079
gene-LOC114119209	yes|down	1	gene-LOC114119209	LOC114119209	uncharacterized LOC114119209	2317	577.05	775.89	789.52	267.27	213.07	331.59	16.91	24.26	22.72	8.11	6.42	10.01	21.2967	8.18	0.487932	-1.03525	0.000173186	0.00308781	yes	down	XP_027836502.1(uncharacterized protein LOC114119209 [Aphis gossypii])	GO:0005576(cellular_component:extracellular region); GO:0006629(biological_process:lipid metabolic process); GO:0052689(molecular_function:carboxylic ester hydrolase activity)	0	0	0	ENOG4111JY5(S:Function unknown); ENOG4111GFN(S:Function unknown); ENOG410YGS3(S:Function unknown); ENOG410Y91Z(S:Function unknown)	ENOG4111JY5(Lipase); ENOG4111GFN(Lipase); ENOG410YGS3(Lipase); ENOG410Y91Z(Lipase)	PF00151.20(Lipase:Lipase); PF12697.8(Abhydrolase_6:Alpha/beta hydrolase family); PF00561.21(Abhydrolase_1:alpha/beta hydrolase fold)	sp|P11151|LIPL_BOVIN(Lipoprotein lipase OS=Bos taurus OX=9913 GN=LPL PE=1 SV=2)	114119209
gene-LOC114131225	yes|up	1	gene-LOC114131225	LOC114131225	uncharacterized LOC114131225, transcript variant X1	1928	68	63	66	289	204	210	2.92	2.82	2.47	13.7	9.83	9.09	2.73667	10.8733	4.60561	2.20339	3.32e-23	1.36e-20	yes	up	KAF0713234.1(Uncharacterized protein FWK35_00023074 [Aphis craccivora])	0	K23209	THAP9	0	ENOG410YUQ7(S:Function unknown); ENOG4111JB0(S:Function unknown); ENOG4111JGQ(S:Function unknown); ENOG410YNKC(S:Function unknown)	ENOG410YUQ7(-); ENOG4111JB0(-); ENOG4111JGQ(-); ENOG410YNKC(-)	0	0	114131225
gene-LOC114133071	yes|up	1	gene-LOC114133071	LOC114133071	uncharacterized LOC114133071	1034	0	0	0	54.63	85.95	45.87	0	0	0	3.89	6.23	3.11	0	4.41	445.641	8.79974	6.36e-12	6.77e-10	yes	up	XP_027854495.1(uncharacterized protein LOC114133071 [Aphis gossypii])	GO:0016021(cellular_component:integral component of membrane)	0	0	0	0	0	0	0	114133071
gene-LOC114132874	yes|up	1	gene-LOC114132874	LOC114132874	translocator protein	773	409	574	549	904	850	755	43.09	59.45	54.75	98.93	94.46	78.35	52.43	90.58	2.11039	1.07751	4.15e-06	0.000135625	yes	up	XP_027854273.1(translocator protein [Aphis gossypii])	GO:0016021(cellular_component:integral component of membrane)	K05770	TSPO, BZRP	map05166(Human T-cell leukemia virus 1 infection); map04080(Neuroactive ligand-receptor interaction); map04979(Cholesterol metabolism); map04214(Apoptosis - fly)	COG3476(T:Signal transduction mechanisms)	COG3476(tspo and mbr like protein)	PF03073.16(TspO_MBR:TspO/MBR family)	sp|P30536|TSPO_HUMAN(Translocator protein OS=Homo sapiens OX=9606 GN=TSPO PE=1 SV=3)	114132874
gene-LOC114131194	yes|down	1	gene-LOC114131194	LOC114131194	prolyl 4-hydroxylase subunit alpha-2-like	1719	240	308	233	113	59	65	8.21	10.08	7.07	3.9	1.83	2.17	8.45333	2.63333	0.387514	-1.36768	5.63e-06	0.000177454	yes	down	XP_027852158.1(prolyl 4-hydroxylase subunit alpha-2-like [Aphis gossypii])	0	K00472	P4HA	map00330(Arginine and proline metabolism)	ENOG410XS5J(U:Intracellular trafficking, secretion, and vesicular transport)	ENOG410XS5J(ATPase, H transporting, lysosomal accessory protein)	PF08336.12(P4Ha_N:Prolyl 4-Hydroxylase alpha-subunit, N-terminal region); PF13640.7(2OG-FeII_Oxy_3:2OG-Fe(II) oxygenase superfamily)	sp|Q20065|P4HA2_CAEEL(Prolyl 4-hydroxylase subunit alpha-2 OS=Caenorhabditis elegans OX=6239 GN=phy-2 PE=1 SV=1)	114131194
gene-LOC114122150	yes|down	1	gene-LOC114122150	LOC114122150	uncharacterized LOC114122150	771	93.66	113.33	138.62	24.11	14.08	5.02	4.34	5.04	7.02	0.89	0.41	0.17	5.46667	0.49	0.157475	-2.6668	2.38e-07	1.1e-05	yes	down	0	0	0	0	0	0	0	0	0	114122150
gene-LOC114119100	yes|down	1	gene-LOC114119100	LOC114119100	uncharacterized LOC114119100	771	7206	13260	13007	3643	2739	2123	762.33	1379.04	1302.4	400.32	305.62	221.22	1147.92	309.053	0.322667	-1.63188	1.11e-06	4.38e-05	yes	down	XP_027836370.1(uncharacterized protein LOC114119100 [Aphis gossypii])	0	0	0	0	0	0	0	0	114119100
gene-LOC114131193	yes|down	1	gene-LOC114131193	LOC114131193	prolyl 4-hydroxylase subunit alpha-1-like	1891	80	104	112	44	29	20	2.54	3.28	3.4	1.46	0.98	0.63	3.07333	1.02333	0.400744	-1.31925	0.000653518	0.00882095	yes	down	XP_027852157.1(prolyl 4-hydroxylase subunit alpha-1-like [Aphis gossypii])	GO:0031418(molecular_function:L-ascorbic acid binding); GO:0005506(molecular_function:iron ion binding); GO:0016702(molecular_function:oxidoreductase activity, acting on single donors with incorporation of molecular oxygen, incorporation of two atoms of oxygen); GO:0005783(cellular_component:endoplasmic reticulum); GO:0004656(molecular_function:procollagen-proline 4-dioxygenase activity)	K00472	P4HA	map00330(Arginine and proline metabolism)	ENOG410XS5J(S:Function unknown)	ENOG410XS5J(prolyl 4-hydroxylase)	PF08336.12(P4Ha_N:Prolyl 4-Hydroxylase alpha-subunit, N-terminal region); PF13640.7(2OG-FeII_Oxy_3:2OG-Fe(II) oxygenase superfamily)	sp|P54001|P4HA1_RAT(Prolyl 4-hydroxylase subunit alpha-1 OS=Rattus norvegicus OX=10116 GN=P4ha1 PE=2 SV=2)	114131193
gene-LOC114119665	yes|down	1	gene-LOC114119665	LOC114119665	achaete-scute complex protein T3-like, transcript variant X2	1458	368	507	414	141	105	144	18.33	24.99	19.58	7.37	5.52	7.13	20.9667	6.67333	0.389696	-1.35958	5.58e-08	3.01e-06	yes	down	KAE9523252.1(hypothetical protein AGLY_016352 [Aphis glycines])	GO:0003700(molecular_function:transcription factor activity, sequence-specific DNA binding); GO:0046983(molecular_function:protein dimerization activity)	K18484;K09076	MYF5;MESP	map04550(Signaling pathways regulating pluripotency of stem cells)	ENOG4111U26(S:Function unknown); ENOG4112AS0(S:Function unknown)	ENOG4111U26(ATP synthase, H transporting, mitochondrial Fo complex, subunit F2); ENOG4112AS0(Helix-loop-helix DNA-binding domain)	PF00010.27(HLH:Helix-loop-helix DNA-binding domain)	0	114119665
gene-LOC114121610	yes|down	1	gene-LOC114121610	LOC114121610	probable palmitoyltransferase ZDHHC11	3091	446	394	399	121	108	211	8.11	7.11	6.93	2.3	2.09	3.83	7.38333	2.74	0.464044	-1.10767	0.00040332	0.00608686	yes	down	XP_027839820.1(probable palmitoyltransferase ZDHHC11 [Aphis gossypii])	GO:0017150(molecular_function:tRNA dihydrouridine synthase activity); GO:0019706(molecular_function:protein-cysteine S-palmitoyltransferase activity); GO:0016021(cellular_component:integral component of membrane); GO:0050660(molecular_function:flavin adenine dinucleotide binding); GO:0016409(molecular_function:palmitoyltransferase activity)	K20027	ZDHHC1_11	0	COG5273(S:Function unknown)	COG5273(GTPase activating protein and VPS9 domains 1)	PF01529.21(DHHC:DHHC palmitoyltransferase)	sp|Q9H8X9|ZDH11_HUMAN(Probable palmitoyltransferase ZDHHC11 OS=Homo sapiens OX=9606 GN=ZDHHC11 PE=1 SV=1)	114121610
gene-LOC114120234	yes|up	1	gene-LOC114120234	LOC114120234	Y+L amino acid transporter 2-like	1694	50.45	94.5	41.59	124.22	243.36	119.67	1.18	2.39	0.81	3.11	7.83	2.99	1.46	4.64333	3.43212	1.7791	0.000245771	0.0041132	yes	up	KAE9529505.1(hypothetical protein AGLY_011601 [Aphis glycines])	GO:0022857(molecular_function:transmembrane transporter activity); GO:0016021(cellular_component:integral component of membrane)	K13780	SLC7A5, LAT1	map05230(Central carbon metabolism in cancer); map04150(mTOR signaling pathway)	COG0531(E:Amino acid transport and metabolism)	COG0531(amino acid)	PF13520.7(AA_permease_2:Amino acid permease); PF00324.22(AA_permease:Amino acid permease)	sp|Q9QXW9|LAT2_MOUSE(Large neutral amino acids transporter small subunit 2 OS=Mus musculus OX=10090 GN=Slc7a8 PE=1 SV=1)	114120234
gene-LOC114132928	yes|down	1	gene-LOC114132928	LOC114132928	probable cytochrome P450 6a13, transcript variant X1	1954	4954	5992	7542	2545	1642	1723	151.91	181.94	220.69	82.02	53.53	52.67	184.847	62.74	0.406867	-1.29737	8.45e-07	3.43e-05	yes	down	XP_027854335.1(probable cytochrome P450 6a13 isoform X1 [Aphis gossypii])	GO:0005506(molecular_function:iron ion binding); GO:0016705(molecular_function:oxidoreductase activity, acting on paired donors, with incorporation or reduction of molecular oxygen); GO:0004497(molecular_function:monooxygenase activity); GO:0020037(molecular_function:heme binding)	K14999	CYP6	0	COG2124(Q:Secondary metabolites biosynthesis, transport and catabolism)	COG2124(Cytochrome p450)	PF00067.23(p450:Cytochrome P450)	sp|Q9V4U9|C6A13_DROME(Probable cytochrome P450 6a13 OS=Drosophila melanogaster OX=7227 GN=Cyp6a13 PE=2 SV=1)	114132928
gene-LOC114127850	yes|down	1	gene-LOC114127850	LOC114127850	uncharacterized LOC114127850	2448	14	22	12	2	3	0	0.33	0.51	0.27	0.05	0.08	0	0.37	0.0433333	0.135241	-2.8864	0.00344732	0.031894	yes	down	XP_027847986.1(uncharacterized protein LOC114127850, partial [Aphis gossypii])	0	0	0	0	0	0	0	0	114127850
gene-LOC114121347	yes|up	1	gene-LOC114121347	LOC114121347	MTSS1-like protein	658	46.31	64.02	34	100.79	71.26	102.1	6.4	8.67	4.43	14.43	10.35	13.83	6.5	12.87	2.46194	1.29979	0.000159987	0.00291578	yes	up	XP_027839439.1(MTSS1-like protein [Aphis gossypii])	GO:0003779(molecular_function:actin binding); GO:0007009(biological_process:plasma membrane organization); GO:0030036(biological_process:actin cytoskeleton organization)	K20128	MTSS1	0	ENOG410XRT4(S:Function unknown)	ENOG410XRT4(Metastasis suppressor)	PF08397.12(IMD:IRSp53/MIM homology domain)	sp|Q765P7|MTSS2_HUMAN(Protein MTSS 2 OS=Homo sapiens OX=9606 GN=MTSS2 PE=1 SV=1)	114121347
gene-LOC114121995	yes|down	1	gene-LOC114121995	LOC114121995	0	2433	40	57	86	2	16	4	0.95	1.34	1.95	0.05	0.4	0.09	1.41333	0.18	0.159227	-2.65084	0.000763085	0.00991579	yes	down	KAE9544774.1(hypothetical protein AGLY_000316 [Aphis glycines])	0	K10443	KLHL2_3	0	ENOG410XNX8(S:Function unknown); COG2801(L:Replication, recombination and repair)	ENOG410XNX8(kelch-like); COG2801(Retrotransposon protein)	0	sp|Q70JS2|KELC_ANOST(Ring canal kelch homolog OS=Anopheles stephensi OX=30069 GN=kel PE=2 SV=2)	114121995
gene-LOC114119922	yes|up	1	gene-LOC114119922	LOC114119922	replication factor C subunit 5	1624	305.38	341.33	368.75	503.97	538.07	540.67	10.46	10.77	11.22	12.76	11.48	11.31	10.8167	11.85	2.02512	1.01801	9.8e-07	3.91e-05	yes	up	XP_027837461.1(replication factor C subunit 5 [Aphis gossypii])	GO:0016787(molecular_function:hydrolase activity); GO:0006260(biological_process:DNA replication); GO:0005524(molecular_function:ATP binding); GO:0003677(molecular_function:DNA binding)	K10756	RFC3_5	map03430(Mismatch repair); map03420(Nucleotide excision repair); map03030(DNA replication)	COG0470(S:Function unknown)	COG0470(-)	PF08542.12(Rep_fac_C:Replication factor C C-terminal domain); PF00004.30(AAA:ATPase family associated with various cellular activities (AAA)); PF13177.7(DNA_pol3_delta2:DNA polymerase III, delta subunit); PF03215.16(Rad17:Rad17 P-loop domain); PF16193.6(AAA_assoc_2:AAA C-terminal domain); PF13173.7(AAA_14:AAA domain); PF05496.13(RuvB_N:Holliday junction DNA helicase RuvB P-loop domain); PF13086.7…	sp|P40937|RFC5_HUMAN(Replication factor C subunit 5 OS=Homo sapiens OX=9606 GN=RFC5 PE=1 SV=1)	114119922
gene-LOC114127865	yes|down	1	gene-LOC114127865	LOC114127865	uncharacterized LOC114127865	557	5950	7326	6471	1345	892	795	1130.61	1357.21	1154.76	263.63	177.26	146.95	1214.19	195.947	0.196417	-2.34801	2.84e-24	1.26e-21	yes	down	XP_027836138.1(uncharacterized protein LOC114118907 [Aphis gossypii])	0	0	0	0	0	0	0	0	114127865
gene-LOC114119920	yes|up	1	gene-LOC114119920	LOC114119920	uncharacterized LOC114119920	1868	5	2	5	26	20	23	0.16	0.06	0.15	0.88	0.69	0.74	0.123333	0.77	7.4648	2.9001	5.45e-06	0.000172149	yes	up	XP_027837459.1(uncharacterized protein LOC114119920, partial [Aphis gossypii])	0	0	0	0	ENOG410ZB2J(S:Function unknown); ENOG4112BST(S:Function unknown)	ENOG410ZB2J(-); ENOG4112BST(-)	PF10551.10(MULE:MULE transposase domain)	0	114119920
gene-LOC114124039	yes|down	1	gene-LOC114124039	LOC114124039	zinc finger protein 883-like	3038	64	42	42	17	11	16	1.19	0.77	0.74	0.33	0.22	0.3	0.9	0.283333	0.387641	-1.36721	0.00100304	0.0122843	yes	down	XP_027843004.1(zinc finger protein 883-like [Aphis gossypii])	GO:0003676(molecular_function:nucleic acid binding)	K09228	KRAB	map05168(Herpes simplex virus 1 infection)	COG5048(O:Posttranslational modification, protein turnover, chaperones)	COG5048(Protease HtpX homolog)	PF13465.7(zf-H2C2_2:Zinc-finger double domain); PF00096.27(zf-C2H2:Zinc finger, C2H2 type); PF13894.7(zf-C2H2_4:C2H2-type zinc finger); PF05605.13(zf-Di19:Drought induced 19 protein (Di19), zinc-binding); PF13912.7(zf-C2H2_6:C2H2-type zinc finger)	0	114124039
gene-LOC114120623	yes|up	1	gene-LOC114120623	LOC114120623	LIM and SH3 domain protein Lasp-like	1240	0	0	2.23	31.5	29.23	11.96	0	0	0.11	1.76	1.66	0.64	0.0366667	1.35333	46.7687	5.54747	7.51e-06	0.000230262	yes	up	XP_027838390.1(LIM and SH3 domain protein Lasp-like, partial [Aphis gossypii])	GO:0046872(molecular_function:metal ion binding)	K24420	LASP1	0	ENOG4111GQ8(S:Function unknown)	ENOG4111GQ8(LIM and SH3 protein 1)	PF00018.29(SH3_1:SH3 domain); PF00880.19(Nebulin:Nebulin repeat); PF14604.7(SH3_9:Variant SH3 domain); PF07653.18(SH3_2:Variant SH3 domain)	sp|P34416|LASP1_CAEEL(LIM and SH3 domain protein F42H10.3 OS=Caenorhabditis elegans OX=6239 GN=F42H10.3 PE=4 SV=3)	114120623
gene-LOC114125212	yes|up	1	gene-LOC114125212	LOC114125212	facilitated trehalose transporter Tret1-like	1806	6.69	18.29	12.59	57.84	67.76	54.62	0.23	1.32	1.4	3.61	4.38	4.1	0.983333	4.03	6.16418	2.62391	1.95e-08	1.14e-06	yes	up	XP_027844558.1(facilitated trehalose transporter Tret1-like [Aphis gossypii])	GO:0022857(molecular_function:transmembrane transporter activity); GO:0016021(cellular_component:integral component of membrane)	K08144	SLC2A6, GLUT6	0	ENOG410XNQK(G:Carbohydrate transport and metabolism)	ENOG410XNQK(Transporter)	PF00083.25(Sugar_tr:Sugar (and other) transporter); PF07690.17(MFS_1:Major Facilitator Superfamily); PF06609.14(TRI12:Fungal trichothecene efflux pump (TRI12)); PF14325.7(DUF4383:Domain of unknown function (DUF4383))	sp|A5LGM7|TRET1_POLVA(Facilitated trehalose transporter Tret1 OS=Polypedilum vanderplanki OX=319348 GN=Tret1 PE=1 SV=1)	114125212
gene-LOC114125213	yes|up	1	gene-LOC114125213	LOC114125213	biorientation of chromosomes in cell division protein 1-like	577	14	21	11	34	28	25	2.48	3.63	1.83	6.22	5.19	4.31	2.64667	5.24	2.44721	1.29114	0.00545531	0.0447795	yes	up	XP_027844559.1(biorientation of chromosomes in cell division protein 1-like [Aphis gossypii])	0	0	0	0	ENOG4111M2Q(D:Cell cycle control, cell division, chromosome partitioning)	ENOG4111M2Q(biorientation of chromosomes in cell division)	PF05205.13(COMPASS-Shg1:COMPASS (Complex proteins associated with Set1p) component shg1)	sp|Q8NFC6|BD1L1_HUMAN(Biorientation of chromosomes in cell division protein 1-like 1 OS=Homo sapiens OX=9606 GN=BOD1L1 PE=1 SV=2)	114125213
gene-LOC114119929	yes|down	1	gene-LOC114119929	LOC114119929	threonylcarbamoyladenosine tRNA methylthiotransferase, transcript variant X1	2272	271	229	212.16	124	69	75	7.36	6.18	5.75	3.53	2.09	2.19	6.43	2.60333	0.485005	-1.04393	4.33e-05	0.000991975	yes	down	XP_027837471.1(threonylcarbamoyladenosine tRNA methylthiotransferase [Aphis gossypii])	GO:0035598(molecular_function:N6-threonylcarbomyladenosine methylthiotransferase activity); GO:0016021(cellular_component:integral component of membrane); GO:0051539(molecular_function:4 iron, 4 sulfur cluster binding)	K15865	CDKAL1	0	COG0621(O:Posttranslational modification, protein turnover, chaperones)	COG0621(Required for the formation of a threonylcarbamoyl group on adenosine at position 37 (t(6)A37) in tRNAs that read codons beginning with adenine (By similarity))	PF00919.21(UPF0004:Uncharacterized protein family UPF0004); PF04055.22(Radical_SAM:Radical SAM superfamily); PF01938.21(TRAM:TRAM domain)	sp|Q291H5|CDKAL_DROPS(Threonylcarbamoyladenosine tRNA methylthiotransferase OS=Drosophila pseudoobscura pseudoobscura OX=46245 GN=GA19679 PE=3 SV=1)	114119929
gene-LOC114121228	yes|down	1	gene-LOC114121228	LOC114121228	connectin-like	1650	339	401	537	136	92	163	13.6	15.91	20.55	5.71	3.94	6.52	16.6867	5.39	0.392387	-1.34965	3.42e-05	0.000817043	yes	down	XP_027839269.1(connectin-like [Aphis gossypii])	0	0	0	0	COG4886(T:Signal transduction mechanisms)	COG4886(Serine Threonine protein kinase)	PF13855.7(LRR_8:Leucine rich repeat); PF12799.8(LRR_4:Leucine Rich repeats (2 copies)); PF13306.7(LRR_5:BspA type Leucine rich repeat region (6 copies)); PF14580.7(LRR_9:Leucine-rich repeat)	sp|Q01819|CONN_DROME(Connectin OS=Drosophila melanogaster OX=7227 GN=Con PE=2 SV=2)	114121228
gene-LOC114125713	yes|up	1	gene-LOC114125713	LOC114125713	uncharacterized LOC114125713	1295	1	2	10	59	69	47	0.05	0.1	0.48	3.12	3.71	2.37	0.21	3.06667	17.229	4.10677	1.36e-08	8.43e-07	yes	up	KAE9545282.1(hypothetical protein AGLY_000825 [Aphis glycines])	GO:0003677(molecular_function:DNA binding)	0	0	0	ENOG4111GAN(U:Intracellular trafficking, secretion, and vesicular transport); ENOG4111JB0(S:Function unknown)	ENOG4111GAN(Family with sequence similarity 18, member); ENOG4111JB0(-)	0	0	114125713
gene-LOC114128976	yes|down	1	gene-LOC114128976	LOC114128976	locomotion-related protein Hikaru genki	2501	261	208	159	116	62	64	6.01	4.75	3.49	2.79	1.52	1.47	4.75	1.92667	0.497634	-1.00684	0.00108584	0.0130553	yes	down	XP_027849393.1(locomotion-related protein Hikaru genki [Aphis gossypii])	0	0	0	0	ENOG410XPJ1(L:Replication, recombination and repair); ENOG410XSAY(S:Function unknown)	ENOG410XPJ1(Retrotransposon protein); ENOG410XSAY(Sushi domain (SCR repeat))	PF00084.21(Sushi:Sushi repeat (SCR repeat)); PF13927.7(Ig_3:Immunoglobulin domain)	sp|Q09101|HIG_DROME(Locomotion-related protein Hikaru genki OS=Drosophila melanogaster OX=7227 GN=hig PE=1 SV=2)	114128976
gene-LOC114128977	yes|down	1	gene-LOC114128977	LOC114128977	protein argonaute-2-like	2940	42	35	42	7	1	11	0.81	0.67	0.77	0.14	0.02	0.21	0.75	0.123333	0.20554	-2.28251	0.000586425	0.0081744	yes	down	XP_027849394.1(protein argonaute-2-like [Aphis gossypii])	GO:0031047(biological_process:gene silencing by RNA); GO:0003676(molecular_function:nucleic acid binding)	K11593	ELF2C, AGO	map04361(Axon regeneration)	ENOG410XP07(U:Intracellular trafficking, secretion, and vesicular transport)	ENOG410XP07(signal peptide peptidase)	PF02171.18(Piwi:Piwi domain); PF16487.6(ArgoMid:Mid domain of argonaute); PF16486.6(ArgoN:N-terminal domain of argonaute); PF08699.11(ArgoL1:Argonaute linker 1 domain); PF02170.23(PAZ:PAZ domain); PF16488.6(ArgoL2:Argonaute linker 2 domain)	sp|Q9UKV8|AGO2_HUMAN(Protein argonaute-2 OS=Homo sapiens OX=9606 GN=AGO2 PE=1 SV=3)	114128977
gene-LOC114119687	yes|up	1	gene-LOC114119687	LOC114119687	DNA-directed RNA polymerases I, II, and III subunit RPABC5	376	118	136	169	307	329	408	61.75	67.61	81.52	163.21	175.45	200.71	70.2933	179.79	3.20104	1.67854	2.07e-09	1.49e-07	yes	up	XP_001942802.1(DNA-directed RNA polymerases I, II, and III subunit RPABC5 [Acyrthosiphon pisum])	GO:0005736(cellular_component:DNA-directed RNA polymerase I complex); GO:0003677(molecular_function:DNA binding); GO:0006366(biological_process:transcription from RNA polymerase II promoter); GO:0006360(biological_process:transcription from RNA polymerase I promoter); GO:0005665(cellular_component:DNA-directed RNA polymerase II, core complex); GO:0006351(biological_process:transcription, DNA-temp…	K03007	RPB10, POLR2L	map03020(RNA polymerase); map05016(Huntington disease); map04623(Cytosolic DNA-sensing pathway)	COG1644(K:Transcription)	COG1644(DNA-dependent RNA polymerase catalyzes the transcription of DNA into RNA using the four ribonucleoside triphosphates as substrates)	PF01194.18(RNA_pol_N:RNA polymerases N / 8 kDa subunit)	sp|Q9VC49|RPAB5_DROME(DNA-directed RNA polymerases I, II, and III subunit RPABC5 OS=Drosophila melanogaster OX=7227 GN=Rpb10 PE=3 SV=1)	114119687
gene-LOC114128979	yes|up	1	gene-LOC114128979	LOC114128979	thiamine transporter 2-like, transcript variant X2	1461	147	90	99	136	269	168	5.61	3.41	3.64	5.44	11.15	6.53	4.22	7.70667	2.27897	1.18838	0.00179737	0.0192635	yes	up	XP_027849395.1(thiamine transporter 2-like [Aphis gossypii])	GO:0090482(molecular_function:vitamin transmembrane transporter activity); GO:0016021(cellular_component:integral component of membrane)	K14610	SLC19A2_3, THTR	map04977(Vitamin digestion and absorption)	ENOG410XPX0(S:Function unknown); ENOG410XT34(P:Inorganic ion transport and metabolism)	ENOG410XPX0(Kin of IRRE like); ENOG410XT34(reduced folate carrier activity)	PF01770.19(Folate_carrier:Reduced folate carrier)	sp|Q9BZV2|S19A3_HUMAN(Thiamine transporter 2 OS=Homo sapiens OX=9606 GN=SLC19A3 PE=1 SV=1)	114128979
gene-LOC114129015	yes|down	1	gene-LOC114129015	LOC114129015	high affinity cationic amino acid transporter 1-like	1911	997.17	356.01	805.81	319.66	145.62	154.64	64.18	21.84	51.22	13.27	4.97	4.92	45.7467	7.72	0.369501	-1.43635	0.000855735	0.010874	yes	down	XP_027849431.1(high affinity cationic amino acid transporter 1-like [Aphis gossypii])	GO:0022857(molecular_function:transmembrane transporter activity); GO:0016021(cellular_component:integral component of membrane)	0	0	0	COG0531(E:Amino acid transport and metabolism)	COG0531(amino acid)	PF13520.7(AA_permease_2:Amino acid permease); PF00324.22(AA_permease:Amino acid permease)	sp|P30823|SL7A1_RAT(High affinity cationic amino acid transporter 1 OS=Rattus norvegicus OX=10116 GN=Slc7a1 PE=2 SV=1)	114129015
gene-LOC114125982	yes|up	1	gene-LOC114125982	LOC114125982	restriction of telomere capping protein 5-like	1819	26.44	21.34	15.15	99.82	49.18	48.09	0.88	0.7	0.48	3.47	1.74	1.6	0.686667	2.27	4.08254	2.02947	2.76e-06	9.63e-05	yes	up	XP_027845828.1(uncharacterized protein LOC114126140 [Aphis gossypii])	0	0	0	0	ENOG410ZNCI(S:Function unknown)	ENOG410ZNCI(TLD)	PF07534.17(TLD:TLD)	0	114125982
gene-LOC114124040	yes|down	1	gene-LOC114124040	LOC114124040	alpha-(1,6)-fucosyltransferase-like	2047	43	52	33	13	8	8	1.25	1.49	0.91	0.39	0.25	0.23	1.21667	0.29	0.292509	-1.77345	0.000228582	0.0038886	yes	down	XP_027843005.1(alpha-(1,6)-fucosyltransferase-like [Aphis gossypii])	GO:0016758(molecular_function:transferase activity, transferring hexosyl groups); GO:0016021(cellular_component:integral component of membrane)	K00717	FUT8	map00510(N-Glycan biosynthesis); map00513(Various types of N-glycan biosynthesis); map05202(Transcriptional misregulation in cancer); map00533(Glycosaminoglycan biosynthesis - keratan sulfate)	ENOG410YHM8(S:Function unknown)	ENOG410YHM8(Catalyzes the addition of fucose in alpha 1-6 linkage to the first GlcNAc residue, next to the peptide chains in N-glycans (By similarity))	0	sp|Q9WTS2|FUT8_MOUSE(Alpha-(1,6)-fucosyltransferase OS=Mus musculus OX=10090 GN=Fut8 PE=1 SV=2)	114124040
gene-LOC114121830	yes|up	1	gene-LOC114121830	LOC114121830	uncharacterized LOC114121830	670	358	423	131	816	1189	820	44.05	50.62	15.42	107.77	158.98	102.4	36.6967	123.05	4.11168	2.03973	2.88e-06	9.99e-05	yes	up	XP_027840110.1(uncharacterized protein LOC114121830 [Aphis gossypii])	0	0	0	0	ENOG410Y7NC(S:Function unknown); ENOG41120FQ(S:Function unknown); ENOG410Z6E3(S:Function unknown); ENOG410Y8DA(S:Function unknown)	ENOG410Y7NC(-); ENOG41120FQ(-); ENOG410Z6E3(-); ENOG410Y8DA(Juvenile hormone-inducible protein)	0	0	114121830
gene-LOC114119447	yes|down	1	gene-LOC114119447	LOC114119447	protein takeout-like	921	95	92.02	66.38	0.69	0	0	7.66	7.32	5.08	0.06	0	0	6.68667	0.02	0.00554689	-7.4941	1.32e-09	9.64e-08	yes	down	XP_027836801.1(protein takeout-like, partial [Aphis gossypii])	0	0	0	0	ENOG4111H46(S:Function unknown)	ENOG4111H46(Haemolymph juvenile hormone binding protein (JHBP))	PF06585.12(JHBP:Haemolymph juvenile hormone binding protein (JHBP))	0	114119447
gene-LOC114121837	yes|up	1	gene-LOC114121837	LOC114121837	uncharacterized LOC114121837	2277	1164	1361	1704	1881	2412	2535	29.83	34.58	41.66	50.4	65.82	64.81	35.3567	60.3433	2.09963	1.07013	0.000122757	0.00233727	yes	up	XP_027840122.1(uncharacterized protein LOC114121837 [Aphis gossypii])	GO:0008234(molecular_function:cysteine-type peptidase activity)	K01363	CTSB	map04142(Lysosome); map04621(NOD-like receptor signaling pathway); map04924(Renin secretion); map04210(Apoptosis); map04612(Antigen processing and presentation); map04140(Autophagy - animal)	COG4870(U:Intracellular trafficking, secretion, and vesicular transport)	COG4870(Calcium channel)	PF00112.24(Peptidase_C1:Papain family cysteine protease)	sp|Q4R5M2|CATB_MACFA(Cathepsin B OS=Macaca fascicularis OX=9541 GN=CTSB PE=2 SV=1)	114121837
gene-LOC114121590	yes|down	1	gene-LOC114121590	LOC114121590	putative glutathione-specific gamma-glutamylcyclotransferase 2	720	131.49	106.48	89.74	9.64	23.86	0	15.56	12.37	10.04	1.18	2.97	0	12.6567	1.38333	0.138951	-2.84735	0.00131774	0.0151996	yes	down	XP_027839798.1(putative glutathione-specific gamma-glutamylcyclotransferase 2 [Aphis gossypii])	GO:0061928(molecular_function:glutathione specific gamma-glutamylcyclotransferase activity); GO:0006751(biological_process:glutathione catabolic process); GO:0016740(molecular_function:transferase activity); GO:0003839(molecular_function:gamma-glutamylcyclotransferase activity)	K15627;K07232	ASPSCR1, ASPL;CHAC, chaC	map00480(Glutathione metabolism); map05202(Transcriptional misregulation in cancer)	COG3703(P:Inorganic ion transport and metabolism)	COG3703(cation transport)	PF04752.13(ChaC:ChaC-like protein); PF06094.13(GGACT:Gamma-glutamyl cyclotransferase, AIG2-like)	sp|Q5ZI66|CHAC2_CHICK(Putative glutathione-specific gamma-glutamylcyclotransferase 2 OS=Gallus gallus OX=9031 GN=chac2 PE=2 SV=1)	114121590
gene-LOC114121838	yes|up	1	gene-LOC114121838	LOC114121838	uncharacterized LOC114121838	2398	2808	3470	4039	6150	5469	5241	76.26	90.62	105.94	176.37	160.87	146.16	90.94	161.133	2.10172	1.07157	1.68e-06	6.19e-05	yes	up	XP_027840123.1(LOW QUALITY PROTEIN: uncharacterized protein LOC114121838 [Aphis gossypii])	GO:0008234(molecular_function:cysteine-type peptidase activity)	K01363	CTSB	map04142(Lysosome); map04621(NOD-like receptor signaling pathway); map04924(Renin secretion); map04210(Apoptosis); map04612(Antigen processing and presentation); map04140(Autophagy - animal)	COG4870(O:Posttranslational modification, protein turnover, chaperones)	COG4870(cathepsin)	PF00112.24(Peptidase_C1:Papain family cysteine protease); PF08127.14(Propeptide_C1:Peptidase family C1 propeptide)	sp|P00787|CATB_RAT(Cathepsin B OS=Rattus norvegicus OX=10116 GN=Ctsb PE=1 SV=2)	114121838
gene-LOC114121839	yes|up	1	gene-LOC114121839	LOC114121839	2-acylglycerol O-acyltransferase 2-like	1092	0	0	0	59.78	70.12	7.04	0	0	0	3.95	4.72	0.44	0	3.03667	322.62	8.33369	3.98e-08	2.2e-06	yes	up	XP_027840124.1(2-acylglycerol O-acyltransferase 2-like [Aphis gossypii])	GO:0016021(cellular_component:integral component of membrane); GO:0016747(molecular_function:transferase activity, transferring acyl groups other than amino-acyl groups)	K14457	MOGAT2, MGAT2	map00561(Glycerolipid metabolism); map04975(Fat digestion and absorption)	ENOG410XTG3(S:Function unknown)	ENOG410XTG3(o-acyltransferase)	PF03982.14(DAGAT:Diacylglycerol acyltransferase)	sp|Q80W94|MOGT2_MOUSE(2-acylglycerol O-acyltransferase 2 OS=Mus musculus OX=10090 GN=Mogat2 PE=1 SV=1)	114121839
gene-LOC114125822	yes|down	1	gene-LOC114125822	LOC114125822	protein PELPK1-like, transcript variant X3	2116	222	169	170	61	56	87	6.48	4.63	4.48	1.83	1.69	2.5	5.19667	2.00667	0.476058	-1.07079	0.000111157	0.00215929	yes	down	XP_027845407.1(protein PELPK1-like [Aphis gossypii])	GO:0016021(cellular_component:integral component of membrane)	0	0	0	0	0	0	0	114125822
gene-LOC114131672	yes|up	1	gene-LOC114131672	LOC114131672	uncharacterized LOC114131672	188	123.83	556.9	1119.61	2560.49	2166.57	2917.34	53.93	232.39	474.56	1163.48	976.23	1223.96	253.627	1121.22	5.32473	2.41271	0.00019873	0.00346797	yes	up	KAF0772052.1(Uncharacterized protein FWK35_00005487 [Aphis craccivora])	0	0	0	0	0	0	0	0	114131672
gene-LOC114131851	yes|up	1	gene-LOC114131851	LOC114131851	uncharacterized LOC114131851, transcript variant X2	755	115.27	130.69	139.48	201.97	210.03	219.96	11.68	12.03	13.72	19.35	21.25	20.31	12.4767	20.3033	2.13104	1.09156	2.06e-06	7.48e-05	yes	up	XP_027852965.1(uncharacterized protein LOC114131851 [Aphis gossypii])	0	0	0	0	ENOG41127ER(O:Posttranslational modification, protein turnover, chaperones)	ENOG41127ER(p53 and DNA-damage regulated 1)	PF01920.21(Prefoldin_2:Prefoldin subunit)	sp|Q642A0|PDRG1_RAT(p53 and DNA damage-regulated protein 1 OS=Rattus norvegicus OX=10116 GN=Pdrg1 PE=2 SV=2)	114131851
gene-LOC114123119	yes|down	1	gene-LOC114123119	LOC114123119	uncharacterized LOC114123119	689	20	34	12	2	1	2	1.18	2.27	0.69	0.26	0.13	0.17	1.38	0.186667	0.0979428	-3.35192	0.000327982	0.00518221	yes	down	0	0	0	0	0	0	0	0	0	114123119
gene-LOC114131852	yes|up	1	gene-LOC114131852	LOC114131852	acylphosphatase-2	716	140	70	60	261	144	119	16.72	8.21	6.77	32.34	18.11	13.97	10.5667	21.4733	2.52435	1.33591	0.00108935	0.0130631	yes	up	XP_022173576.1(acylphosphatase-2 [Myzus persicae])	GO:0003998(molecular_function:acylphosphatase activity)	K01512	acyP	map00620(Pyruvate metabolism)	ENOG41126ER(O:Posttranslational modification, protein turnover, chaperones)	ENOG41126ER(acylphosphatase)	PF00708.19(Acylphosphatase:Acylphosphatase)	sp|P00821|ACYP2_MELGA(Acylphosphatase-2 OS=Meleagris gallopavo OX=9103 GN=ACYP2 PE=1 SV=2)	114131852
gene-LOC114120710	yes|down	1	gene-LOC114120710	LOC114120710	uncharacterized LOC114120710	711	193.93	269.34	230.18	78.66	37.54	28.7	13.9	19.82	16.25	6.98	3.05	2.69	16.6567	4.24	0.266569	-1.90742	1.2e-06	4.64e-05	yes	down	XP_027838513.1(uncharacterized protein LOC114120710 [Aphis gossypii])	GO:0003677(molecular_function:DNA binding)	0	0	0	ENOG4111TCC(S:Function unknown)	ENOG4111TCC(Hemimethylated DNA-binding protein YccV like)	PF08755.12(YccV-like:Hemimethylated DNA-binding protein YccV like)	0	114120710
gene-LOC114123118	yes|down	1	gene-LOC114123118	LOC114123118	uncharacterized LOC114123118	356	51	38	35	0	2	1	8.95	7.1	10.44	0	0.09	0.04	8.83	0.0433333	0.0318369	-4.97316	1.9e-07	9.09e-06	yes	down	KAE9521651.1(hypothetical protein AGLY_017947 [Aphis glycines])	0	0	0	0	0	0	0	0	114123118
gene-LOC114125916	yes|up	1	gene-LOC114125916	LOC114125916	endocuticle structural glycoprotein SgAbd-2-like, transcript variant X1	1069	91877	106295	41638	117560	147460	100430	6001.65	6855.54	2584.53	8002.03	10210.3	6503.78	5147.24	8238.7	2.01092	1.00785	0.00611072	0.0485984	yes	up	XP_027845535.1(larval cuticle protein LCP-22-like isoform X1 [Aphis gossypii])	GO:0042302(molecular_function:structural constituent of cuticle)	0	0	0	ENOG4111PJ1(S:Function unknown)	ENOG4111PJ1(Cuticular protein)	PF00379.24(Chitin_bind_4:Insect cuticle protein)	sp|Q7M4F3|CUD2_SCHGR(Endocuticle structural glycoprotein SgAbd-2 OS=Schistocerca gregaria OX=7010 PE=1 SV=1)	114125916
gene-LOC114130079	yes|up	1	gene-LOC114130079	LOC114130079	WD repeat-containing protein 55 homolog, transcript variant X1	1578	0	0	0	15	10	23	0	0	0	0.62	0.42	0.9	0	0.646667	112.888	6.81875	1.45e-06	5.44e-05	yes	up	XP_027850773.1(WD repeat-containing protein 55 homolog isoform X1 [Aphis gossypii])	0	K24750	WDR55, JIP5	0	ENOG410ZHU5(S:Function unknown); COG2319(S:Function unknown)	ENOG410ZHU5(WD repeatcontaining protein); COG2319(wd repeat)	PF12894.8(ANAPC4_WD40:Anaphase-promoting complex subunit 4 WD40 domain); PF00400.33(WD40:WD domain, G-beta repeat)	sp|B4GMG4|WDR55_DROPE(WD repeat-containing protein 55 homolog OS=Drosophila persimilis OX=7234 GN=GL12389 PE=3 SV=1)	114130079
gene-LOC114129286	yes|down	1	gene-LOC114129286	LOC114129286	uncharacterized LOC114129286	1276	23	12	8	1	0	0	1.19	0.61	0.39	0.05	0	0	0.73	0.0166667	0.0331612	-4.91436	0.000741746	0.0097043	yes	down	XP_027849771.1(uncharacterized protein LOC114129286 [Aphis gossypii])	0	0	0	0	ENOG410Z518(S:Function unknown)	ENOG410Z518(THAP domain containing 9)	PF05485.13(THAP:THAP domain)	0	114129286
gene-LOC114128871	yes|up	1	gene-LOC114128871	LOC114128871	uncharacterized LOC114128871	967	6	2	6	18	10	15	0.45	0.15	0.43	1.41	0.8	1.12	0.343333	1.11	3.96828	1.98851	0.00556573	0.0453444	yes	up	XP_027849273.1(uncharacterized protein LOC114128871 [Aphis gossypii])	0	0	0	0	ENOG4111UKS(S:Function unknown)	ENOG4111UKS(riboflavin aldehyde-forming enzyme)	PF03330.19(DPBB_1:Lytic transglycolase)	sp|P86242|PAPI_STRMB(Papain inhibitor OS=Streptomyces mobaraensis OX=35621 GN=pi PE=1 SV=2)	114128871
gene-ND2	yes|up	1	gene-ND2	ND2	NADH dehydrogenase subunit 2	978	79	56	45	116	96	79	5.84	4.09	3.16	8.94	7.52	5.79	4.36333	7.41667	2.11084	1.07782	0.000302021	0.00485769	yes	up	YP_009048925.1(NADH dehydrogenase subunit 2 [Aphis gossypii])	GO:0008137(molecular_function:NADH dehydrogenase (ubiquinone) activity); GO:0016021(cellular_component:integral component of membrane); GO:0005739(cellular_component:mitochondrion); GO:0006120(biological_process:mitochondrial electron transport, NADH to ubiquinone); GO:0005743(cellular_component:mitochondrial inner membrane); GO:0070469(cellular_component:respiratory chain)	K03879	ND2	map04714(Thermogenesis); map04723(Retrograde endocannabinoid signaling); map05208(Chemical carcinogenesis - reactive oxygen species); map05012(Parkinson disease); map05010(Alzheimer disease); map05016(Huntington disease); map05014(Amyotrophic lateral sclerosis); map05415(Diabetic cardiomyopathy); map00190(Oxidative phosphorylation); map05022(Pathways of neurodegeneration - multiple diseases); map…	COG1009(C:Energy production and conversion); COG1007(C:Energy production and conversion)	COG1009(NDH-1 shuttles electrons from NADH, via FMN and iron- sulfur (Fe-S) centers, to quinones in the respiratory chain. The immediate electron acceptor for the enzyme in this species is believed to be ubiquinone. Couples the redox reaction to proton translocation (for every two electrons transferred, four hydrogen ions are translocated across the cytoplasmic membrane), and thus conserves the r…	0	sp|P34848|NU2M_ANOGA(NADH-ubiquinone oxidoreductase chain 2 OS=Anopheles gambiae OX=7165 GN=mt:ND2 PE=3 SV=2)	19909112
gene-LOC114129750	yes|down	1	gene-LOC114129750	LOC114129750	uncharacterized LOC114129750	2071	249	315	369	84	90	44	7.12	8.93	10.06	2.51	2.74	1.25	8.70333	2.16667	0.300921	-1.73255	1.82e-06	6.66e-05	yes	down	XP_027850379.1(uncharacterized protein LOC114129750 [Aphis gossypii])	0	0	0	0	0	0	0	0	114129750
gene-LOC114129169	yes|down	1	gene-LOC114129169	LOC114129169	uncharacterized LOC114129169	1728	203	58	37	16	13	30	7.19	2.03	1.25	0.59	0.49	1.06	3.49	0.713333	0.268237	-1.89842	0.00573396	0.0463717	yes	down	XP_027849621.1(uncharacterized protein LOC114129169 [Aphis gossypii])	GO:0008168(molecular_function:methyltransferase activity); GO:0032259(biological_process:methylation)	K10718	JHAMT	map00981(Insect hormone biosynthesis)	ENOG410ZWS9(S:Function unknown)	ENOG410ZWS9(Acid methyltransferase)	PF13847.7(Methyltransf_31:Methyltransferase domain); PF13649.7(Methyltransf_25:Methyltransferase domain); PF13489.7(Methyltransf_23:Methyltransferase domain); PF08241.13(Methyltransf_11:Methyltransferase domain); PF08242.13(Methyltransf_12:Methyltransferase domain); PF01209.19(Ubie_methyltran:ubiE/COQ5 methyltransferase family); PF08003.12(Methyltransf_9:Protein of unknown function (DUF1698)); PF…	sp|Q9VJK8|JHAMT_DROME(Juvenile hormone acid O-methyltransferase OS=Drosophila melanogaster OX=7227 GN=jhamt PE=1 SV=2)	114129169
gene-LOC114129690	yes|up	1	gene-LOC114129690	LOC114129690	elongation of very long chain fatty acids protein AAEL008004-like	1143	558	764	469	1063	1762	1504	49.67	63.05	39.68	102.09	163.47	133.49	50.8	133.017	3.18524	1.6714	2.56e-07	1.17e-05	yes	up	XP_027850291.1(elongation of very long chain fatty acids protein AAEL008004-like [Aphis gossypii])	GO:0006633(biological_process:fatty acid biosynthetic process); GO:0016021(cellular_component:integral component of membrane); GO:0102337(molecular_function:3-oxo-cerotoyl-CoA synthase activity); GO:0102336(molecular_function:3-oxo-arachidoyl-CoA synthase activity); GO:0102338(molecular_function:3-oxo-lignoceronyl-CoA synthase activity); GO:0102756(molecular_function:very-long-chain 3-ketoacyl-Co…	K10250	ELOVL7	map01040(Biosynthesis of unsaturated fatty acids); map00062(Fatty acid elongation)	ENOG410XRWT(I:Lipid transport and metabolism); ENOG410XRWT(Q:Secondary metabolites biosynthesis, transport and catabolism)	ENOG410XRWT(Amp-dependent synthetase and ligase); ENOG410XRWT(Amp-dependent synthetase and ligase)	PF01151.19(ELO:GNS1/SUR4 family)	sp|Q1HRV8|ELVL1_AEDAE(Elongation of very long chain fatty acids protein AAEL008004 OS=Aedes aegypti OX=7159 GN=AAEL008004 PE=2 SV=2)	114129690
gene-LOC114132078	yes|down	1	gene-LOC114132078	LOC114132078	peroxidase-like	2218	1056	1700	1190	432	395	356	27.9	44.56	29.99	11.93	11.11	9.38	34.15	10.8067	0.386516	-1.3714	1.61e-07	7.88e-06	yes	down	XP_027853265.1(peroxidase-like [Aphis gossypii])	GO:0042600(cellular_component:chorion); GO:0004601(molecular_function:peroxidase activity); GO:0020037(molecular_function:heme binding); GO:0006979(biological_process:response to oxidative stress)	K19511	PXDN, VPO1	0	ENOG410XPZ3(S:Function unknown)	ENOG410XPZ3(prostaglandin G H synthase and cyclooxygenase)	PF03098.16(An_peroxidase:Animal haem peroxidase)	sp|Q01603|PERO_DROME(Peroxidase OS=Drosophila melanogaster OX=7227 GN=Pxd PE=2 SV=2)	114132078
gene-LOC114130558	yes|down	1	gene-LOC114130558	LOC114130558	uncharacterized LOC114130558	460	2227	4490	5018	1430	957	879	388.62	804.95	879.44	265.14	188.21	148.51	691.003	200.62	0.351317	-1.50915	5.24e-05	0.00115345	yes	down	XP_027851350.1(uncharacterized protein LOC114130558 [Aphis gossypii])	0	0	0	0	0	0	0	0	114130558
gene-LOC114123187	yes|up	1	gene-LOC114123187	LOC114123187	cytochrome P450 6g1-like	1004	288.44	618.73	848.83	2774.37	1662.71	1679.18	20.56	43.52	57.47	206.02	125.54	118.56	40.5167	150.04	4.36737	2.12676	8.03e-07	3.27e-05	yes	up	XP_027841883.1(cytochrome P450 6g1-like [Aphis gossypii])	GO:0005506(molecular_function:iron ion binding); GO:0016705(molecular_function:oxidoreductase activity, acting on paired donors, with incorporation or reduction of molecular oxygen); GO:0016021(cellular_component:integral component of membrane); GO:0004497(molecular_function:monooxygenase activity); GO:0020037(molecular_function:heme binding)	K14999	CYP6	0	COG2124(Q:Secondary metabolites biosynthesis, transport and catabolism)	COG2124(Cytochrome p450)	PF00067.23(p450:Cytochrome P450)	sp|Q9V674|CP6G1_DROME(Cytochrome P450 6g1 OS=Drosophila melanogaster OX=7227 GN=Cyp6g1 PE=2 SV=1)	114123187
gene-LOC114130552	yes|down	1	gene-LOC114130552	LOC114130552	uncharacterized LOC114130552	950	1171	2317	3277	672	378	464	90.3	176.2	239.88	53.96	30.85	35.41	168.793	40.0733	0.280838	-1.83219	1.31e-05	0.000366238	yes	down	KAE9525214.1(hypothetical protein AGLY_014399, partial [Aphis glycines])	0	0	0	0	0	0	0	0	114130552
gene-LOC114126439	yes|up	1	gene-LOC114126439	LOC114126439	protein ANTAGONIST OF LIKE HETEROCHROMATIN PROTEIN 1-like	889	0	0	0	5	3	13	0	0	0	0.44	0.27	1.09	0	0.6	49.6046	5.6324	0.00114921	0.0135966	yes	up	XP_027846183.1(protein ANTAGONIST OF LIKE HETEROCHROMATIN PROTEIN 1-like [Aphis gossypii])	0	0	0	0	ENOG411206Y(S:Function unknown)	ENOG411206Y(transposon protein)	PF13359.7(DDE_Tnp_4:DDE superfamily endonuclease); PF13613.7(HTH_Tnp_4:Helix-turn-helix of DDE superfamily endonuclease)	sp|Q9M2U3|ALPL_ARATH(Protein ALP1-like OS=Arabidopsis thaliana OX=3702 GN=At3g55350 PE=2 SV=1)	114126439
gene-LOC114126438	yes|up	1	gene-LOC114126438	LOC114126438	uncharacterized LOC114126438	1112	0	0	2	15	6	8	0	0	0.12	0.97	0.39	0.49	0.04	0.616667	18.2041	4.18619	0.00237558	0.0237971	yes	up	XP_027846182.1(uncharacterized protein LOC114126438 [Aphis gossypii])	GO:0005634(cellular_component:nucleus); GO:0003677(molecular_function:DNA binding)	0	0	0	ENOG410Y6DQ(S:Function unknown); ENOG410ZPGB(S:Function unknown)	ENOG410Y6DQ(anatomical structure morphogenesis); ENOG410ZPGB(Alcohol dehydrogenase transcription factor Myb/SANT-like)	PF10545.10(MADF_DNA_bdg:Alcohol dehydrogenase transcription factor Myb/SANT-like); PF13873.7(Myb_DNA-bind_5:Myb/SANT-like DNA-binding domain); PF13921.7(Myb_DNA-bind_6:Myb-like DNA-binding domain); PF00249.32(Myb_DNA-binding:Myb-like DNA-binding domain); PF13837.7(Myb_DNA-bind_4:Myb/SANT-like DNA-binding domain)	0	114126438
gene-LOC114123115	yes|up	1	gene-LOC114123115	LOC114123115	membrane-bound alkaline phosphatase-like	1643	529.44	2544.35	1072.28	2653.28	2569.24	4496.93	19.92	94.81	38.45	104.29	102.81	168.5	51.06	125.2	3.00478	1.58726	0.00444163	0.0385791	yes	up	XP_027841778.1(membrane-bound alkaline phosphatase-like [Aphis gossypii])	GO:0016021(cellular_component:integral component of membrane); GO:0004035(molecular_function:alkaline phosphatase activity)	K01077	E3.1.3.1, phoA, phoB	map00730(Thiamine metabolism); map00790(Folate biosynthesis); map01240(Biosynthesis of cofactors)	COG1785(P:Inorganic ion transport and metabolism)	COG1785(alkaline phosphatase)	PF00245.21(Alk_phosphatase:Alkaline phosphatase); PF00884.24(Sulfatase:Sulfatase)	sp|P29523|PPB_BOMMO(Membrane-bound alkaline phosphatase OS=Bombyx mori OX=7091 GN=Alp-m PE=1 SV=4)	114123115
gene-LOC114130415	yes|down	1	gene-LOC114130415	LOC114130415	cathepsin B-like	1183	13404	23992	39362	4103	1772	2521	764.08	1351.56	2134.23	243.93	107.17	142.65	1416.62	164.583	0.136198	-2.87623	2.53e-10	2.11e-08	yes	down	XP_027851195.1(cathepsin B-like [Aphis gossypii])	GO:0004197(molecular_function:cysteine-type endopeptidase activity); GO:0050790(biological_process:regulation of catalytic activity)	K01363	CTSB	map04142(Lysosome); map04621(NOD-like receptor signaling pathway); map04924(Renin secretion); map04210(Apoptosis); map04612(Antigen processing and presentation); map04140(Autophagy - animal)	COG4870(O:Posttranslational modification, protein turnover, chaperones)	COG4870(cathepsin)	PF00112.24(Peptidase_C1:Papain family cysteine protease); PF08127.14(Propeptide_C1:Peptidase family C1 propeptide)	sp|P10605|CATB_MOUSE(Cathepsin B OS=Mus musculus OX=10090 GN=Ctsb PE=1 SV=2)	114130415
gene-LOC114130747	yes|down	1	gene-LOC114130747	LOC114130747	lipase 3-like, transcript variant X2	3063	29.81	23.86	22.69	9	3	5.93	0.67	0.62	0.51	0.25	0.07	0.16	0.6	0.16	0.301367	-1.7304	0.0034201	0.0316931	yes	down	XP_027851595.1(lipase 3-like isoform X1 [Aphis gossypii])	GO:0016787(molecular_function:hydrolase activity); GO:0006629(biological_process:lipid metabolic process)	K01052;K10408	LIPA;DNAH	map04979(Cholesterol metabolism); map04142(Lysosome); map05016(Huntington disease); map05014(Amyotrophic lateral sclerosis); map00100(Steroid biosynthesis); map05022(Pathways of neurodegeneration - multiple diseases)	COG0596(S:Function unknown)	COG0596(Alpha beta hydrolase)	PF04083.17(Abhydro_lipase:Partial alpha/beta-hydrolase lipase region); PF00561.21(Abhydrolase_1:alpha/beta hydrolase fold); PF12146.9(Hydrolase_4:Serine aminopeptidase, S33)	sp|O46107|LIP1_DROME(Lipase 1 OS=Drosophila melanogaster OX=7227 GN=Lip1 PE=2 SV=2)	114130747
gene-LOC114125146	yes|down	1	gene-LOC114125146	LOC114125146	cytochrome P450 4C1-like, transcript variant X1	2104	240	164	220.08	90	44	62.12	6.58	4.46	5.76	2.58	1.28	1.7	5.6	1.85333	0.403893	-1.30796	1.6e-05	0.000434955	yes	down	XP_027844467.1(cytochrome P450 4C1-like isoform X1 [Aphis gossypii])	0	K15001	CYP4	0	COG2124(Q:Secondary metabolites biosynthesis, transport and catabolism)	COG2124(Cytochrome p450)	PF00067.23(p450:Cytochrome P450)	sp|P29981|CP4C1_BLADI(Cytochrome P450 4C1 OS=Blaberus discoidalis OX=6981 GN=CYP4C1 PE=2 SV=1)	114125146
gene-LOC114125147	yes|up	1	gene-LOC114125147	LOC114125147	ras-related protein Rab-43-like	1426	0	4.92	7.21	381.48	392.51	415.12	0	0.19	0.26	17.76	18.63	18.5	0.15	18.2967	128.47	7.00528	1.06e-45	1.74e-42	yes	up	XP_027844470.1(ras-related protein Rab-43-like [Aphis gossypii])	GO:0003924(molecular_function:GTPase activity); GO:0005525(molecular_function:GTP binding)	K07930	RAB43	0	ENOG410XQN5(S:Function unknown)	ENOG410XQN5(member RAS oncogene family)	PF00071.23(Ras:Ras family); PF08477.14(Roc:Ras of Complex, Roc, domain of DAPkinase); PF00025.22(Arf:ADP-ribosylation factor family); PF00009.28(GTP_EFTU:Elongation factor Tu GTP binding domain); PF04670.13(Gtr1_RagA:Gtr1/RagA G protein conserved region); PF09439.11(SRPRB:Signal recognition particle receptor beta subunit); PF01926.24(MMR_HSR1:50S ribosome-binding GTPase)	sp|Q86YS6|RAB43_HUMAN(Ras-related protein Rab-43 OS=Homo sapiens OX=9606 GN=RAB43 PE=1 SV=1)	114125147
gene-LOC114123509	yes|up	1	gene-LOC114123509	LOC114123509	tryptophan 2,3-dioxygenase	1759	101	56	50	169	91	79	3.5	1.92	1.65	6.12	3.36	2.73	2.35667	4.07	2.12234	1.08565	0.00581935	0.0468318	yes	up	XP_027842319.1(tryptophan 2,3-dioxygenase [Aphis gossypii])	GO:0004833(molecular_function:tryptophan 2,3-dioxygenase activity); GO:0019441(biological_process:tryptophan catabolic process to kynurenine); GO:0046872(molecular_function:metal ion binding); GO:0006727(biological_process:ommochrome biosynthetic process); GO:0020037(molecular_function:heme binding)	K00453	TDO2, kynA	map00380(Tryptophan metabolism); map01240(Biosynthesis of cofactors)	COG3483(E:Amino acid transport and metabolism)	COG3483(Catalyzes the oxidative cleavage of the L-tryptophan (L- Trp) pyrrole ring (By similarity))	PF03301.14(Trp_dioxygenase:Tryptophan 2,3-dioxygenase)	sp|Q95NN1|T23O_TRICA(Tryptophan 2,3-dioxygenase OS=Tribolium castaneum OX=7070 PE=2 SV=1)	114123509
gene-LOC114126181	yes|down	1	gene-LOC114126181	LOC114126181	putative hydroxypyruvate isomerase	1193	274.65	301.85	288.02	35.78	44.45	93.87	15.48	16.82	15.44	2.1	2.66	5.25	15.9133	3.33667	0.263428	-1.92452	3.16e-06	0.000108133	yes	down	XP_027845873.1(putative hydroxypyruvate isomerase [Aphis gossypii])	GO:0008903(molecular_function:hydroxypyruvate isomerase activity)	K01816	hyi, gip	map00630(Glyoxylate and dicarboxylate metabolism)	COG3622(G:Carbohydrate transport and metabolism)	COG3622(Catalyzes the reversible isomerization between hydroxypyruvate and 2-hydroxy-3-oxopropanoate (also termed tartronate semialdehyde) (By similarity))	PF01261.25(AP_endonuc_2:Xylose isomerase-like TIM barrel)	sp|Q7T3H9|HYI_DANRE(Putative hydroxypyruvate isomerase OS=Danio rerio OX=7955 GN=hyi PE=2 SV=2)	114126181
gene-LOC114123311	yes|down	1	gene-LOC114123311	LOC114123311	glutathione peroxidase-like	866	1872	2434	3201	752	535	505	165.4	211.81	268.17	69.12	49.96	44.07	215.127	54.3833	0.303842	-1.71861	3.4e-09	2.37e-07	yes	down	XP_027842036.1(uncharacterized protein LOC114123311 [Aphis gossypii])	GO:0046983(molecular_function:protein dimerization activity); GO:0006979(biological_process:response to oxidative stress); GO:0004602(molecular_function:glutathione peroxidase activity)	K00432;K05361	gpx, btuE, bsaA;GPX4	map00480(Glutathione metabolism); map00590(Arachidonic acid metabolism); map04216(Ferroptosis); map04918(Thyroid hormone synthesis); map05016(Huntington disease); map05014(Amyotrophic lateral sclerosis); map05022(Pathways of neurodegeneration - multiple diseases)	COG0386(O:Posttranslational modification, protein turnover, chaperones)	COG0386(glutathione peroxidase)	PF00255.20(GSHPx:Glutathione peroxidase); PF00578.22(AhpC-TSA:AhpC/TSA family); PF08534.11(Redoxin:Redoxin)	sp|P52032|GPX1_ARATH(Phospholipid hydroperoxide glutathione peroxidase 1, chloroplastic OS=Arabidopsis thaliana OX=3702 GN=GPX1 PE=2 SV=2)	114123311
gene-LOC114124248	yes|down	1	gene-LOC114124248	LOC114124248	0	2037	73	70	81	11	10	20	2.11	2.02	2.25	0.34	0.31	0.58	2.12667	0.41	0.237802	-2.07217	9.41e-07	3.8e-05	yes	down	KAE9545636.1(hypothetical protein AGLY_001179 [Aphis glycines])	0	K10443	KLHL2_3	0	ENOG410XNX8(S:Function unknown); COG2801(L:Replication, recombination and repair)	ENOG410XNX8(kelch-like); COG2801(Retrotransposon protein)	0	sp|Q70JS2|KELC_ANOST(Ring canal kelch homolog OS=Anopheles stephensi OX=30069 GN=kel PE=2 SV=2)	114124248
gene-LOC114121016	yes|up	1	gene-LOC114121016	LOC114121016	nuclear pore complex protein NUP98A-like	1701	31989	58338	10604	57989	107473	125352	1154.23	2084.93	364.71	2186.01	4124.71	4504.92	1201.29	3605.21	3.82799	1.93659	0.000754052	0.00982061	yes	up	XP_027838955.1(nuclear pore complex protein NUP98A-like [Aphis gossypii])	0	0	0	0	0	0	0	0	114121016
gene-LOC114124496	yes|up	1	gene-LOC114124496	LOC114124496	putative nuclease HARBI1	1341	6	6	10	343	335	280	0.29	0.29	0.46	17.34	17.23	13.48	0.346667	16.0167	56.5538	5.82155	1.05e-51	2.42e-48	yes	up	XP_027843555.1(putative nuclease HARBI1 [Aphis gossypii])	0	K23222	HARBI1	0	ENOG411206Y(S:Function unknown); ENOG410XZQD(S:Function unknown)	ENOG411206Y(transposon protein); ENOG410XZQD(-)	PF13359.7(DDE_Tnp_4:DDE superfamily endonuclease); PF04827.15(Plant_tran:Plant transposon protein); PF01609.22(DDE_Tnp_1:Transposase DDE domain)	sp|Q6AZB8|HARB1_DANRE(Putative nuclease HARBI1 OS=Danio rerio OX=7955 GN=harbi1 PE=2 SV=1)	114124496
gene-LOC114129164	yes|up	1	gene-LOC114129164	LOC114129164	clavesin-1-like	1314	3013.27	3653.38	1647.45	3441.85	5461.31	5247.08	146.89	178.1	76.42	174.43	282.9	255.28	133.803	237.537	2.25688	1.17433	0.00119464	0.013976	yes	up	XP_027849615.1(clavesin-1-like [Aphis gossypii])	0	0	0	0	ENOG410XRSQ(E:Amino acid transport and metabolism)	ENOG410XRSQ(aminopeptidase)	PF00650.21(CRAL_TRIO:CRAL/TRIO domain); PF03765.16(CRAL_TRIO_N:CRAL/TRIO, N-terminal domain); PF13716.7(CRAL_TRIO_2:Divergent CRAL/TRIO domain)	sp|Q9D4C9|CLVS1_MOUSE(Clavesin-1 OS=Mus musculus OX=10090 GN=Clvs1 PE=1 SV=1)	114129164
gene-LOC114119891	yes|up	1	gene-LOC114119891	LOC114119891	uncharacterized LOC114119891	1316	24	84	55	769	501	411	1.19	4.12	2.6	39.82	26.4	20.27	2.63667	28.83	13.0004	3.70048	2.13e-15	4.22e-13	yes	up	XP_027837426.1(uncharacterized protein LOC114119891 [Aphis gossypii])	0	0	0	0	ENOG410Z9TD(S:Function unknown)	ENOG410Z9TD(-)	0	0	114119891
gene-LOC114121390	yes|down	1	gene-LOC114121390	LOC114121390	uncharacterized LOC114121390	1356	91	104	129	6	7	7	4.35	4.91	5.87	0.3	0.36	0.33	5.04333	0.33	0.0797172	-3.64896	6.4e-15	1.17e-12	yes	down	XP_027839497.1(LOW QUALITY PROTEIN: uncharacterized protein LOC114121390 [Aphis gossypii])	GO:0015074(biological_process:DNA integration); GO:0003676(molecular_function:nucleic acid binding)	0	0	0	COG2801(L:Replication, recombination and repair); ENOG410Y7Q4(S:Function unknown)	COG2801(Retrotransposon protein); ENOG410Y7Q4(-)	PF18701.2(DUF5641:Family of unknown function (DUF5641))	0	114121390
gene-LOC114132288	yes|down	1	gene-LOC114132288	LOC114132288	0	1882	19	17	12	0	0	0	0.61	0.54	0.37	0	0	0	0.506667	0	0.0150402	-6.05503	1.77e-05	0.00047052	yes	down	KAE9536188.1(hypothetical protein AGLY_007411 [Aphis glycines])	0	0	0	0	ENOG4111S9V(S:Function unknown); ENOG410ZKGY(S:Function unknown)	ENOG4111S9V(-); ENOG410ZKGY(-)	0	0	114132288
gene-LOC114128436	yes|up	1	gene-LOC114128436	LOC114128436	uncharacterized LOC114128436	586	0	1	0	17	5	17	0	0.17	0	3.02	0.9	2.85	0.0566667	2.25667	46.3739	5.53524	0.000161556	0.00293506	yes	up	0	0	0	0	0	0	0	0	0	114128436
gene-LOC114126503	yes|down	1	gene-LOC114126503	LOC114126503	uncharacterized LOC114126503	2502	43	37	37	16	10	12	0.99	0.84	0.81	0.39	0.25	0.28	0.88	0.306667	0.420377	-1.25024	0.00318103	0.0298674	yes	down	XP_027846258.1(uncharacterized protein LOC114126503 [Aphis gossypii])	GO:0016021(cellular_component:integral component of membrane)	0	0	0	ENOG4111Q69(S:Function unknown)	ENOG4111Q69(-)	PF12877.8(DUF3827:Domain of unknown function (DUF3827))	0	114126503
gene-LOC114128059	yes|up	1	gene-LOC114128059	LOC114128059	piggyBac transposable element-derived protein 4-like	1420	0	0	0	72	53	65	0	0	0	2.96	1.8	2.38	0	2.38	445.388	8.79892	1.01e-12	1.35e-10	yes	up	XP_025207394.1(piggyBac transposable element-derived protein 4-like [Melanaphis sacchari])	0	0	0	0	ENOG410YA2Y(S:Function unknown); ENOG410XVJ3(S:Function unknown); ENOG410XP35(S:Function unknown); ENOG4111T8J(S:Function unknown)	ENOG410YA2Y(PiggyBac transposable element-derived protein); ENOG410XVJ3(piggyBac transposable element derived 4); ENOG410XP35(PiggyBac transposable element derived 5); ENOG4111T8J(transposon protein)	PF13843.7(DDE_Tnp_1_7:Transposase IS4)	sp|Q96DM1|PGBD4_HUMAN(PiggyBac transposable element-derived protein 4 OS=Homo sapiens OX=9606 GN=PGBD4 PE=2 SV=3)	114128059
gene-LOC114127197	yes|down	1	gene-LOC114127197	LOC114127197	putative leucine-rich repeat-containing protein DDB_G0290503	2616	36	20	40	8	4	7	0.79	0.43	0.84	0.18	0.09	0.15	0.686667	0.14	0.255386	-1.96925	0.00103084	0.0125846	yes	down	XP_027847174.1(LOW QUALITY PROTEIN: putative leucine-rich repeat-containing protein DDB_G0290503 [Aphis gossypii])	0	0	0	0	0	0	0	0	114127197
gene-LOC114127196	yes|down	1	gene-LOC114127196	LOC114127196	uncharacterized LOC114127196	5574	204	307	351	60	19	16	5.32	8.59	9.11	0.88	0.2	0.17	7.67333	0.416667	0.136972	-2.86805	2.09e-08	1.22e-06	yes	down	XP_027847172.1(uncharacterized protein LOC114127196 [Aphis gossypii])	GO:0004252(molecular_function:serine-type endopeptidase activity)	0	0	0	COG5640(O:Posttranslational modification, protein turnover, chaperones)	COG5640(protease)	PF00089.27(Trypsin:Trypsin); PF00057.19(Ldl_recept_a:Low-density lipoprotein receptor domain class A); PF00084.21(Sushi:Sushi repeat (SCR repeat))	sp|Q9VER6|MODSP_DROME(Modular serine protease OS=Drosophila melanogaster OX=7227 GN=modSP PE=1 SV=2)	114127196
gene-LOC114126112	yes|up	1	gene-LOC114126112	LOC114126112	uncharacterized LOC114126112	3357	179	79	48	246	314	151	2.97	1.3	0.76	4.27	5.56	2.5	1.67667	4.11	3.12346	1.64315	0.000973506	0.012025	yes	up	XP_027845795.1(uncharacterized protein LOC114126112 [Aphis gossypii])	0	0	0	0	ENOG4111GMR(S:Function unknown)	ENOG4111GMR(-)	0	0	114126112
gene-LOC114123375	yes|up	1	gene-LOC114123375	LOC114123375	skin secretory protein xP2-like	2203	3386	9873	2990	14580	30065	24501	90.12	260.54	75.93	405.74	852.11	650.49	142.197	636.113	5.59157	2.48325	2.59e-06	9.14e-05	yes	up	XP_027842119.1(skin secretory protein xP2-like [Aphis gossypii])	0	0	0	0	ENOG4111M7J(S:Function unknown); ENOG410Y20T(S:Function unknown)	ENOG4111M7J(Cuticular protein); ENOG410Y20T(-)	0	0	114123375
gene-LOC114124847	yes|up	1	gene-LOC114124847	LOC114124847	uncharacterized LOC114124847	805	1	1	3	9	9	8	0.1	0.1	0.28	0.92	0.94	0.78	0.16	0.88	6.71459	2.7473	0.00551359	0.0450969	yes	up	KAE9545550.1(hypothetical protein AGLY_001093 [Aphis glycines])	0	0	0	0	ENOG4111H1J(S:Function unknown); ENOG4112AST(S:Function unknown); ENOG410XV2Q(S:Function unknown); ENOG410ZNGY(S:Function unknown)	ENOG4111H1J(-); ENOG4112AST(-); ENOG410XV2Q(Hydra magnipapillata); ENOG410ZNGY(-)	0	0	114124847
gene-LOC114127696	yes|down	1	gene-LOC114127696	LOC114127696	UDP-glucuronosyltransferase 2B2-like, transcript variant X1	1974	1560	491	1533	293	174	115	46	13.97	42.39	9.18	5.62	3.25	34.12	6.01667	0.208645	-2.26088	3.21e-06	0.000109181	yes	down	XP_027847820.1(UDP-glucuronosyltransferase 2B2-like isoform X1 [Aphis gossypii])	GO:0015020(molecular_function:glucuronosyltransferase activity); GO:0016740(molecular_function:transferase activity); GO:0016021(cellular_component:integral component of membrane)	K00699	UGT	map05207(Chemical carcinogenesis - receptor activation); map05204(Chemical carcinogenesis - DNA adducts); map00983(Drug metabolism - other enzymes); map00982(Drug metabolism - cytochrome P450); map01240(Biosynthesis of cofactors); map04976(Bile secretion); map00040(Pentose and glucuronate interconversions); map00980(Metabolism of xenobiotics by cytochrome P450); map00860(Porphyrin and chlorophyll…	COG1819(S:Function unknown)	COG1819(Transferase)	PF00201.19(UDPGT:UDP-glucoronosyl and UDP-glucosyl transferase); PF04101.17(Glyco_tran_28_C:Glycosyltransferase family 28 C-terminal domain)	sp|P08541|UD2B2_RAT(UDP-glucuronosyltransferase 2B2 OS=Rattus norvegicus OX=10116 GN=Ugt2b PE=1 SV=1)	114127696
gene-LOC114121405	yes|up	1	gene-LOC114121405	LOC114121405	homocysteine S-methyltransferase YbgG-like	1185	124.05	77.13	119.8	192.82	188.6	232.13	10.79	6.61	9.88	17.45	17.05	19.95	9.09333	18.15	2.49924	1.32149	1.38e-06	5.22e-05	yes	up	XP_027839549.1(uncharacterized protein LOC114121418 [Aphis gossypii])	GO:0046872(molecular_function:metal ion binding); GO:0032259(biological_process:methylation); GO:0008270(molecular_function:zinc ion binding); GO:0047150(molecular_function:betaine-homocysteine S-methyltransferase activity); GO:0008168(molecular_function:methyltransferase activity); GO:0009086(biological_process:methionine biosynthetic process)	K00547	mmuM, BHMT2	map00270(Cysteine and methionine metabolism)	COG2040(E:Amino acid transport and metabolism); ENOG410Y515(T:Signal transduction mechanisms)	COG2040(Homocysteine s-methyltransferase); ENOG410Y515(associated kinase)	PF02574.17(S-methyl_trans:Homocysteine S-methyltransferase)	sp|O31463|HMT_BACSU(Homocysteine S-methyltransferase YbgG OS=Bacillus subtilis (strain 168) OX=224308 GN=ybgG PE=4 SV=1)	114121405
gene-LOC114122577	yes|up	1	gene-LOC114122577	LOC114122577	tubulin beta chain-like	1395	7772	6739	5856	10030	13078	10589	358.06	307.18	256.9	482.37	640.09	485.12	307.38	535.86	2.17981	1.1242	1.08e-07	5.52e-06	yes	up	XP_008190203.1(tubulin beta chain [Acyrthosiphon pisum])	GO:0005737(cellular_component:cytoplasm); GO:0030537(biological_process:larval behavior); GO:0007017(biological_process:microtubule-based process); GO:0000278(biological_process:mitotic cell cycle); GO:0009416(biological_process:response to light stimulus); GO:0003924(molecular_function:GTPase activity); GO:0005200(molecular_function:structural constituent of cytoskeleton); GO:0000226(biological_…	K07375	TUBB	map04540(Gap junction); map05012(Parkinson disease); map05010(Alzheimer disease); map05016(Huntington disease); map05130(Pathogenic Escherichia coli infection); map05014(Amyotrophic lateral sclerosis); map05132(Salmonella infection); map04145(Phagosome); map05022(Pathways of neurodegeneration - multiple diseases); map05020(Prion disease)	COG5023(S:Function unknown)	COG5023(XK, Kell blood group complex subunit-related family, member)	PF00091.26(Tubulin:Tubulin/FtsZ family, GTPase domain); PF03953.18(Tubulin_C:Tubulin C-terminal domain)	sp|P08841|TBB3_DROME(Tubulin beta-3 chain OS=Drosophila melanogaster OX=7227 GN=betaTub60D PE=2 SV=2)	114122577
gene-LOC114125253	yes|down	1	gene-LOC114125253	LOC114125253	zinc finger BED domain-containing protein 1-like	1581	64	52	32	0	0	0	2.97	2.51	1.37	0	0	0	2.28333	0	0.00489935	-7.6732	2.61e-09	1.84e-07	yes	down	XP_027844630.1(zinc finger BED domain-containing protein 1-like [Aphis gossypii])	GO:0046983(molecular_function:protein dimerization activity); GO:0003677(molecular_function:DNA binding)	K24637	ZBED1	0	ENOG4111T8J(S:Function unknown); ENOG410XUA3(S:Function unknown)	ENOG4111T8J(Immunoglobulin V-set domain); ENOG410XUA3(ZnF_BED)	PF05699.15(Dimer_Tnp_hAT:hAT family C-terminal dimerisation region); PF02892.16(zf-BED:BED zinc finger); PF04937.16(DUF659:Protein of unknown function (DUF 659)); PF14291.7(DUF4371:Domain of unknown function (DUF4371))	sp|O96006|ZBED1_HUMAN(Zinc finger BED domain-containing protein 1 OS=Homo sapiens OX=9606 GN=ZBED1 PE=1 SV=1)	114125253
gene-LOC114125250	yes|down	1	gene-LOC114125250	LOC114125250	uncharacterized LOC114125250, transcript variant X1	2435	470	371	212	138	62.06	47	9.34	7.19	7.24	5.36	1.23	2.5	7.92333	3.03	0.301463	-1.72995	7.87e-05	0.00163874	yes	down	XP_027844627.1(uncharacterized protein LOC114125250 isoform X1 [Aphis gossypii])	GO:0016021(cellular_component:integral component of membrane)	0	0	0	ENOG4111XQ6(S:Function unknown)	ENOG4111XQ6(-)	0	0	114125250
gene-LOC114124532	yes|down	1	gene-LOC114124532	LOC114124532	protein XRP2-like	1191	84	82	80	25	13	30	4.75	4.58	4.3	1.47	0.78	1.68	4.54333	1.31	0.35709	-1.48564	7.47e-05	0.00157003	yes	down	XP_027843616.1(protein XRP2-like [Aphis gossypii])	GO:0005096(molecular_function:GTPase activator activity); GO:0000902(biological_process:cell morphogenesis); GO:0005525(molecular_function:GTP binding)	K18272	RP2	0	ENOG410Y28B(O:Posttranslational modification, protein turnover, chaperones)	ENOG410Y28B(Tubulin folding cofactor C)	PF07986.13(TBCC:Tubulin binding cofactor C)	sp|Q9EPK2|XRP2_MOUSE(Protein XRP2 OS=Mus musculus OX=10090 GN=Rp2 PE=1 SV=3)	114124532
gene-LOC114130829	yes|up	1	gene-LOC114130829	LOC114130829	probable cytochrome P450 6a13	2024	408	252	150	464	798	270	11.98	7.33	4.2	14.24	24.94	7.9	7.83667	15.6933	2.54395	1.34707	0.00571816	0.0463417	yes	up	KAE9534968.1(hypothetical protein AGLY_008260, partial [Aphis glycines])	GO:0005506(molecular_function:iron ion binding); GO:0016705(molecular_function:oxidoreductase activity, acting on paired donors, with incorporation or reduction of molecular oxygen); GO:0016021(cellular_component:integral component of membrane); GO:0004497(molecular_function:monooxygenase activity); GO:0020037(molecular_function:heme binding)	K14999	CYP6	0	COG2124(Q:Secondary metabolites biosynthesis, transport and catabolism)	COG2124(Cytochrome p450)	PF00067.23(p450:Cytochrome P450)	sp|Q9V4U7|C6A14_DROME(Probable cytochrome P450 6a14 OS=Drosophila melanogaster OX=7227 GN=Cyp6a14 PE=3 SV=3)	114130829
gene-LOC114120145	yes|down	1	gene-LOC114120145	LOC114120145	uncharacterized LOC114120145	499	101	81	58	19	30	23	12.09	13.05	6.26	1.98	2.85	1.64	10.4667	2.15667	0.396818	-1.33345	0.000629754	0.00864425	yes	down	0	0	0	0	0	0	0	0	0	114120145
gene-LOC114127670	yes|up	1	gene-LOC114127670	LOC114127670	uncharacterized LOC114127670	513	160	300	591	1293	869	909	22.38	39.36	74.67	295.75	202.98	196.93	45.47	231.887	3.66769	1.87487	8.72e-05	0.00176028	yes	up	XP_027847788.1(uncharacterized protein LOC114127670, partial [Aphis gossypii])	0	0	0	0	ENOG410ZPYK(S:Function unknown)	ENOG410ZPYK(-)	0	0	114127670
gene-LOC114132919	yes|up	1	gene-LOC114132919	LOC114132919	GDP-D-glucose phosphorylase 1-like	1112	0	0	0	58.2	30.7	37.87	0	0	0	3.76	2.02	2.33	0	2.70333	295.015	8.20465	1.23e-10	1.13e-08	yes	up	XP_027854360.1(GDP-D-glucose phosphorylase 1-like [Aphis gossypii])	GO:0080048(molecular_function:GDP-D-glucose phosphorylase activity)	K15630	VTC2	0	ENOG4111FR6(S:Function unknown)	ENOG4111FR6(GDP-D-glucose phosphorylase)	0	sp|Q08CA1|GDPP1_DANRE(GDP-D-glucose phosphorylase 1 OS=Danio rerio OX=7955 GN=gdpgp1 PE=2 SV=1)	114132919
gene-LOC114130689	yes|down	1	gene-LOC114130689	LOC114130689	uncharacterized LOC114130689	4991	60.67	81.34	80.4	33	4	13	5.06	8.02	8.38	3.16	0.54	1.63	7.15333	1.77667	0.279647	-1.83832	0.00384919	0.0346367	yes	down	XP_024871360.1(uncharacterized protein LOC112454296 [Temnothorax curvispinosus])	GO:0004386(molecular_function:helicase activity)	0	0	0	COG0507(L:Replication, recombination and repair); ENOG410Y4KS(S:Function unknown)	COG0507(exodeoxyribonuclease v alpha); ENOG410Y4KS(helicase-like protein)	PF14214.7(Helitron_like_N:Helitron helicase-like domain at N-terminus)	0	114130689
gene-LOC114119095	yes|down	1	gene-LOC114119095	LOC114119095	uncharacterized LOC114119095	1972	214	376	251	111	60	53	6.48	11.28	7.25	3.51	1.93	1.6	8.33667	2.34667	0.337736	-1.56603	3.33e-05	0.000802202	yes	down	XP_027836362.1(uncharacterized protein LOC114119095 [Aphis gossypii])	0	0	0	0	0	0	0	0	114119095
gene-LOC114123873	yes|up	1	gene-LOC114123873	LOC114123873	glyoxylate reductase/hydroxypyruvate reductase-like	1509	431	414	713	1245	1133	1352	22.6	21.58	33.9	59.56	54.54	62.31	26.0267	58.8033	3.08273	1.62421	4.02e-08	2.21e-06	yes	up	XP_027842807.1(glyoxylate reductase/hydroxypyruvate reductase-like [Aphis gossypii])	GO:0051287(molecular_function:NAD binding); GO:0016616(molecular_function:oxidoreductase activity, acting on the CH-OH group of donors, NAD or NADP as acceptor)	K00049	GRHPR	map00630(Glyoxylate and dicarboxylate metabolism); map00260(Glycine, serine and threonine metabolism); map00620(Pyruvate metabolism)	COG1052(C:Energy production and conversion)	COG1052(Dehydrogenase)	PF02826.20(2-Hacid_dh_C:D-isomer specific 2-hydroxyacid dehydrogenase, NAD binding domain); PF00389.31(2-Hacid_dh:D-isomer specific 2-hydroxyacid dehydrogenase, catalytic domain); PF00670.22(AdoHcyase_NAD:S-adenosyl-L-homocysteine hydrolase, NAD binding domain); PF03807.18(F420_oxidored:NADP oxidoreductase coenzyme F420-dependent)	sp|Q91Z53|GRHPR_MOUSE(Glyoxylate reductase/hydroxypyruvate reductase OS=Mus musculus OX=10090 GN=Grhpr PE=1 SV=1)	114123873
gene-LOC114128549	yes|up	1	gene-LOC114128549	LOC114128549	DNA polymerase beta-like	489	0	0	0	16.41	7.02	3.1	0	0	0	4.28	1.85	0.76	0	2.29667	59.4976	5.89476	0.000426333	0.00634697	yes	up	XP_027848864.1(DNA polymerase beta-like [Aphis gossypii])	GO:0006284(biological_process:base-excision repair); GO:0006303(biological_process:double-strand break repair via nonhomologous end joining); GO:0006281(biological_process:DNA repair); GO:0005634(cellular_component:nucleus); GO:0003887(molecular_function:DNA-directed DNA polymerase activity); GO:0003677(molecular_function:DNA binding); GO:0046872(molecular_function:metal ion binding)	K02330	POLB	map05166(Human T-cell leukemia virus 1 infection); map03410(Base excision repair); map05203(Viral carcinogenesis)	COG1796(L:Replication, recombination and repair)	COG1796(DNA polymerase)	PF14791.7(DNA_pol_B_thumb:DNA polymerase beta thumb); PF14792.7(DNA_pol_B_palm:DNA polymerase beta palm)	sp|P06746|DPOLB_HUMAN(DNA polymerase beta OS=Homo sapiens OX=9606 GN=POLB PE=1 SV=3)	114128549
gene-LOC114120584	yes|up	1	gene-LOC114120584	LOC114120584	uncharacterized LOC114120584, transcript variant X1	1062	0	0	6.8	19.69	38.06	25.32	0	0	0.43	1.36	2.68	1.66	0.143333	1.9	15.1729	3.92343	0.000704046	0.00933855	yes	up	XP_027838335.1(uncharacterized protein LOC114120584 isoform X1 [Aphis gossypii])	0	K05673	ABCC4	map04024(cAMP signaling pathway); map01523(Antifolate resistance); map02010(ABC transporters); map04976(Bile secretion)	0	0	0	0	114120584
gene-LOC114123792	yes|down	1	gene-LOC114123792	LOC114123792	matrix metalloproteinase-2-like	1980	213	335	343	133	92	91	5.51	9.24	8.8	3.98	2.73	2.65	7.85	3.12	0.451827	-1.14616	0.000274838	0.00451519	yes	down	XP_027842683.1(matrix metalloproteinase-2-like [Aphis gossypii])	GO:0004222(molecular_function:metalloendopeptidase activity); GO:0008270(molecular_function:zinc ion binding); GO:0031012(cellular_component:extracellular matrix)	K07997;K08002	MMP17;MMP24	map04928(Parathyroid hormone synthesis, secretion and action)	ENOG410XQ5D(S:Function unknown)	ENOG410XQ5D(Dehydrogenase)	PF00413.25(Peptidase_M10:Matrixin); PF00045.20(Hemopexin:Hemopexin); PF01471.19(PG_binding_1:Putative peptidoglycan binding domain)	sp|O18927|MMP13_HORSE(Collagenase 3 OS=Equus caballus OX=9796 GN=MMP13 PE=2 SV=1)	114123792
gene-LOC114128225	yes|down	1	gene-LOC114128225	LOC114128225	cyclin-dependent kinase-like 2	799	44.25	31.03	16.62	4.25	2.8	0	4.42	3.05	1.57	0.44	0.3	0	3.01333	0.246667	0.0995146	-3.32895	0.000104213	0.00204514	yes	down	XP_027848502.1(cyclin-dependent kinase-like 2 [Aphis gossypii])	GO:0004674(molecular_function:protein serine/threonine kinase activity); GO:0005524(molecular_function:ATP binding); GO:0004672(molecular_function:protein kinase activity)	K08824	CDKL	0	ENOG410XNSW(T:Signal transduction mechanisms)	ENOG410XNSW(Cyclin-dependent kinase-like)	PF00069.26(Pkinase:Protein kinase domain); PF07714.18(PK_Tyr_Ser-Thr:Protein tyrosine and serine/threonine kinase)	sp|Q92772|CDKL2_HUMAN(Cyclin-dependent kinase-like 2 OS=Homo sapiens OX=9606 GN=CDKL2 PE=1 SV=1)	114128225
gene-LOC114125853	yes|down	1	gene-LOC114125853	LOC114125853	putative glycine-rich cell wall structural protein 1	411	7	6	6	0	0	0	2.79	2.3	2.22	0	0	0	2.43667	0	0.0378455	-4.72374	0.00508218	0.0424955	yes	down	XP_027845453.1(putative glycine-rich cell wall structural protein 1 [Aphis gossypii])	GO:0043565(molecular_function:sequence-specific DNA binding); GO:0005634(cellular_component:nucleus); GO:0006355(biological_process:regulation of transcription, DNA-templated)	K09330	PHOX2, PMX2	0	ENOG4111YNP(K:Transcription)	ENOG4111YNP(Paired-like homeobox 2b)	0	0	114125853
gene-LOC114127371	yes|up	1	gene-LOC114127371	LOC114127371	40S ribosomal protein S20-like	578	323.41	317.06	364.27	8277.98	9206.83	9677.25	54.52	52.26	56.46	1505.37	1697.12	1662.25	54.4133	1621.58	35.2617	5.14003	9.87e-149	1.13e-144	yes	up	XP_027847395.1(40S ribosomal protein S20-like [Aphis gossypii])	GO:0003735(molecular_function:structural constituent of ribosome); GO:0003723(molecular_function:RNA binding); GO:0006412(biological_process:translation); GO:0015935(cellular_component:small ribosomal subunit)	K02969	RP-S20e, RPS20	map03010(Ribosome); map05171(Coronavirus disease - COVID-19)	COG0051(J:Translation, ribosomal structure and biogenesis)	COG0051(tRNA binding)	PF00338.23(Ribosomal_S10:Ribosomal protein S10p/S20e)	sp|P23403|RS20_XENLA(40S ribosomal protein S20 OS=Xenopus laevis OX=8355 GN=rps20 PE=1 SV=1)	114127371
gene-LOC114127279	yes|up	1	gene-LOC114127279	LOC114127279	anosmin-1	2243	305.09	178.85	167.24	541.52	554.46	207.52	8.4	5.19	4.52	15.66	16.03	5.54	6.03667	12.41	2.63435	1.39745	0.000889393	0.0111372	yes	up	XP_027847271.1(anosmin-1 [Aphis gossypii])	GO:0016021(cellular_component:integral component of membrane); GO:0005576(cellular_component:extracellular region); GO:0030414(molecular_function:peptidase inhibitor activity)	K23413	ANOS1, KAL1, WFDC19	0	ENOG4111T0F(S:Function unknown)	ENOG4111T0F(Kallmann syndrome 1 sequence)	PF00041.22(fn3:Fibronectin type III domain); PF00095.22(WAP:WAP-type (Whey Acidic Protein) 'four-disulfide core')	sp|P33005|KALM_CHICK(Anosmin-1 OS=Gallus gallus OX=9031 GN=ANOS1 PE=2 SV=2)	114127279
gene-LOC114132600	yes|up	1	gene-LOC114132600	LOC114132600	UDP-glucuronosyltransferase 2B10-like, transcript variant X1	1894	18.04	0	25.07	74.87	113.16	102.6	0.57	0	0.77	2.31	3.71	3.27	0.446667	3.09667	8.91448	3.15615	0.000365274	0.00566126	yes	up	XP_027853907.1(UDP-glucuronosyltransferase 2B10-like isoform X1 [Aphis gossypii])	GO:0015020(molecular_function:glucuronosyltransferase activity); GO:0016021(cellular_component:integral component of membrane)	0	0	0	COG1819(S:Function unknown)	COG1819(Transferase)	PF00201.19(UDPGT:UDP-glucoronosyl and UDP-glucosyl transferase); PF04101.17(Glyco_tran_28_C:Glycosyltransferase family 28 C-terminal domain); PF13439.7(Glyco_transf_4:Glycosyltransferase Family 4)	sp|P36537|UDB10_HUMAN(UDP-glucuronosyltransferase 2B10 OS=Homo sapiens OX=9606 GN=UGT2B10 PE=1 SV=1)	114132600
gene-LOC114132214	yes|down	1	gene-LOC114132214	LOC114132214	uncharacterized LOC114132214	2441	193	62	65	35	10	26	4.57	1.46	1.47	0.87	0.25	0.61	2.5	0.576667	0.290434	-1.78372	0.00277654	0.0267646	yes	down	XP_027853415.1(uncharacterized protein LOC114132214 [Aphis gossypii])	0	0	0	0	ENOG410YRBN(S:Function unknown); ENOG41120RA(S:Function unknown); ENOG410YX73(S:Function unknown)	ENOG410YRBN(-); ENOG41120RA(-); ENOG410YX73(-)	PF16009.6(DUF4779:Domain of unknown function (DUF4779))	0	114132214
gene-LOC114131152	yes|up	1	gene-LOC114131152	LOC114131152	protein transport protein Sec61 subunit gamma	471	863	883	714	2108	2448	2273	218.36	221.96	172.11	572.66	670.08	578.7	204.143	607.147	3.63585	1.86229	3.78e-23	1.45e-20	yes	up	XP_001949988.2(protein transport protein Sec61 subunit gamma [Acyrthosiphon pisum])	GO:0015450(molecular_function:P-P-bond-hydrolysis-driven protein transmembrane transporter activity); GO:0016021(cellular_component:integral component of membrane); GO:0045047(biological_process:protein targeting to ER); GO:0005789(cellular_component:endoplasmic reticulum membrane); GO:0006605(biological_process:protein targeting); GO:0008320(molecular_function:protein transmembrane transporter a…	K07342	SEC61G, SSS1, secE	map04145(Phagosome); map03060(Protein export); map04141(Protein processing in endoplasmic reticulum); map05110(Vibrio cholerae infection)	ENOG4111WJ7(U:Intracellular trafficking, secretion, and vesicular transport)	ENOG4111WJ7(protein transport protein sec61)	PF00584.21(SecE:SecE/Sec61-gamma subunits of protein translocation complex)	sp|Q7Z1B8|S61G1_GRYOR(Protein transport protein Sec61 subunit gamma OS=Gryllotalpa orientalis OX=213494 GN=SEC61G PE=3 SV=1)	114131152
gene-LOC114127240	yes|up	1	gene-LOC114127240	LOC114127240	putative ankyrin repeat protein RF_0987	330	0	0	0	10.26	4.33	9.25	0	0	0	8.79	3.7	7.18	0	6.55667	53.3912	5.73853	0.000320595	0.00509937	yes	up	XP_027847228.1(uncharacterized protein LOC114127240 [Aphis gossypii])	GO:0015031(biological_process:protein transport)	K19476	IST1	map04144(Endocytosis)	ENOG410YG52(S:Function unknown)	ENOG410YG52(positive regulation of collateral sprouting)	0	0	114127240
gene-LOC114121652	yes|up	1	gene-LOC114121652	LOC114121652	uncharacterized LOC114121652	611	133.49	169.27	151.13	283.57	224.34	263.22	21.14	26.21	22.54	46.46	37.25	40.73	23.2967	41.48	2.19557	1.13459	1.36e-07	6.88e-06	yes	up	XP_027839875.1(unconventional myosin-Va-like isoform X2 [Aphis gossypii])	0	K16677	DACHS	map04391(Hippo signaling pathway - fly)	COG5022(Z:Cytoskeleton)	COG5022(myosin heavy chain)	0	0	114121652
gene-LOC114122479	yes|up	1	gene-LOC114122479	LOC114122479	39S ribosomal protein L23, mitochondrial-like	659	0	0	0	34.58	92.09	195.17	0	0	0	4.94	13.34	26.37	0	14.8833	776.643	9.60111	5.21e-12	5.68e-10	yes	up	XP_027840951.1(39S ribosomal protein L23, mitochondrial-like [Aphis gossypii])	GO:0003735(molecular_function:structural constituent of ribosome); GO:0006412(biological_process:translation); GO:0005840(cellular_component:ribosome)	K02892	RP-L23, MRPL23, rplW	map03010(Ribosome)	ENOG4111IAB(J:Translation, ribosomal structure and biogenesis)	ENOG4111IAB((ribosomal) protein)	PF00276.21(Ribosomal_L23:Ribosomal protein L23)	sp|Q9W021|RM23_DROME(39S ribosomal protein L23, mitochondrial OS=Drosophila melanogaster OX=7227 GN=mRpL23 PE=2 SV=1)	114122479
gene-LOC114125002	yes|up	1	gene-LOC114125002	LOC114125002	52 kDa repressor of the inhibitor of the protein kinase-like	619	3	3	5	51	42	76	0.46	0.45	0.89	8.37	7.18	12.09	0.6	9.21333	19.9466	4.31807	1.52e-12	1.98e-10	yes	up	XP_027844276.1(52 kDa repressor of the inhibitor of the protein kinase-like [Aphis gossypii])	GO:0016787(molecular_function:hydrolase activity); GO:0003677(molecular_function:DNA binding)	0	0	0	ENOG410XPZ3(S:Function unknown)	ENOG410XPZ3(prostaglandin G H synthase and cyclooxygenase)	PF05485.13(THAP:THAP domain)	sp|O43422|P52K_HUMAN(52 kDa repressor of the inhibitor of the protein kinase OS=Homo sapiens OX=9606 GN=THAP12 PE=1 SV=2)	114125002
gene-LOC114120273	yes|down	1	gene-LOC114120273	LOC114120273	putative uncharacterized protein DDB_G0282133	3612	43	65	70	11	24	7	4.69	8.25	8.05	1.62	2.85	0.97	6.99667	1.81333	0.308036	-1.69883	0.00357762	0.0328615	yes	down	XP_027837940.1(putative uncharacterized protein DDB_G0282133, partial [Aphis gossypii])	0	0	0	0	0	0	0	0	114120273
gene-LOC114126599	yes|down	1	gene-LOC114126599	LOC114126599	beta-galactosidase-like	2114	149	186.12	450	17.15	40.18	4.06	4.67	5.79	13.67	0.51	1.23	0.12	8.04333	0.62	0.100917	-3.30876	1.27e-05	0.000356984	yes	down	XP_027846387.1(beta-galactosidase-like [Aphis gossypii])	GO:0005975(biological_process:carbohydrate metabolic process); GO:0004565(molecular_function:beta-galactosidase activity)	K12309	GLB1, ELNR1	map00600(Sphingolipid metabolism); map00604(Glycosphingolipid biosynthesis - ganglio series); map00052(Galactose metabolism); map00511(Other glycan degradation); map00531(Glycosaminoglycan degradation); map04142(Lysosome)	COG1874(G:Carbohydrate transport and metabolism)	COG1874(beta-galactosidase)	PF01301.20(Glyco_hydro_35:Glycosyl hydrolases family 35); PF02449.16(Glyco_hydro_42:Beta-galactosidase); PF13364.7(BetaGal_dom4_5:Beta-galactosidase jelly roll domain)	sp|Q9TRY9|BGAL_CANLF(Beta-galactosidase OS=Canis lupus familiaris OX=9615 GN=GLB1 PE=1 SV=3)	114126599
gene-LOC114131251	yes|up	1	gene-LOC114131251	LOC114131251	uncharacterized LOC114131251	1234	90.83	116.58	96.1	130.68	194.91	250.71	3.53	5.37	3.86	5.33	7.28	9.34	4.25333	7.31667	2.49043	1.31639	0.000201056	0.00350324	yes	up	KAE9543279.1(hypothetical protein AGLY_003190 [Aphis glycines])	0	0	0	0	0	0	0	0	114131251
gene-LOC114132596	yes|down	1	gene-LOC114132596	LOC114132596	uncharacterized LOC114132596	1676	15	10	8	0	0	0	0.55	0.36	0.28	0	0	0	0.396667	0	0.0219946	-5.50671	0.000278579	0.00455713	yes	down	XP_027853901.1(uncharacterized protein LOC114132596 [Aphis gossypii])	0	0	0	0	ENOG410XSUP(S:Function unknown)	ENOG410XSUP(sterile alpha motif domain containing)	0	0	114132596
gene-LOC114123800	yes|down	1	gene-LOC114123800	LOC114123800	uncharacterized LOC114123800	4342	324	509	512	77	80	62	3.97	6.23	6	1	1.04	0.75	5.4	0.93	0.20947	-2.25519	9.95e-13	1.35e-10	yes	down	XP_027842694.1(LOW QUALITY PROTEIN: uncharacterized protein LOC114123800 [Aphis gossypii])	0	0	0	0	COG0515(T:Signal transduction mechanisms)	COG0515(Serine Threonine protein kinase)	PF01822.20(WSC:WSC domain); PF00069.26(Pkinase:Protein kinase domain); PF07714.18(PK_Tyr_Ser-Thr:Protein tyrosine and serine/threonine kinase); PF13855.7(LRR_8:Leucine rich repeat); PF14580.7(LRR_9:Leucine-rich repeat)	sp|Q05652|KPEL_DROME(Serine/threonine-protein kinase pelle OS=Drosophila melanogaster OX=7227 GN=pll PE=1 SV=1)	114123800
gene-LOC114129079	yes|down	1	gene-LOC114129079	LOC114129079	NAD-dependent protein deacetylase HST1-like	2258	1285	1682.49	1272.05	479	333.71	224.94	46.19	65.64	40.49	20.7	13.19	5.81	50.7733	13.2333	0.313432	-1.67377	1.89e-08	1.12e-06	yes	down	XP_027849516.1(NAD-dependent protein deacetylase HST1-like [Aphis gossypii])	0	0	0	0	0	0	0	0	114129079
gene-LOC114123651	yes|down	1	gene-LOC114123651	LOC114123651	protein eyes shut	5123	166	128	105	35	30	68	1.75	1.34	1.06	0.39	0.34	0.72	1.38333	0.483333	0.438428	-1.18959	0.00305199	0.0289825	yes	down	XP_027842504.1(LOW QUALITY PROTEIN: protein eyes shut [Aphis gossypii])	GO:0005509(molecular_function:calcium ion binding); GO:0030246(molecular_function:carbohydrate binding)	K19601	EYS	0	ENOG410XTD2(S:Function unknown); ENOG410XS9U(S:Function unknown)	ENOG410XTD2(Transfer protein); ENOG410XS9U(protein eyes shut homolog)	PF00008.28(EGF:EGF-like domain); PF02210.25(Laminin_G_2:Laminin G domain); PF00054.24(Laminin_G_1:Laminin G domain); PF12661.8(hEGF:Human growth factor-like EGF); PF07974.14(EGF_2:EGF-like domain)	sp|A0A1F4|EYS_DROME(Protein eyes shut OS=Drosophila melanogaster OX=7227 GN=eys PE=1 SV=1)	114123651
gene-LOC114127401	yes|up	1	gene-LOC114127401	LOC114127401	E3 SUMO-protein ligase KIAA1586-like	2250	0	0	0	66	59	64	0	0	0	1.73	1.59	1.59	0	1.63667	444.899	8.79733	9.25e-13	1.27e-10	yes	up	XP_027847427.1(E3 SUMO-protein ligase KIAA1586-like [Aphis gossypii])	0	0	0	0	ENOG410ZI9G(S:Function unknown); COG5048(S:Function unknown)	ENOG410ZI9G(-); COG5048(-)	PF14291.7(DUF4371:Domain of unknown function (DUF4371)); PF04937.16(DUF659:Protein of unknown function (DUF 659))	sp|Q9HCI6|K1586_HUMAN(E3 SUMO-protein ligase KIAA1586 OS=Homo sapiens OX=9606 GN=KIAA1586 PE=1 SV=2)	114127401
gene-LOC114120290	yes|down	1	gene-LOC114120290	LOC114120290	uncharacterized LOC114120290	1498	39	65	36	5	4	3	1.47	2.48	1.26	0.22	0.18	0.13	1.73667	0.176667	0.110517	-3.17766	4.48e-07	1.92e-05	yes	down	XP_027837956.1(uncharacterized protein LOC114120290 [Aphis gossypii])	0	0	0	0	0	0	0	0	114120290
gene-LOC114127402	yes|up	1	gene-LOC114127402	LOC114127402	patched domain-containing protein 3-like	2886	1352	625	139	1719	2845	1220	27.57	12.16	2.74	36.9	63.17	24.87	14.1567	41.6467	3.7393	1.90277	0.00402374	0.0357053	yes	up	XP_027847428.1(patched domain-containing protein 3-like, partial [Aphis gossypii])	GO:0016021(cellular_component:integral component of membrane)	K24682	PTCHD	0	ENOG410XRZ4(S:Function unknown)	ENOG410XRZ4(patched domain containing)	PF02460.19(Patched:Patched family); PF12349.9(Sterol-sensing:Sterol-sensing domain of SREBP cleavage-activation)	sp|Q0EEE2|PTHD3_MOUSE(Patched domain-containing protein 3 OS=Mus musculus OX=10090 GN=Ptchd3 PE=1 SV=1)	114127402
gene-LOC114121879	yes|up	1	gene-LOC114121879	LOC114121879	vicilin-like seed storage protein At2g18540	1686	2	3	10	688	438	349	0.07	0.11	0.33	25.29	16.38	12.06	0.17	17.91	124.882	6.96443	9.79e-40	1.25e-36	yes	up	XP_027840173.1(vicilin-like seed storage protein At2g18540 [Aphis gossypii])	0	0	0	0	0	0	0	0	114121879
gene-LOC114133145	yes|down	1	gene-LOC114133145	LOC114133145	facilitated trehalose transporter Tret1-like, transcript variant X1	2638	424	640	1081	167	161	237	6.63	10.74	16.71	2.77	2.78	3.65	11.36	3.06667	0.33709	-1.56879	0.000183817	0.00324715	yes	down	XP_027854602.1(facilitated trehalose transporter Tret1-like isoform X1 [Aphis gossypii])	GO:0022857(molecular_function:transmembrane transporter activity); GO:0016021(cellular_component:integral component of membrane)	0	0	0	ENOG410XNQK(G:Carbohydrate transport and metabolism)	ENOG410XNQK(Transporter)	PF00083.25(Sugar_tr:Sugar (and other) transporter); PF07690.17(MFS_1:Major Facilitator Superfamily)	sp|A9ZSY3|TRET1_BOMMO(Facilitated trehalose transporter Tret1 OS=Bombyx mori OX=7091 GN=Tret1 PE=1 SV=1)	114133145
gene-LOC114119372	yes|down	1	gene-LOC114119372	LOC114119372	uncharacterized LOC114119372, transcript variant X1	2643	17	30	14	0	1	3	0.37	0.64	0.29	0	0.02	0.07	0.433333	0.03	0.0858751	-3.54162	0.000653366	0.00882095	yes	down	XP_027836698.1(uncharacterized protein LOC114119372 [Aphis gossypii])	GO:0016021(cellular_component:integral component of membrane)	0	0	0	0	0	0	0	114119372
gene-LOC114129048	yes|down	1	gene-LOC114129048	LOC114129048	histone-lysine N-methyltransferase, H3 lysine-79 specific-like	1078	6012	9647	6576	4457	2449	1733	372.62	588.58	390.38	289.07	161.56	107.3	450.527	185.977	0.491625	-1.02437	0.00510951	0.042672	yes	down	XP_027849472.1(histone-lysine N-methyltransferase, H3 lysine-79 specific-like [Aphis gossypii])	0	0	0	0	0	0	0	0	114129048
gene-LOC114119870	yes|up	1	gene-LOC114119870	LOC114119870	lactase-phlorizin hydrolase-like	1772	5787.07	12631.5	8563.47	30681.9	34033.3	23627.9	198.81	429.87	280.47	1101.35	1243.86	808.69	303.05	1051.3	4.21619	2.07594	3.7e-09	2.55e-07	yes	up	XP_027837390.1(lactase-phlorizin hydrolase-like [Aphis gossypii])	GO:0005975(biological_process:carbohydrate metabolic process); GO:0004553(molecular_function:hydrolase activity, hydrolyzing O-glycosyl compounds)	0	0	0	COG2723(G:Carbohydrate transport and metabolism)	COG2723(beta-glucosidase)	PF00232.19(Glyco_hydro_1:Glycosyl hydrolase family 1)	sp|Q95X01|MYRO1_BREBR(Myrosinase 1 OS=Brevicoryne brassicae OX=69196 PE=1 SV=1)	114119870
gene-LOC114127476	yes|down	1	gene-LOC114127476	LOC114127476	uncharacterized LOC114127476	1272	160	202	148	46	19	18	12.42	14.62	10.97	2.9	1.46	1.25	12.67	1.87	0.206846	-2.27337	1.4e-08	8.57e-07	yes	down	XP_027847519.1(uncharacterized protein LOC114127476 [Aphis gossypii])	0	0	0	0	0	0	0	0	114127476
gene-LOC114119876	yes|up	1	gene-LOC114119876	LOC114119876	0	1330	26	8	23	1944.24	894.77	1631.27	1.27	0.39	1.07	99.32	46.51	79.37	0.91	75.0667	101.031	6.65865	7.1e-56	2.04e-52	yes	up	KAE9538904.1(hypothetical protein AGLY_005486 [Aphis glycines])	GO:0005975(biological_process:carbohydrate metabolic process); GO:0004553(molecular_function:hydrolase activity, hydrolyzing O-glycosyl compounds)	0	0	0	COG2723(G:Carbohydrate transport and metabolism)	COG2723(beta-glucosidase)	0	sp|Q95X01|MYRO1_BREBR(Myrosinase 1 OS=Brevicoryne brassicae OX=69196 PE=1 SV=1)	114119876
gene-LOC114125381	yes|down	1	gene-LOC114125381	LOC114125381	uncharacterized LOC114125381	1673	889.7	1479.66	1333	345	292	184.37	32.75	53.95	46.77	13.27	11.43	6.76	44.49	10.4867	0.283272	-1.81974	4.08e-08	2.24e-06	yes	down	XP_027844798.1(uncharacterized protein LOC114125381 [Aphis gossypii])	0	0	0	0	0	0	0	0	114125381
gene-LOC114121272	yes|down	1	gene-LOC114121272	LOC114121272	phosphoenolpyruvate carboxykinase [GTP]-like	2308	5169	10307	14137	2217	2854	3726	130	257.17	339.43	58.34	76.37	93.62	242.2	76.11	0.382126	-1.38788	0.00137835	0.0156786	yes	down	XP_027839326.1(phosphoenolpyruvate carboxykinase [GTP]-like [Aphis gossypii])	GO:0004613(molecular_function:phosphoenolpyruvate carboxykinase (GTP) activity); GO:0016301(molecular_function:kinase activity); GO:0006094(biological_process:gluconeogenesis); GO:0005525(molecular_function:GTP binding)	K01596	E4.1.1.32, pckA, PCK	map04920(Adipocytokine signaling pathway); map04964(Proximal tubule bicarbonate reclamation); map00620(Pyruvate metabolism); map04068(FoxO signaling pathway); map00010(Glycolysis / Gluconeogenesis); map04922(Glucagon signaling pathway); map04910(Insulin signaling pathway); map03320(PPAR signaling pathway); map00020(Citrate cycle (TCA cycle)); map04151(PI3K-Akt signaling pathway); map04152(AMPK si…	COG1274(C:Energy production and conversion)	COG1274(Catalyzes the conversion of oxaloacetate (OAA) to phosphoenolpyruvate (PEP), the rate-limiting step in the metabolic pathway that produces glucose from lactate and other precursors derived from the citric acid cycle (By similarity))	PF00821.19(PEPCK_GTP:Phosphoenolpyruvate carboxykinase C-terminal P-loop domain); PF17297.3(PEPCK_N:Phosphoenolpyruvate carboxykinase N-terminal domain)	sp|Q16822|PCKGM_HUMAN(Phosphoenolpyruvate carboxykinase [GTP], mitochondrial OS=Homo sapiens OX=9606 GN=PCK2 PE=1 SV=4)	114121272
gene-LOC114121274	yes|down	1	gene-LOC114121274	LOC114121274	uncharacterized LOC114121274, transcript variant X1	1417	98	151	451	28	32	23	4.53	7.28	20.23	1.32	1.55	1.27	10.68	1.38	0.150331	-2.73378	9.83e-06	0.000291253	yes	down	0	0	0	0	0	0	0	0	0	114121274
gene-LOC114122177	yes|down	1	gene-LOC114122177	LOC114122177	kinesin-like protein KIF19	1552	981	1793	1507	363	276	252	31.26	56.61	45.79	12.09	17.57	8	44.5533	12.5533	0.265464	-1.91341	4.44e-10	3.57e-08	yes	down	XP_025195847.1(kinesin-like protein KIF19 [Melanaphis sacchari])	GO:0005874(cellular_component:microtubule); GO:0008017(molecular_function:microtubule binding); GO:0007018(biological_process:microtubule-based movement); GO:0003777(molecular_function:microtubule motor activity); GO:0005524(molecular_function:ATP binding)	K10401	KIF18_19	0	COG5059(S:Function unknown)	COG5059(-)	PF00225.24(Kinesin:Kinesin motor domain); PF16796.6(Microtub_bd:Microtubule binding)	sp|Q7ZXX2|KIF19_XENLA(Kinesin-like protein KIF19 OS=Xenopus laevis OX=8355 GN=kif19 PE=2 SV=1)	114122177
gene-LOC114131320	yes|down	1	gene-LOC114131320	LOC114131320	uncharacterized LOC114131320	799	1320	2377	1616	1028	593	468	129.62	229.93	150.89	106.03	61.71	45.19	170.147	70.9767	0.497756	-1.00649	0.00481321	0.04082	yes	down	XP_027852310.1(uncharacterized protein LOC114131320 [Aphis gossypii])	0	0	0	0	0	0	0	0	114131320
gene-LOC114122271	yes|down	1	gene-LOC114122271	LOC114122271	zinc finger MYM-type protein 1-like	2005	43	44	39	15	2	3	1.28	1.29	1.1	0.47	0.06	0.09	1.22333	0.206667	0.198918	-2.32976	0.000972265	0.0120226	yes	down	XP_027840680.1(zinc finger MYM-type protein 1-like [Aphis gossypii])	0	0	0	0	ENOG410Z0SF(S:Function unknown); ENOG410YI05(S:Function unknown); ENOG4110ZMY(S:Function unknown); ENOG410XQ1Y(S:Function unknown)	ENOG410Z0SF(ZnF_TTF); ENOG410YI05(52 kDa repressor of the inhibitor of the protein); ENOG4110ZMY(protein-kinase, interferon-inducible double stranded RNA dependent inhibitor, repressor of (P58 repressor)); ENOG410XQ1Y(zinc finger)	PF14291.7(DUF4371:Domain of unknown function (DUF4371))	sp|O43422|P52K_HUMAN(52 kDa repressor of the inhibitor of the protein kinase OS=Homo sapiens OX=9606 GN=THAP12 PE=1 SV=2)	114122271
gene-LOC114130608	yes|up	1	gene-LOC114130608	LOC114130608	somatomedin-B and thrombospondin type-1 domain-containing protein-like	788	58	88	51	391	294	191	5.93	8.84	4.93	41.51	31.7	19.23	6.56667	30.8133	5.7098	2.51344	1.6e-12	2.07e-10	yes	up	XP_027851414.1(somatomedin-B and thrombospondin type-1 domain-containing protein-like [Aphis gossypii])	0	0	0	0	ENOG4111K8M(S:Function unknown); ENOG411278B(S:Function unknown)	ENOG4111K8M(somatomedin B and thrombospondin, type 1 domain containing); ENOG411278B(Somatomedin B domain)	PF01033.18(Somatomedin_B:Somatomedin B domain)	sp|Q8IVN8|SBSPO_HUMAN(Somatomedin-B and thrombospondin type-1 domain-containing protein OS=Homo sapiens OX=9606 GN=SBSPON PE=1 SV=2)	114130608
gene-LOC114125595	yes|up	1	gene-LOC114125595	LOC114125595	acetyl-coenzyme A transporter 1-like, transcript variant X2	1778	1.34	6.82	8.37	228.76	275.06	295.66	0.02	0.11	0.13	7.23	9.53	9.17	0.0866667	8.64333	64.8898	6.01992	2.86e-34	2.35e-31	yes	up	XP_027845117.1(acetyl-coenzyme A transporter 1-like [Aphis gossypii])	GO:0008521(molecular_function:acetyl-CoA transporter activity); GO:0016021(cellular_component:integral component of membrane)	K03372	SLC33A1, ACATN	map00604(Glycosphingolipid biosynthesis - ganglio series)	COG0477(I:Lipid transport and metabolism)	COG0477(Carboxylesterase)	PF13000.8(Acatn:Acetyl-coenzyme A transporter 1)	sp|O00400|ACATN_HUMAN(Acetyl-coenzyme A transporter 1 OS=Homo sapiens OX=9606 GN=SLC33A1 PE=1 SV=1)	114125595
gene-LOC114130604	yes|down	1	gene-LOC114130604	LOC114130604	cardio acceleratory peptide 2b-like	859	430	621	387	201	158	125	38.46	54.7	32.82	18.7	14.93	11.04	41.9933	14.89	0.433367	-1.20634	2.88e-05	0.000721599	yes	down	XP_027851410.1(cardio acceleratory peptide 2b-like [Aphis gossypii])	GO:0007218(biological_process:neuropeptide signaling pathway); GO:0005576(cellular_component:extracellular region); GO:0005184(molecular_function:neuropeptide hormone activity)	0	0	0	ENOG410ZUQ4(S:Function unknown)	ENOG410ZUQ4(-)	PF08259.12(Periviscerokin:Periviscerokinin family)	0	114130604
gene-LOC114119987	yes|up	1	gene-LOC114119987	LOC114119987	UDP-glucuronosyltransferase 1-7C-like	1918	4	5	11	42.71	17	13	0.13	0.15	0.33	1.4	0.57	0.41	0.203333	0.793333	4.5537	2.18704	0.00317883	0.0298674	yes	up	XP_027837544.1(UDP-glucuronosyltransferase 1-7C-like [Aphis gossypii])	GO:0015020(molecular_function:glucuronosyltransferase activity); GO:0016021(cellular_component:integral component of membrane)	K00699	UGT	map05207(Chemical carcinogenesis - receptor activation); map05204(Chemical carcinogenesis - DNA adducts); map00983(Drug metabolism - other enzymes); map00982(Drug metabolism - cytochrome P450); map01240(Biosynthesis of cofactors); map04976(Bile secretion); map00040(Pentose and glucuronate interconversions); map00980(Metabolism of xenobiotics by cytochrome P450); map00860(Porphyrin and chlorophyll…	COG1819(S:Function unknown)	COG1819(Transferase)	PF00201.19(UDPGT:UDP-glucoronosyl and UDP-glucosyl transferase); PF04101.17(Glyco_tran_28_C:Glycosyltransferase family 28 C-terminal domain)	sp|Q6ZQM8|UD17C_MOUSE(UDP-glucuronosyltransferase 1-7C OS=Mus musculus OX=10090 GN=Ugt1a7c PE=1 SV=1)	114119987
gene-LOC114129148	yes|up	1	gene-LOC114129148	LOC114129148	protein D2-like	902	1561	1413	652	2711	2428	2895	129.81	115.8	51.44	234.62	213.55	237.99	99.0167	228.72	2.91705	1.54451	1.33e-06	5.06e-05	yes	up	XP_027849596.1(protein D2-like [Aphis gossypii])	0	K06910	PEBP, TFS1	0	COG1881(S:Function unknown)	COG1881(phosphatidylethanolamine-binding protein)	PF01161.21(PBP:Phosphatidylethanolamine-binding protein)	sp|O16264|PEBPH_CAEEL(Phosphatidylethanolamine-binding protein homolog F40A3.3 OS=Caenorhabditis elegans OX=6239 GN=F40A3.3 PE=3 SV=1)	114129148
gene-LOC114120054	yes|down	1	gene-LOC114120054	LOC114120054	uncharacterized LOC114120054, transcript variant X1	2584	41	26	184	15	9	11	0.92	0.58	3.92	0.36	0.22	0.25	1.80667	0.276667	0.174384	-2.51966	0.00161641	0.0176699	yes	down	0	0	0	0	0	0	0	0	0	114120054
gene-LOC114122716	yes|down	1	gene-LOC114122716	LOC114122716	venom dipeptidyl peptidase 4-like, transcript variant X1	2416	284	361.03	224	163	56	48	5.67	7.96	4.91	3.37	1.15	0.95	6.18	1.82333	0.386656	-1.37088	0.00320792	0.0300172	yes	down	XP_027841258.1(venom dipeptidyl peptidase 4-like isoform X1 [Aphis gossypii])	GO:0016021(cellular_component:integral component of membrane); GO:0008236(molecular_function:serine-type peptidase activity)	K01278	DPP4, CD26	map04974(Protein digestion and absorption)	COG1506(L:Replication, recombination and repair)	COG1506(domain) containing)	PF00930.22(DPPIV_N:Dipeptidyl peptidase IV (DPP IV) N-terminal region); PF00326.22(Peptidase_S9:Prolyl oligopeptidase family); PF00561.21(Abhydrolase_1:alpha/beta hydrolase fold); PF01738.19(DLH:Dienelactone hydrolase family)	sp|B1A4F7|VDDP4_VESVU(Venom dipeptidyl peptidase 4 OS=Vespula vulgaris OX=7454 PE=1 SV=1)	114122716
gene-LOC114122303	yes|up	1	gene-LOC114122303	LOC114122303	low choriolytic enzyme-like	1263	51	47	16	169	127	104	2.67	2.43	0.8	9.23	7.05	5.41	1.96667	7.23	4.58367	2.1965	4.2e-07	1.82e-05	yes	up	XP_027840722.1(low choriolytic enzyme-like [Aphis gossypii])	GO:0016021(cellular_component:integral component of membrane); GO:0004222(molecular_function:metalloendopeptidase activity); GO:0008270(molecular_function:zinc ion binding)	K18542	LCE	0	ENOG410ZPX7(S:Function unknown)	ENOG410ZPX7(-)	PF01400.25(Astacin:Astacin (Peptidase family M12A))	sp|Q20191|NAS13_CAEEL(Zinc metalloproteinase nas-13 OS=Caenorhabditis elegans OX=6239 GN=nas-13 PE=2 SV=5)	114122303
gene-LOC114131322	yes|down	1	gene-LOC114131322	LOC114131322	uncharacterized LOC114131322	505	3933	6500	5158	845	589	587	925.31	1484.23	1134.97	204.73	144.23	133.56	1181.5	160.84	0.16544	-2.59562	1.57e-21	5.46e-19	yes	down	XP_027852315.1(uncharacterized protein LOC114131322 [Aphis gossypii])	0	0	0	0	0	0	0	0	114131322
gene-LOC114122099	yes|up	1	gene-LOC114122099	LOC114122099	heat shock protein 70 A1-like	2385	267	681	1025.73	4284	829.55	5193.36	6.49	16.41	23.79	108.88	21.48	125.95	15.5633	85.4367	6.48542	2.6972	5.1e-05	0.00113539	yes	up	XP_027840464.1(heat shock protein 70 A1-like [Aphis gossypii])	GO:0005524(molecular_function:ATP binding)	K03283	HSPA1s	map05162(Measles); map05145(Toxoplasmosis); map04915(Estrogen signaling pathway); map04010(MAPK signaling pathway); map03040(Spliceosome); map05134(Legionellosis); map04213(Longevity regulating pathway - multiple species); map05417(Lipid and atherosclerosis); map04144(Endocytosis); map04612(Antigen processing and presentation); map04141(Protein processing in endoplasmic reticulum); map05020(Prion…	COG0443(O:Posttranslational modification, protein turnover, chaperones)	COG0443(Heat shock protein)	PF00012.21(HSP70:Hsp70 protein); PF06723.14(MreB_Mbl:MreB/Mbl protein)	sp|P41825|HSP71_ANOAL(Heat shock protein 70 A1 OS=Anopheles albimanus OX=7167 GN=HSP70A1 PE=3 SV=1)	114122099
gene-LOC114125749	yes|down	1	gene-LOC114125749	LOC114125749	uncharacterized LOC114125749	737	52	62	33.72	7.32	13	17	5.92	6.93	3.63	0.86	1.56	1.9	5.49333	1.44	0.329769	-1.60047	0.00224343	0.022771	yes	down	0	0	0	0	0	0	0	0	0	114125749
gene-LOC114123159	yes|up	1	gene-LOC114123159	LOC114123159	alpha-N-acetylgalactosaminidase-like, transcript variant X1	1634	1279	953	539	2169	3277	1491	48.75	36	19.59	86.26	132.98	56.77	34.78	92.0033	3.34178	1.74062	1.4e-05	0.000387126	yes	up	XP_027841840.1(alpha-N-acetylgalactosaminidase-like [Aphis gossypii])	GO:0005975(biological_process:carbohydrate metabolic process); GO:0004553(molecular_function:hydrolase activity, hydrolyzing O-glycosyl compounds)	K01189;K01204	GLA;NAGA	map00600(Sphingolipid metabolism); map00603(Glycosphingolipid biosynthesis - globo and isoglobo series); map00561(Glycerolipid metabolism); map04142(Lysosome); map00052(Galactose metabolism)	ENOG410XPF1(G:Carbohydrate transport and metabolism)	ENOG410XPF1(alpha-galactosidase)	PF16499.6(Melibiase_2:Alpha galactosidase A); PF17450.3(Melibiase_2_C:Alpha galactosidase A C-terminal beta sandwich domain); PF02065.19(Melibiase:Melibiase); PF17801.2(Melibiase_C:Alpha galactosidase C-terminal beta sandwich domain)	sp|Q90744|NAGAB_CHICK(Alpha-N-acetylgalactosaminidase OS=Gallus gallus OX=9031 GN=NAGA PE=1 SV=1)	114123159
gene-LOC114133129	yes|down	1	gene-LOC114133129	LOC114133129	tRNA-splicing endonuclease subunit SEN2	1322	222	214	209	89	88	68	10.95	10.44	9.81	4.58	4.61	3.33	10.4	4.17333	0.493548	-1.01874	3.57e-06	0.000120551	yes	down	XP_027854570.1(tRNA-splicing endonuclease subunit SEN2 [Aphis gossypii])	GO:0000213(molecular_function:tRNA-intron endonuclease activity); GO:0016829(molecular_function:lyase activity); GO:0000214(cellular_component:tRNA-intron endonuclease complex); GO:0003676(molecular_function:nucleic acid binding); GO:0006388(biological_process:tRNA splicing, via endonucleolytic cleavage and ligation)	K15322	TSEN2	0	COG1676(J:Translation, ribosomal structure and biogenesis)	COG1676(sites to release the intron. The products are an intron and two tRNA half-molecules bearing 2',3' cyclic phosphate and 5'-OH termini. Recognizes a pseudosymmetric substrate in which 2 bulged loops of 3 bases are separated by a stem of 4 bp (By similarity))	PF01974.18(tRNA_int_endo:tRNA intron endonuclease, catalytic C-terminal domain); PF02778.15(tRNA_int_endo_N:tRNA intron endonuclease, N-terminal domain)	sp|Q5ZIN2|SEN2_CHICK(tRNA-splicing endonuclease subunit Sen2 OS=Gallus gallus OX=9031 GN=TSEN2 PE=2 SV=1)	114133129
gene-LOC114118991	yes|up	1	gene-LOC114118991	LOC114118991	uncharacterized LOC114118991	1206	0	0	0	12	9	2	0	0	0	0.7	0.53	0.11	0	0.446667	53.4182	5.73926	0.000910066	0.0113512	yes	up	XP_027836244.1(uncharacterized protein LOC114118991 [Aphis gossypii])	GO:0005509(molecular_function:calcium ion binding)	0	0	0	ENOG4111MS9(S:Function unknown); ENOG4111DVZ(O:Posttranslational modification, protein turnover, chaperones)	ENOG4111MS9(-); ENOG4111DVZ(Nidogen 2 (Osteonidogen))	PF07645.16(EGF_CA:Calcium-binding EGF domain); PF14670.7(FXa_inhibition:Coagulation Factor Xa inhibitory site); PF12662.8(cEGF:Complement Clr-like EGF-like); PF12947.8(EGF_3:EGF domain)	sp|O88322|NID2_MOUSE(Nidogen-2 OS=Mus musculus OX=10090 GN=Nid2 PE=1 SV=2)	114118991
gene-LOC114129660	yes|up	1	gene-LOC114129660	LOC114129660	thiamine transporter 1-like	615	125.91	48	112	157	174	249.48	19.7	7.34	16.5	25.41	28.54	38.14	14.5133	30.6967	2.67389	1.41894	0.000646137	0.00878319	yes	up	KAE9530531.1(hypothetical protein AGLY_010993 [Aphis glycines])	GO:0090482(molecular_function:vitamin transmembrane transporter activity); GO:0016021(cellular_component:integral component of membrane)	K14610	SLC19A2_3, THTR	map04977(Vitamin digestion and absorption)	ENOG410XT34(P:Inorganic ion transport and metabolism)	ENOG410XT34(reduced folate carrier activity)	PF01770.19(Folate_carrier:Reduced folate carrier)	sp|O60779|S19A2_HUMAN(Thiamine transporter 1 OS=Homo sapiens OX=9606 GN=SLC19A2 PE=1 SV=2)	114129660
gene-LOC114122898	yes|down	1	gene-LOC114122898	LOC114122898	carcinine transporter-like	2182	206	437	653	82	73	85	5.56	11.74	16.84	2.3	2.1	2.29	11.38	2.23	0.235191	-2.08809	5.38e-06	0.000171221	yes	down	XP_027841488.1(carcinine transporter-like [Aphis gossypii])	GO:0022857(molecular_function:transmembrane transporter activity); GO:0016021(cellular_component:integral component of membrane); GO:0008643(biological_process:carbohydrate transport)	K08202	SLC22A4_5, OCTN	map05231(Choline metabolism in cancer)	ENOG410XSRI(S:Function unknown); COG0339(S:Function unknown); COG0477(S:Function unknown)	ENOG410XSRI(Family with sequence similarity 160, member); COG0339(Family with sequence similarity 160, member); COG0477(Family with sequence similarity 160, member)	PF00083.25(Sugar_tr:Sugar (and other) transporter); PF07690.17(MFS_1:Major Facilitator Superfamily)	sp|Q961J5|BALAT_DROME(Beta-alanine transporter OS=Drosophila melanogaster OX=7227 GN=Balat PE=2 SV=1)	114122898
gene-LOC114122954	yes|down	1	gene-LOC114122954	LOC114122954	CD63 antigen-like	903	204	298	336	132	86	86	16.22	23.48	25.73	11.04	7.38	6.96	21.81	8.46	0.461406	-1.11589	0.000501441	0.00714568	yes	down	XP_027841570.1(CD63 antigen-like [Aphis gossypii])	GO:0016021(cellular_component:integral component of membrane)	K06497	CD63, MLA1, TSPAN30	map05205(Proteoglycans in cancer); map04142(Lysosome)	ENOG4111IRY(S:Function unknown)	ENOG4111IRY(alkB, alkylation repair homolog 4 (E. coli))	PF00335.21(Tetraspanin:Tetraspanin family)	sp|Q9XSK2|CD63_BOVIN(CD63 antigen OS=Bos taurus OX=9913 GN=CD63 PE=2 SV=4)	114122954
gene-LOC114125644	yes|down	1	gene-LOC114125644	LOC114125644	angiotensin-converting enzyme-like, transcript variant X1	2209	34	55	44	2	6	9	0.89	1.41	1.11	0.06	0.17	0.24	1.13667	0.156667	0.167045	-2.58169	5.21e-05	0.00115053	yes	down	XP_027845189.1(angiotensin-converting enzyme-like isoform X1 [Aphis gossypii])	GO:0046872(molecular_function:metal ion binding); GO:0016020(cellular_component:membrane); GO:0004180(molecular_function:carboxypeptidase activity); GO:0008237(molecular_function:metallopeptidase activity); GO:0008241(molecular_function:peptidyl-dipeptidase activity)	K01283	ACE, CD143	map05142(Chagas disease); map04614(Renin-angiotensin system); map04924(Renin secretion); map05171(Coronavirus disease - COVID-19); map05415(Diabetic cardiomyopathy); map05410(Hypertrophic cardiomyopathy)	ENOG410XPJ3(G:Carbohydrate transport and metabolism)	ENOG410XPJ3(SMP-30 gluconolaconase LRE domain protein)	PF01401.19(Peptidase_M2:Angiotensin-converting enzyme)	sp|P47820|ACE_RAT(Angiotensin-converting enzyme OS=Rattus norvegicus OX=10116 GN=Ace PE=1 SV=1)	114125644
gene-LOC114124573	yes|up	1	gene-LOC114124573	LOC114124573	beta-1,4-N-acetylgalactosaminyltransferase bre-4-like	1956	54	67	29	109	70	67	1.65	2.03	0.85	3.48	2.28	2.04	1.51	2.6	2.11773	1.08252	0.00573078	0.0463717	yes	up	XP_027843667.1(beta-1,4-N-acetylgalactosaminyltransferase bre-4-like [Aphis gossypii])	GO:0016021(cellular_component:integral component of membrane); GO:0005975(biological_process:carbohydrate metabolic process); GO:0016757(molecular_function:transferase activity, transferring glycosyl groups)	0	0	0	ENOG410ZYYA(U:Intracellular trafficking, secretion, and vesicular transport)	ENOG410ZYYA(N-acetyllactosamine synthase activity)	PF13733.7(Glyco_transf_7N:N-terminal region of glycosyl transferase group 7); PF02709.15(Glyco_transf_7C:N-terminal domain of galactosyltransferase)	sp|A8Y1P7|BRE4_CAEBR(Beta-1,4-N-acetylgalactosaminyltransferase bre-4 OS=Caenorhabditis briggsae OX=6238 GN=bre-4 PE=3 SV=1)	114124573
gene-LOC114124204	yes|up	1	gene-LOC114124204	LOC114124204	uncharacterized LOC114124204	779	0	0	0	73.03	85.86	63.55	0	0	0	5.64	8.16	5.54	0	6.44667	527.761	9.04374	2.89e-13	4.21e-11	yes	up	XP_027843194.1(uncharacterized protein LOC114124203 [Aphis gossypii])	0	K23284	C1QL	0	ENOG410YV20(S:Function unknown)	ENOG410YV20(C1q-like venom protein)	PF00386.22(C1q:C1q domain)	0	114124204
gene-LOC114124203	yes|down	1	gene-LOC114124203	LOC114124203	uncharacterized LOC114124203	860	533	455	650	163.97	114.14	159.45	44.43	36.37	50.3	14.17	10.77	13.21	43.7	12.7167	0.343634	-1.54106	5.8e-10	4.45e-08	yes	down	XP_027843194.1(uncharacterized protein LOC114124203 [Aphis gossypii])	0	K23284	C1QL	0	ENOG410YV20(S:Function unknown)	ENOG410YV20(C1q-like venom protein)	PF00386.22(C1q:C1q domain)	0	114124203
gene-LOC114131115	yes|up	1	gene-LOC114131115	LOC114131115	lipase 3-like	1471	252	189	106	536	426	227	10.86	8.06	4.35	24.13	19.52	9.74	7.75667	17.7967	2.8409	1.50635	0.000160508	0.00292063	yes	up	XP_027852062.1(lipase 3-like [Aphis gossypii])	GO:0016788(molecular_function:hydrolase activity, acting on ester bonds); GO:0016042(biological_process:lipid catabolic process)	K01052	LIPA	map04979(Cholesterol metabolism); map04142(Lysosome); map00100(Steroid biosynthesis)	COG0596(O:Posttranslational modification, protein turnover, chaperones)	COG0596(cereblon)	PF00561.21(Abhydrolase_1:alpha/beta hydrolase fold); PF04083.17(Abhydro_lipase:Partial alpha/beta-hydrolase lipase region)	sp|O46107|LIP1_DROME(Lipase 1 OS=Drosophila melanogaster OX=7227 GN=Lip1 PE=2 SV=2)	114131115
gene-LOC114130990	yes|down	1	gene-LOC114130990	LOC114130990	transmembrane protein 205-like	1511	84.23	198.7	160.42	0	0	0	3.51	8.2	6.37	0	0	0	6.02667	0	0.00159381	-9.29331	4.38e-13	6.22e-11	yes	down	XP_027851907.1(transmembrane protein 205-like [Aphis gossypii])	GO:0016021(cellular_component:integral component of membrane)	0	0	0	ENOG4111HFX(S:Function unknown)	ENOG4111HFX(Transmembrane protein 205)	PF13664.7(DUF4149:Domain of unknown function (DUF4149))	sp|Q6UW68|TM205_HUMAN(Transmembrane protein 205 OS=Homo sapiens OX=9606 GN=TMEM205 PE=1 SV=1)	114130990
gene-LOC114130465	yes|down	1	gene-LOC114130465	LOC114130465	uncharacterized protein DDB_G0283357-like	4955	669	1028	824	59	40	21	12.72	20.93	18.92	0.85	1.35	0.29	17.5233	0.83	0.0606281	-4.04387	9.09e-27	4.35e-24	yes	down	XP_027851246.1(LOW QUALITY PROTEIN: uncharacterized protein DDB_G0283357-like [Aphis gossypii])	0	0	0	0	0	0	0	0	114130465
gene-LOC114129840	yes|down	1	gene-LOC114129840	LOC114129840	uncharacterized LOC114129840	229	21	40	20	4	0	0	12	21.76	10.52	2.36	0	0	14.76	0.786667	0.0616399	-4.01999	0.000224485	0.00383252	yes	down	KAE9531580.1(hypothetical protein AGLY_010786 [Aphis glycines])	0	0	0	0	0	0	0	0	114129840
gene-LOC114122006	yes|down	1	gene-LOC114122006	LOC114122006	kelch-like protein 2, transcript variant X2	2046	340	328	564	94	59	33	9.56	9.23	15.15	2.73	1.76	0.9	11.3133	1.79667	0.191191	-2.38691	1.94e-08	1.14e-06	yes	down	XP_027840343.1(kelch-like protein 2 isoform X1 [Aphis gossypii])	0	K10443	KLHL2_3	0	ENOG4111HKW(S:Function unknown); ENOG410XNX8(S:Function unknown)	ENOG4111HKW(Kelch motif); ENOG410XNX8(kelch-like)	PF01344.26(Kelch_1:Kelch motif); PF07707.16(BACK:BTB And C-terminal Kelch); PF13964.7(Kelch_6:Kelch motif); PF00651.32(BTB:BTB/POZ domain); PF07646.16(Kelch_2:Kelch motif); PF13418.7(Kelch_4:Galactose oxidase, central domain); PF13415.7(Kelch_3:Galactose oxidase, central domain)	sp|Q70JS2|KELC_ANOST(Ring canal kelch homolog OS=Anopheles stephensi OX=30069 GN=kel PE=2 SV=2)	114122006
gene-LOC114120778	yes|up	1	gene-LOC114120778	LOC114120778	BCL-6 corepressor-like protein 1	2022	9575.77	22107.2	2440.36	37379.3	41962.6	72756.4	281.49	644.15	68.43	1148.63	1313.13	2132.52	331.357	1531.43	5.84948	2.54831	0.000106364	0.00208024	yes	up	XP_027838603.1(BCL-6 corepressor-like protein 1 [Aphis gossypii])	0	0	0	0	ENOG4111M7J(S:Function unknown); ENOG410Y20T(S:Function unknown)	ENOG4111M7J(Cuticular protein); ENOG410Y20T(-)	0	0	114120778
gene-LOC114130461	yes|up	1	gene-LOC114130461	LOC114130461	osteocalcin 2-like	1042	0	0	0	123.12	146.09	161.51	0	0	0	8.68	10.48	10.83	0	9.99667	1022.41	9.99775	2.95e-16	6.05e-14	yes	up	XP_027851245.1(osteocalcin 2-like [Aphis gossypii])	0	0	0	0	0	0	0	0	114130461
gene-LOC114127157	yes|down	1	gene-LOC114127157	LOC114127157	lachesin-like	1638	56.18	59	39.78	14	15	20	2.12	2.21	1.43	0.55	0.6	0.75	1.92	0.633333	0.413303	-1.27473	0.00195077	0.0206004	yes	down	XP_027847105.1(lachesin-like [Aphis gossypii])	0	K06775	NEGR1	map04514(Cell adhesion molecules)	ENOG4110N31(S:Function unknown)	ENOG4110N31(IGc2)	PF13927.7(Ig_3:Immunoglobulin domain); PF07679.17(I-set:Immunoglobulin I-set domain); PF00047.26(ig:Immunoglobulin domain); PF13895.7(Ig_2:Immunoglobulin domain); PF07686.18(V-set:Immunoglobulin V-set domain)	sp|Q24372|LACH_DROME(Lachesin OS=Drosophila melanogaster OX=7227 GN=Lac PE=1 SV=2)	114127157
gene-LOC114128643	yes|down	1	gene-LOC114128643	LOC114128643	fanconi-associated nuclease 1-like	3053	446	383	339	156	135	93	8.22	7	5.97	3.01	2.65	1.71	7.06333	2.45667	0.42736	-1.22647	2.41e-07	1.11e-05	yes	down	XP_027849003.1(LOW QUALITY PROTEIN: fanconi-associated nuclease 1-like [Aphis gossypii])	GO:0005634(cellular_component:nucleus); GO:0046872(molecular_function:metal ion binding); GO:0004528(molecular_function:phosphodiesterase I activity); GO:0003676(molecular_function:nucleic acid binding); GO:0036297(biological_process:interstrand cross-link repair)	K15363	FAN1, MTMR15	map03460(Fanconi anemia pathway)	ENOG410XRN3(S:Function unknown)	ENOG410XRN3(FANCD2 FANCI-associated nuclease 1)	PF08774.12(VRR_NUC:VRR-NUC domain)	sp|Q1LWH4|FAN1_DANRE(Fanconi-associated nuclease 1 OS=Danio rerio OX=7955 GN=fan1 PE=2 SV=2)	114128643
gene-LOC114122009	yes|up	1	gene-LOC114122009	LOC114122009	uncharacterized LOC114122009	909	20	23	25	51	52	106	1.64	1.86	1.95	4.36	4.52	8.62	1.81667	5.83333	4.00542	2.00195	1.7e-05	0.000455966	yes	up	XP_027840355.1(uncharacterized protein LOC114122009 [Aphis gossypii])	0	K24166	ARMC6	0	0	0	0	0	114122009
gene-LOC114131301	yes|up	1	gene-LOC114131301	LOC114131301	ataxin-2 homolog	1728	4613	4175	2639	5337	8775	8554	143.51	129.37	80.52	153.01	247.51	229.62	117.8	210.047	2.64082	1.40098	1.23e-05	0.000351161	yes	up	XP_027852284.1(ataxin-2 homolog [Aphis gossypii])	GO:0005576(cellular_component:extracellular region); GO:0008061(molecular_function:chitin binding)	0	0	0	ENOG410ZKXC(S:Function unknown)	ENOG410ZKXC(Chitin binding Peritrophin-A domain)	PF01607.25(CBM_14:Chitin binding Peritrophin-A domain)	sp|O45599|CBD1_CAEEL(Chitin-binding domain protein cbd-1 OS=Caenorhabditis elegans OX=6239 GN=cbd-1 PE=3 SV=2)	114131301
gene-LOC114129462	yes|up	1	gene-LOC114129462	LOC114129462	inhibitor of growth protein 5-like, transcript variant X1	993	2	0	1.43	9.08	7.93	13.05	0.14	0	0.1	0.68	0.61	0.94	0.08	0.743333	13.1578	3.71785	0.00118099	0.0139011	yes	up	XP_027850005.1(inhibitor of growth protein 5-like isoform X1 [Aphis gossypii])	GO:0008285(biological_process:negative regulation of cell proliferation); GO:0035064(molecular_function:methylated histone binding); GO:0005634(cellular_component:nucleus); GO:0043065(biological_process:positive regulation of apoptotic process); GO:0016573(biological_process:histone acetylation); GO:0046872(molecular_function:metal ion binding)	K11346	ING4	0	COG5034(B:Chromatin structure and dynamics)	COG5034(Inhibitor of growth family member)	PF12998.8(ING:Inhibitor of growth proteins N-terminal histone-binding); PF00628.30(PHD:PHD-finger)	sp|Q8WYH8|ING5_HUMAN(Inhibitor of growth protein 5 OS=Homo sapiens OX=9606 GN=ING5 PE=1 SV=1)	114129462
gene-LOC114124809	yes|down	1	gene-LOC114124809	LOC114124809	histone H1A, sperm-like	725	68	77	121	41	28	23	7.95	8.84	13.38	4.98	3.45	2.65	10.0567	3.69333	0.44045	-1.18295	0.00447587	0.0387995	yes	down	XP_027843983.1(histone H1A, sperm-like [Aphis gossypii])	0	K11275	H1_5	0	ENOG41120CT(B:Chromatin structure and dynamics)	ENOG41120CT(histone h1)	PF00538.20(Linker_histone:linker histone H1 and H5 family)	sp|P02255|H1_DROME(Histone H1 OS=Drosophila melanogaster OX=7227 GN=His1 PE=1 SV=1)	114124809
gene-LOC114125131	yes|up	1	gene-LOC114125131	LOC114125131	prisilkin-39-like, transcript variant X1	1015	61616	41034	9294	141600	178482	83145	4610.41	3155.15	693.07	11625.2	14782.6	6398.05	2819.54	10935.3	4.84103	2.27531	8.68e-05	0.00175407	yes	up	XP_027844445.1(prisilkin-39-like isoform X1 [Aphis gossypii])	0	0	0	0	0	0	0	0	114125131
gene-LOC114124805	yes|up	1	gene-LOC114124805	LOC114124805	vitronectin-like, transcript variant X1	1666	136.83	120.76	100.87	219.98	172.05	320.3	5.22	4.69	4.15	8.07	6.44	12.09	4.68667	8.86667	2.59006	1.37299	5.4e-06	0.000171221	yes	up	XP_027843973.1(matrix metalloproteinase-16 isoform X1 [Aphis gossypii])	GO:0004222(molecular_function:metalloendopeptidase activity); GO:0008270(molecular_function:zinc ion binding); GO:0031012(cellular_component:extracellular matrix)	K07763	MMP14	map04928(Parathyroid hormone synthesis, secretion and action); map04912(GnRH signaling pathway); map04668(TNF signaling pathway)	ENOG410XQ5D(O:Posttranslational modification, protein turnover, chaperones)	ENOG410XQ5D(matrix metallopeptidase)	PF00045.20(Hemopexin:Hemopexin)	sp|Q9JHI0|MMP19_MOUSE(Matrix metalloproteinase-19 OS=Mus musculus OX=10090 GN=Mmp19 PE=2 SV=1)	114124805
gene-LOC114124807	yes|down	1	gene-LOC114124807	LOC114124807	uncharacterized LOC114124807	775	99.78	77.28	80.52	0	0	0	5.02	3.95	4.32	0	0	0	4.43	0	0.00279196	-8.4845	5.2e-12	5.68e-10	yes	down	XP_027843975.1(uncharacterized protein LOC114124800 [Aphis gossypii])	0	0	0	0	0	0	0	0	114124807
gene-LOC114124800	yes|down	1	gene-LOC114124800	LOC114124800	uncharacterized LOC114124800	1804	122.22	90.72	92.48	1	0	0	4.11	3.02	2.97	0.04	0	0	3.36667	0.0133333	0.00460655	-7.7621	2.26e-10	1.9e-08	yes	down	XP_027843975.1(uncharacterized protein LOC114124800 [Aphis gossypii])	0	0	0	0	ENOG410ZP20(S:Function unknown)	ENOG410ZP20(-)	PF10551.10(MULE:MULE transposase domain); PF00872.19(Transposase_mut:Transposase, Mutator family)	0	114124800
gene-LOC114132438	yes|up	1	gene-LOC114132438	LOC114132438	uncharacterized LOC114132438	1510	0	0	0	59	41	41	0	0	0	2.57	1.82	1.7	0	2.03	329.46	8.36396	2.53e-11	2.53e-09	yes	up	XP_027853703.1(uncharacterized protein LOC114132438 [Aphis gossypii])	0	0	0	0	ENOG410ZAYX(S:Function unknown)	ENOG410ZAYX(-)	0	0	114132438
gene-LOC114124803	yes|up	1	gene-LOC114124803	LOC114124803	matrix metalloproteinase-16, transcript variant X1	2641	754.17	665.24	503.13	1888.02	1102.95	2132.7	17.08	15.73	11.28	43.61	25.88	47.12	14.6967	38.87	3.46161	1.79144	1.3e-10	1.19e-08	yes	up	XP_027843973.1(matrix metalloproteinase-16 isoform X1 [Aphis gossypii])	GO:0004222(molecular_function:metalloendopeptidase activity); GO:0008270(molecular_function:zinc ion binding); GO:0031012(cellular_component:extracellular matrix)	K07763	MMP14	map04928(Parathyroid hormone synthesis, secretion and action); map04912(GnRH signaling pathway); map04668(TNF signaling pathway)	ENOG410XQ5D(O:Posttranslational modification, protein turnover, chaperones)	ENOG410XQ5D(matrix metallopeptidase)	PF00413.25(Peptidase_M10:Matrixin); PF00045.20(Hemopexin:Hemopexin); PF01471.19(PG_binding_1:Putative peptidoglycan binding domain)	sp|Q5RES1|MMP14_PONAB(Matrix metalloproteinase-14 OS=Pongo abelii OX=9601 GN=MMP14 PE=2 SV=1)	114124803
gene-LOC114127901	yes|up	1	gene-LOC114127901	LOC114127901	nuclear control of ATPase protein 2-like	1639	1	16	6	76	53	117	0.04	0.6	0.22	3	2.13	4.4	0.286667	3.17667	13.6123	3.76683	4.67e-07	2e-05	yes	up	XP_027848061.1(nuclear control of ATPase protein 2-like [Aphis gossypii])	0	0	0	0	0	0	0	0	114127901
gene-LOC114122431	yes|up	1	gene-LOC114122431	LOC114122431	tetra-peptide repeat homeobox protein 1-like	1271	10820	19568.8	8068	26153	30431.8	37992	561.47	1004.09	398.43	1416.01	1676.48	1958.64	654.663	1683.71	3.21178	1.68338	7.41e-06	0.000227867	yes	up	KAE9527253.1(hypothetical protein AGLY_012951 [Aphis glycines])	0	0	0	0	ENOG4111M7J(L:Replication, recombination and repair)	ENOG4111M7J(IstB domain protein ATP-binding protein)	0	0	114122431
gene-LOC114124336	yes|down	1	gene-LOC114124336	LOC114124336	probable cytochrome P450 6a13	2024	4714	6095	6940	566	260	252	138.41	177.39	194.37	17.37	8.13	7.38	170.057	10.96	0.0764165	-3.70997	8.26e-27	4.16e-24	yes	down	XP_027843364.1(probable cytochrome P450 6a13 [Aphis gossypii])	GO:0005506(molecular_function:iron ion binding); GO:0016705(molecular_function:oxidoreductase activity, acting on paired donors, with incorporation or reduction of molecular oxygen); GO:0016021(cellular_component:integral component of membrane); GO:0004497(molecular_function:monooxygenase activity); GO:0020037(molecular_function:heme binding)	K14999	CYP6	0	COG2124(Q:Secondary metabolites biosynthesis, transport and catabolism)	COG2124(Cytochrome p450)	PF00067.23(p450:Cytochrome P450)	sp|Q9V4U9|C6A13_DROME(Probable cytochrome P450 6a13 OS=Drosophila melanogaster OX=7227 GN=Cyp6a13 PE=2 SV=1)	114124336
gene-LOC114130783	yes|up	1	gene-LOC114130783	LOC114130783	uncharacterized LOC114130783	2342	3	3	1	458	288	488	0.07	0.07	0.02	11.88	7.61	12.08	0.0533333	10.5233	228.328	7.83497	9.46e-37	1.09e-33	yes	up	XP_027851643.1(uncharacterized protein LOC114130783 [Aphis gossypii])	0	0	0	0	0	0	0	0	114130783
gene-LOC114128502	yes|up	1	gene-LOC114128502	LOC114128502	phosphopantothenoylcysteine decarboxylase-like	619	0	0	0	105.48	92.95	67.8	0	0	0	16.87	15.07	10.24	0	14.06	624.445	9.28643	5.01e-14	8e-12	yes	up	XP_027848822.1(phosphopantothenoylcysteine decarboxylase-like [Aphis gossypii])	GO:0003824(molecular_function:catalytic activity)	K01598	PPCDC, coaC	map00770(Pantothenate and CoA biosynthesis); map01240(Biosynthesis of cofactors)	COG0452(H:Coenzyme transport and metabolism)	COG0452(Phosphopantothenoylcysteine decarboxylase)	PF02441.20(Flavoprotein:Flavoprotein)	sp|Q96CD2|COAC_HUMAN(Phosphopantothenoylcysteine decarboxylase OS=Homo sapiens OX=9606 GN=PPCDC PE=1 SV=2)	114128502
gene-LOC114128169	yes|down	1	gene-LOC114128169	LOC114128169	EF-hand domain-containing family member C2-like	2469	423.66	307.83	369.58	67.97	71.76	66.49	10.28	7.41	8.56	1.73	1.86	1.61	8.75	1.73333	0.24419	-2.03392	8.99e-20	2.87e-17	yes	down	XP_027848421.1(EF-hand domain-containing family member C2-like [Aphis gossypii])	0	0	0	0	ENOG410XQCQ(S:Function unknown)	ENOG410XQCQ(EF-hand domain (C-terminal) containing)	PF06565.13(DUF1126:DUF1126 PH-like domain)	sp|Q5JST6|EFHC2_HUMAN(EF-hand domain-containing family member C2 OS=Homo sapiens OX=9606 GN=EFHC2 PE=1 SV=2)	114128169
gene-LOC114128168	yes|down	1	gene-LOC114128168	LOC114128168	acetylcholinesterase-like, transcript variant X1	2395	1585	1061	717	516	365	349	38.35	25.46	16.56	13.06	9.41	8.43	26.79	10.3	0.47869	-1.06284	0.000292857	0.00472351	yes	down	XP_027848418.1(acetylcholinesterase-like isoform X1 [Aphis gossypii])	GO:0004104(molecular_function:cholinesterase activity)	K01049	ACHE	map00564(Glycerophospholipid metabolism); map04725(Cholinergic synapse)	COG2272(L:Replication, recombination and repair)	COG2272(helicase)	PF00135.29(COesterase:Carboxylesterase family); PF07859.14(Abhydrolase_3:alpha/beta hydrolase fold)	sp|Q86GC8|ACES_CULPI(Acetylcholinesterase OS=Culex pipiens OX=7175 GN=ACHE1 PE=2 SV=2)	114128168
gene-LOC114122357	yes|up	1	gene-LOC114122357	LOC114122357	cyclin-dependent kinase inhibitor 1C-like	1444	10547	8286	8016	23298	59052	44811	465.31	361.75	336.83	1106.44	2854.33	2027.37	387.963	1996.05	6.34612	2.66587	3.3e-12	3.91e-10	yes	up	XP_027840798.1(cyclin-dependent kinase inhibitor 1C-like [Aphis gossypii])	0	0	0	0	0	0	0	0	114122357
gene-LOC114127702	yes|down	1	gene-LOC114127702	LOC114127702	uncharacterized LOC114127702	1836	127	139	113	20	11	23	4.18	4.54	3.55	0.69	0.39	0.75	4.09	0.61	0.18423	-2.44042	4.64e-12	5.34e-10	yes	down	XP_027847830.1(LOW QUALITY PROTEIN: uncharacterized protein LOC114127702, partial [Aphis gossypii])	0	0	0	0	COG0457(S:Function unknown); ENOG410Y2HQ(S:Function unknown); ENOG410Y2PF(S:Function unknown)	COG0457(repeat-containing protein); ENOG410Y2HQ(-); ENOG410Y2PF(-)	PF12259.9(Baculo_F:Baculovirus F protein)	sp|Q9YMJ7|ENV_NPVLD(Envelope fusion protein OS=Lymantria dispar multicapsid nuclear polyhedrosis virus OX=10449 GN=LdOrf-130 PE=3 SV=1)	114127702
gene-LOC114127703	yes|up	1	gene-LOC114127703	LOC114127703	UDP-glucuronosyltransferase 2B13-like	1758	285	446	413	629	889	697	9.76	15.1	13.46	22.45	31.79	23.71	12.7733	25.9833	2.51833	1.33247	1.73e-05	0.000462427	yes	up	XP_027847828.1(UDP-glucuronosyltransferase 2B13-like [Aphis gossypii])	GO:0015020(molecular_function:glucuronosyltransferase activity); GO:0016021(cellular_component:integral component of membrane)	K00699	UGT	map05207(Chemical carcinogenesis - receptor activation); map05204(Chemical carcinogenesis - DNA adducts); map00983(Drug metabolism - other enzymes); map00982(Drug metabolism - cytochrome P450); map01240(Biosynthesis of cofactors); map04976(Bile secretion); map00040(Pentose and glucuronate interconversions); map00980(Metabolism of xenobiotics by cytochrome P450); map00860(Porphyrin and chlorophyll…	COG1819(S:Function unknown)	COG1819(Transferase)	PF00201.19(UDPGT:UDP-glucoronosyl and UDP-glucosyl transferase); PF04101.17(Glyco_tran_28_C:Glycosyltransferase family 28 C-terminal domain)	sp|P08541|UD2B2_RAT(UDP-glucuronosyltransferase 2B2 OS=Rattus norvegicus OX=10116 GN=Ugt2b PE=1 SV=1)	114127703
gene-LOC114124873	yes|down	1	gene-LOC114124873	LOC114124873	serum response factor homolog	2132	42.55	21.52	105.99	0	0	0	1.18	0.59	2.79	0	0	0	1.52	0	0.00412501	-7.92139	2.98e-08	1.69e-06	yes	down	XP_027844121.1(serum response factor homolog [Aphis gossypii])	GO:0000987(molecular_function:core promoter proximal region sequence-specific DNA binding); GO:0046983(molecular_function:protein dimerization activity); GO:0045944(biological_process:positive regulation of transcription from RNA polymerase II promoter); GO:0005634(cellular_component:nucleus); GO:0000981(molecular_function:RNA polymerase II transcription factor activity, sequence-specific DNA bin…	K04378	SRF	map05166(Human T-cell leukemia virus 1 infection); map05203(Viral carcinogenesis); map04010(MAPK signaling pathway); map04022(cGMP-PKG signaling pathway)	COG5068(K:Transcription)	COG5068(Transcription factor)	PF00319.19(SRF-TF:SRF-type transcription factor (DNA-binding and dimerisation domain))	sp|Q24535|SRF_DROME(Serum response factor homolog OS=Drosophila melanogaster OX=7227 GN=bs PE=1 SV=2)	114124873
gene-LOC114124970	yes|up	1	gene-LOC114124970	LOC114124970	probable medium-chain specific acyl-CoA dehydrogenase, mitochondrial	1278	1.5	21.47	25.13	61.16	100.63	93.1	0.08	1.09	1.23	3.29	5.5	4.77	0.8	4.52	6.80271	2.76611	0.000172486	0.0030873	yes	up	XP_027844234.1(probable medium-chain specific acyl-CoA dehydrogenase, mitochondrial [Aphis gossypii])	GO:0003995(molecular_function:acyl-CoA dehydrogenase activity); GO:0050660(molecular_function:flavin adenine dinucleotide binding)	K00249	ACADM, acd	map00280(Valine, leucine and isoleucine degradation); map03320(PPAR signaling pathway); map00071(Fatty acid degradation)	COG1960(I:Lipid transport and metabolism)	COG1960(acyl-CoA dehydrogenase)	PF00441.25(Acyl-CoA_dh_1:Acyl-CoA dehydrogenase, C-terminal domain); PF02770.20(Acyl-CoA_dh_M:Acyl-CoA dehydrogenase, middle domain); PF02771.17(Acyl-CoA_dh_N:Acyl-CoA dehydrogenase, N-terminal domain); PF08028.12(Acyl-CoA_dh_2:Acyl-CoA dehydrogenase, C-terminal domain); PF11794.9(HpaB_N:4-hydroxyphenylacetate 3-hydroxylase N terminal)	sp|Q9VSA3|ACADM_DROME(Probable medium-chain specific acyl-CoA dehydrogenase, mitochondrial OS=Drosophila melanogaster OX=7227 GN=CG12262 PE=2 SV=1)	114124970
gene-LOC114129842	yes|down	1	gene-LOC114129842	LOC114129842	protein 5NUC-like	2586	1142	159	1431	230	132	245	25.33	3.5	30.29	5.34	3.12	5.42	19.7067	4.62667	0.286867	-1.80155	0.00620638	0.0491891	yes	down	XP_027850492.1(protein 5NUC-like [Aphis gossypii])	GO:0009166(biological_process:nucleotide catabolic process); GO:0046872(molecular_function:metal ion binding); GO:0016788(molecular_function:hydrolase activity, acting on ester bonds); GO:0000166(molecular_function:nucleotide binding)	K19970	NT5E, CD73	map00240(Pyrimidine metabolism); map00230(Purine metabolism); map00760(Nicotinate and nicotinamide metabolism)	COG0737(F:Nucleotide transport and metabolism)	COG0737(5-Nucleotidase)	PF02872.19(5_nucleotid_C:5'-nucleotidase, C-terminal domain); PF00149.29(Metallophos:Calcineurin-like phosphoesterase)	sp|Q9XZ43|5NTD_LUTLO(Protein 5NUC OS=Lutzomyia longipalpis OX=7200 GN=5NUC PE=1 SV=1)	114129842
gene-LOC114131116	yes|up	1	gene-LOC114131116	LOC114131116	protein FAM151B, transcript variant X1	1214	372	475	429	930	690	468	31.53	43.56	40	60.86	44.71	28.64	38.3633	44.7367	2.09462	1.06669	0.000182624	0.00323602	yes	up	XP_027852063.1(protein FAM151B [Aphis gossypii])	GO:0016021(cellular_component:integral component of membrane)	0	0	0	ENOG410ZS9E(S:Function unknown)	ENOG410ZS9E(Family with sequence similarity 151, member)	PF10223.10(DUF2181:Uncharacterized conserved protein (DUF2181))	sp|Q6UXP7|F151B_HUMAN(Protein FAM151B OS=Homo sapiens OX=9606 GN=FAM151B PE=1 SV=2)	114131116
gene-LOC114128010	yes|down	1	gene-LOC114128010	LOC114128010	glycoprotein 3-alpha-L-fucosyltransferase A-like	2111	464.38	550.73	446	57	37	47	12.85	14.98	11.75	1.64	1.07	1.3	13.1933	1.33667	0.124414	-3.00678	4.4e-35	3.89e-32	yes	down	XP_027848217.1(glycoprotein 3-alpha-L-fucosyltransferase A-like [Aphis gossypii])	GO:0032580(cellular_component:Golgi cisterna membrane); GO:0016021(cellular_component:integral component of membrane); GO:0006486(biological_process:protein glycosylation); GO:0008417(molecular_function:fucosyltransferase activity)	K00753	E2.4.1.214	map00513(Various types of N-glycan biosynthesis)	ENOG410ZIMX(S:Function unknown)	ENOG410ZIMX((Alpha (1,3) fucosyltransferase)	PF00852.20(Glyco_transf_10:Glycosyltransferase family 10 (fucosyltransferase) C-term); PF17039.6(Glyco_tran_10_N:Fucosyltransferase, N-terminal)	sp|Q9VUL9|FUCTA_DROME(Glycoprotein 3-alpha-L-fucosyltransferase A OS=Drosophila melanogaster OX=7227 GN=FucTA PE=2 SV=2)	114128010
gene-LOC114124506	yes|up	1	gene-LOC114124506	LOC114124506	0	390	25.01	22	7	74	122	67.13	2.89	2.5	0.77	8.88	14.86	7.63	2.05333	10.4567	6.50216	2.70092	3.15e-07	1.4e-05	yes	up	XP_022173718.1(valacyclovir hydrolase-like [Myzus persicae])	0	K18399	BPHL	0	ENOG410YNJD(S:Function unknown); ENOG410ZPX7(O:Posttranslational modification, protein turnover, chaperones); ENOG410ZSVP(S:Function unknown); ENOG410ZWHN(S:Function unknown)	ENOG410YNJD(Alpha beta hydrolase fold protein); ENOG410ZPX7(Meprin A); ENOG410ZSVP(alpha/beta hydrolase fold); ENOG410ZWHN(alpha/beta hydrolase fold)	0	sp|Q86WA6|BPHL_HUMAN(Valacyclovir hydrolase OS=Homo sapiens OX=9606 GN=BPHL PE=1 SV=1)	114124506
gene-LOC114123923	yes|down	1	gene-LOC114123923	LOC114123923	acetylcholine receptor subunit alpha-like 1	1783	1928	2070	1421	1015	504	376	65.75	69.9	46.2	36.11	18.23	12.71	60.6167	22.35	0.445428	-1.16674	0.000980369	0.0120839	yes	down	XP_027842863.1(acetylcholine receptor subunit alpha-like 1 [Aphis gossypii])	GO:0005230(molecular_function:extracellular ligand-gated ion channel activity); GO:0016021(cellular_component:integral component of membrane); GO:0004888(molecular_function:transmembrane signaling receptor activity)	K05312	CHRNN	0	ENOG410XQGR(U:Intracellular trafficking, secretion, and vesicular transport)	ENOG410XQGR(cholinergic receptor, nicotinic)	PF02931.24(Neur_chan_LBD:Neurotransmitter-gated ion-channel ligand binding domain); PF02932.17(Neur_chan_memb:Neurotransmitter-gated ion-channel transmembrane region)	sp|P09478|ACH1_DROME(Acetylcholine receptor subunit alpha-like 1 OS=Drosophila melanogaster OX=7227 GN=nAChRalpha1 PE=2 SV=2)	114123923
gene-LOC114128187	yes|down	1	gene-LOC114128187	LOC114128187	maltase A3-like	1093	278.36	149	87.19	9.07	1	6.63	13.11	6.34	3.59	0.53	0.06	0.37	7.68	0.32	0.0431938	-4.53303	2.17e-12	2.72e-10	yes	down	KAE9521750.1(hypothetical protein AGLY_017850 [Aphis glycines])	GO:0003824(molecular_function:catalytic activity); GO:0005975(biological_process:carbohydrate metabolic process)	0	0	0	COG0366(G:Carbohydrate transport and metabolism)	COG0366(alpha amylase, catalytic)	PF00128.25(Alpha-amylase:Alpha amylase, catalytic domain)	sp|P07190|MAL1_DROME(Maltase A1 OS=Drosophila melanogaster OX=7227 GN=Mal-A1 PE=2 SV=2)	114128187
gene-LOC114130767	yes|up	1	gene-LOC114130767	LOC114130767	uncharacterized LOC114130767	2562	118	110	110	236	248	277	1.91	1.77	2.57	10.46	6.34	6.63	2.08333	7.81	2.9391	1.55537	1.47e-13	2.24e-11	yes	up	XP_027851617.1(uncharacterized protein LOC114130767 [Aphis gossypii])	GO:0005643(cellular_component:nuclear pore); GO:0016973(biological_process:poly(A)+ mRNA export from nucleus)	K18723	GLE1	map03013(Nucleocytoplasmic transport); map03015(mRNA surveillance pathway); map05014(Amyotrophic lateral sclerosis)	ENOG410XT57(S:Function unknown); COG1028(S:Function unknown)	ENOG410XT57(GLE1 RNA export mediator homolog (yeast)); COG1028(GLE1 RNA export mediator homolog (yeast))	PF07817.14(GLE1:GLE1-like protein); PF00106.26(adh_short:short chain dehydrogenase); PF13561.7(adh_short_C2:Enoyl-(Acyl carrier protein) reductase); PF08659.11(KR:KR domain)	sp|Q6PAY8|HSDL2_XENLA(Hydroxysteroid dehydrogenase-like protein 2 OS=Xenopus laevis OX=8355 GN=hsdl2 PE=2 SV=1)	114130767
gene-LOC114128189	yes|down	1	gene-LOC114128189	LOC114128189	0	897	13.9	9	18.01	1	0	0	1.56	0.99	1.6	0.12	0	0	1.38333	0.04	0.0339805	-4.87915	0.00066597	0.00893658	yes	down	XP_027848440.1(maltase 2-like [Aphis gossypii])	GO:0003824(molecular_function:catalytic activity); GO:0005975(biological_process:carbohydrate metabolic process)	0	0	0	COG0366(G:Carbohydrate transport and metabolism)	COG0366(alpha amylase, catalytic)	0	sp|O16099|MAL2_DROVI(Maltase 2 OS=Drosophila virilis OX=7244 GN=Mal-B2 PE=3 SV=2)	114128189
gene-LOC114123840	yes|down	1	gene-LOC114123840	LOC114123840	uncharacterized LOC114123840, transcript variant X1	2455	165	95	89	1	0	0	5.07	2.94	2.59	0.03	0	0	3.53333	0.01	0.00405905	-7.94464	1.7e-10	1.49e-08	yes	down	0	0	0	0	0	0	0	0	0	114123840
gene-LOC114129202	yes|up	1	gene-LOC114129202	LOC114129202	omega-amidase NIT2-like	1082	0	0	0	280.05	205.95	794.91	0	0	0	18.76	14.03	50.65	0	27.8133	3036.19	11.568	2.05e-18	5.62e-16	yes	up	XP_027849657.1(omega-amidase NIT2-like [Aphis gossypii])	GO:0006807(biological_process:nitrogen compound metabolic process)	K13566	NIT2, yafV	map00250(Alanine, aspartate and glutamate metabolism)	COG0388(S:Function unknown)	COG0388(nitrilase cyanide hydratase and apolipoprotein n-acyltransferase)	PF00795.23(CN_hydrolase:Carbon-nitrogen hydrolase)	sp|Q497B0|NIT2_RAT(Omega-amidase NIT2 OS=Rattus norvegicus OX=10116 GN=Nit2 PE=1 SV=1)	114129202
gene-LOC114129567	yes|up	1	gene-LOC114129567	LOC114129567	glutamate-gated chloride channel-like, transcript variant X1	802	1.67	7	0	51.01	14.46	36.39	0.17	0.9	0	8.87	2.59	6.07	0.356667	5.84333	14.2061	3.82844	4.57e-05	0.00103973	yes	up	XP_027850152.1(uncharacterized protein LOC114129567 isoform X1 [Aphis gossypii])	0	K05273	GRGLCN	0	ENOG410XPWH(S:Function unknown)	ENOG410XPWH(-)	0	sp|Q94900|GLUCL_DROME(Glutamate-gated chloride channel OS=Drosophila melanogaster OX=7227 GN=GluClalpha PE=1 SV=2)	114129567
gene-LOC114129208	yes|up	1	gene-LOC114129208	LOC114129208	uncharacterized LOC114129208	1165	0	0	0	15	25	13	0	0	0	0.91	1.54	0.75	0	1.06667	126.416	6.98203	5.84e-07	2.44e-05	yes	up	XP_027849662.1(uncharacterized protein LOC114129208 [Aphis gossypii])	0	K08471	GR	0	ENOG410YSCH(S:Function unknown)	ENOG410YSCH(Reverse transcriptase (RNA-dependent DNA polymerase))	PF08395.13(7tm_7:7tm Chemosensory receptor)	0	114129208
gene-LOC114129562	yes|up	1	gene-LOC114129562	LOC114129562	UPF0545 protein C22orf39 homolog	615	96	39	51	161	101	97	15.02	5.97	7.51	26.06	16.57	14.83	9.5	19.1533	2.5191	1.33291	0.000544802	0.00766858	yes	up	KAF0759549.1(UPF0545 protein [Aphis craccivora])	0	0	0	0	ENOG4111T84(S:Function unknown)	ENOG4111T84(chromosome 22 open reading frame 39)	PF11326.9(DUF3128:Protein of unknown function (DUF3128))	0	114129562
gene-LOC114121628	yes|up	1	gene-LOC114121628	LOC114121628	uncharacterized LOC114121628	371	0	0	0	114	110	108	0	0	0	64.36	62.22	56.01	0	60.8633	782.616	9.61216	2.43e-15	4.73e-13	yes	up	0	0	0	0	0	0	0	0	0	114121628
gene-LOC114131161	yes|down	1	gene-LOC114131161	LOC114131161	sterile alpha and TIR motif-containing protein 1-like, transcript variant X1	1430	315.79	270.3	385.28	67.87	65.22	153.12	14.24	11.96	16.85	3.24	3.26	6.76	14.35	4.42	0.383953	-1.381	0.000835792	0.0106677	yes	down	XP_027852119.1(sterile alpha and TIR motif-containing protein 1-like isoform X1 [Aphis gossypii])	GO:0035591(molecular_function:signaling adaptor activity); GO:0048678(biological_process:response to axon injury); GO:0034128(biological_process:negative regulation of MyD88-independent toll-like receptor signaling pathway); GO:0007165(biological_process:signal transduction)	0	0	0	ENOG410XQ4A(S:Function unknown)	ENOG410XQ4A(Sterile alpha and TIR motif containing 1)	PF07647.18(SAM_2:SAM domain (Sterile alpha motif)); PF00536.31(SAM_1:SAM domain (Sterile alpha motif)); PF13676.7(TIR_2:TIR domain); PF01582.21(TIR:TIR domain)	sp|Q6IDD9|SARM1_DROME(NAD(+) hydrolase sarm1 OS=Drosophila melanogaster OX=7227 GN=Ect4 PE=1 SV=1)	114131161
gene-LOC114119834	yes|up	1	gene-LOC114119834	LOC114119834	uncharacterized LOC114119834	5706	0	0	7.49	59.86	35.26	25.03	0	0	0.07	0.59	0.35	0.24	0.0233333	0.393333	21.234	4.4083	4.05e-05	0.000942163	yes	up	XP_027837351.1(uncharacterized protein LOC114119834 [Aphis gossypii])	0	0	0	0	COG2801(L:Replication, recombination and repair); ENOG410Y7Q4(S:Function unknown); ENOG410YHBQ(S:Function unknown); ENOG410YP2D(S:Function unknown); ENOG4112AZ8(S:Function unknown); ENOG4111PX2(S:Function unknown)	COG2801(Retrotransposon protein); ENOG410Y7Q4(-); ENOG410YHBQ(-); ENOG410YP2D(Integrase core domain protein); ENOG4112AZ8(-); ENOG4111PX2(-)	PF05380.14(Peptidase_A17:Pao retrotransposon peptidase); PF18701.2(DUF5641:Family of unknown function (DUF5641)); PF03564.16(DUF1759:Protein of unknown function (DUF1759)); PF05585.13(DUF1758:Putative peptidase (DUF1758)); PF17921.2(Integrase_H2C2:Integrase zinc binding domain); PF00665.27(rve:Integrase core domain); PF00078.28(RVT_1:Reverse transcriptase (RNA-dependent DNA polymerase))	0	114119834
gene-LOC114119943	yes|up	1	gene-LOC114119943	LOC114119943	protein spaetzle 4	1841	849	356	176	843	1183	741	26.76	11.22	5.27	27.71	39.74	23.01	14.4167	30.1533	2.71764	1.44236	0.00451153	0.0390389	yes	up	XP_027837491.1(protein spaetzle 4 [Aphis gossypii])	0	0	0	0	ENOG4111MKQ(S:Function unknown)	ENOG4111MKQ(-)	PF16077.6(Spaetzle:Spaetzle)	sp|Q9VKG9|SPZ4_DROME(Protein spaetzle 4 OS=Drosophila melanogaster OX=7227 GN=spz4 PE=2 SV=2)	114119943
gene-LOC114121622	yes|down	1	gene-LOC114121622	LOC114121622	cytoplasmic dynein 2 heavy chain 1	12832	69	38	38	11	11	13	0.28	0.15	0.15	0.05	0.05	0.05	0.193333	0.05	0.318077	-1.65255	0.000411227	0.00618993	yes	down	XP_027839832.1(LOW QUALITY PROTEIN: cytoplasmic dynein 2 heavy chain 1 [Aphis gossypii])	GO:0030286(cellular_component:dynein complex); GO:0016887(molecular_function:ATPase activity); GO:0007018(biological_process:microtubule-based movement); GO:0003777(molecular_function:microtubule motor activity); GO:0005524(molecular_function:ATP binding)	0	0	0	COG5245(J:Translation, ribosomal structure and biogenesis)	COG5245(catalyzes the formation of 5-methyl-uridine at position)	PF12774.8(AAA_6:Hydrolytic ATP binding site of dynein motor region); PF08393.14(DHC_N2:Dynein heavy chain, N-terminal region 2); PF12781.8(AAA_9:ATP-binding dynein motor region); PF12780.8(AAA_8:P-loop containing dynein motor region D4); PF18198.2(AAA_lid_11:Dynein heavy chain AAA lid domain); PF18199.2(Dynein_C:Dynein heavy chain C-terminal domain); PF12777.8(MT:Microtubule-binding stalk of dyne…	sp|Q9JJ79|DYHC2_RAT(Cytoplasmic dynein 2 heavy chain 1 OS=Rattus norvegicus OX=10116 GN=Dync2h1 PE=1 SV=1)	114121622
gene-LOC114132269	yes|down	1	gene-LOC114132269	LOC114132269	ABC transporter G family member 23-like	2046	7	27	14	2	2	0	0.2	0.78	0.39	0.06	0.06	0	0.456667	0.04	0.105995	-3.23793	0.00450666	0.039026	yes	down	XP_027853479.1(ABC transporter G family member 23-like [Aphis gossypii])	GO:0016021(cellular_component:integral component of membrane); GO:0016887(molecular_function:ATPase activity); GO:0005524(molecular_function:ATP binding)	0	0	0	COG1131(V:Defense mechanisms)	COG1131((ABC) transporter)	PF00005.28(ABC_tran:ABC transporter); PF12698.8(ABC2_membrane_3:ABC-2 family transporter protein); PF01061.25(ABC2_membrane:ABC-2 type transporter); PF13304.7(AAA_21:AAA domain, putative AbiEii toxin, Type IV TA system)	sp|Q55EH8|ABCGN_DICDI(ABC transporter G family member 23 OS=Dictyostelium discoideum OX=44689 GN=abcG23 PE=3 SV=2)	114132269
gene-LOC114120898	yes|down	1	gene-LOC114120898	LOC114120898	aprataxin	967	369	366	319	90	90	162	27.71	27.1	22.75	7.02	7.15	12.01	25.8533	8.72667	0.424566	-1.23594	7.94e-05	0.00164465	yes	down	XP_027838783.1(aprataxin [Aphis gossypii])	GO:0033699(molecular_function:DNA 5'-adenosine monophosphate hydrolase activity); GO:0006302(biological_process:double-strand break repair); GO:0000012(biological_process:single strand break repair); GO:0005634(cellular_component:nucleus); GO:0030983(molecular_function:mismatched DNA binding); GO:0003824(molecular_function:catalytic activity); GO:0003725(molecular_function:double-stranded RNA bin…	K10863	APTX	0	ENOG41102F4(S:Function unknown)	ENOG41102F4(DNA-binding protein involved in single-strand DNA break repair, double-strand DNA break repair and base excision repair. Resolves abortive DNA ligation intermediates formed either at base excision sites, or when DNA ligases attempt to repair non- ligatable breaks induced by reactive oxygen species. Catalyzes the release of adenylate groups covalently linked to 5'-phosphate termini, re…	PF11969.9(DcpS_C:Scavenger mRNA decapping enzyme C-term binding); PF01230.24(HIT:HIT domain); PF16278.6(zf-C2HE:C2HE / C2H2 / C2HC zinc-binding finger)	sp|Q8MSG8|APTX_DROME(Aprataxin-like protein OS=Drosophila melanogaster OX=7227 GN=CG5316 PE=2 SV=2)	114120898
gene-LOC114127971	yes|up	1	gene-LOC114127971	LOC114127971	multiple inositol polyphosphate phosphatase 1-like	1440	196	332	471	758	528	521	8.46	14.06	19.07	33.8	23.76	22.17	13.8633	26.5767	2.28776	1.19393	0.00151341	0.0167349	yes	up	XP_027848163.1(multiple inositol polyphosphate phosphatase 1-like [Aphis gossypii])	GO:0016791(molecular_function:phosphatase activity)	K03103	MINPP1	map00010(Glycolysis / Gluconeogenesis); map00562(Inositol phosphate metabolism)	ENOG4111FS8(S:Function unknown)	ENOG4111FS8(PHOsphatase)	PF00328.23(His_Phos_2:Histidine phosphatase superfamily (branch 2))	sp|Q9VV72|MINP1_DROME(Multiple inositol polyphosphate phosphatase 1 OS=Drosophila melanogaster OX=7227 GN=Mipp1 PE=1 SV=2)	114127971
gene-LOC114127879	yes|down	1	gene-LOC114127879	LOC114127879	legumain-like, transcript variant X1	1642	349	638	601	233	162	188	12.82	23.36	21.69	9.42	6.26	7.3	19.29	7.66	0.46732	-1.09752	0.000676943	0.00905214	yes	down	XP_027848029.1(legumain-like isoform X1 [Aphis gossypii])	GO:0008233(molecular_function:peptidase activity); GO:0016021(cellular_component:integral component of membrane)	K01369	LGMN	map04612(Antigen processing and presentation); map04142(Lysosome)	COG5206(O:Posttranslational modification, protein turnover, chaperones)	COG5206(phosphatidylinositol glycan anchor biosynthesis, class K)	PF01650.19(Peptidase_C13:Peptidase C13 family); PF00656.23(Peptidase_C14:Caspase domain)	sp|Q95M12|LGMN_BOVIN(Legumain OS=Bos taurus OX=9913 GN=LGMN PE=1 SV=1)	114127879
gene-LOC114120389	yes|down	1	gene-LOC114120389	LOC114120389	uncharacterized LOC114120389	555	110	94	20	0	0	0	21.08	17.55	3.6	0	0	0	14.0767	0	0.00326935	-8.25678	4.03e-09	2.71e-07	yes	down	XP_027838075.1(uncharacterized protein LOC114120389, partial [Aphis gossypii])	0	0	0	0	ENOG4112BST(S:Function unknown); ENOG4112A9I(S:Function unknown)	ENOG4112BST(MULE transposase domain); ENOG4112A9I(-)	0	0	114120389
gene-LOC114120388	yes|up	1	gene-LOC114120388	LOC114120388	uncharacterized LOC114120388	345	19	17	37	225	248	179	36.78	30.54	64.84	467.63	513.85	328.73	44.0533	436.737	11.5443	3.5291	1.43e-19	4.44e-17	yes	up	XP_027838073.1(uncharacterized protein LOC114120388 [Aphis gossypii])	0	0	0	0	0	0	0	0	114120388
gene-LOC114122130	yes|down	1	gene-LOC114122130	LOC114122130	adhesive plaque matrix protein-like	742	63	278	266	38	24	60	7.09	30.74	28.32	4.44	2.85	6.65	22.05	4.64667	0.253906	-1.97764	0.00163403	0.0177612	yes	down	XP_027840501.1(adhesive plaque matrix protein-like [Aphis gossypii])	0	0	0	0	ENOG410ZQR0(S:Function unknown)	ENOG410ZQR0(-)	0	0	114122130
gene-LOC114125972	yes|down	1	gene-LOC114125972	LOC114125972	uncharacterized LOC114125972	420	7	16	18	2	0	1	0.92	3.23	2.46	0.27	0	0.13	2.20333	0.133333	0.0917938	-3.44546	0.00368784	0.0336589	yes	down	0	0	0	0	0	0	0	0	0	114125972
gene-LOC114120228	yes|down	1	gene-LOC114120228	LOC114120228	exosome complex component RRP42-like	1035	291.8	200.03	244.51	0	0	0	19.94	13.49	15.87	0	0	0	16.4333	0	0.000977835	-9.99812	1.46e-16	3.23e-14	yes	down	XP_027837876.1(exosome complex component RRP42-like [Aphis gossypii])	0	K12589	RRP42, EXOSC7	map03018(RNA degradation)	COG2123(J:Translation, ribosomal structure and biogenesis)	COG2123(Exosome complex)	PF01138.22(RNase_PH:3' exoribonuclease family, domain 1); PF03725.16(RNase_PH_C:3' exoribonuclease family, domain 2)	sp|Q15024|EXOS7_HUMAN(Exosome complex component RRP42 OS=Homo sapiens OX=9606 GN=EXOSC7 PE=1 SV=3)	114120228
gene-LOC114127978	yes|up	1	gene-LOC114127978	LOC114127978	peptide transporter family 1-like	2604	515	270	240	672	1244	628	12.03	6.3	5.39	16.33	30.61	14.5	7.90667	20.48	3.34186	1.74065	1.93e-05	0.000509901	yes	up	XP_027848169.1(peptide transporter family 1-like [Aphis gossypii])	GO:0006857(biological_process:oligopeptide transport); GO:0022857(molecular_function:transmembrane transporter activity); GO:0016021(cellular_component:integral component of membrane)	K14206	SLC15A1, PEPT1	map04974(Protein digestion and absorption)	COG3104(E:Amino acid transport and metabolism)	COG3104(transporter)	PF00854.22(PTR2:POT family); PF07690.17(MFS_1:Major Facilitator Superfamily)	sp|P91679|PEPT1_DROME(Peptide transporter family 1 OS=Drosophila melanogaster OX=7227 GN=yin PE=1 SV=2)	114127978
gene-LOC114124025	yes|down	1	gene-LOC114124025	LOC114124025	uncharacterized LOC114124025	2225	247	165	110	79	63	52	6.14	4.06	2.58	2.12	1.69	1.28	4.26	1.69667	0.487672	-1.03602	0.00260301	0.0254378	yes	down	XP_027842984.1(uncharacterized protein LOC114124025 [Aphis gossypii])	0	0	0	0	ENOG4111Y31(S:Function unknown)	ENOG4111Y31(-)	0	0	114124025
gene-LOC114120385	yes|down	1	gene-LOC114120385	LOC114120385	uncharacterized LOC114120385	1114	63	111	80	12	18	5	5.19	7.7	4.39	1.32	3.5	0.29	5.76	1.70333	0.178601	-2.48519	5.11e-06	0.000165055	yes	down	XP_027838070.1(uncharacterized protein LOC114120385 [Aphis gossypii])	0	0	0	0	0	0	0	0	114120385
gene-LOC114130497	yes|down	1	gene-LOC114130497	LOC114130497	aspartate aminotransferase, cytoplasmic-like, transcript variant X1	1998	1139	321	1297	150	164	142	35.35	10.35	39.14	5.05	5.44	4.36	28.28	4.95	0.216397	-2.20825	5.27e-06	0.0001684	yes	down	XP_027851284.1(aspartate aminotransferase, cytoplasmic-like isoform X1 [Aphis gossypii])	GO:0008483(molecular_function:transaminase activity); GO:0009058(biological_process:biosynthetic process); GO:0006520(biological_process:cellular amino acid metabolic process); GO:0030170(molecular_function:pyridoxal phosphate binding)	K14454	GOT1	map00220(Arginine biosynthesis); map00270(Cysteine and methionine metabolism); map00330(Arginine and proline metabolism); map00250(Alanine, aspartate and glutamate metabolism); map00360(Phenylalanine metabolism); map00350(Tyrosine metabolism); map00400(Phenylalanine, tyrosine and tryptophan biosynthesis)	COG1448(E:Amino acid transport and metabolism)	COG1448(aminotransferase)	PF00155.22(Aminotran_1_2:Aminotransferase class I and II)	sp|A5A6K8|AATC_PANTR(Aspartate aminotransferase, cytoplasmic OS=Pan troglodytes OX=9598 GN=GOT1 PE=2 SV=1)	114130497
gene-LOC114125702	yes|down	1	gene-LOC114125702	LOC114125702	uncharacterized LOC114125702	579	3902.92	9228.05	16051.3	252.19	416.9	1391.58	686.26	1583.49	2653.01	45.81	76.7	238.44	1640.92	120.317	0.0910237	-3.45761	7.34e-07	3e-05	yes	down	XP_027845270.1(uncharacterized protein LOC114125702 [Aphis gossypii])	0	0	0	0	ENOG410ZD56(S:Function unknown)	ENOG410ZD56(-)	0	0	114125702
gene-LOC114123584	yes|up	1	gene-LOC114123584	LOC114123584	glycoprotein 3-alpha-L-fucosyltransferase A-like, transcript variant X1	1890	5	14	7	139	35	83	0.15	0.5	0.21	4.62	1.19	2.63	0.286667	2.81333	12.3695	3.62871	1.09e-08	6.88e-07	yes	up	XP_027842415.1(glycoprotein 3-alpha-L-fucosyltransferase A-like isoform X1 [Aphis gossypii])	GO:0032580(cellular_component:Golgi cisterna membrane); GO:0016021(cellular_component:integral component of membrane); GO:0006486(biological_process:protein glycosylation); GO:0008417(molecular_function:fucosyltransferase activity)	K00753	E2.4.1.214	map00513(Various types of N-glycan biosynthesis)	ENOG410ZIMX(S:Function unknown)	ENOG410ZIMX((Alpha (1,3) fucosyltransferase)	PF00852.20(Glyco_transf_10:Glycosyltransferase family 10 (fucosyltransferase) C-term); PF17039.6(Glyco_tran_10_N:Fucosyltransferase, N-terminal)	sp|Q9VUL9|FUCTA_DROME(Glycoprotein 3-alpha-L-fucosyltransferase A OS=Drosophila melanogaster OX=7227 GN=FucTA PE=2 SV=2)	114123584
gene-LOC114128307	yes|up	1	gene-LOC114128307	LOC114128307	uncharacterized LOC114128307	3876	42	40	34	78	95	73	0.95	0.73	0.72	1.78	2.07	1.63	0.8	1.82667	2.77639	1.47321	1.75e-06	6.44e-05	yes	up	XP_027848589.1(uncharacterized protein LOC114128307 [Aphis gossypii])	0	0	0	0	COG5640(O:Posttranslational modification, protein turnover, chaperones)	COG5640(protease)	PF00089.27(Trypsin:Trypsin); PF00057.19(Ldl_recept_a:Low-density lipoprotein receptor domain class A)	sp|P28175|CFC_TACTR(Clotting factor C OS=Tachypleus tridentatus OX=6853 PE=1 SV=1)	114128307
gene-LOC114128982	yes|down	1	gene-LOC114128982	LOC114128982	uncharacterized LOC114128982	3332	203	199	117	84	47	54	7.24	6.9	4.82	3.81	1.97	1.9	6.32	2.56	0.46076	-1.11791	0.000639316	0.00872139	yes	down	XP_027849400.1(uncharacterized protein LOC114128982 [Aphis gossypii])	GO:0016021(cellular_component:integral component of membrane)	0	0	0	ENOG410Y8JF(S:Function unknown); ENOG4111F35(S:Function unknown)	ENOG410Y8JF(-); ENOG4111F35(-)	0	0	114128982
gene-LOC114129844	yes|down	1	gene-LOC114129844	LOC114129844	uncharacterized LOC114129844	873	603	841	894	344	221	234	52.64	72.32	74	31.24	20.39	20.18	66.32	23.9367	0.435144	-1.20043	1.24e-05	0.000351521	yes	down	XP_027850491.1(uncharacterized protein LOC114129844 [Aphis gossypii])	0	0	0	0	0	0	0	0	114129844
gene-LOC114129100	yes|down	1	gene-LOC114129100	LOC114129100	uncharacterized LOC114129100	2807	36	29	24	0	0	0	0.73	0.58	0.46	0	0	0	0.59	0	0.0081139	-6.94539	1.13e-07	5.79e-06	yes	down	XP_027849531.1(uncharacterized protein LOC114129100 [Aphis gossypii])	GO:0004435(molecular_function:phosphatidylinositol phospholipase C activity); GO:0005509(molecular_function:calcium ion binding); GO:0035556(biological_process:intracellular signal transduction); GO:0016042(biological_process:lipid catabolic process)	0	0	0	ENOG4111I69(S:Function unknown); ENOG410ZK1Y(S:Function unknown); ENOG410XSVG(S:Function unknown)	ENOG4111I69(transposon protein); ENOG410ZK1Y(-); ENOG410XSVG(-)	0	0	114129100
gene-LOC114122295	yes|up	1	gene-LOC114122295	LOC114122295	39S ribosomal protein L34, mitochondrial	497	250.35	189.14	228.76	439.83	344.71	326.58	61.11	44.77	52.19	110.52	87.52	77.02	52.69	91.6867	2.15722	1.10917	3.76e-09	2.57e-07	yes	up	XP_027840712.1(39S ribosomal protein L34, mitochondrial [Aphis gossypii])	GO:0006392(biological_process:transcription elongation from mitochondrial promoter); GO:0005739(cellular_component:mitochondrion)	K02914	RP-L34, MRPL34, rpmH	map03010(Ribosome)	ENOG410Y19V(J:Translation, ribosomal structure and biogenesis)	ENOG410Y19V(ribosomal protein l34)	PF00468.18(Ribosomal_L34:Ribosomal protein L34)	sp|Q0E959|RM34_DROME(39S ribosomal protein L34, mitochondrial OS=Drosophila melanogaster OX=7227 GN=mRpL34 PE=3 SV=1)	114122295
gene-LOC114121802	yes|up	1	gene-LOC114121802	LOC114121802	0	1213	18	22	25	51	120	73	1.02	1.33	1.34	3.16	7.39	4.21	1.23	4.92	4.95549	2.30903	2.48e-06	8.79e-05	yes	up	KAE9541205.1(hypothetical protein AGLY_004450, partial [Aphis glycines])	0	0	0	0	0	0	0	0	114121802
gene-LOC114119413	yes|down	1	gene-LOC114119413	LOC114119413	uncharacterized LOC114119413	2412	119	65	129	19	27	27	2.28	1.24	2.32	0.44	0.53	0.5	1.94667	0.49	0.305966	-1.70856	5.36e-05	0.0011741	yes	down	XP_027836763.1(uncharacterized protein LOC114119413, partial [Aphis gossypii])	0	0	0	0	COG2801(L:Replication, recombination and repair); ENOG410YP2D(S:Function unknown); ENOG410Y7Q4(S:Function unknown); ENOG410YHBQ(S:Function unknown); ENOG4112AZ8(S:Function unknown)	COG2801(Retrotransposon protein); ENOG410YP2D(Integrase core domain protein); ENOG410Y7Q4(-); ENOG410YHBQ(-); ENOG4112AZ8(-)	PF05380.14(Peptidase_A17:Pao retrotransposon peptidase); PF00078.28(RVT_1:Reverse transcriptase (RNA-dependent DNA polymerase)); PF05585.13(DUF1758:Putative peptidase (DUF1758))	0	114119413
gene-LOC114126603	yes|up	1	gene-LOC114126603	LOC114126603	cuticle protein 8-like	653	0	0	0	39.74	49.04	55.51	0	0	0	5.77	7.22	7.62	0	6.87	344.127	8.4268	2.62e-11	2.59e-09	yes	up	XP_027846390.1(cuticle protein 8-like [Aphis gossypii])	GO:0042302(molecular_function:structural constituent of cuticle)	0	0	0	ENOG410YXZN(S:Function unknown); ENOG410YXTN(S:Function unknown)	ENOG410YXZN(Cuticular protein); ENOG410YXTN(Cuticular protein)	PF00379.24(Chitin_bind_4:Insect cuticle protein)	sp|P11734|CU08_LOCMI(Cuticle protein 8 OS=Locusta migratoria OX=7004 PE=1 SV=1)	114126603
gene-LOC114125830	yes|up	1	gene-LOC114125830	LOC114125830	lipopolysaccharide-induced tumor necrosis factor-alpha factor homolog, transcript variant X2	768	474	412	744	1005	1006	1023	35.83	30.16	52.54	82.77	83.01	81.86	39.51	82.5467	2.40397	1.26542	1.64e-05	0.000443631	yes	up	XP_027845421.1(lipopolysaccharide-induced tumor necrosis factor-alpha factor homolog [Aphis gossypii])	GO:0016021(cellular_component:integral component of membrane)	K19363	LITAF	map04142(Lysosome)	ENOG4111Y6Y(S:Function unknown); ENOG41122PJ(S:Function unknown)	ENOG4111Y6Y(whole genome shotgun sequence); ENOG41122PJ(lipopolysaccharide-induced TNF factor)	PF10601.10(zf-LITAF-like:LITAF-like zinc ribbon domain)	sp|Q54HX8|CDIP1_DICDI(Cell death-inducing p53-target protein 1 homolog OS=Dictyostelium discoideum OX=44689 GN=litaf PE=3 SV=1)	114125830
gene-LOC114119412	yes|up	1	gene-LOC114119412	LOC114119412	uncharacterized LOC114119412	588	0	0	0	60	48	52	0	0	0	10.58	8.57	8.65	0	9.26667	375.542	8.55283	5.23e-12	5.68e-10	yes	up	XP_027836762.1(uncharacterized protein LOC114119412 [Aphis gossypii])	GO:0046983(molecular_function:protein dimerization activity)	0	0	0	ENOG4110WD6(S:Function unknown)	ENOG4110WD6(-)	0	0	114119412
gene-LOC114131663	yes|up	1	gene-LOC114131663	LOC114131663	uncharacterized LOC114131663	388	154.38	625.2	960.8	4675.09	4101.05	5557.29	83.58	342.73	501.35	2823.01	2486.73	3090.52	309.22	2800.09	10.3849	3.37642	5.18e-09	3.44e-07	yes	up	XP_026809935.1(uncharacterized protein LOC113551697 [Rhopalosiphum maidis])	0	0	0	0	ENOG410ZF17(S:Function unknown)	ENOG410ZF17(-)	0	0	114131663
gene-LOC114129197	yes|down	1	gene-LOC114129197	LOC114129197	uncharacterized LOC114129197	461	18.44	34.84	10.16	0	0	0	5.4	9.86	2.77	0	0	0	6.01	0	0.0113732	-6.45822	1.21e-05	0.000347178	yes	down	KAE9526204.1(hypothetical protein AGLY_013835 [Aphis glycines])	GO:0005856(cellular_component:cytoskeleton); GO:0004725(molecular_function:protein tyrosine phosphatase activity)	K18025	PTPN14_21	0	COG5599(T:Signal transduction mechanisms); ENOG410YUAM(T:Signal transduction mechanisms)	COG5599(protein tyrosine phosphatase); ENOG410YUAM(phosphatase, non-receptor type)	0	0	114129197
gene-LOC114121930	yes|down	1	gene-LOC114121930	LOC114121930	ionotropic receptor 40a	2694	21	26	16	3	3	2	0.44	0.55	0.32	0.07	0.07	0.04	0.436667	0.06	0.164942	-2.59997	0.000531455	0.00753604	yes	down	XP_027840243.1(ionotropic receptor 40a [Aphis gossypii])	GO:0016021(cellular_component:integral component of membrane); GO:0004970(molecular_function:ionotropic glutamate receptor activity)	K05313	GRIN	0	ENOG410XY2S(S:Function unknown); ENOG410Y034(S:Function unknown)	ENOG410XY2S(-); ENOG410Y034(-)	PF00060.27(Lig_chan:Ligand-gated ion channel); PF10613.10(Lig_chan-Glu_bd:Ligated ion channel L-glutamate- and glycine-binding site); PF00497.21(SBP_bac_3:Bacterial extracellular solute-binding proteins, family 3)	sp|Q9V9N1|IR40A_DROME(Ionotropic receptor 40a OS=Drosophila melanogaster OX=7227 GN=Ir40a PE=1 SV=4)	114121930
gene-LOC114131666	yes|up	1	gene-LOC114131666	LOC114131666	uncharacterized LOC114131666	361	711.15	2472.45	3580.55	7745.14	5875.46	9293.29	425.37	1406.88	1969.34	4793.42	3639.6	5268.42	1267.2	4567.15	4.26764	2.09344	0.000114245	0.00221182	yes	up	XP_026809935.1(uncharacterized protein LOC113551697 [Rhopalosiphum maidis])	0	0	0	0	ENOG410ZF17(S:Function unknown)	ENOG410ZF17(-)	0	0	114131666
gene-LOC114120099	yes|up	1	gene-LOC114120099	LOC114120099	cytochrome c oxidase assembly protein COX20, mitochondrial	779	230	189	218	412	310	302	23.93	19.34	21.48	44.54	34.03	30.96	21.5833	36.51	2.07901	1.0559	9.38e-09	5.96e-07	yes	up	XP_027837702.1(cytochrome c oxidase assembly protein COX20, mitochondrial [Aphis gossypii])	GO:0005743(cellular_component:mitochondrial inner membrane); GO:0033617(biological_process:mitochondrial respiratory chain complex IV assembly); GO:0016021(cellular_component:integral component of membrane)	K18184	COX20	map04714(Thermogenesis)	ENOG4111Y8F(S:Function unknown)	ENOG4111Y8F(COX20 Cox2 chaperone homolog (S. cerevisiae))	PF12597.9(DUF3767:Protein of unknown function (DUF3767))	sp|Q9D7J4|COX20_MOUSE(Cytochrome c oxidase assembly protein COX20, mitochondrial OS=Mus musculus OX=10090 GN=Cox20 PE=1 SV=1)	114120099
gene-LOC114131626	yes|down	1	gene-LOC114131626	LOC114131626	receptor-type tyrosine-protein phosphatase N2-like	863	340.81	368.89	242.47	138.69	99.1	80.13	30.27	32.27	20.42	12.81	9.3	7.03	27.6533	9.71333	0.431677	-1.21198	1.18e-05	0.000341189	yes	down	XP_027852689.1(receptor-type tyrosine-protein phosphatase N2-like [Aphis gossypii])	0	K07817	PTPRN	map04940(Type I diabetes mellitus)	COG5599(T:Signal transduction mechanisms)	COG5599(protein tyrosine phosphatase)	PF00102.28(Y_phosphatase:Protein-tyrosine phosphatase); PF00782.21(DSPc:Dual specificity phosphatase, catalytic domain)	sp|P80560|PTPR2_MOUSE(Receptor-type tyrosine-protein phosphatase N2 OS=Mus musculus OX=10090 GN=Ptprn2 PE=1 SV=2)	114131626
gene-LOC114131705	yes|up	1	gene-LOC114131705	LOC114131705	uncharacterized LOC114131705	2379	0	0	1	7	6	4	0	0	0.02	0.18	0.16	0.1	0.00666667	0.146667	20.4635	4.35498	0.00555201	0.0453444	yes	up	XP_027852801.1(uncharacterized protein LOC114131705 [Aphis gossypii])	0	0	0	0	ENOG410YP2D(S:Function unknown); ENOG4111CQS(S:Function unknown); COG2801(L:Replication, recombination and repair); ENOG410Y7Q4(S:Function unknown)	ENOG410YP2D(Integrase core domain protein); ENOG4111CQS(Pao retrotransposon peptidase); COG2801(Retrotransposon protein); ENOG410Y7Q4(-)	PF05380.14(Peptidase_A17:Pao retrotransposon peptidase)	0	114131705
gene-LOC114120095	yes|down	1	gene-LOC114120095	LOC114120095	piggyBac transposable element-derived protein 4-like	1683	53	82	94	4	0	1	2.14	6.68	9.18	1.54	0	0.46	6	0.666667	0.027555	-5.18154	3.03e-10	2.51e-08	yes	down	XP_027837698.1(piggyBac transposable element-derived protein 4-like, partial [Aphis gossypii])	0	0	0	0	ENOG410ZDPG(S:Function unknown); ENOG410XP35(S:Function unknown); ENOG4110JK7(S:Function unknown); ENOG410XVJ3(S:Function unknown)	ENOG410ZDPG(piggyBac transposable element derived); ENOG410XP35(PiggyBac transposable element derived 5); ENOG4110JK7(-); ENOG410XVJ3(piggyBac transposable element derived 4)	PF13843.7(DDE_Tnp_1_7:Transposase IS4)	sp|Q96DM1|PGBD4_HUMAN(PiggyBac transposable element-derived protein 4 OS=Homo sapiens OX=9606 GN=PGBD4 PE=2 SV=3)	114120095
gene-LOC114120319	yes|down	1	gene-LOC114120319	LOC114120319	teneurin-a, transcript variant X1	7704	2440	1839	1380	789	494	652	13.65	10.25	7.4	4.63	2.95	3.66	10.4333	3.74667	0.445022	-1.16805	1.14e-06	4.46e-05	yes	down	XP_027837992.1(teneurin-a isoform X1 [Aphis gossypii])	GO:0016021(cellular_component:integral component of membrane)	K24473	TENM, ODZ	0	ENOG410XQQD(S:Function unknown); ENOG410ZZMY(S:Function unknown)	ENOG410XQQD(Teneurin transmembrane protein); ENOG410ZZMY(-)	PF15636.7(Tox-GHH:GHH signature containing HNH/Endo VII superfamily nuclease toxin); PF07974.14(EGF_2:EGF-like domain)	sp|Q9VYN8|TENA_DROME(Teneurin-a OS=Drosophila melanogaster OX=7227 GN=Ten-a PE=1 SV=2)	114120319
gene-LOC114121527	yes|up	1	gene-LOC114121527	LOC114121527	dehydrogenase/reductase SDR family member 11-like	1298	198	272	109	391	608	302	10	13.58	5.24	20.61	32.6	15.16	9.60667	22.79	2.96671	1.56886	0.000241898	0.004067	yes	up	XP_027839721.1(dehydrogenase/reductase SDR family member 11-like [Aphis gossypii])	GO:0016491(molecular_function:oxidoreductase activity)	K15890	FOHSDR	map00981(Insect hormone biosynthesis); map00900(Terpenoid backbone biosynthesis)	COG4221(J:Translation, ribosomal structure and biogenesis)	COG4221(diphthamide biosynthesis protein)	PF00106.26(adh_short:short chain dehydrogenase); PF13561.7(adh_short_C2:Enoyl-(Acyl carrier protein) reductase); PF01370.22(Epimerase:NAD dependent epimerase/dehydratase family); PF13460.7(NAD_binding_10:NAD(P)H-binding); PF08659.11(KR:KR domain)	sp|Q3ZBV9|DHR11_BOVIN(Dehydrogenase/reductase SDR family member 11 OS=Bos taurus OX=9913 GN=DHRS11 PE=2 SV=1)	114121527
gene-LOC114126235	yes|up	1	gene-LOC114126235	LOC114126235	alpha-L-fucosidase, transcript variant X1	1589	396	387	250	483	698	413	15.52	15.02	9.33	19.77	29.09	16.11	13.29	21.6567	2.03883	1.02774	0.00104936	0.0127162	yes	up	XP_027845931.1(alpha-L-fucosidase [Aphis gossypii])	GO:0006004(biological_process:fucose metabolic process); GO:0004560(molecular_function:alpha-L-fucosidase activity)	K01206	FUCA	map00511(Other glycan degradation); map04142(Lysosome)	COG3669(G:Carbohydrate transport and metabolism)	COG3669(alpha-l-fucosidase)	PF01120.18(Alpha_L_fucos:Alpha-L-fucosidase); PF16757.6(Fucosidase_C:Alpha-L-fucosidase C-terminal domain)	sp|C3YWU0|FUCO_BRAFL(Alpha-L-fucosidase OS=Branchiostoma floridae OX=7739 GN=BRAFLDRAFT_56888 PE=3 SV=2)	114126235
gene-LOC114128498	yes|up	1	gene-LOC114128498	LOC114128498	39S ribosomal protein L21, mitochondrial-like	809	66.45	5.93	4.71	192.4	143.45	122.62	6.52	0.57	0.44	19.61	14.85	11.86	2.51	15.44	8.10644	3.01907	0.000275947	0.00452694	yes	up	XP_027848820.1(39S ribosomal protein L21, mitochondrial-like [Aphis gossypii])	GO:0005840(cellular_component:ribosome)	K02888	RP-L21, MRPL21, rplU	map03010(Ribosome)	ENOG4111TX4(J:Translation, ribosomal structure and biogenesis)	ENOG4111TX4(ribosomal protein l21)	PF00829.22(Ribosomal_L21p:Ribosomal prokaryotic L21 protein)	sp|Q2TBS2|RM21_BOVIN(39S ribosomal protein L21, mitochondrial OS=Bos taurus OX=9913 GN=MRPL21 PE=1 SV=1)	114128498
gene-LOC114130162	yes|down	1	gene-LOC114130162	LOC114130162	late cornified envelope-like proline-rich protein 1	1201	13708	18590	20454	7321	3835	4237	836.25	1189.83	1276.56	435.04	237.38	241.72	1100.88	304.713	0.368902	-1.43869	1.47e-06	5.47e-05	yes	down	XP_027850869.1(late cornified envelope-like proline-rich protein 1 [Aphis gossypii])	GO:0016021(cellular_component:integral component of membrane)	0	0	0	0	0	0	0	114130162
gene-LOC114126339	yes|down	1	gene-LOC114126339	LOC114126339	zinc finger MYM-type protein 1-like	1296	3	11	11	0	0	0	0.15	0.55	0.53	0	0	0	0.41	0	0.0280432	-5.1562	0.00289581	0.027821	yes	down	XP_027846056.1(zinc finger MYM-type protein 1-like [Aphis gossypii])	0	0	0	0	ENOG410XQ1Y(S:Function unknown); ENOG4111KQW(S:Function unknown); ENOG4111F5X(S:Function unknown); ENOG410YEB2(S:Function unknown)	ENOG410XQ1Y(Tubulin tyrosine ligase-like family, member); ENOG4111KQW(Tubulin tyrosine ligase-like family, member); ENOG4111F5X(Tubulin tyrosine ligase-like family, member); ENOG410YEB2(-)	PF14291.7(DUF4371:Domain of unknown function (DUF4371))	sp|Q5SVZ6|ZMYM1_HUMAN(Zinc finger MYM-type protein 1 OS=Homo sapiens OX=9606 GN=ZMYM1 PE=1 SV=1)	114126339
gene-LOC114126233	yes|down	1	gene-LOC114126233	LOC114126233	uncharacterized LOC114126233	360	120.79	68.95	49.54	0	0	0	72.93	39.59	27.5	0	0	0	46.6733	0	0.00304352	-8.36004	7.12e-11	6.76e-09	yes	down	XP_022164833.1(translocon-associated protein subunit gamma [Myzus persicae])	GO:0016021(cellular_component:integral component of membrane); GO:0006614(biological_process:SRP-dependent cotranslational protein targeting to membrane); GO:0005783(cellular_component:endoplasmic reticulum)	K13251	SSR3	map04141(Protein processing in endoplasmic reticulum)	ENOG410XR1X(U:Intracellular trafficking, secretion, and vesicular transport)	ENOG410XR1X(signal sequence receptor, gamma (translocon-associated protein gamma))	0	sp|Q9UNL2|SSRG_HUMAN(Translocon-associated protein subunit gamma OS=Homo sapiens OX=9606 GN=SSR3 PE=1 SV=1)	114126233
gene-LOC114124657	yes|up	1	gene-LOC114124657	LOC114124657	uncharacterized LOC114124657	601	931	904	495	1221	1731	1173	152.19	144.39	76.15	206.37	296.46	187.19	124.243	230.007	2.34526	1.22975	0.000115442	0.00223123	yes	up	KAF0769920.1(Uncharacterized protein FWK35_00002695 [Aphis craccivora])	0	K08059	IFI30, GILT	map04612(Antigen processing and presentation)	ENOG4111IDT(S:Function unknown)	ENOG4111IDT(Lysosomal thiol)	0	sp|Q95RA9|GILT1_DROME(GILT-like protein 1 OS=Drosophila melanogaster OX=7227 GN=GILT1 PE=1 SV=1)	114124657
gene-LOC114128865	yes|down	1	gene-LOC114128865	LOC114128865	glycine-rich cell wall structural protein 1.8-like, transcript variant X1	2904	1145.06	2198	1677	382	232	122	23.49	44.87	32.84	8.49	5.48	2.72	33.7333	5.56333	0.184867	-2.43544	1.8e-08	1.07e-06	yes	down	XP_027849266.1(uncharacterized PE-PGRS family protein PE_PGRS54-like isoform X1 [Aphis gossypii])	0	0	0	0	0	0	0	0	114128865
gene-LOC114132163	yes|up	1	gene-LOC114132163	LOC114132163	uncharacterized LOC114132163, transcript variant X1	2530	10	7	3	89	74	86	0.3	0.19	0.08	2.49	2.14	2.26	0.19	2.29667	16.2692	4.02407	6.55e-19	1.93e-16	yes	up	XP_027853346.1(uncharacterized protein LOC114132163 isoform X1 [Aphis gossypii])	0	0	0	0	ENOG410YTVD(S:Function unknown)	ENOG410YTVD(-)	PF15992.6(DUF4769:Domain of unknown function (DUF4769))	0	114132163
gene-LOC114125177	yes|down	1	gene-LOC114125177	LOC114125177	carbonic anhydrase 2-like, transcript variant X1	1371	687	972	795	406	291	211	38.91	54.99	45.44	25.27	17.06	11.7	46.4467	18.01	0.472977	-1.08016	0.000198239	0.00346467	yes	down	XP_027844508.1(carbonic anhydrase 2-like [Aphis gossypii])	GO:0004089(molecular_function:carbonate dehydratase activity); GO:0008270(molecular_function:zinc ion binding)	K01672	CA	map00910(Nitrogen metabolism)	COG3338(P:Inorganic ion transport and metabolism)	COG3338(Carbonic anhydrase)	PF00194.22(Carb_anhydrase:Eukaryotic-type carbonic anhydrase)	sp|P00918|CAH2_HUMAN(Carbonic anhydrase 2 OS=Homo sapiens OX=9606 GN=CA2 PE=1 SV=2)	114125177
gene-LOC114129749	yes|down	1	gene-LOC114129749	LOC114129749	NFX1-type zinc finger-containing protein 1-like, transcript variant X1	7316	3170	4004	3410	1493	1048	632	23.49	29.25	24.25	11.59	8.26	4.68	25.6633	8.17667	0.383017	-1.38452	1.08e-05	0.000313823	yes	down	XP_027850376.1(NFX1-type zinc finger-containing protein 1-like [Aphis gossypii])	GO:0003700(molecular_function:transcription factor activity, sequence-specific DNA binding); GO:0005634(cellular_component:nucleus); GO:0008270(molecular_function:zinc ion binding)	0	0	0	COG1112(L:Replication, recombination and repair); COG2801(L:Replication, recombination and repair)	COG1112(Helicase); COG2801(Retrotransposon protein)	PF13087.7(AAA_12:AAA domain); PF13086.7(AAA_11:AAA domain); PF13245.7(AAA_19:AAA domain); PF13604.7(AAA_30:AAA domain); PF04851.16(ResIII:Type III restriction enzyme, res subunit)	sp|Q8R151|ZNFX1_MOUSE(NFX1-type zinc finger-containing protein 1 OS=Mus musculus OX=10090 GN=Znfx1 PE=1 SV=3)	114129749
gene-LOC114132744	yes|down	1	gene-LOC114132744	LOC114132744	zinc finger MYM-type protein 1-like, transcript variant X1	1833	45	36	18	9	4	2	2.42	2.07	1.14	0.43	0.14	0.07	1.87667	0.213333	0.196086	-2.35044	0.00084025	0.0107009	yes	down	XP_022179494.1(zinc finger MYM-type protein 1-like [Myzus persicae])	0	0	0	0	0	0	PF14291.7(DUF4371:Domain of unknown function (DUF4371))	sp|Q5SVZ6|ZMYM1_HUMAN(Zinc finger MYM-type protein 1 OS=Homo sapiens OX=9606 GN=ZMYM1 PE=1 SV=1)	114132744
gene-LOC114129434	yes|up	1	gene-LOC114129434	LOC114129434	uncharacterized LOC114129434	829	0	0	0	14.99	4.08	20.22	0	0	0	1.47	0.41	1.88	0	1.25333	90.6302	6.50192	3.18e-05	0.000784125	yes	up	XP_027849962.1(uncharacterized protein LOC114129434 [Aphis gossypii])	GO:0008284(biological_process:positive regulation of cell proliferation); GO:0006355(biological_process:regulation of transcription, DNA-templated)	K23408	CDCA7, JPO1	0	ENOG410ZWEA(S:Function unknown)	ENOG410ZWEA(Cell division cycle associated 7)	0	0	114129434
gene-LOC114129714	yes|down	1	gene-LOC114129714	LOC114129714	pancreatic lipase-related protein 2-like	1303	287	380	392	178	115	95	14.79	19.3	19.25	8.97	5.87	4.57	17.78	6.47	0.466659	-1.09956	0.000269261	0.00444261	yes	down	XP_027850335.1(pancreatic lipase-related protein 2-like [Aphis gossypii])	GO:0005576(cellular_component:extracellular region); GO:0006629(biological_process:lipid metabolic process); GO:0052689(molecular_function:carboxylic ester hydrolase activity)	0	0	0	ENOG410ZKVQ(S:Function unknown); ENOG410Y91Z(S:Function unknown)	ENOG410ZKVQ(-); ENOG410Y91Z(Lipase)	PF00151.20(Lipase:Lipase)	sp|P81139|LIPR2_CAVPO(Pancreatic lipase-related protein 2 OS=Cavia porcellus OX=10141 GN=PNLIPRP2 PE=1 SV=1)	114129714
gene-LOC114122044	yes|up	1	gene-LOC114122044	LOC114122044	39S ribosomal protein L11, mitochondrial-like	785	430.62	343.48	404.23	798.77	643.57	569.91	44.27	34.72	39.34	85.32	69.81	57.73	39.4433	70.9533	2.21326	1.14617	1.48e-10	1.34e-08	yes	up	XP_027840399.1(39S ribosomal protein L11, mitochondrial-like [Aphis gossypii])	GO:0070180(molecular_function:large ribosomal subunit rRNA binding); GO:0015934(cellular_component:large ribosomal subunit); GO:0005840(cellular_component:ribosome); GO:0019843(molecular_function:rRNA binding); GO:0003735(molecular_function:structural constituent of ribosome); GO:0005762(cellular_component:mitochondrial large ribosomal subunit); GO:0006412(biological_process:translation); GO:0000…	K02867	RP-L11, MRPL11, rplK	map03010(Ribosome)	COG0080(S:Function unknown)	COG0080(-)	PF03946.15(Ribosomal_L11_N:Ribosomal protein L11, N-terminal domain); PF00298.20(Ribosomal_L11:Ribosomal protein L11, RNA binding domain)	sp|Q9VFJ2|RM11_DROME(39S ribosomal protein L11, mitochondrial OS=Drosophila melanogaster OX=7227 GN=mRpL11 PE=2 SV=1)	114122044
gene-LOC114118945	yes|down	1	gene-LOC114118945	LOC114118945	uncharacterized LOC114118945	1282	1916	1538	1724	631	521	828	98.32	78.05	84.2	33.79	28.39	42.22	86.8567	34.8	0.498296	-1.00492	8.13e-06	0.00024673	yes	down	XP_027836180.1(LOW QUALITY PROTEIN: uncharacterized protein LOC114118945 [Aphis gossypii])	GO:0016021(cellular_component:integral component of membrane)	K18264	ITM2B	0	ENOG410XRNN(S:Function unknown)	ENOG410XRNN(integral membrane protein)	PF04089.15(BRICHOS:BRICHOS domain)	sp|Q52N47|ITM2B_PIG(Integral membrane protein 2B OS=Sus scrofa OX=9823 GN=ITM2B PE=2 SV=1)	114118945
gene-LOC114130544	yes|down	1	gene-LOC114130544	LOC114130544	uncharacterized LOC114130544	3531	736	1052	911	349	256	290	23.03	32.13	27.45	10.3	8.21	7.13	27.5367	8.54667	0.425351	-1.23327	1.47e-07	7.34e-06	yes	down	XP_027851333.1(uncharacterized protein LOC114130544 [Aphis gossypii])	GO:0016021(cellular_component:integral component of membrane)	0	0	0	ENOG410XRJN(S:Function unknown); ENOG4111F5N(S:Function unknown); ENOG410YW6A(S:Function unknown)	ENOG410XRJN(nephrosis 1, congenital, Finnish type (nephrin)); ENOG4111F5N(CD80-like C2-set immunoglobulin domain); ENOG410YW6A(CD80-like C2-set immunoglobulin domain)	PF13927.7(Ig_3:Immunoglobulin domain); PF00047.26(ig:Immunoglobulin domain); PF07679.17(I-set:Immunoglobulin I-set domain); PF13895.7(Ig_2:Immunoglobulin domain); PF08205.13(C2-set_2:CD80-like C2-set immunoglobulin domain); PF07686.18(V-set:Immunoglobulin V-set domain); PF07654.16(C1-set:Immunoglobulin C1-set domain)	sp|O60500|NPHN_HUMAN(Nephrin OS=Homo sapiens OX=9606 GN=NPHS1 PE=1 SV=1)	114130544
gene-LOC114123267	yes|up	1	gene-LOC114123267	LOC114123267	dynamin-1-like protein	2127	0	3	0	8	9	23	0	0.08	0	0.23	0.27	0.64	0.0266667	0.38	17.3347	4.11559	0.0015509	0.0170673	yes	up	XP_027841973.1(dynamin-1-like protein [Aphis gossypii])	GO:0003924(molecular_function:GTPase activity); GO:0005525(molecular_function:GTP binding)	K17065	DNM1L	map04621(NOD-like receptor signaling pathway); map04217(Necroptosis); map04668(TNF signaling pathway); map04214(Apoptosis - fly)	COG0699(S:Function unknown)	COG0699(Heparan sulfate 2-o-sulfotransferase)	PF01031.21(Dynamin_M:Dynamin central region); PF00350.24(Dynamin_N:Dynamin family); PF02212.19(GED:Dynamin GTPase effector domain); PF01926.24(MMR_HSR1:50S ribosome-binding GTPase)	sp|Q7SXN5|DNM1L_DANRE(Dynamin-1-like protein OS=Danio rerio OX=7955 GN=dnm1l PE=2 SV=1)	114123267
gene-LOC114129582	yes|down	1	gene-LOC114129582	LOC114129582	high mobility group nucleosome-binding domain-containing protein 5-like, transcript variant X2	1708	5182	8124	5159	3578	2041	1256	194.39	301.8	186.53	135.04	79.37	46	227.573	86.8033	0.471901	-1.08344	0.00502841	0.0421002	yes	down	XP_027850171.1(high mobility group nucleosome-binding domain-containing protein 5-like isoform X2 [Aphis gossypii])	0	0	0	0	0	0	0	0	114129582
gene-LOC114128605	yes|up	1	gene-LOC114128605	LOC114128605	nucleolin-like	870	0	0	0	1090.45	2217.25	1124.89	0	0	0	99.54	205.65	97.5	0	134.23	10650	13.3786	1.25e-26	5.73e-24	yes	up	KAE9542730.1(hypothetical protein AGLY_002641 [Aphis glycines])	0	0	0	0	0	0	0	0	114128605
gene-LOC114123108	yes|down	1	gene-LOC114123108	LOC114123108	uncharacterized LOC114123108	503	56	31	36	0	0	2	13.3	8.79	8.39	0	0	0.46	10.16	0.153333	0.0213859	-5.5472	1.43e-06	5.38e-05	yes	down	XP_027841773.1(uncharacterized protein LOC114123108 [Aphis gossypii])	0	0	0	0	0	0	0	0	114123108
gene-LOC114123693	yes|up	1	gene-LOC114123693	LOC114123693	0	439	3887.01	13408	20038	25984.5	25595.3	33873.7	1292.45	4296.36	6192.54	8885.46	8817.07	10798	3927.12	9500.17	2.89961	1.53586	0.00472472	0.0403073	yes	up	XP_022173616.1(uncharacterized protein LOC111036037 [Myzus persicae])	0	0	0	0	ENOG410ZF17(S:Function unknown)	ENOG410ZF17(-)	0	0	114123693
gene-LOC114121388	yes|down	1	gene-LOC114121388	LOC114121388	uncharacterized LOC114121388	1179	51	38	38	3	1	1	2.92	2.15	2.07	0.18	0.06	0.06	2.38	0.1	0.0510593	-4.29168	4.13e-08	2.25e-06	yes	down	XP_027839496.1(uncharacterized protein LOC114121388 [Aphis gossypii])	0	0	0	0	ENOG410Z9TD(S:Function unknown); ENOG410Y7Q4(S:Function unknown); COG2801(S:Function unknown); ENOG410Z1QR(L:Replication, recombination and repair)	ENOG410Z9TD(Protein of unknown function (DUF1759)); ENOG410Y7Q4(-); COG2801(-); ENOG410Z1QR(Retrotransposon protein)	PF05585.13(DUF1758:Putative peptidase (DUF1758)); PF13650.7(Asp_protease_2:Aspartyl protease)	0	114121388
gene-LOC114121387	yes|down	1	gene-LOC114121387	LOC114121387	uncharacterized LOC114121387	817	31	32	45	2	0	4	2.99	3.04	4.12	0.2	0	0.38	3.38333	0.193333	0.0712936	-3.81008	3.19e-06	0.000108906	yes	down	XP_027839495.1(uncharacterized protein LOC114121387, partial [Aphis gossypii])	GO:0015074(biological_process:DNA integration); GO:0003676(molecular_function:nucleic acid binding)	0	0	0	COG2801(O:Posttranslational modification, protein turnover, chaperones); ENOG410Y7Q4(O:Posttranslational modification, protein turnover, chaperones)	COG2801(26s proteasome); ENOG410Y7Q4(26s proteasome)	PF05380.14(Peptidase_A17:Pao retrotransposon peptidase); PF00078.28(RVT_1:Reverse transcriptase (RNA-dependent DNA polymerase))	0	114121387
gene-LOC114125012	yes|up	1	gene-LOC114125012	LOC114125012	legumain-like	1555	10887.1	11401.8	13598.6	33770.7	23015	16688.9	438.15	454.3	521.45	1419.45	984.71	668.52	471.3	1024.23	2.61311	1.38577	5.21e-07	2.19e-05	yes	up	XP_027844286.1(legumain-like [Aphis gossypii])	0	K01369	LGMN	map04612(Antigen processing and presentation); map04142(Lysosome)	COG5206(O:Posttranslational modification, protein turnover, chaperones)	COG5206(phosphatidylinositol glycan anchor biosynthesis, class K)	PF01650.19(Peptidase_C13:Peptidase C13 family)	sp|Q95M12|LGMN_BOVIN(Legumain OS=Bos taurus OX=9913 GN=LGMN PE=1 SV=1)	114125012
gene-LOC114131409	yes|down	1	gene-LOC114131409	LOC114131409	zinc finger MYM-type protein 1-like	2474	69	54	49	10	6	8	3.03	2.4	1.81	0.28	0.21	0.25	2.41333	0.246667	0.181411	-2.46267	5.2e-08	2.82e-06	yes	down	XP_027852414.1(zinc finger MYM-type protein 1-like [Aphis gossypii])	0	0	0	0	ENOG410XQ1Y(S:Function unknown)	ENOG410XQ1Y(zinc finger)	PF14291.7(DUF4371:Domain of unknown function (DUF4371)); PF05699.15(Dimer_Tnp_hAT:hAT family C-terminal dimerisation region)	sp|Q5SVZ6|ZMYM1_HUMAN(Zinc finger MYM-type protein 1 OS=Homo sapiens OX=9606 GN=ZMYM1 PE=1 SV=1)	114131409
gene-LOC114130945	yes|down	1	gene-LOC114130945	LOC114130945	nose resistant to fluoxetine protein 6	2195	1563	1840	3074	809	679	819	41.77	48.76	78.39	22.61	19.32	21.84	56.3067	21.2567	0.455663	-1.13396	0.000482391	0.00690779	yes	down	XP_027851850.1(nose resistant to fluoxetine protein 6 [Aphis gossypii])	GO:0016021(cellular_component:integral component of membrane); GO:0016747(molecular_function:transferase activity, transferring acyl groups other than amino-acyl groups)	0	0	0	ENOG410YD1T(S:Function unknown)	ENOG410YD1T(nose resistant to fluoxetine protein 6-like)	PF01757.23(Acyl_transf_3:Acyltransferase family)	sp|Q09225|NRF6_CAEEL(Nose resistant to fluoxetine protein 6 OS=Caenorhabditis elegans OX=6239 GN=nrf-6 PE=1 SV=3)	114130945
gene-LOC114131167	yes|up	1	gene-LOC114131167	LOC114131167	uncharacterized LOC114131167	1842	0	0	0	31	26	47	0	0	0	1.06	0.91	1.54	0	1.17	245.375	7.93885	1.1e-09	8.11e-08	yes	up	XP_027852128.1(uncharacterized protein LOC114131167 [Aphis gossypii])	0	0	0	0	ENOG4112AZ8(S:Function unknown); ENOG4111PX2(S:Function unknown); COG2801(L:Replication, recombination and repair)	ENOG4112AZ8(-); ENOG4111PX2(-); COG2801(Retrotransposon protein)	PF05585.13(DUF1758:Putative peptidase (DUF1758)); PF13650.7(Asp_protease_2:Aspartyl protease)	0	114131167
gene-LOC114123087	yes|down	1	gene-LOC114123087	LOC114123087	uncharacterized LOC114123087, transcript variant X1	1401	85	134	125	2	0	2	3.92	6.11	5.49	0.1	0	0.09	5.17333	0.0633333	0.0148718	-6.07127	2.38e-13	3.56e-11	yes	down	XP_027841751.1(uncharacterized protein LOC114123087 isoform X1 [Aphis gossypii])	0	0	0	0	ENOG410YWDK(S:Function unknown); ENOG410YDX6(S:Function unknown); COG0507(L:Replication, recombination and repair)	ENOG410YWDK(-); ENOG410YDX6(-); COG0507(exodeoxyribonuclease v alpha)	0	0	114123087
gene-LOC114126602	yes|up	1	gene-LOC114126602	LOC114126602	cuticle protein 7-like	644	153	193	155	228.26	316.96	351.49	21.98	27.15	21	33.96	47.82	49.45	23.3767	43.7433	2.34341	1.22861	3.17e-05	0.000781967	yes	up	XP_027846389.1(cuticle protein 7-like [Aphis gossypii])	GO:0042302(molecular_function:structural constituent of cuticle)	0	0	0	ENOG410YXZN(S:Function unknown); ENOG410YXTN(S:Function unknown); ENOG410YSFI(S:Function unknown)	ENOG410YXZN(Cuticular protein); ENOG410YXTN(Cuticular protein); ENOG410YSFI(Cuticular protein)	PF00379.24(Chitin_bind_4:Insect cuticle protein)	sp|P11734|CU08_LOCMI(Cuticle protein 8 OS=Locusta migratoria OX=7004 PE=1 SV=1)	114126602
gene-LOC114131166	yes|up	1	gene-LOC114131166	LOC114131166	uncharacterized LOC114131166	2529	0	0	0	53	57	70	0	0	0	1.26	1.38	1.59	0	1.41	426.045	8.73486	2.54e-12	3.1e-10	yes	up	XP_027852126.1(uncharacterized protein LOC114131166 [Aphis gossypii])	GO:0015074(biological_process:DNA integration); GO:0003676(molecular_function:nucleic acid binding)	0	0	0	ENOG4112AZ8(S:Function unknown); ENOG4111PX2(S:Function unknown); COG2801(L:Replication, recombination and repair)	ENOG4112AZ8(-); ENOG4111PX2(-); COG2801(Retrotransposon protein)	PF05380.14(Peptidase_A17:Pao retrotransposon peptidase); PF18701.2(DUF5641:Family of unknown function (DUF5641)); PF17921.2(Integrase_H2C2:Integrase zinc binding domain); PF09337.11(zf-H2C2:H2C2 zinc finger)	0	114131166
gene-LOC114128324	yes|down	1	gene-LOC114128324	LOC114128324	uncharacterized LOC114128324	611	192.76	170.27	274.86	0	0	4.78	30.53	26.37	40.99	0	0	0.74	32.63	0.246667	0.0101447	-6.62313	1.4e-17	3.51e-15	yes	down	XP_027848611.1(uncharacterized protein LOC114128324 [Aphis gossypii])	GO:0016021(cellular_component:integral component of membrane)	0	0	0	ENOG410Y808(S:Function unknown)	ENOG410Y808(-)	0	0	114128324
gene-LOC114130656	yes|down	1	gene-LOC114130656	LOC114130656	uncharacterized LOC114130656	1893	76	50	48	0	0	0	1.88	1.24	1.13	0	0	0	1.41667	0	0.00416214	-7.90846	3.57e-10	2.93e-08	yes	down	XP_027851467.1(LOW QUALITY PROTEIN: uncharacterized protein LOC114130656 [Aphis gossypii])	0	0	0	0	ENOG410ZP20(S:Function unknown)	ENOG410ZP20(-)	PF10551.10(MULE:MULE transposase domain)	0	114130656
gene-LOC114127182	yes|down	1	gene-LOC114127182	LOC114127182	protein ABHD18	1600	494	1157	3759	431	361	222	13.28	30.25	89.72	11.23	9.4	5.84	44.4167	8.82333	0.233706	-2.09723	0.00160209	0.01753	yes	down	XP_027847154.1(protein ABHD18 [Aphis gossypii])	GO:0016787(molecular_function:hydrolase activity)	0	0	0	ENOG410XW3S(S:Function unknown)	ENOG410XW3S(chromosome 4 open reading frame 29)	PF09752.10(DUF2048:Abhydrolase domain containing 18); PF00561.21(Abhydrolase_1:alpha/beta hydrolase fold)	sp|Q8C1A9|ABD18_MOUSE(Protein ABHD18 OS=Mus musculus OX=10090 GN=Abhd18 PE=2 SV=1)	114127182
gene-LOC114127067	yes|up	1	gene-LOC114127067	LOC114127067	thyroxine-binding globulin-like	2783	2159	2614	1486	3038	4213	3912	44.1	52.97	28.98	64.91	91.7	79.78	42.0167	78.7967	2.34966	1.23245	2.19e-05	0.000565659	yes	up	XP_027846982.1(thyroxine-binding globulin-like [Aphis gossypii])	GO:0005615(cellular_component:extracellular space)	K13963	SERPINB	map05146(Amoebiasis)	COG4826(O:Posttranslational modification, protein turnover, chaperones)	COG4826(serine-type endopeptidase inhibitor activity)	PF00079.21(Serpin:Serpin (serine protease inhibitor))	sp|Q5JJ64|Y1782_THEKO(Uncharacterized serpin-like protein TK1782 OS=Thermococcus kodakarensis (strain ATCC BAA-918 / JCM 12380 / KOD1) OX=69014 GN=TK1782 PE=3 SV=1)	114127067
gene-LOC114128047	yes|down	1	gene-LOC114128047	LOC114128047	venom protease-like	1395	680.18	1193.33	1344.04	452.99	422.38	380.88	33.87	61.84	66.23	23.36	22.46	18.85	53.98	21.5567	0.499307	-1.002	0.00220822	0.0224731	yes	down	XP_027848259.1(venom protease-like [Aphis gossypii])	0	K23440;K09640	PRSS56;TMPRSS9	0	COG5640(O:Posttranslational modification, protein turnover, chaperones)	COG5640(protease)	PF00089.27(Trypsin:Trypsin); PF03761.16(DUF316:Nematode trypsin-6-like family)	sp|B5U2W0|VSP_BOMIG(Venom serine protease Bi-VSP OS=Bombus ignitus OX=130704 PE=1 SV=1)	114128047
gene-LOC114123401	yes|down	1	gene-LOC114123401	LOC114123401	receptor expression-enhancing protein 5-like	1000	64	43	56	2	3	4	4.59	3.04	3.81	0.15	0.23	0.28	3.81333	0.22	0.07219	-3.79206	1.35e-09	9.76e-08	yes	down	XP_027842154.1(receptor expression-enhancing protein 5-like [Aphis gossypii])	GO:0016021(cellular_component:integral component of membrane)	K17279	REEP5_6	0	COG5052(U:Intracellular trafficking, secretion, and vesicular transport)	COG5052(receptor accessory protein)	PF03134.20(TB2_DP1_HVA22:TB2/DP1, HVA22 family)	sp|Q29RM3|REEP5_BOVIN(Receptor expression-enhancing protein 5 OS=Bos taurus OX=9913 GN=REEP5 PE=2 SV=1)	114123401
gene-LOC114125650	yes|up	1	gene-LOC114125650	LOC114125650	pro-resilin-like	568	134	138	62	187	189	220	24.49	24.59	10.64	35.29	36.11	39.14	19.9067	36.8467	2.34735	1.23103	0.000317158	0.00505169	yes	up	XP_027845197.1(pro-resilin-like [Aphis gossypii])	GO:0042302(molecular_function:structural constituent of cuticle)	0	0	0	ENOG410ZB5T(S:Function unknown); ENOG410XQTS(S:Function unknown); ENOG41128ZS(S:Function unknown)	ENOG410ZB5T(-); ENOG410XQTS(coiled-coil domain containing 65); ENOG41128ZS(Cuticular protein)	PF00379.24(Chitin_bind_4:Insect cuticle protein)	sp|Q9V7U0|RESIL_DROME(Pro-resilin OS=Drosophila melanogaster OX=7227 GN=resilin PE=1 SV=1)	114125650
gene-LOC114132192	yes|up	1	gene-LOC114132192	LOC114132192	uncharacterized peptidase C1-like protein F26E4.3	908	3.9	3.78	0	37.75	30.96	54.21	0.32	0.31	0	3.24	2.7	4.41	0.21	3.45	20.1813	4.33495	3.04e-09	2.13e-07	yes	up	XP_027853387.1(uncharacterized peptidase C1-like protein F26E4.3 [Aphis gossypii])	0	0	0	0	COG4870(O:Posttranslational modification, protein turnover, chaperones); ENOG410YN9K(O:Posttranslational modification, protein turnover, chaperones)	COG4870(cathepsin); ENOG410YN9K(tubulointerstitial nephritis)	PF00112.24(Peptidase_C1:Papain family cysteine protease)	sp|P90850|YCF2E_CAEEL(Uncharacterized peptidase C1-like protein F26E4.3 OS=Caenorhabditis elegans OX=6239 GN=F26E4.3 PE=1 SV=3)	114132192
gene-LOC114123364	yes|down	1	gene-LOC114123364	LOC114123364	uncharacterized LOC114123364	867	339	434	299	62	63	29	32.67	37.7	25.01	5.69	5.87	2.53	31.7933	4.69667	0.186121	-2.42569	8.59e-12	9.07e-10	yes	down	XP_026812042.1(uncharacterized protein LOC113553094 [Rhopalosiphum maidis])	0	0	0	0	0	0	0	0	114123364
gene-LOC114131326	yes|up	1	gene-LOC114131326	LOC114131326	uncharacterized LOC114131326	1105	0	1	0	106	79	66	0	0.06	0	6.9	5.23	4.09	0.02	5.40667	301.257	8.23485	2.28e-11	2.3e-09	yes	up	XP_027852320.1(uncharacterized protein LOC114131326 [Aphis gossypii])	0	0	0	0	0	0	0	0	114131326
gene-LOC114121419	yes|up	1	gene-LOC114121419	LOC114121419	myrosinase 1-like	1419	0	0.07	5.46	113.01	57.73	101.76	0	0	0.15	5.17	2.77	4.49	0.05	4.14333	69.332	6.11545	9.25e-14	1.44e-11	yes	up	XP_027839550.1(myrosinase 1-like, partial [Aphis gossypii])	GO:0019137(molecular_function:thioglucosidase activity); GO:0046872(molecular_function:metal ion binding); GO:0005975(biological_process:carbohydrate metabolic process); GO:0102799(molecular_function:glucosinolate glucohydrolase activity); GO:0004553(molecular_function:hydrolase activity, hydrolyzing O-glycosyl compounds)	0	0	0	COG2723(G:Carbohydrate transport and metabolism)	COG2723(beta-glucosidase)	PF00232.19(Glyco_hydro_1:Glycosyl hydrolase family 1)	sp|Q95X01|MYRO1_BREBR(Myrosinase 1 OS=Brevicoryne brassicae OX=69196 PE=1 SV=1)	114121419
gene-LOC114123363	yes|down	1	gene-LOC114123363	LOC114123363	uncharacterized LOC114123363	658	277	437	299	62	29	27	38.29	59.18	38.99	8.88	4.21	3.66	45.4867	5.58333	0.14769	-2.75935	6.72e-13	9.3e-11	yes	down	XP_027842099.1(uncharacterized protein LOC114123363 [Aphis gossypii])	0	0	0	0	0	0	0	0	114123363
gene-LOC114129924	yes|down	1	gene-LOC114129924	LOC114129924	la protein homolog	1227	21	22	22	2	0	0	1.14	1.18	1.14	0.11	0	0	1.15333	0.0366667	0.0393123	-4.66887	0.000105937	0.00207542	yes	down	XP_027850595.1(la protein homolog [Aphis gossypii])	GO:0005634(cellular_component:nucleus); GO:1990904(cellular_component:ribonucleoprotein complex); GO:0003723(molecular_function:RNA binding); GO:0006396(biological_process:RNA processing); GO:0003677(molecular_function:DNA binding)	K11090	LA, SSB	map05322(Systemic lupus erythematosus)	COG5193(J:Translation, ribosomal structure and biogenesis); COG5193(O:Posttranslational modification, protein turnover, chaperones)	COG5193(La ribonucleoprotein domain family member); COG5193(La ribonucleoprotein domain family member)	PF05383.18(La:La domain); PF00076.23(RRM_1:RNA recognition motif. (a.k.a. RRM, RBD, or RNP domain))	sp|P40796|LA_DROME(La protein homolog OS=Drosophila melanogaster OX=7227 GN=La PE=1 SV=2)	114129924
gene-LOC114121143	yes|down	1	gene-LOC114121143	LOC114121143	zinc finger MYM-type protein 5-like	1301	16	14	7	0	0	0	0.81	0.7	0.34	0	0	0	0.616667	0	0.0196063	-5.67254	0.000172226	0.0030873	yes	down	XP_027839116.1(zinc finger MYM-type protein 5-like [Aphis gossypii])	0	0	0	0	ENOG4111KV5(S:Function unknown); ENOG410XQ1Y(S:Function unknown); ENOG410ZMAV(S:Function unknown)	ENOG4111KV5(-); ENOG410XQ1Y(zinc finger); ENOG410ZMAV(Pfam:hATC)	PF14291.7(DUF4371:Domain of unknown function (DUF4371))	sp|Q5SVZ6|ZMYM1_HUMAN(Zinc finger MYM-type protein 1 OS=Homo sapiens OX=9606 GN=ZMYM1 PE=1 SV=1)	114121143
gene-LOC114125269	yes|up	1	gene-LOC114125269	LOC114125269	uncharacterized LOC114125269	1032	0	0	0	21	25	22	0	0	0	1.5	1.82	1.5	0	1.60667	161.034	7.33123	2.65e-08	1.52e-06	yes	up	XP_027844651.1(uncharacterized protein LOC114125269 [Aphis gossypii])	0	0	0	0	ENOG4111RKA(S:Function unknown); ENOG410ZKAB(S:Function unknown); ENOG410ZMX4(S:Function unknown); ENOG410Y65V(S:Function unknown); ENOG41120A8(S:Function unknown); ENOG410XQYK(S:Function unknown)	ENOG4111RKA(Reverse transcriptase); ENOG410ZKAB(-); ENOG410ZMX4(ZnF_C2HC); ENOG410Y65V(ZnF_C2HC); ENOG41120A8(-); ENOG410XQYK(Reverse transcriptase (RNA-dependent DNA polymerase))	PF13966.7(zf-RVT:zinc-binding in reverse transcriptase)	sp|P16425|Y2R2_DROME(Putative 115 kDa protein in type-1 retrotransposable element R1DM OS=Drosophila melanogaster OX=7227 GN=R1A1-element\ORF2 PE=4 SV=1)	114125269
gene-LOC114127837	yes|down	1	gene-LOC114127837	LOC114127837	uncharacterized LOC114127837	806	17.4	7.69	32.85	0	0	0	1.72	0.75	3.07	0	0	0	1.84667	0	0.0122327	-6.35311	2.96e-05	0.000738844	yes	down	0	0	0	0	0	0	0	0	0	114127837
gene-LOC114131003	yes|up	1	gene-LOC114131003	LOC114131003	transcriptional regulatory protein AlgP-like	823	3	3	2	15	10	18	0.29	0.28	0.18	5.06	5.32	12.02	0.25	7.46667	6.98016	2.80326	0.000357761	0.00556733	yes	up	XP_027851922.1(uncharacterized protein LOC114131003 [Aphis gossypii])	0	0	0	0	0	0	0	0	114131003
gene-LOC114122469	yes|down	1	gene-LOC114122469	LOC114122469	uncharacterized LOC114122469	1028	23	21	11	0	0	0	1.59	1.43	0.72	0	0	0	1.24667	0	0.0131698	-6.24663	1.01e-05	0.000296023	yes	down	XP_027840941.1(uncharacterized protein LOC114122469, partial [Aphis gossypii])	0	0	0	0	ENOG410XQ1Y(S:Function unknown)	ENOG410XQ1Y(zinc finger)	PF14291.7(DUF4371:Domain of unknown function (DUF4371))	0	114122469
gene-LOC114128667	yes|up	1	gene-LOC114128667	LOC114128667	orcokinin peptides type B-like	913	30.63	39.8	7.24	67.54	66.61	87.14	2.5	3.2	0.56	5.74	5.76	7.04	2.08667	6.18	3.74998	1.90688	0.00088949	0.0111372	yes	up	XP_027849039.1(orcokinin peptides type B-like [Aphis gossypii])	GO:0005184(molecular_function:neuropeptide hormone activity)	0	0	0	ENOG410Y4FP(S:Function unknown)	ENOG410Y4FP(-)	0	0	114128667
gene-LOC114123962	yes|down	1	gene-LOC114123962	LOC114123962	probable DNA-directed RNA polymerase III subunit RPC6	1136	220.16	195.56	248.41	11.44	29.35	19.64	11.87	10.43	12.77	0.66	1.69	1.06	11.69	1.13667	0.119081	-3.06998	4.92e-14	7.96e-12	yes	down	XP_027842907.1(probable DNA-directed RNA polymerase III subunit RPC6 [Aphis gossypii])	GO:0003899(molecular_function:DNA-directed RNA polymerase activity); GO:0003677(molecular_function:DNA binding); GO:0006383(biological_process:transcription from RNA polymerase III promoter); GO:0005666(cellular_component:DNA-directed RNA polymerase III complex)	K03025	RPC6, POLR3F	map03020(RNA polymerase); map04623(Cytosolic DNA-sensing pathway)	COG5111(K:Transcription)	COG5111(dna-directed rna polymerase iii subunit)	PF05158.13(RNA_pol_Rpc34:RNA polymerase Rpc34 subunit)	sp|Q9VD25|RPC6_DROME(Probable DNA-directed RNA polymerase III subunit RPC6 OS=Drosophila melanogaster OX=7227 GN=CG5380 PE=2 SV=1)	114123962
gene-LOC114123960	yes|down	1	gene-LOC114123960	LOC114123960	uncharacterized LOC114123960	1593	149.19	129.11	162.93	6.46	0	0	5.83	4.99	6.07	0.26	0	0	5.63	0.0866667	0.0173395	-5.8498	2.51e-16	5.35e-14	yes	down	XP_027842906.1(uncharacterized protein LOC114123960 [Aphis gossypii])	GO:0022857(molecular_function:transmembrane transporter activity); GO:0016021(cellular_component:integral component of membrane)	0	0	0	COG0477(G:Carbohydrate transport and metabolism); ENOG410ZW1J(G:Carbohydrate transport and metabolism); ENOG4110017(G:Carbohydrate transport and metabolism)	COG0477(major facilitator Superfamily); ENOG410ZW1J(Monocarboxylate transporter); ENOG4110017(Major Facilitator Superfamily)	PF07690.17(MFS_1:Major Facilitator Superfamily)	sp|Q7RTX9|MOT14_HUMAN(Monocarboxylate transporter 14 OS=Homo sapiens OX=9606 GN=SLC16A14 PE=2 SV=1)	114123960
gene-LOC114127374	yes|up	1	gene-LOC114127374	LOC114127374	uncharacterized LOC114127374, transcript variant X1	2645	139	85.52	121	229.19	181.34	152.92	5.96	3.64	5.28	9.91	8.04	7.78	4.96	8.57667	2.11191	1.07855	3.95e-05	0.000923554	yes	up	KAE9524832.1(hypothetical protein AGLY_014882 [Aphis glycines])	0	0	0	0	ENOG4110QT9(S:Function unknown); ENOG4111T22(S:Function unknown)	ENOG4110QT9(Pfam:Transposase_37); ENOG4111T22(Pfam:Transposase_37)	0	0	114127374
gene-LOC114120825	yes|up	1	gene-LOC114120825	LOC114120825	uncharacterized LOC114120825	2263	1998.08	2270.23	863.97	2665.05	3674.93	3103.39	23.64	26.67	9.77	33.01	46.38	36.71	20.0267	38.7	2.43839	1.28593	0.000629903	0.00864425	yes	up	XP_027838671.1(uncharacterized protein LOC114120825 [Aphis gossypii])	0	0	0	0	ENOG4111M7J(S:Function unknown)	ENOG4111M7J(Cuticular protein)	PF16619.6(SUIM_assoc:Unstructured region C-term to UIM in Ataxin3)	0	114120825
gene-LOC114120599	yes|down	1	gene-LOC114120599	LOC114120599	uncharacterized LOC114120599, transcript variant X1	2413	220.7	319.55	449.66	104.1	115.32	122.88	5.27	7.57	10.25	2.59	2.93	2.92	7.69667	2.81333	0.444021	-1.1713	0.00112881	0.0134243	yes	down	XP_027838355.1(uncharacterized protein LOC114120599 isoform X1 [Aphis gossypii])	0	K05673	ABCC4	map04024(cAMP signaling pathway); map01523(Antifolate resistance); map02010(ABC transporters); map04976(Bile secretion)	COG0507(L:Replication, recombination and repair)	COG0507(exodeoxyribonuclease v alpha)	0	0	114120599
gene-LOC114128251	yes|down	1	gene-LOC114128251	LOC114128251	putative nuclease HARBI1	657	14	15	22	0	0	0	1.94	2.04	2.88	0	0	0	2.28667	0	0.0139446	-6.16415	1.36e-05	0.000378675	yes	down	XP_027848531.1(putative nuclease HARBI1 [Aphis gossypii])	0	K23222	HARBI1	0	ENOG411206Y(S:Function unknown); ENOG410Z2MW(S:Function unknown); COG0507(S:Function unknown); ENOG410XZQD(S:Function unknown)	ENOG411206Y(transposon protein); ENOG410Z2MW(-); COG0507(transposon protein); ENOG410XZQD(-)	PF04827.15(Plant_tran:Plant transposon protein); PF13359.7(DDE_Tnp_4:DDE superfamily endonuclease); PF13613.7(HTH_Tnp_4:Helix-turn-helix of DDE superfamily endonuclease)	sp|Q6AZB8|HARB1_DANRE(Putative nuclease HARBI1 OS=Danio rerio OX=7955 GN=harbi1 PE=2 SV=1)	114128251
gene-LOC114123886	yes|down	1	gene-LOC114123886	LOC114123886	uncharacterized LOC114123886	547	58.71	84.54	108.94	5.65	10.51	11.78	9.35	11.92	13.92	0.58	1.09	1.14	11.73	0.936667	0.148519	-2.75128	9.99e-08	5.15e-06	yes	down	XP_027842823.1(uncharacterized protein LOC114123886 [Aphis gossypii])	GO:0005576(cellular_component:extracellular region); GO:0006629(biological_process:lipid metabolic process); GO:0052689(molecular_function:carboxylic ester hydrolase activity)	0	0	0	ENOG410YGS3(S:Function unknown)	ENOG410YGS3(pancreatic triacylglycerol lipase)	PF00151.20(Lipase:Lipase)	0	114123886
gene-LOC114124497	yes|up	1	gene-LOC114124497	LOC114124497	uncharacterized LOC114124497	934	0	0	0	51	39	40	0	0	0	4.2	3.26	3.13	0	3.53	304.638	8.25095	4.59e-11	4.51e-09	yes	up	XP_027843557.1(uncharacterized protein LOC114124497 [Aphis gossypii])	0	0	0	0	COG2801(T:Signal transduction mechanisms); ENOG410ZPIR(S:Function unknown); ENOG410ZACE(S:Function unknown); ENOG410ZB2J(S:Function unknown)	COG2801(fibroblast growth factor receptor signaling pathway); ENOG410ZPIR(-); ENOG410ZACE(-); ENOG410ZB2J(-)	PF13873.7(Myb_DNA-bind_5:Myb/SANT-like DNA-binding domain)	0	114124497
gene-LOC114123310	yes|down	1	gene-LOC114123310	LOC114123310	zinc finger SWIM domain-containing protein 6-like	2871	1219.82	881.55	1045.43	416.91	120.45	436.8	24.13	17.33	19.75	8.61	2.53	8.61	20.4033	6.58333	0.396578	-1.33432	0.00223749	0.0227307	yes	down	XP_027842057.1(zinc finger SWIM domain-containing protein 6-like [Aphis gossypii])	GO:0008270(molecular_function:zinc ion binding)	0	0	0	ENOG410XPZG(S:Function unknown)	ENOG410XPZG(Zinc finger, SWIM-type containing)	0	sp|Q80TB7|ZSWM6_MOUSE(Zinc finger SWIM domain-containing protein 6 OS=Mus musculus OX=10090 GN=Zswim6 PE=1 SV=3)	114123310
gene-LOC114123316	yes|down	1	gene-LOC114123316	LOC114123316	probable cyclin-dependent serine/threonine-protein kinase DDB_G0292550	2898	3949	6553	5358	1044	743	383	70.49	118.15	93.56	19.42	13.89	6.54	94.0667	13.2833	0.17376	-2.52483	5.41e-11	5.27e-09	yes	down	XP_027842050.1(LOW QUALITY PROTEIN: probable cyclin-dependent serine/threonine-protein kinase DDB_G0292550 [Aphis gossypii])	0	0	0	0	0	0	0	0	114123316
gene-LOC114132343	yes|up	1	gene-LOC114132343	LOC114132343	thiamine transporter 1-like	1673	35	23	11	167	237	145	1.57	1.02	0.45	6.42	9.33	5.32	1.01333	7.02333	10.6083	3.40712	8.21e-15	1.48e-12	yes	up	XP_027853581.1(thiamine transporter 1-like [Aphis gossypii])	GO:0090482(molecular_function:vitamin transmembrane transporter activity); GO:0016021(cellular_component:integral component of membrane)	K14610	SLC19A2_3, THTR	map04977(Vitamin digestion and absorption)	ENOG410XT34(P:Inorganic ion transport and metabolism); ENOG410XPX0(S:Function unknown)	ENOG410XT34(reduced folate carrier activity); ENOG410XPX0(Kin of IRRE like)	PF01770.19(Folate_carrier:Reduced folate carrier)	sp|Q17766|FOLT1_CAEEL(Folate transporter 1 OS=Caenorhabditis elegans OX=6239 GN=folt-1 PE=2 SV=3)	114132343
gene-LOC114132616	yes|up	1	gene-LOC114132616	LOC114132616	methionine adenosyltransferase 2 subunit beta-like	1324	189	248	219	310	352	355	10.42	12.89	11.09	16.58	19.29	18.05	11.4667	17.9733	2.01571	1.01129	2.54e-05	0.000642596	yes	up	XP_027853932.1(methionine adenosyltransferase 2 subunit beta-like [Aphis gossypii])	0	K00789	metK	map00270(Cysteine and methionine metabolism); map01240(Biosynthesis of cofactors)	COG1091(M:Cell wall/membrane/envelope biogenesis)	COG1091(Dtdp-4-dehydrorhamnose reductase)	PF04321.18(RmlD_sub_bind:RmlD substrate binding domain); PF01370.22(Epimerase:NAD dependent epimerase/dehydratase family); PF16363.6(GDP_Man_Dehyd:GDP-mannose 4,6 dehydratase); PF07993.13(NAD_binding_4:Male sterility protein); PF02719.16(Polysacc_synt_2:Polysaccharide biosynthesis protein)	sp|Q99LB6|MAT2B_MOUSE(Methionine adenosyltransferase 2 subunit beta OS=Mus musculus OX=10090 GN=Mat2b PE=1 SV=1)	114132616
gene-LOC114124947	yes|down	1	gene-LOC114124947	LOC114124947	leucine-rich repeat-containing G-protein coupled receptor 4-like	1800	248	223	161	71	86	76	8.36	7.45	5.18	2.5	3.09	2.55	6.99667	2.71333	0.484595	-1.04515	8.13e-05	0.00166961	yes	down	XP_027844200.1(leucine-rich repeat-containing G-protein coupled receptor 4-like [Aphis gossypii])	0	0	0	0	COG4886(U:Intracellular trafficking, secretion, and vesicular transport)	COG4886(Adaptor-related protein complex 3, delta 1 subunit)	PF13855.7(LRR_8:Leucine rich repeat); PF13306.7(LRR_5:BspA type Leucine rich repeat region (6 copies)); PF12799.8(LRR_4:Leucine Rich repeats (2 copies))	0	114124947
gene-LOC114120504	yes|up	1	gene-LOC114120504	LOC114120504	cuticle protein 8-like	624	80	150	89	142	143	226	12.18	22.34	12.77	22.37	22.84	33.65	15.7633	26.2867	2.07785	1.05509	0.00623717	0.0493651	yes	up	XP_027838225.1(cuticle protein 8-like [Aphis gossypii])	GO:0042302(molecular_function:structural constituent of cuticle)	0	0	0	ENOG410YXZN(S:Function unknown); ENOG410YXTN(S:Function unknown)	ENOG410YXZN(Cuticular protein); ENOG410YXTN(Cuticular protein)	PF00379.24(Chitin_bind_4:Insect cuticle protein)	sp|P11734|CU08_LOCMI(Cuticle protein 8 OS=Locusta migratoria OX=7004 PE=1 SV=1)	114120504
gene-LOC114121669	yes|up	1	gene-LOC114121669	LOC114121669	uncharacterized LOC114121669	1179	6	5	1	22	23	15	0.34	0.28	0.05	1.31	1.4	0.85	0.223333	1.18667	6.57677	2.71738	0.000161971	0.00293795	yes	up	XP_027839896.1(uncharacterized protein LOC114121669 [Aphis gossypii])	0	0	0	0	ENOG410XTMJ(S:Function unknown)	ENOG410XTMJ(Pfam:DDE)	PF10545.10(MADF_DNA_bdg:Alcohol dehydrogenase transcription factor Myb/SANT-like); PF02944.21(BESS:BESS motif)	0	114121669
gene-LOC114121668	yes|up	1	gene-LOC114121668	LOC114121668	protein ALP1-like	1294	49	42	15	102	173	52	2.48	2.11	0.72	5.4	9.31	2.62	1.77	5.77667	4.1275	2.04527	0.000518561	0.00738051	yes	up	XP_027839895.1(protein ALP1-like [Aphis gossypii])	0	0	0	0	ENOG411206Y(S:Function unknown)	ENOG411206Y(transposon protein)	PF13359.7(DDE_Tnp_4:DDE superfamily endonuclease); PF04827.15(Plant_tran:Plant transposon protein)	0	114121668
gene-LOC114129815	yes|up	1	gene-LOC114129815	LOC114129815	uncharacterized LOC114129815	1977	972	861.15	360	1067	2211	1916.43	29.34	25.76	10.36	33.66	71.03	57.66	21.82	54.1167	3.18758	1.67246	0.000147293	0.0027295	yes	up	XP_027850461.1(uncharacterized protein LOC114129815 [Aphis gossypii])	0	0	0	0	ENOG410Y7ID(S:Function unknown); ENOG41117T3(S:Function unknown)	ENOG410Y7ID(-); ENOG41117T3(-)	PF00100.24(Zona_pellucida:Zona pellucida-like domain)	0	114129815
gene-LOC114132586	yes|up	1	gene-LOC114132586	LOC114132586	uncharacterized LOC114132586	1471	2705	744	691	2661	3640	2361	116.6	31.74	28.37	119.77	166.76	101.25	58.9033	129.26	2.84497	1.50842	0.00292165	0.0280458	yes	up	XP_027853889.1(uncharacterized protein LOC114132586 [Aphis gossypii])	GO:0016021(cellular_component:integral component of membrane)	0	0	0	ENOG410XWAF(S:Function unknown)	ENOG410XWAF(-)	PF07898.14(DUF1676:Protein of unknown function (DUF1676))	0	114132586
gene-LOC114123569	yes|down	1	gene-LOC114123569	LOC114123569	proton-coupled amino acid transporter-like protein pathetic, transcript variant X1	2116	1339	977	506	125	103	442	36.75	26.52	13.19	3.61	3.04	11.99	25.4867	6.21333	0.316785	-1.65842	0.00500244	0.0420219	yes	down	XP_027842397.1(proton-coupled amino acid transporter-like protein pathetic isoform X1 [Aphis gossypii])	GO:0016021(cellular_component:integral component of membrane)	K14209	SLC36A, PAT	map04974(Protein digestion and absorption)	COG0814(Q:Secondary metabolites biosynthesis, transport and catabolism)	COG0814(Cytochrome p450)	PF01490.19(Aa_trans:Transmembrane amino acid transporter protein)	sp|Q9VT04|PATH_DROME(Proton-coupled amino acid transporter-like protein pathetic OS=Drosophila melanogaster OX=7227 GN=path PE=1 SV=1)	114123569
gene-LOC114123704	yes|up	1	gene-LOC114123704	LOC114123704	folate transporter 1-like, transcript variant X1	2392	503	182	176	469	963	924	17.73	6.43	6.03	17.39	36.62	32.92	10.0633	28.9767	3.72935	1.89892	8.05e-05	0.00165534	yes	up	XP_027842570.1(folate transporter 1-like isoform X1 [Aphis gossypii])	GO:0090482(molecular_function:vitamin transmembrane transporter activity); GO:0016021(cellular_component:integral component of membrane)	K14610	SLC19A2_3, THTR	map04977(Vitamin digestion and absorption)	ENOG410XT34(P:Inorganic ion transport and metabolism); ENOG410XPX0(S:Function unknown)	ENOG410XT34(reduced folate carrier activity); ENOG410XPX0(Kin of IRRE like)	PF01770.19(Folate_carrier:Reduced folate carrier); PF07690.17(MFS_1:Major Facilitator Superfamily)	sp|Q9BZV2|S19A3_HUMAN(Thiamine transporter 2 OS=Homo sapiens OX=9606 GN=SLC19A3 PE=1 SV=1)	114123704
gene-LOC114125705	yes|down	1	gene-LOC114125705	LOC114125705	cilia- and flagella-associated protein 52-like	1374	28	40	15.07	4	4	7	1.31	1.86	0.67	0.2	0.2	0.33	1.28	0.243333	0.236196	-2.08194	0.00259262	0.0254178	yes	down	XP_027845272.1(cilia- and flagella-associated protein 52-like, partial [Aphis gossypii])	0	K24728	CFAP52, WDR16	0	ENOG410XP3K(S:Function unknown); ENOG410Y19E(S:Function unknown)	ENOG410XP3K(THAP domain containing 9); ENOG410Y19E(WD repeat domain 16)	PF00400.33(WD40:WD domain, G-beta repeat)	sp|Q5F201|CFA52_MOUSE(Cilia- and flagella-associated protein 52 OS=Mus musculus OX=10090 GN=Cfap52 PE=1 SV=1)	114125705
gene-LOC114124690	yes|up	1	gene-LOC114124690	LOC114124690	eukaryotic translation initiation factor 4 gamma 2-like, transcript variant X1	2906	986.5	960.33	810.54	2863.14	2175.2	2160.55	17.12	16.44	13.46	67.47	51.88	48.78	15.6733	56.0433	3.37889	1.75655	4.32e-33	3.11e-30	yes	up	KAF0762487.1(eukaryotic translation initiation factor 4 gamma 2 isoform X1 [Aphis craccivora])	GO:0003723(molecular_function:RNA binding)	K03260	EIF4G	map05416(Viral myocarditis)	ENOG410ZIZB(J:Translation, ribosomal structure and biogenesis)	ENOG410ZIZB(Eukaryotic translation initiation factor 4 gamma)	PF02854.20(MIF4G:MIF4G domain); PF02020.19(W2:eIF4-gamma/eIF5/eIF2-epsilon)	sp|Q95L46|IF4G2_BOVIN(Eukaryotic translation initiation factor 4 gamma 2 OS=Bos taurus OX=9913 GN=EIF4G2 PE=2 SV=2)	114124690
gene-LOC114123818	yes|down	1	gene-LOC114123818	LOC114123818	proto-oncogene tyrosine-protein kinase receptor Ret	2407	61	73	68	31	15	18	1.47	1.74	1.56	0.78	0.38	0.43	1.59	0.53	0.405075	-1.30374	0.000742657	0.00970517	yes	down	XP_027842719.1(proto-oncogene tyrosine-protein kinase receptor Ret [Aphis gossypii])	GO:0016021(cellular_component:integral component of membrane); GO:0004713(molecular_function:protein tyrosine kinase activity); GO:0005524(molecular_function:ATP binding)	K05126	RET	map05216(Thyroid cancer); map04020(Calcium signaling pathway); map05230(Central carbon metabolism in cancer); map05223(Non-small cell lung cancer); map05200(Pathways in cancer)	COG0515(S:Function unknown)	COG0515(UDP-N-acetyl-alpha-D-galactosamine polypeptide N-acetylgalactosaminyltransferase)	PF07714.18(PK_Tyr_Ser-Thr:Protein tyrosine and serine/threonine kinase); PF00069.26(Pkinase:Protein kinase domain)	sp|P35546|RET_MOUSE(Proto-oncogene tyrosine-protein kinase receptor Ret OS=Mus musculus OX=10090 GN=Ret PE=1 SV=2)	114123818
gene-LOC114125422	yes|down	1	gene-LOC114125422	LOC114125422	uncharacterized LOC114125422	2083	37.08	28.11	18.06	7.02	5.02	8.07	1.05	0.79	0.49	0.21	0.15	0.23	0.776667	0.196667	0.315741	-1.66319	0.0042612	0.0374361	yes	down	KAE9521827.1(hypothetical protein AGLY_017779 [Aphis glycines])	0	K11976	RNF216, TRIAD3	0	ENOG410XS1H(S:Function unknown)	ENOG410XS1H(RING finger) protein)	PF01485.22(IBR:IBR domain, a half RING-finger domain)	sp|Q9NWF9|RN216_HUMAN(E3 ubiquitin-protein ligase RNF216 OS=Homo sapiens OX=9606 GN=RNF216 PE=1 SV=3)	114125422
gene-LOC114120282	yes|up	1	gene-LOC114120282	LOC114120282	uncharacterized LOC114120282, transcript variant X3	2322	135.12	102.09	108.42	299.76	246.45	274.87	4.22	2.77	3.02	14.81	12.21	12.02	3.33667	13.0133	3.09673	1.63075	1.32e-18	3.71e-16	yes	up	XP_027837948.1(uncharacterized protein LOC114120282 isoform X2 [Aphis gossypii])	0	0	0	0	ENOG4111V7I(S:Function unknown); COG1599(S:Function unknown)	ENOG4111V7I(-); COG1599(-)	PF01336.26(tRNA_anti-codon:OB-fold nucleic acid binding domain)	0	114120282
gene-LOC114120285	yes|up	1	gene-LOC114120285	LOC114120285	uncharacterized LOC114120285	732	11	3	2.62	105.24	43.58	42.13	1.27	0.34	0.29	12.57	5.29	4.77	0.633333	7.54333	14.5259	3.86056	3.95e-09	2.69e-07	yes	up	KAE9527377.1(hypothetical protein AGLY_013075 [Aphis glycines])	0	0	0	0	0	0	0	0	114120285
gene-LOC114131834	yes|up	1	gene-LOC114131834	LOC114131834	cytochrome P450 4C1-like	1657	16.37	35.83	37.51	63.89	127.04	190.75	3.94	19.35	18.9	5.71	2.95	9.29	14.0633	5.98333	5.53294	2.46805	1.15e-05	0.000335113	yes	up	XP_027852945.1(LOW QUALITY PROTEIN: cytochrome P450 4C1-like [Aphis gossypii])	0	K15001	CYP4	0	COG2124(Q:Secondary metabolites biosynthesis, transport and catabolism)	COG2124(Cytochrome p450)	PF00067.23(p450:Cytochrome P450)	sp|P29981|CP4C1_BLADI(Cytochrome P450 4C1 OS=Blaberus discoidalis OX=6981 GN=CYP4C1 PE=2 SV=1)	114131834
gene-LOC114131833	yes|up	1	gene-LOC114131833	LOC114131833	uncharacterized LOC114131833	3078	361.32	422.68	430.68	733	651.88	524.13	16.12	17.52	18.44	29.99	27.81	19.41	17.36	25.7367	2.02617	1.01875	1.91e-06	6.95e-05	yes	up	XP_027852944.1(uncharacterized protein LOC114131833 [Aphis gossypii])	GO:0042302(molecular_function:structural constituent of cuticle)	0	0	0	ENOG4111M49(S:Function unknown)	ENOG4111M49(-)	PF00379.24(Chitin_bind_4:Insect cuticle protein)	0	114131833
gene-LOC114129223	yes|down	1	gene-LOC114129223	LOC114129223	uncharacterized LOC114129223, transcript variant X1	1594	503.06	535.8	624.25	195.89	186.48	196.88	37.22	34.51	42.1	14.51	12.96	13.12	37.9433	13.53	0.450469	-1.1505	3.83e-08	2.13e-06	yes	down	XP_027849684.1(uncharacterized protein LOC114129223 [Aphis gossypii])	GO:0016021(cellular_component:integral component of membrane)	0	0	0	0	0	0	0	114129223
gene-LOC114131238	yes|down	1	gene-LOC114131238	LOC114131238	protein ALP1-like	649	14	10	11	0	0	0	1.98	1.39	1.47	0	0	0	1.61333	0	0.0206018	-5.60109	0.000150488	0.00276456	yes	down	XP_027852213.1(protein ALP1-like, partial [Aphis gossypii])	0	0	0	0	ENOG411206Y(S:Function unknown)	ENOG411206Y(transposon protein)	PF13359.7(DDE_Tnp_4:DDE superfamily endonuclease); PF04827.15(Plant_tran:Plant transposon protein)	0	114131238
gene-LOC114126879	yes|down	1	gene-LOC114126879	LOC114126879	uncharacterized LOC114126879	1818	2176	3894	2303	1393	810	488	72.5	128.55	73.17	48.5	28.72	16.2	91.4067	31.14	0.406807	-1.29758	0.00147064	0.0163938	yes	down	KAE9530607.1(hypothetical protein AGLY_011069 [Aphis glycines])	0	0	0	0	0	0	0	0	114126879
gene-LOC114119640	yes|up	1	gene-LOC114119640	LOC114119640	0	729	0	3	0	10	11	14	0	0.34	0	1.2	1.34	1.6	0.113333	1.38	15.1226	3.91863	0.00119693	0.0139773	yes	up	KAE9533126.1(hypothetical protein AGLY_009554 [Aphis glycines])	GO:0003824(molecular_function:catalytic activity); GO:0016853(molecular_function:isomerase activity)	K13238	ECI1, DCI	map00071(Fatty acid degradation)	COG1024(I:Lipid transport and metabolism); ENOG410YFAM(S:Function unknown)	COG1024(Enoyl-CoA hydratase); ENOG410YFAM(Enoyl-CoA hydratase)	0	sp|P42125|ECI1_MOUSE(Enoyl-CoA delta isomerase 1, mitochondrial OS=Mus musculus OX=10090 GN=Eci1 PE=1 SV=2)	114119640
gene-LOC114122147	yes|down	1	gene-LOC114122147	LOC114122147	cytochrome P450 4C1-like	1786	12	16	36	2	0	0	0.41	0.54	1.17	0.07	0	0	0.706667	0.0233333	0.0388605	-4.68555	0.000469259	0.00679566	yes	down	XP_027840519.1(cytochrome P450 4C1-like [Aphis gossypii])	GO:0005506(molecular_function:iron ion binding); GO:0016705(molecular_function:oxidoreductase activity, acting on paired donors, with incorporation or reduction of molecular oxygen); GO:0004497(molecular_function:monooxygenase activity); GO:0020037(molecular_function:heme binding)	K15001	CYP4	0	COG2124(Q:Secondary metabolites biosynthesis, transport and catabolism)	COG2124(Cytochrome p450)	PF00067.23(p450:Cytochrome P450)	sp|P29981|CP4C1_BLADI(Cytochrome P450 4C1 OS=Blaberus discoidalis OX=6981 GN=CYP4C1 PE=2 SV=1)	114122147
gene-LOC114119868	yes|up	1	gene-LOC114119868	LOC114119868	lactase-phlorizin hydrolase-like	2453	2901.93	6132.31	4745.53	22849.1	30496.7	21599.1	68.49	143.43	106.77	563.12	765.83	508.08	106.23	612.343	7.03528	2.81461	3e-15	5.75e-13	yes	up	XP_027837388.1(lactase-phlorizin hydrolase-like [Aphis gossypii])	GO:0005975(biological_process:carbohydrate metabolic process); GO:0004553(molecular_function:hydrolase activity, hydrolyzing O-glycosyl compounds)	0	0	0	COG2723(G:Carbohydrate transport and metabolism)	COG2723(beta-glucosidase)	PF00232.19(Glyco_hydro_1:Glycosyl hydrolase family 1); PF00150.19(Cellulase:Cellulase (glycosyl hydrolase family 5))	sp|Q95X01|MYRO1_BREBR(Myrosinase 1 OS=Brevicoryne brassicae OX=69196 PE=1 SV=1)	114119868
gene-LOC114121369	yes|down	1	gene-LOC114121369	LOC114121369	neutral alpha-glucosidase AB	3579	14447	13261	10412	2891	2572	1947	223.66	203.8	153.97	46.84	42.46	30.12	193.81	39.8067	0.253072	-1.98238	3.79e-23	1.45e-20	yes	down	XP_027839470.1(neutral alpha-glucosidase AB [Aphis gossypii])	GO:0005975(biological_process:carbohydrate metabolic process); GO:0030246(molecular_function:carbohydrate binding); GO:0004553(molecular_function:hydrolase activity, hydrolyzing O-glycosyl compounds)	K05546	GANAB	map00510(N-Glycan biosynthesis); map04141(Protein processing in endoplasmic reticulum)	COG1501(G:Carbohydrate transport and metabolism)	COG1501(hydrolase, family 31)	PF01055.27(Glyco_hydro_31:Glycosyl hydrolases family 31); PF13802.7(Gal_mutarotas_2:Galactose mutarotase-like)	sp|Q8BHN3|GANAB_MOUSE(Neutral alpha-glucosidase AB OS=Mus musculus OX=10090 GN=Ganab PE=1 SV=1)	114121369
gene-LOC114120215	yes|down	1	gene-LOC114120215	LOC114120215	trimethylguanosine synthase-like	1570	113.27	117.74	75.36	24.47	2.16	14.89	4.36	4.5	2.77	0.93	0.08	0.54	3.87667	0.516667	0.169567	-2.56007	5.17e-05	0.00114564	yes	down	XP_027837857.1(trimethylguanosine synthase-like [Aphis gossypii])	GO:0008168(molecular_function:methyltransferase activity); GO:0009452(biological_process:7-methylguanosine RNA capping); GO:0001510(biological_process:RNA methylation)	K14292	TGS1	0	ENOG410XRUD(S:Function unknown)	ENOG410XRUD(trimethylguanosine synthase)	PF09445.11(Methyltransf_15:RNA cap guanine-N2 methyltransferase); PF13847.7(Methyltransf_31:Methyltransferase domain); PF01170.19(UPF0020:Putative RNA methylase family UPF0020); PF13649.7(Methyltransf_25:Methyltransferase domain); PF02475.17(Met_10:Met-10+ like-protein); PF03602.16(Cons_hypoth95:Conserved hypothetical protein 95); PF08241.13(Methyltransf_11:Methyltransferase domain)	sp|P85107|TGS1_RAT(Trimethylguanosine synthase OS=Rattus norvegicus OX=10116 GN=Tgs1 PE=1 SV=1)	114120215
gene-LOC114122142	yes|down	1	gene-LOC114122142	LOC114122142	serine/threonine-protein kinase MAK-like, transcript variant X1	2075	57	39	29	17	9	12	1.94	1.2	0.79	0.64	0.34	0.34	1.31	0.44	0.395871	-1.3369	0.00502996	0.0421002	yes	down	XP_027840514.1(serine/threonine-protein kinase MAK-like isoform X1 [Aphis gossypii])	GO:0004674(molecular_function:protein serine/threonine kinase activity); GO:0005524(molecular_function:ATP binding)	K08829;K08828	MAK;ICK	0	ENOG410XPBB(T:Signal transduction mechanisms)	ENOG410XPBB(Male germ cell-associated kinase)	PF00069.26(Pkinase:Protein kinase domain); PF07714.18(PK_Tyr_Ser-Thr:Protein tyrosine and serine/threonine kinase)	sp|Q04859|MAK_MOUSE(Serine/threonine-protein kinase MAK OS=Mus musculus OX=10090 GN=Mak PE=1 SV=2)	114122142
gene-LOC114132538	yes|up	1	gene-LOC114132538	LOC114132538	uncharacterized LOC114132538	1543	1445	329	251	1438	2460.33	1161	58.71	13.23	9.72	61.02	106.27	46.95	27.22	71.4133	3.44191	1.78321	0.00404178	0.0358369	yes	up	XP_027853823.1(uncharacterized protein LOC114132538 [Aphis gossypii])	GO:0016021(cellular_component:integral component of membrane)	0	0	0	ENOG4111HTI(S:Function unknown)	ENOG4111HTI(Protein of unknown function (DUF1676))	PF07898.14(DUF1676:Protein of unknown function (DUF1676))	0	114132538
gene-LOC114124251	yes|up	1	gene-LOC114124251	LOC114124251	heat shock protein 70 A1-like	2278	226	497	606	2841.5	338.67	3030.75	5.79	12.62	14.81	76.1	9.24	77.44	11.0733	54.26	5.80094	2.53629	0.000244517	0.00409905	yes	up	XP_027843240.1(heat shock protein 70 A1-like [Aphis gossypii])	GO:0005524(molecular_function:ATP binding)	K03283	HSPA1s	map05162(Measles); map05145(Toxoplasmosis); map04915(Estrogen signaling pathway); map04010(MAPK signaling pathway); map03040(Spliceosome); map05134(Legionellosis); map04213(Longevity regulating pathway - multiple species); map05417(Lipid and atherosclerosis); map04144(Endocytosis); map04612(Antigen processing and presentation); map04141(Protein processing in endoplasmic reticulum); map05020(Prion…	COG0443(U:Intracellular trafficking, secretion, and vesicular transport)	COG0443(Nucleoporin like 1)	PF00012.21(HSP70:Hsp70 protein); PF06723.14(MreB_Mbl:MreB/Mbl protein)	sp|P41825|HSP71_ANOAL(Heat shock protein 70 A1 OS=Anopheles albimanus OX=7167 GN=HSP70A1 PE=3 SV=1)	114124251
gene-LOC114131332	yes|up	1	gene-LOC114131332	LOC114131332	uncharacterized LOC114131332	102	0	0	0	12.54	3.57	6.24	0	0	0	5.12	1.46	2.36	0	2.98	52.7098	5.72	0.000458404	0.00667297	yes	up	KAF0750574.1(Uncharacterized protein FWK35_00018864 [Aphis craccivora])	0	0	0	0	0	0	0	0	114131332
gene-LOC114121561	yes|down	1	gene-LOC114121561	LOC114121561	protein unc-93 homolog A	2949	225	194	191	84	58	89	4.31	3.69	3.49	1.68	1.18	1.7	3.83	1.52	0.49141	-1.025	1.16e-05	0.000337045	yes	down	XP_027839773.1(protein unc-93 homolog A [Aphis gossypii])	GO:0016021(cellular_component:integral component of membrane)	0	0	0	ENOG4110Y8I(S:Function unknown)	ENOG4110Y8I(-)	0	sp|Q9Y115|UN93L_DROME(UNC93-like protein OS=Drosophila melanogaster OX=7227 GN=CG4928 PE=2 SV=1)	114121561
gene-LOC114131336	yes|up	1	gene-LOC114131336	LOC114131336	protein mab-21-like	2502	1630.96	1196.93	1124.83	1778.86	2626.96	1593.24	37.38	27.13	24.62	39.98	58.75	34.38	29.71	44.37	2.01071	1.0077	0.000378501	0.00579595	yes	up	KAE9534438.1(hypothetical protein AGLY_008528 [Aphis glycines])	0	0	0	0	ENOG410XNRJ(O:Posttranslational modification, protein turnover, chaperones)	ENOG410XNRJ(C. elegans)	PF03281.15(Mab-21:Mab-21 protein)	sp|Q5TW90|MAB21_ANOGA(Protein mab-21 OS=Anopheles gambiae OX=7165 GN=mab-21 PE=3 SV=3)	114131336
gene-LOC114122261	yes|up	1	gene-LOC114122261	LOC114122261	retinaldehyde-binding protein 1, transcript variant X1	1188	436	747	401	894	1208	924	25.65	43.77	22.56	55.26	75.97	54.36	30.66	61.8633	2.49481	1.31893	7.81e-05	0.00163301	yes	up	XP_027840668.1(retinaldehyde-binding protein 1 isoform X1 [Aphis gossypii])	0	0	0	0	ENOG410XRSQ(S:Function unknown)	ENOG410XRSQ(-)	PF00650.21(CRAL_TRIO:CRAL/TRIO domain); PF03765.16(CRAL_TRIO_N:CRAL/TRIO, N-terminal domain)	sp|E1C1U1|RLBP1_CHICK(Retinaldehyde-binding protein 1 OS=Gallus gallus OX=9031 GN=RLBP1 PE=1 SV=1)	114122261
gene-LOC114130203	yes|down	1	gene-LOC114130203	LOC114130203	uncharacterized LOC114130203	649	10	18	28	1	0	3	1.42	2.5	3.74	0.15	0	0.42	2.55333	0.19	0.090834	-3.46062	0.00157607	0.0173112	yes	down	XP_027850923.1(uncharacterized protein LOC114130203 [Aphis gossypii])	GO:0016021(cellular_component:integral component of membrane)	0	0	0	0	0	0	0	114130203
gene-LOC114130750	yes|up	1	gene-LOC114130750	LOC114130750	lipase 3-like	2310	0	0	0	62.94	37.44	51.83	0	0	0	1.19	0.71	0.92	0	0.94	354.54	8.4698	1.56e-11	1.61e-09	yes	up	XP_027851601.1(lipase 3-like [Aphis gossypii])	GO:0016787(molecular_function:hydrolase activity); GO:0006629(biological_process:lipid metabolic process)	K01052	LIPA	map04979(Cholesterol metabolism); map04142(Lysosome); map00100(Steroid biosynthesis)	COG0596(S:Function unknown)	COG0596(Alpha beta hydrolase)	PF04083.17(Abhydro_lipase:Partial alpha/beta-hydrolase lipase region); PF00561.21(Abhydrolase_1:alpha/beta hydrolase fold); PF12146.9(Hydrolase_4:Serine aminopeptidase, S33)	sp|O46108|LIP3_DROME(Lipase 3 OS=Drosophila melanogaster OX=7227 GN=Lip3 PE=2 SV=1)	114130750
gene-LOC114130207	yes|up	1	gene-LOC114130207	LOC114130207	general odorant-binding protein 70	1209	258	293	84	407	411.26	434	12.73	12.69	3.62	23.52	23.86	23.87	9.68	23.75	2.59901	1.37796	0.0013889	0.0157519	yes	up	XP_027850927.1(general odorant-binding protein 70 [Aphis gossypii])	GO:0005549(molecular_function:odorant binding)	0	0	0	ENOG4112235(S:Function unknown)	ENOG4112235(-)	PF01395.23(PBP_GOBP:PBP/GOBP family)	sp|Q7Q5L4|OBP70_ANOGA(General odorant-binding protein 70 OS=Anopheles gambiae OX=7165 GN=Obp70 PE=3 SV=2)	114130207
[truncated: 162 more rows]

## Sheet: DEGs wth signal peptides
seq_id	Cu_vs_Ma	sum	gene_id	gene_name	description	length	Cu_1_count	Cu_2_count	Cu_3_count	Ma_1_count	Ma_2_count	Ma_3_count	Cu_1_tpm	Cu_2_tpm	Cu_3_tpm	Ma_1_tpm	Ma_2_tpm	Ma_3_tpm	Cu_tpm	Ma_tpm	fc	log2fc	pvalue	padjust	significant	regulate	nr	go	KO_id	KO_name	paths	cog	cog_description	pfam	swissprot	entrez
[truncated: 201 more rows]

## Sheet: DEGs with transmembrane domains
seq_id	Cu_vs_Ma	sum	gene_id	gene_name	description	length	Cu_1_count	Cu_2_count	Cu_3_count	Ma_1_count	Ma_2_count	Ma_3_count	Cu_1_tpm	Cu_2_tpm	Cu_3_tpm	Ma_1_tpm	Ma_2_tpm	Ma_3_tpm	Cu_tpm	Ma_tpm	fc	log2fc	pvalue	padjust	significant	regulate	nr	go	KO_id	KO_name	paths	cog	cog_description	pfam	swissprot	entrez
[truncated: 191 more rows]

[truncated: 1 more sheets: secreted DEGs (139)]
