# Supplementary material for: A Method for Identification of Biotype-Specific Salivary Effector Candidates of Aphid
Source: Insects. 2023 Sep 13;14(9):760. doi: 10.3390/insects14090760 (PMC10532216; doi:10.3390/insects14090760)
Supplement: Supplementary file 1 [file insects-14-00760-s001.zip › Table S3 Biotype-specific effector candidates from aphid-head transcriptome.xlsx]

## Sheet: DEGs(523)
Gene_name	Description	Length	MA_1_count	MA_2_count	MA_3_count	CU_1_count	CU_2_count	CU_3_count	MA_1_tpm	MA_2_tpm	MA_3_tpm	CU_1_tpm	CU_2_tpm	CU_3_tpm	MA_tpm	CU_tpm	FC	Log2fc	p-value	p-adjust	Significant	Regulation	nr	go	KO_id	KO_name	paths	cog	cog_description	pfam	swissprot	entrez
LOC114121118	uncharacterized LOC114121118	1442	35.43	37.6	38.93	0	0	0	1.54	1.43	1.85	0	0	0	1.60667	0	0.00447424	-7.80414	8.05e-10	5.13e-08	yes	down	KAE9544007.1(hypothetical protein AGLY_001696 [Aphis glycines])	GO:0007165(biological_process:signal transduction)	0	0	0	ENOG410ZR0G(S:Function unknown)	ENOG410ZR0G(signal transduction)	0	0	114121118
LOC114128105	uncharacterized LOC114128105	1015	63	85	51	35	30	32	4.37	5.1	3.83	2.28	2.07	2.26	4.43333	2.20333	0.447271	-1.16078	0.000621642	0.0093792	yes	down	KAE9525485.1(hypothetical protein AGLY_014285 [Aphis glycines])	GO:0016021(cellular_component:integral component of membrane)	0	0	0	ENOG4111NA0(S:Function unknown)	ENOG4111NA0(-)	0	0	114128105
LOC114129495	endochitinase A-like	2656	41408	49997	43426	17956	19550	20352	875.61	930.17	1005.65	358.38	412.29	439.46	937.143	403.377	0.39053	-1.35649	7.68e-49	8.8e-46	yes	down	XP_027850048.1(endochitinase A-like [Aphis gossypii])	0	0	0	0	0	0	0	0	114129495
LOC114126370	uncharacterized LOC114126370, transcript variant X1	1455	5	2	0	15	25	24	0.22	0.08	0	0.61	1.23	1.05	0.1	0.963333	8.14059	3.02513	0.000507884	0.00791154	yes	up	XP_027846108.1(uncharacterized protein LOC114126370 isoform X1 [Aphis gossypii])	GO:0016021(cellular_component:integral component of membrane); GO:0032222(biological_process:regulation of synaptic transmission, cholinergic); GO:1903818(biological_process:positive regulation of voltage-gated potassium channel activity); GO:0030431(biological_process:sleep)	0	0	0	ENOG410ZM5G(S:Function unknown)	ENOG410ZM5G(-)	PF13927.7(Ig_3:Immunoglobulin domain); PF00047.26(ig:Immunoglobulin domain); PF07679.17(I-set:Immunoglobulin I-set domain); PF13895.7(Ig_2:Immunoglobulin domain)	0	114126370
LOC114120099	cytochrome c oxidase assembly protein COX20, mitochondrial	779	149	197	126	767	939	564	15.36	17.38	13.97	74.12	96.05	59.21	15.57	76.46	4.4299	2.14727	4.05e-18	6.21e-16	yes	up	XP_027837702.1(cytochrome c oxidase assembly protein COX20, mitochondrial [Aphis gossypii])	GO:0005743(cellular_component:mitochondrial inner membrane); GO:0033617(biological_process:mitochondrial respiratory chain complex IV assembly); GO:0016021(cellular_component:integral component of membrane)	K18184	COX20	map04714(Thermogenesis)	ENOG4111Y8F(S:Function unknown)	ENOG4111Y8F(COX20 Cox2 chaperone homolog (S. cerevisiae))	PF12597.9(DUF3767:Protein of unknown function (DUF3767))	sp|Q9D7J4|COX20_MOUSE(Cytochrome c oxidase assembly protein COX20, mitochondrial OS=Mus musculus OX=10090 GN=Cox20 PE=1 SV=1)	114120099
LOC114132304	myeloblastin-like	903	0	0	0	20	30	21	0	0	0	1.35	1.94	1.24	0	1.51	116.808	6.86799	2.88e-07	1.14e-05	yes	up	XP_027853513.1(myeloblastin-like [Aphis gossypii])	GO:0004252(molecular_function:serine-type endopeptidase activity)	0	0	0	COG5640(O:Posttranslational modification, protein turnover, chaperones)	COG5640(protease)	PF00089.27(Trypsin:Trypsin); PF13365.7(Trypsin_2:Trypsin-like peptidase domain)	sp|Q61096|PRTN3_MOUSE(Myeloblastin OS=Mus musculus OX=10090 GN=Prtn3 PE=1 SV=2)	114132304
LOC114119498	cytochrome P450 6a8-like	1789	18	21.77	10	5	4	1	0.6	0.64	0.36	0.16	0.13	0.03	0.533333	0.106667	0.18541	-2.43121	0.00275262	0.0318454	yes	down	QIU80512.1(cytochrome P450 monooxygenase CYP6CYx [Aphis gossypii])	GO:0005506(molecular_function:iron ion binding); GO:0016705(molecular_function:oxidoreductase activity, acting on paired donors, with incorporation or reduction of molecular oxygen); GO:0004497(molecular_function:monooxygenase activity); GO:0020037(molecular_function:heme binding)	K14999	CYP6	0	COG2124(Q:Secondary metabolites biosynthesis, transport and catabolism)	COG2124(Cytochrome p450)	0	sp|Q27593|CP6A8_DROME(Cytochrome P450 6a8 OS=Drosophila melanogaster OX=7227 GN=Cyp6a8 PE=2 SV=2)	114119498
LOC114131989	glucose dehydrogenase [FAD, quinone]-like	1846	524.08	469.89	482.02	304.58	128.61	212.65	16.87	13.26	16.95	9.24	4.13	6.99	15.6933	6.78667	0.400568	-1.31988	1.67e-05	0.000435977	yes	down	XP_027853157.1(glucose dehydrogenase [FAD, quinone]-like [Aphis gossypii])	GO:0050660(molecular_function:flavin adenine dinucleotide binding); GO:0016614(molecular_function:oxidoreductase activity, acting on CH-OH group of donors)	0	0	0	COG2303(E:Amino acid transport and metabolism)	COG2303(oxidoreductase)	PF00732.20(GMC_oxred_N:GMC oxidoreductase); PF05199.14(GMC_oxred_C:GMC oxidoreductase)	sp|P18173|DHGL_DROME(Glucose dehydrogenase [FAD, quinone] OS=Drosophila melanogaster OX=7227 GN=Gld PE=3 SV=3)	114131989
LOC114119136	ATP-dependent DNA helicase PIF1-like	2130	83.55	64.16	88.69	0	0	5.44	2.28	1.53	2.65	0	0	0.15	2.15333	0.05	0.0187461	-5.73727	8.87e-14	8.93e-12	yes	down	XP_027836417.1(ATP-dependent DNA helicase PIF1-like [Aphis gossypii])	GO:0006310(biological_process:DNA recombination); GO:0000723(biological_process:telomere maintenance); GO:0000002(biological_process:mitochondrial genome maintenance); GO:0006281(biological_process:DNA repair); GO:0005634(cellular_component:nucleus); GO:0005739(cellular_component:mitochondrion); GO:0003677(molecular_function:DNA binding); GO:0003678(molecular_function:DNA helicase activity); GO:0…	K15255	PIF1	0	COG0507(L:Replication, recombination and repair)	COG0507(exodeoxyribonuclease v alpha)	PF05970.15(PIF1:PIF1-like helicase); PF13604.7(AAA_30:AAA domain); PF13245.7(AAA_19:AAA domain); PF01443.19(Viral_helicase1:Viral (Superfamily 1) RNA helicase); PF13538.7(UvrD_C_2:UvrD-like helicase C-terminal domain); PF13401.7(AAA_22:AAA domain); PF02562.17(PhoH:PhoH-like protein); PF00004.30(AAA:ATPase family associated with various cellular activities (AAA))	sp|Q7ZV90|PIF1_DANRE(ATP-dependent DNA helicase PIF1 OS=Danio rerio OX=7955 GN=pif1 PE=2 SV=1)	114119136
LOC114127709	uncharacterized LOC114127709	418	1	0	5.02	19.12	26.21	46.2	0.39	0	1.57	2.48	3.6	6.53	0.653333	4.20333	13.4064	3.74485	2.15e-05	0.00054135	yes	up	KAE9542808.1(hypothetical protein AGLY_002719 [Aphis glycines])	0	0	0	0	ENOG410YVAS(U:Intracellular trafficking, secretion, and vesicular transport)	ENOG410YVAS(melanoma inhibitory activity family, member 3)	0	0	114127709
LOC114125865	AF4/FMR2 family member 4-like	1106	6.31	33.84	27.2	0	0	0	0.39	1.81	1.82	0	0	0	1.34	0	0.00772108	-7.01698	9.33e-07	3.32e-05	yes	down	XP_027845457.1(AF4/FMR2 family member 4-like, partial [Aphis gossypii])	0	0	0	0	ENOG410Y545(S:Function unknown)	ENOG410Y545(-)	0	0	114125865
LOC114131958	glucose dehydrogenase [FAD, quinone]-like, transcript variant X2	2581	607	520	417	1203	1737	1389	13.5	10.19	10.16	25.35	38.67	31.67	11.2833	31.8967	2.52613	1.33693	2.52e-10	1.73e-08	yes	up	XP_027853117.1(glucose dehydrogenase [FAD, quinone]-like [Aphis gossypii])	GO:0016021(cellular_component:integral component of membrane); GO:0050660(molecular_function:flavin adenine dinucleotide binding); GO:0016614(molecular_function:oxidoreductase activity, acting on CH-OH group of donors)	0	0	0	COG2303(E:Amino acid transport and metabolism)	COG2303(oxidoreductase)	PF00732.20(GMC_oxred_N:GMC oxidoreductase); PF05199.14(GMC_oxred_C:GMC oxidoreductase); PF00890.25(FAD_binding_2:FAD binding domain); PF01266.25(DAO:FAD dependent oxidoreductase)	sp|P18173|DHGL_DROME(Glucose dehydrogenase [FAD, quinone] OS=Drosophila melanogaster OX=7227 GN=Gld PE=3 SV=3)	114131958
LOC114119195	uncharacterized LOC114119195	1188	6	10	5	0	0	0	0.34	0.49	0.3	0	0	0	0.376667	0	0.0242336	-5.36685	0.000949782	0.013527	yes	down	XP_027836488.1(uncharacterized protein LOC114119195 [Aphis gossypii])	0	0	0	0	COG2801(L:Replication, recombination and repair); ENOG410YP2D(S:Function unknown)	COG2801(Retrotransposon protein); ENOG410YP2D(Integrase core domain protein)	PF05380.14(Peptidase_A17:Pao retrotransposon peptidase)	0	114119195
LOC114121633	glyoxylate reductase/hydroxypyruvate reductase-like, transcript variant X1	1359	262	326	422	14	11	29	11.06	12.09	20.14	0.62	0.53	1.34	14.43	0.83	0.048185	-4.37527	1.06e-37	5.77e-35	yes	down	XP_027839847.1(glyoxylate reductase/hydroxypyruvate reductase-like isoform X1 [Aphis gossypii])	GO:0051287(molecular_function:NAD binding); GO:0016616(molecular_function:oxidoreductase activity, acting on the CH-OH group of donors, NAD or NADP as acceptor)	K00049	GRHPR	map00630(Glyoxylate and dicarboxylate metabolism); map00260(Glycine, serine and threonine metabolism); map00620(Pyruvate metabolism)	COG1052(C:Energy production and conversion); COG0190(H:Coenzyme transport and metabolism)	COG1052(Dehydrogenase); COG0190(Catalyzes the oxidation of 5,10- methylenetetrahydrofolate to 5,10-methenyltetrahydrofolate and then the hydrolysis of 5,10-methenyltetrahydrofolate to 10- formyltetrahydrofolate (By similarity))	PF02826.20(2-Hacid_dh_C:D-isomer specific 2-hydroxyacid dehydrogenase, NAD binding domain); PF00389.31(2-Hacid_dh:D-isomer specific 2-hydroxyacid dehydrogenase, catalytic domain); PF03446.16(NAD_binding_2:NAD binding domain of 6-phosphogluconate dehydrogenase); PF07991.13(IlvN:Acetohydroxy acid isomeroreductase, NADPH-binding domain); PF00670.22(AdoHcyase_NAD:S-adenosyl-L-homocysteine hydrolase, …	sp|Q91Z53|GRHPR_MOUSE(Glyoxylate reductase/hydroxypyruvate reductase OS=Mus musculus OX=10090 GN=Grhpr PE=1 SV=1)	114121633
LOC114122908	uncharacterized protein DDB_G0287625-like, transcript variant X1	1274	130.33	407.79	284.6	442.12	625.81	722.88	6.65	18.13	15.82	21.25	31.81	37.65	13.5333	30.2367	2.01218	1.00876	0.00121258	0.0164913	yes	up	XP_027841502.1(uncharacterized protein DDB_G0287625-like isoform X1 [Aphis gossypii])	0	K18749	LSM14, RAP55, SCD6	0	ENOG41122RA(S:Function unknown)	ENOG41122RA(LSM14A, SCD6 homolog A (S. cerevisiae))	PF09532.11(FDF:FDF domain)	sp|Q498K9|L14BB_XENLA(Protein LSM14 homolog B-B OS=Xenopus laevis OX=8355 GN=lsm14b-b PE=1 SV=1)	114122908
LOC114127698	UDP-glucuronosyltransferase 2B2-like	1733	976.82	1323.1	950.44	469.36	512.05	504.33	33.91	40.22	36.03	15.36	17.71	17.87	36.72	16.98	0.418082	-1.25814	2.51e-18	4.05e-16	yes	down	XP_027847824.1(UDP-glucuronosyltransferase 2B2-like [Aphis gossypii])	GO:0015020(molecular_function:glucuronosyltransferase activity); GO:0016021(cellular_component:integral component of membrane)	K00699	UGT	map05204(Chemical carcinogenesis); map00983(Drug metabolism - other enzymes); map00982(Drug metabolism - cytochrome P450); map00980(Metabolism of xenobiotics by cytochrome P450); map00040(Pentose and glucuronate interconversions); map00860(Porphyrin and chlorophyll metabolism); map00053(Ascorbate and aldarate metabolism); map00830(Retinol metabolism); map00140(Steroid hormone biosynthesis)	COG1819(S:Function unknown)	COG1819(Transferase)	PF00201.19(UDPGT:UDP-glucoronosyl and UDP-glucosyl transferase); PF04101.17(Glyco_tran_28_C:Glycosyltransferase family 28 C-terminal domain)	sp|P08541|UD2B2_RAT(UDP-glucuronosyltransferase 2B2 OS=Rattus norvegicus OX=10116 GN=Ugt2b PE=1 SV=1)	114127698
LOC114128917	peptidyl-prolyl cis-trans isomerase FKBP62-like	1296	102.82	108.3	79.3	29.26	18.57	50.74	5.13	4.7	4.3	1.37	0.92	2.58	4.71	1.62333	0.307399	-1.70182	5.77e-06	0.000173621	yes	down	XP_027849327.1(peptidyl-prolyl cis-trans isomerase FKBP62-like [Aphis gossypii])	0	K20097	FKBPL	0	COG0457(U:Intracellular trafficking, secretion, and vesicular transport); ENOG41127QX(S:Function unknown); COG0545(S:Function unknown)	COG0457(scavenger receptor class B, member); ENOG41127QX(-); COG0545(-)	PF07719.18(TPR_2:Tetratricopeptide repeat); PF00515.29(TPR_1:Tetratricopeptide repeat)	sp|Q9FJL3|FKB65_ARATH(Peptidyl-prolyl cis-trans isomerase FKBP65 OS=Arabidopsis thaliana OX=3702 GN=FKBP65 PE=1 SV=1)	114128917
LOC114125044	uncharacterized LOC114125044, transcript variant X1	601	208	236	268	657	777	460	33.9	32.25	46.35	99.84	125.12	76.16	37.5	100.373	2.43404	1.28335	1.51e-07	6.32e-06	yes	up	AGE97636.1(odorant binding protein 6 [Aphis gossypii])	GO:0005549(molecular_function:odorant binding)	0	0	0	ENOG410ZH43(S:Function unknown); ENOG41118W2(S:Function unknown)	ENOG410ZH43(Odorant-binding protein); ENOG41118W2(odorant-binding protein 58c)	PF01395.23(PBP_GOBP:PBP/GOBP family)	0	114125044
LOC114128189	uncharacterized LOC114128189	897	1	1	6.01	19.85	25	11	0.08	0.07	0.54	1.55	2.06	0.93	0.23	1.51333	6.38166	2.67393	0.00294858	0.033738	yes	up	XP_027848440.1(maltase 2-like [Aphis gossypii])	GO:0003824(molecular_function:catalytic activity); GO:0005975(biological_process:carbohydrate metabolic process)	0	0	0	COG0366(G:Carbohydrate transport and metabolism)	COG0366(alpha amylase, catalytic)	0	sp|O16099|MAL2_DROVI(Maltase 2 OS=Drosophila virilis OX=7244 GN=Mal-B2 PE=3 SV=2)	114128189
LOC114125359	uncharacterized LOC114125359	649	216.33	354.86	275.54	51.31	82.89	182.31	30.49	42.24	41.41	6.75	11.56	26.12	38.0467	14.81	0.334927	-1.57808	1.58e-05	0.000415754	yes	down	XP_027844775.1(uncharacterized protein LOC114125359 [Aphis gossypii])	0	0	0	0	COG1501(G:Carbohydrate transport and metabolism)	COG1501(hydrolase, family 31)	0	0	114125359
LOC114120903	cuticle protein 63-like	554	402	1479	345	48348	10959	184	77.32	236.3	69.96	8649.94	2078.81	35.92	127.86	3588.22	26.9468	4.75204	0.00299181	0.0340288	yes	up	XP_027838791.1(cuticle protein 63-like [Aphis gossypii])	0	0	0	0	0	0	0	0	114120903
LOC114129833	esterase E4-like	1978	784.91	977.25	971.79	372.64	432.71	361.87	24.23	26.53	32.95	10.74	13.18	11.18	27.9033	11.7	0.389736	-1.35943	5.61e-18	8.36e-16	yes	down	XP_027850482.1(esterase E4-like [Aphis gossypii])	GO:0016787(molecular_function:hydrolase activity); GO:0080030(molecular_function:methyl indole-3-acetate esterase activity)	0	0	0	COG2272(I:Lipid transport and metabolism)	COG2272(Carboxylesterase)	PF00135.29(COesterase:Carboxylesterase family); PF07859.14(Abhydrolase_3:alpha/beta hydrolase fold)	sp|P35502|ESTF_MYZPE(Esterase FE4 OS=Myzus persicae OX=13164 PE=1 SV=1)	114129833
LOC114119367	chorion peroxidase-like	2509	841	392	555	247	110	237	18.96	7.77	13.7	5.26	2.47	5.46	13.4767	4.39667	0.295614	-1.75821	2.27e-06	7.47e-05	yes	down	XP_027836693.1(chorion peroxidase-like [Aphis gossypii])	GO:0004601(molecular_function:peroxidase activity); GO:0020037(molecular_function:heme binding); GO:0006979(biological_process:response to oxidative stress)	K19511	PXDN, VPO1	0	ENOG410XPZ3(S:Function unknown)	ENOG410XPZ3(Zinc finger protein)	PF03098.16(An_peroxidase:Animal haem peroxidase)	sp|A4IGL7|PXDN_XENTR(Peroxidasin OS=Xenopus tropicalis OX=8364 GN=pxdn PE=2 SV=1)	114119367
LOC114128955	UDP-glucuronosyltransferase 2B2-like	1938	5274	7933	5013	2075	1979	2175	159.76	210.69	165.91	59.36	59.81	67.31	178.787	62.16	0.314474	-1.66899	2.03e-25	5.68e-23	yes	down	XP_027849370.1(UDP-glucuronosyltransferase 2B2-like [Aphis gossypii])	GO:0015020(molecular_function:glucuronosyltransferase activity); GO:0016021(cellular_component:integral component of membrane)	K00699	UGT	map05204(Chemical carcinogenesis); map00983(Drug metabolism - other enzymes); map00982(Drug metabolism - cytochrome P450); map00980(Metabolism of xenobiotics by cytochrome P450); map00040(Pentose and glucuronate interconversions); map00860(Porphyrin and chlorophyll metabolism); map00053(Ascorbate and aldarate metabolism); map00830(Retinol metabolism); map00140(Steroid hormone biosynthesis)	COG1819(S:Function unknown)	COG1819(Transferase)	PF00201.19(UDPGT:UDP-glucoronosyl and UDP-glucosyl transferase)	sp|P08541|UD2B2_RAT(UDP-glucuronosyltransferase 2B2 OS=Rattus norvegicus OX=10116 GN=Ugt2b PE=1 SV=1)	114128955
LOC114133090	heat shock protein 70 A1-like	2242	192.12	238.62	264.96	65.96	127.2	74.06	4.93	5.37	7.43	1.6	3.25	1.94	5.91	2.26333	0.348524	-1.52067	8.65e-08	3.84e-06	yes	down	XP_027854502.1(heat shock protein 70 A1-like [Aphis gossypii])	GO:0005524(molecular_function:ATP binding)	K03283	HSPA1s	map05162(Measles); map05145(Toxoplasmosis); map04010(MAPK signaling pathway); map03040(Spliceosome); map05134(Legionellosis); map04612(Antigen processing and presentation); map04213(Longevity regulating pathway - multiple species); map04144(Endocytosis); map04915(Estrogen signaling pathway); map04141(Protein processing in endoplasmic reticulum)	COG0443(O:Posttranslational modification, protein turnover, chaperones)	COG0443(Heat shock protein)	PF00012.21(HSP70:Hsp70 protein); PF06723.14(MreB_Mbl:MreB/Mbl protein)	sp|P41825|HSP71_ANOAL(Heat shock protein 70 A1 OS=Anopheles albimanus OX=7167 GN=HSP70A1 PE=3 SV=1)	114133090
LOC114123935	probable DNA-directed RNA polymerase III subunit RPC6	1110	479.75	428.7	308.62	17.65	27.23	17.83	29.38	22.78	20.52	1.02	1.66	1.11	24.2267	1.26333	0.0467545	-4.41875	5.94e-47	4.54e-44	yes	down	XP_027842876.1(probable DNA-directed RNA polymerase III subunit RPC6 [Aphis gossypii])	GO:0003899(molecular_function:DNA-directed RNA polymerase activity); GO:0003677(molecular_function:DNA binding); GO:0006383(biological_process:transcription from RNA polymerase III promoter); GO:0005666(cellular_component:DNA-directed RNA polymerase III complex)	K03025	RPC6, POLR3F	map03020(RNA polymerase); map04623(Cytosolic DNA-sensing pathway)	COG5111(K:Transcription)	COG5111(dna-directed rna polymerase iii subunit)	PF05158.13(RNA_pol_Rpc34:RNA polymerase Rpc34 subunit)	sp|Q9VD25|RPC6_DROME(Probable DNA-directed RNA polymerase III subunit RPC6 OS=Drosophila melanogaster OX=7227 GN=CG5380 PE=2 SV=1)	114123935
LOC114130585	uncharacterized LOC114130585	1119	13	13	12	0	0	0	0.79	0.68	0.79	0	0	0	0.753333	0	0.0131692	-6.24669	1.21e-05	0.00033308	yes	down	XP_027851389.1(uncharacterized protein LOC114130585 [Aphis gossypii])	GO:0005634(cellular_component:nucleus); GO:0003677(molecular_function:DNA binding)	0	0	0	ENOG410XTMJ(S:Function unknown); ENOG410XRA9(S:Function unknown)	ENOG410XTMJ(-); ENOG410XRA9(Alcohol dehydrogenase transcription factor Myb/SANT-like)	PF10545.10(MADF_DNA_bdg:Alcohol dehydrogenase transcription factor Myb/SANT-like); PF02944.21(BESS:BESS motif)	0	114130585
LOC114127461	uncharacterized LOC114127461	813	1	5	1	47	36	12	0.1	0.41	0.1	4.25	3.44	1.18	0.203333	2.95667	12.9536	3.69528	2.96e-05	0.000720888	yes	up	XP_027847502.1(uncharacterized protein LOC114127461, partial [Aphis gossypii])	GO:0003964(molecular_function:RNA-directed DNA polymerase activity); GO:0004519(molecular_function:endonuclease activity); GO:0004527(molecular_function:exonuclease activity); GO:0008270(molecular_function:zinc ion binding); GO:0003676(molecular_function:nucleic acid binding)	0	0	0	ENOG41120A8(S:Function unknown); ENOG41112V0(S:Function unknown); ENOG410YRUW(S:Function unknown); ENOG410ZMPH(S:Function unknown); ENOG410YMB3(S:Function unknown); ENOG41113CD(S:Function unknown); ENOG4111RKA(S:Function unknown)	ENOG41120A8(-); ENOG41112V0(Pfam:RnaseH); ENOG410YRUW(reverse transcriptase); ENOG410ZMPH(-); ENOG410YMB3(-); ENOG41113CD(-); ENOG4111RKA(-)	PF14529.7(Exo_endo_phos_2:Endonuclease-reverse transcriptase); PF03372.24(Exo_endo_phos:Endonuclease/Exonuclease/phosphatase family)	0	114127461
LOC114127450	uncharacterized LOC114127450	295	348.02	828	890.36	352	177	469.03	506.91	831.98	1104.56	447.1	237.95	676.39	814.483	453.813	0.443865	-1.17181	0.00129301	0.0173791	yes	down	KAF0772052.1(Uncharacterized protein FWK35_00005487 [Aphis craccivora])	0	0	0	0	0	0	0	0	114127450
LOC114129677	leucine repeat adapter protein 25-like	1060	17.24	11.78	25.74	1169.27	1090.72	1350.49	0.96	0.57	1.77	71.51	70.67	89.76	1.1	77.3133	59.3792	5.89189	1.46e-109	1.67e-105	yes	up	KAE9536503.1(hypothetical protein AGLY_007292 [Aphis glycines])	GO:0016021(cellular_component:integral component of membrane); GO:0004842(molecular_function:ubiquitin-protein transferase activity); GO:0005680(cellular_component:anaphase-promoting complex)	K03358	APC11	map04110(Cell cycle); map04914(Progesterone-mediated oocyte maturation); map04114(Oocyte meiosis); map05166(Human T-cell leukemia virus 1 infection); map04120(Ubiquitin mediated proteolysis)	COG5194(O:Posttranslational modification, protein turnover, chaperones)	COG5194(protein ubiquitination)	PF14854.7(LURAP:Leucine rich adaptor protein); PF15039.7(DUF4530:Domain of unknown function (DUF4530))	sp|Q9CPX9|APC11_MOUSE(Anaphase-promoting complex subunit 11 OS=Mus musculus OX=10090 GN=Anapc11 PE=3 SV=1)	114129677
LOC114128244	uncharacterized LOC114128244	1054	4	9	3	24	23	33	0.26	0.51	0.21	1.48	1.5	2.21	0.326667	1.73	4.59311	2.19947	0.000495452	0.00776006	yes	up	KAE9523061.1(hypothetical protein AGLY_016543 [Aphis glycines])	0	0	0	0	ENOG41117KI(S:Function unknown)	ENOG41117KI(-)	0	0	114128244
LOC114125132	eyes absent homolog 1-like	1288	4085	9287	5417	4739	2753	2234	183.62	366.6	266.45	222.73	136.62	113.81	272.223	157.72	0.49112	-1.02585	0.00135886	0.0181366	yes	down	XP_027844448.1(eyes absent homolog 1-like [Aphis gossypii])	0	0	0	0	0	0	0	0	114125132
LOC114129054	uncharacterized LOC114129054	516	1084.21	792.67	933.4	438.08	494.08	440.21	243.87	146.62	219.74	91.41	109.36	100.37	203.41	100.38	0.4387	-1.18869	8.92e-09	4.73e-07	yes	down	XP_027849485.1(uncharacterized protein LOC114129054 [Aphis gossypii])	0	0	0	0	ENOG4111KMK(S:Function unknown)	ENOG4111KMK(ZM)	0	0	114129054
LOC114119532	xanthine dehydrogenase	4131	48	57	52	109	113	146	0.62	0.65	0.74	1.34	1.47	1.94	0.67	1.58333	2.12547	1.08778	2.07e-05	0.000523267	yes	up	XP_027836913.1(xanthine dehydrogenase [Aphis gossypii])	GO:0043546(molecular_function:molybdopterin cofactor binding); GO:0051537(molecular_function:2 iron, 2 sulfur cluster binding); GO:0004855(molecular_function:xanthine oxidase activity); GO:0004854(molecular_function:xanthine dehydrogenase activity); GO:0005506(molecular_function:iron ion binding); GO:0016491(molecular_function:oxidoreductase activity); GO:0071949(molecular_function:FAD binding); …	K00106	XDH	map04146(Peroxisome); map00983(Drug metabolism - other enzymes); map00230(Purine metabolism); map00232(Caffeine metabolism)	COG4630(S:Function unknown)	COG4630(-)	PF02738.19(Ald_Xan_dh_C2:Molybdopterin-binding domain of aldehyde dehydrogenase); PF00941.22(FAD_binding_5:FAD binding domain in molybdopterin dehydrogenase); PF01315.23(Ald_Xan_dh_C:Aldehyde oxidase and xanthine dehydrogenase, a/b hammerhead domain); PF01799.21(Fer2_2:[2Fe-2S] binding domain); PF03450.18(CO_deh_flav_C:CO dehydrogenase flavoprotein C-terminal domain); PF00111.28(Fer2:2Fe-2S iron-…	sp|P10351|XDH_DROME(Xanthine dehydrogenase OS=Drosophila melanogaster OX=7227 GN=ry PE=2 SV=2)	114119532
LOC114125186	astacin-like	1380	842	558	662	266	151	132	38.18	22.09	32.61	11.4	6.78	6.09	30.96	8.09	0.242453	-2.04422	2.86e-10	1.95e-08	yes	down	XP_027844523.1(astacin-like [Aphis gossypii])	GO:0004222(molecular_function:metalloendopeptidase activity); GO:0008270(molecular_function:zinc ion binding)	0	0	0	ENOG410ZPX7(O:Posttranslational modification, protein turnover, chaperones)	ENOG410ZPX7(Meprin A)	PF01400.25(Astacin:Astacin (Peptidase family M12A))	sp|Q19269|NAS14_CAEEL(Zinc metalloproteinase nas-14 OS=Caenorhabditis elegans OX=6239 GN=nas-14 PE=2 SV=2)	114125186
LOC114122309	arginine/serine-rich coiled-coil protein 2-like	1739	34.17	41.45	54.47	20.57	23.44	19.17	2.98	3.33	4.88	2.75	3.32	2.79	3.73	2.95333	0.444549	-1.16959	0.00419628	0.0438963	yes	down	XP_027840729.1(arginine/serine-rich coiled-coil protein 2-like [Aphis gossypii])	0	K13156	SNRNP48	0	ENOG4111HUN(S:Function unknown)	ENOG4111HUN(RNA splicing)	PF05485.13(THAP:THAP domain)	sp|Q6IEG0|SNR48_HUMAN(U11/U12 small nuclear ribonucleoprotein 48 kDa protein OS=Homo sapiens OX=9606 GN=SNRNP48 PE=1 SV=2)	114122309
LOC114119413	uncharacterized LOC114119413	2412	17	39	18	0	0	0	0.4	0.81	0.46	0	0	0	0.556667	0	0.00693903	-7.17105	9.86e-08	4.36e-06	yes	down	XP_027836763.1(uncharacterized protein LOC114119413, partial [Aphis gossypii])	0	0	0	0	COG2801(L:Replication, recombination and repair); ENOG410YP2D(S:Function unknown); ENOG410Y7Q4(S:Function unknown); ENOG410YHBQ(S:Function unknown); ENOG4112AZ8(S:Function unknown)	COG2801(Retrotransposon protein); ENOG410YP2D(Integrase core domain protein); ENOG410Y7Q4(-); ENOG410YHBQ(-); ENOG4112AZ8(-)	PF05380.14(Peptidase_A17:Pao retrotransposon peptidase); PF00078.28(RVT_1:Reverse transcriptase (RNA-dependent DNA polymerase)); PF05585.13(DUF1758:Putative peptidase (DUF1758))	0	114119413
LOC114119989	farnesol dehydrogenase-like, transcript variant X1	1121	608.66	801.25	450.11	105.63	86.31	142	33.68	36.66	24.7	5.07	4.66	6.55	31.68	5.42667	0.163827	-2.60975	1.61e-26	4.72e-24	yes	down	XP_027837547.1(farnesol dehydrogenase-like [Aphis gossypii])	GO:0016491(molecular_function:oxidoreductase activity)	K15890	FOHSDR	map00981(Insect hormone biosynthesis); map00900(Terpenoid backbone biosynthesis)	COG4221(S:Function unknown); COG1028(S:Function unknown)	COG4221(serine 3-dehydrogenase activity); COG1028(Dehydrogenase reductase)	PF00106.26(adh_short:short chain dehydrogenase); PF13561.7(adh_short_C2:Enoyl-(Acyl carrier protein) reductase); PF08659.11(KR:KR domain); PF01370.22(Epimerase:NAD dependent epimerase/dehydratase family)	sp|D2WKD9|SDR1_AEDAE(Farnesol dehydrogenase OS=Aedes aegypti OX=7159 GN=SDR-1 PE=1 SV=2)	114119989
LOC114132787	sorting and assembly machinery component 50 homolog	1925	237	498	238	932	870	351	7.21	13.2	7.91	26.55	26.36	10.92	9.44	21.2767	2.09707	1.06837	0.00438317	0.0452702	yes	up	XP_027854160.1(sorting and assembly machinery component 50 homolog [Aphis gossypii])	GO:0019867(cellular_component:outer membrane)	K07277	SAM50, TOB55, bamA	0	COG4775(M:Cell wall/membrane/envelope biogenesis)	COG4775(Gram-negative-bacterium-type cell outer membrane assembly)	PF01103.24(Omp85:Omp85 superfamily domain); PF07244.16(POTRA:Surface antigen variable number repeat)	sp|Q9Y512|SAM50_HUMAN(Sorting and assembly machinery component 50 homolog OS=Homo sapiens OX=9606 GN=SAMM50 PE=1 SV=3)	114132787
LOC114123552	uncharacterized LOC114123552	1035	203	99	191	76	51	29	13.82	5.84	14.11	4.85	3.44	2.02	11.2567	3.43667	0.286463	-1.80358	3.68e-05	0.000874268	yes	down	XP_027842368.1(uncharacterized protein LOC114123552 [Aphis gossypii])	GO:0016021(cellular_component:integral component of membrane)	0	0	0	0	0	0	0	114123552
LOC114129185	bestrophin-2-like	822	0	0	0	65	117	77	0	0	0	2.21	4.17	3.42	0	3.26667	425.133	8.73177	2.12e-12	1.87e-10	yes	up	XP_027849640.1(bestrophin-2-like [Aphis gossypii])	GO:0016021(cellular_component:integral component of membrane)	K22204	BEST	0	ENOG410XS3J(S:Function unknown)	ENOG410XS3J(HIG1 hypoxia inducible domain family, member)	PF01062.22(Bestrophin:Bestrophin, RFP-TM, chloride channel)	sp|Q8N1M1|BEST3_HUMAN(Bestrophin-3 OS=Homo sapiens OX=9606 GN=BEST3 PE=1 SV=1)	114129185
LOC114118975	pendrin-like, transcript variant X1	2254	4269.73	6906.1	3136.41	2742.73	1932.61	2860.24	101.08	145.87	81.53	61.7	45.21	69.54	109.493	58.8167	0.487169	-1.03751	3.74e-05	0.000883775	yes	down	XP_027836220.1(pendrin-like isoform X1 [Aphis gossypii])	0	K14453	K14453	0	COG0659(P:Inorganic ion transport and metabolism)	COG0659(sulfate transporter)	PF00916.21(Sulfate_transp:Sulfate permease family); PF01740.22(STAS:STAS domain)	sp|Q99NH7|S26A5_MOUSE(Prestin OS=Mus musculus OX=10090 GN=Slc26a5 PE=2 SV=3)	114118975
LOC114119210	hepatic triacylglycerol lipase-like, transcript variant X1	1476	126	111	99	5	8	3	8.01	6.31	6.83	0.3	0.55	0.2	7.05	0.35	0.0430858	-4.53664	1.4e-21	2.91e-19	yes	down	XP_027836503.1(lipase member H-B-like isoform X1 [Aphis gossypii])	GO:0005576(cellular_component:extracellular region); GO:0006629(biological_process:lipid metabolic process); GO:0052689(molecular_function:carboxylic ester hydrolase activity)	K22283	LIPC	map04979(Cholesterol metabolism); map00561(Glycerolipid metabolism)	ENOG4111JY5(S:Function unknown)	ENOG4111JY5(Lipase)	PF00151.20(Lipase:Lipase)	sp|Q641F6|LIPHB_XENLA(Lipase member H-B OS=Xenopus laevis OX=8355 GN=liph-b PE=2 SV=1)	114119210
LOC114128301	uncharacterized LOC114128301	662	961	747.33	922	186.33	101	73.67	130.65	85.95	133.8	23.68	13.59	10.18	116.8	15.8167	0.12596	-2.98896	6.88e-19	1.21e-16	yes	down	XP_027848585.1(uncharacterized protein LOC114128301 [Aphis gossypii])	0	0	0	0	0	0	0	0	114128301
LOC114131417	V-type proton ATPase subunit G	600	7458	8034	6606	3982	3875	3992	1219.42	1101.24	1146.04	607.07	626.03	663.05	1155.57	632.05	0.487974	-1.03512	1.44e-15	1.73e-13	yes	down	NP_001119628.1(vacuolar ATP synthase subunit G-like protein [Acyrthosiphon pisum])	GO:1902600(biological_process:hydrogen ion transmembrane transport); GO:0042626(molecular_function:ATPase activity, coupled to transmembrane movement of substances); GO:0016471(cellular_component:vacuolar proton-transporting V-type ATPase complex)	K02152	ATPeV1G, ATP6G	map05323(Rheumatoid arthritis); map00190(Oxidative phosphorylation); map04966(Collecting duct acid secretion); map05120(Epithelial cell signaling in Helicobacter pylori infection); map05165(Human papillomavirus infection); map04145(Phagosome); map04150(mTOR signaling pathway); map04721(Synaptic vesicle cycle); map05110(Vibrio cholerae infection)	ENOG4111XX0(C:Energy production and conversion)	ENOG4111XX0(ATPase, H transporting, lysosomal 13kDa, V1 subunit)	PF03179.16(V-ATPase_G:Vacuolar (H+)-ATPase G subunit)	sp|Q25532|VATG_MANSE(V-type proton ATPase subunit G OS=Manduca sexta OX=7130 PE=3 SV=1)	114131417
LOC114132041	uncharacterized LOC114132041	2804	0	0	0	19	20	22	0	0	0	0.36	0.4	0.45	0	0.403333	100.242	6.64734	8.61e-07	3.09e-05	yes	up	XP_027853218.1(uncharacterized protein LOC114132041 [Aphis gossypii])	0	0	0	0	COG0457(P:Inorganic ion transport and metabolism); COG2801(L:Replication, recombination and repair); ENOG410XZQD(L:Replication, recombination and repair); ENOG411206Y(S:Function unknown); ENOG410YABW(S:Function unknown)	COG0457(Transporter); COG2801(Retrotransposon protein); ENOG410XZQD(Retrotransposon protein); ENOG411206Y(transposon protein); ENOG410YABW(Reverse transcriptase (RNA-dependent DNA polymerase))	PF13424.7(TPR_12:Tetratricopeptide repeat); PF13374.7(TPR_10:Tetratricopeptide repeat)	sp|Q5U538|HARB1_XENLA(Putative nuclease HARBI1 OS=Xenopus laevis OX=8355 GN=harbi1 PE=2 SV=1)	114132041
LOC114125129	uncharacterized LOC114125129, transcript variant X1	2590	3288.82	2356.05	4240.9	1630.46	1738.38	1699	96.2	59.86	136.22	43.56	49.49	48.31	97.4267	47.12	0.459411	-1.12214	2.27e-06	7.47e-05	yes	down	XP_027844441.1(uncharacterized protein LOC114125129 isoform X1 [Aphis gossypii])	0	0	0	0	0	0	PF15999.6(DUF4774:Domain of unknown function (DUF4774))	0	114125129
LOC114127476	uncharacterized LOC114127476	1272	58	73	89	19	22	21	3.84	4.5	7.54	1.29	1.7	1.28	5.29333	1.42333	0.256142	-1.96498	4.2e-08	2.01e-06	yes	down	XP_027847519.1(uncharacterized protein LOC114127476 [Aphis gossypii])	0	0	0	0	0	0	0	0	114127476
LOC114127596	anaphase-promoting complex subunit 4-like	1306	531	776	632	1268	1465	2150	26.22	33.38	33.96	58.95	72.01	108.29	31.1867	79.75	2.28377	1.19142	2.96e-10	2.01e-08	yes	up	XP_027847681.1(anaphase-promoting complex subunit 4-like [Aphis gossypii])	GO:0007050(biological_process:cell cycle arrest); GO:0004861(molecular_function:cyclin-dependent protein serine/threonine kinase inhibitor activity); GO:0005634(cellular_component:nucleus)	0	0	0	0	0	PF02234.20(CDI:Cyclin-dependent kinase inhibitor)	0	114127596
LOC114121830	uncharacterized LOC114121830	670	358	326	219	985	1006	870	44.16	35.01	28.83	119.56	126.38	114.15	36	120.03	2.8798	1.52597	8.1e-12	6.68e-10	yes	up	XP_027840110.1(uncharacterized protein LOC114121830 [Aphis gossypii])	0	0	0	0	ENOG410Y7NC(S:Function unknown); ENOG41120FQ(S:Function unknown); ENOG410Z6E3(S:Function unknown); ENOG410Y8DA(S:Function unknown)	ENOG410Y7NC(-); ENOG41120FQ(-); ENOG410Z6E3(-); ENOG410Y8DA(Juvenile hormone-inducible protein)	0	0	114121830
LOC114119382	uncharacterized LOC114119382	2252	49	84	66	365	411	503	1.25	1.88	1.84	8.79	10.45	13.1	1.65667	10.78	5.86203	2.5514	6.64e-33	2.71e-30	yes	up	XP_027836711.1(uncharacterized protein LOC114119382 [Aphis gossypii])	GO:0016274(molecular_function:protein-arginine N-methyltransferase activity)	K05931	CARM1, PRMT4	map01522(Endocrine resistance)	ENOG410XPDD(K:Transcription)	ENOG410XPDD(Coactivator-associated arginine methyltransferase 1)	0	sp|B4JXV2|CARM1_DROGR(Histone-arginine methyltransferase CARMER OS=Drosophila grimshawi OX=7222 GN=Art4 PE=3 SV=1)	114119382
LOC114125345	fatty acid synthase-like, transcript variant X1	6555	215	357	518	1057	883	1526	2.59	3.74	8.06	15.25	12.36	20.83	4.79667	16.1467	2.88473	1.52844	1.88e-07	7.73e-06	yes	up	XP_027844757.1(fatty acid synthase-like isoform X1 [Aphis gossypii])	GO:0016787(molecular_function:hydrolase activity); GO:0016740(molecular_function:transferase activity); GO:0031177(molecular_function:phosphopantetheine binding); GO:0016491(molecular_function:oxidoreductase activity)	K00665	FASN	map04910(Insulin signaling pathway); map00061(Fatty acid biosynthesis); map04152(AMPK signaling pathway)	COG3321(Q:Secondary metabolites biosynthesis, transport and catabolism)	COG3321(synthase)	PF00698.22(Acyl_transf_1:Acyl transferase domain); PF00109.27(ketoacyl-synt:Beta-ketoacyl synthase, N-terminal domain); PF08659.11(KR:KR domain); PF02801.23(Ketoacyl-synt_C:Beta-ketoacyl synthase, C-terminal domain); PF16197.6(KAsynt_C_assoc:Ketoacyl-synthetase C-terminal extension); PF14765.7(PS-DH:Polyketide synthase dehydratase); PF00550.26(PP-binding:Phosphopantetheine attachment site)	sp|P12276|FAS_CHICK(Fatty acid synthase OS=Gallus gallus OX=9031 GN=FASN PE=1 SV=5)	114125345
LOC114120095	piggyBac transposable element-derived protein 4-like	1683	62	87	49	11	8	13	2.23	2.74	1.92	1.73	1.34	2.07	2.29667	1.71333	0.147989	-2.75644	2.28e-10	1.57e-08	yes	down	XP_027837698.1(piggyBac transposable element-derived protein 4-like, partial [Aphis gossypii])	0	0	0	0	ENOG410ZDPG(S:Function unknown); ENOG410XP35(S:Function unknown); ENOG4110JK7(S:Function unknown); ENOG410XVJ3(S:Function unknown)	ENOG410ZDPG(piggyBac transposable element derived); ENOG410XP35(PiggyBac transposable element derived 5); ENOG4110JK7(-); ENOG410XVJ3(piggyBac transposable element derived 4)	PF13843.7(DDE_Tnp_1_7:Transposase IS4)	sp|Q96DM1|PGBD4_HUMAN(PiggyBac transposable element-derived protein 4 OS=Homo sapiens OX=9606 GN=PGBD4 PE=2 SV=3)	114120095
LOC114125696	lysosomal Pro-X carboxypeptidase-like	1877	360	411	223	1333	1067	1264	10.47	10.67	6.65	37.27	31.63	39.3	9.26333	36.0667	3.37418	1.75454	1.69e-14	1.83e-12	yes	up	XP_027845263.1(lysosomal Pro-X carboxypeptidase-like [Aphis gossypii])	GO:0008236(molecular_function:serine-type peptidase activity)	K01285	PRCP	map04614(Renin-angiotensin system); map04974(Protein digestion and absorption)	ENOG410Y38A(S:Function unknown)	ENOG410Y38A(Lysosomal Pro-X)	PF05577.13(Peptidase_S28:Serine carboxypeptidase S28); PF12146.9(Hydrolase_4:Serine aminopeptidase, S33); PF00326.22(Peptidase_S9:Prolyl oligopeptidase family)	sp|Q7TMR0|PCP_MOUSE(Lysosomal Pro-X carboxypeptidase OS=Mus musculus OX=10090 GN=Prcp PE=1 SV=2)	114125696
LOC114126120	cuticle protein 7-like	714	433.49	239.87	758.38	2.63	0	5.68	51.63	24.31	96.77	0.29	0	0.69	57.57	0.326667	0.00553611	-7.49691	1.93e-14	2.07e-12	yes	down	XP_025194369.1(LOW QUALITY PROTEIN: adhesive plaque matrix protein-like [Melanaphis sacchari])	GO:0042302(molecular_function:structural constituent of cuticle)	K03006	RPB1, POLR2A	map03020(RNA polymerase); map05016(Huntington disease)	ENOG410YXTN(S:Function unknown); ENOG410ZCN2(S:Function unknown)	ENOG410YXTN(Cuticular protein); ENOG410ZCN2(Insect cuticle protein)	PF00379.24(Chitin_bind_4:Insect cuticle protein)	sp|P45583|CU19_LOCMI(Cuticle protein 19 OS=Locusta migratoria OX=7004 PE=1 SV=1)	114126120
LOC114132233	uncharacterized LOC114132233	3657	0	3	2	163	159	209	0	0.04	0.03	2.29	2.36	3.17	0.0233333	2.60667	96.729	6.59588	2.87e-21	5.78e-19	yes	up	XP_027853436.1(uncharacterized protein LOC114132233 [Aphis gossypii])	0	0	0	0	ENOG410YP2D(S:Function unknown); ENOG410Y7Q4(S:Function unknown); COG2801(L:Replication, recombination and repair); ENOG410Z1QR(S:Function unknown)	ENOG410YP2D(Integrase core domain protein); ENOG410Y7Q4(-); COG2801(Retrotransposon protein); ENOG410Z1QR(-)	PF05380.14(Peptidase_A17:Pao retrotransposon peptidase); PF03564.16(DUF1759:Protein of unknown function (DUF1759)); PF05585.13(DUF1758:Putative peptidase (DUF1758)); PF13650.7(Asp_protease_2:Aspartyl protease); PF00078.28(RVT_1:Reverse transcriptase (RNA-dependent DNA polymerase))	0	114132233
LOC114122638	myocilin-like	748	17.53	4.21	2.72	30.07	56.8	65.85	1.93	0.4	0.32	3.1	6.2	7.38	0.883333	5.56	5.30702	2.4079	0.000326624	0.00554115	yes	up	XP_027841185.1(olfactomedin-like protein 2B [Aphis gossypii])	GO:0016021(cellular_component:integral component of membrane); GO:0005581(cellular_component:collagen trimer)	K23027	MYOC	0	ENOG410YHPM(S:Function unknown); ENOG4111PNR(S:Function unknown)	ENOG410YHPM(locomotion); ENOG4111PNR(OLF)	PF02191.17(OLF:Olfactomedin-like domain)	sp|O70624|MYOC_MOUSE(Myocilin OS=Mus musculus OX=10090 GN=Myoc PE=1 SV=1)	114122638
LOC114123106	sodium/hydrogen exchanger 9B2-like	1276	134	120.88	122	53	62	61	6.82	5.36	6.75	2.54	3.14	3.17	6.31	2.95	0.421564	-1.24618	1.01e-06	3.54e-05	yes	down	XP_027841771.1(sodium/hydrogen exchanger 9B2-like [Aphis gossypii])	GO:0016021(cellular_component:integral component of membrane); GO:0015299(molecular_function:solute:proton antiporter activity)	0	0	0	COG0025(P:Inorganic ion transport and metabolism)	COG0025(Sodium hydrogen exchanger)	0	sp|Q86UD5|SL9B2_HUMAN(Sodium/hydrogen exchanger 9B2 OS=Homo sapiens OX=9606 GN=SLC9B2 PE=1 SV=2)	114123106
LOC114129571	5'-nucleotidase-like	1022	139.04	352.27	113.27	0	0	0	9.55	20.93	8.43	0	0	0	12.97	0	0.000857407	-10.1877	3.56e-16	4.64e-14	yes	down	XP_027850159.1(5'-nucleotidase-like [Aphis gossypii])	GO:0009166(biological_process:nucleotide catabolic process); GO:0046872(molecular_function:metal ion binding); GO:0016788(molecular_function:hydrolase activity, acting on ester bonds); GO:0000166(molecular_function:nucleotide binding)	K19970	NT5E, CD73	map00240(Pyrimidine metabolism); map00230(Purine metabolism); map00760(Nicotinate and nicotinamide metabolism)	COG0737(F:Nucleotide transport and metabolism)	COG0737(5-Nucleotidase)	PF02872.19(5_nucleotid_C:5'-nucleotidase, C-terminal domain)	sp|P29240|5NTD_DIPOM(5'-nucleotidase OS=Diplobatis ommata OX=1870830 PE=2 SV=1)	114129571
LOC114124805	vitronectin-like, transcript variant X1	1666	202.14	197.52	226.41	97.82	39	19.66	7.16	6.24	8.53	3.59	1.35	0.73	7.31	1.89	0.234261	-2.09381	1.12e-05	0.000311624	yes	down	XP_027843973.1(matrix metalloproteinase-16 isoform X1 [Aphis gossypii])	GO:0004222(molecular_function:metalloendopeptidase activity); GO:0008270(molecular_function:zinc ion binding); GO:0031012(cellular_component:extracellular matrix)	K07763	MMP14	map04928(Parathyroid hormone synthesis, secretion and action); map04912(GnRH signaling pathway); map04668(TNF signaling pathway)	ENOG410XQ5D(O:Posttranslational modification, protein turnover, chaperones)	ENOG410XQ5D(matrix metallopeptidase)	PF00045.20(Hemopexin:Hemopexin)	sp|Q9JHI0|MMP19_MOUSE(Matrix metalloproteinase-19 OS=Mus musculus OX=10090 GN=Mmp19 PE=2 SV=1)	114124805
LOC114127141	sugar transporter SWEET1-like, transcript variant X1	968	3414	3054	2846	1603	1575	1182	242.89	188.48	219.37	109.24	114.77	88.13	216.913	104.047	0.426019	-1.23101	1.13e-09	6.93e-08	yes	down	XP_027847084.1(sugar transporter SWEET1-like [Aphis gossypii])	GO:0016021(cellular_component:integral component of membrane); GO:0008643(biological_process:carbohydrate transport)	K15382	SLC50A, SWEET	0	ENOG4111M4R(U:Intracellular trafficking, secretion, and vesicular transport)	ENOG4111M4R(sugar transporter)	PF03083.17(MtN3_slv:Sugar efflux transporter for intercellular exchange)	sp|Q7JVE7|SWET1_DROME(Sugar transporter SWEET1 OS=Drosophila melanogaster OX=7227 GN=slv PE=2 SV=1)	114127141
LOC114124807	uncharacterized LOC114124807	775	40	67	37.24	0	0	1	1.66	2.3	1.59	0	0	0.11	1.85	0.0366667	0.00688021	-7.18333	1.25e-08	6.39e-07	yes	down	XP_027843975.1(uncharacterized protein LOC114124800 [Aphis gossypii])	0	0	0	0	0	0	0	0	114124807
LOC114123893	uncharacterized LOC114123893, transcript variant X2	1266	592	940	702	114	129	145	33.34	45.91	43.19	5.94	7.21	8.51	40.8133	7.22	0.159059	-2.65237	1.12e-48	1.17e-45	yes	down	XP_027842828.1(uncharacterized protein LOC114123893 [Aphis gossypii])	0	0	0	0	0	0	0	0	114123893
LOC114121443	actin, muscle-like, transcript variant X2	1249	16990.7	14948	14441	5775.01	6046	8213	815.06	624.4	753.3	260.67	288.64	401.5	730.92	316.937	0.387382	-1.36817	1.06e-15	1.3e-13	yes	down	XP_027839590.1(actin, muscle-like [Aphis gossypii])	GO:0005737(cellular_component:cytoplasm); GO:0005856(cellular_component:cytoskeleton); GO:0000281(biological_process:mitotic cytokinesis); GO:0005524(molecular_function:ATP binding); GO:0015629(cellular_component:actin cytoskeleton)	K05692	ACTB_G1	map05164(Influenza A); map04390(Hippo signaling pathway); map04391(Hippo signaling pathway - fly); map04015(Rap1 signaling pathway); map04210(Apoptosis); map05135(Yersinia infection); map04810(Regulation of actin cytoskeleton); map04921(Oxytocin signaling pathway); map05131(Shigellosis); map05130(Pathogenic Escherichia coli infection); map05132(Salmonella infection); map05225(Hepatocellular carci…	COG5277(S:Function unknown)	COG5277(Transfer protein)	PF00022.20(Actin:Actin)	sp|P49871|ACT_MANSE(Actin, muscle OS=Manduca sexta OX=7130 PE=2 SV=1)	114121443
LOC114132735	L-xylulose reductase-like, transcript variant X1	1231	17	17	14	39	81	45	0.87	0.76	0.81	1.86	4.07	2.32	0.813333	2.75	3.1143	1.63891	0.000311638	0.00530895	yes	up	XP_027854081.1(L-xylulose reductase-like [Aphis gossypii])	GO:0016491(molecular_function:oxidoreductase activity)	K03331	DCXR	map00040(Pentose and glucuronate interconversions)	ENOG410XQCY(S:Function unknown)	ENOG410XQCY()-reductase)	PF13561.7(adh_short_C2:Enoyl-(Acyl carrier protein) reductase); PF00106.26(adh_short:short chain dehydrogenase)	sp|Q8JIS3|DER_CHICK(D-erythrulose reductase OS=Gallus gallus OX=9031 GN=DER PE=1 SV=1)	114132735
LOC114121902	flocculation protein FLO11-like	1199	2000	2420	3011	1360	1163	1137	110.44	116.19	180.7	70.67	63.91	64.03	135.777	66.2033	0.450185	-1.15141	4.1e-09	2.29e-07	yes	down	XP_027840199.1(flocculation protein FLO11-like [Aphis gossypii])	0	K03006	RPB1, POLR2A	map03020(RNA polymerase); map05016(Huntington disease)	0	0	0	0	114121902
LOC114123877	nesprin-2-like	370	22.65	30.25	20.79	6.01	9.04	4.18	13.07	13.28	11.64	3.14	5.01	2.42	12.6633	3.52333	0.235384	-2.08691	0.00048792	0.00767352	yes	down	XP_027842824.1(LOW QUALITY PROTEIN: nesprin-1-like, partial [Aphis gossypii])	GO:0016021(cellular_component:integral component of membrane)	K19326	SYNE1	0	ENOG410YQV5(S:Function unknown); ENOG410ZZU9(S:Function unknown); COG5069(Z:Cytoskeleton); ENOG410Y7B7(Z:Cytoskeleton)	ENOG410YQV5(Nuclear envelope localisation domain); ENOG410ZZU9(Nuclear envelope localisation domain); COG5069(Microtubule associated monoxygenase, calponin and LIM domain containing); ENOG410Y7B7(spectrin repeat containing, nuclear envelope)	PF10541.10(KASH:Nuclear envelope localisation domain)	sp|Q8NF91|SYNE1_HUMAN(Nesprin-1 OS=Homo sapiens OX=9606 GN=SYNE1 PE=1 SV=4)	114123877
LOC114132146	hemocyte protein-glutamine gamma-glutamyltransferase-like	1021	513	699	505	272	295	289	34.92	41.08	37.32	17.38	19.72	19.97	37.7733	19.0233	0.456195	-1.13228	7.42e-13	6.75e-11	yes	down	XP_027853335.1(hemocyte protein-glutamine gamma-glutamyltransferase-like [Aphis gossypii])	GO:0003810(molecular_function:protein-glutamine gamma-glutamyltransferase activity); GO:0046872(molecular_function:metal ion binding); GO:0018149(biological_process:peptide cross-linking)	K05619	TGM1	0	ENOG410XQEZ(O:Posttranslational modification, protein turnover, chaperones)	ENOG410XQEZ(transglutaminase)	PF00868.21(Transglut_N:Transglutaminase family)	sp|Q05187|TGMH_TACTR(Hemocyte protein-glutamine gamma-glutamyltransferase OS=Tachypleus tridentatus OX=6853 PE=1 SV=1)	114132146
LOC114121574	zinc finger RNA-binding protein-like	1209	45515	48107	44318	19388	19642	9604	3333.71	3060.85	3484.26	1261.83	1330.03	678.62	3292.94	1090.16	0.324606	-1.62324	1.83e-09	1.07e-07	yes	down	XP_027839788.1(zinc finger RNA-binding protein-like, partial [Aphis gossypii])	GO:0042302(molecular_function:structural constituent of cuticle)	0	0	0	ENOG4112DDP(S:Function unknown); ENOG41125JG(S:Function unknown)	ENOG4112DDP(Cuticular protein); ENOG41125JG(structural constituent of chitin-based cuticle)	PF00379.24(Chitin_bind_4:Insect cuticle protein)	sp|P82119|CUO6_BLACR(Cuticle protein 6 OS=Blaberus craniifer OX=6982 PE=1 SV=1)	114121574
LOC114125180	TWiK family of potassium channels protein 9-like	683	33.45	20.92	2.53	56.51	138.98	87.06	4.3	2.28	0.35	6.8	17.7	11.39	2.31	11.9633	4.4243	2.14545	0.000497193	0.0077767	yes	up	KAE9544866.1(hypothetical protein AGLY_000409 [Aphis glycines])	GO:0005267(molecular_function:potassium channel activity); GO:0016021(cellular_component:integral component of membrane)	K20007	KCNK18, K2P18.1	0	COG1226(P:Inorganic ion transport and metabolism)	COG1226(PotAssium voltage-gated channel)	PF07885.17(Ion_trans_2:Ion channel); PF00520.32(Ion_trans:Ion transport protein)	sp|P34410|TWK7_CAEEL(TWiK family of potassium channels protein 7 OS=Caenorhabditis elegans OX=6239 GN=twk-7 PE=3 SV=3)	114125180
LOC114121212	putative molluscan insulin-related peptide(s) receptor	1515	0	0	0	122.01	91.47	126.89	0	0	0	4.7	3.73	5.3	0	4.57667	560.247	9.12992	8.24e-14	8.36e-12	yes	up	XP_027839245.1(putative molluscan insulin-related peptide(s) receptor [Aphis gossypii])	GO:0007169(biological_process:transmembrane receptor protein tyrosine kinase signaling pathway); GO:0004714(molecular_function:transmembrane receptor protein tyrosine kinase activity); GO:0016021(cellular_component:integral component of membrane); GO:0005524(molecular_function:ATP binding)	K04527	INSR, CD220	map04022(cGMP-PKG signaling pathway); map04015(Rap1 signaling pathway); map04014(Ras signaling pathway); map04010(MAPK signaling pathway); map04212(Longevity regulating pathway - worm); map04213(Longevity regulating pathway - multiple species); map04072(Phospholipase D signaling pathway); map04211(Longevity regulating pathway); map04960(Aldosterone-regulated sodium reabsorption); map04923(Regulat…	COG0515(T:Signal transduction mechanisms)	COG0515(Serine Threonine protein kinase)	PF00041.22(fn3:Fibronectin type III domain); PF16656.6(Pur_ac_phosph_N:Purple acid Phosphatase, N-terminal domain); PF01030.25(Recep_L_domain:Receptor L domain)	sp|Q25410|MIPR_LYMST(Putative molluscan insulin-related peptide(s) receptor OS=Lymnaea stagnalis OX=6523 PE=2 SV=1)	114121212
LOC114119865	snaclec coagulation factor IX/factor X-binding protein subunit B	1576	70	83	80	29	37	20	2.73	2.83	3.4	1.07	1.44	0.8	2.98667	1.10333	0.337469	-1.56717	6.54e-06	0.000194257	yes	down	XP_027837386.1(snaclec coagulation factor IX/factor X-binding protein subunit B [Aphis gossypii])	GO:0038023(molecular_function:signaling receptor activity)	K22244	REG4	map05226(Gastric cancer)	ENOG410ZHVJ(S:Function unknown); ENOG41128RG(S:Function unknown); ENOG410XPJ1(S:Function unknown)	ENOG410ZHVJ(-); ENOG41128RG(Lectin C-type domain); ENOG410XPJ1(Lectin C-type domain)	PF00059.22(Lectin_C:Lectin C-type domain)	sp|Q9PSM8|SL9B_ECHCA(Snaclec coagulation factor IX/factor X-binding protein subunit B OS=Echis carinatus OX=40353 PE=1 SV=1)	114119865
LOC114121419	myrosinase 1-like	1419	39.85	19.76	53.46	106.59	117.26	169.82	1.77	0.77	2.59	4.46	5.19	7.7	1.71	5.78333	3.08737	1.62638	2.98e-05	0.000726427	yes	up	XP_027839550.1(myrosinase 1-like, partial [Aphis gossypii])	GO:0019137(molecular_function:thioglucosidase activity); GO:0046872(molecular_function:metal ion binding); GO:0005975(biological_process:carbohydrate metabolic process); GO:0102799(molecular_function:glucosinolate glucohydrolase activity); GO:0004553(molecular_function:hydrolase activity, hydrolyzing O-glycosyl compounds)	0	0	0	COG2723(G:Carbohydrate transport and metabolism)	COG2723(beta-glucosidase)	PF00232.19(Glyco_hydro_1:Glycosyl hydrolase family 1)	sp|Q95X01|MYRO1_BREBR(Myrosinase 1 OS=Brevicoryne brassicae OX=69196 PE=1 SV=1)	114121419
LOC114128328	uncharacterized protein DDB_G0283697-like	2767	34	143	136	52	31	31	0.69	2.54	3.01	0.99	0.62	0.64	2.08	0.75	0.343686	-1.54084	0.00183773	0.0229951	yes	down	XP_027848617.1(uncharacterized protein DDB_G0283697-like [Aphis gossypii])	0	0	0	0	0	0	0	0	114128328
LOC114124475	peroxisomal targeting signal 2 receptor, transcript variant X3	1401	22.01	29.01	35.02	75.02	71.03	74.02	1.1	1.45	1.9	3.77	3.46	3.84	1.48333	3.69	2.33302	1.2222	0.000249603	0.00445747	yes	up	XP_027843533.1(peroxisomal targeting signal 2 receptor isoform X2 [Aphis gossypii])	0	K13341	PEX7, PTS2R	map04146(Peroxisome)	ENOG410XNVU(S:Function unknown)	ENOG410XNVU(Peroxisomal targeting signal)	PF00400.33(WD40:WD domain, G-beta repeat)	sp|O00628|PEX7_HUMAN(Peroxisomal targeting signal 2 receptor OS=Homo sapiens OX=9606 GN=PEX7 PE=1 SV=1)	114124475
LOC114128191	maltase A3-like	2121	758	1246	975	350	339	496	20.72	29.91	29.15	9.03	9.24	13.84	26.5933	10.7033	0.36356	-1.45973	1.61e-14	1.75e-12	yes	down	XP_027848445.1(maltase A3-like [Aphis gossypii])	GO:0003824(molecular_function:catalytic activity); GO:0016021(cellular_component:integral component of membrane); GO:0005975(biological_process:carbohydrate metabolic process); GO:0016787(molecular_function:hydrolase activity)	0	0	0	COG0366(G:Carbohydrate transport and metabolism)	COG0366(alpha amylase, catalytic)	PF00128.25(Alpha-amylase:Alpha amylase, catalytic domain)	sp|O16098|MAL1_DROVI(Maltase 1 OS=Drosophila virilis OX=7244 GN=Mal-B1 PE=3 SV=2)	114128191
LOC114121825	uncharacterized LOC114121825	503	2	2	17	0	0	0	0.48	0.39	4.23	0	0	0	1.7	0	0.023553	-5.40795	0.00342167	0.0378833	yes	down	XP_027840106.1(uncharacterized protein LOC114121825 [Aphis gossypii])	0	0	0	0	0	0	0	0	114121825
LOC114125877	endocuticle structural glycoprotein SgAbd-4-like	846	42151	33647	36685	15257	15420	21453	3818.2	2618.16	3583	1296.66	1386.73	1979.29	3339.79	1554.23	0.414372	-1.271	9.05e-12	7.31e-10	yes	down	XP_027845471.1(endocuticle structural glycoprotein SgAbd-4-like [Aphis gossypii])	GO:0042302(molecular_function:structural constituent of cuticle)	0	0	0	ENOG4111PJ1(S:Function unknown); ENOG4111ZVI(S:Function unknown); ENOG410YR66(S:Function unknown); ENOG410XTK4(S:Function unknown)	ENOG4111PJ1(Cuticular protein); ENOG4111ZVI(Insect cuticle protein); ENOG410YR66(structural constituent of chitin-based cuticle); ENOG410XTK4(Cuticular protein)	PF00379.24(Chitin_bind_4:Insect cuticle protein)	sp|Q7M4F1|CUD4_SCHGR(Endocuticle structural glycoprotein SgAbd-4 OS=Schistocerca gregaria OX=7010 PE=1 SV=1)	114125877
LOC114127399	THAP domain-containing protein 4-like	462	294	430	338	0	0	6	5.28	6.81	6.66	0	0	0.11	6.25	0.0366667	0.00499386	-7.64563	1.01e-11	8.08e-10	yes	down	XP_027847426.1(THAP domain-containing protein 4-like [Aphis gossypii])	GO:0004803(molecular_function:transposase activity); GO:0016021(cellular_component:integral component of membrane); GO:0006313(biological_process:transposition, DNA-mediated); GO:0003677(molecular_function:DNA binding)	0	0	0	ENOG410YCBC(S:Function unknown); ENOG4110QSK(S:Function unknown)	ENOG410YCBC(-); ENOG4110QSK(DM3)	PF05485.13(THAP:THAP domain)	0	114127399
LOC114130203	uncharacterized LOC114130203	649	29	32	13	1	5	3	4.09	3.81	1.95	0.13	0.7	0.43	3.28333	0.42	0.110153	-3.18241	4.07e-05	0.000950844	yes	down	XP_027850923.1(uncharacterized protein LOC114130203 [Aphis gossypii])	GO:0016021(cellular_component:integral component of membrane)	0	0	0	0	0	0	0	114130203
LOC114128307	uncharacterized LOC114128307	3876	71	67	89	29	39	42	1.48	1.2	2.03	0.57	0.81	0.89	1.57	0.756667	0.436047	-1.19744	0.000221879	0.00403144	yes	down	XP_027848589.1(uncharacterized protein LOC114128307 [Aphis gossypii])	0	K20674	MODSP	map04624(Toll and Imd signaling pathway)	COG5640(O:Posttranslational modification, protein turnover, chaperones)	COG5640(protease)	PF00089.27(Trypsin:Trypsin); PF00057.19(Ldl_recept_a:Low-density lipoprotein receptor domain class A)	sp|P28175|CFC_TACTR(Clotting factor C OS=Tachypleus tridentatus OX=6853 PE=1 SV=1)	114128307
LOC114129182	transport and Golgi organization protein 2 homolog	1952	272	338	299	141	155	138	8.2	8.93	9.85	4.01	4.65	4.24	8.99333	4.3	0.435685	-1.19864	1.66e-11	1.29e-09	yes	down	XP_027849636.1(transport and Golgi organization protein 2 homolog [Aphis gossypii])	0	0	0	0	COG3332(S:Function unknown)	COG3332(Chromosome 22 open reading frame 25)	PF05742.13(TANGO2:Transport and Golgi organisation 2)	sp|Q29RZ5|TNG2_BOVIN(Transport and Golgi organization protein 2 homolog OS=Bos taurus OX=9913 GN=TANGO2 PE=2 SV=1)	114129182
LOC114125093	histone-lysine N-methyltransferase, H3 lysine-79 specific-like	2422	0	0	0	28.53	26.86	26.11	0	0	0	0.63	0.63	0.63	0	0.63	135.429	7.0814	6.73e-08	3.05e-06	yes	up	XP_027844388.1(histone-lysine N-methyltransferase, H3 lysine-79 specific-like [Aphis gossypii])	GO:0005634(cellular_component:nucleus); GO:0031151(molecular_function:histone methyltransferase activity (H3-K79 specific)); GO:0051726(biological_process:regulation of cell cycle)	K11427	DOT1L, DOT1	map00310(Lysine degradation); map05202(Transcriptional misregulation in cancer)	ENOG410XSYC(B:Chromatin structure and dynamics)	ENOG410XSYC(Histone methyltransferase that specifically methylates histone H3 to form H3K79me. This methylation is required for telomere silencing and for the pachytene checkpoint during the meiotic cell cycle by allowing the recruitment of RAD9 to double strand breaks. Nucleosomes are preferred as substrate compared to free histones (By similarity))	0	sp|Q8INR6|DOT1L_DROME(Histone-lysine N-methyltransferase, H3 lysine-79 specific OS=Drosophila melanogaster OX=7227 GN=gpp PE=1 SV=2)	114125093
LOC114128631	thrombospondin type-1 domain-containing protein 1, transcript variant X1	1975	114	117	131	363	436	476	3.39	3.05	4.26	10.35	13.06	14.64	3.56667	12.6833	3.18191	1.66989	1.37e-19	2.57e-17	yes	up	KAE9530696.1(hypothetical protein AGLY_011158 [Aphis glycines])	GO:0016021(cellular_component:integral component of membrane)	0	0	0	ENOG410YMEG(S:Function unknown)	ENOG410YMEG(locomotion)	PF00090.20(TSP_1:Thrombospondin type 1 domain); PF19028.1(TSP1_spondin:Spondin-like TSP1 domain)	sp|Q8TE60|ATS18_HUMAN(A disintegrin and metalloproteinase with thrombospondin motifs 18 OS=Homo sapiens OX=9606 GN=ADAMTS18 PE=1 SV=3)	114128631
LOC114125131	prisilkin-39-like, transcript variant X1	1015	40427	58671	50420	20280	17833	7743	3306.06	4291.33	4715.47	1505.38	1395.73	614.29	4104.29	1171.8	0.286405	-1.80387	1.01e-08	5.24e-07	yes	down	XP_027844445.1(prisilkin-39-like isoform X1 [Aphis gossypii])	0	K03006	RPB1, POLR2A	map03020(RNA polymerase); map05016(Huntington disease)	0	0	0	0	114125131
LOC114129240	protein yellow-like, transcript variant X1	3045	62	58	50	113	174	95	1.56	1.36	1.52	2.47	3.81	2.41	1.48	2.89667	2.0417	1.02977	0.00145512	0.0190662	yes	up	XP_027849701.1(protein yellow-like [Aphis gossypii])	0	0	0	0	ENOG410XT7N(S:Function unknown)	ENOG410XT7N(Major royal jelly protein)	PF03022.17(MRJP:Major royal jelly protein)	sp|P09957|YELL_DROME(Protein yellow OS=Drosophila melanogaster OX=7227 GN=y PE=2 SV=1)	114129240
LOC114129712	BUD13 homolog	1107	0	0	0	60.57	7.81	27.67	0	0	0	3.5	0.48	1.73	0	1.90333	163.844	7.35618	3.5e-07	1.37e-05	yes	up	XP_027850326.1(BUD13 homolog [Aphis gossypii])	0	K13106	BUD13, CWC26	0	ENOG410XSEZ(S:Function unknown)	ENOG410XSEZ(BUD13 homolog (S. cerevisiae))	PF09736.10(Bud13:Pre-mRNA-splicing factor of RES complex)	sp|Q8R149|BUD13_MOUSE(BUD13 homolog OS=Mus musculus OX=10090 GN=Bud13 PE=1 SV=1)	114129712
LOC114119834	uncharacterized LOC114119834	5706	171.89	209.43	191.19	39.86	34.41	62.98	1.59	1.71	1.94	0.35	0.32	0.59	1.74667	0.42	0.216858	-2.20518	8.18e-17	1.12e-14	yes	down	XP_027837351.1(uncharacterized protein LOC114119834 [Aphis gossypii])	0	0	0	0	COG2801(L:Replication, recombination and repair); ENOG410Y7Q4(S:Function unknown); ENOG410YHBQ(S:Function unknown); ENOG410YP2D(S:Function unknown); ENOG4112AZ8(S:Function unknown); ENOG4111PX2(S:Function unknown)	COG2801(Retrotransposon protein); ENOG410Y7Q4(-); ENOG410YHBQ(-); ENOG410YP2D(Integrase core domain protein); ENOG4112AZ8(-); ENOG4111PX2(-)	PF05380.14(Peptidase_A17:Pao retrotransposon peptidase); PF18701.2(DUF5641:Family of unknown function (DUF5641)); PF03564.16(DUF1759:Protein of unknown function (DUF1759)); PF05585.13(DUF1758:Putative peptidase (DUF1758)); PF17921.2(Integrase_H2C2:Integrase zinc binding domain); PF00665.27(rve:Integrase core domain); PF00078.28(RVT_1:Reverse transcriptase (RNA-dependent DNA polymerase))	0	114119834
LOC114132272	maltase 2-like	2120	334.62	334.06	520.39	2113.6	2590.88	1580	7.81	6.65	13.5	46.59	60.23	37.16	9.32	47.9933	4.80704	2.26515	3e-18	4.7e-16	yes	up	XP_027853483.1(maltase 2-like [Aphis gossypii])	GO:0003824(molecular_function:catalytic activity); GO:0005975(biological_process:carbohydrate metabolic process)	0	0	0	COG0366(G:Carbohydrate transport and metabolism)	COG0366(alpha amylase, catalytic)	PF00128.25(Alpha-amylase:Alpha amylase, catalytic domain)	sp|O16098|MAL1_DROVI(Maltase 1 OS=Drosophila virilis OX=7244 GN=Mal-B1 PE=3 SV=2)	114132272
LOC114132207	uclacyanin-3	468	260	241	282	758	839	578	74.11	55.54	83	199.49	234.39	166.71	70.8833	200.197	2.52655	1.33717	1.35e-09	8.08e-08	yes	up	XP_027853404.1(uclacyanin-3 [Aphis gossypii])	0	0	0	0	0	0	0	0	114132207
LOC114127232	solute carrier family 2, facilitated glucose transporter member 8-like	2544	395	381	198	106	98	228	8.77	7.44	4.81	2.22	2.17	5.17	7.00667	3.18667	0.396347	-1.33516	0.000153961	0.00297666	yes	down	XP_027847222.1(solute carrier family 2, facilitated glucose transporter member 8-like [Aphis gossypii])	GO:0022857(molecular_function:transmembrane transporter activity); GO:0016021(cellular_component:integral component of membrane); GO:0008643(biological_process:carbohydrate transport)	K08145	SLC2A8, GLUT8	0	ENOG410XNQK(S:Function unknown)	ENOG410XNQK(Juvenile hormone-inducible protein)	PF00083.25(Sugar_tr:Sugar (and other) transporter); PF07690.17(MFS_1:Major Facilitator Superfamily)	sp|Q9JIF3|GTR8_MOUSE(Solute carrier family 2, facilitated glucose transporter member 8 OS=Mus musculus OX=10090 GN=Slc2a8 PE=1 SV=2)	114127232
LOC114131166	uncharacterized LOC114131166	2529	0	1	3	19	24	22	0	0.02	0.07	0.4	0.53	0.5	0.03	0.476667	14.7933	3.88687	4.53e-05	0.00103569	yes	up	XP_027852126.1(uncharacterized protein LOC114131166 [Aphis gossypii])	GO:0015074(biological_process:DNA integration); GO:0003676(molecular_function:nucleic acid binding)	0	0	0	ENOG4112AZ8(S:Function unknown); ENOG4111PX2(S:Function unknown); COG2801(L:Replication, recombination and repair)	ENOG4112AZ8(-); ENOG4111PX2(-); COG2801(Retrotransposon protein)	PF05380.14(Peptidase_A17:Pao retrotransposon peptidase); PF18701.2(DUF5641:Family of unknown function (DUF5641)); PF17921.2(Integrase_H2C2:Integrase zinc binding domain); PF09337.11(zf-H2C2:H2C2 zinc finger)	0	114131166
LOC114127998	monocarboxylate transporter 11-like	586	94	84	58	43	30	44	9.75	8.66	6.99	5.39	3.51	7.23	8.46667	5.37667	0.449198	-1.15458	0.00092532	0.0132114	yes	down	XP_027848194.1(monocarboxylate transporter 11-like, partial [Aphis gossypii])	GO:0022857(molecular_function:transmembrane transporter activity); GO:0016021(cellular_component:integral component of membrane)	0	0	0	COG0477(E:Amino acid transport and metabolism); ENOG410ZITK(E:Amino acid transport and metabolism)	COG0477(aminotransferase); ENOG410ZITK(Solute carrier family 16, member 4 (Monocarboxylic acid transporter 5))	PF07690.17(MFS_1:Major Facilitator Superfamily)	sp|P57788|MOT4_CHICK(Monocarboxylate transporter 4 OS=Gallus gallus OX=9031 GN=SLC16A3 PE=2 SV=1)	114127998
LOC114119882	myrosinase 1-like	1058	1203.11	1572.85	1183.11	508.98	340.47	452.94	78.71	89.16	83.93	31.31	22.15	30.21	83.9333	27.89	0.302115	-1.72683	1.34e-18	2.26e-16	yes	down	XP_027837404.1(myrosinase 1-like [Aphis gossypii])	GO:0005975(biological_process:carbohydrate metabolic process); GO:0004553(molecular_function:hydrolase activity, hydrolyzing O-glycosyl compounds)	0	0	0	COG2723(G:Carbohydrate transport and metabolism)	COG2723(beta-glucosidase)	PF00232.19(Glyco_hydro_1:Glycosyl hydrolase family 1)	sp|Q95X01|MYRO1_BREBR(Myrosinase 1 OS=Brevicoryne brassicae OX=69196 PE=1 SV=1)	114119882
LOC114131099	DNA damage-binding protein 1-like	480	48.49	69.02	62.61	27.12	26.96	26.18	12.96	14.99	17.35	6.7	7.07	7.09	15.1	6.95333	0.406636	-1.29819	0.000138936	0.00273148	yes	down	XP_027852040.1(DNA damage-binding protein 1-like, partial [Aphis gossypii])	GO:0005634(cellular_component:nucleus); GO:0003676(molecular_function:nucleic acid binding); GO:0006281(biological_process:DNA repair)	K10610	DDB1	map05170(Human immunodeficiency virus 1 infection); map05203(Viral carcinogenesis); map03420(Nucleotide excision repair); map04120(Ubiquitin mediated proteolysis); map05161(Hepatitis B)	ENOG410XPF6(L:Replication, recombination and repair)	ENOG410XPF6(DNA- binding protein)	PF03178.16(CPSF_A:CPSF A subunit region)	sp|Q6P6Z0|DDB1_XENLA(DNA damage-binding protein 1 OS=Xenopus laevis OX=8355 GN=ddb1 PE=2 SV=1)	114131099
LOC114121853	uncharacterized LOC114121853	1293	2080	1795	2306	1197	1153	726	103.61	77.89	125.07	56.24	57.08	43.72	102.19	52.3467	0.453487	-1.14087	4.5e-06	0.000138414	yes	down	XP_027840141.1(uncharacterized protein LOC114121853 [Aphis gossypii])	GO:0005549(molecular_function:odorant binding); GO:0016021(cellular_component:integral component of membrane)	0	0	0	ENOG410Z2AJ(S:Function unknown)	ENOG410Z2AJ(-)	PF01395.23(PBP_GOBP:PBP/GOBP family)	0	114121853
LOC114119672	uncharacterized LOC114119672	831	17	11	17	0	0	1	1.58	0.88	1.71	0	0	0.09	1.39	0.03	0.0214077	-5.54573	6.68e-05	0.00145661	yes	down	XP_027837119.1(uncharacterized protein LOC114119672 [Aphis gossypii])	0	0	0	0	0	0	0	0	114119672
LOC114127927	lipase member H-like, transcript variant X1	1316	343	278	281	194	124	55	18.63	13.08	16.62	9.91	6.7	3.02	16.11	6.54333	0.381772	-1.38922	0.000566801	0.00867607	yes	down	XP_027848095.1(phospholipase A1-like isoform X1 [Aphis gossypii])	GO:0016021(cellular_component:integral component of membrane); GO:0005576(cellular_component:extracellular region); GO:0052689(molecular_function:carboxylic ester hydrolase activity)	0	0	0	ENOG4111KSA(S:Function unknown)	ENOG4111KSA(Lipase)	PF00151.20(Lipase:Lipase); PF12697.8(Abhydrolase_6:Alpha/beta hydrolase family)	sp|Q6PA23|LIPHA_XENLA(Lipase member H-A OS=Xenopus laevis OX=8355 GN=liph-a PE=2 SV=1)	114127927
LOC114129127	uncharacterized LOC114129127	3880	11	10	16	85	78	64	0.15	0.12	0.24	1.16	1.2	0.93	0.17	1.09667	5.59416	2.48392	2.74e-09	1.58e-07	yes	up	KAE9532362.1(hypothetical protein AGLY_009985 [Aphis glycines])	0	0	0	0	0	0	0	0	114129127
LOC114132346	peptide chain release factor 1-like, mitochondrial	1363	83.28	90.87	85.78	7.49	6.62	10.34	4.2	3.7	4.37	0.64	0.31	0.49	4.09	0.48	0.0836277	-3.57988	6.44e-18	9.47e-16	yes	down	XP_027853585.1(peptide chain release factor 1-like, mitochondrial [Aphis gossypii])	GO:0003747(molecular_function:translation release factor activity)	K02835	prfA, MTRF1, MRF1	0	COG0216(J:Translation, ribosomal structure and biogenesis)	COG0216(Peptide chain release factor 1 directs the termination of translation in response to the peptide chain termination codons UAG and UAA (By similarity))	PF03462.19(PCRF:PCRF domain); PF00472.21(RF-1:RF-1 domain)	sp|Q2KI15|RF1ML_BOVIN(Peptide chain release factor 1-like, mitochondrial OS=Bos taurus OX=9913 GN=MTRF1L PE=2 SV=1)	114132346
LOC114124137	uncharacterized LOC114124137	1114	1289	1450	1565	833	779	713	78.56	76.69	103.53	47.76	47.23	44.31	86.26	46.4333	0.492905	-1.02062	4.06e-10	2.72e-08	yes	down	XP_027843121.1(uncharacterized protein LOC114124137 [Aphis gossypii])	0	0	0	0	0	0	0	0	114124137
LOC114118912	vesicle-associated membrane protein 2-like	1040	270	272	311	774	867	797	18.09	15.78	22.59	48.76	57.76	54.44	18.82	53.6533	2.59123	1.37364	4.2e-17	5.8e-15	yes	up	VVC29021.1(Synaptobrevin,Synaptobrevin/Vesicle-associated membrane protein [Cinara cedri])	GO:0016192(biological_process:vesicle-mediated transport); GO:0016021(cellular_component:integral component of membrane); GO:0006906(biological_process:vesicle fusion); GO:0019905(molecular_function:syntaxin binding); GO:0005886(cellular_component:plasma membrane); GO:0005484(molecular_function:SNAP receptor activity); GO:0031201(cellular_component:SNARE complex)	K13504	VAMP2	map04911(Insulin secretion); map04970(Salivary secretion); map04721(Synaptic vesicle cycle); map04130(SNARE interactions in vesicular transport); map04962(Vasopressin-regulated water reabsorption)	COG5143(J:Translation, ribosomal structure and biogenesis)	COG5143(sites to release the intron. The products are an intron and two tRNA half-molecules bearing 2',3' cyclic phosphate and 5'-OH termini. Recognizes a pseudosymmetric substrate in which 2 bulged loops of 3 bases are separated by a stem of 4 bp (By similarity))	PF00957.22(Synaptobrevin:Synaptobrevin)	sp|P35589|SYB_APLCA(Synaptobrevin OS=Aplysia californica OX=6500 PE=1 SV=1)	114118912
LOC114119300	fatty acyl-CoA reductase wat-like	2029	5531	7105	8076	4537	4024	1989	159.24	179.5	254.2	123.21	115.49	58.46	197.647	99.0533	0.472023	-1.08307	0.000266791	0.00464858	yes	down	XP_027836609.1(fatty acyl-CoA reductase wat-like [Aphis gossypii])	GO:0102965(molecular_function:alcohol-forming fatty acyl-CoA reductase activity); GO:0016021(cellular_component:integral component of membrane); GO:0080019(molecular_function:fatty-acyl-CoA reductase (alcohol-forming) activity); GO:0006629(biological_process:lipid metabolic process)	K13356	FAR	map04146(Peroxisome); map04212(Longevity regulating pathway - worm)	ENOG410XS7R(S:Function unknown)	ENOG410XS7R(fatty-acyl-CoA reductase (alcohol-forming) activity)	PF07993.13(NAD_binding_4:Male sterility protein); PF03015.20(Sterile:Male sterility protein); PF02719.16(Polysacc_synt_2:Polysaccharide biosynthesis protein); PF01118.25(Semialdhyde_dh:Semialdehyde dehydrogenase, NAD binding domain)	sp|Q8MS59|WAT_DROME(Fatty acyl-CoA reductase wat OS=Drosophila melanogaster OX=7227 GN=wat PE=1 SV=1)	114119300
LOC114118978	uncharacterized LOC114118978, transcript variant X1	2814	0	0	0	75	124	114	0	0	0	1.5	2.45	2.31	0	2.08667	511.609	8.9989	2.3e-13	2.22e-11	yes	up	XP_027836227.1(uncharacterized protein LOC114118978 isoform X1 [Aphis gossypii])	GO:0046983(molecular_function:protein dimerization activity)	0	0	0	ENOG410XRF1(S:Function unknown)	ENOG410XRF1(MADF)	PF14291.7(DUF4371:Domain of unknown function (DUF4371)); PF05699.15(Dimer_Tnp_hAT:hAT family C-terminal dimerisation region)	sp|Q5SVZ6|ZMYM1_HUMAN(Zinc finger MYM-type protein 1 OS=Homo sapiens OX=9606 GN=ZMYM1 PE=1 SV=1)	114118978
LOC114132117	probable malonyl-CoA-acyl carrier protein transacylase, mitochondrial	1029	70.86	44.37	53.86	3.69	4.95	3.16	4.82	2.61	3.97	0.24	0.33	0.22	3.8	0.263333	0.0636268	-3.97422	1.52e-11	1.18e-09	yes	down	XP_027853311.1(probable malonyl-CoA-acyl carrier protein transacylase, mitochondrial [Aphis gossypii])	GO:0016787(molecular_function:hydrolase activity); GO:0016740(molecular_function:transferase activity)	K00645	fabD, MCAT, MCT1	map00061(Fatty acid biosynthesis)	COG0331(I:Lipid transport and metabolism)	COG0331(Malonyl coA-acyl carrier protein transacylase)	PF00698.22(Acyl_transf_1:Acyl transferase domain)	sp|Q8T3L6|FABD_DROME(Probable malonyl-CoA-acyl carrier protein transacylase, mitochondrial OS=Drosophila melanogaster OX=7227 GN=beg PE=2 SV=2)	114132117
LOC114126811	cadherin-89D-like	900	20.22	35.31	60.43	0	7.29	3.6	1.67	2.51	5.38	0	0.6	0.3	3.18667	0.3	0.086049	-3.5387	3.95e-06	0.000123926	yes	down	XP_027846635.1(cadherin-89D-like [Aphis gossypii])	GO:0016021(cellular_component:integral component of membrane); GO:0007156(biological_process:homophilic cell adhesion via plasma membrane adhesion molecules); GO:0005509(molecular_function:calcium ion binding); GO:0005886(cellular_component:plasma membrane)	0	0	0	ENOG410XQHI(S:Function unknown)	ENOG410XQHI(Collagen triple helix repeat (20 copies))	PF00028.18(Cadherin:Cadherin domain)	sp|Q9VEU1|CAD89_DROME(Cadherin-89D OS=Drosophila melanogaster OX=7227 GN=Cad89D PE=2 SV=3)	114126811
LOC114125085	glucosidase 2 subunit beta-like	1836	2726	3414	3359	1155	1286	1624	89.6	97.98	120.39	35.86	42.17	54.22	102.657	44.0833	0.387684	-1.36705	1.85e-22	4.09e-20	yes	down	XP_027844380.1(glucosidase 2 subunit beta-like [Aphis gossypii])	GO:0016021(cellular_component:integral component of membrane); GO:0005509(molecular_function:calcium ion binding); GO:0006491(biological_process:N-glycan processing)	K08288	PRKCSH	map04141(Protein processing in endoplasmic reticulum)	ENOG410XPE3(O:Posttranslational modification, protein turnover, chaperones); COG5188(A:RNA processing and modification)	ENOG410XPE3(protein kinase C substrate); COG5188(Splicing factor 3A subunit 3)	PF12999.8(PRKCSH-like:Glucosidase II beta subunit-like); PF13015.7(PRKCSH_1:Glucosidase II beta subunit-like protein); PF07915.14(PRKCSH:Glucosidase II beta subunit-like protein); PF13405.7(EF-hand_6:EF-hand domain); PF00057.19(Ldl_recept_a:Low-density lipoprotein receptor domain class A); PF00036.33(EF-hand_1:EF hand)	sp|O08795|GLU2B_MOUSE(Glucosidase 2 subunit beta OS=Mus musculus OX=10090 GN=Prkcsh PE=1 SV=1)	114125085
LOC114124204	uncharacterized LOC114124204	779	0	0	0	260.09	315.45	296.42	0	0	0	21.36	28.68	26.8	0	25.6133	1431.49	10.4833	2.04e-18	3.34e-16	yes	up	XP_027843194.1(uncharacterized protein LOC114124203 [Aphis gossypii])	0	0	0	0	ENOG410YV20(S:Function unknown)	ENOG410YV20(C1q-like venom protein)	PF00386.22(C1q:C1q domain)	0	114124204
LOC114120598	uncharacterized LOC114120598	2637	487	825	540	322	346	335	13.27	18.27	16.46	7.84	8.58	8.26	16	8.22667	0.499163	-1.00242	7.27e-08	3.27e-06	yes	down	XP_027838354.1(uncharacterized protein LOC114120598 [Aphis gossypii])	0	0	0	0	0	0	0	0	114120598
LOC114121295	cathepsin B-like	1090	56770	102685	57262	35899	39282	39579	3310.01	5152.62	3612.67	1961.02	2284.28	2339.89	4025.1	2195.06	0.489628	-1.03024	5.79e-08	2.66e-06	yes	down	XP_027839358.1(cathepsin B-like [Aphis gossypii])	GO:0004197(molecular_function:cysteine-type endopeptidase activity); GO:0050790(biological_process:regulation of catalytic activity)	K01363	CTSB	map04142(Lysosome); map04621(NOD-like receptor signaling pathway); map04924(Renin secretion); map04210(Apoptosis); map04612(Antigen processing and presentation); map04140(Autophagy - animal)	COG4870(O:Posttranslational modification, protein turnover, chaperones)	COG4870(cathepsin)	PF00112.24(Peptidase_C1:Papain family cysteine protease); PF08127.14(Propeptide_C1:Peptidase family C1 propeptide)	sp|P00787|CATB_RAT(Cathepsin B OS=Rattus norvegicus OX=10116 GN=Ctsb PE=1 SV=2)	114121295
LOC114122719	uncharacterized LOC114122719	1117	51.38	45.67	64.66	105.9	133.53	178.12	3.12	2.41	4.26	6.05	8.07	11.03	3.26333	8.38333	2.31175	1.20898	3.71e-05	0.000878976	yes	up	KAE9529094.1(hypothetical protein AGLY_012048 [Aphis glycines])	0	K11424	WHSC1, MMSET, NSD2	map00310(Lysine degradation); map05202(Transcriptional misregulation in cancer)	COG2940(S:Function unknown)	COG2940(Histone-lysine N-methyltransferase)	0	0	114122719
LOC114131304	lysosomal alpha-glucosidase-like, transcript variant X1	3530	25	33	25	169	145	138	0.39	0.45	0.42	2.46	2.23	2.18	0.42	2.29	4.99839	2.32146	4.62e-15	5.4e-13	yes	up	XP_027852288.1(lysosomal alpha-glucosidase-like isoform X1 [Aphis gossypii])	0	K12316	GAA	map00500(Starch and sucrose metabolism); map04142(Lysosome); map00052(Galactose metabolism)	COG1501(S:Function unknown)	COG1501(repeat-containing protein)	PF01055.27(Glyco_hydro_31:Glycosyl hydrolases family 31); PF16863.6(NtCtMGAM_N:N-terminal barrel of NtMGAM and CtMGAM, maltase-glucoamylase); PF13802.7(Gal_mutarotas_2:Galactose mutarotase-like); PF00088.19(Trefoil:Trefoil (P-type) domain)	sp|Q9MYM4|LYAG_BOVIN(Lysosomal alpha-glucosidase OS=Bos taurus OX=9913 GN=GAA PE=2 SV=1)	114131304
LOC114128182	cytochrome b561-like, transcript variant X1	1059	112	138	119	43	46	65	6.55	7.05	7.55	2.35	2.7	3.83	7.05	2.96	0.37838	-1.40209	6.62e-08	3.01e-06	yes	down	XP_027848433.1(cytochrome b561-like isoform X1 [Aphis gossypii])	GO:0005765(cellular_component:lysosomal membrane); GO:0016021(cellular_component:integral component of membrane); GO:0046872(molecular_function:metal ion binding); GO:0031902(cellular_component:late endosome membrane); GO:0016491(molecular_function:oxidoreductase activity)	K08360	CYB561	0	ENOG4111FKI(O:Posttranslational modification, protein turnover, chaperones)	ENOG4111FKI(Cytochrome)	PF03188.17(Cytochrom_B561:Eukaryotic cytochrome b561); PF13301.7(DUF4079:Protein of unknown function (DUF4079))	sp|Q95245|CY561_PIG(Cytochrome b561 OS=Sus scrofa OX=9823 GN=CYB561 PE=2 SV=1)	114128182
LOC114127773	homeobox protein slou-like	3467	58	46	38	101	120	107	0.91	0.64	0.66	1.5	1.88	1.72	0.736667	1.7	2.08633	1.06097	0.000348921	0.0058145	yes	up	XP_027847896.1(LOW QUALITY PROTEIN: homeobox protein slou-like, partial [Aphis gossypii])	GO:0043565(molecular_function:sequence-specific DNA binding); GO:0005634(cellular_component:nucleus); GO:0006355(biological_process:regulation of transcription, DNA-templated)	K09309	NKX1	0	ENOG411188D(S:Function unknown)	ENOG411188D(kiaa0196)	PF00046.30(Homeodomain:Homeodomain)	sp|P22807|SLOU_DROME(Homeobox protein slou OS=Drosophila melanogaster OX=7227 GN=slou PE=2 SV=1)	114127773
LOC114125575	acetyl-coenzyme A transporter 1-like	1918	55	116	96	44	43	57	1.53	2.77	2.79	1.28	1.15	1.72	2.36333	1.38333	0.495693	-1.01248	0.00186031	0.0232083	yes	down	XP_027845092.1(acetyl-coenzyme A transporter 1-like [Aphis gossypii])	GO:0008521(molecular_function:acetyl-CoA transporter activity); GO:0016021(cellular_component:integral component of membrane)	K03372	ACATN, SLC33A1	map00604(Glycosphingolipid biosynthesis - ganglio series)	COG0477(G:Carbohydrate transport and metabolism)	COG0477(major facilitator Superfamily)	PF13000.8(Acatn:Acetyl-coenzyme A transporter 1)	sp|O00400|ACATN_HUMAN(Acetyl-coenzyme A transporter 1 OS=Homo sapiens OX=9606 GN=SLC33A1 PE=1 SV=1)	114125575
LOC114128462	U6 snRNA phosphodiesterase	980	168	167	145	80	73	86	12.24	10.52	11.44	5.48	5.29	6.39	11.4	5.72	0.451493	-1.14722	5.73e-07	2.15e-05	yes	down	XP_027848765.1(U6 snRNA phosphodiesterase [Aphis gossypii])	GO:0005634(cellular_component:nucleus); GO:0034477(biological_process:U6 snRNA 3'-end processing); GO:1990838(molecular_function:poly(U)-specific exoribonuclease activity, producing 3' uridine cyclic phosphate ends)	K23093	USB1	0	ENOG4111KT5(A:RNA processing and modification)	ENOG4111KT5(Phosphodiesterase responsible for the U6 snRNA 3' end processing. Acts as an exoribonuclease (RNase) responsible for trimming the poly(U) tract of the last nucleotides in the pre-U6 snRNA molecule, leading to the formation of mature U6 snRNA)	PF09749.10(HVSL:Uncharacterised conserved protein); PF13563.7(2_5_RNA_ligase2:2'-5' RNA ligase superfamily)	sp|Q7ZYI9|USB1_XENLA(U6 snRNA phosphodiesterase OS=Xenopus laevis OX=8355 GN=usb1 PE=2 SV=1)	114128462
LOC114129836	hypertrehalosaemic prohormone-like, transcript variant X1	715	510	508	540	211	236	194	67.55	56.55	75.58	26.31	30.63	26.17	66.56	27.7033	0.373453	-1.421	4.8e-15	5.56e-13	yes	down	XP_027850481.1(hypertrehalosaemic prohormone-like [Aphis gossypii])	GO:0005179(molecular_function:hormone activity); GO:0007218(biological_process:neuropeptide signaling pathway); GO:0005576(cellular_component:extracellular region)	0	0	0	0	0	PF06377.12(Adipokin_hormo:Adipokinetic hormone)	sp|Q17128|HTF_BLADI(Hypertrehalosaemic prohormone OS=Blaberus discoidalis OX=6981 PE=1 SV=1)	114129836
LOC114123829	endoplasmic reticulum metallopeptidase 1-like, transcript variant X1	3137	273.1	240.25	197.86	607.79	592.44	364.71	4.8	3.72	3.81	10.68	10.88	6.78	4.11	9.44667	2.01138	1.00819	0.000205043	0.0037553	yes	up	XP_027842732.1(endoplasmic reticulum metallopeptidase 1-like [Aphis gossypii])	GO:0016021(cellular_component:integral component of membrane)	0	0	0	COG2234(S:Function unknown)	COG2234(pigeon homolog (Drosophila))	PF04389.18(Peptidase_M28:Peptidase family M28); PF01546.29(Peptidase_M20:Peptidase family M20/M25/M40)	sp|Q7Z2K6|ERMP1_HUMAN(Endoplasmic reticulum metallopeptidase 1 OS=Homo sapiens OX=9606 GN=ERMP1 PE=1 SV=2)	114123829
LOC114130319	ring canal kelch homolog, transcript variant X3	2225	28	25	29	368.17	422	379.58	0.74	0.59	0.86	9.33	11.34	10.36	0.73	10.3433	12.9529	3.6952	2.27e-51	3.25e-48	yes	up	XP_027851068.1(ring canal kelch homolog [Aphis gossypii])	0	K10443;K10448	KLHL2_3;KLHL10	0	ENOG410XNX8(S:Function unknown)	ENOG410XNX8(kelch-like)	PF01344.26(Kelch_1:Kelch motif); PF07707.16(BACK:BTB And C-terminal Kelch); PF00651.32(BTB:BTB/POZ domain); PF13964.7(Kelch_6:Kelch motif); PF07646.16(Kelch_2:Kelch motif); PF13418.7(Kelch_4:Galactose oxidase, central domain); PF13415.7(Kelch_3:Galactose oxidase, central domain); PF11822.9(DUF3342:Domain of unknown function (DUF3342))	sp|Q70JS2|KELC_ANOST(Ring canal kelch homolog OS=Anopheles stephensi OX=30069 GN=kel PE=2 SV=2)	114130319
LOC114132365	glucose dehydrogenase [FAD, quinone]-like	1282	247.09	201.69	261.02	0	0	0	12.5	8.88	14.36	0	0	0	11.9133	0	0.000699914	-10.4805	4.06e-18	6.21e-16	yes	down	XP_027853618.1(LOW QUALITY PROTEIN: glucose dehydrogenase [FAD, quinone]-like [Aphis gossypii])	0	0	0	0	COG2303(E:Amino acid transport and metabolism)	COG2303(oxidoreductase)	PF00732.20(GMC_oxred_N:GMC oxidoreductase); PF13450.7(NAD_binding_8:NAD(P)-binding Rossmann-like domain); PF05834.13(Lycopene_cycl:Lycopene cyclase protein); PF07992.15(Pyr_redox_2:Pyridine nucleotide-disulphide oxidoreductase); PF01266.25(DAO:FAD dependent oxidoreductase)	sp|P18173|DHGL_DROME(Glucose dehydrogenase [FAD, quinone] OS=Drosophila melanogaster OX=7227 GN=Gld PE=3 SV=3)	114132365
LOC114131026	sorbitol dehydrogenase-like	1255	199.44	355.45	133.22	460.11	554.37	742.87	10.37	16.09	7.47	22.32	28.1	38.73	11.31	29.7167	2.34977	1.23252	2.63e-05	0.000646868	yes	up	XP_027851887.1(sorbitol dehydrogenase-like [Aphis gossypii])	GO:0005525(molecular_function:GTP binding); GO:0003924(molecular_function:GTPase activity); GO:0008270(molecular_function:zinc ion binding); GO:0016491(molecular_function:oxidoreductase activity)	K00008	SORD, gutB	map00040(Pentose and glucuronate interconversions); map00051(Fructose and mannose metabolism)	COG1063(E:Amino acid transport and metabolism)	COG1063(Dehydrogenase)	PF08240.13(ADH_N:Alcohol dehydrogenase GroES-like domain); PF00107.27(ADH_zinc_N:Zinc-binding dehydrogenase); PF16912.6(Glu_dehyd_C:Glucose dehydrogenase C-terminus); PF13602.7(ADH_zinc_N_2:Zinc-binding dehydrogenase); PF01262.22(AlaDh_PNT_C:Alanine dehydrogenase/PNT, C-terminal domain)	sp|Q00796|DHSO_HUMAN(Sorbitol dehydrogenase OS=Homo sapiens OX=9606 GN=SORD PE=1 SV=4)	114131026
LOC114123901	lipase member H-A-like	941	648	1191	559	2488	2323	2584	50.07	79.41	46.71	180.57	178.35	203.46	58.73	187.46	2.86058	1.51631	2.56e-11	1.93e-09	yes	up	XP_027842839.1(lipase member H-A-like [Aphis gossypii])	GO:0016021(cellular_component:integral component of membrane); GO:0005576(cellular_component:extracellular region); GO:0006629(biological_process:lipid metabolic process); GO:0052689(molecular_function:carboxylic ester hydrolase activity)	K14075;K14074;K19404	PNLIPRP2, PLRP2;PNLIPRP1, PLRP1;LIPH_I	map04972(Pancreatic secretion); map00561(Glycerolipid metabolism); map04975(Fat digestion and absorption)	ENOG410YGS3(S:Function unknown); ENOG4111AHY(O:Posttranslational modification, protein turnover, chaperones)	ENOG410YGS3(pancreatic triacylglycerol lipase); ENOG4111AHY(lipase member)	PF00151.20(Lipase:Lipase); PF00561.21(Abhydrolase_1:alpha/beta hydrolase fold); PF12697.8(Abhydrolase_6:Alpha/beta hydrolase family)	sp|Q6PA23|LIPHA_XENLA(Lipase member H-A OS=Xenopus laevis OX=8355 GN=liph-a PE=2 SV=1)	114123901
LOC114129370	aminopeptidase N-like	2771	2508	3199	2015	9524	6511	8738	50.57	56.77	44.51	181.27	130.94	179.92	50.6167	164.043	2.94826	1.55986	3.03e-14	3.16e-12	yes	up	XP_027849891.1(aminopeptidase N-like [Aphis gossypii])	GO:0004177(molecular_function:aminopeptidase activity); GO:0008270(molecular_function:zinc ion binding); GO:0008237(molecular_function:metallopeptidase activity)	K11140	ANPEP, CD13	map04640(Hematopoietic cell lineage); map00480(Glutathione metabolism); map04614(Renin-angiotensin system)	COG0308(E:Amino acid transport and metabolism)	COG0308(aminopeptidase)	PF01433.21(Peptidase_M1:Peptidase family M1 domain); PF11838.9(ERAP1_C:ERAP1-like C-terminal domain)	sp|P91887|AMPN_PLUXY(Aminopeptidase N OS=Plutella xylostella OX=51655 GN=APN1 PE=1 SV=1)	114129370
LOC114132551	uncharacterized LOC114132551	1555	551.98	701.91	507.97	49.86	43.97	46.16	20.5	22.38	20.55	1.17	1.09	1.17	21.1433	1.14333	0.0726676	-3.78254	8.36e-73	4.79e-69	yes	down	XP_027853840.1(uncharacterized protein LOC114132551 [Aphis gossypii])	GO:0016021(cellular_component:integral component of membrane); GO:0005576(cellular_component:extracellular region)	0	0	0	0	0	PF13930.7(Endonuclea_NS_2:DNA/RNA non-specific endonuclease); PF00030.20(Crystall:Beta/Gamma crystallin)	0	114132551
LOC114121074	uncharacterized LOC114121074	1877	7	3	16	44	35	53	0.22	0.08	0.55	1.31	1.1	1.71	0.283333	1.37333	4.53603	2.18143	0.000229899	0.00415739	yes	up	XP_027839032.1(uncharacterized protein LOC114121074 [Aphis gossypii])	0	0	0	0	ENOG41129R1(S:Function unknown)	ENOG41129R1(-)	0	0	114121074
LOC114127908	small ubiquitin-related modifier 2-like, transcript variant X1	404	1	3	5	21	29	16	0.26	1.03	1.33	8.58	10.46	7.18	0.873333	8.74	6.73422	2.75151	0.00040638	0.00658071	yes	up	XP_027848071.1(small ubiquitin-related modifier 2-like isoform X1 [Aphis gossypii])	GO:0005634(cellular_component:nucleus)	K12160	SUMO, SMT3	map03013(RNA transport); map05418(Fluid shear stress and atherosclerosis)	COG5227(O:Posttranslational modification, protein turnover, chaperones)	COG5227(smt3 suppressor of mif two 3 homolog)	PF11976.9(Rad60-SLD:Ubiquitin-2 like Rad60 SUMO-like); PF00240.24(ubiquitin:Ubiquitin family)	sp|Q6GPW2|SMO2B_XENLA(Small ubiquitin-related modifier 2-B OS=Xenopus laevis OX=8355 GN=sumo2-b PE=3 SV=1)	114127908
LOC114120194	uncharacterized LOC114120194	1234	0	2	4	15	14	17	0	0.09	0.23	0.75	0.74	0.92	0.106667	0.803333	7.02	2.81147	0.00256354	0.0300214	yes	up	XP_027837828.1(uncharacterized protein LOC114120194 [Aphis gossypii])	0	0	0	0	0	0	0	0	114120194
LOC114123800	uncharacterized LOC114123800	4342	753.07	1026.18	943.83	320.47	296.92	423.55	8.46	10.19	11.52	3.45	3.49	5.06	10.0567	4	0.347795	-1.52369	1.05e-19	2.01e-17	yes	down	XP_027842694.1(LOW QUALITY PROTEIN: uncharacterized protein LOC114123800 [Aphis gossypii])	0	K04730	IRAK1	map05140(Leishmaniasis); map05152(Tuberculosis); map05142(Chagas disease (American trypanosomiasis)); map05162(Measles); map05145(Toxoplasmosis); map05161(Hepatitis B); map05133(Pertussis); map04010(MAPK signaling pathway); map05168(Herpes simplex virus 1 infection); map05169(Epstein-Barr virus infection); map05135(Yersinia infection); map04620(Toll-like receptor signaling pathway); map05130(Path…	COG0515(T:Signal transduction mechanisms)	COG0515(Serine Threonine protein kinase)	PF01822.20(WSC:WSC domain); PF00069.26(Pkinase:Protein kinase domain); PF07714.18(PK_Tyr_Ser-Thr:Protein tyrosine and serine/threonine kinase); PF13855.7(LRR_8:Leucine rich repeat); PF14580.7(LRR_9:Leucine-rich repeat)	sp|Q05652|KPEL_DROME(Serine/threonine-protein kinase pelle OS=Drosophila melanogaster OX=7227 GN=pll PE=1 SV=1)	114123800
LOC114125607	uncharacterized LOC114125607	953	256	210	387	165	133	81	19.42	13.75	31.76	11.76	10.03	6.26	21.6433	9.35	0.405428	-1.30248	0.0001969	0.00365284	yes	down	XP_027845132.1(uncharacterized protein LOC114125607 [Aphis gossypii])	GO:0016021(cellular_component:integral component of membrane)	0	0	0	ENOG410Y7PV(S:Function unknown)	ENOG410Y7PV(-)	0	0	114125607
LOC114129779	uncharacterized LOC114129779	2006	51	65	110	40	40	32	1.77	1.89	4	1.22	1.4	1.15	2.55333	1.25667	0.451848	-1.14609	0.00320869	0.0360309	yes	down	KAF0773349.1(alpha-tocopherol transfer protein-like [Aphis craccivora])	GO:0016787(molecular_function:hydrolase activity)	0	0	0	ENOG410XRSQ(S:Function unknown)	ENOG410XRSQ(Transfer protein)	0	sp|Q9D3D0|TTPAL_MOUSE(Alpha-tocopherol transfer protein-like OS=Mus musculus OX=10090 GN=Ttpal PE=1 SV=3)	114129779
LOC114122748	eclosion hormone-like	568	73.92	96.35	100.89	199.71	229.75	164.55	13.49	14.66	19.46	33.94	41.39	30.5	15.87	35.2767	2.0095	1.00684	4.91e-05	0.00111983	yes	up	XP_027841305.1(eclosion hormone-like [Aphis gossypii])	GO:0008255(molecular_function:ecdysis-triggering hormone activity); GO:0007218(biological_process:neuropeptide signaling pathway); GO:0018990(biological_process:ecdysis, chitin-based cuticle)	0	0	0	ENOG41127VB(S:Function unknown)	ENOG41127VB(eclosion hormone)	PF04736.13(Eclosion:Eclosion hormone)	sp|P11919|ECLH_MANSE(Eclosion hormone OS=Manduca sexta OX=7130 PE=1 SV=2)	114122748
LOC114119380	uncharacterized LOC114119380	1223	162	141	163	66	35	31	22.47	16.77	23.87	7.61	4.92	3.52	21.0367	5.35	0.25954	-1.94597	4.47e-08	2.11e-06	yes	down	KAE9532184.1(hypothetical protein AGLY_010386 [Aphis glycines])	GO:0016021(cellular_component:integral component of membrane)	0	0	0	ENOG4111HQA(S:Function unknown)	ENOG4111HQA(Zinc finger protein)	0	0	114119380
LOC114128302	uncharacterized LOC114128302	662	1922	1494.67	1844	372.67	202	147.33	261.3	171.9	267.61	47.35	27.18	20.37	233.603	31.6333	0.126093	-2.98744	3.11e-19	5.66e-17	yes	down	XP_027848585.1(uncharacterized protein LOC114128301 [Aphis gossypii])	0	0	0	0	0	0	0	0	114128302
LOC114125147	ras-related protein Rab-43-like	1426	57.7	149.45	120.7	273.22	242.68	230.63	2.43	5.76	5.67	11.16	10.47	10.34	4.62	10.6567	2.11973	1.08388	0.000258664	0.00457652	yes	up	XP_027844470.1(ras-related protein Rab-43-like [Aphis gossypii])	GO:0003924(molecular_function:GTPase activity); GO:0005525(molecular_function:GTP binding)	K07930	RAB43	0	ENOG410XQN5(S:Function unknown)	ENOG410XQN5(member RAS oncogene family)	PF00071.23(Ras:Ras family); PF08477.14(Roc:Ras of Complex, Roc, domain of DAPkinase); PF00025.22(Arf:ADP-ribosylation factor family); PF00009.28(GTP_EFTU:Elongation factor Tu GTP binding domain); PF04670.13(Gtr1_RagA:Gtr1/RagA G protein conserved region); PF09439.11(SRPRB:Signal recognition particle receptor beta subunit); PF01926.24(MMR_HSR1:50S ribosome-binding GTPase)	sp|Q86YS6|RAB43_HUMAN(Ras-related protein Rab-43 OS=Homo sapiens OX=9606 GN=RAB43 PE=1 SV=1)	114125147
LOC114121798	coronin-2B-like, transcript variant X1	4088	824	1122	1065	1939	2264	2720	10.69	12.6	14.95	23.76	29.24	35.93	12.7467	29.6433	2.0876	1.06184	2.76e-13	2.59e-11	yes	up	XP_027840070.1(coronin-2B-like isoform X1 [Aphis gossypii])	0	K13887	CORO2	0	ENOG410XQAD(S:Function unknown)	ENOG410XQAD(Coronin, actin binding protein)	PF08953.12(DUF1899:Domain of unknown function (DUF1899)); PF16300.6(WD40_4:Type of WD40 repeat); PF00400.33(WD40:WD domain, G-beta repeat); PF12894.8(ANAPC4_WD40:Anaphase-promoting complex subunit 4 WD40 domain)	sp|Q6DJD8|COR2B_XENLA(Coronin-2B OS=Xenopus laevis OX=8355 GN=coro2b PE=2 SV=1)	114121798
LOC114126801	cadherin-89D-like	4864	711.78	741.69	900.57	559	316.71	312.4	7.58	6.82	10.18	5.41	3.37	3.25	8.19333	4.01	0.46414	-1.10737	6.98e-05	0.00151029	yes	down	XP_027846623.1(cadherin-89D-like [Aphis gossypii])	GO:0016021(cellular_component:integral component of membrane); GO:0007156(biological_process:homophilic cell adhesion via plasma membrane adhesion molecules); GO:0005509(molecular_function:calcium ion binding); GO:0005886(cellular_component:plasma membrane)	0	0	0	ENOG410XQHI(U:Intracellular trafficking, secretion, and vesicular transport)	ENOG410XQHI(Cadherins are calcium dependent cell adhesion proteins (By similarity))	PF00028.18(Cadherin:Cadherin domain); PF08758.12(Cadherin_pro:Cadherin prodomain like)	sp|Q9VEU1|CAD89_DROME(Cadherin-89D OS=Drosophila melanogaster OX=7227 GN=Cad89D PE=2 SV=3)	114126801
LOC114122944	uncharacterized LOC114122944	430	862	1064	716	479	304	416	300.86	295.48	253.46	154.67	103.03	146.2	283.267	134.633	0.416863	-1.26236	1.35e-08	6.85e-07	yes	down	KAF0774081.1(cuticle protein 19-like [Aphis craccivora])	GO:0042302(molecular_function:structural constituent of cuticle)	0	0	0	0	0	0	0	114122944
LOC114127157	lachesin-like	1638	2	0	3	88	120.87	75.01	0.07	0	0.11	3.06	4.29	2.83	0.06	3.39333	51.5405	5.68763	2.1e-14	2.21e-12	yes	up	XP_027847105.1(lachesin-like [Aphis gossypii])	0	0	0	0	ENOG4110N31(S:Function unknown)	ENOG4110N31(IGc2)	PF13927.7(Ig_3:Immunoglobulin domain); PF07679.17(I-set:Immunoglobulin I-set domain); PF00047.26(ig:Immunoglobulin domain); PF13895.7(Ig_2:Immunoglobulin domain); PF07686.18(V-set:Immunoglobulin V-set domain)	sp|Q24372|LACH_DROME(Lachesin OS=Drosophila melanogaster OX=7227 GN=Lac PE=1 SV=2)	114127157
LOC114119701	uncharacterized LOC114119701, transcript variant X1	2083	145	260	113	579	401	333	4.12	6.42	3.45	15.39	11.4	9.61	4.66333	12.1333	2.38075	1.25142	9.27e-05	0.00191507	yes	up	XP_027837176.1(uncharacterized protein LOC114119701 isoform X1 [Aphis gossypii])	GO:0016021(cellular_component:integral component of membrane)	0	0	0	ENOG410YMHR(T:Signal transduction mechanisms); ENOG410ZKXE(S:Function unknown)	ENOG410YMHR(Cyclin-Dependent Kinase); ENOG410ZKXE(Nucleoside H+ symporter)	PF12832.8(MFS_1_like:MFS_1 like family); PF07690.17(MFS_1:Major Facilitator Superfamily); PF01306.20(LacY_symp:LacY proton/sugar symporter)	sp|Q8CBH5|MFSD6_MOUSE(Major facilitator superfamily domain-containing protein 6 OS=Mus musculus OX=10090 GN=Mfsd6 PE=1 SV=1)	114119701
LOC114125357	myogenesis-regulating glycosidase-like	2067	15019.1	30360	14379.9	2439.77	2112.82	2143.36	422.63	750.43	442.57	64.81	59.32	61.62	538.543	61.9167	0.104676	-3.25599	3.74e-42	2.26e-39	yes	down	XP_027844772.1(myogenesis-regulating glycosidase-like [Aphis gossypii])	GO:0005975(biological_process:carbohydrate metabolic process); GO:0004553(molecular_function:hydrolase activity, hydrolyzing O-glycosyl compounds)	0	0	0	COG1501(G:Carbohydrate transport and metabolism)	COG1501(hydrolase, family 31)	PF01055.27(Glyco_hydro_31:Glycosyl hydrolases family 31)	sp|Q6NSJ0|MYORG_HUMAN(Myogenesis-regulating glycosidase OS=Homo sapiens OX=9606 GN=MYORG PE=1 SV=2)	114125357
LOC114119609	cation-independent mannose-6-phosphate receptor	4311	53	47	41	94	81	140	0.66	0.52	0.56	1.1	1	1.78	0.58	1.29333	2.00897	1.00646	0.00141977	0.0187818	yes	up	XP_027837019.1(cation-independent mannose-6-phosphate receptor [Aphis gossypii])	GO:0005520(molecular_function:insulin-like growth factor binding); GO:0016021(cellular_component:integral component of membrane); GO:0038023(molecular_function:signaling receptor activity); GO:0007041(biological_process:lysosomal transport); GO:0005537(molecular_function:mannose binding)	K06564	IGF2R, CD222	map04144(Endocytosis); map04142(Lysosome)	ENOG410ZWHP(U:Intracellular trafficking, secretion, and vesicular transport)	ENOG410ZWHP(Insulin-like growth factor 2 receptor)	PF00878.19(CIMR:Cation-independent mannose-6-phosphate receptor repeat); PF13015.7(PRKCSH_1:Glucosidase II beta subunit-like protein)	sp|P08169|MPRI_BOVIN(Cation-independent mannose-6-phosphate receptor OS=Bos taurus OX=9913 GN=IGF2R PE=1 SV=2)	114119609
LOC114127844	mutS protein homolog 5-like	2394	0	0	0	9	10	19	0	0	0	0.2	0.24	0.46	0	0.3	61.6905	5.94698	5.54e-05	0.00122982	yes	up	XP_027847979.1(mutS protein homolog 5-like [Aphis gossypii])	GO:0006298(biological_process:mismatch repair); GO:0005524(molecular_function:ATP binding); GO:0030983(molecular_function:mismatched DNA binding)	K08741	MSH5	0	COG0249(L:Replication, recombination and repair)	COG0249(that it carries out the mismatch recognition step. This protein has a weak ATPase activity (By similarity))	PF00488.22(MutS_V:MutS domain V); PF05192.19(MutS_III:MutS domain III)	sp|O43196|MSH5_HUMAN(MutS protein homolog 5 OS=Homo sapiens OX=9606 GN=MSH5 PE=1 SV=1)	114127844
LOC114121563	adhesive plaque matrix protein-like	687	18101.5	24644	20809	6994	6044.39	3837	2304.09	2661.05	2832.63	825.9	756.11	492.56	2599.26	691.523	0.246222	-2.02197	2.55e-17	3.61e-15	yes	down	XP_027839775.1(adhesive plaque matrix protein-like [Aphis gossypii])	0	0	0	0	ENOG410Z4TZ(S:Function unknown)	ENOG410Z4TZ(-)	0	0	114121563
LOC114124217	uncharacterized LOC114124217	1570	9	15	11	0	0	0	0.35	0.51	0.47	0	0	0	0.443333	0	0.0144927	-6.10853	2.67e-05	0.000653154	yes	down	XP_027843206.1(uncharacterized protein LOC114124217, partial [Aphis gossypii])	GO:0005634(cellular_component:nucleus); GO:0003677(molecular_function:DNA binding)	0	0	0	ENOG4111YDA(S:Function unknown); ENOG410ZQ61(S:Function unknown); ENOG41120I4(S:Function unknown)	ENOG4111YDA(-); ENOG410ZQ61(-); ENOG41120I4(helix-turn-helix, Psq domain)	PF03184.20(DDE_1:DDE superfamily endonuclease); PF03221.17(HTH_Tnp_Tc5:Tc5 transposase DNA-binding domain); PF05225.17(HTH_psq:helix-turn-helix, Psq domain)	sp|Q96MW7|TIGD1_HUMAN(Tigger transposable element-derived protein 1 OS=Homo sapiens OX=9606 GN=TIGD1 PE=1 SV=1)	114124217
LOC114127203	uncharacterized LOC114127203, transcript variant X3	1582	147	129	123	56	64	53	4.04	3.27	4.11	1.56	1.86	1.61	3.80667	1.67667	0.392361	-1.34975	3.71e-07	1.43e-05	yes	down	XP_027847182.1(uncharacterized protein LOC114127203 [Aphis gossypii])	GO:0005634(cellular_component:nucleus); GO:0006302(biological_process:double-strand break repair)	K10980	NHEJ1, XLF	map03450(Non-homologous end-joining)	0	0	PF09302.12(XLF:XLF-Cernunnos, XRcc4-like factor, NHEJ component)	0	114127203
LOC114127696	UDP-glucuronosyltransferase 2B2-like, transcript variant X1	1974	1447	2718	2199	530	575	682	39.59	67.52	66.89	14.56	16.38	20.25	58	17.0633	0.257916	-1.95503	1.04e-24	2.78e-22	yes	down	XP_027847820.1(UDP-glucuronosyltransferase 2B2-like isoform X1 [Aphis gossypii])	GO:0015020(molecular_function:glucuronosyltransferase activity); GO:0016740(molecular_function:transferase activity); GO:0016021(cellular_component:integral component of membrane)	K00699	UGT	map05204(Chemical carcinogenesis); map00983(Drug metabolism - other enzymes); map00982(Drug metabolism - cytochrome P450); map00980(Metabolism of xenobiotics by cytochrome P450); map00040(Pentose and glucuronate interconversions); map00860(Porphyrin and chlorophyll metabolism); map00053(Ascorbate and aldarate metabolism); map00830(Retinol metabolism); map00140(Steroid hormone biosynthesis)	COG1819(S:Function unknown)	COG1819(Transferase)	PF00201.19(UDPGT:UDP-glucoronosyl and UDP-glucosyl transferase); PF04101.17(Glyco_tran_28_C:Glycosyltransferase family 28 C-terminal domain)	sp|P08541|UD2B2_RAT(UDP-glucuronosyltransferase 2B2 OS=Rattus norvegicus OX=10116 GN=Ugt2b PE=1 SV=1)	114127696
LOC114129208	uncharacterized LOC114129208	1165	0	0	0	23	38	21	0	0	0	1.24	2.17	1.23	0	1.54667	135.162	7.07854	1.08e-07	4.74e-06	yes	up	XP_027849662.1(uncharacterized protein LOC114129208 [Aphis gossypii])	0	K08471	GR	0	ENOG410YSCH(S:Function unknown)	ENOG410YSCH(Reverse transcriptase (RNA-dependent DNA polymerase))	PF08395.13(7tm_7:7tm Chemosensory receptor)	0	114129208
LOC114122027	pyridine nucleotide-disulfide oxidoreductase domain-containing protein 1-like	1284	0	0	0	14.36	14.37	16.88	0	0	0	0.68	0.72	0.87	0	0.756667	73.885	6.20721	1.05e-05	0.000292532	yes	up	XP_027840374.1(LOW QUALITY PROTEIN: pyridine nucleotide-disulfide oxidoreductase domain-containing protein 1-like, partial [Aphis gossypii])	GO:0003735(molecular_function:structural constituent of ribosome); GO:0005840(cellular_component:ribosome); GO:0006412(biological_process:translation); GO:0016491(molecular_function:oxidoreductase activity)	0	0	0	COG0446(S:Function unknown); ENOG410XZAZ(S:Function unknown)	COG0446(pyridine nucleotide-disulfide oxidoreductase); ENOG410XZAZ(pyridine nucleotide-disulphide oxidoreductase domain 1)	PF07992.15(Pyr_redox_2:Pyridine nucleotide-disulphide oxidoreductase); PF18267.2(Rubredoxin_C:Rubredoxin NAD+ reductase C-terminal domain); PF13738.7(Pyr_redox_3:Pyridine nucleotide-disulphide oxidoreductase)	sp|Q5REJ2|PYRD1_PONAB(Pyridine nucleotide-disulfide oxidoreductase domain-containing protein 1 OS=Pongo abelii OX=9601 GN=PYROXD1 PE=2 SV=1)	114122027
LOC114126233	uncharacterized LOC114126233	360	0	8.12	0	34.47	34.62	51.86	0	3.89	0	19.78	21.1	33.1	1.29667	24.66	14.2866	3.83659	6.01e-06	0.000180036	yes	up	XP_022164833.1(translocon-associated protein subunit gamma [Myzus persicae])	GO:0016021(cellular_component:integral component of membrane); GO:0006614(biological_process:SRP-dependent cotranslational protein targeting to membrane); GO:0005783(cellular_component:endoplasmic reticulum)	K13251	SSR3	map04141(Protein processing in endoplasmic reticulum)	ENOG410XR1X(U:Intracellular trafficking, secretion, and vesicular transport)	ENOG410XR1X(signal sequence receptor, gamma (translocon-associated protein gamma))	0	sp|Q9UNL2|SSRG_HUMAN(Translocon-associated protein subunit gamma OS=Homo sapiens OX=9606 GN=SSR3 PE=1 SV=1)	114126233
LOC114130782	UDP-glucose 4-epimerase-like, transcript variant X1	1850	4511	5732	5371	2553.74	2734	2921	151.55	172.62	196.66	81.93	92.01	103.02	173.61	92.32	0.478762	-1.06262	3.84e-23	8.79e-21	yes	down	XP_027851639.1(UDP-glucose 4-epimerase-like isoform X1 [Aphis gossypii])	GO:0006012(biological_process:galactose metabolic process); GO:0003978(molecular_function:UDP-glucose 4-epimerase activity)	K01784	galE, GALE	map00520(Amino sugar and nucleotide sugar metabolism); map00052(Galactose metabolism)	COG1087(M:Cell wall/membrane/envelope biogenesis)	COG1087(udp-glucose 4-epimerase)	PF16363.6(GDP_Man_Dehyd:GDP-mannose 4,6 dehydratase); PF01370.22(Epimerase:NAD dependent epimerase/dehydratase family); PF01073.20(3Beta_HSD:3-beta hydroxysteroid dehydrogenase/isomerase family); PF02719.16(Polysacc_synt_2:Polysaccharide biosynthesis protein); PF04321.18(RmlD_sub_bind:RmlD substrate binding domain); PF13460.7(NAD_binding_10:NAD(P)H-binding); PF07993.13(NAD_binding_4:Male sterilit…	sp|Q9W0P5|GALE_DROME(UDP-glucose 4-epimerase OS=Drosophila melanogaster OX=7227 GN=Gale PE=1 SV=1)	114130782
LOC114120285	uncharacterized LOC114120285	732	3.09	5.59	5.27	77.5	131.66	89.63	0.35	0.54	0.65	8.29	14.9	10.42	0.513333	11.2033	19.5485	4.28899	1.07e-16	1.42e-14	yes	up	KAE9527377.1(hypothetical protein AGLY_013075 [Aphis glycines])	0	0	0	0	0	0	0	0	114120285
LOC114122664	trans-1,2-dihydrobenzene-1,2-diol dehydrogenase-like	1482	2005	1990	1838	992.39	932.37	1236.16	64.11	55.76	64.35	29.95	29.71	40.28	61.4067	33.3133	0.489294	-1.03123	6.98e-12	5.8e-10	yes	down	XP_027841195.1(trans-1,2-dihydrobenzene-1,2-diol dehydrogenase-like [Aphis gossypii])	GO:0016491(molecular_function:oxidoreductase activity)	K00078	DHDH	map00040(Pentose and glucuronate interconversions); map00980(Metabolism of xenobiotics by cytochrome P450)	COG0673(S:Function unknown)	COG0673(oxidoreductase)	PF01408.23(GFO_IDH_MocA:Oxidoreductase family, NAD-binding Rossmann fold); PF02894.18(GFO_IDH_MocA_C:Oxidoreductase family, C-terminal alpha/beta domain)	sp|Q6DKE0|DHDH_XENLA(Trans-1,2-dihydrobenzene-1,2-diol dehydrogenase OS=Xenopus laevis OX=8355 GN=dhdh PE=2 SV=1)	114122664
LOC114127615	maltase 1-like	638	220.39	385.22	254.89	124	125.11	155.56	20.27	29.74	25.77	12.54	13.31	16.95	25.26	14.2667	0.432635	-1.20878	3.87e-08	1.88e-06	yes	down	XP_027847705.1(maltase 1-like, partial [Aphis gossypii])	GO:0003824(molecular_function:catalytic activity); GO:0016021(cellular_component:integral component of membrane); GO:0005975(biological_process:carbohydrate metabolic process); GO:0016787(molecular_function:hydrolase activity)	K01187	malZ	map00500(Starch and sucrose metabolism); map00052(Galactose metabolism)	COG0366(G:Carbohydrate transport and metabolism)	COG0366(alpha amylase, catalytic)	PF00128.25(Alpha-amylase:Alpha amylase, catalytic domain); PF14701.7(hDGE_amylase:Glycogen debranching enzyme, glucanotransferase domain)	sp|O16098|MAL1_DROVI(Maltase 1 OS=Drosophila virilis OX=7244 GN=Mal-B1 PE=3 SV=2)	114127615
LOC114127613	maltase 2-like	767	10.64	40.83	24.59	0	4.36	2.05	1.73	5.58	4.25	0	0.46	0.22	3.85333	0.226667	0.0722129	-3.7916	2.58e-05	0.00063829	yes	down	XP_027847703.1(maltase 2-like [Aphis gossypii])	GO:0003824(molecular_function:catalytic activity); GO:0005975(biological_process:carbohydrate metabolic process); GO:0016787(molecular_function:hydrolase activity)	K01187	malZ	map00500(Starch and sucrose metabolism); map00052(Galactose metabolism)	COG0366(G:Carbohydrate transport and metabolism)	COG0366(alpha amylase, catalytic)	PF00128.25(Alpha-amylase:Alpha amylase, catalytic domain)	sp|O16098|MAL1_DROVI(Maltase 1 OS=Drosophila virilis OX=7244 GN=Mal-B1 PE=3 SV=2)	114127613
LOC114131162	sterile alpha and TIR motif-containing protein 1-like	1250	68.86	92.88	66	189.64	225.91	195.88	3.6	4.23	3.75	9.33	11.75	10.44	3.86	10.5067	2.45422	1.29526	7.16e-09	3.82e-07	yes	up	XP_027852124.1(sterile alpha and TIR motif-containing protein 1-like [Aphis gossypii])	GO:0035591(molecular_function:signaling adaptor activity); GO:0048678(biological_process:response to axon injury); GO:0034128(biological_process:negative regulation of MyD88-independent toll-like receptor signaling pathway); GO:0007165(biological_process:signal transduction)	0	0	0	ENOG410XQ4A(S:Function unknown)	ENOG410XQ4A(Sterile alpha and TIR motif containing 1)	PF07647.18(SAM_2:SAM domain (Sterile alpha motif)); PF00536.31(SAM_1:SAM domain (Sterile alpha motif)); PF13676.7(TIR_2:TIR domain)	sp|Q6IDD9|SARM1_DROME(NAD(+) hydrolase sarm1 OS=Drosophila melanogaster OX=7227 GN=Ect4 PE=1 SV=1)	114131162
LOC114120282	uncharacterized LOC114120282, transcript variant X3	2322	112.91	113.41	123.73	340.5	341.34	314.37	3.43	3.21	3.96	15.11	15.65	15.41	3.53333	15.39	2.5875	1.37156	5.29e-12	4.46e-10	yes	up	XP_027837948.1(uncharacterized protein LOC114120282 isoform X2 [Aphis gossypii])	0	0	0	0	ENOG4111V7I(S:Function unknown); COG1599(S:Function unknown)	ENOG4111V7I(-); COG1599(-)	PF01336.26(tRNA_anti-codon:OB-fold nucleic acid binding domain)	0	114120282
LOC114128038	cilia- and flagella-associated protein 45-like	1732	3	2	1	18	9	23	0.1	0.06	0.04	0.59	0.31	0.82	0.0666667	0.573333	7.51907	2.91055	0.00140946	0.0187031	yes	up	XP_027848250.1(cilia- and flagella-associated protein 45-like [Aphis gossypii])	0	0	0	0	ENOG410YV97(S:Function unknown)	ENOG410YV97(coiled-coil domain containing 19)	PF13868.7(TPH:Trichohyalin-plectin-homology domain)	sp|Q9UL16|CFA45_HUMAN(Cilia- and flagella-associated protein 45 OS=Homo sapiens OX=9606 GN=CFAP45 PE=1 SV=2)	114128038
LOC114124338	gamma-glutamyl hydrolase-like, transcript variant X1	1238	135.91	92.53	92.1	22.89	27.05	12.66	27.16	15.65	14.88	7.67	8.59	1.54	19.23	5.93333	0.177277	-2.49592	3.9e-10	2.63e-08	yes	down	XP_027843366.1(gamma-glutamyl hydrolase-like isoform X1 [Aphis gossypii])	GO:0034722(molecular_function:gamma-glutamyl-peptidase activity)	K01307	GGH	map01523(Antifolate resistance); map00790(Folate biosynthesis)	ENOG410XQKI(S:Function unknown)	ENOG410XQKI(Gamma-glutamyl hydrolase)	PF07722.14(Peptidase_C26:Peptidase C26); PF00117.29(GATase:Glutamine amidotransferase class-I)	sp|Q9Z0L8|GGH_MOUSE(Gamma-glutamyl hydrolase OS=Mus musculus OX=10090 GN=Ggh PE=1 SV=2)	114124338
LOC114123108	uncharacterized LOC114123108	503	125	106	115	12	7	17	24.3	18.94	24.77	2.09	1.44	3.49	22.67	2.34	0.0935362	-3.41833	1.21e-18	2.07e-16	yes	down	XP_027841773.1(uncharacterized protein LOC114123108 [Aphis gossypii])	0	0	0	0	0	0	0	0	114123108
LOC114129046	neuroglian-like	2003	125.3	147.05	160.78	892.82	886.96	1209.58	3.66	3.77	5.14	24.61	25.84	36.09	4.19	28.8467	6.2488	2.64358	1.3e-48	1.24e-45	yes	up	XP_027849469.1(neuroglian-like [Aphis gossypii])	GO:0016021(cellular_component:integral component of membrane)	K06756	NRCAM	map04514(Cell adhesion molecules (CAMs))	ENOG410XSVG(S:Function unknown)	ENOG410XSVG(Cell adhesion molecule)	PF13927.7(Ig_3:Immunoglobulin domain); PF07679.17(I-set:Immunoglobulin I-set domain); PF00047.26(ig:Immunoglobulin domain); PF13895.7(Ig_2:Immunoglobulin domain); PF08205.13(C2-set_2:CD80-like C2-set immunoglobulin domain)	sp|P20241|NRG_DROME(Neuroglian OS=Drosophila melanogaster OX=7227 GN=Nrg PE=1 SV=2)	114129046
LOC114125612	uncharacterized LOC114125612, transcript variant X1	1826	21	34	18	54	75	58	0.66	0.93	0.64	1.6	2.39	1.9	0.743333	1.96333	2.35145	1.23355	0.00104458	0.0145872	yes	up	XP_027845142.1(uncharacterized protein LOC114125612 [Aphis gossypii])	GO:0003676(molecular_function:nucleic acid binding)	0	0	0	0	0	PF13815.7(Dzip-like_N:Iguana/Dzip1-like DAZ-interacting protein N-terminal)	0	114125612
LOC114123199	sedoheptulokinase-like	1505	148.87	172.5	184	72.47	92	110	5.73	5.81	7.59	2.82	3.78	4.52	6.37667	3.70667	0.489342	-1.03109	6.19e-06	0.000184243	yes	down	XP_027841898.1(sedoheptulokinase-like [Aphis gossypii])	GO:0005975(biological_process:carbohydrate metabolic process); GO:0050277(molecular_function:sedoheptulokinase activity)	K11214	SHPK	0	COG1070(G:Carbohydrate transport and metabolism); COG0554(C:Energy production and conversion)	COG1070(Carbohydrate kinase); COG0554(Key enzyme in the regulation of glycerol uptake and metabolism (By similarity))	PF00370.22(FGGY_N:FGGY family of carbohydrate kinases, N-terminal domain)	sp|Q9D5J6|SHPK_MOUSE(Sedoheptulokinase OS=Mus musculus OX=10090 GN=Shpk PE=1 SV=1)	114123199
LOC114132540	neprilysin-2	3121	8140	7591	9196	4949	3739	3143	143.81	118.13	178.06	82.55	65.89	56.71	146.667	68.3833	0.433836	-1.20478	1.08e-07	4.74e-06	yes	down	XP_027853825.1(neprilysin-2 [Aphis gossypii])	GO:0016021(cellular_component:integral component of membrane); GO:0004222(molecular_function:metalloendopeptidase activity)	K08635	MMEL1, NEP	0	COG3590(O:Posttranslational modification, protein turnover, chaperones)	COG3590(endothelin-converting enzyme)	PF05649.14(Peptidase_M13_N:Peptidase family M13); PF01431.22(Peptidase_M13:Peptidase family M13)	sp|A0A0B4K692|NEP2_DROME(Neprilysin-2 OS=Drosophila melanogaster OX=7227 GN=Nep2 PE=1 SV=1)	114132540
LOC114132919	GDP-D-glucose phosphorylase 1-like	1112	0	0	0	31.07	75.26	45.71	0	0	0	1.79	4.57	2.85	0	3.07	248.579	7.95756	6.51e-10	4.22e-08	yes	up	XP_027854360.1(GDP-D-glucose phosphorylase 1-like [Aphis gossypii])	GO:0080048(molecular_function:GDP-D-glucose phosphorylase activity)	K15630	VTC2	0	ENOG4111FR6(S:Function unknown)	ENOG4111FR6(GDP-D-glucose phosphorylase)	0	sp|Q08CA1|GDPP1_DANRE(GDP-D-glucose phosphorylase 1 OS=Danio rerio OX=7955 GN=gdpgp1 PE=2 SV=1)	114132919
LOC114123930	protein ZBED8-like	1340	5	4	6	0	0	0	0.24	0.17	0.31	0	0	0	0.24	0	0.0331268	-4.91586	0.0049975	0.0498413	yes	down	XP_027842870.1(protein ZBED8-like, partial [Aphis gossypii])	GO:0046983(molecular_function:protein dimerization activity)	0	0	0	ENOG4110WD6(S:Function unknown); ENOG410XSSW(S:Function unknown)	ENOG4110WD6(ADAM metallopeptidase with thrombospondin type 1, motif); ENOG410XSSW(ADAM metallopeptidase with thrombospondin type 1, motif)	PF14291.7(DUF4371:Domain of unknown function (DUF4371))	sp|O60290|ZN862_HUMAN(Zinc finger protein 862 OS=Homo sapiens OX=9606 GN=ZNF862 PE=2 SV=2)	114123930
LOC114132909	glucose dehydrogenase [FAD, quinone]-like	2189	43	32	51	17	5	7	1.13	0.74	1.47	0.42	0.13	0.19	1.11333	0.246667	0.210171	-2.25037	8.63e-05	0.00179237	yes	down	XP_027854320.1(glucose dehydrogenase [FAD, quinone]-like [Aphis gossypii])	GO:0050660(molecular_function:flavin adenine dinucleotide binding); GO:0016614(molecular_function:oxidoreductase activity, acting on CH-OH group of donors)	0	0	0	COG2303(K:Transcription)	COG2303(asunder, spermatogenesis regulator homolog (Drosphila))	PF00732.20(GMC_oxred_N:GMC oxidoreductase); PF05199.14(GMC_oxred_C:GMC oxidoreductase)	sp|P18173|DHGL_DROME(Glucose dehydrogenase [FAD, quinone] OS=Drosophila melanogaster OX=7227 GN=Gld PE=3 SV=3)	114132909
LOC114119133	A-kinase anchor protein 14-like	503	27	28	45	11997	798	9	6.44	5.47	11.21	2653.22	187.25	2.18	7.70667	947.55	123.729	6.95103	0.000164278	0.00313386	yes	up	KAF0771271.1(A-kinase anchor protein 14-like [Aphis craccivora])	0	0	0	0	0	0	0	0	114119133
LOC114129641	uncharacterized LOC114129641	1311	178	160	147	9	7	13	8.75	6.85	7.86	0.42	0.34	0.65	7.82	0.47	0.0538902	-4.21383	2.41e-29	8.64e-27	yes	down	XP_027850243.1(uncharacterized protein LOC114129641 [Aphis gossypii])	GO:0016021(cellular_component:integral component of membrane)	0	0	0	0	0	PF13930.7(Endonuclea_NS_2:DNA/RNA non-specific endonuclease)	0	114129641
LOC114126606	uncharacterized LOC114126606	1182	14	18	18	0	0	0	0.79	0.88	1.1	0	0	0	0.923333	0	0.0100616	-6.63499	1.35e-06	4.61e-05	yes	down	XP_027846392.1(uncharacterized protein LOC114126606 [Aphis gossypii])	GO:0046872(molecular_function:metal ion binding); GO:0003676(molecular_function:nucleic acid binding); GO:0003677(molecular_function:DNA binding)	0	0	0	ENOG410ZN72(S:Function unknown)	ENOG410ZN72(conserved hypothetical protein)	PF03184.20(DDE_1:DDE superfamily endonuclease)	0	114126606
LOC114127036	zinc finger homeobox protein 3-like	2273	0	0	0	52.93	0.59	46.91	0	0	0	1.26	0.01	1.21	0	0.826667	167.822	7.39079	0.00214007	0.0260836	yes	up	XP_027846929.1(zinc finger homeobox protein 3-like [Aphis gossypii])	GO:0006355(biological_process:regulation of transcription, DNA-templated); GO:0005634(cellular_component:nucleus); GO:0007275(biological_process:multicellular organism development); GO:0003677(molecular_function:DNA binding)	K15608	PAX2	0	ENOG410ZT0S(K:Transcription)	ENOG410ZT0S(Paired box)	0	0	114127036
LOC114132671	uncharacterized LOC114132671	441	10	8	5	0	0	0	3.05	1.96	1.57	0	0	0	2.19333	0	0.0216552	-5.52915	0.000516799	0.00801076	yes	down	XP_027853997.1(uncharacterized protein LOC114132671 [Aphis gossypii])	0	0	0	0	ENOG410XQCA(D:Cell cycle control, cell division, chromosome partitioning); ENOG410XQCA(Z:Cytoskeleton); ENOG410Z6YD(S:Function unknown)	ENOG410XQCA(Cell division control protein); ENOG410XQCA(Cell division control protein); ENOG410Z6YD(-)	PF16064.6(DUF4806:Domain of unknown function (DUF4806))	0	114132671
LOC114132505	arylsulfatase B-like	1855	438	592	559	312	260	207	14.02	16.61	19.54	9.42	8.29	6.76	16.7233	8.15667	0.451985	-1.14565	2.33e-07	9.34e-06	yes	down	XP_027853781.1(arylsulfatase B-like [Aphis gossypii])	GO:0016021(cellular_component:integral component of membrane); GO:0008484(molecular_function:sulfuric ester hydrolase activity)	0	0	0	COG3119(P:Inorganic ion transport and metabolism)	COG3119(Sulfatase)	PF00884.24(Sulfatase:Sulfatase); PF01663.23(Phosphodiest:Type I phosphodiesterase / nucleotide pyrophosphatase)	sp|P50430|ARSB_RAT(Arylsulfatase B OS=Rattus norvegicus OX=10116 GN=Arsb PE=2 SV=2)	114132505
LOC114121591	putative glutathione-specific gamma-glutamylcyclotransferase 2	721	4.9	0	0	44.23	89.21	39.08	0.57	0	0	4.85	10.36	4.66	0.19	6.62333	30.5729	4.93418	1.46e-08	7.39e-07	yes	up	XP_027839798.1(putative glutathione-specific gamma-glutamylcyclotransferase 2 [Aphis gossypii])	GO:0061928(molecular_function:glutathione specific gamma-glutamylcyclotransferase activity); GO:0006751(biological_process:glutathione catabolic process); GO:0016740(molecular_function:transferase activity); GO:0003839(molecular_function:gamma-glutamylcyclotransferase activity)	K15627;K07232	ASPSCR1, ASPL;CHAC, chaC	map00480(Glutathione metabolism); map05202(Transcriptional misregulation in cancer)	COG3703(P:Inorganic ion transport and metabolism)	COG3703(cation transport)	PF04752.13(ChaC:ChaC-like protein); PF06094.13(GGACT:Gamma-glutamyl cyclotransferase, AIG2-like)	sp|Q5ZI66|CHAC2_CHICK(Putative glutathione-specific gamma-glutamylcyclotransferase 2 OS=Gallus gallus OX=9031 GN=chac2 PE=2 SV=1)	114121591
LOC114124248	uncharacterized LOC114124248	2037	23.01	20	25	72.66	66	82	0.66	0.5	0.78	1.96	1.89	2.4	0.646667	2.08333	2.93965	1.55565	7.12e-06	0.000209262	yes	up	KAE9545636.1(hypothetical protein AGLY_001179 [Aphis glycines])	0	K10443	KLHL2_3	0	ENOG410XNX8(S:Function unknown); COG2801(L:Replication, recombination and repair)	ENOG410XNX8(kelch-like); COG2801(Retrotransposon protein)	0	sp|Q70JS2|KELC_ANOST(Ring canal kelch homolog OS=Anopheles stephensi OX=30069 GN=kel PE=2 SV=2)	114124248
LOC114127278	uncharacterized LOC114127278	3163	5256	6180	6582	3257	1812	1116	71.41	76.51	99.59	42.98	25.1	16.39	82.5033	28.1567	0.320145	-1.6432	0.00106109	0.0147638	yes	down	XP_027847270.1(uncharacterized protein LOC114127278 [Aphis gossypii])	GO:0016021(cellular_component:integral component of membrane)	0	0	0	ENOG410Y5YZ(S:Function unknown)	ENOG410Y5YZ(ZP)	PF00100.24(Zona_pellucida:Zona pellucida-like domain)	0	114127278
LOC114127702	uncharacterized LOC114127702	1836	70	105	75	9	21	28	2.27	2.98	2.65	0.27	0.68	0.93	2.63333	0.626667	0.209977	-2.2517	1.31e-08	6.66e-07	yes	down	XP_027847830.1(LOW QUALITY PROTEIN: uncharacterized protein LOC114127702, partial [Aphis gossypii])	0	0	0	0	COG0457(S:Function unknown); ENOG410Y2HQ(S:Function unknown); ENOG410Y2PF(S:Function unknown)	COG0457(repeat-containing protein); ENOG410Y2HQ(-); ENOG410Y2PF(-)	PF12259.9(Baculo_F:Baculovirus F protein)	sp|Q9YMJ7|ENV_NPVLD(Envelope fusion protein OS=Lymantria dispar multicapsid nuclear polyhedrosis virus OX=10449 GN=LdOrf-130 PE=3 SV=1)	114127702
LOC114128385	glutathione-specific gamma-glutamylcyclotransferase 1-like	1436	572.52	837.06	600.7	377.05	271.56	385.42	25.01	31.93	28.56	15.54	11.83	17.15	28.5	14.84	0.472321	-1.08216	4.12e-08	1.98e-06	yes	down	XP_027848697.1(glutathione-specific gamma-glutamylcyclotransferase 1-like [Aphis gossypii])	GO:0061928(molecular_function:glutathione specific gamma-glutamylcyclotransferase activity); GO:0006751(biological_process:glutathione catabolic process); GO:0016740(molecular_function:transferase activity); GO:0003839(molecular_function:gamma-glutamylcyclotransferase activity)	K07232	CHAC, chaC	map00480(Glutathione metabolism)	COG3703(P:Inorganic ion transport and metabolism)	COG3703(cation transport)	PF04752.13(ChaC:ChaC-like protein); PF06094.13(GGACT:Gamma-glutamyl cyclotransferase, AIG2-like)	sp|Q5SPB6|CHAC1_DANRE(Glutathione-specific gamma-glutamylcyclotransferase 1 OS=Danio rerio OX=7955 GN=chac1 PE=3 SV=1)	114128385
LOC114129138	uncharacterized LOC114129138	1304	21.95	30.96	54.21	106.93	78.79	89.65	1.09	1.33	2.92	4.98	3.88	4.52	1.78	4.46	2.358	1.23756	0.00137866	0.0183795	yes	up	XP_027849577.1(uncharacterized protein LOC114129138 [Aphis gossypii])	0	K17478	FKBP15, WAFL	0	ENOG410ZIE4(S:Function unknown); COG0545(O:Posttranslational modification, protein turnover, chaperones)	ENOG410ZIE4(-); COG0545(Peptidyl-prolyl cis-trans isomerase)	0	0	114129138
LOC114132534	cholinesterase-like	810	11.65	2.69	16.85	38.66	25.49	73.94	1.13	0.22	1.76	3.51	2.45	7.3	1.03667	4.42	3.77474	1.91638	0.00316245	0.0356515	yes	up	XP_027853817.1(cholinesterase-like [Aphis gossypii])	0	K01050;K01049	BCHE;ACHE	map00564(Glycerophospholipid metabolism); map04725(Cholinergic synapse)	COG2272(I:Lipid transport and metabolism)	COG2272(Carboxylesterase)	PF00135.29(COesterase:Carboxylesterase family)	0	114132534
LOC114128318	uncharacterized LOC114128318	750	343	175	327	101	29	34	21.39	10.28	20.97	5.92	2.11	2.51	17.5467	3.51333	0.177315	-2.49562	2.26e-07	9.1e-06	yes	down	XP_027848603.1(uncharacterized protein LOC114128318 [Aphis gossypii])	GO:0016021(cellular_component:integral component of membrane)	0	0	0	ENOG410Y5TC(S:Function unknown)	ENOG410Y5TC(-)	0	0	114128318
LOC114123601	inhibitor of growth protein 5-like	1388	20	31	22	64	71	57	0.91	1.24	1.09	2.75	3.23	2.66	1.08	2.88	2.41552	1.27233	0.000344183	0.0057439	yes	up	XP_027842442.1(inhibitor of growth protein 5-like [Aphis gossypii])	GO:0008285(biological_process:negative regulation of cell proliferation); GO:0035064(molecular_function:methylated histone binding); GO:0005634(cellular_component:nucleus); GO:0043065(biological_process:positive regulation of apoptotic process); GO:0016573(biological_process:histone acetylation); GO:0046872(molecular_function:metal ion binding)	K11346	ING4	0	COG5034(B:Chromatin structure and dynamics)	COG5034(Inhibitor of growth family member)	PF12998.8(ING:Inhibitor of growth proteins N-terminal histone-binding); PF00628.30(PHD:PHD-finger)	sp|Q9D8Y8|ING5_MOUSE(Inhibitor of growth protein 5 OS=Mus musculus OX=10090 GN=Ing5 PE=1 SV=1)	114123601
LOC114132278	maltase 2-like	1928	316.38	497.94	450.61	2061.4	2741.12	1709	9.66	13.35	15.01	59.28	83.23	53.08	12.6733	65.1967	4.73883	2.24453	2.67e-24	6.95e-22	yes	up	XP_027853491.1(LOW QUALITY PROTEIN: maltase 2-like [Aphis gossypii])	GO:0003824(molecular_function:catalytic activity); GO:0005975(biological_process:carbohydrate metabolic process)	0	0	0	COG0366(G:Carbohydrate transport and metabolism)	COG0366(alpha amylase, catalytic)	PF00128.25(Alpha-amylase:Alpha amylase, catalytic domain)	sp|O16099|MAL2_DROVI(Maltase 2 OS=Drosophila virilis OX=7244 GN=Mal-B2 PE=3 SV=2)	114132278
LOC114124098	uncharacterized LOC114124098	1560	192	178	198	86	73	25	5.11	5.12	6.37	2.29	1.91	0.9	5.53333	1.7	0.298675	-1.74335	1.83e-05	0.000469688	yes	down	XP_027843077.1(uncharacterized protein LOC114124098 [Aphis gossypii])	GO:0004252(molecular_function:serine-type endopeptidase activity); GO:0016021(cellular_component:integral component of membrane)	0	0	0	0	0	PF00089.27(Trypsin:Trypsin)	0	114124098
LOC114127015	elongin-C-like	1342	2	3	2	15	25	17	0.1	0.12	0.1	0.67	1.19	0.83	0.106667	0.896667	7.4275	2.89288	0.000375218	0.00618975	yes	up	XP_027846893.1(elongin-C-like [Aphis gossypii])	GO:0006511(biological_process:ubiquitin-dependent protein catabolic process)	K03872	ELOC, TCEB1	map05170(Human immunodeficiency virus 1 infection); map04120(Ubiquitin mediated proteolysis); map05211(Renal cell carcinoma); map04066(HIF-1 signaling pathway); map05200(Pathways in cancer)	ENOG41123WR(K:Transcription)	ENOG41123WR(Transcription elongation factor B (SIII), polypeptide 1 (15kDa, elongin C))	PF03931.16(Skp1_POZ:Skp1 family, tetramerisation domain)	sp|Q2KII4|ELOC_BOVIN(Elongin-C OS=Bos taurus OX=9913 GN=ELOC PE=1 SV=1)	114127015
LOC114125253	zinc finger BED domain-containing protein 1-like	1581	0	0	0	17	16	14	0	0	0	1.66	0.62	1.09	0	1.12333	77.7393	6.28057	7.5e-06	0.000218217	yes	up	XP_027844630.1(zinc finger BED domain-containing protein 1-like [Aphis gossypii])	GO:0046983(molecular_function:protein dimerization activity); GO:0003677(molecular_function:DNA binding)	0	0	0	ENOG4111T8J(S:Function unknown); ENOG410XUA3(S:Function unknown)	ENOG4111T8J(Immunoglobulin V-set domain); ENOG410XUA3(ZnF_BED)	PF05699.15(Dimer_Tnp_hAT:hAT family C-terminal dimerisation region); PF02892.16(zf-BED:BED zinc finger); PF04937.16(DUF659:Protein of unknown function (DUF 659)); PF14291.7(DUF4371:Domain of unknown function (DUF4371))	sp|O96006|ZBED1_HUMAN(Zinc finger BED domain-containing protein 1 OS=Homo sapiens OX=9606 GN=ZBED1 PE=1 SV=1)	114125253
LOC114125962	microprocessor complex subunit DGCR8-like	2323	2	7	9	22	21	44	0.05	0.15	0.24	0.51	0.52	1.11	0.146667	0.713333	4.38411	2.13228	0.00125403	0.0169546	yes	up	XP_027845601.1(microprocessor complex subunit DGCR8-like [Aphis gossypii])	GO:0031053(biological_process:primary miRNA processing); GO:0070877(cellular_component:microprocessor complex); GO:0042802(molecular_function:identical protein binding); GO:0020037(molecular_function:heme binding); GO:0003723(molecular_function:RNA binding)	K18419	DCGR8	0	ENOG410XS9I(S:Function unknown)	ENOG410XS9I(DiGeorge syndrome critical region gene 8)	PF00035.27(dsrm:Double-stranded RNA binding motif)	sp|Q8WYQ5|DGCR8_HUMAN(Microprocessor complex subunit DGCR8 OS=Homo sapiens OX=9606 GN=DGCR8 PE=1 SV=1)	114125962
LOC114131663	uncharacterized LOC114131663	388	6321.32	10002.2	6484.88	3947.98	1568.81	4785.35	2949.18	3631.87	3029.29	1678.65	711.33	2260.88	3203.45	1550.29	0.415007	-1.26879	9.36e-05	0.00192947	yes	down	XP_026809935.1(uncharacterized protein LOC113551697 [Rhopalosiphum maidis])	0	0	0	0	ENOG410ZF17(S:Function unknown)	ENOG410ZF17(-)	0	0	114131663
LOC114120825	uncharacterized LOC114120825	2263	7163.18	3042.11	7025.52	1365.15	1117.48	880.75	83.7	31.38	90.09	15.07	13.03	10.51	68.39	12.87	0.174609	-2.5178	1.17e-13	1.17e-11	yes	down	XP_027838671.1(uncharacterized protein LOC114120825 [Aphis gossypii])	0	0	0	0	ENOG4111M7J(S:Function unknown)	ENOG4111M7J(Cuticular protein)	PF16619.6(SUIM_assoc:Unstructured region C-term to UIM in Ataxin3)	0	114120825
ND5	NADH dehydrogenase subunit 5	1671	412	238	461	208	162	61	14.5	7.12	16.81	6.57	5.61	2.21	12.81	4.79667	0.353815	-1.49893	0.000512077	0.00796603	yes	down	YP_009048919.1(NADH dehydrogenase subunit 5 [Aphis gossypii])	GO:0008137(molecular_function:NADH dehydrogenase (ubiquinone) activity); GO:0016021(cellular_component:integral component of membrane); GO:0070469(cellular_component:respiratory chain); GO:0042773(biological_process:ATP synthesis coupled electron transport); GO:0005743(cellular_component:mitochondrial inner membrane)	K03883	ND5	map04723(Retrograde endocannabinoid signaling); map05012(Parkinson disease); map05010(Alzheimer disease); map05016(Huntington disease); map04714(Thermogenesis); map00190(Oxidative phosphorylation)	COG1009(C:Energy production and conversion)	COG1009(subunit l)	0	sp|Q36428|NU5M_LOCMI(NADH-ubiquinone oxidoreductase chain 5 OS=Locusta migratoria OX=7004 GN=ND5 PE=3 SV=1)	19909106
LOC114120845	keratin-associated protein 6-2-like	592	2876	3524	3354	1192	1875	1106	471.2	486.12	585.1	183.06	303.4	185.41	514.14	223.957	0.390353	-1.35715	1.66e-10	1.16e-08	yes	down	XP_027838696.1(keratin-associated protein 6-2-like [Aphis gossypii])	0	0	0	0	0	0	0	0	114120845
LOC114131225	uncharacterized LOC114131225, transcript variant X1	1928	9	23	14.16	489.63	566.63	500.18	0.26	0.51	0.47	11.41	13.91	12.88	0.413333	12.7333	31.0636	4.95715	3.98e-66	1.52e-62	yes	up	KAF0713234.1(Uncharacterized protein FWK35_00023074 [Aphis craccivora])	0	0	0	0	ENOG410YUQ7(S:Function unknown); ENOG4111JB0(S:Function unknown); ENOG4111JGQ(S:Function unknown); ENOG410YNKC(S:Function unknown)	ENOG410YUQ7(-); ENOG4111JB0(-); ENOG4111JGQ(-); ENOG410YNKC(-)	0	0	114131225
LOC114128059	piggyBac transposable element-derived protein 4-like	1420	0	0	0	28	34	40	0	0	0	1.17	1.5	1.81	0	1.49333	166.932	7.38311	9.99e-09	5.23e-07	yes	up	XP_025207394.1(piggyBac transposable element-derived protein 4-like [Melanaphis sacchari])	0	0	0	0	ENOG410YA2Y(S:Function unknown); ENOG410XVJ3(S:Function unknown); ENOG410XP35(S:Function unknown); ENOG4111T8J(S:Function unknown)	ENOG410YA2Y(PiggyBac transposable element-derived protein); ENOG410XVJ3(piggyBac transposable element derived 4); ENOG410XP35(PiggyBac transposable element derived 5); ENOG4111T8J(transposon protein)	PF13843.7(DDE_Tnp_1_7:Transposase IS4)	sp|Q96DM1|PGBD4_HUMAN(PiggyBac transposable element-derived protein 4 OS=Homo sapiens OX=9606 GN=PGBD4 PE=2 SV=3)	114128059
LOC114124902	serpin B5-like	1409	166	149	150	423	414	346	7.24	5.68	7	17.42	17.83	15.56	6.64	16.9367	2.31287	1.20969	1.24e-08	6.37e-07	yes	up	XP_027844148.1(serpin B5-like [Aphis gossypii])	GO:0005615(cellular_component:extracellular space)	0	0	0	ENOG4111E6F(O:Posttranslational modification, protein turnover, chaperones); COG4826(O:Posttranslational modification, protein turnover, chaperones)	ENOG4111E6F(SERPIN); COG4826(serine-type endopeptidase inhibitor activity)	PF00079.21(Serpin:Serpin (serine protease inhibitor))	sp|Q5JJ64|Y1782_THEKO(Uncharacterized serpin-like protein TK1782 OS=Thermococcus kodakarensis (strain ATCC BAA-918 / JCM 12380 / KOD1) OX=69014 GN=TK1782 PE=3 SV=1)	114124902
LOC114119877	myrosinase 1-like	1641	5327.85	9364.29	6907.19	2847.57	2414.96	3476.8	152.1	263.05	214.29	85.43	76.12	109.65	209.813	90.4	0.372013	-1.42658	2.01e-14	2.14e-12	yes	down	XP_027837401.1(myrosinase 1-like [Aphis gossypii])	GO:0005975(biological_process:carbohydrate metabolic process); GO:0004553(molecular_function:hydrolase activity, hydrolyzing O-glycosyl compounds)	0	0	0	COG2723(G:Carbohydrate transport and metabolism)	COG2723(beta-glucosidase)	PF00232.19(Glyco_hydro_1:Glycosyl hydrolase family 1)	sp|Q95X01|MYRO1_BREBR(Myrosinase 1 OS=Brevicoryne brassicae OX=69196 PE=1 SV=1)	114119877
LOC114120137	adhesive plaque matrix protein-like, transcript variant X1	572	74086	97219	80238	29911	25929	23070	13329.6	14586.5	15262.2	5010.95	4604.64	4214.16	14392.8	4609.92	0.288811	-1.7918	3.29e-27	9.93e-25	yes	down	XP_027837752.1(adhesive plaque matrix protein-like isoform X1 [Aphis gossypii])	0	0	0	0	0	0	0	0	114120137
LOC114125004	uncharacterized LOC114125004	1185	251	90	179	57	24	11	12.22	3.82	9.49	2.67	1.16	0.55	8.51	1.46	0.160822	-2.63647	3e-06	9.65e-05	yes	down	XP_027844277.1(uncharacterized protein LOC114125004 [Aphis gossypii])	GO:0016021(cellular_component:integral component of membrane)	0	0	0	ENOG410Z8J4(S:Function unknown); ENOG4112CX6(S:Function unknown)	ENOG410Z8J4(osiris 21); ENOG4112CX6(Protein of unknown function (DUF1676))	PF07898.14(DUF1676:Protein of unknown function (DUF1676))	0	114125004
LOC114127847	clavesin-2-like	1207	69.18	40.26	36.5	6.79	6.18	0	10.3	11.48	18.25	1.85	7.18	0	13.3433	3.01	0.0809027	-3.62767	1.94e-07	7.9e-06	yes	down	XP_027847984.1(clavesin-2-like [Aphis gossypii])	GO:0005802(cellular_component:trans-Golgi network); GO:0030136(cellular_component:clathrin-coated vesicle); GO:0005768(cellular_component:endosome); GO:0080025(molecular_function:phosphatidylinositol-3,5-bisphosphate binding); GO:0007040(biological_process:lysosome organization)	0	0	0	ENOG410XRSQ(S:Function unknown)	ENOG410XRSQ(Transfer protein)	PF00650.21(CRAL_TRIO:CRAL/TRIO domain); PF13716.7(CRAL_TRIO_2:Divergent CRAL/TRIO domain)	sp|Q5SPP0|CLVS2_DANRE(Clavesin-2 OS=Danio rerio OX=7955 GN=clvs2 PE=2 SV=1)	114127847
LOC114122989	uncharacterized LOC114122989	1256	1	8	3	24	24	34	0.05	0.36	0.17	1.17	1.24	1.8	0.193333	1.40333	6.33681	2.66376	0.000160233	0.0030669	yes	up	XP_027841619.1(uncharacterized protein LOC114122989 [Aphis gossypii])	0	0	0	0	ENOG410Z6T3(S:Function unknown); ENOG4111MNY(S:Function unknown)	ENOG410Z6T3(-); ENOG4111MNY(MULE transposase domain)	0	0	114122989
LOC114132608	glucose dehydrogenase [FAD, quinone]-like	2140	1594.83	874.23	1392.79	214.42	38.39	106.35	41.7	20.2	40.12	5.47	1.03	2.91	34.0067	3.13667	0.084499	-3.56492	1.12e-06	3.9e-05	yes	down	KAE9534995.1(hypothetical protein AGLY_008287 [Aphis glycines])	GO:0050660(molecular_function:flavin adenine dinucleotide binding); GO:0016614(molecular_function:oxidoreductase activity, acting on CH-OH group of donors)	0	0	0	COG2303(E:Amino acid transport and metabolism)	COG2303(oxidoreductase)	PF00732.20(GMC_oxred_N:GMC oxidoreductase); PF05199.14(GMC_oxred_C:GMC oxidoreductase)	sp|P18172|DHGL_DROPS(Glucose dehydrogenase [FAD, quinone] OS=Drosophila pseudoobscura pseudoobscura OX=46245 GN=Gld PE=3 SV=4)	114132608
LOC114126866	RNA exonuclease 1 homolog	3288	107	125	114	52	51	72	1.78	1.84	2.08	0.82	0.85	1.23	1.9	0.966667	0.458414	-1.12528	9.89e-06	0.000278718	yes	down	XP_027846710.1(RNA exonuclease 1 homolog [Aphis gossypii])	GO:0004527(molecular_function:exonuclease activity); GO:0003676(molecular_function:nucleic acid binding)	K14570	REX1, REXO1, RNH70	map03008(Ribosome biogenesis in eukaryotes)	COG0847(S:Function unknown)	COG0847(Neuroguidin, EIF4E binding protein)	PF15870.6(EloA-BP1:ElonginA binding-protein 1)	sp|Q7TT28|REXO1_MOUSE(RNA exonuclease 1 homolog OS=Mus musculus OX=10090 GN=Rexo1 PE=1 SV=1)	114126866
LOC114122190	cuticle protein 16.5-like	758	38438	49667	44299	15475	15442	11087	4143.24	4572.06	5128.91	1562.7	1650.64	1216.43	4614.74	1476.59	0.291973	-1.77609	1.13e-21	2.41e-19	yes	down	XP_027840582.1(cuticle protein 16.5-like [Aphis gossypii])	0	0	0	0	ENOG410XZE7(S:Function unknown)	ENOG410XZE7(-)	0	0	114122190
LOC114130455	thiamine transporter 1-like	1501	40.34	103.2	37.36	32	22	16	1.67	3.73	1.73	1.34	0.91	0.76	2.37667	1.00333	0.368809	-1.43905	0.00366754	0.0399319	yes	down	XP_027851234.1(thiamine transporter 1-like [Aphis gossypii])	GO:0090482(molecular_function:vitamin transmembrane transporter activity); GO:0016021(cellular_component:integral component of membrane)	K14610	SLC19A2_3, THTR	map04977(Vitamin digestion and absorption)	ENOG410XT34(P:Inorganic ion transport and metabolism)	ENOG410XT34(reduced folate carrier activity)	PF01770.19(Folate_carrier:Reduced folate carrier)	sp|O60779|S19A2_HUMAN(Thiamine transporter 1 OS=Homo sapiens OX=9606 GN=SLC19A2 PE=1 SV=2)	114130455
LOC114128180	uncharacterized LOC114128180	1268	7	13	14	48	63	33	0.4	0.62	0.81	2.83	3.43	1.8	0.61	2.68667	3.9013	1.96396	7.9e-05	0.00166478	yes	up	XP_027841747.1(KRAB-A domain-containing protein 2-like, partial [Aphis gossypii])	0	0	0	0	COG2801(G:Carbohydrate transport and metabolism); ENOG410YZQA(S:Function unknown); ENOG410Z1NB(S:Function unknown)	COG2801(alpha amylase, catalytic); ENOG410YZQA(-); ENOG410Z1NB(-)	0	sp|Q6ZNG9|KRBA2_HUMAN(KRAB-A domain-containing protein 2 OS=Homo sapiens OX=9606 GN=KRBA2 PE=1 SV=1)	114128180
LOC114130931	cuticle protein 7-like	577	0	0	0	21.43	24.51	36.56	0	0	0	3.53	4.28	6.56	0	4.79	135.266	7.07966	8.23e-08	3.67e-06	yes	up	KAE9541033.1(hypothetical protein AGLY_004278 [Aphis glycines])	GO:0042302(molecular_function:structural constituent of cuticle)	0	0	0	ENOG410YXZN(S:Function unknown); ENOG410YXTN(S:Function unknown)	ENOG410YXZN(Cuticular protein); ENOG410YXTN(Cuticular protein)	PF00379.24(Chitin_bind_4:Insect cuticle protein)	sp|P11733|CU07_LOCMI(Cuticle protein 7 OS=Locusta migratoria OX=7004 PE=1 SV=2)	114130931
LOC114128502	phosphopantothenoylcysteine decarboxylase-like	619	0	0	0	80.19	105.89	59.51	0	0	0	11.52	16.12	9.31	0	12.3167	407.08	8.66917	3.58e-12	3.09e-10	yes	up	XP_027848822.1(phosphopantothenoylcysteine decarboxylase-like [Aphis gossypii])	GO:0003824(molecular_function:catalytic activity)	K01598	PPCDC, coaC	map00770(Pantothenate and CoA biosynthesis)	COG0452(H:Coenzyme transport and metabolism)	COG0452(Phosphopantothenoylcysteine decarboxylase)	PF02441.20(Flavoprotein:Flavoprotein)	sp|Q96CD2|COAC_HUMAN(Phosphopantothenoylcysteine decarboxylase OS=Homo sapiens OX=9606 GN=PPCDC PE=1 SV=2)	114128502
LOC114119458	gastric triacylglycerol lipase-like, transcript variant X1	1433	219	234	285	119	158	69	8.88	8.37	12.31	4.61	6.55	2.86	9.85333	4.67333	0.428676	-1.22204	0.000114093	0.00228285	yes	down	AKM28434.1(gastric triacylglycerol lipase 2, partial [Aphis gossypii])	GO:0016021(cellular_component:integral component of membrane); GO:0016788(molecular_function:hydrolase activity, acting on ester bonds); GO:0016042(biological_process:lipid catabolic process)	0	0	0	COG0596(S:Function unknown)	COG0596(Alpha beta hydrolase)	PF00561.21(Abhydrolase_1:alpha/beta hydrolase fold); PF12146.9(Hydrolase_4:Serine aminopeptidase, S33); PF04083.17(Abhydro_lipase:Partial alpha/beta-hydrolase lipase region); PF12697.8(Abhydrolase_6:Alpha/beta hydrolase family)	sp|O46107|LIP1_DROME(Lipase 1 OS=Drosophila melanogaster OX=7227 GN=Lip1 PE=2 SV=2)	114119458
LOC114123911	agrin, transcript variant X1	2703	2774.69	5469.83	2720.36	2508.39	1335.74	1157.09	57.53	99.79	61.77	49.21	27.62	24.5	73.03	33.7767	0.432291	-1.20992	0.000231713	0.00417703	yes	down	XP_027842850.1(agrin isoform X1 [Aphis gossypii])	0	0	0	0	ENOG410ZXUD(S:Function unknown); ENOG410YKSA(O:Posttranslational modification, protein turnover, chaperones)	ENOG410ZXUD(Kazal-type serine protease inhibitor domain); ENOG410YKSA(K06254 agrin)	PF07648.16(Kazal_2:Kazal-type serine protease inhibitor domain); PF00050.22(Kazal_1:Kazal-type serine protease inhibitor domain)	sp|P25304|AGRIN_RAT(Agrin OS=Rattus norvegicus OX=10116 GN=Agrn PE=1 SV=2)	114123911
LOC114120388	uncharacterized LOC114120388	345	121	203	123	28	24	28	264.55	292.51	212.9	52.39	47.33	60	256.653	53.24	0.164918	-2.60018	2.92e-17	4.09e-15	yes	down	XP_027838073.1(uncharacterized protein LOC114120388 [Aphis gossypii])	0	0	0	0	0	0	0	0	114120388
LOC114130656	uncharacterized LOC114130656	1893	5	9	7	0	0	0	0.16	0.25	0.24	0	0	0	0.216667	0	0.0241811	-5.36998	0.000883958	0.0127639	yes	down	XP_027851467.1(LOW QUALITY PROTEIN: uncharacterized protein LOC114130656 [Aphis gossypii])	0	0	0	0	ENOG410ZP20(S:Function unknown)	ENOG410ZP20(-)	PF10551.10(MULE:MULE transposase domain)	0	114130656
LOC114126231	translocon-associated protein subunit gamma-like	884	0	0.1	0	709.28	853.55	904.77	0	0.01	0	56.42	71.84	78.11	0.00333333	68.79	4046.89	11.9826	7.22e-24	1.76e-21	yes	up	XP_027845926.1(translocon-associated protein subunit gamma-like [Aphis gossypii])	GO:0016021(cellular_component:integral component of membrane); GO:0006614(biological_process:SRP-dependent cotranslational protein targeting to membrane)	K13251	SSR3	map04141(Protein processing in endoplasmic reticulum)	ENOG410XR1X(U:Intracellular trafficking, secretion, and vesicular transport)	ENOG410XR1X(signal sequence receptor, gamma (translocon-associated protein gamma))	PF07074.13(TRAP-gamma:Translocon-associated protein, gamma subunit (TRAP-gamma))	sp|Q3SZ87|SSRG_BOVIN(Translocon-associated protein subunit gamma OS=Bos taurus OX=9913 GN=SSR3 PE=2 SV=1)	114126231
LOC114125606	uncharacterized LOC114125606	1747	276	203	179	361	642	619	9.49	6.11	6.72	11.7	21.99	21.72	7.44	18.47	2.19447	1.13387	2.33e-05	0.000581577	yes	up	XP_027845131.1(uncharacterized protein LOC114125606 [Aphis gossypii])	0	0	0	0	0	0	0	0	114125606
LOC114122863	uncharacterized LOC114122863, transcript variant X1	1668	727	865	1192	538	469	423	27.09	28.04	48.21	19.03	17.38	16.17	34.4467	17.5267	0.469392	-1.09114	1.93e-06	6.44e-05	yes	down	XP_027841437.1(uncharacterized protein LOC114122863 isoform X1 [Aphis gossypii])	0	0	0	0	ENOG4111KIW(S:Function unknown)	ENOG4111KIW(-)	PF16077.6(Spaetzle:Spaetzle)	sp|B7TB45|SPZ2_DROME(Neurotrophin 1 OS=Drosophila melanogaster OX=7227 GN=NT1 PE=1 SV=1)	114122863
LOC114131706	uncharacterized LOC114131706	795	0	0	0	25	14	35	0	0	0	2.34	1.39	3.56	0	2.43	121.143	6.92056	3.62e-07	1.41e-05	yes	up	XP_027852802.1(uncharacterized protein LOC114131706 [Aphis gossypii])	GO:0015074(biological_process:DNA integration); GO:0003676(molecular_function:nucleic acid binding)	0	0	0	ENOG410YP2D(S:Function unknown); ENOG4111CQS(S:Function unknown); ENOG410Z1QR(S:Function unknown)	ENOG410YP2D(Integrase core domain protein); ENOG4111CQS(Pao retrotransposon peptidase); ENOG410Z1QR(-)	PF00665.27(rve:Integrase core domain); PF17921.2(Integrase_H2C2:Integrase zinc binding domain)	0	114131706
LOC114120824	protein transport protein sec31-like	2215	117232	156607	134132	58260.4	51158	43455.2	3048.3	3576.69	3815.4	1429.26	1326.23	1153.63	3480.13	1303.04	0.345259	-1.53425	7.6e-19	1.32e-16	yes	down	XP_027838670.1(protein transport protein sec31-like [Aphis gossypii])	0	0	0	0	ENOG4111M7J(S:Function unknown); ENOG410Y20T(S:Function unknown)	ENOG4111M7J(Cuticular protein); ENOG410Y20T(-)	0	0	114120824
LOC114126671	cuticle protein 7-like	956	168	725	128	36640	18818	117	12.69	47.27	10.46	2599.3	1412.17	9	23.4733	1340.16	54.6101	5.7711	0.00037635	0.00619951	yes	up	XP_027846471.1(cuticle protein 7-like [Aphis gossypii])	GO:0042302(molecular_function:structural constituent of cuticle)	0	0	0	ENOG410YSFI(S:Function unknown)	ENOG410YSFI(cuticle protein)	PF00379.24(Chitin_bind_4:Insect cuticle protein)	sp|P82166|CU198_LOCMI(Cuticle protein 19.8 OS=Locusta migratoria OX=7004 PE=1 SV=1)	114126671
LOC114126850	uncharacterized LOC114126850	867	4	5	0	71	56	70	0.35	0.38	0	5.81	4.85	6.22	0.243333	5.62667	20.0552	4.32591	5.91e-12	4.94e-10	yes	up	XP_027846687.1(uncharacterized protein LOC114126850, partial [Aphis gossypii])	0	0	0	0	0	0	0	0	114126850
LOC114124136	uncharacterized LOC114124136	2292	748	1071	1540	590	599	443	18.7	23.53	42.13	13.92	14.93	11.31	28.12	13.3867	0.445691	-1.16589	1.21e-05	0.000333883	yes	down	XP_027843120.1(uncharacterized protein LOC114124136 [Aphis gossypii])	0	0	0	0	0	0	0	0	114124136
LOC114125874	serine proteinase stubble-like	2033	2076	905	2072	616	689	386	62.27	23.56	67.54	17.54	20.51	11.68	51.1233	16.5767	0.299159	-1.74101	8.33e-07	2.99e-05	yes	down	XP_027845468.1(serine proteinase stubble-like [Aphis gossypii])	GO:0004252(molecular_function:serine-type endopeptidase activity)	0	0	0	COG5640(G:Carbohydrate transport and metabolism)	COG5640(phosphotransferase activity, paired acceptors)	PF00089.27(Trypsin:Trypsin); PF09342.12(DUF1986:Domain of unknown function (DUF1986)); PF13365.7(Trypsin_2:Trypsin-like peptidase domain)	sp|Q05319|STUB_DROME(Serine proteinase stubble OS=Drosophila melanogaster OX=7227 GN=Sb PE=2 SV=2)	114125874
LOC114125334	uncharacterized LOC114125334, transcript variant X1	1081	27	30	28	79	71	91	1.8	1.72	2.02	4.2	4.23	5.31	1.84667	4.58	2.57561	1.36491	1.59e-05	0.000417472	yes	up	XP_027844739.1(uncharacterized protein LOC114125334 [Aphis gossypii])	0	0	0	0	ENOG4111REY(S:Function unknown); ENOG4112AKJ(S:Function unknown); ENOG4111A20(S:Function unknown); ENOG4111NE9(S:Function unknown)	ENOG4111REY(-); ENOG4112AKJ(-); ENOG4111A20(N-acetyltransferase activity); ENOG4111NE9(-)	PF12746.8(GNAT_acetyltran:GNAT acetyltransferase)	0	114125334
LOC114130262	origin recognition complex subunit 4, transcript variant X1	1542	323	308	299	107	107	114	13.13	10.84	13.13	4.11	4.28	4.71	12.3667	4.36667	0.319234	-1.64731	2.54e-17	3.61e-15	yes	down	XP_027850997.1(origin recognition complex subunit 4 [Aphis gossypii])	GO:0016787(molecular_function:hydrolase activity); GO:0005634(cellular_component:nucleus); GO:0006260(biological_process:DNA replication); GO:0000808(cellular_component:origin recognition complex); GO:0003677(molecular_function:DNA binding)	K02606	ORC4	map04110(Cell cycle)	ENOG410XSK0(L:Replication, recombination and repair)	ENOG410XSK0(Origin recognition complex subunit)	PF14629.7(ORC4_C:Origin recognition complex (ORC) subunit 4 C-terminus); PF13191.7(AAA_16:AAA ATPase domain); PF00004.30(AAA:ATPase family associated with various cellular activities (AAA)); PF05673.14(DUF815:Protein of unknown function (DUF815)); PF01637.19(ATPase_2:ATPase domain predominantly from Archaea); PF05729.13(NACHT:NACHT domain); PF13173.7(AAA_14:AAA domain); PF00005.28(ABC_tran:ABC tr…	sp|O93479|ORC4_XENLA(Origin recognition complex subunit 4 OS=Xenopus laevis OX=8355 GN=orc4 PE=2 SV=1)	114130262
LOC114121369	neutral alpha-glucosidase AB	3579	7262	8889	8359	2550	2799	3425	110.4	119.14	139.36	36.61	42.46	53.18	122.967	44.0833	0.324524	-1.6236	5.66e-41	3.25e-38	yes	down	XP_027839470.1(neutral alpha-glucosidase AB [Aphis gossypii])	GO:0005975(biological_process:carbohydrate metabolic process); GO:0030246(molecular_function:carbohydrate binding); GO:0004553(molecular_function:hydrolase activity, hydrolyzing O-glycosyl compounds)	K05546	GANAB	map00510(N-Glycan biosynthesis); map04141(Protein processing in endoplasmic reticulum)	COG1501(G:Carbohydrate transport and metabolism)	COG1501(hydrolase, family 31)	PF01055.27(Glyco_hydro_31:Glycosyl hydrolases family 31); PF13802.7(Gal_mutarotas_2:Galactose mutarotase-like)	sp|Q8BHN3|GANAB_MOUSE(Neutral alpha-glucosidase AB OS=Mus musculus OX=10090 GN=Ganab PE=1 SV=1)	114121369
ATP6	ATP synthase F0 subunit 6	654	790	682	909	486	517	217	109.79	80.1	134.76	63.11	71.11	30.66	108.217	54.96	0.468616	-1.09352	0.000730082	0.0107866	yes	down	YP_009048916.1(ATP synthase F0 subunit 6 [Aphis gossypii])	GO:0045263(cellular_component:proton-transporting ATP synthase complex, coupling factor F(o)); GO:0005743(cellular_component:mitochondrial inner membrane); GO:0016021(cellular_component:integral component of membrane); GO:0015986(biological_process:ATP synthesis coupled proton transport); GO:0015078(molecular_function:hydrogen ion transmembrane transporter activity)	K02126	ATPeF0A, MTATP6, ATP6	map05012(Parkinson disease); map00190(Oxidative phosphorylation); map05010(Alzheimer disease); map05016(Huntington disease); map04714(Thermogenesis)	COG0356(C:Energy production and conversion)	COG0356(it plays a direct role in the translocation of protons across the membrane (By similarity))	0	sp|Q9B6H6|ATP6_RHOPD(ATP synthase subunit a OS=Rhopalosiphum padi OX=40932 GN=MT-ATP6 PE=3 SV=1)	19909103
LOC114128251	putative nuclease HARBI1	657	11	8	3	0	1	0	1.52	0.93	0.44	0	0.14	0	0.963333	0.0466667	0.0440061	-4.50615	0.00476145	0.0481393	yes	down	XP_027848531.1(putative nuclease HARBI1 [Aphis gossypii])	0	K23222	HARBI1	0	ENOG411206Y(S:Function unknown); ENOG410Z2MW(S:Function unknown); COG0507(S:Function unknown); ENOG410XZQD(S:Function unknown)	ENOG411206Y(transposon protein); ENOG410Z2MW(-); COG0507(transposon protein); ENOG410XZQD(-)	PF04827.15(Plant_tran:Plant transposon protein); PF13359.7(DDE_Tnp_4:DDE superfamily endonuclease); PF13613.7(HTH_Tnp_4:Helix-turn-helix of DDE superfamily endonuclease)	sp|Q6AZB8|HARB1_DANRE(Putative nuclease HARBI1 OS=Danio rerio OX=7955 GN=harbi1 PE=2 SV=1)	114128251
LOC114131491	uncharacterized protein C6orf136 homolog	1663	62.28	32.42	135.77	231.59	260.45	276.34	2.27	1.05	5.39	7.97	9.46	10.3	2.90333	9.24333	2.96853	1.56975	0.000265942	0.0046479	yes	up	XP_027852522.1(uncharacterized protein C6orf136 homolog [Aphis gossypii])	0	0	0	0	ENOG4111RAP(S:Function unknown)	ENOG4111RAP(chromosome 6 open reading frame 136)	PF10184.10(DUF2358:Uncharacterized conserved protein (DUF2358))	sp|Q32KT5|CF136_BOVIN(Uncharacterized protein C6orf136 homolog OS=Bos taurus OX=9913 PE=2 SV=1)	114131491
LOC114127865	uncharacterized LOC114127865	557	2514	2648	2977	1389	1927	975	477.83	418.33	596.79	245.61	361.32	188.04	497.65	264.99	0.481036	-1.05578	2.07e-05	0.000523267	yes	down	XP_027836138.1(uncharacterized protein LOC114118907 [Aphis gossypii])	0	0	0	0	0	0	0	0	114127865
LOC114127212	uncharacterized LOC114127212	1173	5560.5	7385.5	5354.32	2247.73	2370.45	2300.78	233.03	271.13	245.08	89.2	98.75	99.63	249.747	95.86	0.346211	-1.53028	7.67e-32	2.84e-29	yes	down	XP_027847193.1(uncharacterized protein LOC114127212 [Aphis gossypii])	0	0	0	0	ENOG4112BS9(S:Function unknown); ENOG410ZI5B(S:Function unknown)	ENOG4112BS9(Juvenile hormone-inducible protein); ENOG410ZI5B(Juvenile hormone-inducible protein)	PF02958.21(EcKinase:Ecdysteroid kinase); PF01636.24(APH:Phosphotransferase enzyme family); PF07914.12(DUF1679:Protein of unknown function (DUF1679))	0	114127212
LOC114132103	piggyBac transposable element-derived protein 4, transcript variant X1	1866	57	73	83	1	0	3	1.67	2.05	2.87	0.04	0	0.09	2.19667	0.0433333	0.0170238	-5.87631	4.57e-13	4.19e-11	yes	down	XP_025192822.1(piggyBac transposable element-derived protein 4-like [Melanaphis sacchari])	0	0	0	0	ENOG410XVJ3(S:Function unknown)	ENOG410XVJ3(-)	PF13843.7(DDE_Tnp_1_7:Transposase IS4); PF01609.22(DDE_Tnp_1:Transposase DDE domain); PF13842.7(Tnp_zf-ribbon_2:DDE_Tnp_1-like zinc-ribbon)	sp|Q96DM1|PGBD4_HUMAN(PiggyBac transposable element-derived protein 4 OS=Homo sapiens OX=9606 GN=PGBD4 PE=2 SV=3)	114132103
LOC114127488	uncharacterized LOC114127488, transcript variant X1	2352	286.24	333.73	273	204.15	124	91	7.53	7.74	7.92	5.02	3.23	2.46	7.73	3.57	0.435211	-1.20021	0.000136475	0.00268872	yes	down	XP_027847532.1(uncharacterized protein LOC114127488 isoform X1 [Aphis gossypii])	GO:0031151(molecular_function:histone methyltransferase activity (H3-K79 specific)); GO:0051726(biological_process:regulation of cell cycle)	0	0	0	0	0	0	0	114127488
LOC114129898	fatty acyl-CoA reductase 1-like	1252	54.14	69.45	68.05	16.24	37.04	23.47	2.82	3.15	3.86	0.8	1.92	1.25	3.27667	1.32333	0.361019	-1.46985	0.00014107	0.00276474	yes	down	XP_027850557.1(LOW QUALITY PROTEIN: fatty acyl-CoA reductase 1-like [Aphis gossypii])	GO:0102965(molecular_function:alcohol-forming fatty acyl-CoA reductase activity); GO:0016021(cellular_component:integral component of membrane); GO:0080019(molecular_function:fatty-acyl-CoA reductase (alcohol-forming) activity); GO:0006629(biological_process:lipid metabolic process)	K13356	FAR	map04146(Peroxisome); map04212(Longevity regulating pathway - worm)	ENOG410XS7R(S:Function unknown)	ENOG410XS7R(fatty-acyl-CoA reductase (alcohol-forming) activity)	PF07993.13(NAD_binding_4:Male sterility protein); PF01073.20(3Beta_HSD:3-beta hydroxysteroid dehydrogenase/isomerase family); PF01370.22(Epimerase:NAD dependent epimerase/dehydratase family); PF02719.16(Polysacc_synt_2:Polysaccharide biosynthesis protein); PF08659.11(KR:KR domain)	sp|Q5R834|FACR1_PONAB(Fatty acyl-CoA reductase 1 OS=Pongo abelii OX=9601 GN=FAR1 PE=2 SV=1)	114129898
LOC114130836	uncharacterized LOC114130836	2603	47	45	43	118	110	133	1.02	0.86	1.02	2.41	2.37	2.94	0.966667	2.57333	2.42329	1.27696	1.62e-06	5.48e-05	yes	up	XP_027851704.1(uncharacterized protein LOC114130836 [Aphis gossypii])	0	K19403	MCPH1	0	ENOG411033E(S:Function unknown); ENOG41120NI(S:Function unknown); ENOG41100RB(S:Function unknown); COG5594(S:Function unknown)	ENOG411033E(BRCT); ENOG41120NI(microcephalin 1); ENOG41100RB(-); COG5594(transmembrane protein 63C)	PF12738.8(PTCB-BRCT:twin BRCT domain); PF16589.6(BRCT_2:BRCT domain, a BRCA1 C-terminus domain); PF00533.27(BRCT:BRCA1 C Terminus (BRCT) domain)	sp|Q8NEM0|MCPH1_HUMAN(Microcephalin OS=Homo sapiens OX=9606 GN=MCPH1 PE=1 SV=4)	114130836
LOC114131705	uncharacterized LOC114131705	2379	0	5	3	76	72	146	0	0.11	0.08	1.72	1.72	3.57	0.0633333	2.33667	33.4568	5.06423	1.25e-14	1.39e-12	yes	up	XP_027852801.1(uncharacterized protein LOC114131705 [Aphis gossypii])	0	0	0	0	ENOG410YP2D(S:Function unknown); ENOG4111CQS(S:Function unknown); COG2801(L:Replication, recombination and repair); ENOG410Y7Q4(S:Function unknown)	ENOG410YP2D(Integrase core domain protein); ENOG4111CQS(Pao retrotransposon peptidase); COG2801(Retrotransposon protein); ENOG410Y7Q4(-)	PF05380.14(Peptidase_A17:Pao retrotransposon peptidase)	0	114131705
LOC114122597	uncharacterized LOC114122597	1138	0	5	1	69	36	20	0	0.26	0.06	3.84	2.12	1.21	0.106667	2.39	20.075	4.32733	1.56e-06	5.28e-05	yes	up	XP_027841094.1(uncharacterized protein LOC114122597, partial [Aphis gossypii])	0	0	0	0	ENOG410YMB3(S:Function unknown); ENOG41120A8(S:Function unknown); ENOG410ZKAB(S:Function unknown); ENOG410YQSC(S:Function unknown); ENOG4111RKA(S:Function unknown); ENOG41112V0(S:Function unknown); ENOG410YRUW(S:Function unknown)	ENOG410YMB3(-); ENOG41120A8(-); ENOG410ZKAB(-); ENOG410YQSC(reverse transcriptase); ENOG4111RKA(Reverse transcriptase); ENOG41112V0(Pfam:RnaseH); ENOG410YRUW(reverse transcriptase)	PF14529.7(Exo_endo_phos_2:Endonuclease-reverse transcriptase); PF03372.24(Exo_endo_phos:Endonuclease/Exonuclease/phosphatase family)	0	114122597
LOC114121246	uncharacterized LOC114121246	2462	14	21	8	0	0	0	0.32	0.43	0.2	0	0	0	0.316667	0	0.0118246	-6.40206	8.36e-06	0.000238543	yes	down	XP_027839289.1(uncharacterized protein LOC114121246 [Aphis gossypii])	GO:0003676(molecular_function:nucleic acid binding)	0	0	0	ENOG4111YDA(S:Function unknown); ENOG4110DDB(S:Function unknown)	ENOG4111YDA(Pfam:DDE); ENOG4110DDB(Conserved hypothetical, protein)	PF03184.20(DDE_1:DDE superfamily endonuclease); PF05225.17(HTH_psq:helix-turn-helix, Psq domain); PF03221.17(HTH_Tnp_Tc5:Tc5 transposase DNA-binding domain)	0	114121246
LOC114132887	coatomer subunit beta'-like	2727	36.02	62.23	105.53	158.76	151.31	142.73	42.12	11.67	31.36	3.08	3.19	2.99	28.3833	3.08667	2.03212	1.02298	0.00473603	0.0479246	yes	up	XP_027854279.1(coatomer subunit beta' [Aphis gossypii])	GO:0016192(biological_process:vesicle-mediated transport); GO:0030663(cellular_component:COPI-coated vesicle membrane); GO:0006886(biological_process:intracellular protein transport); GO:0000139(cellular_component:Golgi membrane); GO:0030117(cellular_component:membrane coat); GO:0005198(molecular_function:structural molecule activity)	K17302	COPB2, SEC27	0	ENOG410XNNY(S:Function unknown)	ENOG410XNNY(coatomer protein complex, subunit beta 2 (beta prime))	PF04053.15(Coatomer_WDAD:Coatomer WD associated region); PF00400.33(WD40:WD domain, G-beta repeat)	sp|O35142|COPB2_RAT(Coatomer subunit beta' OS=Rattus norvegicus OX=10116 GN=Copb2 PE=1 SV=3)	114132887
LOC114130087	uncharacterized LOC114130087	1548	3	6	2	15	33	18	0.12	0.19	0.09	0.52	1.2	0.67	0.133333	0.796667	5.5111	2.46234	0.00103353	0.0144859	yes	up	XP_027850780.1(uncharacterized protein LOC114130087 [Aphis gossypii])	GO:0016021(cellular_component:integral component of membrane); GO:0022857(molecular_function:transmembrane transporter activity)	K10408;K15381	DNAH;DIRC2, SLC49A3	map05016(Huntington disease)	ENOG410XSTK(U:Intracellular trafficking, secretion, and vesicular transport); ENOG410ZP92(S:Function unknown)	ENOG410XSTK(Feline leukemia virus subgroup C cellular receptor); ENOG410ZP92(-)	PF07690.17(MFS_1:Major Facilitator Superfamily)	0	114130087
LOC114129502	H/ACA ribonucleoprotein complex subunit 3	478	741	1016.99	704	380	422.99	438.96	200.27	223.17	197.04	94.89	112.11	120.04	206.827	109.013	0.461217	-1.11648	2.92e-13	2.72e-11	yes	down	XP_027850057.1(H/ACA ribonucleoprotein complex subunit 3 [Aphis gossypii])	GO:0030515(molecular_function:snoRNA binding); GO:0001522(biological_process:pseudouridine synthesis); GO:0042254(biological_process:ribosome biogenesis)	K11130	NOP10, NOLA3	map03008(Ribosome biogenesis in eukaryotes)	COG2260(J:Translation, ribosomal structure and biogenesis); ENOG410XP4Z(J:Translation, ribosomal structure and biogenesis)	COG2260(rRNA processing); ENOG410XP4Z(rRNA processing)	PF04135.13(Nop10p:Nucleolar RNA-binding protein, Nop10p family)	sp|Q6DRH5|NOP10_DANRE(H/ACA ribonucleoprotein complex subunit 3 OS=Danio rerio OX=7955 GN=nop10 PE=3 SV=1)	114129502
LOC114122234	cathepsin B-like cysteine proteinase 3	1373	1591	1839	1267	595	521	1249	71.98	73.69	63.19	25.67	23.89	58.75	69.62	36.1033	0.451776	-1.14632	4.71e-05	0.00107481	yes	down	XP_027840634.1(cathepsin B-like cysteine proteinase 3 [Aphis gossypii])	GO:0008234(molecular_function:cysteine-type peptidase activity)	clec;K01363	;CTSB	map04142(Lysosome); map04621(NOD-like receptor signaling pathway); map04924(Renin secretion); map04210(Apoptosis); map04612(Antigen processing and presentation); map04140(Autophagy - animal)	COG4870(F:Nucleotide transport and metabolism)	COG4870(Dihydroorotase)	PF00112.24(Peptidase_C1:Papain family cysteine protease)	sp|P43508|CPR4_CAEEL(Cathepsin B-like cysteine proteinase 4 OS=Caenorhabditis elegans OX=6239 GN=cpr-4 PE=1 SV=1)	114122234
LOC114127047	uncharacterized LOC114127047	389	3	9	15	0	0	0	1.46	3.39	7.22	0	0	0	4.02333	0	0.018768	-5.73558	0.000384356	0.00630421	yes	down	KAF0702675.1(Alkaline nuclease [Aphis craccivora])	0	0	0	0	ENOG4111H1J(S:Function unknown); ENOG410ZNGY(S:Function unknown)	ENOG4111H1J(-); ENOG410ZNGY(-)	0	0	114127047
LOC114131928	uncharacterized LOC114131928	3298	63	77	68	24	21	21	2.36	3.55	2.34	0.87	0.89	0.73	2.75	0.83	0.289739	-1.78717	1.45e-07	6.13e-06	yes	down	XP_027853072.1(uncharacterized protein LOC114131928 [Aphis gossypii])	GO:0004222(molecular_function:metalloendopeptidase activity); GO:0004601(molecular_function:peroxidase activity); GO:0020037(molecular_function:heme binding); GO:0006979(biological_process:response to oxidative stress)	0	0	0	ENOG410XS6N(S:Function unknown); ENOG410XPKZ(S:Function unknown)	ENOG410XS6N(Reprolysin (M12B) family zinc metalloprotease); ENOG410XPKZ(Reprolysin (M12B) family zinc metalloprotease)	PF01421.20(Reprolysin:Reprolysin (M12B) family zinc metalloprotease); PF13574.7(Reprolysin_2:Metallo-peptidase family M12B Reprolysin-like); PF13582.7(Reprolysin_3:Metallo-peptidase family M12B Reprolysin-like); PF13688.7(Reprolysin_5:Metallo-peptidase family M12); PF13583.7(Reprolysin_4:Metallo-peptidase family M12B Reprolysin-like)	sp|Q19204|ADT2_CAEEL(A disintegrin and metalloproteinase with thrombospondin motifs adt-2 OS=Caenorhabditis elegans OX=6239 GN=adt-2 PE=1 SV=5)	114131928
LOC114131222	putative nuclease HARBI1	2324	0	0	3.84	831.37	1065.37	924.82	0	0	0.04	15.78	21.91	19.01	0.0133333	18.9	641.229	9.3247	3.86e-36	1.77e-33	yes	up	KAF0714699.1(putative nuclease HARBI1 [Aphis craccivora])	0	K23222	HARBI1	0	ENOG411206Y(S:Function unknown); ENOG410XZQD(S:Function unknown)	ENOG411206Y(transposon protein); ENOG410XZQD(-)	PF13359.7(DDE_Tnp_4:DDE superfamily endonuclease); PF04827.15(Plant_tran:Plant transposon protein); PF01609.22(DDE_Tnp_1:Transposase DDE domain)	sp|Q96MB7|HARB1_HUMAN(Putative nuclease HARBI1 OS=Homo sapiens OX=9606 GN=HARBI1 PE=1 SV=1)	114131222
LOC114130156	uncharacterized LOC114130156	1902	10295.9	12499.2	12827.1	8017.03	6298.66	4934.56	319.86	340.46	435.43	234.88	195.02	156.48	365.25	195.46	0.498108	-1.00547	4.04e-06	0.000125859	yes	down	XP_027850864.1(uncharacterized protein LOC114130156 [Aphis gossypii])	GO:0016021(cellular_component:integral component of membrane)	0	0	0	ENOG410XXKI(S:Function unknown)	ENOG410XXKI(-)	0	0	114130156
LOC114119879	myrosinase 1-like	1955	11240.9	22900.8	16536.1	8603.05	7371.53	10780	334.9	601.53	539.31	241.91	219.42	329.34	491.913	263.557	0.48696	-1.03813	9.94e-07	3.52e-05	yes	down	XP_027837404.1(myrosinase 1-like [Aphis gossypii])	GO:0005975(biological_process:carbohydrate metabolic process); GO:0004553(molecular_function:hydrolase activity, hydrolyzing O-glycosyl compounds)	0	0	0	COG2723(G:Carbohydrate transport and metabolism)	COG2723(beta-glucosidase)	PF00232.19(Glyco_hydro_1:Glycosyl hydrolase family 1)	sp|Q95X01|MYRO1_BREBR(Myrosinase 1 OS=Brevicoryne brassicae OX=69196 PE=1 SV=1)	114119879
LOC114126759	vegetative incompatibility protein HET-E-1-like	2332	95.65	124.61	159.48	295.58	333.76	232.23	2.34	2.68	4.28	6.84	8.16	5.81	3.1	6.93667	2.07605	1.05384	5.4e-05	0.0012141	yes	up	XP_027846566.1(vegetative incompatibility protein HET-E-1-like [Aphis gossypii])	0	0	0	0	ENOG410ZRC5(S:Function unknown)	ENOG410ZRC5(WD40)	PF00400.33(WD40:WD domain, G-beta repeat)	0	114126759
LOC114128868	pathogenesis-related protein 5-like	1203	3	2	2	18	15	28	0.16	0.1	0.12	0.93	0.82	1.57	0.126667	1.10667	7.83089	2.96918	0.00024255	0.00435869	yes	up	XP_027849270.1(LOW QUALITY PROTEIN: pathogenesis-related protein 5-like [Aphis gossypii])	0	0	0	0	ENOG4111KEV(S:Function unknown); ENOG4111GDH(S:Function unknown)	ENOG4111KEV(thaumatin-like protein); ENOG4111GDH(thaumatin-like protein)	PF00314.18(Thaumatin:Thaumatin family)	sp|P28493|PR5_ARATH(Pathogenesis-related protein 5 OS=Arabidopsis thaliana OX=3702 GN=At1g75040 PE=1 SV=1)	114128868
LOC114121380	UDP-glucuronosyltransferase-like	1824	402	477	374	200	206	279	13.13	13.65	13.34	6.16	6.7	9.3	13.3733	7.38667	0.495735	-1.01236	9.93e-09	5.22e-07	yes	down	XP_027839491.1(UDP-glucuronosyltransferase-like [Aphis gossypii])	GO:0015020(molecular_function:glucuronosyltransferase activity); GO:0016021(cellular_component:integral component of membrane)	K00699	UGT	map05204(Chemical carcinogenesis); map00983(Drug metabolism - other enzymes); map00982(Drug metabolism - cytochrome P450); map00980(Metabolism of xenobiotics by cytochrome P450); map00040(Pentose and glucuronate interconversions); map00860(Porphyrin and chlorophyll metabolism); map00053(Ascorbate and aldarate metabolism); map00830(Retinol metabolism); map00140(Steroid hormone biosynthesis)	COG1819(S:Function unknown)	COG1819(Transferase)	PF00201.19(UDPGT:UDP-glucoronosyl and UDP-glucosyl transferase); PF04101.17(Glyco_tran_28_C:Glycosyltransferase family 28 C-terminal domain)	sp|Q9Y4X1|UD2A1_HUMAN(UDP-glucuronosyltransferase 2A1 OS=Homo sapiens OX=9606 GN=UGT2A1 PE=1 SV=2)	114121380
LOC114131092	soluble calcium-activated nucleotidase 1-like	1262	27.29	16.69	31.3	3.32	2.77	9.13	2.12	1.14	2.68	0.25	0.22	0.74	1.98	0.403333	0.176713	-2.50052	0.00027041	0.00470448	yes	down	XP_027852035.1(soluble calcium-activated nucleotidase 1-like [Aphis gossypii])	GO:0017110(molecular_function:nucleoside-diphosphatase activity); GO:0005509(molecular_function:calcium ion binding)	K12304	CANT1	map00240(Pyrimidine metabolism); map00230(Purine metabolism)	ENOG410XS4T(F:Nucleotide transport and metabolism)	ENOG410XS4T(nucleoside-diphosphatase activity)	PF06079.12(Apyrase:Apyrase)	sp|Q8WVQ1|CANT1_HUMAN(Soluble calcium-activated nucleotidase 1 OS=Homo sapiens OX=9606 GN=CANT1 PE=1 SV=1)	114131092
LOC114127858	uncharacterized LOC114127858, transcript variant X1	1404	29	23	28	5	10	7	1.35	0.92	1.4	0.23	0.49	0.32	1.22333	0.346667	0.246968	-2.0176	0.000393503	0.00642666	yes	down	XP_027847997.1(uncharacterized protein LOC114127858 [Aphis gossypii])	GO:0005802(cellular_component:trans-Golgi network); GO:0030136(cellular_component:clathrin-coated vesicle); GO:0005768(cellular_component:endosome); GO:0080025(molecular_function:phosphatidylinositol-3,5-bisphosphate binding); GO:0007040(biological_process:lysosome organization)	0	0	0	ENOG410XRSQ(S:Function unknown)	ENOG410XRSQ(IGc2)	0	0	114127858
LOC114123707	uncharacterized LOC114123707, transcript variant X1	1287	3	0	2	22	32	18	0.15	0	0.11	1.09	1.64	0.96	0.0866667	1.23	12.9055	3.68991	4.02e-05	0.000940635	yes	up	XP_027842575.1(uncharacterized protein LOC114123707 isoform X1 [Aphis gossypii])	GO:0016021(cellular_component:integral component of membrane); GO:0050909(biological_process:sensory perception of taste); GO:0007165(biological_process:signal transduction); GO:0005886(cellular_component:plasma membrane)	0	0	0	0	0	PF08395.13(7tm_7:7tm Chemosensory receptor)	0	114123707
LOC114132409	piggyBac transposable element-derived protein 4-like	772	7	17	13	0	0	0	0.73	1.52	1.46	0	0	0	1.23667	0	0.013809	-6.17825	2.38e-05	0.000591819	yes	down	XP_027853664.1(piggyBac transposable element-derived protein 4-like [Aphis gossypii])	0	0	0	0	ENOG410YA2Y(S:Function unknown); ENOG410XVJ3(S:Function unknown); ENOG410XP35(S:Function unknown)	ENOG410YA2Y(PiggyBac transposable element-derived protein); ENOG410XVJ3(piggyBac transposable element derived 4); ENOG410XP35(PiggyBac transposable element derived 5)	PF13843.7(DDE_Tnp_1_7:Transposase IS4)	sp|Q96DM1|PGBD4_HUMAN(PiggyBac transposable element-derived protein 4 OS=Homo sapiens OX=9606 GN=PGBD4 PE=2 SV=3)	114132409
LOC114119773	phosphatidylinositol phosphatase PTPRQ, transcript variant X1	4507	22	17	23	53	50	111	0.3	0.2	0.34	0.66	0.68	1.54	0.28	0.96	3.06963	1.61806	0.000202578	0.00372802	yes	up	XP_027837262.1(phosphatidylinositol phosphatase PTPRQ [Aphis gossypii])	GO:0004725(molecular_function:protein tyrosine phosphatase activity); GO:0016021(cellular_component:integral component of membrane)	K01104	E3.1.3.48	0	COG5599(S:Function unknown)	COG5599(kelch-like)	PF00102.28(Y_phosphatase:Protein-tyrosine phosphatase); PF00041.22(fn3:Fibronectin type III domain); PF18861.2(PTP_tm:Transmembrane domain of protein tyrosine phosphatase, receptor type J); PF00782.21(DSPc:Dual specificity phosphatase, catalytic domain)	sp|Q9UMZ3|PTPRQ_HUMAN(Phosphatidylinositol phosphatase PTPRQ OS=Homo sapiens OX=9606 GN=PTPRQ PE=1 SV=2)	114119773
LOC114123102	cytochrome P450 4C1-like	2344	62	128	146	52	42	34	1.49	2.71	3.8	1.18	1.01	0.83	2.66667	1.00667	0.353112	-1.5018	6.22e-05	0.00136709	yes	down	XP_027841767.1(cytochrome P450 4C1-like [Aphis gossypii])	GO:0005506(molecular_function:iron ion binding); GO:0016705(molecular_function:oxidoreductase activity, acting on paired donors, with incorporation or reduction of molecular oxygen); GO:0004497(molecular_function:monooxygenase activity); GO:0020037(molecular_function:heme binding)	K07427	CYP4V2	0	COG2124(O:Posttranslational modification, protein turnover, chaperones)	COG2124(bone morphogenetic protein)	PF00067.23(p450:Cytochrome P450)	sp|P29981|CP4C1_BLADI(Cytochrome P450 4C1 OS=Blaberus discoidalis OX=6981 GN=CYP4C1 PE=2 SV=1)	114123102
LOC114128190	maltase 2-like, transcript variant X1	2063	1849.82	1410.64	1082.18	5672.21	8730	4631.79	51.12	33.72	31.78	148.59	241.2	129.88	38.8733	173.223	3.95643	1.9842	1.82e-12	1.62e-10	yes	up	XP_027848442.1(maltase 2-like [Aphis gossypii])	GO:0003824(molecular_function:catalytic activity); GO:0005975(biological_process:carbohydrate metabolic process)	K01187	malZ	map00500(Starch and sucrose metabolism); map00052(Galactose metabolism)	COG0366(G:Carbohydrate transport and metabolism)	COG0366(alpha amylase, catalytic)	PF00128.25(Alpha-amylase:Alpha amylase, catalytic domain)	sp|O16099|MAL2_DROVI(Maltase 2 OS=Drosophila virilis OX=7244 GN=Mal-B2 PE=3 SV=2)	114128190
LOC114125451	esterase E4-like	2203	222	222	196	577	572	453	5.81	5.1	5.61	14.24	14.92	12.1	5.50667	13.7533	2.28414	1.19165	4.56e-09	2.54e-07	yes	up	XP_027844908.1(esterase E4-like [Aphis gossypii])	GO:0016787(molecular_function:hydrolase activity)	0	0	0	COG2272(I:Lipid transport and metabolism)	COG2272(Carboxylesterase)	PF00135.29(COesterase:Carboxylesterase family); PF07859.14(Abhydrolase_3:alpha/beta hydrolase fold)	sp|P35502|ESTF_MYZPE(Esterase FE4 OS=Myzus persicae OX=13164 PE=1 SV=1)	114125451
LOC114131167	uncharacterized LOC114131167	1842	1	0	0	22	14	35	0.03	0	0	0.67	0.45	1.15	0.01	0.756667	59.5003	5.89483	1.33e-05	0.000357452	yes	up	XP_027852128.1(uncharacterized protein LOC114131167 [Aphis gossypii])	0	0	0	0	ENOG4112AZ8(S:Function unknown); ENOG4111PX2(S:Function unknown); COG2801(L:Replication, recombination and repair)	ENOG4112AZ8(-); ENOG4111PX2(-); COG2801(Retrotransposon protein)	PF05585.13(DUF1758:Putative peptidase (DUF1758)); PF13650.7(Asp_protease_2:Aspartyl protease)	0	114131167
LOC114126113	DNA-directed RNA polymerase II subunit RPB1-like	1496	31384	32346	29574	13778	11858	8492	1289.92	1163.01	1325.62	538.46	489.74	359.35	1259.52	462.517	0.3357	-1.57476	3.31e-13	3.06e-11	yes	down	XP_027845792.1(DNA-directed RNA polymerase II subunit RPB1-like [Aphis gossypii])	0	K03006	RPB1, POLR2A	map03020(RNA polymerase); map05016(Huntington disease)	ENOG410YXZN(S:Function unknown); ENOG410YXTN(S:Function unknown); ENOG410ZCN2(S:Function unknown)	ENOG410YXZN(Cuticular protein); ENOG410YXTN(Cuticular protein); ENOG410ZCN2(Insect cuticle protein)	PF00379.24(Chitin_bind_4:Insect cuticle protein)	sp|P45583|CU19_LOCMI(Cuticle protein 19 OS=Locusta migratoria OX=7004 PE=1 SV=1)	114126113
LOC114126604	beta-galactosidase-like	2088	53.22	83.98	49.37	0	0	0	1.48	2.05	1.5	0	0	0	1.67667	0	0.00272993	-8.51692	8.3e-12	6.8e-10	yes	down	XP_027846387.1(beta-galactosidase-like [Aphis gossypii])	GO:0005975(biological_process:carbohydrate metabolic process); GO:0004565(molecular_function:beta-galactosidase activity)	K12309	GLB1, ELNR1	map00600(Sphingolipid metabolism); map00604(Glycosphingolipid biosynthesis - ganglio series); map00052(Galactose metabolism); map00511(Other glycan degradation); map00531(Glycosaminoglycan degradation); map04142(Lysosome)	COG1874(G:Carbohydrate transport and metabolism)	COG1874(beta-galactosidase)	PF01301.20(Glyco_hydro_35:Glycosyl hydrolases family 35); PF02449.16(Glyco_hydro_42:Beta-galactosidase); PF13364.7(BetaGal_dom4_5:Beta-galactosidase jelly roll domain)	sp|Q9TRY9|BGAL_CANLF(Beta-galactosidase OS=Canis lupus familiaris OX=9615 GN=GLB1 PE=1 SV=3)	114126604
LOC114129516	uncharacterized LOC114129516	2045	25	35	6	599	470	40	0.8	0.98	0.21	17.87	14.83	1.29	0.663333	11.33	16.0604	4.00543	0.000476252	0.00753134	yes	up	XP_027850079.1(uncharacterized protein LOC114129516 [Aphis gossypii])	0	0	0	0	COG0666(P:Inorganic ion transport and metabolism)	COG0666(sulfate transporter)	PF00379.24(Chitin_bind_4:Insect cuticle protein)	sp|P82119|CUO6_BLACR(Cuticle protein 6 OS=Blaberus craniifer OX=6982 PE=1 SV=1)	114129516
LOC114129314	DNA-binding protein RFX2-like, transcript variant X1	3721	23	28	31	332	333	360	0.38	0.39	0.5	5.4	5.64	6.1	0.423333	5.71333	11.3773	3.50809	1.51e-47	1.33e-44	yes	up	XP_027849812.1(DNA-binding protein RFX2-like isoform X1 [Aphis gossypii])	0	K09173	RFX1_2_3	0	ENOG410XSHE(K:Transcription)	ENOG410XSHE(influences HLA class II expression)	PF02257.16(RFX_DNA_binding:RFX DNA-binding domain); PF13465.7(zf-H2C2_2:Zinc-finger double domain); PF00096.27(zf-C2H2:Zinc finger, C2H2 type); PF13894.7(zf-C2H2_4:C2H2-type zinc finger); PF12171.9(zf-C2H2_jaz:Zinc-finger double-stranded RNA-binding)	sp|B2GV50|RFX2_RAT(DNA-binding protein RFX2 OS=Rattus norvegicus OX=10116 GN=Rfx2 PE=1 SV=1)	114129314
LOC114119090	uncharacterized LOC114119090	1458	0	0	0	77	41	93	0	0	0	4.42	1.75	5.66	0	3.94333	346.65	8.43734	2.66e-11	2e-09	yes	up	XP_027836357.1(uncharacterized protein LOC114119090 [Aphis gossypii])	0	0	0	0	ENOG410Z8WK(S:Function unknown); COG2801(S:Function unknown); ENOG4111Z1R(S:Function unknown)	ENOG410Z8WK(-); COG2801(-); ENOG4111Z1R(-)	0	0	114119090
LOC114127678	uncharacterized LOC114127678	4074	6044.67	9458.35	7176.27	2324.61	2334.09	2312.34	89.26	123.64	122.41	33.87	34.71	33.43	111.77	34.0033	0.282847	-1.82191	1.82e-36	9.09e-34	yes	down	XP_027847795.1(uncharacterized protein LOC114127678 [Aphis gossypii])	0	K00699	UGT	map05204(Chemical carcinogenesis); map00983(Drug metabolism - other enzymes); map00982(Drug metabolism - cytochrome P450); map00980(Metabolism of xenobiotics by cytochrome P450); map00040(Pentose and glucuronate interconversions); map00860(Porphyrin and chlorophyll metabolism); map00053(Ascorbate and aldarate metabolism); map00830(Retinol metabolism); map00140(Steroid hormone biosynthesis)	COG1819(S:Function unknown)	COG1819(Transferase)	PF00201.19(UDPGT:UDP-glucoronosyl and UDP-glucosyl transferase); PF04101.17(Glyco_tran_28_C:Glycosyltransferase family 28 C-terminal domain); PF13439.7(Glyco_transf_4:Glycosyltransferase Family 4)	sp|P08541|UD2B2_RAT(UDP-glucuronosyltransferase 2B2 OS=Rattus norvegicus OX=10116 GN=Ugt2b PE=1 SV=1)	114127678
LOC114127834	clavesin-2-like	1207	7.13	6.75	11.11	0	0	0	0.39	0.32	0.66	0	0	0	0.456667	0	0.0199617	-5.64662	0.000284533	0.00490552	yes	down	XP_027847967.1(clavesin-2-like [Aphis gossypii])	GO:0005802(cellular_component:trans-Golgi network); GO:0030136(cellular_component:clathrin-coated vesicle); GO:0005768(cellular_component:endosome); GO:0080025(molecular_function:phosphatidylinositol-3,5-bisphosphate binding); GO:0007040(biological_process:lysosome organization)	0	0	0	ENOG410XRSQ(S:Function unknown)	ENOG410XRSQ(Transfer protein)	PF00650.21(CRAL_TRIO:CRAL/TRIO domain); PF13716.7(CRAL_TRIO_2:Divergent CRAL/TRIO domain)	sp|Q5SPP0|CLVS2_DANRE(Clavesin-2 OS=Danio rerio OX=7955 GN=clvs2 PE=2 SV=1)	114127834
LOC114126500	eukaryotic initiation factor 4A-like	1336	13	21	5	1	1	4	0.62	0.88	0.26	0.05	0.05	0.2	0.586667	0.1	0.140227	-2.83416	0.00498156	0.0497505	yes	down	XP_027846254.1(eukaryotic initiation factor 4A-like [Aphis gossypii])	GO:0010494(cellular_component:cytoplasmic stress granule); GO:0004386(molecular_function:helicase activity); GO:0003724(molecular_function:RNA helicase activity); GO:0003723(molecular_function:RNA binding); GO:0003676(molecular_function:nucleic acid binding); GO:0002183(biological_process:cytoplasmic translational initiation); GO:0005524(molecular_function:ATP binding); GO:0003743(molecular_funct…	K03257	EIF4A	map03013(RNA transport)	COG0513(L:Replication, recombination and repair)	COG0513(purine NTP-dependent helicase activity)	PF00270.30(DEAD:DEAD/DEAH box helicase); PF00271.32(Helicase_C:Helicase conserved C-terminal domain); PF04851.16(ResIII:Type III restriction enzyme, res subunit)	sp|Q02748|IF4A_DROME(Eukaryotic initiation factor 4A OS=Drosophila melanogaster OX=7227 GN=eIF4A PE=1 SV=3)	114126500
LOC114121297	intraflagellar transport protein 172 homolog, transcript variant X1	5793	22	42	29	64	63	81	0.2	0.37	0.31	0.6	0.65	0.86	0.293333	0.703333	2.05036	1.03588	0.00224122	0.0270084	yes	up	XP_027839360.1(intraflagellar transport protein 172 homolog isoform X1 [Aphis gossypii])	0	K19676	IFT172	0	ENOG410XR2C(S:Function unknown)	ENOG410XR2C(intraflagellar transport 172 homolog (Chlamydomonas))	PF00637.21(Clathrin:Region in Clathrin and VPS); PF12894.8(ANAPC4_WD40:Anaphase-promoting complex subunit 4 WD40 domain)	sp|Q6VH22|IF172_MOUSE(Intraflagellar transport protein 172 homolog OS=Mus musculus OX=10090 GN=Ift172 PE=1 SV=1)	114121297
LOC114122663	trans-1,2-dihydrobenzene-1,2-diol dehydrogenase-like	1468	0	0	0	797.61	715.63	1146.84	0	0	0	31.98	30.33	49.8	0	37.37	4351.94	12.0874	5.97e-24	1.52e-21	yes	up	XP_027841195.1(trans-1,2-dihydrobenzene-1,2-diol dehydrogenase-like [Aphis gossypii])	GO:0016491(molecular_function:oxidoreductase activity)	K00078	DHDH	map00040(Pentose and glucuronate interconversions); map00980(Metabolism of xenobiotics by cytochrome P450)	COG0673(S:Function unknown)	COG0673(oxidoreductase)	PF01408.23(GFO_IDH_MocA:Oxidoreductase family, NAD-binding Rossmann fold); PF02894.18(GFO_IDH_MocA_C:Oxidoreductase family, C-terminal alpha/beta domain)	sp|Q6DKE0|DHDH_XENLA(Trans-1,2-dihydrobenzene-1,2-diol dehydrogenase OS=Xenopus laevis OX=8355 GN=dhdh PE=2 SV=1)	114122663
LOC114132928	probable cytochrome P450 6a13, transcript variant X1	1954	6699	10734	5589	519	518	851	202.32	284.91	184.04	14.67	15.54	26.3	223.757	18.8367	0.0749468	-3.73799	3.46e-57	6.61e-54	yes	down	XP_027854335.1(probable cytochrome P450 6a13 isoform X1 [Aphis gossypii])	GO:0005506(molecular_function:iron ion binding); GO:0016705(molecular_function:oxidoreductase activity, acting on paired donors, with incorporation or reduction of molecular oxygen); GO:0004497(molecular_function:monooxygenase activity); GO:0020037(molecular_function:heme binding)	K14999	CYP6	0	COG2124(Q:Secondary metabolites biosynthesis, transport and catabolism)	COG2124(Cytochrome p450)	PF00067.23(p450:Cytochrome P450)	sp|Q9V4U9|C6A13_DROME(Probable cytochrome P450 6a13 OS=Drosophila melanogaster OX=7227 GN=Cyp6a13 PE=2 SV=1)	114132928
LOC114124826	uncharacterized LOC114124826	1054	56.44	54.03	45.64	128.08	189.9	111.5	3.71	3.08	3.25	7.92	12.42	7.48	3.34667	9.27333	2.50584	1.3253	1.7e-05	0.000442273	yes	up	KAE9544547.1(hypothetical protein AGLY_000088 [Aphis glycines])	0	K06104	AMOTL	map04530(Tight junction)	ENOG410XSY2(Z:Cytoskeleton)	ENOG410XSY2(angiomotin)	0	0	114124826
LOC114121933	uncharacterized LOC114121933	627	0	0	0	7	11	10	0	0	0	1.35	1.99	2.1	0	1.81333	45.8261	5.5181	0.000338939	0.00569786	yes	up	XP_027840246.1(uncharacterized protein LOC114121933 [Aphis gossypii])	0	0	0	0	ENOG410XRA9(S:Function unknown); ENOG410XQCA(S:Function unknown)	ENOG410XRA9(to transposase domain-containing protein); ENOG410XQCA(to transposase domaincontaining protein)	0	0	114121933
LOC114119261	acetyl-coenzyme A transporter 1-like	567	92	72	126	25	21	45	3.89	3.41	5.29	1.67	0.78	1.71	4.19667	1.38667	0.279438	-1.8394	3.11e-06	9.92e-05	yes	down	KAE9538662.1(hypothetical protein AGLY_005761 [Aphis glycines])	GO:0008521(molecular_function:acetyl-CoA transporter activity); GO:0016021(cellular_component:integral component of membrane)	K03372	ACATN, SLC33A1	map00604(Glycosphingolipid biosynthesis - ganglio series)	COG0477(G:Carbohydrate transport and metabolism)	COG0477(major facilitator Superfamily)	PF13000.8(Acatn:Acetyl-coenzyme A transporter 1)	sp|Q99J27|ACATN_MOUSE(Acetyl-coenzyme A transporter 1 OS=Mus musculus OX=10090 GN=Slc33a1 PE=1 SV=1)	114119261
LOC114125161	protein ALP1-like	907	0	0	3	12	12	16	0	0	0.26	0.92	0.97	1.33	0.0866667	1.07333	11.9926	3.58407	0.00240004	0.0284555	yes	up	XP_027844488.1(protein ALP1-like, partial [Aphis gossypii])	0	0	0	0	ENOG411206Y(U:Intracellular trafficking, secretion, and vesicular transport); ENOG41113K9(S:Function unknown)	ENOG411206Y(Exocyst complex component); ENOG41113K9(-)	PF13359.7(DDE_Tnp_4:DDE superfamily endonuclease); PF04827.15(Plant_tran:Plant transposon protein)	sp|Q9M2U3|ALPL_ARATH(Protein ALP1-like OS=Arabidopsis thaliana OX=3702 GN=At3g55350 PE=2 SV=1)	114125161
LOC114123074	early nodulin-75-like	1201	490	307	323	155	77	265	35.59	21.46	24.63	15.59	6.41	29.79	27.2267	17.2633	0.39224	-1.35019	0.000471088	0.00745997	yes	down	XP_027841736.1(LOW QUALITY PROTEIN: early nodulin-75-like [Aphis gossypii])	0	0	0	0	0	0	0	0	114123074
LOC114125358	myogenesis-regulating glycosidase-like	2041	14925.8	28698.6	13527.8	1491.09	965.32	2909.7	426.78	720.1	422.9	40.22	27.51	84.93	523.26	50.8867	0.0858981	-3.54123	4e-12	3.4e-10	yes	down	XP_027844774.1(myogenesis-regulating glycosidase-like [Aphis gossypii])	GO:0005975(biological_process:carbohydrate metabolic process); GO:0004553(molecular_function:hydrolase activity, hydrolyzing O-glycosyl compounds)	0	0	0	COG1501(G:Carbohydrate transport and metabolism)	COG1501(hydrolase, family 31)	PF01055.27(Glyco_hydro_31:Glycosyl hydrolases family 31); PF02065.19(Melibiase:Melibiase)	sp|Q6NSJ0|MYORG_HUMAN(Myogenesis-regulating glycosidase OS=Homo sapiens OX=9606 GN=MYORG PE=1 SV=2)	114125358
LOC114131409	zinc finger MYM-type protein 1-like	2474	28	47	21	7	7	11	0.64	0.95	0.53	0.15	0.16	0.26	0.706667	0.19	0.238972	-2.06508	0.000186954	0.00349662	yes	down	XP_027852414.1(zinc finger MYM-type protein 1-like [Aphis gossypii])	0	0	0	0	ENOG410XQ1Y(S:Function unknown)	ENOG410XQ1Y(zinc finger)	PF14291.7(DUF4371:Domain of unknown function (DUF4371)); PF05699.15(Dimer_Tnp_hAT:hAT family C-terminal dimerisation region)	sp|Q5SVZ6|ZMYM1_HUMAN(Zinc finger MYM-type protein 1 OS=Homo sapiens OX=9606 GN=ZMYM1 PE=1 SV=1)	114131409
LOC114119259	acetyl-coenzyme A transporter 1-like	725	83	86	153	33	44	62	7.3	7.66	14.85	3.08	4.77	6.46	9.93667	4.77	0.386262	-1.37235	0.000170482	0.00324142	yes	down	XP_027836567.1(acetyl-coenzyme A transporter 1-like [Aphis gossypii])	GO:0008521(molecular_function:acetyl-CoA transporter activity); GO:0016021(cellular_component:integral component of membrane)	K03372	ACATN, SLC33A1	map00604(Glycosphingolipid biosynthesis - ganglio series)	COG0477(G:Carbohydrate transport and metabolism)	COG0477(major facilitator Superfamily)	PF13000.8(Acatn:Acetyl-coenzyme A transporter 1)	sp|O00400|ACATN_HUMAN(Acetyl-coenzyme A transporter 1 OS=Homo sapiens OX=9606 GN=SLC33A1 PE=1 SV=1)	114119259
LOC114128010	glycoprotein 3-alpha-L-fucosyltransferase A-like	2111	157	174	189	78	85	68	4.32	4.2	5.68	2.02	2.33	1.91	4.73333	2.08667	0.404456	-1.30594	2.97e-08	1.46e-06	yes	down	XP_027848217.1(glycoprotein 3-alpha-L-fucosyltransferase A-like [Aphis gossypii])	GO:0032580(cellular_component:Golgi cisterna membrane); GO:0016021(cellular_component:integral component of membrane); GO:0006486(biological_process:protein glycosylation); GO:0008417(molecular_function:fucosyltransferase activity)	K00753	E2.4.1.214	map00513(Various types of N-glycan biosynthesis)	ENOG410ZIMX(S:Function unknown)	ENOG410ZIMX((Alpha (1,3) fucosyltransferase)	PF00852.20(Glyco_transf_10:Glycosyltransferase family 10 (fucosyltransferase) C-term); PF17039.6(Glyco_tran_10_N:Fucosyltransferase, N-terminal)	sp|Q9VUL9|FUCTA_DROME(Glycoprotein 3-alpha-L-fucosyltransferase A OS=Drosophila melanogaster OX=7227 GN=FucTA PE=2 SV=2)	114128010
LOC114132059	uncharacterized LOC114132059	738	2376.33	2569.33	1559.67	5230	4850	6688.33	268.81	248.28	189.45	553.27	543.13	768.13	235.513	621.51	2.33748	1.22495	1.26e-09	7.63e-08	yes	up	XP_027853238.1(uncharacterized protein LOC114132059 [Aphis gossypii])	0	0	0	0	0	0	0	0	114132059
LOC114122920	UDP-glucuronosyltransferase 2C1-like	2298	76	48	35	102	144	113	1.89	1.05	0.95	2.4	3.58	2.88	1.29667	2.95333	2.02276	1.01633	0.00435394	0.045093	yes	up	XP_027841526.1(UDP-glucuronosyltransferase 2C1-like [Aphis gossypii])	GO:0015020(molecular_function:glucuronosyltransferase activity); GO:0016021(cellular_component:integral component of membrane)	K00699	UGT	map05204(Chemical carcinogenesis); map00983(Drug metabolism - other enzymes); map00982(Drug metabolism - cytochrome P450); map00980(Metabolism of xenobiotics by cytochrome P450); map00040(Pentose and glucuronate interconversions); map00860(Porphyrin and chlorophyll metabolism); map00053(Ascorbate and aldarate metabolism); map00830(Retinol metabolism); map00140(Steroid hormone biosynthesis)	COG1819(S:Function unknown)	COG1819(Transferase)	PF00201.19(UDPGT:UDP-glucoronosyl and UDP-glucosyl transferase); PF04101.17(Glyco_tran_28_C:Glycosyltransferase family 28 C-terminal domain); PF13579.7(Glyco_trans_4_4:Glycosyl transferase 4-like domain)	sp|P19488|UDB37_RAT(UDP-glucuronosyltransferase 2B37 OS=Rattus norvegicus OX=10116 GN=Ugt2b37 PE=2 SV=1)	114122920
LOC114121889	DNA mismatch repair protein Mlh1	2077	181	199	188	349	515	429	4.86	4.79	5.45	8.89	13.91	11.96	5.03333	11.5867	2.06231	1.04426	4.13e-08	1.98e-06	yes	up	XP_027840187.1(DNA mismatch repair protein Mlh1 [Aphis gossypii])	GO:0006298(biological_process:mismatch repair); GO:0032300(cellular_component:mismatch repair complex); GO:0016887(molecular_function:ATPase activity); GO:0005524(molecular_function:ATP binding); GO:0030983(molecular_function:mismatched DNA binding)	K08734	MLH1	map05210(Colorectal cancer); map05213(Endometrial cancer); map03430(Mismatch repair); map05200(Pathways in cancer); map03460(Fanconi anemia pathway); map05226(Gastric cancer); map01524(Platinum drug resistance)	COG0323(E:Amino acid transport and metabolism)	COG0323(Catalyzes the production of spermidine from putrescine and decarboxylated S-adenosylmethionine (dcSAM), which serves as an aminopropyl donor (By similarity))	PF16413.6(Mlh1_C:DNA mismatch repair protein Mlh1 C-terminus); PF01119.20(DNA_mis_repair:DNA mismatch repair protein, C-terminal domain); PF13589.7(HATPase_c_3:Histidine kinase-, DNA gyrase B-, and HSP90-like ATPase); PF02518.27(HATPase_c:Histidine kinase-, DNA gyrase B-, and HSP90-like ATPase)	sp|Q9JK91|MLH1_MOUSE(DNA mismatch repair protein Mlh1 OS=Mus musculus OX=10090 GN=Mlh1 PE=1 SV=2)	114121889
LOC114124639	NADH dehydrogenase [ubiquinone] 1 alpha subcomplex subunit 2-like	618	0	0	0	938.18	923.21	594.85	0	0	0	123.18	128.39	84.99	0	112.187	4084.63	11.996	2.76e-23	6.47e-21	yes	up	XP_027843753.1(NADH dehydrogenase [ubiquinone] 1 alpha subcomplex subunit 2-like [Aphis gossypii])	0	K03946	NDUFA2	map04932(Non-alcoholic fatty liver disease (NAFLD)); map05012(Parkinson disease); map05010(Alzheimer disease); map04723(Retrograde endocannabinoid signaling); map05016(Huntington disease); map04714(Thermogenesis); map00190(Oxidative phosphorylation)	ENOG41124JV(I:Lipid transport and metabolism)	ENOG41124JV(Accessory subunit of the mitochondrial membrane respiratory chain NADH dehydrogenase (Complex I), that is believed not to be involved in catalysis. Complex I functions in the transfer of electrons from NADH to the respiratory chain. The immediate electron acceptor for the enzyme is believed to be ubiquinone)	PF05047.17(L51_S25_CI-B8:Mitochondrial ribosomal protein L51 / S25 / CI-B8 domain)	sp|P0CB79|NDUA2_PONAB(NADH dehydrogenase [ubiquinone] 1 alpha subcomplex subunit 2 OS=Pongo abelii OX=9601 GN=NDUFA2 PE=3 SV=1)	114124639
LOC114133071	uncharacterized LOC114133071	1034	0	0	0	20.44	9.72	40.68	0	0	0	1.3	0.65	2.8	0	1.58333	115.117	6.84696	1.21e-06	4.2e-05	yes	up	XP_027854495.1(uncharacterized protein LOC114133071 [Aphis gossypii])	GO:0016021(cellular_component:integral component of membrane)	0	0	0	0	0	0	0	114133071
LOC114130757	dynein heavy chain 3, axonemal-like	14405	18.51	41.93	20.9	114.84	109.72	144.22	0.07	0.27	0.2	1.86	1.65	2.5	0.18	2.00333	4.14281	2.05061	7.16e-10	4.61e-08	yes	up	XP_027851607.1(dynein heavy chain 3, axonemal-like [Aphis gossypii])	GO:0030286(cellular_component:dynein complex); GO:0016021(cellular_component:integral component of membrane); GO:0007018(biological_process:microtubule-based movement); GO:0003777(molecular_function:microtubule motor activity); GO:0005524(molecular_function:ATP binding)	K10408	DNAH	map05016(Huntington disease)	COG5245(S:Function unknown)	COG5245(Alpha beta hydrolase)	PF18199.2(Dynein_C:Dynein heavy chain C-terminal domain); PF08393.14(DHC_N2:Dynein heavy chain, N-terminal region 2); PF18198.2(AAA_lid_11:Dynein heavy chain AAA lid domain); PF12780.8(AAA_8:P-loop containing dynein motor region D4); PF12781.8(AAA_9:ATP-binding dynein motor region); PF03028.16(Dynein_heavy:Dynein heavy chain region D6 P-loop domain); PF12775.8(AAA_7:P-loop containing dynein motor…	sp|Q8TD57|DYH3_HUMAN(Dynein heavy chain 3, axonemal OS=Homo sapiens OX=9606 GN=DNAH3 PE=2 SV=1)	114130757
LOC114121387	uncharacterized LOC114121387	817	16	24	17	0	0	0	1.53	1.97	1.75	0	0	0	1.75	0	0.0088803	-6.81518	4.79e-07	1.82e-05	yes	down	XP_027839495.1(uncharacterized protein LOC114121387, partial [Aphis gossypii])	GO:0015074(biological_process:DNA integration); GO:0003676(molecular_function:nucleic acid binding)	0	0	0	COG2801(O:Posttranslational modification, protein turnover, chaperones); ENOG410Y7Q4(O:Posttranslational modification, protein turnover, chaperones)	COG2801(26s proteasome); ENOG410Y7Q4(26s proteasome)	PF05380.14(Peptidase_A17:Pao retrotransposon peptidase); PF00078.28(RVT_1:Reverse transcriptase (RNA-dependent DNA polymerase))	0	114121387
LOC114127363	trehalase-like	1908	0	0	0	4	5	9	0	0	0	0.12	0.15	0.28	0	0.183333	29.1938	4.86759	0.00488819	0.0491607	yes	up	XP_027847383.1(trehalase-like [Aphis gossypii])	GO:0004555(molecular_function:alpha,alpha-trehalase activity); GO:0005991(biological_process:trehalose metabolic process)	K01194	TREH, treA, treF	map00500(Starch and sucrose metabolism)	COG1626(S:Function unknown)	COG1626(Zinc finger, FYVE domain containing)	PF01204.19(Trehalase:Trehalase)	sp|A8J4S9|TREA_APIME(Trehalase OS=Apis mellifera OX=7460 PE=1 SV=1)	114127363
LOC114124809	histone H1A, sperm-like	725	80	80	68	47	45	23	9.28	7.91	8.46	5.11	5.18	2.72	8.55	4.33667	0.462643	-1.11203	0.00286331	0.0328468	yes	down	XP_027843983.1(histone H1A, sperm-like [Aphis gossypii])	0	K11275	H1_5	0	ENOG41120CT(B:Chromatin structure and dynamics)	ENOG41120CT(histone h1)	PF00538.20(Linker_histone:linker histone H1 and H5 family)	sp|P02255|H1_DROME(Histone H1 OS=Drosophila melanogaster OX=7227 GN=His1 PE=1 SV=1)	114124809
LOC114124191	glucose dehydrogenase [FAD, quinone]-like	2485	0	0	0	5.39	4.11	10.44	0	0	0	0.12	0.09	0.24	0	0.15	30.8621	4.94777	0.00394408	0.0420181	yes	up	XP_027843180.1(glucose dehydrogenase [FAD, quinone]-like [Aphis gossypii])	GO:0050660(molecular_function:flavin adenine dinucleotide binding); GO:0016614(molecular_function:oxidoreductase activity, acting on CH-OH group of donors)	K00115	GLD	map00030(Pentose phosphate pathway)	COG2303(E:Amino acid transport and metabolism)	COG2303(oxidoreductase)	PF00732.20(GMC_oxred_N:GMC oxidoreductase); PF05199.14(GMC_oxred_C:GMC oxidoreductase); PF01266.25(DAO:FAD dependent oxidoreductase)	sp|P18172|DHGL_DROPS(Glucose dehydrogenase [FAD, quinone] OS=Drosophila pseudoobscura pseudoobscura OX=46245 GN=Gld PE=3 SV=4)	114124191
LOC114124695	uncharacterized LOC114124695	1408	734	687	748	347	458	289	35.15	28.8	39.01	15.7	22.05	14.28	34.32	17.3433	0.457631	-1.12774	2.49e-07	9.94e-06	yes	down	XP_027843839.1(uncharacterized protein LOC114124695 [Aphis gossypii])	0	0	0	0	0	0	0	0	114124695
LOC114130750	lipase 3-like	2310	0	0	0	66.03	24.55	44.83	0	0	0	1.54	0.61	1.13	0	1.09333	226.679	7.8245	2.39e-09	1.39e-07	yes	up	XP_027851601.1(lipase 3-like [Aphis gossypii])	GO:0016787(molecular_function:hydrolase activity); GO:0006629(biological_process:lipid metabolic process)	K01052	LIPA	map04979(Cholesterol metabolism); map04142(Lysosome); map00100(Steroid biosynthesis)	COG0596(S:Function unknown)	COG0596(Alpha beta hydrolase)	PF04083.17(Abhydro_lipase:Partial alpha/beta-hydrolase lipase region); PF00561.21(Abhydrolase_1:alpha/beta hydrolase fold); PF12146.9(Hydrolase_4:Serine aminopeptidase, S33)	sp|O46108|LIP3_DROME(Lipase 3 OS=Drosophila melanogaster OX=7227 GN=Lip3 PE=2 SV=1)	114130750
LOC114125039	uncharacterized LOC114125039	642	40	56	42	22	24	21	5.75	6.79	6.43	2.95	3.41	3.07	6.32333	3.14333	0.44456	-1.16955	0.00182979	0.0229273	yes	down	XP_027844315.1(uncharacterized protein LOC114125039 [Aphis gossypii])	0	0	0	0	0	0	0	0	114125039
LOC114131091	glycine, alanine and asparagine-rich protein-like	653	1345	1544	1307	352	298	360	187.44	181.83	194.29	45.83	41.1	51.01	187.853	45.98	0.219294	-2.18906	7.4e-50	9.42e-47	yes	down	XP_027852034.1(glycine, alanine and asparagine-rich protein-like, partial [Aphis gossypii])	0	0	0	0	0	0	0	0	114131091
LOC114131131	uncharacterized LOC114131131	1215	1351	1294	871	729	517	443	73.31	61.07	51.37	37.23	27.92	24.52	61.9167	29.89	0.441034	-1.18104	7.99e-06	0.000229667	yes	down	XP_027852076.1(uncharacterized protein LOC114131131 [Aphis gossypii])	GO:0016021(cellular_component:integral component of membrane)	0	0	0	ENOG4111H7U(S:Function unknown)	ENOG4111H7U(Protein of unknown function (DUF1676))	PF07898.14(DUF1676:Protein of unknown function (DUF1676))	0	114131131
LOC114121272	phosphoenolpyruvate carboxykinase [GTP]-like	2308	4802	5762	3190	12333	8988	12717	119.1	125.57	86.57	288.61	222.26	322.02	110.413	277.63	2.26522	1.17965	1.13e-07	4.88e-06	yes	up	XP_027839326.1(phosphoenolpyruvate carboxykinase [GTP]-like [Aphis gossypii])	GO:0004613(molecular_function:phosphoenolpyruvate carboxykinase (GTP) activity); GO:0016301(molecular_function:kinase activity); GO:0006094(biological_process:gluconeogenesis); GO:0005525(molecular_function:GTP binding)	K01596	E4.1.1.32, pckA, PCK	map04920(Adipocytokine signaling pathway); map04964(Proximal tubule bicarbonate reclamation); map00620(Pyruvate metabolism); map04068(FoxO signaling pathway); map00010(Glycolysis / Gluconeogenesis); map04922(Glucagon signaling pathway); map04910(Insulin signaling pathway); map03320(PPAR signaling pathway); map00020(Citrate cycle (TCA cycle)); map04151(PI3K-Akt signaling pathway); map04152(AMPK si…	COG1274(C:Energy production and conversion)	COG1274(Catalyzes the conversion of oxaloacetate (OAA) to phosphoenolpyruvate (PEP), the rate-limiting step in the metabolic pathway that produces glucose from lactate and other precursors derived from the citric acid cycle (By similarity))	PF00821.19(PEPCK_GTP:Phosphoenolpyruvate carboxykinase C-terminal P-loop domain); PF17297.3(PEPCK_N:Phosphoenolpyruvate carboxykinase N-terminal domain)	sp|Q16822|PCKGM_HUMAN(Phosphoenolpyruvate carboxykinase [GTP], mitochondrial OS=Homo sapiens OX=9606 GN=PCK2 PE=1 SV=4)	114121272
LOC114128186	maltase 2-like	2036	6660	10118	6240.99	2134.51	2099.03	2258.86	172.57	236.58	184.03	52.49	54.5	61.34	197.727	56.11	0.259527	-1.94604	6.86e-33	2.71e-30	yes	down	XP_027848440.1(maltase 2-like [Aphis gossypii])	GO:0003824(molecular_function:catalytic activity); GO:0005975(biological_process:carbohydrate metabolic process)	K01187	malZ	map00500(Starch and sucrose metabolism); map00052(Galactose metabolism)	COG0366(G:Carbohydrate transport and metabolism)	COG0366(alpha amylase, catalytic)	PF00128.25(Alpha-amylase:Alpha amylase, catalytic domain)	sp|O16099|MAL2_DROVI(Maltase 2 OS=Drosophila virilis OX=7244 GN=Mal-B2 PE=3 SV=2)	114128186
LOC114130439	putative nuclease HARBI1	1137	42	29	38	0	0	0	2.49	1.49	2.45	0	0	0	2.14333	0	0.00454372	-7.78191	1.46e-09	8.67e-08	yes	down	XP_027851215.1(putative nuclease HARBI1, partial [Aphis gossypii])	0	K23222	HARBI1	0	ENOG411206Y(L:Replication, recombination and repair)	ENOG411206Y(Retrotransposon protein)	PF13359.7(DDE_Tnp_4:DDE superfamily endonuclease); PF04827.15(Plant_tran:Plant transposon protein); PF01609.22(DDE_Tnp_1:Transposase DDE domain)	sp|Q6AZB8|HARB1_DANRE(Putative nuclease HARBI1 OS=Danio rerio OX=7955 GN=harbi1 PE=2 SV=1)	114130439
LOC114121915	SOSS complex subunit C homolog	566	102	69	51	173	200	188	18.76	10.57	9.91	29.61	36.29	35.1	13.08	33.6667	2.26957	1.18242	9.76e-05	0.00199799	yes	up	XP_027840227.1(SOSS complex subunit C homolog [Aphis gossypii])	GO:0070876(cellular_component:SOSS complex); GO:0006281(biological_process:DNA repair)	0	0	0	ENOG4111QHU(S:Function unknown)	ENOG4111QHU(INTS3 and NABP interacting protein)	PF15925.6(SOSSC:SOSS complex subunit C)	sp|B4KZN6|SOSSC_DROMO(SOSS complex subunit C homolog OS=Drosophila mojavensis OX=7230 GN=GI11782 PE=3 SV=1)	114121915
LOC114127089	zinc finger protein Noc-like	547	58	70	57	31	27	24	11.46	11.47	11.86	5.7	5.26	4.81	11.5967	5.25667	0.405656	-1.30167	0.000139135	0.00273148	yes	down	XP_027847023.1(zinc finger protein Noc-like [Aphis gossypii])	GO:0003676(molecular_function:nucleic acid binding)	0	0	0	ENOG4111GK8(S:Function unknown); ENOG4111EZY(S:Function unknown)	ENOG4111GK8(zinc finger protein); ENOG4111EZY(Zinc finger protein)	0	sp|Q24423|NOC_DROME(Zinc finger protein Noc OS=Drosophila melanogaster OX=7227 GN=noc PE=1 SV=1)	114127089
LOC114125576	esterase E4-like, transcript variant X1	2063	8732	14338	9743	5087	4365	5842	241.77	350.97	296.31	132.55	118.94	165.59	296.35	139.027	0.428726	-1.22187	1.14e-12	1.02e-10	yes	down	XP_027845094.1(esterase E4-like [Aphis gossypii])	GO:0016787(molecular_function:hydrolase activity)	K03927	CES2	map00983(Drug metabolism - other enzymes)	COG2272(S:Function unknown)	COG2272(-)	PF00135.29(COesterase:Carboxylesterase family); PF07859.14(Abhydrolase_3:alpha/beta hydrolase fold)	sp|P35502|ESTF_MYZPE(Esterase FE4 OS=Myzus persicae OX=13164 PE=1 SV=1)	114125576
LOC114127133	sugar transporter SWEET1-like	841	776	670	611	329	474	330	70.94	52.6	60.21	28.22	43.02	30.72	61.25	33.9867	0.49733	-1.00772	3.96e-06	0.000123926	yes	down	KAF0751343.1(sugar transporter SWEET1-like [Aphis craccivora])	GO:0016021(cellular_component:integral component of membrane); GO:0008643(biological_process:carbohydrate transport)	K15382	SLC50A, SWEET	0	ENOG4111M4R(U:Intracellular trafficking, secretion, and vesicular transport)	ENOG4111M4R(sugar transporter)	PF03083.17(MtN3_slv:Sugar efflux transporter for intercellular exchange)	sp|Q7JVE7|SWET1_DROME(Sugar transporter SWEET1 OS=Drosophila melanogaster OX=7227 GN=slv PE=2 SV=1)	114127133
LOC114128101	uncharacterized LOC114128101, transcript variant X2	671	92	190	77	11	8	16	12.19	21.31	10.89	1.36	1.05	2.16	14.7967	1.52333	0.0902789	-3.46947	6.97e-15	7.99e-13	yes	down	XP_027848331.1(uncharacterized protein LOC114128101 [Aphis gossypii])	0	0	0	0	0	0	0	0	114128101
LOC114132042	uncharacterized LOC114132042	2004	0	0	0	13	6	4	0	0	0	0.36	0.17	0.12	0	0.216667	38.8274	5.279	0.00156429	0.0202194	yes	up	XP_027853219.1(uncharacterized protein LOC114132042 [Aphis gossypii])	GO:0005634(cellular_component:nucleus); GO:0046872(molecular_function:metal ion binding); GO:0003677(molecular_function:DNA binding)	0	0	0	ENOG4111YDA(S:Function unknown); ENOG4110DDB(S:Function unknown); COG2801(L:Replication, recombination and repair)	ENOG4111YDA(Pfam:DDE); ENOG4110DDB(Conserved hypothetical, protein); COG2801(Retrotransposon protein)	PF03184.20(DDE_1:DDE superfamily endonuclease); PF03221.17(HTH_Tnp_Tc5:Tc5 transposase DNA-binding domain); PF05225.17(HTH_psq:helix-turn-helix, Psq domain)	0	114132042
LOC114126925	proton channel OtopLc-like, transcript variant X1	2594	698.59	303.59	520.15	235.31	167.72	92.22	15.68	6.42	13.09	5.68	4.51	2.39	11.73	4.19333	0.293375	-1.76918	1.23e-05	0.000336028	yes	down	KAF0764213.1(proton channel OtopLc-like isoform X1, partial [Aphis craccivora])	0	0	0	0	ENOG410XVS5(S:Function unknown)	ENOG410XVS5(Otopetrin)	PF03189.14(Otopetrin:Otopetrin)	sp|B7Z0W9|OTOP_DROME(Proton channel OtopLc OS=Drosophila melanogaster OX=7227 GN=OtopLc PE=3 SV=2)	114126925
LOC114125573	aldehyde dehydrogenase-like, transcript variant X1	1640	9832	16467	10672	4828	5347	4403	343.01	504.31	405.59	158.41	186.41	156.35	417.637	167.057	0.36465	-1.45541	5.71e-16	7.27e-14	yes	down	XP_027845089.1(aldehyde dehydrogenase-like isoform X1 [Aphis gossypii])	GO:0016620(molecular_function:oxidoreductase activity, acting on the aldehyde or oxo group of donors, NAD or NADP as acceptor)	K00128	ALDH	map00310(Lysine degradation); map00561(Glycerolipid metabolism); map00981(Insect hormone biosynthesis); map00340(Histidine metabolism); map00330(Arginine and proline metabolism); map00053(Ascorbate and aldarate metabolism); map00380(Tryptophan metabolism); map00010(Glycolysis / Gluconeogenesis); map00620(Pyruvate metabolism); map00071(Fatty acid degradation); map00280(Valine, leucine and isoleuci…	COG1012(C:Energy production and conversion)	COG1012(Dehydrogenase)	PF00171.23(Aldedh:Aldehyde dehydrogenase family)	sp|Q27640|ALDH_ENCBU(Aldehyde dehydrogenase OS=Enchytraeus buchholzi OX=34589 GN=ALDH PE=2 SV=1)	114125573
LOC114132052	uncharacterized LOC114132052	1861	7	12	11	2	0	1	0.22	0.34	0.38	0.06	0	0.03	0.313333	0.03	0.0924409	-3.43532	0.00354102	0.0388512	yes	down	XP_027853230.1(uncharacterized protein LOC114132052 [Aphis gossypii])	0	K23209	THAP9	0	ENOG4111JB0(S:Function unknown); ENOG410Z5Z4(S:Function unknown)	ENOG4111JB0(-); ENOG410Z5Z4(THAP domain)	PF12017.9(Tnp_P_element:Transposase protein)	0	114132052
LOC114132385	uncharacterized LOC114132385	1170	5062	7090	6385	3134	1993	3764	288.79	351.47	395.71	168.23	113.13	218.98	345.323	166.78	0.43783	-1.19156	5.4e-08	2.5e-06	yes	down	KAE9542687.1(hypothetical protein AGLY_002598 [Aphis glycines])	0	0	0	0	0	0	0	0	114132385
LOC114122271	zinc finger MYM-type protein 1-like	2005	6	15	17	0	0	0	0.18	0.38	0.54	0	0	0	0.366667	0	0.0133821	-6.22356	2.41e-05	0.000597086	yes	down	XP_027840680.1(zinc finger MYM-type protein 1-like [Aphis gossypii])	0	0	0	0	ENOG410Z0SF(S:Function unknown); ENOG410YI05(S:Function unknown); ENOG4110ZMY(S:Function unknown); ENOG410XQ1Y(S:Function unknown)	ENOG410Z0SF(ZnF_TTF); ENOG410YI05(52 kDa repressor of the inhibitor of the protein); ENOG4110ZMY(protein-kinase, interferon-inducible double stranded RNA dependent inhibitor, repressor of (P58 repressor)); ENOG410XQ1Y(zinc finger)	PF14291.7(DUF4371:Domain of unknown function (DUF4371))	sp|O43422|P52K_HUMAN(52 kDa repressor of the inhibitor of the protein kinase OS=Homo sapiens OX=9606 GN=THAP12 PE=1 SV=2)	114122271
LOC114124800	uncharacterized LOC114124800	1804	26	18	20.76	0	0	0	0.86	0.52	0.75	0	0	0	0.71	0	0.00762276	-7.03547	1.6e-07	6.64e-06	yes	down	XP_027843975.1(uncharacterized protein LOC114124800 [Aphis gossypii])	0	0	0	0	ENOG410ZP20(S:Function unknown)	ENOG410ZP20(-)	PF10551.10(MULE:MULE transposase domain); PF00872.19(Transposase_mut:Transposase, Mutator family)	0	114124800
LOC114130151	hydroxyacyl-coenzyme A dehydrogenase, mitochondrial pseudogene	1198	216.13	276.15	195.99	2684.37	2250.95	1233.33	11.95	13.27	11.77	139.65	123.82	69.53	12.33	111	8.33408	3.05902	9.36e-26	2.68e-23	yes	up	XP_027850872.1(hydroxyacyl-coenzyme A dehydrogenase, mitochondrial-like [Aphis gossypii])	GO:0006631(biological_process:fatty acid metabolic process); GO:0003857(molecular_function:3-hydroxyacyl-CoA dehydrogenase activity); GO:0070403(molecular_function:NAD+ binding)	K00022	HADH	map00310(Lysine degradation); map00280(Valine, leucine and isoleucine degradation); map00062(Fatty acid elongation); map00650(Butanoate metabolism); map00071(Fatty acid degradation); map00380(Tryptophan metabolism)	COG1250(I:Lipid transport and metabolism)	COG1250(Dehydrogenase)	0	sp|Q61425|HCDH_MOUSE(Hydroxyacyl-coenzyme A dehydrogenase, mitochondrial OS=Mus musculus OX=10090 GN=Hadh PE=1 SV=2)	114130151
LOC114122698	ribonucleoside-diphosphate reductase subunit M2-like, transcript variant X1	1607	87.42	139.14	189.36	1175.79	1270.57	1229.82	3.2	4.6	7.86	39.75	45.25	45.01	5.22	43.3367	8.09207	3.01651	9.38e-37	4.89e-34	yes	up	XP_027841242.1(ribonucleoside-diphosphate reductase subunit M2-like isoform X1 [Aphis gossypii])	GO:0009263(biological_process:deoxyribonucleotide biosynthetic process); GO:0016021(cellular_component:integral component of membrane); GO:0016491(molecular_function:oxidoreductase activity)	K10808	RRM2	map00240(Pyrimidine metabolism); map00480(Glutathione metabolism); map00983(Drug metabolism - other enzymes); map00230(Purine metabolism); map04115(p53 signaling pathway)	COG0208(F:Nucleotide transport and metabolism)	COG0208(Provides the precursors necessary for DNA synthesis. Catalyzes the biosynthesis of deoxyribonucleotides from the corresponding ribonucleotides (By similarity))	PF00268.22(Ribonuc_red_sm:Ribonucleotide reductase, small chain)	sp|P48592|RIR2_DROME(Ribonucleoside-diphosphate reductase subunit M2 OS=Drosophila melanogaster OX=7227 GN=RnrS PE=1 SV=2)	114122698
LOC114122010	vesicular glutamate transporter 2-like	1671	23.14	24.19	25.99	79.1	88.16	77.42	0.84	0.77	1.03	2.71	3.19	2.87	0.88	2.92333	3.03977	1.60396	1e-06	3.53e-05	yes	up	XP_027840352.1(vesicular glutamate transporter 2-like [Aphis gossypii])	GO:0016021(cellular_component:integral component of membrane)	K12302	SLC17A6_7_8	map04724(Glutamatergic synapse); map04723(Retrograde endocannabinoid signaling); map04721(Synaptic vesicle cycle); map05033(Nicotine addiction)	ENOG410ZVIF(G:Carbohydrate transport and metabolism); ENOG410XPWC(G:Carbohydrate transport and metabolism)	ENOG410ZVIF(Vesicular glutamate transporter); ENOG410XPWC(solute carrier family 17)	0	sp|Q9P2U8|VGLU2_HUMAN(Vesicular glutamate transporter 2 OS=Homo sapiens OX=9606 GN=SLC17A6 PE=2 SV=1)	114122010
LOC114127921	dynein heavy chain 6, axonemal-like	8642	8	36	17	79	55	69	0.17	0.29	0.16	1.12	0.91	0.94	0.206667	0.99	3.13329	1.64768	0.000561481	0.00860612	yes	up	XP_027848086.1(LOW QUALITY PROTEIN: dynein heavy chain 6, axonemal-like [Aphis gossypii])	GO:0030286(cellular_component:dynein complex); GO:0007018(biological_process:microtubule-based movement); GO:0003777(molecular_function:microtubule motor activity); GO:0005524(molecular_function:ATP binding)	K10408	DNAH	map05016(Huntington disease)	COG5245(Z:Cytoskeleton)	COG5245(heavy chain)	PF12774.8(AAA_6:Hydrolytic ATP binding site of dynein motor region); PF12780.8(AAA_8:P-loop containing dynein motor region D4); PF18199.2(Dynein_C:Dynein heavy chain C-terminal domain); PF12781.8(AAA_9:ATP-binding dynein motor region); PF12775.8(AAA_7:P-loop containing dynein motor region); PF12777.8(MT:Microtubule-binding stalk of dynein motor); PF18198.2(AAA_lid_11:Dynein heavy chain AAA lid do…	sp|Q9C0G6|DYH6_HUMAN(Dynein heavy chain 6, axonemal OS=Homo sapiens OX=9606 GN=DNAH6 PE=2 SV=3)	114127921
LOC114119969		1316	204	297	216	2	0	4	9.97	12.65	11.49	0.09	0	0.2	11.37	0.0966667	0.00765065	-7.0302	1.54e-28	5.03e-26	yes	down	XP_003244309.1(protein ALP1-like [Acyrthosiphon pisum])	0	0	0	0	ENOG41117SD(S:Function unknown); ENOG411206Y(S:Function unknown)	ENOG41117SD(-); ENOG411206Y(transposon protein)	0	sp|Q96MB7|HARB1_HUMAN(Putative nuclease HARBI1 OS=Homo sapiens OX=9606 GN=HARBI1 PE=1 SV=1)	114119969
LOC114125146	cytochrome P450 4C1-like, transcript variant X1	2104	239	275.99	253	88	78	197.12	6.44	6.53	7.46	2.24	2.1	5.43	6.81	3.25667	0.423281	-1.24031	7.68e-05	0.00162821	yes	down	XP_027844467.1(cytochrome P450 4C1-like isoform X1 [Aphis gossypii])	0	K15001	CYP4	0	COG2124(Q:Secondary metabolites biosynthesis, transport and catabolism)	COG2124(Cytochrome p450)	PF00067.23(p450:Cytochrome P450)	sp|P29981|CP4C1_BLADI(Cytochrome P450 4C1 OS=Blaberus discoidalis OX=6981 GN=CYP4C1 PE=2 SV=1)	114125146
LOC114124138	GPI mannosyltransferase 2-like	1507	0	0	0	37.55	29.88	9.23	0	0	0	1.46	1.23	0.39	0	1.02667	129.84	7.02059	7.03e-07	2.58e-05	yes	up	XP_027843123.1(GPI mannosyltransferase 2-like [Aphis gossypii])	GO:0005789(cellular_component:endoplasmic reticulum membrane); GO:0016021(cellular_component:integral component of membrane); GO:0004584(molecular_function:dolichyl-phosphate-mannose-glycolipid alpha-mannosyltransferase activity); GO:0006506(biological_process:GPI anchor biosynthetic process)	K07542	PIGV	map00563(Glycosylphosphatidylinositol (GPI)-anchor biosynthesis)	COG5542(S:Function unknown)	COG5542(Phosphatidylinositol glycan anchor biosynthesis class V)	PF04188.14(Mannosyl_trans2:Mannosyltransferase (PIG-V))	sp|Q5KR61|PIGV_RAT(GPI mannosyltransferase 2 OS=Rattus norvegicus OX=10116 GN=Pigv PE=2 SV=1)	114124138
LOC114129316	myoneurin-like, transcript variant X1	1376	145	163	124	68	58	61	12.69	12.64	10.26	2.96	2.67	2.87	11.8633	2.83333	0.395052	-1.33989	7.39e-08	3.31e-06	yes	down	KAE9532015.1(hypothetical protein AGLY_010217 [Aphis glycines])	GO:0003676(molecular_function:nucleic acid binding)	0	0	0	COG5048(S:Function unknown)	COG5048(Zinc finger protein)	PF00096.27(zf-C2H2:Zinc finger, C2H2 type); PF13894.7(zf-C2H2_4:C2H2-type zinc finger); PF13465.7(zf-H2C2_2:Zinc-finger double domain)	0	114129316
LOC114123488	uncharacterized LOC114123488	1663	162.12	119.28	144.85	57.09	81.79	83.3	5.77	3.7	5.67	1.95	2.96	3.1	5.04667	2.67	0.465838	-1.1021	7.98e-05	0.00167765	yes	down	XP_027842290.1(uncharacterized protein LOC114123481 [Aphis gossypii])	0	0	0	0	0	0	0	0	114123488
LOC114122139	basic-leucine zipper transcription factor A-like	2500	136	80	129	49	10	39	3.08	1.59	3.2	1.05	0.23	0.9	2.62333	0.726667	0.255822	-1.96679	9.49e-05	0.00194969	yes	down	XP_027840510.1(LOW QUALITY PROTEIN: basic-leucine zipper transcription factor A-like [Aphis gossypii])	0	0	0	0	0	0	0	0	114122139
LOC114123527	protein numb homolog, transcript variant X3	1045	11	30	16	105	81	72	0.92	1.96	1.44	6.5	5.44	4.96	1.44	5.63333	4.23234	2.08145	5.07e-07	1.91e-05	yes	up	XP_027842340.1(protein numb homolog [Aphis gossypii])	0	K06057	NUMBL	map04330(Notch signaling pathway)	ENOG410XT15(S:Function unknown)	ENOG410XT15(Numb homolog)	PF00640.24(PID:Phosphotyrosine interaction domain (PTB/PID))	sp|P49757|NUMB_HUMAN(Protein numb homolog OS=Homo sapiens OX=9606 GN=NUMB PE=1 SV=2)	114123527
LOC114125870	mucin-2-like	4908	1275	2299	3781	1313	969	937	13.89	22.1	45.19	13.43	10.47	10.36	27.06	11.42	0.403645	-1.30884	6.7e-05	0.0014576	yes	down	XP_027845463.1(mucin-2-like [Aphis gossypii])	GO:0005576(cellular_component:extracellular region); GO:0008061(molecular_function:chitin binding)	K00665	FASN	map04910(Insulin signaling pathway); map00061(Fatty acid biosynthesis); map04152(AMPK signaling pathway)	ENOG4111Q3Y(S:Function unknown); ENOG4111RTJ(O:Posttranslational modification, protein turnover, chaperones)	ENOG4111Q3Y(Prion protein); ENOG4111RTJ(Chitin binding Peritrophin-A domain)	PF01607.25(CBM_14:Chitin binding Peritrophin-A domain)	0	114125870
LOC114132390	uncharacterized LOC114132390	1253	609.57	871.39	772.51	0	0	32.77	31.76	39.52	43.78	0	0	1.74	38.3533	0.58	0.0125792	-6.31282	0.00390967	0.0416971	yes	down	XP_027853642.1(uncharacterized protein LOC114132390 [Aphis gossypii])	0	0	0	0	0	0	0	0	114132390
LOC114128496	probable cytochrome P450 6a13	1628	37	54	32	124	184	96	1.39	1.77	1.31	4.38	6.87	3.67	1.49	4.97333	3.02514	1.597	4.16e-06	0.000129238	yes	up	XP_027848818.1(probable cytochrome P450 6a13 [Aphis gossypii])	GO:0005506(molecular_function:iron ion binding); GO:0016705(molecular_function:oxidoreductase activity, acting on paired donors, with incorporation or reduction of molecular oxygen); GO:0016021(cellular_component:integral component of membrane); GO:0004497(molecular_function:monooxygenase activity); GO:0020037(molecular_function:heme binding)	K14999	CYP6	0	COG2124(Q:Secondary metabolites biosynthesis, transport and catabolism)	COG2124(Cytochrome p450)	PF00067.23(p450:Cytochrome P450)	sp|Q9V4U9|C6A13_DROME(Probable cytochrome P450 6a13 OS=Drosophila melanogaster OX=7227 GN=Cyp6a13 PE=2 SV=1)	114128496
LOC114119658	scm-like with four MBT domains protein 1, transcript variant X1	3551	144	224	222	79	67	141	2.31	3.07	3.83	1.16	1.02	2.21	3.07	1.46333	0.440799	-1.18181	7.49e-05	0.00160441	yes	down	XP_027837093.1(scm-like with four MBT domains protein 1 isoform X1 [Aphis gossypii])	GO:0006355(biological_process:regulation of transcription, DNA-templated); GO:0005634(cellular_component:nucleus); GO:0016020(cellular_component:membrane); GO:0030246(molecular_function:carbohydrate binding); GO:0003676(molecular_function:nucleic acid binding)	0	0	0	ENOG410XSJM(S:Function unknown)	ENOG410XSJM(Scm-like with four mbt domains)	PF02820.19(MBT:mbt repeat); PF12140.9(SLED:SLED domain)	sp|Q5VUG0|SMBT2_HUMAN(Scm-like with four MBT domains protein 2 OS=Homo sapiens OX=9606 GN=SFMBT2 PE=1 SV=1)	114119658
LOC114131326	uncharacterized LOC114131326	1105	91	95	77	232	245	129	4.99	4.27	4.57	11.21	12.08	7.19	4.61	10.16	2.11688	1.08194	0.000540574	0.00833929	yes	up	XP_027852320.1(uncharacterized protein LOC114131326 [Aphis gossypii])	0	0	0	0	0	0	0	0	114131326
LOC114119539	delta-like protein 1	1260	689	635	662	439	308	325	35.64	28.6	37.25	21.38	15.86	17.15	33.83	18.13	0.491989	-1.0233	3.01e-06	9.65e-05	yes	down	KAF0773462.1(delta-like protein 1, partial [Aphis craccivora])	GO:0007154(biological_process:cell communication); GO:0016021(cellular_component:integral component of membrane); GO:0016020(cellular_component:membrane); GO:0005509(molecular_function:calcium ion binding)	0	0	0	ENOG410Y7WV(S:Function unknown)	ENOG410Y7WV(EGF-like domain)	PF07974.14(EGF_2:EGF-like domain); PF00008.28(EGF:EGF-like domain); PF01414.20(DSL:Delta serrate ligand); PF00053.25(Laminin_EGF:Laminin EGF domain)	sp|Q9JI71|DLL4_MOUSE(Delta-like protein 4 OS=Mus musculus OX=10090 GN=Dll4 PE=1 SV=2)	114119539
LOC114119878	myrosinase 1-like	520	671.88	1711.28	1065.1	464.33	316.59	548.95	148.49	311.39	246.59	95.22	68.87	123	235.49	95.6967	0.358819	-1.47867	2.17e-07	8.78e-06	yes	down	KAF0710581.1(lactase-phlorizin hydrolase-like, partial [Aphis craccivora])	GO:0005975(biological_process:carbohydrate metabolic process); GO:0004553(molecular_function:hydrolase activity, hydrolyzing O-glycosyl compounds)	0	0	0	COG2723(G:Carbohydrate transport and metabolism)	COG2723(beta-glucosidase)	PF00232.19(Glyco_hydro_1:Glycosyl hydrolase family 1)	sp|Q95X01|MYRO1_BREBR(Myrosinase 1 OS=Brevicoryne brassicae OX=69196 PE=1 SV=1)	114119878
LOC114131568	uncharacterized LOC114131568, transcript variant X1	1713	2259.86	2544.61	1960.69	611	586.47	565	78.94	77.98	74.97	20.18	20.64	20.13	77.2967	20.3167	0.237723	-2.07265	6.07e-43	3.87e-40	yes	down	XP_027852621.1(uncharacterized protein LOC114131568 isoform X1 [Aphis gossypii])	GO:0022857(molecular_function:transmembrane transporter activity); GO:0016021(cellular_component:integral component of membrane)	0	0	0	ENOG410YMHR(G:Carbohydrate transport and metabolism)	ENOG410YMHR(Major facilitator superfamily domain containing)	PF12832.8(MFS_1_like:MFS_1 like family); PF07690.17(MFS_1:Major Facilitator Superfamily); PF03825.17(Nuc_H_symport:Nucleoside H+ symporter)	sp|B0UYT5|MFD6B_DANRE(Major facilitator superfamily domain-containing protein 6-B OS=Danio rerio OX=7955 GN=mfsd6b PE=3 SV=1)	114131568
LOC114131575	uncharacterized LOC114131575	487	446	787	487	97	115	82	115.05	165.36	130.51	23.15	29.13	21.42	136.973	24.5667	0.15827	-2.65954	6.63e-29	2.23e-26	yes	down	XP_027852629.1(uncharacterized protein LOC114131575 [Aphis gossypii])	GO:0016021(cellular_component:integral component of membrane)	0	0	0	ENOG410YMHR(G:Carbohydrate transport and metabolism)	ENOG410YMHR(Major facilitator superfamily domain containing)	PF12832.8(MFS_1_like:MFS_1 like family); PF07690.17(MFS_1:Major Facilitator Superfamily)	sp|Q6ZSS7|MFSD6_HUMAN(Major facilitator superfamily domain-containing protein 6 OS=Homo sapiens OX=9606 GN=MFSD6 PE=1 SV=2)	114131575
LOC114127712	uncharacterized LOC114127712	571	3623	6139	3250	1952	1880	2201	654.27	924.31	620.39	328.21	335.08	403.53	732.99	355.607	0.427955	-1.22447	7.31e-10	4.68e-08	yes	down	XP_027847836.1(uncharacterized protein LOC114127712 [Aphis gossypii])	0	0	0	0	0	0	PF01456.18(Mucin:Mucin-like glycoprotein)	0	114127712
LOC114131808	odorant receptor 46a-like, transcript variant X1	691	13	11	1	0	0	0	1.84	1.43	0.18	0	0	0	1.15	0	0.0200044	-5.64354	0.00120173	0.016381	yes	down	KAE9532665.1(hypothetical protein AGLY_009746 [Aphis glycines])	0	K22984	OR	0	ENOG410YKTV(S:Function unknown)	ENOG410YKTV(Odorant receptor)	PF02949.21(7tm_6:7tm Odorant receptor)	0	114131808
LOC114125439	cytochrome b5-like	942	977.78	938.91	812.93	416.67	454.63	489.62	46.65	39.18	42.73	32.01	36.36	37.22	42.8533	35.1967	0.450917	-1.14906	2.25e-13	2.21e-11	yes	down	XP_027844878.1(cytochrome b5-like [Aphis gossypii])	GO:0004252(molecular_function:serine-type endopeptidase activity); GO:0016021(cellular_component:integral component of membrane); GO:0046872(molecular_function:metal ion binding); GO:0020037(molecular_function:heme binding); GO:0016491(molecular_function:oxidoreductase activity)	K23490	CYB5	0	COG5274(C:Energy production and conversion); COG5274(I:Lipid transport and metabolism)	COG5274(cytochrome b5); COG5274(cytochrome b5)	PF00173.29(Cyt-b5:Cytochrome b5-like Heme/Steroid binding domain)	sp|P49096|CYB5_MUSDO(Cytochrome b5 OS=Musca domestica OX=7370 GN=Cyt-b5 PE=1 SV=1)	114125439
LOC114121275	uncharacterized LOC114121275	1613	755	896	856	474	396	379	28.6	29.69	35.37	16.92	14.94	14.65	31.22	15.5033	0.456249	-1.13211	9.77e-11	7.05e-09	yes	down	XP_027839330.1(uncharacterized protein LOC114121275 [Aphis gossypii])	0	0	0	0	ENOG410Z2PV(S:Function unknown)	ENOG410Z2PV(-)	PF00431.21(CUB:CUB domain)	0	114121275
LOC114131003	transcriptional regulatory protein AlgP-like	823	2	3	3	96	128	71	0.19	0.24	0.31	16.18	23	14.5	0.246667	17.8933	33.8087	5.07932	7.71e-16	9.61e-14	yes	up	XP_027851922.1(uncharacterized protein LOC114131003 [Aphis gossypii])	0	0	0	0	0	0	0	0	114131003
LOC114126124	cuticle protein 7-like	604	69.23	46.27	27.58	357	1023	1665.33	9.84	5.55	4.18	51.69	155.58	259.66	6.52333	155.643	18.5579	4.21396	4.78e-10	3.15e-08	yes	up	XP_027845807.1(cuticle protein 7-like [Aphis gossypii])	GO:0042302(molecular_function:structural constituent of cuticle)	0	0	0	ENOG410YXTN(S:Function unknown); ENOG410YXZN(S:Function unknown)	ENOG410YXTN(Cuticular protein); ENOG410YXZN(Cuticular protein)	PF00379.24(Chitin_bind_4:Insect cuticle protein)	sp|P11734|CU08_LOCMI(Cuticle protein 8 OS=Locusta migratoria OX=7004 PE=1 SV=1)	114126124
LOC114131223	uncharacterized LOC114131223	602	0	0	0	55	64	57	0	0	0	8.33	10.27	9.41	0	9.33667	289.766	8.17875	5.01e-11	3.66e-09	yes	up	XP_027852186.1(uncharacterized protein LOC114131223 [Aphis gossypii])	0	0	0	0	ENOG411206Y(S:Function unknown)	ENOG411206Y(transposon protein)	0	0	114131223
LOC114120898	aprataxin	967	168	190	147	80	86	82	12.48	12.19	11.82	5.58	6.35	6.21	12.1633	6.04667	0.447171	-1.1611	1.44e-07	6.13e-06	yes	down	XP_027838783.1(aprataxin [Aphis gossypii])	GO:0033699(molecular_function:DNA 5'-adenosine monophosphate hydrolase activity); GO:0006302(biological_process:double-strand break repair); GO:0000012(biological_process:single strand break repair); GO:0005634(cellular_component:nucleus); GO:0030983(molecular_function:mismatched DNA binding); GO:0003824(molecular_function:catalytic activity); GO:0003725(molecular_function:double-stranded RNA bin…	K10863	APTX	0	ENOG41102F4(S:Function unknown)	ENOG41102F4(DNA-binding protein involved in single-strand DNA break repair, double-strand DNA break repair and base excision repair. Resolves abortive DNA ligation intermediates formed either at base excision sites, or when DNA ligases attempt to repair non- ligatable breaks induced by reactive oxygen species. Catalyzes the release of adenylate groups covalently linked to 5'-phosphate termini, re…	PF11969.9(DcpS_C:Scavenger mRNA decapping enzyme C-term binding); PF01230.24(HIT:HIT domain); PF16278.6(zf-C2HE:C2HE / C2H2 / C2HC zinc-binding finger)	sp|Q8MSG8|APTX_DROME(Aprataxin-like protein OS=Drosophila melanogaster OX=7227 GN=CG5316 PE=2 SV=2)	114120898
LOC114121454	uncharacterized LOC114121454	957	8861.58	12686.3	10836.6	5615.21	5146.84	5132.74	668.17	825.96	883.98	397.75	385.66	394.4	792.703	392.603	0.451042	-1.14866	7.23e-16	9.11e-14	yes	down	0	0	0	0	0	0	0	0	0	114121454
LOC114132214	uncharacterized LOC114132214	2441	223	184	303	153	105	108	5.19	3.76	7.72	3.36	2.44	2.57	5.55667	2.79	0.468041	-1.09529	0.000257228	0.00456296	yes	down	XP_027853415.1(uncharacterized protein LOC114132214 [Aphis gossypii])	0	0	0	0	ENOG410YRBN(S:Function unknown); ENOG41120RA(S:Function unknown); ENOG410YX73(S:Function unknown)	ENOG410YRBN(-); ENOG41120RA(-); ENOG410YX73(-)	PF16009.6(DUF4779:Domain of unknown function (DUF4779))	0	114132214
LOC114131238	protein ALP1-like	649	7	10	6	0	0	0	0.99	1.19	0.9	0	0	0	1.02667	0	0.0220089	-5.50577	0.000493055	0.00773308	yes	down	XP_027852213.1(protein ALP1-like, partial [Aphis gossypii])	0	K23222	HARBI1	0	ENOG411206Y(S:Function unknown)	ENOG411206Y(transposon protein)	PF13359.7(DDE_Tnp_4:DDE superfamily endonuclease); PF04827.15(Plant_tran:Plant transposon protein)	0	114131238
LOC114122287	uncharacterized LOC114122287	710	0	5.05	0	9.43	25.56	38.83	0	0.52	0	1.06	3.26	5.19	0.173333	3.17	13.7377	3.78007	0.000401666	0.00652281	yes	up	KAE9544625.1(hypothetical protein AGLY_000167 [Aphis glycines])	GO:0004803(molecular_function:transposase activity); GO:0006313(biological_process:transposition, DNA-mediated); GO:0003677(molecular_function:DNA binding)	K23206	THAP5_8	0	ENOG410Z0EZ(S:Function unknown); ENOG410ZI26(S:Function unknown)	ENOG410Z0EZ(-); ENOG410ZI26(THAP domain)	PF05485.13(THAP:THAP domain)	0	114122287
LOC114130488	uncharacterized LOC114130488	581	6	2	8	0	0	0	1.05	0.29	1.48	0	0	0	0.94	0	0.0305337	-5.03346	0.00492805	0.0494314	yes	down	XP_027851271.1(uncharacterized protein LOC114130488 [Aphis gossypii])	0	0	0	0	0	0	0	0	114130488
LOC114128664	uncharacterized LOC114128664	1494	29	36	33	66	73	91	0.81	0.92	1.02	1.88	2.22	2.77	0.916667	2.29	2.12874	1.09	0.000427593	0.00683732	yes	up	XP_027849036.1(uncharacterized protein LOC114128664 [Aphis gossypii])	GO:0008270(molecular_function:zinc ion binding); GO:0003676(molecular_function:nucleic acid binding)	0	0	0	ENOG410YWRB(S:Function unknown); COG2801(S:Function unknown)	ENOG410YWRB(Cell wall hydrolase Autolysin); COG2801(Cell wall hydrolase Autolysin)	PF17919.2(RT_RNaseH_2:RNase H-like domain found in reverse transcriptase); PF17917.2(RT_RNaseH:RNase H-like domain found in reverse transcriptase)	sp|P10394|POL4_DROME(Retrovirus-related Pol polyprotein from transposon 412 OS=Drosophila melanogaster OX=7227 GN=POL PE=4 SV=1)	114128664
LOC114121736	acyl-CoA Delta(11) desaturase-like	1286	370	644	475.87	232.98	218.72	145	21.29	30.01	27.15	12.64	10.97	8.76	26.15	10.79	0.372748	-1.42373	2.49e-08	1.24e-06	yes	down	XP_027839986.1(acyl-CoA Delta(11) desaturase-like [Aphis gossypii])	GO:0006633(biological_process:fatty acid biosynthetic process); GO:0016717(molecular_function:oxidoreductase activity, acting on paired donors, with oxidation of a pair of donors resulting in the reduction of molecular oxygen to two molecules of water); GO:0016021(cellular_component:integral component of membrane)	K00507	SCD, desC	map04152(AMPK signaling pathway); map01040(Biosynthesis of unsaturated fatty acids); map03320(PPAR signaling pathway); map04212(Longevity regulating pathway - worm)	COG1398(I:Lipid transport and metabolism)	COG1398(desaturase)	PF00487.25(FA_desaturase:Fatty acid desaturase)	sp|O44390|ACO11_TRINI(Acyl-CoA Delta(11) desaturase OS=Trichoplusia ni OX=7111 GN=D11DS PE=1 SV=2)	114121736
LOC114131723	asparagine-rich protein, transcript variant X1	1957	143	285	211	553	703	322	3.89	7.29	6.75	14.9	20.24	9.74	5.97667	14.96	2.30393	1.2041	0.000125083	0.0024811	yes	up	XP_027852819.1(asparagine-rich protein isoform X1 [Aphis gossypii])	0	0	0	0	ENOG410XQKW(J:Translation, ribosomal structure and biogenesis)	ENOG410XQKW(CBP80 20-dependent translation initiation factor)	0	sp|B0UXU6|M4GDA_DANRE(MIF4G domain-containing protein A OS=Danio rerio OX=7955 GN=mif4gda PE=2 SV=1)	114131723
LOC114133133	TBC1 domain family member 19	2426	358	479	328	26	16	23	8.39	9.87	8.41	0.57	0.37	0.55	8.89	0.496667	0.0511286	-4.28973	1.88e-55	3.08e-52	yes	down	XP_027854578.1(TBC1 domain family member 19 [Aphis gossypii])	0	0	0	0	ENOG410XRPM(S:Function unknown)	ENOG410XRPM(TBC1 domain family, member 19)	PF00566.19(RabGAP-TBC:Rab-GTPase-TBC domain)	sp|Q8N5T2|TBC19_HUMAN(TBC1 domain family member 19 OS=Homo sapiens OX=9606 GN=TBC1D19 PE=1 SV=2)	114133133
LOC114132470	cuticle protein 7-like	1183	495	304	338	152	97	245	22.56	11.49	16.16	6.52	4.39	11.01	16.7367	7.30667	0.384557	-1.37873	5.02e-05	0.00114197	yes	down	XP_027853734.1(cuticle protein 7-like [Aphis gossypii])	GO:0042302(molecular_function:structural constituent of cuticle)	0	0	0	ENOG410YXZN(S:Function unknown); ENOG410YXTN(S:Function unknown)	ENOG410YXZN(Cuticular protein); ENOG410YXTN(Cuticular protein)	PF00379.24(Chitin_bind_4:Insect cuticle protein)	sp|P11734|CU08_LOCMI(Cuticle protein 8 OS=Locusta migratoria OX=7004 PE=1 SV=1)	114132470
LOC114121316	uncharacterized LOC114121316	437	97	91	96	53	51	45	29.65	23.47	31.65	14.43	15.34	14.78	28.2567	14.85	0.476348	-1.06991	0.000157038	0.00302087	yes	down	XP_027839384.1(uncharacterized protein LOC114121316 [Aphis gossypii])	0	0	0	0	0	0	0	0	114121316
LOC114119959	beta-galactosidase-like	2323	537	621.76	547.11	322	304	186.54	12.58	12.78	14.42	7.06	7.1	4.46	13.26	6.20667	0.438657	-1.18883	1.19e-06	4.14e-05	yes	down	XP_027837509.1(beta-galactosidase-like [Aphis gossypii])	GO:0005975(biological_process:carbohydrate metabolic process); GO:0016021(cellular_component:integral component of membrane); GO:0004565(molecular_function:beta-galactosidase activity)	K12309	GLB1, ELNR1	map00600(Sphingolipid metabolism); map00604(Glycosphingolipid biosynthesis - ganglio series); map00052(Galactose metabolism); map00511(Other glycan degradation); map00531(Glycosaminoglycan degradation); map04142(Lysosome)	COG1874(G:Carbohydrate transport and metabolism)	COG1874(beta-galactosidase)	PF01301.20(Glyco_hydro_35:Glycosyl hydrolases family 35); PF02449.16(Glyco_hydro_42:Beta-galactosidase); PF13364.7(BetaGal_dom4_5:Beta-galactosidase jelly roll domain)	sp|O19015|BGAL_FELCA(Beta-galactosidase OS=Felis catus OX=9685 GN=GLB1 PE=2 SV=1)	114119959
LOC114128187	maltase A3-like	1093	168.18	158.36	220.82	16.79	8	41.21	6.15	5.32	9.27	0.57	0.29	1.67	6.91333	0.843333	0.107272	-3.22065	2.48e-13	2.37e-11	yes	down	KAE9521750.1(hypothetical protein AGLY_017850 [Aphis glycines])	GO:0003824(molecular_function:catalytic activity); GO:0005975(biological_process:carbohydrate metabolic process)	K01187	malZ	map00500(Starch and sucrose metabolism); map00052(Galactose metabolism)	COG0366(G:Carbohydrate transport and metabolism)	COG0366(alpha amylase, catalytic)	PF00128.25(Alpha-amylase:Alpha amylase, catalytic domain)	sp|P07190|MAL1_DROME(Maltase A1 OS=Drosophila melanogaster OX=7227 GN=Mal-A1 PE=2 SV=2)	114128187
LOC114122150	uncharacterized LOC114122150	771	37	38	30	4	6	14.13	2.91	2.07	1.59	0.13	0.49	0.95	2.19	0.523333	0.204545	-2.28951	3.85e-05	0.000909058	yes	down	0	0	0	0	0	0	0	0	0	114122150
LOC114123886	uncharacterized LOC114123886	547	79.76	60.61	36.57	23.72	26.91	8.41	15.76	9.93	7.61	4.36	5.24	1.69	11.1	3.76333	0.302747	-1.72381	0.00107255	0.0149052	yes	down	XP_027842823.1(uncharacterized protein LOC114123886 [Aphis gossypii])	GO:0005576(cellular_component:extracellular region); GO:0006629(biological_process:lipid metabolic process); GO:0052689(molecular_function:carboxylic ester hydrolase activity)	0	0	0	ENOG410YGS3(S:Function unknown)	ENOG410YGS3(pancreatic triacylglycerol lipase)	PF00151.20(Lipase:Lipase)	0	114123886
LOC114132773	uncharacterized LOC114132773	1798	0	2	1	10	15	9	0	0.06	0.04	0.31	0.5	0.31	0.0333333	0.373333	10.5209	3.39519	0.00376809	0.0407174	yes	up	XP_027854145.1(uncharacterized protein LOC114132773 [Aphis gossypii])	0	0	0	0	0	0	0	0	114132773
LOC114129613	UDP-glucuronosyltransferase 2C1-like	1881	511.43	691	503.73	0	1.5	1	16.1	19.07	17.32	0	0.05	0.03	17.4967	0.0266667	0.00160599	-9.28232	1.45e-27	4.51e-25	yes	down	XP_027850212.1(UDP-glucuronosyltransferase 2C1-like [Aphis gossypii])	GO:0015020(molecular_function:glucuronosyltransferase activity); GO:0016021(cellular_component:integral component of membrane)	K00699	UGT	map05204(Chemical carcinogenesis); map00983(Drug metabolism - other enzymes); map00982(Drug metabolism - cytochrome P450); map00980(Metabolism of xenobiotics by cytochrome P450); map00040(Pentose and glucuronate interconversions); map00860(Porphyrin and chlorophyll metabolism); map00053(Ascorbate and aldarate metabolism); map00830(Retinol metabolism); map00140(Steroid hormone biosynthesis)	COG1819(S:Function unknown)	COG1819(Transferase)	PF00201.19(UDPGT:UDP-glucoronosyl and UDP-glucosyl transferase); PF04101.17(Glyco_tran_28_C:Glycosyltransferase family 28 C-terminal domain)	sp|P54855|UDB15_HUMAN(UDP-glucuronosyltransferase 2B15 OS=Homo sapiens OX=9606 GN=UGT2B15 PE=1 SV=3)	114129613
LOC114122941	uncharacterized LOC114122941	835	176	178.7	146.28	78.92	93.65	77.62	13.03	10.99	11.16	5.16	6.95	5.69	11.7267	5.93333	0.455064	-1.13586	1.14e-06	3.96e-05	yes	down	XP_027841550.1(uncharacterized protein LOC114122941 [Aphis gossypii])	0	0	0	0	COG1437(F:Nucleotide transport and metabolism)	COG1437(Adenylate cyclase)	PF01928.22(CYTH:CYTH domain)	0	114122941
LOC114126299	uncharacterized LOC114126299	2142	491	712	244	1057	1262	2142	19.83	23.92	9.62	67	81.13	147.22	17.79	98.45	2.80204	1.48648	5.76e-06	0.000173621	yes	up	XP_027846017.1(uncharacterized protein LOC114126299, partial [Aphis gossypii])	GO:0016021(cellular_component:integral component of membrane); GO:0007165(biological_process:signal transduction)	0	0	0	ENOG410ZEDS(S:Function unknown)	ENOG410ZEDS(-)	0	0	114126299
LOC114125762	uncharacterized LOC114125762	619	463	601	422	282	279	208	42.17	53.74	44.61	25.8	26.42	19.14	46.84	23.7867	0.476385	-1.0698	4.07e-07	1.56e-05	yes	down	XP_027845335.1(uncharacterized protein LOC114125762 [Aphis gossypii])	0	0	0	0	0	0	0	0	114125762
LOC114123187	cytochrome P450 6g1-like	1004	2145.96	3911.85	2018.45	722.7	598.98	678.02	151.08	238.22	153.91	47.82	41.92	48.66	181.07	46.1333	0.230102	-2.11966	2.07e-21	4.24e-19	yes	down	XP_027841883.1(cytochrome P450 6g1-like [Aphis gossypii])	GO:0005506(molecular_function:iron ion binding); GO:0016705(molecular_function:oxidoreductase activity, acting on paired donors, with incorporation or reduction of molecular oxygen); GO:0016021(cellular_component:integral component of membrane); GO:0004497(molecular_function:monooxygenase activity); GO:0020037(molecular_function:heme binding)	K14999	CYP6	0	COG2124(Q:Secondary metabolites biosynthesis, transport and catabolism)	COG2124(Cytochrome p450)	PF00067.23(p450:Cytochrome P450)	sp|Q9V674|CP6G1_DROME(Cytochrome P450 6g1 OS=Drosophila melanogaster OX=7227 GN=Cyp6g1 PE=2 SV=1)	114123187
LOC114127468	uncharacterized LOC114127468	786	177	167	153	105	78	67	17.99	14.53	16.73	10	7.87	6.93	16.4167	8.26667	0.459679	-1.1213	5.43e-05	0.00121907	yes	down	XP_027847509.1(uncharacterized protein LOC114127468 [Aphis gossypii])	0	0	0	0	0	0	0	0	114127468
LOC114122217	transcriptional regulatory protein AlgP-like	1618	20011	28717	28213	15830	11619	12293	755.1	947.89	1161.53	562.99	436.78	473.38	954.84	491.05	0.476185	-1.07041	3.58e-08	1.75e-06	yes	down	KAE9523627.1(hypothetical protein AGLY_016179 [Aphis glycines])	0	0	0	0	0	0	0	0	114122217
LOC114132976	transcription initiation factor TFIID subunit 4-like	2531	2.41	0	1.81	23.18	12.52	10.95	0.05	0	0.04	0.49	0.28	0.25	0.03	0.34	10.6716	3.41571	0.00108518	0.0150507	yes	up	XP_027854387.1(transcription initiation factor TFIID subunit 4-like, partial [Aphis gossypii])	GO:0005669(cellular_component:transcription factor TFIID complex); GO:0006355(biological_process:regulation of transcription, DNA-templated); GO:0046982(molecular_function:protein heterodimerization activity); GO:0006352(biological_process:DNA-templated transcription, initiation); GO:0003743(molecular_function:translation initiation factor activity)	K03129	TAF4	map03022(Basal transcription factors); map05016(Huntington disease)	ENOG410XQS6(K:Transcription)	ENOG410XQS6(RNA polymerase II, TATA box binding protein (TBP)-associated factor)	PF05236.15(TAF4:Transcription initiation factor TFIID component TAF4 family); PF07531.15(TAFH:NHR1 homology to TAF)	sp|P47825|TAF4_DROME(Transcription initiation factor TFIID subunit 4 OS=Drosophila melanogaster OX=7227 GN=Taf4 PE=1 SV=1)	114132976
LOC114120537	uncharacterized LOC114120537	2070	38	38	23	64	68	109	1.07	0.94	0.71	1.7	1.91	3.13	0.906667	2.24667	2.19232	1.13246	0.00168432	0.0215042	yes	up	XP_027838276.1(uncharacterized protein LOC114120537 [Aphis gossypii])	0	0	0	0	0	0	0	0	114120537
LOC114120705	uncharacterized LOC114120705	1439	2372	2591	1811	1339	1308	904	103.51	98.7	86.11	55.04	56.84	40.25	96.1067	50.71	0.481407	-1.05467	1.98e-06	6.58e-05	yes	down	XP_027838502.1(uncharacterized protein LOC114120705 [Aphis gossypii])	GO:0016021(cellular_component:integral component of membrane)	0	0	0	ENOG4111U4E(S:Function unknown)	ENOG4111U4E(-)	0	0	114120705
LOC114129129	FK506-binding protein 5-like	1450	123.05	154.04	120.79	5.07	13.21	21.35	5.32	5.81	5.69	0.21	0.57	0.94	5.60667	0.573333	0.088297	-3.50149	8.79e-20	1.71e-17	yes	down	XP_027849565.1(FK506-binding protein 5-like [Aphis gossypii])	0	K17478	FKBP15, WAFL	0	ENOG410ZIE4(S:Function unknown); COG0545(S:Function unknown)	ENOG410ZIE4(-); COG0545(-)	0	0	114129129
LOC114126223	probable chitinase 10	7123	1082	739	1228	596	314	308	7.91	4.78	9.86	4.12	2.29	2.3	7.51667	2.90333	0.364014	-1.45793	8.95e-06	0.000253537	yes	down	XP_027845919.1(LOW QUALITY PROTEIN: probable chitinase 10 [Aphis gossypii])	GO:0005576(cellular_component:extracellular region); GO:0005975(biological_process:carbohydrate metabolic process); GO:0008061(molecular_function:chitin binding); GO:0004553(molecular_function:hydrolase activity, hydrolyzing O-glycosyl compounds)	K01183	E3.2.1.14	map00520(Amino sugar and nucleotide sugar metabolism)	COG3325(S:Function unknown)	COG3325(-)	PF00704.29(Glyco_hydro_18:Glycosyl hydrolases family 18); PF01607.25(CBM_14:Chitin binding Peritrophin-A domain)	sp|Q9W5U2|CHI10_DROME(Probable chitinase 10 OS=Drosophila melanogaster OX=7227 GN=Cht10 PE=2 SV=2)	114126223
LOC114131747	fatty acyl-CoA reductase wat-like	2667	77	54	41	20	26	28	1.62	1	0.95	0.4	0.55	0.6	1.19	0.516667	0.385002	-1.37706	0.000775281	0.011381	yes	down	XP_027852849.1(fatty acyl-CoA reductase wat-like [Aphis gossypii])	GO:0102965(molecular_function:alcohol-forming fatty acyl-CoA reductase activity); GO:0016021(cellular_component:integral component of membrane); GO:0080019(molecular_function:fatty-acyl-CoA reductase (alcohol-forming) activity); GO:0006629(biological_process:lipid metabolic process)	K13356	FAR	map04146(Peroxisome); map04212(Longevity regulating pathway - worm)	ENOG410XS7R(S:Function unknown)	ENOG410XS7R(phd finger)	PF07993.13(NAD_binding_4:Male sterility protein); PF03015.20(Sterile:Male sterility protein); PF01073.20(3Beta_HSD:3-beta hydroxysteroid dehydrogenase/isomerase family); PF02719.16(Polysacc_synt_2:Polysaccharide biosynthesis protein); PF01370.22(Epimerase:NAD dependent epimerase/dehydratase family)	sp|Q8MS59|WAT_DROME(Fatty acyl-CoA reductase wat OS=Drosophila melanogaster OX=7227 GN=wat PE=1 SV=1)	114131747
LOC114125595	acetyl-coenzyme A transporter 1-like, transcript variant X2	1778	3	1	4	306	324	291	0.1	0.03	0.14	9.65	10.82	9.67	0.09	10.0467	104.819	6.71176	8.55e-34	3.77e-31	yes	up	XP_027845117.1(acetyl-coenzyme A transporter 1-like [Aphis gossypii])	GO:0008521(molecular_function:acetyl-CoA transporter activity); GO:0016021(cellular_component:integral component of membrane)	K03372	ACATN, SLC33A1	map00604(Glycosphingolipid biosynthesis - ganglio series)	COG0477(I:Lipid transport and metabolism)	COG0477(Carboxylesterase)	PF13000.8(Acatn:Acetyl-coenzyme A transporter 1)	sp|O00400|ACATN_HUMAN(Acetyl-coenzyme A transporter 1 OS=Homo sapiens OX=9606 GN=SLC33A1 PE=1 SV=1)	114125595
LOC114123629	WD repeat-containing protein 54-like, transcript variant X2	1730	30	30	26	57	82	83	1.05	0.93	1	1.87	2.9	2.99	0.993333	2.58667	2.33093	1.2209	0.000229586	0.00415739	yes	up	KAE9544972.1(hypothetical protein AGLY_000515 [Aphis glycines])	0	0	0	0	ENOG410XS69(S:Function unknown)	ENOG410XS69(WD repeat domain 54)	PF00400.33(WD40:WD domain, G-beta repeat)	sp|Q9R0D8|WDR54_MOUSE(WD repeat-containing protein 54 OS=Mus musculus OX=10090 GN=Wdr54 PE=1 SV=1)	114123629
LOC114120773	BCL-6 corepressor-like protein 1	1992	74013.7	90982.7	75267.3	22550.1	32850.2	26491.7	2098.6	2298.58	2324.69	608.13	938.36	785.56	2240.62	777.35	0.310082	-1.68928	6.16e-29	2.14e-26	yes	down	XP_027838598.1(BCL-6 corepressor-like protein 1 [Aphis gossypii])	0	0	0	0	ENOG4111M7J(S:Function unknown); ENOG410Y20T(S:Function unknown)	ENOG4111M7J(Cuticular protein); ENOG410Y20T(-)	0	0	114120773
LOC114127697	UDP-glucuronosyltransferase 2B2-like, transcript variant X1	1677	811.65	859.06	833.8	223.93	313.5	224.17	22.19	20.99	24.82	5.99	8.69	6.07	22.6667	6.91667	0.276133	-1.85656	1.69e-23	4.05e-21	yes	down	XP_027847822.1(UDP-glucuronosyltransferase 2B2-like isoform X1 [Aphis gossypii])	GO:0015020(molecular_function:glucuronosyltransferase activity); GO:0016021(cellular_component:integral component of membrane)	K00699	UGT	map05204(Chemical carcinogenesis); map00983(Drug metabolism - other enzymes); map00982(Drug metabolism - cytochrome P450); map00980(Metabolism of xenobiotics by cytochrome P450); map00040(Pentose and glucuronate interconversions); map00860(Porphyrin and chlorophyll metabolism); map00053(Ascorbate and aldarate metabolism); map00830(Retinol metabolism); map00140(Steroid hormone biosynthesis)	COG1819(S:Function unknown)	COG1819(Transferase)	PF00201.19(UDPGT:UDP-glucoronosyl and UDP-glucosyl transferase); PF04101.17(Glyco_tran_28_C:Glycosyltransferase family 28 C-terminal domain)	sp|P08541|UD2B2_RAT(UDP-glucuronosyltransferase 2B2 OS=Rattus norvegicus OX=10116 GN=Ugt2b PE=1 SV=1)	114127697
LOC114127729	tubulin polyglutamylase TTLL4-like	1572	44	78	35	13	5	7	1.72	2.67	1.49	0.48	0.19	0.28	1.96	0.316667	0.148699	-2.74953	3.29e-07	1.29e-05	yes	down	XP_027847851.1(tubulin polyglutamylase TTLL4-like [Aphis gossypii])	GO:0018095(biological_process:protein polyglutamylation); GO:0005524(molecular_function:ATP binding)	K16601	TTLL4	0	ENOG410XTI2(S:Function unknown)	ENOG410XTI2(tubulin tyrosine ligase-like family, member 4)	PF03133.16(TTL:Tubulin-tyrosine ligase family); PF14398.7(ATPgrasp_YheCD:YheC/D like ATP-grasp)	sp|Q14679|TTLL4_HUMAN(Tubulin polyglutamylase TTLL4 OS=Homo sapiens OX=9606 GN=TTLL4 PE=1 SV=2)	114127729
LOC114129939	discoidin domain-containing receptor 2-like	1086	72.41	59	57	223.18	192.38	211.34	2.63	3.23	3.9	4.16	3.1	6.62	3.25333	4.62667	3.01768	1.59344	1.61e-10	1.13e-08	yes	up	XP_027850613.1(discoidin domain-containing receptor 2-like [Aphis gossypii])	GO:0043235(cellular_component:receptor complex); GO:0033674(biological_process:positive regulation of kinase activity); GO:0038062(molecular_function:protein tyrosine kinase collagen receptor activity); GO:0016021(cellular_component:integral component of membrane); GO:0004714(molecular_function:transmembrane receptor protein tyrosine kinase activity); GO:0004713(molecular_function:protein tyrosin…	K05125	DDR2, TKT, CD167b	0	ENOG410XQAI(K:Transcription); ENOG410YRS7(U:Intracellular trafficking, secretion, and vesicular transport)	ENOG410XQAI(menage a trois homolog 1, cyclin H assembly factor (Xenopus laevis)); ENOG410YRS7(-)	PF00754.26(F5_F8_type_C:F5/8 type C domain)	sp|Q16832|DDR2_HUMAN(Discoidin domain-containing receptor 2 OS=Homo sapiens OX=9606 GN=DDR2 PE=1 SV=2)	114129939
LOC114127375	40S ribosomal protein S20-like	570	7539.82	7819.61	6576.33	22.15	0	157.89	1366.52	1181.35	1259.71	3.74	0	29.05	1269.19	10.93	0.00710564	-7.13682	3.92e-05	0.000920731	yes	down	XP_027847395.1(40S ribosomal protein S20-like [Aphis gossypii])	GO:0003735(molecular_function:structural constituent of ribosome); GO:0003723(molecular_function:RNA binding); GO:0006412(biological_process:translation); GO:0015935(cellular_component:small ribosomal subunit)	K02969	RP-S20e, RPS20	map03010(Ribosome)	COG0051(J:Translation, ribosomal structure and biogenesis)	COG0051(tRNA binding)	PF00338.23(Ribosomal_S10:Ribosomal protein S10p/S20e)	sp|P23403|RS20_XENLA(40S ribosomal protein S20 OS=Xenopus laevis OX=8355 GN=rps20 PE=1 SV=1)	114127375
LOC114123642	uncharacterized LOC114123642	273	0	0	0	30.65	56.43	30.76	0	0	0	80.19	154.85	92.62	0	109.22	194.197	7.60138	4.67e-09	2.58e-07	yes	up	0	0	0	0	0	0	0	0	0	114123642
LOC114130129	uncharacterized LOC114130129	777	190.88	216.98	200.44	35.22	57.28	51.32	5.81	6.06	6.45	3.03	5.09	3.98	6.10667	4.03333	0.212959	-2.23135	3.78e-20	7.48e-18	yes	down	XP_027850828.1(uncharacterized protein LOC114130129 [Aphis gossypii])	GO:0061640(biological_process:cytoskeleton-dependent cytokinesis); GO:0005869(cellular_component:dynactin complex)	K10425	DCTN3	map05016(Huntington disease)	0	0	PF07426.12(Dynactin_p22:Dynactin subunit p22)	0	114130129
LOC114132874	translocator protein	773	559	704	570	267	272	287	58.37	62.85	63.97	26.12	28.17	30.51	61.73	28.2667	0.411102	-1.28243	2.91e-19	5.39e-17	yes	down	XP_027854273.1(translocator protein [Aphis gossypii])	GO:0016021(cellular_component:integral component of membrane)	K05770	TSPO, BZRP	map05166(Human T-cell leukemia virus 1 infection); map04080(Neuroactive ligand-receptor interaction); map04979(Cholesterol metabolism); map04214(Apoptosis - fly)	COG3476(T:Signal transduction mechanisms)	COG3476(tspo and mbr like protein)	PF03073.16(TspO_MBR:TspO/MBR family)	sp|P30536|TSPO_HUMAN(Translocator protein OS=Homo sapiens OX=9606 GN=TSPO PE=1 SV=3)	114132874
LOC114121388	uncharacterized LOC114121388	1179	14	27	27	0	1	6	0.79	1.33	1.66	0	0.06	0.35	1.26	0.136667	0.0923179	-3.43725	0.000111591	0.00224849	yes	down	XP_027839496.1(uncharacterized protein LOC114121388 [Aphis gossypii])	0	0	0	0	ENOG410Z9TD(S:Function unknown); ENOG410Y7Q4(S:Function unknown); COG2801(S:Function unknown); ENOG410Z1QR(L:Replication, recombination and repair)	ENOG410Z9TD(Protein of unknown function (DUF1759)); ENOG410Y7Q4(-); COG2801(-); ENOG410Z1QR(Retrotransposon protein)	PF05585.13(DUF1758:Putative peptidase (DUF1758)); PF13650.7(Asp_protease_2:Aspartyl protease)	0	114121388
LOC114125040	uncharacterized LOC114125040	915	15	25	31	0	0	0	1.21	1.73	2.7	0	0	0	1.88	0	0.0071083	-7.13628	1e-07	4.42e-06	yes	down	XP_027844316.1(uncharacterized protein LOC114125040 [Aphis gossypii])	0	0	0	0	0	0	0	0	114125040
LOC114125382	uncharacterized LOC114125382	1007	672	1322	889	437	390	466	47.11	80.17	67.51	28.79	27.18	33.3	64.93	29.7567	0.414951	-1.26899	9.37e-10	5.84e-08	yes	down	XP_027844800.1(uncharacterized protein LOC114125382 [Aphis gossypii])	0	0	0	0	ENOG410XRSQ(O:Posttranslational modification, protein turnover, chaperones)	ENOG410XRSQ(Meprin A)	PF00650.21(CRAL_TRIO:CRAL/TRIO domain)	0	114125382
LOC114130731	uncharacterized LOC114130731	2426	4	3	1	22	13	13	0.09	0.06	0.03	0.49	0.3	0.31	0.06	0.366667	5.50511	2.46077	0.00390654	0.0416971	yes	up	VVC41519.1(Protein of unknown function DUF4769 [Cinara cedri])	0	0	0	0	ENOG410YTVD(S:Function unknown)	ENOG410YTVD(-)	0	0	114130731
LOC114132520	clumping factor A-like, transcript variant X1	2566	13	20	9	42	48	48	0.28	0.37	0.21	0.87	1.05	1.08	0.286667	1	3.0106	1.59005	0.000282607	0.00487966	yes	up	XP_027853795.1(uncharacterized protein LOC114132520 [Aphis gossypii])	0	K23573	DSPP	map04512(ECM-receptor interaction)	0	0	0	0	114132520
LOC114119291	uncharacterized LOC114119291	1001	9	14	13	0	0	0	0.64	0.86	1	0	0	0	0.833333	0	0.0140392	-6.15439	2.08e-05	0.000524297	yes	down	XP_027836598.1(uncharacterized protein LOC114119291 [Aphis gossypii])	0	0	0	0	0	0	0	0	114119291
LOC114126666	extensin-2-like	3958	493	516	640	308	184	165	6.93	6.41	9.86	4.02	2.54	2.34	7.73333	2.96667	0.366555	-1.4479	4.42e-07	1.68e-05	yes	down	XP_027846467.1(extensin-2-like [Aphis gossypii])	0	0	0	0	ENOG410ZQNU(S:Function unknown)	ENOG410ZQNU(-)	PF16058.6(Mucin-like:Mucin-like)	0	114126666
LOC114121652	uncharacterized LOC114121652	611	155.08	139.69	87.89	252.87	335.11	297.52	24.48	18.52	14.74	37.23	52.28	47.71	19.2467	45.74	2.0905	1.06385	3.12e-05	0.000755429	yes	up	XP_027839875.1(unconventional myosin-Va-like isoform X2 [Aphis gossypii])	0	K16677	DACHS	map04391(Hippo signaling pathway - fly)	COG5022(Z:Cytoskeleton)	COG5022(myosin heavy chain)	0	0	114121652
LOC114121573	cuticle protein 7-like	611	8850	10400	9099	3559	2450	1712	1396.84	1378.66	1525.69	524.01	382.23	274.55	1433.73	393.597	0.252459	-1.98588	6.1e-14	6.25e-12	yes	down	XP_027839787.1(cuticle protein 7-like [Aphis gossypii])	GO:0016021(cellular_component:integral component of membrane); GO:0042302(molecular_function:structural constituent of cuticle)	0	0	0	ENOG41125JG(S:Function unknown); ENOG4112DDP(S:Function unknown)	ENOG41125JG(structural constituent of chitin-based cuticle); ENOG4112DDP(Cuticular protein)	PF00379.24(Chitin_bind_4:Insect cuticle protein)	0	114121573
LOC114124991	regulator of nonsense transcripts 1-like	1208	712	1483	471	1660	2048	2461	38.93	70.51	27.99	85.42	111.43	137.23	45.81	111.36	2.14507	1.10102	0.000340848	0.00572034	yes	up	XP_027844260.1(regulator of nonsense transcripts 1-like [Aphis gossypii])	0	0	0	0	0	0	0	0	114124991
LOC114127227	arrestin domain-containing protein 3-like	1774	216	333	337	95	148	197	7.66	10.32	13.3	3.15	5.23	7.12	10.4267	5.16667	0.448865	-1.15565	1.16e-05	0.000322099	yes	down	XP_027847220.1(arrestin domain-containing protein 3-like [Aphis gossypii])	0	0	0	0	ENOG41102NY(S:Function unknown)	ENOG41102NY(Arrestin domain containing)	PF00339.30(Arrestin_N:Arrestin (or S-antigen), N-terminal domain); PF02752.23(Arrestin_C:Arrestin (or S-antigen), C-terminal domain)	sp|Q7TPQ9|ARRD3_MOUSE(Arrestin domain-containing protein 3 OS=Mus musculus OX=10090 GN=Arrdc3 PE=2 SV=1)	114127227
LOC114127401	E3 SUMO-protein ligase KIAA1586-like	2250	18	15	17	0	0	0	0.46	0.34	0.47	0	0	0	0.423333	0	0.00995623	-6.65019	1.34e-06	4.6e-05	yes	down	XP_027847427.1(E3 SUMO-protein ligase KIAA1586-like [Aphis gossypii])	0	0	0	0	ENOG410ZI9G(S:Function unknown); COG5048(S:Function unknown)	ENOG410ZI9G(-); COG5048(-)	PF14291.7(DUF4371:Domain of unknown function (DUF4371)); PF04937.16(DUF659:Protein of unknown function (DUF 659))	sp|Q9HCI6|K1586_HUMAN(E3 SUMO-protein ligase KIAA1586 OS=Homo sapiens OX=9606 GN=KIAA1586 PE=1 SV=2)	114127401
LOC114125939	fatty acyl-CoA reductase wat-like	1589	22	10	15	69	113	94	0.85	0.34	0.63	2.51	4.34	3.7	0.606667	3.51667	5.23349	2.38777	9.43e-09	4.98e-07	yes	up	XP_027845565.1(fatty acyl-CoA reductase wat-like [Aphis gossypii])	GO:0102965(molecular_function:alcohol-forming fatty acyl-CoA reductase activity); GO:0016021(cellular_component:integral component of membrane); GO:0080019(molecular_function:fatty-acyl-CoA reductase (alcohol-forming) activity); GO:0006629(biological_process:lipid metabolic process)	K13356	FAR	map04146(Peroxisome); map04212(Longevity regulating pathway - worm)	ENOG410XS7R(S:Function unknown)	ENOG410XS7R(fatty-acyl-CoA reductase (alcohol-forming) activity)	PF07993.13(NAD_binding_4:Male sterility protein); PF03015.20(Sterile:Male sterility protein); PF01370.22(Epimerase:NAD dependent epimerase/dehydratase family); PF01073.20(3Beta_HSD:3-beta hydroxysteroid dehydrogenase/isomerase family); PF16363.6(GDP_Man_Dehyd:GDP-mannose 4,6 dehydratase); PF02719.16(Polysacc_synt_2:Polysaccharide biosynthesis protein)	sp|Q8MS59|WAT_DROME(Fatty acyl-CoA reductase wat OS=Drosophila melanogaster OX=7227 GN=wat PE=1 SV=1)	114125939
LOC114130202	uncharacterized LOC114130202, transcript variant X2	1914	703	628	706	393	429	219	19.29	15.67	21.64	10.7	12.43	6.58	18.8667	9.90333	0.466502	-1.10004	6.84e-05	0.00148295	yes	down	XP_027850922.1(uncharacterized protein LOC114130202 isoform X2 [Aphis gossypii])	GO:0042302(molecular_function:structural constituent of cuticle)	0	0	0	ENOG4111IH8(S:Function unknown)	ENOG4111IH8(Insect cuticle protein)	PF00379.24(Chitin_bind_4:Insect cuticle protein)	0	114130202
LOC114129664	trypsin-1-like	1503	1538.55	948.28	1687.91	992.17	539.38	555.46	62.01	35.06	76.34	46.8	26.37	24.69	57.8033	32.62	0.453359	-1.14127	0.000454931	0.00724414	yes	down	XP_027850262.1(trypsin-1-like [Aphis gossypii])	GO:0004252(molecular_function:serine-type endopeptidase activity)	0	0	0	COG5640(O:Posttranslational modification, protein turnover, chaperones)	COG5640(protease)	PF00089.27(Trypsin:Trypsin); PF13365.7(Trypsin_2:Trypsin-like peptidase domain)	sp|P03952|KLKB1_HUMAN(Plasma kallikrein OS=Homo sapiens OX=9606 GN=KLKB1 PE=1 SV=1)	114129664
LOC114126422	heat shock protein 70 B2-like	2808	2385	2765	2254	1333	1372	1287	41.93	41.42	43.35	22.25	24.5	22.57	42.2333	23.1067	0.491986	-1.02331	3.6e-15	4.25e-13	yes	down	XP_027846164.1(heat shock protein 70 B2-like [Aphis gossypii])	GO:0005524(molecular_function:ATP binding)	btab;K03283	;HSPA1s	map05162(Measles); map05145(Toxoplasmosis); map04010(MAPK signaling pathway); map03040(Spliceosome); map05134(Legionellosis); map04612(Antigen processing and presentation); map04213(Longevity regulating pathway - multiple species); map04144(Endocytosis); map04915(Estrogen signaling pathway); map04141(Protein processing in endoplasmic reticulum)	COG0443(G:Carbohydrate transport and metabolism)	COG0443(pancreatic)	PF00012.21(HSP70:Hsp70 protein); PF06723.14(MreB_Mbl:MreB/Mbl protein)	sp|P41827|HSP74_ANOAL(Heat shock protein 70 B2 OS=Anopheles albimanus OX=7167 GN=HSP70B2 PE=3 SV=1)	114126422
LOC114124123	serine protease lint-like	2085	0	2.46	6.01	32.41	16.48	21.38	0	0.06	0.18	0.85	0.46	0.61	0.08	0.64	7.97182	2.99491	0.000639789	0.00961361	yes	up	XP_027843109.1(serine protease lint-like [Aphis gossypii])	GO:0004252(molecular_function:serine-type endopeptidase activity)	0	0	0	COG5640(S:Function unknown)	COG5640(PAN domain)	0	sp|B7YZU2|LINT_DROME(Serine protease filzig OS=Drosophila melanogaster OX=7227 GN=flz PE=2 SV=1)	114124123
LOC114125196	uncharacterized LOC114125196	1208	3	3	5	52	61	49	0.21	0.18	0.38	3.31	3.8	3.39	0.256667	3.5	13.4059	3.7448	1.45e-10	1.02e-08	yes	up	XP_027844539.1(LOW QUALITY PROTEIN: uncharacterized protein LOC114125196 [Aphis gossypii])	0	0	0	0	ENOG410YTVD(S:Function unknown)	ENOG410YTVD(Conserved hypothetical, protein)	0	0	114125196
LOC114123364	uncharacterized LOC114123364	867	165	150	243	100	120	79	14.4	11.26	22.88	8.19	10.4	7.02	16.18	8.53667	0.485497	-1.04247	0.0005047	0.00787264	yes	down	XP_026812042.1(uncharacterized protein LOC113553094 [Rhopalosiphum maidis])	0	0	0	0	0	0	0	0	114123364
LOC114132056	heat shock protein 70 A1-like	2221	249	248	303	93	189	93	6.45	5.65	8.59	2.27	4.88	2.46	6.89667	3.20333	0.423952	-1.23803	5.51e-05	0.00122597	yes	down	XP_027853233.1(heat shock protein 70 A1-like [Aphis gossypii])	GO:0005524(molecular_function:ATP binding)	K03283	HSPA1s	map05162(Measles); map05145(Toxoplasmosis); map04010(MAPK signaling pathway); map03040(Spliceosome); map05134(Legionellosis); map04612(Antigen processing and presentation); map04213(Longevity regulating pathway - multiple species); map04144(Endocytosis); map04915(Estrogen signaling pathway); map04141(Protein processing in endoplasmic reticulum)	COG0443(O:Posttranslational modification, protein turnover, chaperones)	COG0443(Heat shock protein)	PF00012.21(HSP70:Hsp70 protein); PF06723.14(MreB_Mbl:MreB/Mbl protein)	sp|P41825|HSP71_ANOAL(Heat shock protein 70 A1 OS=Anopheles albimanus OX=7167 GN=HSP70A1 PE=3 SV=1)	114132056
LOC114121995		2433	20	29	17	89	89	68	1.14	0.6	0.43	1.96	2.07	1.62	0.723333	1.88333	3.43326	1.77958	9.38e-07	3.33e-05	yes	up	KAE9544774.1(hypothetical protein AGLY_000316 [Aphis glycines])	0	K10443	KLHL2_3	0	ENOG410XNX8(S:Function unknown); COG2801(L:Replication, recombination and repair)	ENOG410XNX8(kelch-like); COG2801(Retrotransposon protein)	0	sp|Q70JS2|KELC_ANOST(Ring canal kelch homolog OS=Anopheles stephensi OX=30069 GN=kel PE=2 SV=2)	114121995
LOC114128481	uncharacterized LOC114128481	591	14	16	12	47	51	56	0.64	0.84	1.2	2.24	3.49	5.05	0.893333	3.59333	3.33289	1.73677	1.79e-05	0.000463037	yes	up	XP_027848800.1(uncharacterized protein LOC114128481 [Aphis gossypii])	0	0	0	0	ENOG411206Y(S:Function unknown)	ENOG411206Y(transposon protein)	PF13359.7(DDE_Tnp_4:DDE superfamily endonuclease)	0	114128481
LOC114126797	protein VAC14 homolog, transcript variant X1	2215	6.36	2	10.91	0	0	0	0.17	0.05	0.31	0	0	0	0.176667	0	0.02574	-5.27985	0.00255151	0.0299417	yes	down	XP_027846607.1(protein VAC14 homolog [Aphis gossypii])	GO:0006661(biological_process:phosphatidylinositol biosynthetic process); GO:0070772(cellular_component:PAS complex)	K15305	VAC14, TAX1BP2	map05166(Human T-cell leukemia virus 1 infection); map05203(Viral carcinogenesis)	ENOG410XP6E(U:Intracellular trafficking, secretion, and vesicular transport)	ENOG410XP6E(vac14 homolog (S. cerevisiae))	PF11916.9(Vac14_Fig4_bd:Vacuolar protein 14 C-terminal Fig4p binding); PF12755.8(Vac14_Fab1_bd:Vacuolar 14 Fab1-binding region); PF12460.9(MMS19_C:RNAPII transcription regulator C-terminal); PF07571.14(TAF6_C:TAF6 C-terminal HEAT repeat domain)	sp|Q5ZIW5|VAC14_CHICK(Protein VAC14 homolog OS=Gallus gallus OX=9031 GN=VAC14 PE=2 SV=1)	114126797
LOC114127061	uncharacterized LOC114127061	740	152	198	143	63	53	80	48.63	50.44	45.62	17.99	16.58	25.66	48.23	20.0767	0.36229	-1.46478	3.12e-09	1.77e-07	yes	down	XP_027846969.1(uncharacterized protein LOC114127061 [Aphis gossypii])	0	0	0	0	0	0	0	0	114127061
LOC114126367	pupal cuticle protein Edg-84A-like	678	10	3	10	0	1	0	1.3	0.33	1.39	0	0.13	0	1.00667	0.0433333	0.0412734	-4.59864	0.00379164	0.0408563	yes	down	XP_027846105.1(pupal cuticle protein Edg-84A-like [Aphis gossypii])	GO:0042302(molecular_function:structural constituent of cuticle)	0	0	0	ENOG41115ER(S:Function unknown); ENOG410YRDB(S:Function unknown); ENOG4111VJY(S:Function unknown); ENOG41116Y9(S:Function unknown)	ENOG41115ER(Insect cuticle protein); ENOG410YRDB(Insect cuticle protein); ENOG4111VJY(Insect cuticle protein); ENOG41116Y9(Insect cuticle protein)	PF00379.24(Chitin_bind_4:Insect cuticle protein)	sp|P80683|CUA3A_TENMO(Larval cuticle protein A3A OS=Tenebrio molitor OX=7067 PE=1 SV=1)	114126367
LOC114132521	esterase E4-like, transcript variant X1	1825	106.35	33.31	92.15	178.34	139.51	339.06	3.6	1	3.38	5.57	4.64	11.52	2.66	7.24333	2.47283	1.30616	0.00399024	0.0421642	yes	up	XP_027853797.1(esterase E4-like [Aphis gossypii])	0	K01050;K01049	BCHE;ACHE	map00564(Glycerophospholipid metabolism); map04725(Cholinergic synapse)	COG2272(I:Lipid transport and metabolism)	COG2272(Carboxylesterase)	PF00135.29(COesterase:Carboxylesterase family)	sp|P35502|ESTF_MYZPE(Esterase FE4 OS=Myzus persicae OX=13164 PE=1 SV=1)	114132521
LOC114130484	uncharacterized LOC114130484	839	8	12	10	0	0	0	0.73	0.95	0.99	0	0	0	0.89	0	0.0168499	-5.89111	7.79e-05	0.00164756	yes	down	XP_027851266.1(uncharacterized protein LOC114130484 [Aphis gossypii])	GO:0003964(molecular_function:RNA-directed DNA polymerase activity); GO:0004519(molecular_function:endonuclease activity); GO:0004527(molecular_function:exonuclease activity)	0	0	0	ENOG410YUXC(S:Function unknown); ENOG410Z642(S:Function unknown); ENOG410ZTDB(S:Function unknown); ENOG4111801(S:Function unknown)	ENOG410YUXC(-); ENOG410Z642(-); ENOG410ZTDB(-); ENOG4111801(-)	0	0	114130484
LOC114123962	probable DNA-directed RNA polymerase III subunit RPC6	1136	21.25	10.3	23.38	533.35	573.77	569.17	1.09	0.52	1.34	29.72	33.85	34.33	0.983333	32.6333	28.0059	4.80766	4.94e-65	1.42e-61	yes	up	XP_027842907.1(probable DNA-directed RNA polymerase III subunit RPC6 [Aphis gossypii])	GO:0003899(molecular_function:DNA-directed RNA polymerase activity); GO:0003677(molecular_function:DNA binding); GO:0006383(biological_process:transcription from RNA polymerase III promoter); GO:0005666(cellular_component:DNA-directed RNA polymerase III complex)	K03025	RPC6, POLR3F	map03020(RNA polymerase); map04623(Cytosolic DNA-sensing pathway)	COG5111(K:Transcription)	COG5111(dna-directed rna polymerase iii subunit)	PF05158.13(RNA_pol_Rpc34:RNA polymerase Rpc34 subunit)	sp|Q9VD25|RPC6_DROME(Probable DNA-directed RNA polymerase III subunit RPC6 OS=Drosophila melanogaster OX=7227 GN=CG5380 PE=2 SV=1)	114123962
LOC114131585	DNA oxidative demethylase ALKBH2-like	964	47	62	40	24	24	24	3.51	4	3.23	1.68	1.78	1.82	3.58	1.76	0.442154	-1.17738	0.00143517	0.0188695	yes	down	XP_027852639.1(DNA oxidative demethylase ALKBH2-like [Aphis gossypii])	GO:0016491(molecular_function:oxidoreductase activity)	K10859	ALKBH2	0	COG3145(S:Function unknown)	COG3145(Rac GTPase activating protein 1)	PF13532.7(2OG-FeII_Oxy_2:2OG-Fe(II) oxygenase superfamily)	sp|Q58DM4|ALKB2_BOVIN(DNA oxidative demethylase ALKBH2 OS=Bos taurus OX=9913 GN=ALKBH2 PE=2 SV=1)	114131585
LOC114127014	uncharacterized LOC114127014	1242	8	19	9	41	51	49	0.42	0.87	0.52	2.03	2.68	2.63	0.603333	2.44667	3.60825	1.8513	5.86e-05	0.00129414	yes	up	XP_027846892.1(uncharacterized protein LOC114127014 [Aphis gossypii])	GO:0006396(biological_process:RNA processing)	K14557	UTP6	map03008(Ribosome biogenesis in eukaryotes)	ENOG4111TWK(S:Function unknown)	ENOG4111TWK(-)	0	0	114127014
LOC114124168	uncharacterized LOC114124168, transcript variant X1	1921	11	15	8	28	45	33	0.38	0.47	0.33	0.98	1.59	1.21	0.393333	1.26	2.84601	1.50894	0.00229717	0.0275204	yes	up	KAE9545653.1(hypothetical protein AGLY_001196 [Aphis glycines])	0	0	0	0	0	0	0	0	114124168
LOC114128866	probable multidrug resistance-associated protein lethal(2)03659	4014	317	524	394	966	933	1032	3.83	5.58	5.22	11.01	11.24	12.73	4.87667	11.66	2.18157	1.12537	8.41e-12	6.83e-10	yes	up	XP_027849264.1(probable multidrug resistance-associated protein lethal(2)03659 [Aphis gossypii])	GO:0042626(molecular_function:ATPase activity, coupled to transmembrane movement of substances); GO:0016021(cellular_component:integral component of membrane); GO:0016887(molecular_function:ATPase activity); GO:0005524(molecular_function:ATP binding)	K05673	ABCC4	map04024(cAMP signaling pathway); map01523(Antifolate resistance); map02010(ABC transporters); map04976(Bile secretion)	COG1132(V:Defense mechanisms)	COG1132((ABC) transporter)	PF00005.28(ABC_tran:ABC transporter); PF00664.24(ABC_membrane:ABC transporter transmembrane region); PF02463.20(SMC_N:RecF/RecN/SMC N terminal domain); PF03193.17(RsgA_GTPase:RsgA GTPase)	sp|P91660|L259_DROME(Probable multidrug resistance-associated protein lethal(2)03659 OS=Drosophila melanogaster OX=7227 GN=l(2)03659 PE=2 SV=4)	114128866
LOC114131566	major facilitator superfamily domain-containing protein 6-A-like	1511	456	923	501	167	204	201	24.73	37.44	23.2	15.61	17.24	19.56	28.4567	17.47	0.281531	-1.82863	1.3e-14	1.44e-12	yes	down	XP_027852619.1(major facilitator superfamily domain-containing protein 6-A-like [Aphis gossypii])	GO:0016021(cellular_component:integral component of membrane)	0	0	0	ENOG410YMHR(G:Carbohydrate transport and metabolism)	ENOG410YMHR(Major facilitator superfamily domain containing)	PF12832.8(MFS_1_like:MFS_1 like family); PF07690.17(MFS_1:Major Facilitator Superfamily); PF03825.17(Nuc_H_symport:Nucleoside H+ symporter)	sp|Q1LUQ4|MFD6A_DANRE(Major facilitator superfamily domain-containing protein 6-A OS=Danio rerio OX=7955 GN=mfsd6a PE=3 SV=1)	114131566
LOC114120395	keratin-associated protein 6-2-like	908	35302	38573	39369	19866	18774	13004	2838.08	2684.38	3422.6	1505.79	1503.51	1069.64	2981.69	1359.65	0.418247	-1.25757	9.12e-10	5.71e-08	yes	down	KAE9538116.1(hypothetical protein AGLY_006088, partial [Aphis glycines])	0	0	0	0	0	0	0	0	114120395
LOC114132061	uncharacterized LOC114132061	738	2340.33	2509.33	1530.67	5176	4801	6645.33	263.65	241.02	185.02	546.04	536.18	761.86	229.897	614.693	2.36162	1.23977	8.99e-10	5.67e-08	yes	up	XP_027853238.1(uncharacterized protein LOC114132059 [Aphis gossypii])	0	0	0	0	0	0	0	0	114132061
LOC114130985	uncharacterized LOC114130985	697	43.53	42.06	34.67	1.05	1.44	0.99	6.26	5.01	5.26	0.12	0.18	0.13	5.51	0.143333	0.0224421	-5.47765	6.45e-09	3.47e-07	yes	down	XP_027851895.1(uncharacterized protein LOC114130985, partial [Aphis gossypii])	0	0	0	0	0	0	0	0	114130985
LOC114129567	glutamate-gated chloride channel-like, transcript variant X1	802	6.95	8.62	3.75	19.58	33.11	56.44	1.19	1.09	0.55	2.82	5.58	9.79	0.943333	6.06333	4.89457	2.29118	0.0001611	0.00307836	yes	up	XP_027850152.1(uncharacterized protein LOC114129567 isoform X1 [Aphis gossypii])	0	K05273	GRGLCN	0	ENOG410XPWH(S:Function unknown)	ENOG410XPWH(-)	0	sp|Q94900|GLUCL_DROME(Glutamate-gated chloride channel OS=Drosophila melanogaster OX=7227 GN=GluClalpha PE=1 SV=2)	114129567
LOC114119120	uncharacterized LOC114119120	1415	0	0	1	9	11	25	0	0	0.05	0.38	0.49	1.14	0.0166667	0.67	37.3051	5.2213	0.000276303	0.00478521	yes	up	XP_027836396.1(uncharacterized protein LOC114119120 [Aphis gossypii])	0	0	0	0	ENOG4111H1J(S:Function unknown); ENOG410Y1C8(S:Function unknown)	ENOG4111H1J(-); ENOG410Y1C8(-)	0	0	114119120
LOC114121390	uncharacterized LOC114121390	1356	49	69	35	2	5	9	2.31	2.83	1.79	0.09	0.23	0.43	2.31	0.25	0.0948244	-3.3986	3.02e-09	1.72e-07	yes	down	XP_027839497.1(LOW QUALITY PROTEIN: uncharacterized protein LOC114121390 [Aphis gossypii])	GO:0015074(biological_process:DNA integration); GO:0003676(molecular_function:nucleic acid binding)	0	0	0	COG2801(L:Replication, recombination and repair); ENOG410Y7Q4(S:Function unknown)	COG2801(Retrotransposon protein); ENOG410Y7Q4(-)	PF18701.2(DUF5641:Family of unknown function (DUF5641))	0	114121390
LOC114126239	uncharacterized LOC114126239, transcript variant X2	570	6	12	8	1	0	0	1.21	1.95	1.53	0.17	0	0	1.56333	0.0566667	0.0381739	-4.71127	0.00173743	0.0219877	yes	down	0	0	0	0	0	0	0	0	0	114126239
LOC114122318	uncharacterized LOC114122318	3319	16	17	26	0	0	0	0.26	0.25	0.47	0	0	0	0.326667	0	0.0084691	-6.88357	4.15e-07	1.59e-05	yes	down	XP_027840737.1(uncharacterized protein LOC114122318 [Aphis gossypii])	0	0	0	0	ENOG410YSFD(S:Function unknown); ENOG410YGV8(S:Function unknown); ENOG410ZQ83(S:Function unknown)	ENOG410YSFD(protein Hydra magnipapillata); ENOG410YGV8(-); ENOG410ZQ83(-)	0	0	114122318
LOC114132690	neuronal acetylcholine receptor subunit alpha-7-like	2210	259.29	424.33	366.47	123.33	103	188.66	21.05	29.58	29.52	6.97	6.26	11.07	26.7167	8.1	0.360573	-1.47163	3.54e-09	2e-07	yes	down	XP_027854024.1(LOW QUALITY PROTEIN: neuronal acetylcholine receptor subunit alpha-7-like [Aphis gossypii])	GO:0045211(cellular_component:postsynaptic membrane); GO:0004888(molecular_function:transmembrane signaling receptor activity); GO:0016021(cellular_component:integral component of membrane); GO:0022848(molecular_function:acetylcholine-gated cation channel activity)	K05312	CHRNN	0	ENOG410XQGR(S:Function unknown)	ENOG410XQGR(Sema domain, immunoglobulin domain (Ig), transmembrane domain (TM) and short cytoplasmic domain, (Semaphorin))	PF02931.24(Neur_chan_LBD:Neurotransmitter-gated ion-channel ligand binding domain); PF02932.17(Neur_chan_memb:Neurotransmitter-gated ion-channel transmembrane region)	sp|P22770|ACHA7_CHICK(Neuronal acetylcholine receptor subunit alpha-7 OS=Gallus gallus OX=9031 GN=CHRNA7 PE=1 SV=1)	114132690
LOC114130465	uncharacterized protein DDB_G0283357-like	4955	270	482	458	161	157	144	3.13	5	5.81	1.79	1.78	1.73	4.64667	1.76667	0.351947	-1.50657	7.32e-11	5.31e-09	yes	down	XP_027851246.1(LOW QUALITY PROTEIN: uncharacterized protein DDB_G0283357-like [Aphis gossypii])	0	0	0	0	0	0	0	0	114130465
LOC114125749	uncharacterized LOC114125749	737	26	32	21	2	1	1	2.94	3.08	2.54	0.21	0.11	0.11	2.85333	0.143333	0.0463568	-4.43107	7.08e-07	2.59e-05	yes	down	0	0	0	0	0	0	0	0	0	114125749
LOC114131128	sialin-like	2523	3406.27	4102.91	2759.98	1898	1495.08	2094.75	74.01	79.69	65.72	39.05	32.24	46.84	73.14	39.3767	0.487747	-1.03579	1.06e-08	5.49e-07	yes	down	XP_027852073.1(sialin-like [Aphis gossypii])	GO:0022857(molecular_function:transmembrane transporter activity); GO:0016021(cellular_component:integral component of membrane)	0	0	0	ENOG410XPWC(G:Carbohydrate transport and metabolism); ENOG410ZT7T(P:Inorganic ion transport and metabolism)	ENOG410XPWC(solute carrier family 17); ENOG410ZT7T(Major Facilitator Superfamily)	PF07690.17(MFS_1:Major Facilitator Superfamily)	sp|Q8BN82|S17A5_MOUSE(Sialin OS=Mus musculus OX=10090 GN=Slc17a5 PE=1 SV=2)	114131128
LOC114120816	PRKR-interacting protein 1 homolog	854	149.54	43.75	191.8	11.53	29.8	39.21	11.3	2.95	15.99	0.85	2.22	2.91	10.08	1.99333	0.181444	-2.46241	9.39e-06	0.00026523	yes	down	XP_027838663.1(PRKR-interacting protein 1 homolog [Aphis gossypii])	GO:0003725(molecular_function:double-stranded RNA binding)	0	0	0	ENOG4111T1J(S:Function unknown)	ENOG4111T1J(PRKR interacting protein 1 (IL11 inducible))	PF06658.13(DUF1168:Protein of unknown function (DUF1168))	sp|Q6GNG8|PKRI1_XENLA(PRKR-interacting protein 1 homolog OS=Xenopus laevis OX=8355 GN=prkrip1 PE=2 SV=1)	114120816
LOC114131576	uncharacterized LOC114131576	857	891	1502	978	166	134	179	79.13	114.66	93.69	13.83	11.82	16.19	95.8267	13.9467	0.130962	-2.93278	2.67e-47	2.19e-44	yes	down	XP_027852630.1(uncharacterized protein LOC114131576 [Aphis gossypii])	GO:0016021(cellular_component:integral component of membrane)	0	0	0	ENOG410YMHR(G:Carbohydrate transport and metabolism)	ENOG410YMHR(Major facilitator superfamily domain containing)	PF12832.8(MFS_1_like:MFS_1 like family); PF07690.17(MFS_1:Major Facilitator Superfamily); PF03825.17(Nuc_H_symport:Nucleoside H+ symporter); PF01306.20(LacY_symp:LacY proton/sugar symporter)	0	114131576
LOC114125978	bifunctional lycopene cyclase/phytoene synthase-like	2052	307.54	338.12	310.33	98.98	124.29	157.44	8.74	8.43	9.64	2.65	3.52	4.57	8.93667	3.58	0.358765	-1.47889	4.89e-14	5.05e-12	yes	down	XP_027845628.1(bifunctional lycopene cyclase/phytoene synthase-like [Aphis gossypii])	GO:0016765(molecular_function:transferase activity, transferring alkyl or aryl (other than methyl) groups); GO:0016872(molecular_function:intramolecular lyase activity); GO:0016021(cellular_component:integral component of membrane)	K17841	AL2	0	COG1562(I:Lipid transport and metabolism)	COG1562(phytoene synthase)	PF00494.20(SQS_PSY:Squalene/phytoene synthase)	sp|Q67GH9|LCPS_BLATR(Bifunctional lycopene cyclase/phytoene synthase OS=Blakeslea trispora OX=4850 GN=carRA PE=1 SV=1)	114125978
LOC114119885	piggyBac transposable element-derived protein 4-like	792	0	0	0	61	63	83	0	0	0	5.74	6.28	8.49	0	6.83667	339.086	8.40551	1.11e-11	8.84e-10	yes	up	XP_027837412.1(piggyBac transposable element-derived protein 4-like [Aphis gossypii])	0	0	0	0	ENOG410YA2Y(S:Function unknown)	ENOG410YA2Y(Haemolymph juvenile hormone binding protein (JHBP))	PF13843.7(DDE_Tnp_1_7:Transposase IS4)	sp|Q96DM1|PGBD4_HUMAN(PiggyBac transposable element-derived protein 4 OS=Homo sapiens OX=9606 GN=PGBD4 PE=2 SV=3)	114119885
LOC114126626	small integral membrane protein 20	1332	480.22	570.61	392.56	299.79	268.59	201.71	23.12	23.94	20.57	13.59	12.87	9.91	22.5433	12.1233	0.491471	-1.02482	8.96e-06	0.000253537	yes	down	XP_027846421.1(small integral membrane protein 20 [Aphis gossypii])	GO:0033617(biological_process:mitochondrial respiratory chain complex IV assembly); GO:0016021(cellular_component:integral component of membrane); GO:0005739(cellular_component:mitochondrion)	0	0	0	ENOG410Y1I1(S:Function unknown)	ENOG410Y1I1(chromosome 4 open reading frame 52)	PF15061.7(DUF4538:Domain of unknown function (DUF4538))	0	114126626
LOC114131096	uncharacterized LOC114131096	1949	290	409	406	17	37	28	8.75	10.83	13.39	0.75	1.84	1.39	10.99	1.32667	0.0674654	-3.88971	3.08e-45	2.08e-42	yes	down	XP_027852041.1(uncharacterized protein LOC114131096 [Aphis gossypii])	0	0	0	0	0	0	0	0	114131096
LOC114125650	pro-resilin-like	568	205	154	171	705	923	253	37.42	23.43	32.98	119.81	166.28	46.89	31.2767	110.993	3.2398	1.69591	2.37e-05	0.000590486	yes	up	XP_027845197.1(pro-resilin-like [Aphis gossypii])	GO:0042302(molecular_function:structural constituent of cuticle)	0	0	0	ENOG410ZB5T(S:Function unknown); ENOG410XQTS(S:Function unknown); ENOG41128ZS(S:Function unknown)	ENOG410ZB5T(-); ENOG410XQTS(coiled-coil domain containing 65); ENOG41128ZS(Cuticular protein)	PF00379.24(Chitin_bind_4:Insect cuticle protein)	sp|Q9V7U0|RESIL_DROME(Pro-resilin OS=Drosophila melanogaster OX=7227 GN=resilin PE=1 SV=1)	114125650
LOC114119199	piggyBac transposable element-derived protein 3-like	1956	4	8	5	0	0	0	0.12	0.21	0.16	0	0	0	0.163333	0	0.0300047	-5.05867	0.00306653	0.0347066	yes	down	XP_027836493.1(piggyBac transposable element-derived protein 3-like [Aphis gossypii])	0	0	0	0	ENOG410ZDPG(S:Function unknown); ENOG4110JK7(S:Function unknown); ENOG410YR5R(S:Function unknown)	ENOG410ZDPG(piggyBac transposable element derived); ENOG4110JK7(-); ENOG410YR5R(-)	PF13843.7(DDE_Tnp_1_7:Transposase IS4)	sp|P0DP91|ERPG3_HUMAN(Chimeric ERCC6-PGBD3 protein OS=Homo sapiens OX=9606 GN=ERCC6 PE=1 SV=1)	114119199
LOC114131332	uncharacterized LOC114131332	102	0	0	0	16.7	8.71	6.18	0	0	0	3.3	1.82	1.33	0	2.15	53.8601	5.75114	0.000208103	0.00380526	yes	up	KAF0750574.1(Uncharacterized protein FWK35_00018864 [Aphis craccivora])	0	0	0	0	0	0	0	0	114131332
LOC114121422	uncharacterized LOC114121422	2432	17	27	33	130	115	97	0.4	0.55	0.85	17.49	16.5	14.17	0.6	16.0533	4.0834	2.02977	4.84e-09	2.65e-07	yes	up	XP_027839557.1(uncharacterized protein LOC114121422 [Aphis gossypii])	GO:0003676(molecular_function:nucleic acid binding); GO:0003677(molecular_function:DNA binding)	0	0	0	ENOG410ZN72(S:Function unknown); ENOG4110CDI(S:Function unknown); ENOG410ZI10(S:Function unknown); ENOG410ZH0I(S:Function unknown)	ENOG410ZN72(conserved hypothetical protein); ENOG4110CDI(conserved hypothetical protein); ENOG410ZI10(to conserved); ENOG410ZH0I(-)	PF03184.20(DDE_1:DDE superfamily endonuclease); PF05225.17(HTH_psq:helix-turn-helix, Psq domain); PF00356.22(LacI:Bacterial regulatory proteins, lacI family); PF01371.20(Trp_repressor:Trp repressor protein)	0	114121422
LOC114128571	RYamide receptor, transcript variant X1	1868	17	27	27	53	51	64	0.57	0.7	0.98	1.47	1.49	2.01	0.75	1.65667	2.15832	1.10991	0.00236825	0.0282297	yes	up	XP_027848914.1(RYamide receptor isoform X1 [Aphis gossypii])	GO:0004983(molecular_function:neuropeptide Y receptor activity); GO:0016021(cellular_component:integral component of membrane); GO:0003676(molecular_function:nucleic acid binding)	K14072	Rya-R, NEPYR	0	ENOG410XRW9(U:Intracellular trafficking, secretion, and vesicular transport)	ENOG410XRW9(Receptor)	PF00001.22(7tm_1:7 transmembrane receptor (rhodopsin family)); PF10320.10(7TM_GPCR_Srsx:Serpentine type 7TM GPCR chemoreceptor Srsx); PF10328.10(7TM_GPCR_Srx:Serpentine type 7TM GPCR chemoreceptor Srx); PF13853.7(7tm_4:Olfactory receptor)	sp|P25931|RYAR_DROME(RYamide receptor OS=Drosophila melanogaster OX=7227 GN=RYa-R PE=2 SV=2)	114128571
LOC114125125	uncharacterized LOC114125125	1590	5622.88	7605.89	9843.92	3974.95	3570	3303	216.76	256.41	413.96	144.41	137.1	129.94	295.71	137.15	0.430706	-1.21522	1.23e-08	6.34e-07	yes	down	XP_027844436.1(uncharacterized protein LOC114125125 [Aphis gossypii])	0	0	0	0	0	0	0	0	114125125
LOC114120935	ATP-binding cassette sub-family B member 7, mitochondrial-like	1104	61.61	36.65	49.11	231.38	182.2	151.85	3.8	1.96	3.29	13.43	11.18	9.55	3.01667	11.3867	3.45657	1.78934	7.09e-08	3.2e-06	yes	up	XP_027838839.1(ATP-binding cassette sub-family B member 7, mitochondrial-like [Aphis gossypii])	GO:0042626(molecular_function:ATPase activity, coupled to transmembrane movement of substances); GO:0016021(cellular_component:integral component of membrane); GO:0016887(molecular_function:ATPase activity); GO:0005524(molecular_function:ATP binding)	K05662	ABCB7	map02010(ABC transporters)	COG5265(V:Defense mechanisms)	COG5265(iron ion homeostasis)	PF00005.28(ABC_tran:ABC transporter); PF02463.20(SMC_N:RecF/RecN/SMC N terminal domain)	sp|Q704E8|ABCB7_RAT(ATP-binding cassette sub-family B member 7, mitochondrial OS=Rattus norvegicus OX=10116 GN=Abcb7 PE=1 SV=1)	114120935
LOC114126114	cuticle protein 7-like	908	40090.3	36319.5	28711.9	108242	97897.6	48137.5	3217.45	2515.33	2489.24	7450.9	7020.06	3538.99	2740.67	6003.32	2.22427	1.15333	0.000119572	0.0023869	yes	up	XP_027845793.1(cuticle protein 7-like [Aphis gossypii])	GO:0042302(molecular_function:structural constituent of cuticle)	K03006	RPB1, POLR2A	map03020(RNA polymerase); map05016(Huntington disease)	ENOG410YXTN(S:Function unknown)	ENOG410YXTN(Cuticular protein)	PF00379.24(Chitin_bind_4:Insect cuticle protein)	sp|P11734|CU08_LOCMI(Cuticle protein 8 OS=Locusta migratoria OX=7004 PE=1 SV=1)	114126114
LOC114129740	hemoglobinase-like	1841	2065	2025	2129	4852	5817	4910	66.68	57.31	75.1	147.74	187.2	161.84	66.3633	165.593	2.26924	1.18221	1.71e-15	2.05e-13	yes	up	XP_027850361.1(hemoglobinase-like [Aphis gossypii])	GO:0006624(biological_process:vacuolar protein processing); GO:0051603(biological_process:proteolysis involved in cellular protein catabolic process); GO:0008233(molecular_function:peptidase activity); GO:0004197(molecular_function:cysteine-type endopeptidase activity); GO:0005773(cellular_component:vacuole)	K01369	LGMN	map04612(Antigen processing and presentation); map04142(Lysosome)	COG5206(S:Function unknown)	COG5206(Tight junction associated protein 1 (Peripheral))	PF01650.19(Peptidase_C13:Peptidase C13 family)	sp|P09841|HGLB_SCHMA(Hemoglobinase OS=Schistosoma mansoni OX=6183 PE=1 SV=3)	114129740
LOC114128567	uncharacterized LOC114128567	1408	0	0	0	4.06	56.38	141.1	0	0	0	0.2	2.9	7.43	0	3.51	316.242	8.30488	0.000142563	0.00278447	yes	up	XP_027848907.1(uncharacterized protein LOC114128567 [Aphis gossypii])	GO:0016021(cellular_component:integral component of membrane)	0	0	0	0	0	PF09451.11(ATG27:Autophagy-related protein 27); PF02157.16(Man-6-P_recep:Mannose-6-phosphate receptor)	0	114128567
LOC114131043	uncharacterized LOC114131043	5677	0	0	0	54	73	66	0	0	0	0.47	0.68	0.63	0	0.593333	316.753	8.30721	2.18e-11	1.66e-09	yes	up	XP_027851962.1(uncharacterized protein LOC114131043 [Aphis gossypii])	0	0	0	0	ENOG410Y7Q4(S:Function unknown); COG2801(L:Replication, recombination and repair); ENOG410Z1QR(S:Function unknown)	ENOG410Y7Q4(-); COG2801(Retrotransposon protein); ENOG410Z1QR(-)	PF05380.14(Peptidase_A17:Pao retrotransposon peptidase); PF03564.16(DUF1759:Protein of unknown function (DUF1759)); PF18701.2(DUF5641:Family of unknown function (DUF5641)); PF05585.13(DUF1758:Putative peptidase (DUF1758)); PF17921.2(Integrase_H2C2:Integrase zinc binding domain); PF00078.28(RVT_1:Reverse transcriptase (RNA-dependent DNA polymerase))	0	114131043
LOC114123067	zinc metalloproteinase nas-13-like	1218	470	390	465	203	231	216	25.42	18.35	27.34	10.33	12.43	11.91	23.7033	11.5567	0.441949	-1.17805	2.88e-09	1.65e-07	yes	down	XP_027841730.1(zinc metalloproteinase nas-13-like [Aphis gossypii])	GO:0004222(molecular_function:metalloendopeptidase activity); GO:0008270(molecular_function:zinc ion binding)	0	0	0	ENOG410ZPX7(S:Function unknown)	ENOG410ZPX7(Reverse transcriptase (RNA-dependent DNA polymerase))	PF01400.25(Astacin:Astacin (Peptidase family M12A))	sp|Q20191|NAS13_CAEEL(Zinc metalloproteinase nas-13 OS=Caenorhabditis elegans OX=6239 GN=nas-13 PE=2 SV=5)	114123067
LOC114131296	sepiapterin reductase-like, transcript variant X2	1063	163.33	135.8	173.22	593.82	650.42	648.3	10.22	7.42	11.83	34.98	40.55	41.37	9.82333	38.9667	3.6157	1.85427	1.85e-22	4.09e-20	yes	up	KAE9534460.1(hypothetical protein AGLY_008550 [Aphis glycines])	GO:0006729(biological_process:tetrahydrobiopterin biosynthetic process); GO:0004757(molecular_function:sepiapterin reductase activity)	K00072	SPR	map00790(Folate biosynthesis)	ENOG4111PZG(S:Function unknown)	ENOG4111PZG(sepiapterin reductase (7,8-dihydrobiopterin NADP oxidoreductase))	PF00106.26(adh_short:short chain dehydrogenase); PF13561.7(adh_short_C2:Enoyl-(Acyl carrier protein) reductase)	sp|Q8R536|SPRE_MERUN(Sepiapterin reductase OS=Meriones unguiculatus OX=10047 GN=SPR PE=2 SV=1)	114131296
LOC114130315	uncharacterized LOC114130315	598	14.53	5.35	21.69	77.88	124.16	29.76	2.39	0.74	3.79	11.95	20.19	4.98	2.30667	12.3733	4.96767	2.31257	0.00025605	0.00455134	yes	up	XP_027851062.1(uncharacterized protein LOC114130315 [Aphis gossypii])	GO:0016021(cellular_component:integral component of membrane)	0	0	0	0	0	0	0	114130315
LOC114120275	putative nuclease HARBI1	971	0	0	0	7	7	10	0	0	0	0.49	0.51	0.75	0	0.583333	39.2775	5.29563	0.000866422	0.0125265	yes	up	XP_027837941.1(putative nuclease HARBI1, partial [Aphis gossypii])	0	K23222	HARBI1	0	ENOG411206Y(S:Function unknown)	ENOG411206Y(transposon protein)	PF13359.7(DDE_Tnp_4:DDE superfamily endonuclease); PF04827.15(Plant_tran:Plant transposon protein); PF01609.22(DDE_Tnp_1:Transposase DDE domain)	sp|Q6AZB8|HARB1_DANRE(Putative nuclease HARBI1 OS=Danio rerio OX=7955 GN=harbi1 PE=2 SV=1)	114120275
LOC114130584	protein ALP1-like	1470	9	14	23	0	0	1	0.38	0.52	1.07	0	0	0.04	0.656667	0.0133333	0.0212839	-5.55409	7.99e-05	0.00167765	yes	down	XP_027851388.1(protein ALP1-like [Aphis gossypii])	0	K23222	HARBI1	0	ENOG411206Y(S:Function unknown); COG2801(L:Replication, recombination and repair)	ENOG411206Y(transposon protein); COG2801(Retrotransposon protein)	PF13359.7(DDE_Tnp_4:DDE superfamily endonuclease); PF04827.15(Plant_tran:Plant transposon protein)	sp|Q9M2U3|ALPL_ARATH(Protein ALP1-like OS=Arabidopsis thaliana OX=3702 GN=At3g55350 PE=2 SV=1)	114130584
LOC114123127	uncharacterized LOC114123127	946	8	9	3	0	0	0	0.61	0.6	0.25	0	0	0	0.486667	0	0.0252127	-5.30971	0.00151711	0.0197655	yes	down	XP_027841791.1(uncharacterized protein LOC114123127, partial [Aphis gossypii])	0	0	0	0	ENOG410YH80(S:Function unknown); ENOG4111KV5(S:Function unknown)	ENOG410YH80(-); ENOG4111KV5(-)	0	0	114123127
LOC114120244	uncharacterized LOC114120244	1097	61	143	89	48	10	43	3.8	7.72	6.01	2.81	0.62	2.73	5.84333	2.05333	0.322304	-1.63351	0.00132136	0.0176979	yes	down	XP_027837900.1(uncharacterized protein LOC114120244 [Aphis gossypii])	0	0	0	0	0	0	0	0	114120244
LOC114128836	multidrug resistance-associated protein 4-like, transcript variant X1	4321	1313.42	2051.1	1650.21	717.17	740.11	960.57	16.37	22.77	22.48	8.37	9.06	12.13	20.54	9.85333	0.440582	-1.18252	1.2e-13	1.19e-11	yes	down	XP_027849226.1(multidrug resistance-associated protein 4-like isoform X1 [Aphis gossypii])	0	K05673	ABCC4	map04024(cAMP signaling pathway); map01523(Antifolate resistance); map02010(ABC transporters); map04976(Bile secretion)	COG1132(V:Defense mechanisms)	COG1132((ABC) transporter)	PF00664.24(ABC_membrane:ABC transporter transmembrane region); PF00005.28(ABC_tran:ABC transporter); PF02463.20(SMC_N:RecF/RecN/SMC N terminal domain); PF01926.24(MMR_HSR1:50S ribosome-binding GTPase); PF01935.18(DUF87:Helicase HerA, central domain)	sp|P91660|L259_DROME(Probable multidrug resistance-associated protein lethal(2)03659 OS=Drosophila melanogaster OX=7227 GN=l(2)03659 PE=2 SV=4)	114128836
LOC114122658	UDP-glucuronosyltransferase 1-2-like, transcript variant X1	1747	231	291	235	122	90	192	6.09	6.58	6.8	3.09	2.4	5.27	6.49	3.58667	0.483235	-1.0492	7.84e-05	0.00165504	yes	down	XP_027841187.1(UDP-glucuronosyltransferase 2B1-like isoform X1 [Aphis gossypii])	GO:0016758(molecular_function:transferase activity, transferring hexosyl groups); GO:0015020(molecular_function:glucuronosyltransferase activity); GO:0016021(cellular_component:integral component of membrane)	K00699	UGT	map05204(Chemical carcinogenesis); map00983(Drug metabolism - other enzymes); map00982(Drug metabolism - cytochrome P450); map00980(Metabolism of xenobiotics by cytochrome P450); map00040(Pentose and glucuronate interconversions); map00860(Porphyrin and chlorophyll metabolism); map00053(Ascorbate and aldarate metabolism); map00830(Retinol metabolism); map00140(Steroid hormone biosynthesis)	COG1819(S:Function unknown)	COG1819(Transferase)	PF00201.19(UDPGT:UDP-glucoronosyl and UDP-glucosyl transferase); PF04101.17(Glyco_tran_28_C:Glycosyltransferase family 28 C-terminal domain)	sp|P19488|UDB37_RAT(UDP-glucuronosyltransferase 2B37 OS=Rattus norvegicus OX=10116 GN=Ugt2b37 PE=2 SV=1)	114122658
LOC114123743	uncharacterized LOC114123743, transcript variant X1	638	93	139	114	46	62	50	18.28	21.7	22.59	8.71	11.6	9.79	20.8567	10.0333	0.417804	-1.2591	2.54e-06	8.33e-05	yes	down	XP_027842614.1(uncharacterized protein LOC114123743 isoform X1 [Aphis gossypii])	0	0	0	0	0	0	0	0	114123743
LOC114130445	trihelix transcription factor GTL2-like	1200	8	7	14	0	0	2	0.44	0.34	0.84	0	0	0.11	0.54	0.0366667	0.0610042	-4.03495	0.00357753	0.0391752	yes	down	XP_027851219.1(trihelix transcription factor GTL2-like [Aphis gossypii])	GO:0016301(molecular_function:kinase activity); GO:0003677(molecular_function:DNA binding)	0	0	0	ENOG4111YV1(S:Function unknown)	ENOG4111YV1(TP53 regulated inhibitor of apoptosis 1)	PF13837.7(Myb_DNA-bind_4:Myb/SANT-like DNA-binding domain); PF10545.10(MADF_DNA_bdg:Alcohol dehydrogenase transcription factor Myb/SANT-like); PF00249.32(Myb_DNA-binding:Myb-like DNA-binding domain)	0	114130445
LOC114123087	uncharacterized LOC114123087, transcript variant X1	1401	74	146	79	9	7	12	3.36	5.78	3.91	0.39	0.32	0.56	4.35	0.423333	0.0864511	-3.53197	5.12e-16	6.6e-14	yes	down	XP_027841751.1(uncharacterized protein LOC114123087 isoform X1 [Aphis gossypii])	0	0	0	0	ENOG410YWDK(S:Function unknown); ENOG410YDX6(S:Function unknown); COG0507(L:Replication, recombination and repair)	ENOG410YWDK(-); ENOG410YDX6(-); COG0507(exodeoxyribonuclease v alpha)	0	0	114123087
LOC114123277	ring canal kelch homolog	1237	0	0	0	32.41	45.37	58.16	0	0	0	1.62	2.39	3.14	0	2.38333	219.926	7.78088	9.8e-10	6.07e-08	yes	up	XP_027841986.1(LOW QUALITY PROTEIN: uncharacterized protein LOC114123278 [Aphis gossypii])	0	K10443;K10448	KLHL2_3;KLHL10	0	ENOG410XNX8(S:Function unknown); COG2801(L:Replication, recombination and repair)	ENOG410XNX8(kelch-like); COG2801(Retrotransposon protein)	PF07707.16(BACK:BTB And C-terminal Kelch); PF00651.32(BTB:BTB/POZ domain); PF01344.26(Kelch_1:Kelch motif)	sp|Q70JS2|KELC_ANOST(Ring canal kelch homolog OS=Anopheles stephensi OX=30069 GN=kel PE=2 SV=2)	114123277
LOC114128170	ras-like GTP-binding protein RhoL	845	67.52	130.16	82.97	200.75	235.33	259.61	6.13	10.15	8.12	17.09	21.2	24	8.13333	20.7633	2.2743	1.18542	5.92e-07	2.21e-05	yes	up	KAF0771170.1(ras-like GTP-binding protein RhoL [Aphis craccivora])	GO:0007264(biological_process:small GTPase mediated signal transduction); GO:0003924(molecular_function:GTPase activity); GO:0005525(molecular_function:GTP binding)	K04392	RAC1	map05167(Kaposi sarcoma-associated herpesvirus infection); map04650(Natural killer cell mediated cytotoxicity); map05210(Colorectal cancer); map05211(Renal cell carcinoma); map05212(Pancreatic cancer); map04015(Rap1 signaling pathway); map04014(Ras signaling pathway); map04010(MAPK signaling pathway); map04013(MAPK signaling pathway - fly); map05169(Epstein-Barr virus infection); map04370(VEGF si…	COG1100(S:Function unknown)	COG1100(EF-hand domain (C-terminal) containing)	PF00071.23(Ras:Ras family); PF08477.14(Roc:Ras of Complex, Roc, domain of DAPkinase); PF00025.22(Arf:ADP-ribosylation factor family)	sp|Q24192|RHOL_DROME(Ras-like GTP-binding protein RhoL OS=Drosophila melanogaster OX=7227 GN=RhoL PE=2 SV=1)	114128170
ND6	NADH dehydrogenase subunit 6	492	34	13	35	7	4	3	8.55	2.67	9.16	1.63	0.99	0.76	6.79333	1.12667	0.15295	-2.70887	0.000169532	0.00322872	yes	down	QEV85450.1(NADH dehydrogenase subunit 6 [Aphis gossypii])	GO:0016021(cellular_component:integral component of membrane); GO:0005739(cellular_component:mitochondrion)	K03884	ND6	map04723(Retrograde endocannabinoid signaling); map05012(Parkinson disease); map05010(Alzheimer disease); map05016(Huntington disease); map04714(Thermogenesis); map00190(Oxidative phosphorylation)	0	0	0	0	19909109
LOC114125983	bifunctional lycopene cyclase/phytoene synthase-like	2111	133.46	146.88	145.78	57.02	21.71	56.56	10.09	9.72	11.94	4.03	1.47	4.34	10.5833	3.28	0.290701	-1.78239	4.91e-07	1.86e-05	yes	down	XP_027845633.1(bifunctional lycopene cyclase/phytoene synthase-like [Aphis gossypii])	GO:0016765(molecular_function:transferase activity, transferring alkyl or aryl (other than methyl) groups); GO:0016872(molecular_function:intramolecular lyase activity); GO:0016021(cellular_component:integral component of membrane)	K17841	AL2	0	COG1562(I:Lipid transport and metabolism)	COG1562(phytoene synthase)	PF00494.20(SQS_PSY:Squalene/phytoene synthase)	sp|Q67GH9|LCPS_BLATR(Bifunctional lycopene cyclase/phytoene synthase OS=Blakeslea trispora OX=4850 GN=carRA PE=1 SV=1)	114125983
LOC114124627	uncharacterized LOC114124627	341	116	212	182	70	68	77	90.44	122.03	132.75	48.88	50.41	60.1	115.073	53.13	0.387435	-1.36798	1.12e-07	4.88e-06	yes	down	0	0	0	0	0	0	0	0	0	114124627
LOC114126125	cuticle protein 7-like	606	1379.77	1552.73	1268.17	0	0	24.67	221.26	208.96	216.11	0	0	4.02	215.443	1.34	0.00508706	-7.61895	0.000254012	0.00452212	yes	down	XP_027845809.1(cuticle protein 7-like [Aphis gossypii])	GO:0042302(molecular_function:structural constituent of cuticle)	0	0	0	ENOG410YXTN(S:Function unknown); ENOG410YXZN(S:Function unknown)	ENOG410YXTN(Cuticular protein); ENOG410YXZN(Cuticular protein)	PF00379.24(Chitin_bind_4:Insect cuticle protein)	sp|P11734|CU08_LOCMI(Cuticle protein 8 OS=Locusta migratoria OX=7004 PE=1 SV=1)	114126125
LOC114119194	uncharacterized LOC114119194	1011	5	6	6	0	0	0	0.35	0.36	0.45	0	0	0	0.386667	0	0.0295486	-5.08076	0.00261964	0.0305847	yes	down	XP_027836487.1(uncharacterized protein LOC114119194, partial [Aphis gossypii])	GO:0015074(biological_process:DNA integration); GO:0003676(molecular_function:nucleic acid binding)	0	0	0	COG2801(S:Function unknown); ENOG410YP2D(S:Function unknown); ENOG410Y3Y9(S:Function unknown)	COG2801(Anillin, actin binding protein); ENOG410YP2D(Integrase core domain protein); ENOG410Y3Y9(Integrase core domain protein)	PF17921.2(Integrase_H2C2:Integrase zinc binding domain); PF00665.27(rve:Integrase core domain)	0	114119194
LOC114130762	uncharacterized LOC114130762	1524	413	138	361	131	131	61	16.78	4.9	15.99	5.01	5.3	2.53	12.5567	4.28	0.316387	-1.66024	0.000200456	0.0037033	yes	down	XP_027851613.1(uncharacterized protein LOC114130762, partial [Aphis gossypii])	0	0	0	0	0	0	0	0	114130762
LOC114131672	uncharacterized LOC114131672	188	3777.87	7547.72	5126.47	3497.8	1375.42	3967.79	1696.59	2639.34	2292.46	1433.55	598.81	1795.47	2209.46	1275.94	0.497479	-1.00729	0.00245895	0.0290638	yes	down	KAF0772052.1(Uncharacterized protein FWK35_00005487 [Aphis craccivora])	0	0	0	0	0	0	0	0	114131672
LOC114125916	endocuticle structural glycoprotein SgAbd-2-like, transcript variant X1	1069	56746	72413	61912	23219	22578	20897	3655.57	4044.55	4327.15	1407.82	1446	1372.73	4009.09	1408.85	0.319846	-1.64455	2.05e-36	9.81e-34	yes	down	XP_027845535.1(larval cuticle protein LCP-22-like isoform X1 [Aphis gossypii])	GO:0042302(molecular_function:structural constituent of cuticle)	0	0	0	ENOG4111PJ1(S:Function unknown)	ENOG4111PJ1(Cuticular protein)	PF00379.24(Chitin_bind_4:Insect cuticle protein)	sp|Q7M4F3|CUD2_SCHGR(Endocuticle structural glycoprotein SgAbd-2 OS=Schistocerca gregaria OX=7010 PE=1 SV=1)	114125916
LOC114121740	tetraspanin-5-like	630	0	0	0.99	21.48	16.96	2.25	0	0	0.16	2.99	2.5	0.34	0.0533333	1.94333	34.8201	5.12185	0.00119173	0.0162851	yes	up	XP_027839989.1(tetraspanin-5-like [Aphis gossypii])	GO:0016021(cellular_component:integral component of membrane)	K17345	TSPAN5	0	ENOG4111IRY(S:Function unknown)	ENOG4111IRY(tetraspanin)	PF00335.21(Tetraspanin:Tetraspanin family)	0	114121740
LOC114120603	uncharacterized LOC114120603	1923	0	3	5	121	140	190	0	0.04	0.09	1.88	2.36	3.19	0.0433333	2.47667	51.0966	5.67516	9.25e-22	2e-19	yes	up	XP_027838360.1(uncharacterized protein LOC114120603 [Aphis gossypii])	GO:0015074(biological_process:DNA integration); GO:0003676(molecular_function:nucleic acid binding)	0	0	0	ENOG410YP2D(S:Function unknown); COG2801(L:Replication, recombination and repair); ENOG410Z1QR(S:Function unknown)	ENOG410YP2D(Integrase core domain protein); COG2801(Retrotransposon protein); ENOG410Z1QR(-)	PF18701.2(DUF5641:Family of unknown function (DUF5641)); PF17921.2(Integrase_H2C2:Integrase zinc binding domain); PF00665.27(rve:Integrase core domain)	0	114120603
LOC114131677	protein Fer3-like	1801	118	128	79	433	411	237	3.87	3.69	2.83	13.44	13.4	7.92	3.46333	11.5867	3.06712	1.61688	1.61e-07	6.64e-06	yes	up	XP_027852771.1(protein Fer3-like [Aphis gossypii])	GO:0046983(molecular_function:protein dimerization activity)	K22400	FERD3L	0	ENOG4111V63(S:Function unknown); ENOG411227D(S:Function unknown)	ENOG4111V63(Fer3-like (Drosophila)); ENOG411227D(Fer3-like (Drosophila))	PF00010.27(HLH:Helix-loop-helix DNA-binding domain)	sp|Q9VGJ5|FER3_DROME(Protein Fer3 OS=Drosophila melanogaster OX=7227 GN=fer3 PE=2 SV=2)	114131677
LOC114123193	cytochrome P450 6k1-like	1836	9905.98	16195.9	8614.43	3791.01	3813.67	3555.98	315.31	451.7	298.65	111.7	116.5	114.09	355.22	114.097	0.297589	-1.74861	1.65e-18	2.74e-16	yes	down	XP_027841888.1(cytochrome P450 6k1-like [Aphis gossypii])	GO:0005506(molecular_function:iron ion binding); GO:0016705(molecular_function:oxidoreductase activity, acting on paired donors, with incorporation or reduction of molecular oxygen); GO:0016021(cellular_component:integral component of membrane); GO:0004497(molecular_function:monooxygenase activity); GO:0020037(molecular_function:heme binding)	K14999	CYP6	0	COG2124(Q:Secondary metabolites biosynthesis, transport and catabolism)	COG2124(Cytochrome p450)	PF00067.23(p450:Cytochrome P450)	sp|Q964R0|CP6K1_BLAGE(Cytochrome P450 6k1 OS=Blattella germanica OX=6973 GN=CYP6K1 PE=2 SV=1)	114123193
LOC114125982	restriction of telomere capping protein 5-like	1819	21.48	14.71	32.77	7.43	2.76	3.21	0.7	0.42	1.17	0.23	0.09	0.11	0.763333	0.143333	0.171012	-2.54783	0.000421047	0.00675203	yes	down	XP_027845828.1(uncharacterized protein LOC114126140 [Aphis gossypii])	0	0	0	0	ENOG410ZNCI(S:Function unknown)	ENOG410ZNCI(TLD)	PF07534.17(TLD:TLD)	0	114125982
LOC114125013	uncharacterized LOC114125013	1082	15.58	15.08	26.68	2.89	1.95	3	0.99	0.83	1.84	0.17	0.12	0.19	1.22	0.16	0.12453	-3.00544	0.000136488	0.00268872	yes	down	XP_027844287.1(uncharacterized protein LOC114125013 [Aphis gossypii])	GO:0016021(cellular_component:integral component of membrane)	0	0	0	ENOG410Z8J4(S:Function unknown)	ENOG410Z8J4(osiris 21)	PF07898.14(DUF1676:Protein of unknown function (DUF1676))	0	114125013
LOC114127950	flocculation protein FLO11-like	2348	9383	9393	12315	5061	4805	4092	228.18	200.74	327.74	116.13	116.51	101.6	252.22	111.413	0.408484	-1.29165	2.16e-11	1.65e-09	yes	down	XP_027848132.1(flocculation protein FLO11-like [Aphis gossypii])	GO:0005576(cellular_component:extracellular region); GO:0008061(molecular_function:chitin binding)	K06237	COL4A	map05165(Human papillomavirus infection); map04510(Focal adhesion); map05146(Amoebiasis); map04512(ECM-receptor interaction); map05200(Pathways in cancer); map04974(Protein digestion and absorption); map04933(AGE-RAGE signaling pathway in diabetic complications); map04926(Relaxin signaling pathway); map04151(PI3K-Akt signaling pathway); map05222(Small cell lung cancer)	ENOG410ZPH9(S:Function unknown); ENOG410XQ49(S:Function unknown); ENOG4111HJZ(S:Function unknown)	ENOG410ZPH9(Chitin binding Peritrophin-A domain); ENOG410XQ49(Chitin binding Peritrophin-A domain); ENOG4111HJZ(cuticular protein analogous to peritrophins 3-E)	PF01607.25(CBM_14:Chitin binding Peritrophin-A domain)	sp|O76217|PE1_ANOGA(Peritrophin-1 OS=Anopheles gambiae OX=7165 GN=Aper1 PE=2 SV=2)	114127950
LOC114119891	uncharacterized LOC114119891	1316	469	438	511	1132	1530	797	22.93	18.66	27.19	52.12	74.47	39.75	22.9267	55.4467	2.21905	1.14994	7.21e-06	0.000210862	yes	up	XP_027837426.1(uncharacterized protein LOC114119891 [Aphis gossypii])	0	0	0	0	ENOG410Z9TD(S:Function unknown)	ENOG410Z9TD(-)	0	0	114119891
LOC114122428	uncharacterized LOC114122428	1805	49.79	23.23	43.81	16.23	15.29	3.98	1.65	0.67	1.58	0.51	0.5	0.13	1.3	0.38	0.270241	-1.88768	0.00216918	0.026345	yes	down	XP_027840883.1(uncharacterized protein LOC114122428 [Aphis gossypii])	0	0	0	0	0	0	0	0	114122428
LOC114129493	piwi-like protein Siwi	2850	2	3	0	31	2	29	0.04	0.05	0	0.57	0.04	0.58	0.03	0.396667	11.5058	3.52429	0.00253284	0.0298142	yes	up	XP_027850046.1(piwi-like protein Siwi [Aphis gossypii])	GO:0031047(biological_process:gene silencing by RNA); GO:0003676(molecular_function:nucleic acid binding)	K02156	AUB, PIWI	map04320(Dorso-ventral axis formation)	ENOG410XNRH(J:Translation, ribosomal structure and biogenesis)	ENOG410XNRH(piwi-like)	PF02171.18(Piwi:Piwi domain); PF02170.23(PAZ:PAZ domain); PF16486.6(ArgoN:N-terminal domain of argonaute)	sp|A8D8P8|SIWI_BOMMO(Piwi-like protein Siwi OS=Bombyx mori OX=7091 GN=Siwi PE=1 SV=1)	114129493
LOC114131370	uncharacterized LOC114131370	1011	245	266	290	91	185	80	17.08	16.04	21.9	5.96	12.82	5.68	18.34	8.15333	0.403777	-1.30837	3.98e-05	0.000933724	yes	down	XP_027852365.1(uncharacterized protein LOC114131370 [Aphis gossypii])	0	0	0	0	0	0	0	0	114131370
LOC114130874	facilitated trehalose transporter Tret1-2 homolog	2766	1247	1767	1211	487	415	409	25.2	31.42	26.8	9.29	8.36	8.44	27.8067	8.69667	0.285988	-1.80597	6.38e-24	1.59e-21	yes	down	XP_027851745.1(facilitated trehalose transporter Tret1-2 homolog [Aphis gossypii])	GO:0022857(molecular_function:transmembrane transporter activity); GO:0016021(cellular_component:integral component of membrane); GO:0008643(biological_process:carbohydrate transport)	K08145	SLC2A8, GLUT8	0	ENOG410XNQK(G:Carbohydrate transport and metabolism)	ENOG410XNQK(Transporter)	PF00083.25(Sugar_tr:Sugar (and other) transporter); PF07690.17(MFS_1:Major Facilitator Superfamily)	sp|B4P624|TRET1_DROYA(Facilitated trehalose transporter Tret1 OS=Drosophila yakuba OX=7245 GN=Tret1 PE=3 SV=1)	114130874
LOC114131770	glucose dehydrogenase [FAD, quinone]-like	2045	1	0	0	9	8	10	0.03	0	0	0.24	0.23	0.29	0.01	0.253333	22.8027	4.51113	0.00262821	0.0306536	yes	up	XP_027852872.1(glucose dehydrogenase [FAD, quinone]-like [Aphis gossypii])	GO:0016021(cellular_component:integral component of membrane); GO:0050660(molecular_function:flavin adenine dinucleotide binding); GO:0016614(molecular_function:oxidoreductase activity, acting on CH-OH group of donors)	0	0	0	COG2303(E:Amino acid transport and metabolism)	COG2303(oxidoreductase)	PF00732.20(GMC_oxred_N:GMC oxidoreductase); PF05199.14(GMC_oxred_C:GMC oxidoreductase); PF05834.13(Lycopene_cycl:Lycopene cyclase protein)	sp|P18173|DHGL_DROME(Glucose dehydrogenase [FAD, quinone] OS=Drosophila melanogaster OX=7227 GN=Gld PE=3 SV=3)	114131770
LOC114130526	uncharacterized LOC114130526	533	1056	906	1296	406	428	216	220.82	156.55	284.66	78.86	88.17	45.81	220.677	70.9467	0.293851	-1.76684	1.69e-09	9.96e-08	yes	down	XP_027851317.1(uncharacterized protein LOC114130526 [Aphis gossypii])	0	0	0	0	0	0	0	0	114130526
LOC114125707	dynein heavy chain 5, axonemal, transcript variant X1	14353	21	39.02	37	130.05	128.03	164.04	0.07	0.12	0.14	0.44	0.45	0.6	0.11	0.496667	3.97351	1.99041	1.44e-11	1.13e-09	yes	up	XP_027845274.1(dynein heavy chain 5, axonemal isoform X1 [Aphis gossypii])	GO:0030286(cellular_component:dynein complex); GO:0007018(biological_process:microtubule-based movement); GO:0003777(molecular_function:microtubule motor activity); GO:0005524(molecular_function:ATP binding)	K10408	DNAH	map05016(Huntington disease)	COG5245(S:Function unknown)	COG5245(-)	PF12774.8(AAA_6:Hydrolytic ATP binding site of dynein motor region); PF08393.14(DHC_N2:Dynein heavy chain, N-terminal region 2); PF08385.13(DHC_N1:Dynein heavy chain, N-terminal region 1); PF18199.2(Dynein_C:Dynein heavy chain C-terminal domain); PF12780.8(AAA_8:P-loop containing dynein motor region D4); PF12781.8(AAA_9:ATP-binding dynein motor region); PF12775.8(AAA_7:P-loop containing dynein mo…	sp|Q8TE73|DYH5_HUMAN(Dynein heavy chain 5, axonemal OS=Homo sapiens OX=9606 GN=DNAH5 PE=1 SV=3)	114125707
LOC114125366	myogenesis-regulating glycosidase-like	774	2296.8	3119.53	2282.8	448.83	563.97	1237.63	70.62	75.26	70.49	12.75	17.65	40.03	72.1233	23.4767	0.262014	-1.93229	3.88e-11	2.89e-09	yes	down	XP_027844783.1(myogenesis-regulating glycosidase-like [Aphis gossypii])	0	0	0	0	COG1501(S:Function unknown)	COG1501(Transfer protein)	PF01055.27(Glyco_hydro_31:Glycosyl hydrolases family 31)	sp|Q69ZQ1|MYORG_MOUSE(Myogenesis-regulating glycosidase OS=Mus musculus OX=10090 GN=Myorg PE=1 SV=2)	114125366
LOC114125285	uncharacterized LOC114125285, transcript variant X2	1039	67.82	99.06	46.97	4	1	1	4.72	5.99	3.55	0.27	0.07	0.07	4.75333	0.136667	0.0259323	-5.26911	2.27e-13	2.21e-11	yes	down	XP_027849966.1(LOW QUALITY PROTEIN: lachesin-like [Aphis gossypii])	0	0	0	0	ENOG4110N31(S:Function unknown)	ENOG4110N31(IGc2)	0	sp|Q26474|LACH_SCHAM(Lachesin OS=Schistocerca americana OX=7009 GN=LAC PE=1 SV=1)	114125285
LOC114126727	uncharacterized LOC114126727, transcript variant X1	1118	35	33	31	1	1	1	2.02	1.65	1.92	0.06	0.06	0.06	1.86333	0.06	0.0274101	-5.18915	6.42e-08	2.93e-06	yes	down	XP_027846532.1(uncharacterized protein LOC114126727 isoform X1 [Aphis gossypii])	GO:0003677(molecular_function:DNA binding)	0	0	0	ENOG410Z518(S:Function unknown)	ENOG410Z518(THAP domain containing 9)	0	0	114126727
LOC114120425	carboxypeptidase B-like	1674	436	405	633	246	200	214	15.78	12.83	25.01	8.39	7.21	7.91	17.8733	7.83667	0.405812	-1.30112	1.22e-07	5.28e-06	yes	down	KAE9540859.1(hypothetical protein AGLY_004104 [Aphis glycines])	GO:0004181(molecular_function:metallocarboxypeptidase activity); GO:0008270(molecular_function:zinc ion binding)	0	0	0	COG2866(S:Function unknown)	COG2866(tetratricopeptide repeat domain 26)	PF00246.25(Peptidase_M14:Zinc carboxypeptidase); PF02244.17(Propep_M14:Carboxypeptidase activation peptide)	sp|P04069|CBPB_ASTAS(Carboxypeptidase B OS=Astacus astacus OX=6715 PE=1 SV=1)	114120425
LOC114122166	lipase member H-B-like	1406	0	0	0	29.1	89.08	16.38	0	0	0	1.23	3.99	0.75	0	1.99	221.456	7.79088	2.07e-08	1.04e-06	yes	up	XP_027840554.1(lipase member H-B-like [Aphis gossypii])	GO:0005576(cellular_component:extracellular region); GO:0006629(biological_process:lipid metabolic process); GO:0052689(molecular_function:carboxylic ester hydrolase activity)	K19404	LIPH_I	0	ENOG4111JY5(S:Function unknown); ENOG410YGS3(S:Function unknown)	ENOG4111JY5(Lipase); ENOG410YGS3(pancreatic triacylglycerol lipase)	PF00151.20(Lipase:Lipase)	sp|Q641F6|LIPHB_XENLA(Lipase member H-B OS=Xenopus laevis OX=8355 GN=liph-b PE=2 SV=1)	114122166
LOC114124125	serine protease lint-like	3734	310	446.54	445.99	217.59	175.52	190.62	4.5	5.72	7.1	2.98	2.54	2.83	5.77333	2.78333	0.446312	-1.16388	1.48e-08	7.44e-07	yes	down	XP_027843110.1(serine protease lint-like [Aphis gossypii])	GO:0004252(molecular_function:serine-type endopeptidase activity)	0	0	0	COG5640(O:Posttranslational modification, protein turnover, chaperones)	COG5640(protease)	PF00089.27(Trypsin:Trypsin)	sp|B7YZU2|LINT_DROME(Serine protease filzig OS=Drosophila melanogaster OX=7227 GN=flz PE=2 SV=1)	114124125
LOC114121071	dopamine N-acetyltransferase, transcript variant X1	1427	1958	2596	2336	1241	493	364	102.81	117.21	133.38	62.24	26.16	20.77	117.8	36.39	0.286792	-1.80192	0.00207532	0.0254205	yes	down	XP_026812054.1(dopamine N-acetyltransferase-like isoform X1 [Rhopalosiphum maidis])	GO:0008080(molecular_function:N-acetyltransferase activity)	0	0	0	ENOG4111REY(S:Function unknown)	ENOG4111REY(-)	PF00583.26(Acetyltransf_1:Acetyltransferase (GNAT) family); PF13673.8(Acetyltransf_10:Acetyltransferase (GNAT) domain); PF14542.7(Acetyltransf_CG:GCN5-related N-acetyl-transferase); PF13508.8(Acetyltransf_7:Acetyltransferase (GNAT) domain)	sp|Q94521|DNAT_DROME(Dopamine N-acetyltransferase OS=Drosophila melanogaster OX=7227 GN=AANAT1 PE=1 SV=1)	114121071
LOC114131834	cytochrome P450 4C1-like	1657	16.6	33.64	30.55	78	56.47	124.5	8.13	11.95	13.16	10.03	7.13	11.97	11.08	9.71	2.87777	1.52495	0.000156628	0.00301806	yes	up	XP_027852945.1(LOW QUALITY PROTEIN: cytochrome P450 4C1-like [Aphis gossypii])	0	K15001	CYP4	0	COG2124(Q:Secondary metabolites biosynthesis, transport and catabolism)	COG2124(Cytochrome p450)	PF00067.23(p450:Cytochrome P450)	sp|P29981|CP4C1_BLADI(Cytochrome P450 4C1 OS=Blaberus discoidalis OX=6981 GN=CYP4C1 PE=2 SV=1)	114131834
LOC114127670	uncharacterized LOC114127670	513	316	683	303.98	1784.88	1611.79	2383.8	38.84	71.56	41.21	205.5	196.96	298.85	50.5367	233.77	4.11148	2.03966	8.11e-15	9.21e-13	yes	up	XP_027847788.1(uncharacterized protein LOC114127670, partial [Aphis gossypii])	0	0	0	0	ENOG410ZPYK(S:Function unknown)	ENOG410ZPYK(-)	0	0	114127670
LOC114125471	cuticle protein 16.5-like	654	27371	28422	32709	8151	8827	4758	3803.9	3338.23	4849.24	1058.41	1214.05	672.3	3997.12	981.587	0.225006	-2.15196	4.74e-18	7.15e-16	yes	down	XP_027844937.1(cuticle protein 16.5-like [Aphis gossypii])	0	0	0	0	ENOG410Z4TZ(S:Function unknown)	ENOG410Z4TZ(-)	0	0	114125471
LOC114123584	glycoprotein 3-alpha-L-fucosyltransferase A-like, transcript variant X1	1890	53	60	52	114	160	126	1.88	1.86	2.01	3.47	4.99	4.03	1.91667	4.16333	2.20356	1.13984	1.37e-05	0.000366215	yes	up	XP_027842415.1(glycoprotein 3-alpha-L-fucosyltransferase A-like isoform X1 [Aphis gossypii])	GO:0032580(cellular_component:Golgi cisterna membrane); GO:0016021(cellular_component:integral component of membrane); GO:0006486(biological_process:protein glycosylation); GO:0008417(molecular_function:fucosyltransferase activity)	K00753	E2.4.1.214	map00513(Various types of N-glycan biosynthesis)	ENOG410ZIMX(S:Function unknown)	ENOG410ZIMX((Alpha (1,3) fucosyltransferase)	PF00852.20(Glyco_transf_10:Glycosyltransferase family 10 (fucosyltransferase) C-term); PF17039.6(Glyco_tran_10_N:Fucosyltransferase, N-terminal)	sp|Q9VUL9|FUCTA_DROME(Glycoprotein 3-alpha-L-fucosyltransferase A OS=Drosophila melanogaster OX=7227 GN=FucTA PE=2 SV=2)	114123584
LOC114126128	cuticle protein 19-like	989	29	35.01	24.67	1106.27	968.65	20.01	2.09	2.18	1.92	74.77	69.25	1.47	2.06333	48.4967	22.2416	4.47519	0.000438789	0.00699683	yes	up	XP_027845812.1(cuticle protein 19-like [Aphis gossypii])	GO:0042302(molecular_function:structural constituent of cuticle)	0	0	0	ENOG410YRDB(S:Function unknown); ENOG410YXTN(S:Function unknown)	ENOG410YRDB(Cuticle protein); ENOG410YXTN(Cuticular protein)	PF00379.24(Chitin_bind_4:Insect cuticle protein)	sp|P27780|CUP8_DROME(Pupal cuticle protein Edg-84A OS=Drosophila melanogaster OX=7227 GN=Edg84A PE=2 SV=1)	114126128
LOC114122147	cytochrome P450 4C1-like	1786	35	79	55	4	8	9	1.17	2.32	2.01	0.13	0.27	0.31	1.83333	0.236667	0.114172	-3.13073	1.41e-09	8.41e-08	yes	down	XP_027840519.1(cytochrome P450 4C1-like [Aphis gossypii])	GO:0005506(molecular_function:iron ion binding); GO:0016705(molecular_function:oxidoreductase activity, acting on paired donors, with incorporation or reduction of molecular oxygen); GO:0004497(molecular_function:monooxygenase activity); GO:0020037(molecular_function:heme binding)	K15001	CYP4	0	COG2124(Q:Secondary metabolites biosynthesis, transport and catabolism)	COG2124(Cytochrome p450)	PF00067.23(p450:Cytochrome P450)	sp|P29981|CP4C1_BLADI(Cytochrome P450 4C1 OS=Blaberus discoidalis OX=6981 GN=CYP4C1 PE=2 SV=1)	114122147
LOC114127928	esterase FE4-like, transcript variant X1	1499	1133	2122	1879	533	536	586	48.62	79.54	87.92	21.54	22.91	25.64	72.0267	23.3633	0.296742	-1.75272	5.25e-19	9.41e-17	yes	down	XP_027848097.1(esterase FE4-like isoform X1 [Aphis gossypii])	GO:0016787(molecular_function:hydrolase activity)	K12298	CEL	map04972(Pancreatic secretion); map00100(Steroid biosynthesis); map00561(Glycerolipid metabolism); map04975(Fat digestion and absorption)	COG2272(I:Lipid transport and metabolism)	COG2272(Carboxylesterase)	PF00135.29(COesterase:Carboxylesterase family); PF07859.14(Abhydrolase_3:alpha/beta hydrolase fold)	sp|Q64285|CEL_MOUSE(Bile salt-activated lipase OS=Mus musculus OX=10090 GN=Cel PE=1 SV=1)	114127928
LOC114120513	uncharacterized LOC114120513	808	11	8	5	0	0	0	1.07	0.67	0.52	0	0	0	0.753333	0	0.0206942	-5.59463	0.000415365	0.00668843	yes	down	XP_027838235.1(uncharacterized protein LOC114120513 [Aphis gossypii])	GO:0016021(cellular_component:integral component of membrane)	0	0	0	0	0	0	0	114120513
LOC114124708	proteoglycan 4-like	916	1436	1212	1296	528	384	552	115.42	83.97	112.57	39.85	30.66	45.21	103.987	38.5733	0.334939	-1.57803	1.21e-14	1.36e-12	yes	down	XP_027843855.1(proteoglycan 4-like [Aphis gossypii])	0	0	0	0	0	0	0	0	114124708
LOC114122099	heat shock protein 70 A1-like	2385	585	535	589	292	328	232	13.97	11.23	15.4	6.58	7.81	5.66	13.5333	6.68333	0.452655	-1.14351	5.89e-08	2.7e-06	yes	down	XP_027840464.1(heat shock protein 70 A1-like [Aphis gossypii])	GO:0005524(molecular_function:ATP binding)	K03283	HSPA1s	map05162(Measles); map05145(Toxoplasmosis); map04010(MAPK signaling pathway); map03040(Spliceosome); map05134(Legionellosis); map04612(Antigen processing and presentation); map04213(Longevity regulating pathway - multiple species); map04144(Endocytosis); map04915(Estrogen signaling pathway); map04141(Protein processing in endoplasmic reticulum)	COG0443(O:Posttranslational modification, protein turnover, chaperones)	COG0443(Heat shock protein)	PF00012.21(HSP70:Hsp70 protein); PF06723.14(MreB_Mbl:MreB/Mbl protein)	sp|P41825|HSP71_ANOAL(Heat shock protein 70 A1 OS=Anopheles albimanus OX=7167 GN=HSP70A1 PE=3 SV=1)	114122099
LOC114128793	uncharacterized LOC114128793	611	217.48	283.7	322	100.56	166.91	94.43	33.14	37.43	53.55	14.42	25.01	14.49	41.3733	17.9733	0.401185	-1.31766	1.68e-06	5.68e-05	yes	down	XP_027849180.1(uncharacterized protein LOC114128793 [Aphis gossypii])	0	0	0	0	0	0	0	0	114128793
LOC114125911	uncharacterized LOC114125911, transcript variant X1	1569	292	272	323	138	135	151	11.44	9.32	13.81	5.1	5.27	6.04	11.5233	5.47	0.431882	-1.21129	1.59e-09	9.42e-08	yes	down	XP_027845527.1(uncharacterized protein LOC114125911 [Aphis gossypii])	0	0	0	0	0	0	0	0	114125911
LOC114123840	uncharacterized LOC114123840, transcript variant X1	2455	17	31	27	9	7	9	0.55	0.83	0.86	0.26	0.22	0.29	0.746667	0.256667	0.306359	-1.7067	0.00209584	0.025617	yes	down	0	0	0	0	0	0	0	0	0	114123840
LOC114132060	uncharacterized LOC114132060	738	2340.33	2509.33	1530.67	5176	4801	6645.33	263.65	241.02	185.02	546.04	536.18	761.86	229.897	614.693	2.36162	1.23977	8.99e-10	5.67e-08	yes	up	XP_027853238.1(uncharacterized protein LOC114132059 [Aphis gossypii])	0	0	0	0	0	0	0	0	114132060
LOC114129751	uncharacterized LOC114129751	741	1143	1637	1282	614	677	439	128.14	156.62	154.27	64.52	75.37	50.04	146.343	63.31	0.393071	-1.34714	1.1e-10	7.85e-09	yes	down	XP_027850383.1(uncharacterized protein LOC114129751 [Aphis gossypii])	GO:0042302(molecular_function:structural constituent of cuticle)	0	0	0	0	0	PF00379.24(Chitin_bind_4:Insect cuticle protein)	0	114129751
LOC114123883	pancreatic triacylglycerol lipase-like	1395	12249.2	14445.4	8974.43	5559.28	5013.09	5701.59	558.32	574.64	445.56	238.82	227.7	265.46	526.173	243.993	0.416953	-1.26204	8.58e-13	7.75e-11	yes	down	XP_027842819.1(pancreatic triacylglycerol lipase-like [Aphis gossypii])	GO:0005576(cellular_component:extracellular region); GO:0006629(biological_process:lipid metabolic process); GO:0052689(molecular_function:carboxylic ester hydrolase activity)	0	0	0	ENOG410YGS3(S:Function unknown); ENOG4111JY5(S:Function unknown)	ENOG410YGS3(pancreatic triacylglycerol lipase); ENOG4111JY5(Lipase)	PF00151.20(Lipase:Lipase); PF02230.17(Abhydrolase_2:Phospholipase/Carboxylesterase)	sp|P29183|LIPP_HORSE(Pancreatic triacylglycerol lipase (Fragment) OS=Equus caballus OX=9796 GN=PNLIP PE=1 SV=2)	114123883
LOC114123549	uncharacterized LOC114123549	640	575	413	657	358	256	139	83.15	50.38	101.22	48.35	36.62	20.43	78.25	35.1333	0.418707	-1.25599	0.000416014	0.00668948	yes	down	KAE9526693.1(hypothetical protein AGLY_013341 [Aphis glycines])	GO:0016021(cellular_component:integral component of membrane)	0	0	0	ENOG4111KAT(S:Function unknown); ENOG4111KM1(S:Function unknown)	ENOG4111KAT(Protein of unknown function (DUF1676)); ENOG4111KM1(Protein of unknown function (DUF1676))	PF07898.14(DUF1676:Protein of unknown function (DUF1676))	0	114123549
LOC114124203	uncharacterized LOC114124203	860	499	610	550	82.91	85.55	89.58	40.49	43.53	47.91	6.54	7.43	8.06	43.9767	7.34333	0.142151	-2.8145	6.6e-62	1.51e-58	yes	down	XP_027843194.1(uncharacterized protein LOC114124203 [Aphis gossypii])	0	0	0	0	ENOG410YV20(S:Function unknown)	ENOG410YV20(C1q-like venom protein)	PF00386.22(C1q:C1q domain)	0	114124203
LOC114124817	uncharacterized LOC114124817	3081	0	0	0	10	4	13	0	0	0	0.17	0.07	0.24	0	0.16	44.2845	5.46873	0.000646875	0.00969499	yes	up	XP_027844025.1(uncharacterized protein LOC114124817 [Aphis gossypii])	0	0	0	0	ENOG410ZEVR(S:Function unknown); ENOG410XTIX(S:Function unknown); COG2801(S:Function unknown); ENOG410Y65V(S:Function unknown)	ENOG410ZEVR(-); ENOG410XTIX(-); COG2801(-); ENOG410Y65V(-)	PF00078.28(RVT_1:Reverse transcriptase (RNA-dependent DNA polymerase)); PF17919.2(RT_RNaseH_2:RNase H-like domain found in reverse transcriptase); PF17917.2(RT_RNaseH:RNase H-like domain found in reverse transcriptase); PF03732.18(Retrotrans_gag:Retrotransposon gag protein); PF00098.24(zf-CCHC:Zinc knuckle)	sp|P20825|POL2_DROME(Retrovirus-related Pol polyprotein from transposon 297 OS=Drosophila melanogaster OX=7227 GN=pol PE=4 SV=1)	114124817
LOC114127770	uncharacterized LOC114127770	1230	350	462.03	417	2	0	7.91	9.51	11.04	12.03	0.03	0	0.13	10.86	0.0533333	0.00739536	-7.07916	1.4e-45	1.01e-42	yes	down	XP_027847894.1(uncharacterized protein LOC114127770 [Aphis gossypii])	0	0	0	0	ENOG410XQ1Y(S:Function unknown)	ENOG410XQ1Y(zinc finger)	PF05699.15(Dimer_Tnp_hAT:hAT family C-terminal dimerisation region)	sp|Q5SVZ6|ZMYM1_HUMAN(Zinc finger MYM-type protein 1 OS=Homo sapiens OX=9606 GN=ZMYM1 PE=1 SV=1)	114127770
LOC114127611	maltase A1-like	2162	1339.96	1918.95	1130.53	506	721.53	894.39	40.13	49.62	38.62	12.12	17.8	23.43	42.79	17.7833	0.439216	-1.187	3.11e-08	1.53e-06	yes	down	XP_027847702.1(maltase A1-like [Aphis gossypii])	GO:0003824(molecular_function:catalytic activity); GO:0005975(biological_process:carbohydrate metabolic process)	0	0	0	COG0366(G:Carbohydrate transport and metabolism)	COG0366(alpha amylase, catalytic)	PF00128.25(Alpha-amylase:Alpha amylase, catalytic domain)	sp|O16099|MAL2_DROVI(Maltase 2 OS=Drosophila virilis OX=7244 GN=Mal-B2 PE=3 SV=2)	114127611
LOC114128480	uncharacterized protein KIAA1143 homolog	689	0	0	0	8.4	14.31	5.92	0	0	0	0.93	1.68	0.76	0	1.12333	46.2643	5.53183	0.000421082	0.00675203	yes	up	XP_027848798.1(uncharacterized protein KIAA1143 homolog [Aphis gossypii])	0	0	0	0	ENOG411289D(S:Function unknown)	ENOG411289D(kiaa1143)	PF15377.7(DUF4604:Domain of unknown function (DUF4604))	sp|Q5ZJ97|K1143_CHICK(Uncharacterized protein KIAA1143 homolog OS=Gallus gallus OX=9031 GN=RCJMB04_19n18 PE=2 SV=1)	114128480
LOC114132327	photoreceptor-specific nuclear receptor-like, transcript variant X1	2774	216	277	206	25	39	51	4.19	4.73	4.39	0.47	0.78	1.04	4.43667	0.763333	0.149012	-2.7465	3.27e-25	8.93e-23	yes	down	XP_027853555.1(photoreceptor-specific nuclear receptor-like isoform X1 [Aphis gossypii])	GO:0043565(molecular_function:sequence-specific DNA binding); GO:0003700(molecular_function:transcription factor activity, sequence-specific DNA binding); GO:0005634(cellular_component:nucleus); GO:0003707(molecular_function:steroid hormone receptor activity); GO:0008270(molecular_function:zinc ion binding); GO:0042025(cellular_component:host cell nucleus)	K08546	NR2E3, PNR	0	ENOG410XRZC(S:Function unknown)	ENOG410XRZC(SAP30 binding protein)	PF00104.31(Hormone_recep:Ligand-binding domain of nuclear hormone receptor); PF00105.19(zf-C4:Zinc finger, C4 type (two domains))	sp|Q9TTF0|NR2E3_BOVIN(Photoreceptor-specific nuclear receptor OS=Bos taurus OX=9913 GN=NR2E3 PE=1 SV=2)	114132327
LOC114127506	uncharacterized LOC114127506	670	35706	48956	37533	11505	9175.61	8595	4750.89	5515.93	5334.34	1431.02	1208.71	1162.99	5200.39	1267.57	0.221201	-2.17657	1.53e-33	6.52e-31	yes	down	XP_027847555.1(uncharacterized protein LOC114127506 [Aphis gossypii])	0	0	0	0	ENOG410Z4TZ(S:Function unknown)	ENOG410Z4TZ(-)	0	0	114127506
LOC114127366	uncharacterized LOC114127366	704	1	3	0	43	54	42	0.12	0.31	0	4.91	6.53	5.21	0.143333	5.55	31.9418	4.99738	4.66e-09	2.58e-07	yes	up	0	0	0	0	0	0	0	0	0	114127366
LOC114123931	uncharacterized LOC114123931	804	900	564	904	306	225	144	88.25	47.39	95.42	28.13	21.89	14.38	77.02	21.4667	0.25893	-1.94936	3.75e-09	2.11e-07	yes	down	XP_027842871.1(uncharacterized protein LOC114123931 [Aphis gossypii])	GO:0005615(cellular_component:extracellular space)	K22864	ARMC9	0	COG4826(G:Carbohydrate transport and metabolism)	COG4826(major facilitator Superfamily)	PF00079.21(Serpin:Serpin (serine protease inhibitor))	0	114123931
LOC114131606	major facilitator superfamily domain-containing protein 6-like, transcript variant X1	2244	1143.06	1746.61	948.26	321.23	387.78	242.07	32.06	42.88	28.52	8.69	11.09	7.36	34.4867	9.04667	0.229496	-2.12346	6.94e-18	1.01e-15	yes	down	XP_027852669.1(major facilitator superfamily domain-containing protein 6-like isoform X1 [Aphis gossypii])	GO:0016021(cellular_component:integral component of membrane); GO:0022857(molecular_function:transmembrane transporter activity)	0	0	0	ENOG410YMHR(G:Carbohydrate transport and metabolism)	ENOG410YMHR(Major facilitator superfamily domain containing)	PF12832.8(MFS_1_like:MFS_1 like family); PF07690.17(MFS_1:Major Facilitator Superfamily); PF03825.17(Nuc_H_symport:Nucleoside H+ symporter); PF01306.20(LacY_symp:LacY proton/sugar symporter)	sp|Q8CBH5|MFSD6_MOUSE(Major facilitator superfamily domain-containing protein 6 OS=Mus musculus OX=10090 GN=Mfsd6 PE=1 SV=1)	114131606
LOC114132344	peptide chain release factor 1-like, mitochondrial	1445	12.72	37.13	19.22	108.51	141.38	126.66	0.55	1.41	0.91	4.44	6.11	5.61	0.956667	5.38667	5.05152	2.33672	4.68e-11	3.46e-09	yes	up	XP_027853582.1(peptide chain release factor 1-like, mitochondrial [Aphis gossypii])	GO:0003747(molecular_function:translation release factor activity)	K02835	prfA, MTRF1, MRF1	0	COG0216(S:Function unknown)	COG0216(-)	PF03462.19(PCRF:PCRF domain); PF00472.21(RF-1:RF-1 domain)	sp|Q2KI15|RF1ML_BOVIN(Peptide chain release factor 1-like, mitochondrial OS=Bos taurus OX=9913 GN=MTRF1L PE=2 SV=1)	114132344
LOC114132550	uncharacterized LOC114132550	1509	378.02	276.09	237.03	1758.14	1603.03	1877.84	15.54	9.92	10.63	68.12	65.66	78.79	12.03	70.8567	5.28732	2.40254	1.16e-27	3.71e-25	yes	up	XP_027853838.1(uncharacterized protein LOC114132550 [Aphis gossypii])	GO:0016021(cellular_component:integral component of membrane); GO:0005576(cellular_component:extracellular region)	0	0	0	0	0	PF13930.7(Endonuclea_NS_2:DNA/RNA non-specific endonuclease); PF00030.20(Crystall:Beta/Gamma crystallin)	0	114132550
LOC114125494	glutathione hydrolase 1 proenzyme-like	1866	0	1	3	437	3049	11	0	0.03	0.1	13.1	96.56	0.36	0.0433333	36.6733	803.002	9.64926	2e-06	6.63e-05	yes	up	XP_027844974.1(glutathione hydrolase 1 proenzyme-like [Aphis gossypii])	GO:0006751(biological_process:glutathione catabolic process); GO:0016021(cellular_component:integral component of membrane); GO:0036374(molecular_function:glutathione hydrolase activity)	K18592	GGT1_5, CD224	map00590(Arachidonic acid metabolism); map00480(Glutathione metabolism); map00430(Taurine and hypotaurine metabolism)	COG0405(E:Amino acid transport and metabolism)	COG0405(gamma-glutamyltransferase activity)	PF01019.22(G_glu_transpept:Gamma-glutamyltranspeptidase)	sp|P0DPU3|TX14A_SCODE(Scoloptoxin SSD14 OS=Scolopendra dehaani OX=2609776 PE=1 SV=1)	114125494
LOC114121542	uncharacterized LOC114121542	428	0	0	0	8.98	19	4	0	0	0	0.73	1.64	0.35	0	0.906667	53.1024	5.73071	0.000326718	0.00554115	yes	up	XP_027839665.1(uncharacterized protein LOC114121486 [Aphis gossypii])	0	0	0	0	0	0	0	0	114121542
LOC114128174	ras-related C3 botulinum toxin substrate 3-like	510	138.22	102.88	70.7	25.01	32.45	19.99	61.67	30.52	29.21	17.27	23.79	14.32	40.4667	18.46	0.222796	-2.1662	2.81e-08	1.39e-06	yes	down	XP_027848422.1(ras-like GTP-binding protein RhoL [Aphis gossypii])	GO:0007264(biological_process:small GTPase mediated signal transduction); GO:0003924(molecular_function:GTPase activity); GO:0005525(molecular_function:GTP binding)	K04392	RAC1	map05167(Kaposi sarcoma-associated herpesvirus infection); map04650(Natural killer cell mediated cytotoxicity); map05210(Colorectal cancer); map05211(Renal cell carcinoma); map05212(Pancreatic cancer); map04015(Rap1 signaling pathway); map04014(Ras signaling pathway); map04010(MAPK signaling pathway); map04013(MAPK signaling pathway - fly); map05169(Epstein-Barr virus infection); map04370(VEGF si…	COG1100(S:Function unknown)	COG1100(GTP-binding Protein)	PF00071.23(Ras:Ras family); PF08477.14(Roc:Ras of Complex, Roc, domain of DAPkinase)	sp|P60763|RAC3_HUMAN(Ras-related C3 botulinum toxin substrate 3 OS=Homo sapiens OX=9606 GN=RAC3 PE=1 SV=1)	114128174
LOC114123048	collagen alpha-1(III) chain-like, transcript variant X1	4681	18394	26740	24736	11707	10537	12144	356.61	458.79	527.58	215.58	206.28	243.1	447.66	221.653	0.450928	-1.14903	1.17e-15	1.42e-13	yes	down	XP_027841698.1(collagen alpha-1(III) chain-like isoform X1 [Aphis gossypii])	0	K06237	COL4A	map05165(Human papillomavirus infection); map04510(Focal adhesion); map05146(Amoebiasis); map04512(ECM-receptor interaction); map05200(Pathways in cancer); map04974(Protein digestion and absorption); map04933(AGE-RAGE signaling pathway in diabetic complications); map04926(Relaxin signaling pathway); map04151(PI3K-Akt signaling pathway); map05222(Small cell lung cancer)	ENOG410XNMM(G:Carbohydrate transport and metabolism); ENOG410YSGC(S:Function unknown); ENOG410YS80(S:Function unknown)	ENOG410XNMM(hyaluronoglucosaminidase); ENOG410YSGC(Insect cuticle protein); ENOG410YS80(Insect cuticle protein)	PF01391.19(Collagen:Collagen triple helix repeat (20 copies)); PF00379.24(Chitin_bind_4:Insect cuticle protein)	0	114123048
LOC114121102	uncharacterized LOC114121102	1572	0	0	0	2	3	19	0	0	0	0.07	0.12	0.76	0	0.316667	37.9025	5.24422	0.00387539	0.0414472	yes	up	XP_027839077.1(uncharacterized protein LOC114121102 [Aphis gossypii])	GO:0015074(biological_process:DNA integration); GO:0003676(molecular_function:nucleic acid binding)	0	0	0	COG2801(U:Intracellular trafficking, secretion, and vesicular transport); ENOG4112AZ8(S:Function unknown); ENOG4111PX2(S:Function unknown)	COG2801(potassium intermediate small conductance calcium-activated channel, subfamily N, member); ENOG4112AZ8(-); ENOG4111PX2(-)	PF05380.14(Peptidase_A17:Pao retrotransposon peptidase); PF05585.13(DUF1758:Putative peptidase (DUF1758))	0	114121102
LOC114132038	tachykinin-like peptides receptor 99D	820	15.61	2.82	2.71	35.24	84.89	37.69	1.48	0.23	0.28	3.14	8.01	3.65	0.663333	4.93333	6.29056	2.65319	0.000174019	0.00329774	yes	up	XP_027853207.1(tachykinin-like peptides receptor 99D, partial [Aphis gossypii])	GO:0004983(molecular_function:neuropeptide Y receptor activity); GO:0016021(cellular_component:integral component of membrane)	K14071	LKR	0	ENOG410XSC5(K:Transcription)	ENOG410XSC5(Neurogenic differentiation factor)	PF00001.22(7tm_1:7 transmembrane receptor (rhodopsin family)); PF10320.10(7TM_GPCR_Srsx:Serpentine type 7TM GPCR chemoreceptor Srsx)	sp|P30975|TLR2_DROME(Tachykinin-like peptides receptor 99D OS=Drosophila melanogaster OX=7227 GN=TkR99D PE=2 SV=2)	114132038
LOC114127672	uncharacterized LOC114127672	616	3.09	5.95	3.88	41.58	19.23	8.46	0.12	0.2	0.17	1.54	0.75	0.34	0.163333	0.876667	5.03927	2.33322	0.00461578	0.0471657	yes	up	XP_027847790.1(uncharacterized protein LOC114127672 [Aphis gossypii])	0	0	0	0	ENOG41123CP(S:Function unknown)	ENOG41123CP(-)	0	0	114127672
LOC114125426	uncharacterized LOC114125426	399	11	11	4	0	0	0	5.08	4.23	1.85	0	0	0	3.72	0	0.019315	-5.69413	0.000316213	0.0053789	yes	down	XP_027844863.1(uncharacterized protein LOC114125426, partial [Aphis gossypii])	0	K23209	THAP9	0	ENOG410YUQ7(S:Function unknown); ENOG410Z0EZ(S:Function unknown); ENOG4111JGQ(S:Function unknown); ENOG410Z6AX(S:Function unknown); ENOG4111JB0(S:Function unknown)	ENOG410YUQ7(Integrase core domain protein); ENOG410Z0EZ(-); ENOG4111JGQ(-); ENOG410Z6AX(-); ENOG4111JB0(-)	PF12017.9(Tnp_P_element:Transposase protein)	0	114125426
LOC114129183	uncharacterized LOC114129183	2195	26	37	26	5	10	17	0.68	0.85	0.75	0.12	0.26	0.46	0.76	0.28	0.324371	-1.62428	0.00277059	0.0319888	yes	down	XP_027849637.1(uncharacterized protein LOC114129183 [Aphis gossypii])	GO:0046983(molecular_function:protein dimerization activity)	0	0	0	ENOG4110JQ6(S:Function unknown)	ENOG4110JQ6(Pfam:hATC)	PF05699.15(Dimer_Tnp_hAT:hAT family C-terminal dimerisation region)	sp|Q5SVZ6|ZMYM1_HUMAN(Zinc finger MYM-type protein 1 OS=Homo sapiens OX=9606 GN=ZMYM1 PE=1 SV=1)	114129183
LOC114129678	leucine repeat adapter protein 25-like	1112	1398.76	1505.22	1128.26	541.73	556.28	647.51	85.46	79.8	74.82	31.13	33.81	40.34	80.0267	35.0933	0.392797	-1.34815	2.56e-18	4.08e-16	yes	down	KAE9536503.1(hypothetical protein AGLY_007292 [Aphis glycines])	GO:0016021(cellular_component:integral component of membrane); GO:0004842(molecular_function:ubiquitin-protein transferase activity); GO:0005680(cellular_component:anaphase-promoting complex)	K03358	APC11	map04110(Cell cycle); map04914(Progesterone-mediated oocyte maturation); map04114(Oocyte meiosis); map05166(Human T-cell leukemia virus 1 infection); map04120(Ubiquitin mediated proteolysis)	COG5194(S:Function unknown)	COG5194(Transmembrane protein 33)	PF14854.7(LURAP:Leucine rich adaptor protein); PF15039.7(DUF4530:Domain of unknown function (DUF4530))	sp|Q9CPX9|APC11_MOUSE(Anaphase-promoting complex subunit 11 OS=Mus musculus OX=10090 GN=Anapc11 PE=3 SV=1)	114129678
LOC114126988	cathepsin B-like	1143	3976	11747	4163	502	486	617	234.05	600.49	266.11	27.8	28.46	37.04	366.883	31.1	0.0758391	-3.72091	5.82e-32	2.22e-29	yes	down	XP_027846864.1(cathepsin B-like [Aphis gossypii])	GO:0004197(molecular_function:cysteine-type endopeptidase activity); GO:0050790(biological_process:regulation of catalytic activity)	K01363	CTSB	map04142(Lysosome); map04621(NOD-like receptor signaling pathway); map04924(Renin secretion); map04210(Apoptosis); map04612(Antigen processing and presentation); map04140(Autophagy - animal)	COG4870(O:Posttranslational modification, protein turnover, chaperones)	COG4870(cathepsin)	PF00112.24(Peptidase_C1:Papain family cysteine protease); PF08127.14(Propeptide_C1:Peptidase family C1 propeptide)	sp|P00787|CATB_RAT(Cathepsin B OS=Rattus norvegicus OX=10116 GN=Ctsb PE=1 SV=2)	114126988
LOC114120680	uncharacterized LOC114120680	3620	331	410	382	143	157	178	6.18	7.6	7.76	2.32	2.71	3.02	7.18	2.68333	0.386818	-1.37027	9.49e-17	1.28e-14	yes	down	XP_027838462.1(uncharacterized protein LOC114120680 [Aphis gossypii])	GO:0016758(molecular_function:transferase activity, transferring hexosyl groups); GO:0015020(molecular_function:glucuronosyltransferase activity); GO:0016021(cellular_component:integral component of membrane)	K00699	UGT	map05204(Chemical carcinogenesis); map00983(Drug metabolism - other enzymes); map00982(Drug metabolism - cytochrome P450); map00980(Metabolism of xenobiotics by cytochrome P450); map00040(Pentose and glucuronate interconversions); map00860(Porphyrin and chlorophyll metabolism); map00053(Ascorbate and aldarate metabolism); map00830(Retinol metabolism); map00140(Steroid hormone biosynthesis)	COG1819(S:Function unknown)	COG1819(Transferase)	PF00201.19(UDPGT:UDP-glucoronosyl and UDP-glucosyl transferase); PF04101.17(Glyco_tran_28_C:Glycosyltransferase family 28 C-terminal domain); PF13439.7(Glyco_transf_4:Glycosyltransferase Family 4)	sp|P36511|UDB15_RAT(UDP-glucuronosyltransferase 2B15 OS=Rattus norvegicus OX=10116 GN=Ugt2b15 PE=1 SV=1)	114120680
LOC114128554	uncharacterized LOC114128554	1261	0	0	0	88.8	55.68	124.01	0	0	0	4.32	2.86	6.54	0	4.57333	440.366	8.78256	2.19e-12	1.91e-10	yes	up	XP_027848892.1(uncharacterized protein LOC114128554 [Aphis gossypii])	GO:0016021(cellular_component:integral component of membrane)	0	0	0	0	0	PF09451.11(ATG27:Autophagy-related protein 27); PF02157.16(Man-6-P_recep:Mannose-6-phosphate receptor)	0	114128554
LOC114129275	protein yellow-like, transcript variant X1	1698	62	80	36	26	13	7	2.97	3.54	1.84	1.23	0.58	0.34	2.78333	0.716667	0.242021	-2.0468	0.000146734	0.00285434	yes	down	XP_027849762.1(protein yellow-like isoform X1 [Aphis gossypii])	0	0	0	0	ENOG4110KRD(S:Function unknown)	ENOG4110KRD(Major royal jelly protein)	PF03022.17(MRJP:Major royal jelly protein)	sp|Q9VG08|YELF2_DROME(L-dopachrome tautomerase yellow-f2 OS=Drosophila melanogaster OX=7227 GN=yellow-f2 PE=1 SV=2)	114129275
LOC114128203	uncharacterized LOC114128203, transcript variant X1	693	30	19	17	2	8	5	3.84	2.06	2.33	0.24	1.02	0.65	2.74333	0.636667	0.202067	-2.3071	0.000997441	0.0140833	yes	down	XP_027848462.1(uncharacterized protein LOC114128203 isoform X1 [Aphis gossypii])	0	0	0	0	0	0	0	0	114128203
LOC114121014	uncharacterized LOC114121014	1135	152	103	135	74	32	39	9.03	5.31	8.71	4.14	1.89	2.36	7.68333	2.79667	0.33844	-1.56303	7.56e-05	0.00161017	yes	down	XP_027838953.1(uncharacterized protein LOC114121014 [Aphis gossypii])	GO:0042302(molecular_function:structural constituent of cuticle)	0	0	0	ENOG410YXZN(S:Function unknown); ENOG410YXTN(S:Function unknown)	ENOG410YXZN(Cuticular protein); ENOG410YXTN(Cuticular protein)	PF00379.24(Chitin_bind_4:Insect cuticle protein)	sp|P11734|CU08_LOCMI(Cuticle protein 8 OS=Locusta migratoria OX=7004 PE=1 SV=1)	114121014
LOC114123267	dynamin-1-like protein	2127	3	10	9	23	27	27	0.08	0.24	0.27	0.59	0.73	0.75	0.196667	0.69	3.21969	1.68692	0.00434464	0.0450373	yes	up	XP_027841973.1(dynamin-1-like protein [Aphis gossypii])	GO:0003924(molecular_function:GTPase activity); GO:0005525(molecular_function:GTP binding)	K17065	DNM1L	map04621(NOD-like receptor signaling pathway); map04217(Necroptosis); map04668(TNF signaling pathway); map04214(Apoptosis - fly)	COG0699(S:Function unknown)	COG0699(Heparan sulfate 2-o-sulfotransferase)	PF01031.21(Dynamin_M:Dynamin central region); PF00350.24(Dynamin_N:Dynamin family); PF02212.19(GED:Dynamin GTPase effector domain); PF01926.24(MMR_HSR1:50S ribosome-binding GTPase)	sp|Q7SXN5|DNM1L_DANRE(Dynamin-1-like protein OS=Danio rerio OX=7955 GN=dnm1l PE=2 SV=1)	114123267

## Sheet: DEGs wth signal peptides
gene_name	description	length	MA_1_count	MA_2_count	MA_3_count	CU_1_count	CU_2_count	CU_3_count	MA_1_tpm	MA_2_tpm	MA_3_tpm	CU_1_tpm	CU_2_tpm	CU_3_tpm	MA_tpm	CU_tpm	fc	log2fc	pvalue	padjust	significant	regulate	nr	go	KO_id	KO_name	paths	cog	cog_description	pfam	swissprot	entrez
LOC114119891	uncharacterized LOC114119891	1316	469	438	511	1132	1530	797	22.93	18.66	27.19	52.12	74.47	39.75	22.9267	55.4467	2.21905	1.14994	7.21e-06	0.000210862	yes	up	XP_027837426.1(uncharacterized protein LOC114119891 [Aphis gossypii])	0	0	0	0	ENOG410Z9TD(S:Function unknown)	ENOG410Z9TD(-)	0	0	114119891
LOC114120705	uncharacterized LOC114120705	1439	2372	2591	1811	1339	1308	904	103.51	98.7	86.11	55.04	56.84	40.25	96.1067	50.71	0.481407	-1.05467	1.98e-06	6.58e-05	yes	down	XP_027838502.1(uncharacterized protein LOC114120705 [Aphis gossypii])	GO:0016021(cellular_component:integral component of membrane)	0	0	0	ENOG4111U4E(S:Function unknown)	ENOG4111U4E(-)	0	0	114120705
LOC114128251	putative nuclease HARBI1	657	11	8	3	0	1	0	1.52	0.93	0.44	0	0.14	0	0.963333	0.0466667	0.0440061	-4.50615	0.00476145	0.0481393	yes	down	XP_027848531.1(putative nuclease HARBI1 [Aphis gossypii])	0	K23222	HARBI1	0	ENOG411206Y(S:Function unknown); ENOG410Z2MW(S:Function unknown); COG0507(S:Function unknown); ENOG410XZQD(S:Function unknown)	ENOG411206Y(transposon protein); ENOG410Z2MW(-); COG0507(transposon protein); ENOG410XZQD(-)	PF04827.15(Plant_tran:Plant transposon protein); PF13359.7(DDE_Tnp_4:DDE superfamily endonuclease); PF13613.7(HTH_Tnp_4:Helix-turn-helix of DDE superfamily endonuclease)	sp|Q6AZB8|HARB1_DANRE(Putative nuclease HARBI1 OS=Danio rerio OX=7955 GN=harbi1 PE=2 SV=1)	114128251
LOC114128793	uncharacterized LOC114128793	611	217.48	283.7	322	100.56	166.91	94.43	33.14	37.43	53.55	14.42	25.01	14.49	41.3733	17.9733	0.401185	-1.31766	1.68e-06	5.68e-05	yes	down	XP_027849180.1(uncharacterized protein LOC114128793 [Aphis gossypii])	0	0	0	0	0	0	0	0	114128793
LOC114129751	uncharacterized LOC114129751	741	1143	1637	1282	614	677	439	128.14	156.62	154.27	64.52	75.37	50.04	146.343	63.31	0.393071	-1.34714	1.1e-10	7.85e-09	yes	down	XP_027850383.1(uncharacterized protein LOC114129751 [Aphis gossypii])	GO:0042302(molecular_function:structural constituent of cuticle)	0	0	0	0	0	PF00379.24(Chitin_bind_4:Insect cuticle protein)	0	114129751
LOC114129833	esterase E4-like	1978	784.91	977.25	971.79	372.64	432.71	361.87	24.23	26.53	32.95	10.74	13.18	11.18	27.9033	11.7	0.389736	-1.35943	5.61e-18	8.36e-16	yes	down	XP_027850482.1(esterase E4-like [Aphis gossypii])	GO:0016787(molecular_function:hydrolase activity); GO:0080030(molecular_function:methyl indole-3-acetate esterase activity)	0	0	0	COG2272(I:Lipid transport and metabolism)	COG2272(Carboxylesterase)	PF00135.29(COesterase:Carboxylesterase family); PF07859.14(Abhydrolase_3:alpha/beta hydrolase fold)	sp|P35502|ESTF_MYZPE(Esterase FE4 OS=Myzus persicae OX=13164 PE=1 SV=1)	114129833
LOC114131096	uncharacterized LOC114131096	1949	290	409	406	17	37	28	8.75	10.83	13.39	0.75	1.84	1.39	10.99	1.32667	0.0674654	-3.88971	3.08e-45	2.08e-42	yes	down	XP_027852041.1(uncharacterized protein LOC114131096 [Aphis gossypii])	0	0	0	0	0	0	0	0	114131096
LOC114132207	uclacyanin-3	468	260	241	282	758	839	578	74.11	55.54	83	199.49	234.39	166.71	70.8833	200.197	2.52655	1.33717	1.35e-09	8.08e-08	yes	up	XP_027853404.1(uclacyanin-3 [Aphis gossypii])	0	0	0	0	0	0	0	0	114132207
LOC114132214	uncharacterized LOC114132214	2441	223	184	303	153	105	108	5.19	3.76	7.72	3.36	2.44	2.57	5.55667	2.79	0.468041	-1.09529	0.000257228	0.00456296	yes	down	XP_027853415.1(uncharacterized protein LOC114132214 [Aphis gossypii])	0	0	0	0	ENOG410YRBN(S:Function unknown); ENOG41120RA(S:Function unknown); ENOG410YX73(S:Function unknown)	ENOG410YRBN(-); ENOG41120RA(-); ENOG410YX73(-)	PF16009.6(DUF4779:Domain of unknown function (DUF4779))	0	114132214
LOC114132272	maltase 2-like	2120	334.62	334.06	520.39	2113.6	2590.88	1580	7.81	6.65	13.5	46.59	60.23	37.16	9.32	47.9933	4.80704	2.26515	3e-18	4.7e-16	yes	up	XP_027853483.1(maltase 2-like [Aphis gossypii])	GO:0003824(molecular_function:catalytic activity); GO:0005975(biological_process:carbohydrate metabolic process)	0	0	0	COG0366(G:Carbohydrate transport and metabolism)	COG0366(alpha amylase, catalytic)	PF00128.25(Alpha-amylase:Alpha amylase, catalytic domain)	sp|O16098|MAL1_DROVI(Maltase 1 OS=Drosophila virilis OX=7244 GN=Mal-B1 PE=3 SV=2)	114132272
LOC114132278	maltase 2-like	1928	316.38	497.94	450.61	2061.4	2741.12	1709	9.66	13.35	15.01	59.28	83.23	53.08	12.6733	65.1967	4.73883	2.24453	2.67e-24	6.95e-22	yes	up	XP_027853491.1(LOW QUALITY PROTEIN: maltase 2-like [Aphis gossypii])	GO:0003824(molecular_function:catalytic activity); GO:0005975(biological_process:carbohydrate metabolic process)	0	0	0	COG0366(G:Carbohydrate transport and metabolism)	COG0366(alpha amylase, catalytic)	PF00128.25(Alpha-amylase:Alpha amylase, catalytic domain)	sp|O16099|MAL2_DROVI(Maltase 2 OS=Drosophila virilis OX=7244 GN=Mal-B2 PE=3 SV=2)	114132278
LOC114132390	uncharacterized LOC114132390	1253	609.57	871.39	772.51	0	0	32.77	31.76	39.52	43.78	0	0	1.74	38.3533	0.58	0.0125792	-6.31282	0.00390967	0.0416971	yes	down	XP_027853642.1(uncharacterized protein LOC114132390 [Aphis gossypii])	0	0	0	0	0	0	0	0	114132390
LOC114132470	cuticle protein 7-like	1183	495	304	338	152	97	245	22.56	11.49	16.16	6.52	4.39	11.01	16.7367	7.30667	0.384557	-1.37873	5.02e-05	0.00114197	yes	down	XP_027853734.1(cuticle protein 7-like [Aphis gossypii])	GO:0042302(molecular_function:structural constituent of cuticle)	0	0	0	ENOG410YXZN(S:Function unknown); ENOG410YXTN(S:Function unknown)	ENOG410YXZN(Cuticular protein); ENOG410YXTN(Cuticular protein)	PF00379.24(Chitin_bind_4:Insect cuticle protein)	sp|P11734|CU08_LOCMI(Cuticle protein 8 OS=Locusta migratoria OX=7004 PE=1 SV=1)	114132470
LOC114132521	esterase E4-like, transcript variant X1	1825	106.35	33.31	92.15	178.34	139.51	339.06	3.6	1	3.38	5.57	4.64	11.52	2.66	7.24333	2.47283	1.30616	0.00399024	0.0421642	yes	up	XP_027853797.1(esterase E4-like [Aphis gossypii])	0	K01050;K01049	BCHE;ACHE	map00564(Glycerophospholipid metabolism); map04725(Cholinergic synapse)	COG2272(I:Lipid transport and metabolism)	COG2272(Carboxylesterase)	PF00135.29(COesterase:Carboxylesterase family)	sp|P35502|ESTF_MYZPE(Esterase FE4 OS=Myzus persicae OX=13164 PE=1 SV=1)	114132521
LOC114132550	uncharacterized LOC114132550	1509	378.02	276.09	237.03	1758.14	1603.03	1877.84	15.54	9.92	10.63	68.12	65.66	78.79	12.03	70.8567	5.28732	2.40254	1.16e-27	3.71e-25	yes	up	XP_027853838.1(uncharacterized protein LOC114132550 [Aphis gossypii])	GO:0016021(cellular_component:integral component of membrane); GO:0005576(cellular_component:extracellular region)	0	0	0	0	0	PF13930.7(Endonuclea_NS_2:DNA/RNA non-specific endonuclease); PF00030.20(Crystall:Beta/Gamma crystallin)	0	114132550
LOC114132551	uncharacterized LOC114132551	1555	551.98	701.91	507.97	49.86	43.97	46.16	20.5	22.38	20.55	1.17	1.09	1.17	21.1433	1.14333	0.0726676	-3.78254	8.36e-73	4.79e-69	yes	down	XP_027853840.1(uncharacterized protein LOC114132551 [Aphis gossypii])	GO:0016021(cellular_component:integral component of membrane); GO:0005576(cellular_component:extracellular region)	0	0	0	0	0	PF13930.7(Endonuclea_NS_2:DNA/RNA non-specific endonuclease); PF00030.20(Crystall:Beta/Gamma crystallin)	0	114132551
LOC114119136	ATP-dependent DNA helicase PIF1-like	2130	83.55	64.16	88.69	0	0	5.44	2.28	1.53	2.65	0	0	0.15	2.15333	0.05	0.0187461	-5.73727	8.87e-14	8.93e-12	yes	down	XP_027836417.1(ATP-dependent DNA helicase PIF1-like [Aphis gossypii])	GO:0006310(biological_process:DNA recombination); GO:0000723(biological_process:telomere maintenance); GO:0000002(biological_process:mitochondrial genome maintenance); GO:0006281(biological_process:DNA repair); GO:0005634(cellular_component:nucleus); GO:0005739(cellular_component:mitochondrion); GO:0003677(molecular_function:DNA binding); GO:0003678(molecular_function:DNA helicase activity); GO:0…	K15255	PIF1	0	COG0507(L:Replication, recombination and repair)	COG0507(exodeoxyribonuclease v alpha)	PF05970.15(PIF1:PIF1-like helicase); PF13604.7(AAA_30:AAA domain); PF13245.7(AAA_19:AAA domain); PF01443.19(Viral_helicase1:Viral (Superfamily 1) RNA helicase); PF13538.7(UvrD_C_2:UvrD-like helicase C-terminal domain); PF13401.7(AAA_22:AAA domain); PF02562.17(PhoH:PhoH-like protein); PF00004.30(AAA:ATPase family associated with various cellular activities (AAA))	sp|Q7ZV90|PIF1_DANRE(ATP-dependent DNA helicase PIF1 OS=Danio rerio OX=7955 GN=pif1 PE=2 SV=1)	114119136
LOC114119210	hepatic triacylglycerol lipase-like, transcript variant X1	1476	126	111	99	5	8	3	8.01	6.31	6.83	0.3	0.55	0.2	7.05	0.35	0.0430858	-4.53664	1.4e-21	2.91e-19	yes	down	XP_027836503.1(lipase member H-B-like isoform X1 [Aphis gossypii])	GO:0005576(cellular_component:extracellular region); GO:0006629(biological_process:lipid metabolic process); GO:0052689(molecular_function:carboxylic ester hydrolase activity)	K22283	LIPC	map04979(Cholesterol metabolism); map00561(Glycerolipid metabolism)	ENOG4111JY5(S:Function unknown)	ENOG4111JY5(Lipase)	PF00151.20(Lipase:Lipase)	sp|Q641F6|LIPHB_XENLA(Lipase member H-B OS=Xenopus laevis OX=8355 GN=liph-b PE=2 SV=1)	114119210
LOC114119367	chorion peroxidase-like	2509	841	392	555	247	110	237	18.96	7.77	13.7	5.26	2.47	5.46	13.4767	4.39667	0.295614	-1.75821	2.27e-06	7.47e-05	yes	down	XP_027836693.1(chorion peroxidase-like [Aphis gossypii])	GO:0004601(molecular_function:peroxidase activity); GO:0020037(molecular_function:heme binding); GO:0006979(biological_process:response to oxidative stress)	K19511	PXDN, VPO1	0	ENOG410XPZ3(S:Function unknown)	ENOG410XPZ3(Zinc finger protein)	PF03098.16(An_peroxidase:Animal haem peroxidase)	sp|A4IGL7|PXDN_XENTR(Peroxidasin OS=Xenopus tropicalis OX=8364 GN=pxdn PE=2 SV=1)	114119367
LOC114120137	adhesive plaque matrix protein-like, transcript variant X1	572	74086	97219	80238	29911	25929	23070	13329.6	14586.5	15262.2	5010.95	4604.64	4214.16	14392.8	4609.92	0.288811	-1.7918	3.29e-27	9.93e-25	yes	down	XP_027837752.1(adhesive plaque matrix protein-like isoform X1 [Aphis gossypii])	0	0	0	0	0	0	0	0	114120137
LOC114120244	uncharacterized LOC114120244	1097	61	143	89	48	10	43	3.8	7.72	6.01	2.81	0.62	2.73	5.84333	2.05333	0.322304	-1.63351	0.00132136	0.0176979	yes	down	XP_027837900.1(uncharacterized protein LOC114120244 [Aphis gossypii])	0	0	0	0	0	0	0	0	114120244
LOC114120395	keratin-associated protein 6-2-like	908	35302	38573	39369	19866	18774	13004	2838.08	2684.38	3422.6	1505.79	1503.51	1069.64	2981.69	1359.65	0.418247	-1.25757	9.12e-10	5.71e-08	yes	down	KAE9538116.1(hypothetical protein AGLY_006088, partial [Aphis glycines])	0	0	0	0	0	0	0	0	114120395
LOC114120773	BCL-6 corepressor-like protein 1	1992	74013.7	90982.7	75267.3	22550.1	32850.2	26491.7	2098.6	2298.58	2324.69	608.13	938.36	785.56	2240.62	777.35	0.310082	-1.68928	6.16e-29	2.14e-26	yes	down	XP_027838598.1(BCL-6 corepressor-like protein 1 [Aphis gossypii])	0	0	0	0	ENOG4111M7J(S:Function unknown); ENOG410Y20T(S:Function unknown)	ENOG4111M7J(Cuticular protein); ENOG410Y20T(-)	0	0	114120773
LOC114120824	protein transport protein sec31-like	2215	117232	156607	134132	58260.4	51158	43455.2	3048.3	3576.69	3815.4	1429.26	1326.23	1153.63	3480.13	1303.04	0.345259	-1.53425	7.6e-19	1.32e-16	yes	down	XP_027838670.1(protein transport protein sec31-like [Aphis gossypii])	0	0	0	0	ENOG4111M7J(S:Function unknown); ENOG410Y20T(S:Function unknown)	ENOG4111M7J(Cuticular protein); ENOG410Y20T(-)	0	0	114120824
LOC114120825	uncharacterized LOC114120825	2263	7163.18	3042.11	7025.52	1365.15	1117.48	880.75	83.7	31.38	90.09	15.07	13.03	10.51	68.39	12.87	0.174609	-2.5178	1.17e-13	1.17e-11	yes	down	XP_027838671.1(uncharacterized protein LOC114120825 [Aphis gossypii])	0	0	0	0	ENOG4111M7J(S:Function unknown)	ENOG4111M7J(Cuticular protein)	PF16619.6(SUIM_assoc:Unstructured region C-term to UIM in Ataxin3)	0	114120825
LOC114120903	cuticle protein 63-like	554	402	1479	345	48348	10959	184	77.32	236.3	69.96	8649.94	2078.81	35.92	127.86	3588.22	26.9468	4.75204	0.00299181	0.0340288	yes	up	XP_027838791.1(cuticle protein 63-like [Aphis gossypii])	0	0	0	0	0	0	0	0	114120903
LOC114121275	uncharacterized LOC114121275	1613	755	896	856	474	396	379	28.6	29.69	35.37	16.92	14.94	14.65	31.22	15.5033	0.456249	-1.13211	9.77e-11	7.05e-09	yes	down	XP_027839330.1(uncharacterized protein LOC114121275 [Aphis gossypii])	0	0	0	0	ENOG410Z2PV(S:Function unknown)	ENOG410Z2PV(-)	PF00431.21(CUB:CUB domain)	0	114121275
LOC114121295	cathepsin B-like	1090	56770	102685	57262	35899	39282	39579	3310.01	5152.62	3612.67	1961.02	2284.28	2339.89	4025.1	2195.06	0.489628	-1.03024	5.79e-08	2.66e-06	yes	down	XP_027839358.1(cathepsin B-like [Aphis gossypii])	GO:0004197(molecular_function:cysteine-type endopeptidase activity); GO:0050790(biological_process:regulation of catalytic activity)	K01363	CTSB	map04142(Lysosome); map04621(NOD-like receptor signaling pathway); map04924(Renin secretion); map04210(Apoptosis); map04612(Antigen processing and presentation); map04140(Autophagy - animal)	COG4870(O:Posttranslational modification, protein turnover, chaperones)	COG4870(cathepsin)	PF00112.24(Peptidase_C1:Papain family cysteine protease); PF08127.14(Propeptide_C1:Peptidase family C1 propeptide)	sp|P00787|CATB_RAT(Cathepsin B OS=Rattus norvegicus OX=10116 GN=Ctsb PE=1 SV=2)	114121295
LOC114121369	neutral alpha-glucosidase AB	3579	7262	8889	8359	2550	2799	3425	110.4	119.14	139.36	36.61	42.46	53.18	122.967	44.0833	0.324524	-1.6236	5.66e-41	3.25e-38	yes	down	XP_027839470.1(neutral alpha-glucosidase AB [Aphis gossypii])	GO:0005975(biological_process:carbohydrate metabolic process); GO:0030246(molecular_function:carbohydrate binding); GO:0004553(molecular_function:hydrolase activity, hydrolyzing O-glycosyl compounds)	K05546	GANAB	map00510(N-Glycan biosynthesis); map04141(Protein processing in endoplasmic reticulum)	COG1501(G:Carbohydrate transport and metabolism)	COG1501(hydrolase, family 31)	PF01055.27(Glyco_hydro_31:Glycosyl hydrolases family 31); PF13802.7(Gal_mutarotas_2:Galactose mutarotase-like)	sp|Q8BHN3|GANAB_MOUSE(Neutral alpha-glucosidase AB OS=Mus musculus OX=10090 GN=Ganab PE=1 SV=1)	114121369
LOC114121563	adhesive plaque matrix protein-like	687	18101.5	24644	20809	6994	6044.39	3837	2304.09	2661.05	2832.63	825.9	756.11	492.56	2599.26	691.523	0.246222	-2.02197	2.55e-17	3.61e-15	yes	down	XP_027839775.1(adhesive plaque matrix protein-like [Aphis gossypii])	0	0	0	0	ENOG410Z4TZ(S:Function unknown)	ENOG410Z4TZ(-)	0	0	114121563
LOC114121830	uncharacterized LOC114121830	670	358	326	219	985	1006	870	44.16	35.01	28.83	119.56	126.38	114.15	36	120.03	2.8798	1.52597	8.1e-12	6.68e-10	yes	up	XP_027840110.1(uncharacterized protein LOC114121830 [Aphis gossypii])	0	0	0	0	ENOG410Y7NC(S:Function unknown); ENOG41120FQ(S:Function unknown); ENOG410Z6E3(S:Function unknown); ENOG410Y8DA(S:Function unknown)	ENOG410Y7NC(-); ENOG41120FQ(-); ENOG410Z6E3(-); ENOG410Y8DA(Juvenile hormone-inducible protein)	0	0	114121830
LOC114121902	flocculation protein FLO11-like	1199	2000	2420	3011	1360	1163	1137	110.44	116.19	180.7	70.67	63.91	64.03	135.777	66.2033	0.450185	-1.15141	4.1e-09	2.29e-07	yes	down	XP_027840199.1(flocculation protein FLO11-like [Aphis gossypii])	0	K03006	RPB1, POLR2A	map03020(RNA polymerase); map05016(Huntington disease)	0	0	0	0	114121902
LOC114122139	basic-leucine zipper transcription factor A-like	2500	136	80	129	49	10	39	3.08	1.59	3.2	1.05	0.23	0.9	2.62333	0.726667	0.255822	-1.96679	9.49e-05	0.00194969	yes	down	XP_027840510.1(LOW QUALITY PROTEIN: basic-leucine zipper transcription factor A-like [Aphis gossypii])	0	0	0	0	0	0	0	0	114122139
LOC114122166	lipase member H-B-like	1406	0	0	0	29.1	89.08	16.38	0	0	0	1.23	3.99	0.75	0	1.99	221.456	7.79088	2.07e-08	1.04e-06	yes	up	XP_027840554.1(lipase member H-B-like [Aphis gossypii])	GO:0005576(cellular_component:extracellular region); GO:0006629(biological_process:lipid metabolic process); GO:0052689(molecular_function:carboxylic ester hydrolase activity)	K19404	LIPH_I	0	ENOG4111JY5(S:Function unknown); ENOG410YGS3(S:Function unknown)	ENOG4111JY5(Lipase); ENOG410YGS3(pancreatic triacylglycerol lipase)	PF00151.20(Lipase:Lipase)	sp|Q641F6|LIPHB_XENLA(Lipase member H-B OS=Xenopus laevis OX=8355 GN=liph-b PE=2 SV=1)	114122166
LOC114122190	cuticle protein 16.5-like	758	38438	49667	44299	15475	15442	11087	4143.24	4572.06	5128.91	1562.7	1650.64	1216.43	4614.74	1476.59	0.291973	-1.77609	1.13e-21	2.41e-19	yes	down	XP_027840582.1(cuticle protein 16.5-like [Aphis gossypii])	0	0	0	0	ENOG410XZE7(S:Function unknown)	ENOG410XZE7(-)	0	0	114122190
LOC114122217	transcriptional regulatory protein AlgP-like	1618	20011	28717	28213	15830	11619	12293	755.1	947.89	1161.53	562.99	436.78	473.38	954.84	491.05	0.476185	-1.07041	3.58e-08	1.75e-06	yes	down	KAE9523627.1(hypothetical protein AGLY_016179 [Aphis glycines])	0	0	0	0	0	0	0	0	114122217
LOC114122234	cathepsin B-like cysteine proteinase 3	1373	1591	1839	1267	595	521	1249	71.98	73.69	63.19	25.67	23.89	58.75	69.62	36.1033	0.451776	-1.14632	4.71e-05	0.00107481	yes	down	XP_027840634.1(cathepsin B-like cysteine proteinase 3 [Aphis gossypii])	GO:0008234(molecular_function:cysteine-type peptidase activity)	clec;K01363	;CTSB	map04142(Lysosome); map04621(NOD-like receptor signaling pathway); map04924(Renin secretion); map04210(Apoptosis); map04612(Antigen processing and presentation); map04140(Autophagy - animal)	COG4870(F:Nucleotide transport and metabolism)	COG4870(Dihydroorotase)	PF00112.24(Peptidase_C1:Papain family cysteine protease)	sp|P43508|CPR4_CAEEL(Cathepsin B-like cysteine proteinase 4 OS=Caenorhabditis elegans OX=6239 GN=cpr-4 PE=1 SV=1)	114122234
LOC114123067	zinc metalloproteinase nas-13-like	1218	470	390	465	203	231	216	25.42	18.35	27.34	10.33	12.43	11.91	23.7033	11.5567	0.441949	-1.17805	2.88e-09	1.65e-07	yes	down	XP_027841730.1(zinc metalloproteinase nas-13-like [Aphis gossypii])	GO:0004222(molecular_function:metalloendopeptidase activity); GO:0008270(molecular_function:zinc ion binding)	0	0	0	ENOG410ZPX7(S:Function unknown)	ENOG410ZPX7(Reverse transcriptase (RNA-dependent DNA polymerase))	PF01400.25(Astacin:Astacin (Peptidase family M12A))	sp|Q20191|NAS13_CAEEL(Zinc metalloproteinase nas-13 OS=Caenorhabditis elegans OX=6239 GN=nas-13 PE=2 SV=5)	114123067
LOC114123074	early nodulin-75-like	1201	490	307	323	155	77	265	35.59	21.46	24.63	15.59	6.41	29.79	27.2267	17.2633	0.39224	-1.35019	0.000471088	0.00745997	yes	down	XP_027841736.1(LOW QUALITY PROTEIN: early nodulin-75-like [Aphis gossypii])	0	0	0	0	0	0	0	0	114123074
LOC114123108	uncharacterized LOC114123108	503	125	106	115	12	7	17	24.3	18.94	24.77	2.09	1.44	3.49	22.67	2.34	0.0935362	-3.41833	1.21e-18	2.07e-16	yes	down	XP_027841773.1(uncharacterized protein LOC114123108 [Aphis gossypii])	0	0	0	0	0	0	0	0	114123108
LOC114123883	pancreatic triacylglycerol lipase-like	1395	12249.2	14445.4	8974.43	5559.28	5013.09	5701.59	558.32	574.64	445.56	238.82	227.7	265.46	526.173	243.993	0.416953	-1.26204	8.58e-13	7.75e-11	yes	down	XP_027842819.1(pancreatic triacylglycerol lipase-like [Aphis gossypii])	GO:0005576(cellular_component:extracellular region); GO:0006629(biological_process:lipid metabolic process); GO:0052689(molecular_function:carboxylic ester hydrolase activity)	0	0	0	ENOG410YGS3(S:Function unknown); ENOG4111JY5(S:Function unknown)	ENOG410YGS3(pancreatic triacylglycerol lipase); ENOG4111JY5(Lipase)	PF00151.20(Lipase:Lipase); PF02230.17(Abhydrolase_2:Phospholipase/Carboxylesterase)	sp|P29183|LIPP_HORSE(Pancreatic triacylglycerol lipase (Fragment) OS=Equus caballus OX=9796 GN=PNLIP PE=1 SV=2)	114123883
LOC114123901	lipase member H-A-like	941	648	1191	559	2488	2323	2584	50.07	79.41	46.71	180.57	178.35	203.46	58.73	187.46	2.86058	1.51631	2.56e-11	1.93e-09	yes	up	XP_027842839.1(lipase member H-A-like [Aphis gossypii])	GO:0016021(cellular_component:integral component of membrane); GO:0005576(cellular_component:extracellular region); GO:0006629(biological_process:lipid metabolic process); GO:0052689(molecular_function:carboxylic ester hydrolase activity)	K14075;K14074;K19404	PNLIPRP2, PLRP2;PNLIPRP1, PLRP1;LIPH_I	map04972(Pancreatic secretion); map00561(Glycerolipid metabolism); map04975(Fat digestion and absorption)	ENOG410YGS3(S:Function unknown); ENOG4111AHY(O:Posttranslational modification, protein turnover, chaperones)	ENOG410YGS3(pancreatic triacylglycerol lipase); ENOG4111AHY(lipase member)	PF00151.20(Lipase:Lipase); PF00561.21(Abhydrolase_1:alpha/beta hydrolase fold); PF12697.8(Abhydrolase_6:Alpha/beta hydrolase family)	sp|Q6PA23|LIPHA_XENLA(Lipase member H-A OS=Xenopus laevis OX=8355 GN=liph-a PE=2 SV=1)	114123901
LOC114123911	agrin, transcript variant X1	2703	2774.69	5469.83	2720.36	2508.39	1335.74	1157.09	57.53	99.79	61.77	49.21	27.62	24.5	73.03	33.7767	0.432291	-1.20992	0.000231713	0.00417703	yes	down	XP_027842850.1(agrin isoform X1 [Aphis gossypii])	0	0	0	0	ENOG410ZXUD(S:Function unknown); ENOG410YKSA(O:Posttranslational modification, protein turnover, chaperones)	ENOG410ZXUD(Kazal-type serine protease inhibitor domain); ENOG410YKSA(K06254 agrin)	PF07648.16(Kazal_2:Kazal-type serine protease inhibitor domain); PF00050.22(Kazal_1:Kazal-type serine protease inhibitor domain)	sp|P25304|AGRIN_RAT(Agrin OS=Rattus norvegicus OX=10116 GN=Agrn PE=1 SV=2)	114123911
LOC114124125	serine protease lint-like	3734	310	446.54	445.99	217.59	175.52	190.62	4.5	5.72	7.1	2.98	2.54	2.83	5.77333	2.78333	0.446312	-1.16388	1.48e-08	7.44e-07	yes	down	XP_027843110.1(serine protease lint-like [Aphis gossypii])	GO:0004252(molecular_function:serine-type endopeptidase activity)	0	0	0	COG5640(O:Posttranslational modification, protein turnover, chaperones)	COG5640(protease)	PF00089.27(Trypsin:Trypsin)	sp|B7YZU2|LINT_DROME(Serine protease filzig OS=Drosophila melanogaster OX=7227 GN=flz PE=2 SV=1)	114124125
LOC114124204	uncharacterized LOC114124204	779	0	0	0	260.09	315.45	296.42	0	0	0	21.36	28.68	26.8	0	25.6133	1431.49	10.4833	2.04e-18	3.34e-16	yes	up	XP_027843194.1(uncharacterized protein LOC114124203 [Aphis gossypii])	0	0	0	0	ENOG410YV20(S:Function unknown)	ENOG410YV20(C1q-like venom protein)	PF00386.22(C1q:C1q domain)	0	114124204
LOC114124338	gamma-glutamyl hydrolase-like, transcript variant X1	1238	135.91	92.53	92.1	22.89	27.05	12.66	27.16	15.65	14.88	7.67	8.59	1.54	19.23	5.93333	0.177277	-2.49592	3.9e-10	2.63e-08	yes	down	XP_027843366.1(gamma-glutamyl hydrolase-like isoform X1 [Aphis gossypii])	GO:0034722(molecular_function:gamma-glutamyl-peptidase activity)	K01307	GGH	map01523(Antifolate resistance); map00790(Folate biosynthesis)	ENOG410XQKI(S:Function unknown)	ENOG410XQKI(Gamma-glutamyl hydrolase)	PF07722.14(Peptidase_C26:Peptidase C26); PF00117.29(GATase:Glutamine amidotransferase class-I)	sp|Q9Z0L8|GGH_MOUSE(Gamma-glutamyl hydrolase OS=Mus musculus OX=10090 GN=Ggh PE=1 SV=2)	114124338
LOC114124708	proteoglycan 4-like	916	1436	1212	1296	528	384	552	115.42	83.97	112.57	39.85	30.66	45.21	103.987	38.5733	0.334939	-1.57803	1.21e-14	1.36e-12	yes	down	XP_027843855.1(proteoglycan 4-like [Aphis gossypii])	0	0	0	0	0	0	0	0	114124708
LOC114124991	regulator of nonsense transcripts 1-like	1208	712	1483	471	1660	2048	2461	38.93	70.51	27.99	85.42	111.43	137.23	45.81	111.36	2.14507	1.10102	0.000340848	0.00572034	yes	up	XP_027844260.1(regulator of nonsense transcripts 1-like [Aphis gossypii])	0	0	0	0	0	0	0	0	114124991
LOC114125039	uncharacterized LOC114125039	642	40	56	42	22	24	21	5.75	6.79	6.43	2.95	3.41	3.07	6.32333	3.14333	0.44456	-1.16955	0.00182979	0.0229273	yes	down	XP_027844315.1(uncharacterized protein LOC114125039 [Aphis gossypii])	0	0	0	0	0	0	0	0	114125039
LOC114125125	uncharacterized LOC114125125	1590	5622.88	7605.89	9843.92	3974.95	3570	3303	216.76	256.41	413.96	144.41	137.1	129.94	295.71	137.15	0.430706	-1.21522	1.23e-08	6.34e-07	yes	down	XP_027844436.1(uncharacterized protein LOC114125125 [Aphis gossypii])	0	0	0	0	0	0	0	0	114125125
LOC114125129	uncharacterized LOC114125129, transcript variant X1	2590	3288.82	2356.05	4240.9	1630.46	1738.38	1699	96.2	59.86	136.22	43.56	49.49	48.31	97.4267	47.12	0.459411	-1.12214	2.27e-06	7.47e-05	yes	down	XP_027844441.1(uncharacterized protein LOC114125129 isoform X1 [Aphis gossypii])	0	0	0	0	0	0	PF15999.6(DUF4774:Domain of unknown function (DUF4774))	0	114125129
LOC114125131	prisilkin-39-like, transcript variant X1	1015	40427	58671	50420	20280	17833	7743	3306.06	4291.33	4715.47	1505.38	1395.73	614.29	4104.29	1171.8	0.286405	-1.80387	1.01e-08	5.24e-07	yes	down	XP_027844445.1(prisilkin-39-like isoform X1 [Aphis gossypii])	0	K03006	RPB1, POLR2A	map03020(RNA polymerase); map05016(Huntington disease)	0	0	0	0	114125131
LOC114125132	eyes absent homolog 1-like	1288	4085	9287	5417	4739	2753	2234	183.62	366.6	266.45	222.73	136.62	113.81	272.223	157.72	0.49112	-1.02585	0.00135886	0.0181366	yes	down	XP_027844448.1(eyes absent homolog 1-like [Aphis gossypii])	0	0	0	0	0	0	0	0	114125132
LOC114125186	astacin-like	1380	842	558	662	266	151	132	38.18	22.09	32.61	11.4	6.78	6.09	30.96	8.09	0.242453	-2.04422	2.86e-10	1.95e-08	yes	down	XP_027844523.1(astacin-like [Aphis gossypii])	GO:0004222(molecular_function:metalloendopeptidase activity); GO:0008270(molecular_function:zinc ion binding)	0	0	0	ENOG410ZPX7(O:Posttranslational modification, protein turnover, chaperones)	ENOG410ZPX7(Meprin A)	PF01400.25(Astacin:Astacin (Peptidase family M12A))	sp|Q19269|NAS14_CAEEL(Zinc metalloproteinase nas-14 OS=Caenorhabditis elegans OX=6239 GN=nas-14 PE=2 SV=2)	114125186
LOC114125358	myogenesis-regulating glycosidase-like	2041	14925.8	28698.6	13527.8	1491.09	965.32	2909.7	426.78	720.1	422.9	40.22	27.51	84.93	523.26	50.8867	0.0858981	-3.54123	4e-12	3.4e-10	yes	down	XP_027844774.1(myogenesis-regulating glycosidase-like [Aphis gossypii])	GO:0005975(biological_process:carbohydrate metabolic process); GO:0004553(molecular_function:hydrolase activity, hydrolyzing O-glycosyl compounds)	0	0	0	COG1501(G:Carbohydrate transport and metabolism)	COG1501(hydrolase, family 31)	PF01055.27(Glyco_hydro_31:Glycosyl hydrolases family 31); PF02065.19(Melibiase:Melibiase)	sp|Q6NSJ0|MYORG_HUMAN(Myogenesis-regulating glycosidase OS=Homo sapiens OX=9606 GN=MYORG PE=1 SV=2)	114125358
LOC114125451	esterase E4-like	2203	222	222	196	577	572	453	5.81	5.1	5.61	14.24	14.92	12.1	5.50667	13.7533	2.28414	1.19165	4.56e-09	2.54e-07	yes	up	XP_027844908.1(esterase E4-like [Aphis gossypii])	GO:0016787(molecular_function:hydrolase activity)	0	0	0	COG2272(I:Lipid transport and metabolism)	COG2272(Carboxylesterase)	PF00135.29(COesterase:Carboxylesterase family); PF07859.14(Abhydrolase_3:alpha/beta hydrolase fold)	sp|P35502|ESTF_MYZPE(Esterase FE4 OS=Myzus persicae OX=13164 PE=1 SV=1)	114125451
LOC114125471	cuticle protein 16.5-like	654	27371	28422	32709	8151	8827	4758	3803.9	3338.23	4849.24	1058.41	1214.05	672.3	3997.12	981.587	0.225006	-2.15196	4.74e-18	7.15e-16	yes	down	XP_027844937.1(cuticle protein 16.5-like [Aphis gossypii])	0	0	0	0	ENOG410Z4TZ(S:Function unknown)	ENOG410Z4TZ(-)	0	0	114125471
LOC114125576	esterase E4-like, transcript variant X1	2063	8732	14338	9743	5087	4365	5842	241.77	350.97	296.31	132.55	118.94	165.59	296.35	139.027	0.428726	-1.22187	1.14e-12	1.02e-10	yes	down	XP_027845094.1(esterase E4-like [Aphis gossypii])	GO:0016787(molecular_function:hydrolase activity)	K03927	CES2	map00983(Drug metabolism - other enzymes)	COG2272(S:Function unknown)	COG2272(-)	PF00135.29(COesterase:Carboxylesterase family); PF07859.14(Abhydrolase_3:alpha/beta hydrolase fold)	sp|P35502|ESTF_MYZPE(Esterase FE4 OS=Myzus persicae OX=13164 PE=1 SV=1)	114125576
LOC114125650	pro-resilin-like	568	205	154	171	705	923	253	37.42	23.43	32.98	119.81	166.28	46.89	31.2767	110.993	3.2398	1.69591	2.37e-05	0.000590486	yes	up	XP_027845197.1(pro-resilin-like [Aphis gossypii])	GO:0042302(molecular_function:structural constituent of cuticle)	0	0	0	ENOG410ZB5T(S:Function unknown); ENOG410XQTS(S:Function unknown); ENOG41128ZS(S:Function unknown)	ENOG410ZB5T(-); ENOG410XQTS(coiled-coil domain containing 65); ENOG41128ZS(Cuticular protein)	PF00379.24(Chitin_bind_4:Insect cuticle protein)	sp|Q9V7U0|RESIL_DROME(Pro-resilin OS=Drosophila melanogaster OX=7227 GN=resilin PE=1 SV=1)	114125650
LOC114125696	lysosomal Pro-X carboxypeptidase-like	1877	360	411	223	1333	1067	1264	10.47	10.67	6.65	37.27	31.63	39.3	9.26333	36.0667	3.37418	1.75454	1.69e-14	1.83e-12	yes	up	XP_027845263.1(lysosomal Pro-X carboxypeptidase-like [Aphis gossypii])	GO:0008236(molecular_function:serine-type peptidase activity)	K01285	PRCP	map04614(Renin-angiotensin system); map04974(Protein digestion and absorption)	ENOG410Y38A(S:Function unknown)	ENOG410Y38A(Lysosomal Pro-X)	PF05577.13(Peptidase_S28:Serine carboxypeptidase S28); PF12146.9(Hydrolase_4:Serine aminopeptidase, S33); PF00326.22(Peptidase_S9:Prolyl oligopeptidase family)	sp|Q7TMR0|PCP_MOUSE(Lysosomal Pro-X carboxypeptidase OS=Mus musculus OX=10090 GN=Prcp PE=1 SV=2)	114125696
LOC114125870	mucin-2-like	4908	1275	2299	3781	1313	969	937	13.89	22.1	45.19	13.43	10.47	10.36	27.06	11.42	0.403645	-1.30884	6.7e-05	0.0014576	yes	down	XP_027845463.1(mucin-2-like [Aphis gossypii])	GO:0005576(cellular_component:extracellular region); GO:0008061(molecular_function:chitin binding)	K00665	FASN	map04910(Insulin signaling pathway); map00061(Fatty acid biosynthesis); map04152(AMPK signaling pathway)	ENOG4111Q3Y(S:Function unknown); ENOG4111RTJ(O:Posttranslational modification, protein turnover, chaperones)	ENOG4111Q3Y(Prion protein); ENOG4111RTJ(Chitin binding Peritrophin-A domain)	PF01607.25(CBM_14:Chitin binding Peritrophin-A domain)	0	114125870
LOC114125916	endocuticle structural glycoprotein SgAbd-2-like, transcript variant X1	1069	56746	72413	61912	23219	22578	20897	3655.57	4044.55	4327.15	1407.82	1446	1372.73	4009.09	1408.85	0.319846	-1.64455	2.05e-36	9.81e-34	yes	down	XP_027845535.1(larval cuticle protein LCP-22-like isoform X1 [Aphis gossypii])	GO:0042302(molecular_function:structural constituent of cuticle)	0	0	0	ENOG4111PJ1(S:Function unknown)	ENOG4111PJ1(Cuticular protein)	PF00379.24(Chitin_bind_4:Insect cuticle protein)	sp|Q7M4F3|CUD2_SCHGR(Endocuticle structural glycoprotein SgAbd-2 OS=Schistocerca gregaria OX=7010 PE=1 SV=1)	114125916
LOC114126113	DNA-directed RNA polymerase II subunit RPB1-like	1496	31384	32346	29574	13778	11858	8492	1289.92	1163.01	1325.62	538.46	489.74	359.35	1259.52	462.517	0.3357	-1.57476	3.31e-13	3.06e-11	yes	down	XP_027845792.1(DNA-directed RNA polymerase II subunit RPB1-like [Aphis gossypii])	0	K03006	RPB1, POLR2A	map03020(RNA polymerase); map05016(Huntington disease)	ENOG410YXZN(S:Function unknown); ENOG410YXTN(S:Function unknown); ENOG410ZCN2(S:Function unknown)	ENOG410YXZN(Cuticular protein); ENOG410YXTN(Cuticular protein); ENOG410ZCN2(Insect cuticle protein)	PF00379.24(Chitin_bind_4:Insect cuticle protein)	sp|P45583|CU19_LOCMI(Cuticle protein 19 OS=Locusta migratoria OX=7004 PE=1 SV=1)	114126113
LOC114126114	cuticle protein 7-like	908	40090.3	36319.5	28711.9	108242	97897.6	48137.5	3217.45	2515.33	2489.24	7450.9	7020.06	3538.99	2740.67	6003.32	2.22427	1.15333	0.000119572	0.0023869	yes	up	XP_027845793.1(cuticle protein 7-like [Aphis gossypii])	GO:0042302(molecular_function:structural constituent of cuticle)	K03006	RPB1, POLR2A	map03020(RNA polymerase); map05016(Huntington disease)	ENOG410YXTN(S:Function unknown)	ENOG410YXTN(Cuticular protein)	PF00379.24(Chitin_bind_4:Insect cuticle protein)	sp|P11734|CU08_LOCMI(Cuticle protein 8 OS=Locusta migratoria OX=7004 PE=1 SV=1)	114126114
LOC114126120	cuticle protein 7-like	714	433.49	239.87	758.38	2.63	0	5.68	51.63	24.31	96.77	0.29	0	0.69	57.57	0.326667	0.00553611	-7.49691	1.93e-14	2.07e-12	yes	down	XP_025194369.1(LOW QUALITY PROTEIN: adhesive plaque matrix protein-like [Melanaphis sacchari])	GO:0042302(molecular_function:structural constituent of cuticle)	K03006	RPB1, POLR2A	map03020(RNA polymerase); map05016(Huntington disease)	ENOG410YXTN(S:Function unknown); ENOG410ZCN2(S:Function unknown)	ENOG410YXTN(Cuticular protein); ENOG410ZCN2(Insect cuticle protein)	PF00379.24(Chitin_bind_4:Insect cuticle protein)	sp|P45583|CU19_LOCMI(Cuticle protein 19 OS=Locusta migratoria OX=7004 PE=1 SV=1)	114126120
LOC114126124	cuticle protein 7-like	604	69.23	46.27	27.58	357	1023	1665.33	9.84	5.55	4.18	51.69	155.58	259.66	6.52333	155.643	18.5579	4.21396	4.78e-10	3.15e-08	yes	up	XP_027845807.1(cuticle protein 7-like [Aphis gossypii])	GO:0042302(molecular_function:structural constituent of cuticle)	0	0	0	ENOG410YXTN(S:Function unknown); ENOG410YXZN(S:Function unknown)	ENOG410YXTN(Cuticular protein); ENOG410YXZN(Cuticular protein)	PF00379.24(Chitin_bind_4:Insect cuticle protein)	sp|P11734|CU08_LOCMI(Cuticle protein 8 OS=Locusta migratoria OX=7004 PE=1 SV=1)	114126124
LOC114126125	cuticle protein 7-like	606	1379.77	1552.73	1268.17	0	0	24.67	221.26	208.96	216.11	0	0	4.02	215.443	1.34	0.00508706	-7.61895	0.000254012	0.00452212	yes	down	XP_027845809.1(cuticle protein 7-like [Aphis gossypii])	GO:0042302(molecular_function:structural constituent of cuticle)	0	0	0	ENOG410YXTN(S:Function unknown); ENOG410YXZN(S:Function unknown)	ENOG410YXTN(Cuticular protein); ENOG410YXZN(Cuticular protein)	PF00379.24(Chitin_bind_4:Insect cuticle protein)	sp|P11734|CU08_LOCMI(Cuticle protein 8 OS=Locusta migratoria OX=7004 PE=1 SV=1)	114126125
LOC114126128	cuticle protein 19-like	989	29	35.01	24.67	1106.27	968.65	20.01	2.09	2.18	1.92	74.77	69.25	1.47	2.06333	48.4967	22.2416	4.47519	0.000438789	0.00699683	yes	up	XP_027845812.1(cuticle protein 19-like [Aphis gossypii])	GO:0042302(molecular_function:structural constituent of cuticle)	0	0	0	ENOG410YRDB(S:Function unknown); ENOG410YXTN(S:Function unknown)	ENOG410YRDB(Cuticle protein); ENOG410YXTN(Cuticular protein)	PF00379.24(Chitin_bind_4:Insect cuticle protein)	sp|P27780|CUP8_DROME(Pupal cuticle protein Edg-84A OS=Drosophila melanogaster OX=7227 GN=Edg84A PE=2 SV=1)	114126128
LOC114126367	pupal cuticle protein Edg-84A-like	678	10	3	10	0	1	0	1.3	0.33	1.39	0	0.13	0	1.00667	0.0433333	0.0412734	-4.59864	0.00379164	0.0408563	yes	down	XP_027846105.1(pupal cuticle protein Edg-84A-like [Aphis gossypii])	GO:0042302(molecular_function:structural constituent of cuticle)	0	0	0	ENOG41115ER(S:Function unknown); ENOG410YRDB(S:Function unknown); ENOG4111VJY(S:Function unknown); ENOG41116Y9(S:Function unknown)	ENOG41115ER(Insect cuticle protein); ENOG410YRDB(Insect cuticle protein); ENOG4111VJY(Insect cuticle protein); ENOG41116Y9(Insect cuticle protein)	PF00379.24(Chitin_bind_4:Insect cuticle protein)	sp|P80683|CUA3A_TENMO(Larval cuticle protein A3A OS=Tenebrio molitor OX=7067 PE=1 SV=1)	114126367
LOC114126604	beta-galactosidase-like	2088	53.22	83.98	49.37	0	0	0	1.48	2.05	1.5	0	0	0	1.67667	0	0.00272993	-8.51692	8.3e-12	6.8e-10	yes	down	XP_027846387.1(beta-galactosidase-like [Aphis gossypii])	GO:0005975(biological_process:carbohydrate metabolic process); GO:0004565(molecular_function:beta-galactosidase activity)	K12309	GLB1, ELNR1	map00600(Sphingolipid metabolism); map00604(Glycosphingolipid biosynthesis - ganglio series); map00052(Galactose metabolism); map00511(Other glycan degradation); map00531(Glycosaminoglycan degradation); map04142(Lysosome)	COG1874(G:Carbohydrate transport and metabolism)	COG1874(beta-galactosidase)	PF01301.20(Glyco_hydro_35:Glycosyl hydrolases family 35); PF02449.16(Glyco_hydro_42:Beta-galactosidase); PF13364.7(BetaGal_dom4_5:Beta-galactosidase jelly roll domain)	sp|Q9TRY9|BGAL_CANLF(Beta-galactosidase OS=Canis lupus familiaris OX=9615 GN=GLB1 PE=1 SV=3)	114126604
LOC114126666	extensin-2-like	3958	493	516	640	308	184	165	6.93	6.41	9.86	4.02	2.54	2.34	7.73333	2.96667	0.366555	-1.4479	4.42e-07	1.68e-05	yes	down	XP_027846467.1(extensin-2-like [Aphis gossypii])	0	0	0	0	ENOG410ZQNU(S:Function unknown)	ENOG410ZQNU(-)	PF16058.6(Mucin-like:Mucin-like)	0	114126666
LOC114126671	cuticle protein 7-like	956	168	725	128	36640	18818	117	12.69	47.27	10.46	2599.3	1412.17	9	23.4733	1340.16	54.6101	5.7711	0.00037635	0.00619951	yes	up	XP_027846471.1(cuticle protein 7-like [Aphis gossypii])	GO:0042302(molecular_function:structural constituent of cuticle)	0	0	0	ENOG410YSFI(S:Function unknown)	ENOG410YSFI(cuticle protein)	PF00379.24(Chitin_bind_4:Insect cuticle protein)	sp|P82166|CU198_LOCMI(Cuticle protein 19.8 OS=Locusta migratoria OX=7004 PE=1 SV=1)	114126671
LOC114126988	cathepsin B-like	1143	3976	11747	4163	502	486	617	234.05	600.49	266.11	27.8	28.46	37.04	366.883	31.1	0.0758391	-3.72091	5.82e-32	2.22e-29	yes	down	XP_027846864.1(cathepsin B-like [Aphis gossypii])	GO:0004197(molecular_function:cysteine-type endopeptidase activity); GO:0050790(biological_process:regulation of catalytic activity)	K01363	CTSB	map04142(Lysosome); map04621(NOD-like receptor signaling pathway); map04924(Renin secretion); map04210(Apoptosis); map04612(Antigen processing and presentation); map04140(Autophagy - animal)	COG4870(O:Posttranslational modification, protein turnover, chaperones)	COG4870(cathepsin)	PF00112.24(Peptidase_C1:Papain family cysteine protease); PF08127.14(Propeptide_C1:Peptidase family C1 propeptide)	sp|P00787|CATB_RAT(Cathepsin B OS=Rattus norvegicus OX=10116 GN=Ctsb PE=1 SV=2)	114126988
LOC114127061	uncharacterized LOC114127061	740	152	198	143	63	53	80	48.63	50.44	45.62	17.99	16.58	25.66	48.23	20.0767	0.36229	-1.46478	3.12e-09	1.77e-07	yes	down	XP_027846969.1(uncharacterized protein LOC114127061 [Aphis gossypii])	0	0	0	0	0	0	0	0	114127061
LOC114127157	lachesin-like	1638	2	0	3	88	120.87	75.01	0.07	0	0.11	3.06	4.29	2.83	0.06	3.39333	51.5405	5.68763	2.1e-14	2.21e-12	yes	up	XP_027847105.1(lachesin-like [Aphis gossypii])	0	0	0	0	ENOG4110N31(S:Function unknown)	ENOG4110N31(IGc2)	PF13927.7(Ig_3:Immunoglobulin domain); PF07679.17(I-set:Immunoglobulin I-set domain); PF00047.26(ig:Immunoglobulin domain); PF13895.7(Ig_2:Immunoglobulin domain); PF07686.18(V-set:Immunoglobulin V-set domain)	sp|Q24372|LACH_DROME(Lachesin OS=Drosophila melanogaster OX=7227 GN=Lac PE=1 SV=2)	114127157
LOC114127468	uncharacterized LOC114127468	786	177	167	153	105	78	67	17.99	14.53	16.73	10	7.87	6.93	16.4167	8.26667	0.459679	-1.1213	5.43e-05	0.00121907	yes	down	XP_027847509.1(uncharacterized protein LOC114127468 [Aphis gossypii])	0	0	0	0	0	0	0	0	114127468
LOC114127488	uncharacterized LOC114127488, transcript variant X1	2352	286.24	333.73	273	204.15	124	91	7.53	7.74	7.92	5.02	3.23	2.46	7.73	3.57	0.435211	-1.20021	0.000136475	0.00268872	yes	down	XP_027847532.1(uncharacterized protein LOC114127488 isoform X1 [Aphis gossypii])	GO:0031151(molecular_function:histone methyltransferase activity (H3-K79 specific)); GO:0051726(biological_process:regulation of cell cycle)	0	0	0	0	0	0	0	114127488
LOC114127506	uncharacterized LOC114127506	670	35706	48956	37533	11505	9175.61	8595	4750.89	5515.93	5334.34	1431.02	1208.71	1162.99	5200.39	1267.57	0.221201	-2.17657	1.53e-33	6.52e-31	yes	down	XP_027847555.1(uncharacterized protein LOC114127506 [Aphis gossypii])	0	0	0	0	ENOG410Z4TZ(S:Function unknown)	ENOG410Z4TZ(-)	0	0	114127506
LOC114127611	maltase A1-like	2162	1339.96	1918.95	1130.53	506	721.53	894.39	40.13	49.62	38.62	12.12	17.8	23.43	42.79	17.7833	0.439216	-1.187	3.11e-08	1.53e-06	yes	down	XP_027847702.1(maltase A1-like [Aphis gossypii])	GO:0003824(molecular_function:catalytic activity); GO:0005975(biological_process:carbohydrate metabolic process)	0	0	0	COG0366(G:Carbohydrate transport and metabolism)	COG0366(alpha amylase, catalytic)	PF00128.25(Alpha-amylase:Alpha amylase, catalytic domain)	sp|O16099|MAL2_DROVI(Maltase 2 OS=Drosophila virilis OX=7244 GN=Mal-B2 PE=3 SV=2)	114127611
LOC114127615	maltase 1-like	638	220.39	385.22	254.89	124	125.11	155.56	20.27	29.74	25.77	12.54	13.31	16.95	25.26	14.2667	0.432635	-1.20878	3.87e-08	1.88e-06	yes	down	XP_027847705.1(maltase 1-like, partial [Aphis gossypii])	GO:0003824(molecular_function:catalytic activity); GO:0016021(cellular_component:integral component of membrane); GO:0005975(biological_process:carbohydrate metabolic process); GO:0016787(molecular_function:hydrolase activity)	K01187	malZ	map00500(Starch and sucrose metabolism); map00052(Galactose metabolism)	COG0366(G:Carbohydrate transport and metabolism)	COG0366(alpha amylase, catalytic)	PF00128.25(Alpha-amylase:Alpha amylase, catalytic domain); PF14701.7(hDGE_amylase:Glycogen debranching enzyme, glucanotransferase domain)	sp|O16098|MAL1_DROVI(Maltase 1 OS=Drosophila virilis OX=7244 GN=Mal-B1 PE=3 SV=2)	114127615
LOC114127950	flocculation protein FLO11-like	2348	9383	9393	12315	5061	4805	4092	228.18	200.74	327.74	116.13	116.51	101.6	252.22	111.413	0.408484	-1.29165	2.16e-11	1.65e-09	yes	down	XP_027848132.1(flocculation protein FLO11-like [Aphis gossypii])	GO:0005576(cellular_component:extracellular region); GO:0008061(molecular_function:chitin binding)	K06237	COL4A	map05165(Human papillomavirus infection); map04510(Focal adhesion); map05146(Amoebiasis); map04512(ECM-receptor interaction); map05200(Pathways in cancer); map04974(Protein digestion and absorption); map04933(AGE-RAGE signaling pathway in diabetic complications); map04926(Relaxin signaling pathway); map04151(PI3K-Akt signaling pathway); map05222(Small cell lung cancer)	ENOG410ZPH9(S:Function unknown); ENOG410XQ49(S:Function unknown); ENOG4111HJZ(S:Function unknown)	ENOG410ZPH9(Chitin binding Peritrophin-A domain); ENOG410XQ49(Chitin binding Peritrophin-A domain); ENOG4111HJZ(cuticular protein analogous to peritrophins 3-E)	PF01607.25(CBM_14:Chitin binding Peritrophin-A domain)	sp|O76217|PE1_ANOGA(Peritrophin-1 OS=Anopheles gambiae OX=7165 GN=Aper1 PE=2 SV=2)	114127950
LOC114128190	maltase 2-like, transcript variant X1	2063	1849.82	1410.64	1082.18	5672.21	8730	4631.79	51.12	33.72	31.78	148.59	241.2	129.88	38.8733	173.223	3.95643	1.9842	1.82e-12	1.62e-10	yes	up	XP_027848442.1(maltase 2-like [Aphis gossypii])	GO:0003824(molecular_function:catalytic activity); GO:0005975(biological_process:carbohydrate metabolic process)	K01187	malZ	map00500(Starch and sucrose metabolism); map00052(Galactose metabolism)	COG0366(G:Carbohydrate transport and metabolism)	COG0366(alpha amylase, catalytic)	PF00128.25(Alpha-amylase:Alpha amylase, catalytic domain)	sp|O16099|MAL2_DROVI(Maltase 2 OS=Drosophila virilis OX=7244 GN=Mal-B2 PE=3 SV=2)	114128190
LOC114128301	uncharacterized LOC114128301	662	961	747.33	922	186.33	101	73.67	130.65	85.95	133.8	23.68	13.59	10.18	116.8	15.8167	0.12596	-2.98896	6.88e-19	1.21e-16	yes	down	XP_027848585.1(uncharacterized protein LOC114128301 [Aphis gossypii])	0	0	0	0	0	0	0	0	114128301
LOC114128307	uncharacterized LOC114128307	3876	71	67	89	29	39	42	1.48	1.2	2.03	0.57	0.81	0.89	1.57	0.756667	0.436047	-1.19744	0.000221879	0.00403144	yes	down	XP_027848589.1(uncharacterized protein LOC114128307 [Aphis gossypii])	0	K20674	MODSP	map04624(Toll and Imd signaling pathway)	COG5640(O:Posttranslational modification, protein turnover, chaperones)	COG5640(protease)	PF00089.27(Trypsin:Trypsin); PF00057.19(Ldl_recept_a:Low-density lipoprotein receptor domain class A)	sp|P28175|CFC_TACTR(Clotting factor C OS=Tachypleus tridentatus OX=6853 PE=1 SV=1)	114128307
LOC114128868	pathogenesis-related protein 5-like	1203	3	2	2	18	15	28	0.16	0.1	0.12	0.93	0.82	1.57	0.126667	1.10667	7.83089	2.96918	0.00024255	0.00435869	yes	up	XP_027849270.1(LOW QUALITY PROTEIN: pathogenesis-related protein 5-like [Aphis gossypii])	0	0	0	0	ENOG4111KEV(S:Function unknown); ENOG4111GDH(S:Function unknown)	ENOG4111KEV(thaumatin-like protein); ENOG4111GDH(thaumatin-like protein)	PF00314.18(Thaumatin:Thaumatin family)	sp|P28493|PR5_ARATH(Pathogenesis-related protein 5 OS=Arabidopsis thaliana OX=3702 GN=At1g75040 PE=1 SV=1)	114128868
LOC114129240	protein yellow-like, transcript variant X1	3045	62	58	50	113	174	95	1.56	1.36	1.52	2.47	3.81	2.41	1.48	2.89667	2.0417	1.02977	0.00145512	0.0190662	yes	up	XP_027849701.1(protein yellow-like [Aphis gossypii])	0	0	0	0	ENOG410XT7N(S:Function unknown)	ENOG410XT7N(Major royal jelly protein)	PF03022.17(MRJP:Major royal jelly protein)	sp|P09957|YELL_DROME(Protein yellow OS=Drosophila melanogaster OX=7227 GN=y PE=2 SV=1)	114129240
LOC114125285	uncharacterized LOC114125285, transcript variant X2	1039	67.82	99.06	46.97	4	1	1	4.72	5.99	3.55	0.27	0.07	0.07	4.75333	0.136667	0.0259323	-5.26911	2.27e-13	2.21e-11	yes	down	XP_027849966.1(LOW QUALITY PROTEIN: lachesin-like [Aphis gossypii])	0	0	0	0	ENOG4110N31(S:Function unknown)	ENOG4110N31(IGc2)	0	sp|Q26474|LACH_SCHAM(Lachesin OS=Schistocerca americana OX=7009 GN=LAC PE=1 SV=1)	114125285
LOC114129495	endochitinase A-like	2656	41408	49997	43426	17956	19550	20352	875.61	930.17	1005.65	358.38	412.29	439.46	937.143	403.377	0.39053	-1.35649	7.68e-49	8.8e-46	yes	down	XP_027850048.1(endochitinase A-like [Aphis gossypii])	0	0	0	0	0	0	0	0	114129495
LOC114129664	trypsin-1-like	1503	1538.55	948.28	1687.91	992.17	539.38	555.46	62.01	35.06	76.34	46.8	26.37	24.69	57.8033	32.62	0.453359	-1.14127	0.000454931	0.00724414	yes	down	XP_027850262.1(trypsin-1-like [Aphis gossypii])	GO:0004252(molecular_function:serine-type endopeptidase activity)	0	0	0	COG5640(O:Posttranslational modification, protein turnover, chaperones)	COG5640(protease)	PF00089.27(Trypsin:Trypsin); PF13365.7(Trypsin_2:Trypsin-like peptidase domain)	sp|P03952|KLKB1_HUMAN(Plasma kallikrein OS=Homo sapiens OX=9606 GN=KLKB1 PE=1 SV=1)	114129664
LOC114129740	hemoglobinase-like	1841	2065	2025	2129	4852	5817	4910	66.68	57.31	75.1	147.74	187.2	161.84	66.3633	165.593	2.26924	1.18221	1.71e-15	2.05e-13	yes	up	XP_027850361.1(hemoglobinase-like [Aphis gossypii])	GO:0006624(biological_process:vacuolar protein processing); GO:0051603(biological_process:proteolysis involved in cellular protein catabolic process); GO:0008233(molecular_function:peptidase activity); GO:0004197(molecular_function:cysteine-type endopeptidase activity); GO:0005773(cellular_component:vacuole)	K01369	LGMN	map04612(Antigen processing and presentation); map04142(Lysosome)	COG5206(S:Function unknown)	COG5206(Tight junction associated protein 1 (Peripheral))	PF01650.19(Peptidase_C13:Peptidase C13 family)	sp|P09841|HGLB_SCHMA(Hemoglobinase OS=Schistosoma mansoni OX=6183 PE=1 SV=3)	114129740
LOC114130202	uncharacterized LOC114130202, transcript variant X2	1914	703	628	706	393	429	219	19.29	15.67	21.64	10.7	12.43	6.58	18.8667	9.90333	0.466502	-1.10004	6.84e-05	0.00148295	yes	down	XP_027850922.1(uncharacterized protein LOC114130202 isoform X2 [Aphis gossypii])	GO:0042302(molecular_function:structural constituent of cuticle)	0	0	0	ENOG4111IH8(S:Function unknown)	ENOG4111IH8(Insect cuticle protein)	PF00379.24(Chitin_bind_4:Insect cuticle protein)	0	114130202
LOC114130315	uncharacterized LOC114130315	598	14.53	5.35	21.69	77.88	124.16	29.76	2.39	0.74	3.79	11.95	20.19	4.98	2.30667	12.3733	4.96767	2.31257	0.00025605	0.00455134	yes	up	XP_027851062.1(uncharacterized protein LOC114130315 [Aphis gossypii])	GO:0016021(cellular_component:integral component of membrane)	0	0	0	0	0	0	0	114130315
LOC114130465	uncharacterized protein DDB_G0283357-like	4955	270	482	458	161	157	144	3.13	5	5.81	1.79	1.78	1.73	4.64667	1.76667	0.351947	-1.50657	7.32e-11	5.31e-09	yes	down	XP_027851246.1(LOW QUALITY PROTEIN: uncharacterized protein DDB_G0283357-like [Aphis gossypii])	0	0	0	0	0	0	0	0	114130465
LOC114130931	cuticle protein 7-like	577	0	0	0	21.43	24.51	36.56	0	0	0	3.53	4.28	6.56	0	4.79	135.266	7.07966	8.23e-08	3.67e-06	yes	up	KAE9541033.1(hypothetical protein AGLY_004278 [Aphis glycines])	GO:0042302(molecular_function:structural constituent of cuticle)	0	0	0	ENOG410YXZN(S:Function unknown); ENOG410YXTN(S:Function unknown)	ENOG410YXZN(Cuticular protein); ENOG410YXTN(Cuticular protein)	PF00379.24(Chitin_bind_4:Insect cuticle protein)	sp|P11733|CU07_LOCMI(Cuticle protein 7 OS=Locusta migratoria OX=7004 PE=1 SV=2)	114130931
LOC114131003	transcriptional regulatory protein AlgP-like	823	2	3	3	96	128	71	0.19	0.24	0.31	16.18	23	14.5	0.246667	17.8933	33.8087	5.07932	7.71e-16	9.61e-14	yes	up	XP_027851922.1(uncharacterized protein LOC114131003 [Aphis gossypii])	0	0	0	0	0	0	0	0	114131003
LOC114131326	uncharacterized LOC114131326	1105	91	95	77	232	245	129	4.99	4.27	4.57	11.21	12.08	7.19	4.61	10.16	2.11688	1.08194	0.000540574	0.00833929	yes	up	XP_027852320.1(uncharacterized protein LOC114131326 [Aphis gossypii])	0	0	0	0	0	0	0	0	114131326
LOC114131370	uncharacterized LOC114131370	1011	245	266	290	91	185	80	17.08	16.04	21.9	5.96	12.82	5.68	18.34	8.15333	0.403777	-1.30837	3.98e-05	0.000933724	yes	down	XP_027852365.1(uncharacterized protein LOC114131370 [Aphis gossypii])	0	0	0	0	0	0	0	0	114131370
LOC114128244	uncharacterized LOC114128244	1054	4	9	3	24	23	33	0.26	0.51	0.21	1.48	1.5	2.21	0.326667	1.73	4.59311	2.19947	0.000495452	0.00776006	yes	up	KAE9523061.1(hypothetical protein AGLY_016543 [Aphis glycines])	0	0	0	0	ENOG41117KI(S:Function unknown)	ENOG41117KI(-)	0	0	114128244

## Sheet: DEGs with transmembrane domains
gene_name	description	length	MA_1_count	MA_2_count	MA_3_count	CU_1_count	CU_2_count	CU_3_count	MA_1_tpm	MA_2_tpm	MA_3_tpm	CU_1_tpm	CU_2_tpm	CU_3_tpm	MA_tpm	CU_tpm	fc	log2fc	pvalue	padjust	significant	regulate	nr	go	KO_id	KO_name	paths	cog	cog_description	pfam	swissprot	entrez
LOC114125044	uncharacterized LOC114125044, transcript variant X1	601	208	236	268	657	777	460	33.9	32.25	46.35	99.84	125.12	76.16	37.5	100.373	2.43404	1.28335	1.51e-07	6.32e-06	yes	up	AGE97636.1(odorant binding protein 6 [Aphis gossypii])	GO:0005549(molecular_function:odorant binding)	0	0	0	ENOG410ZH43(S:Function unknown); ENOG41118W2(S:Function unknown)	ENOG410ZH43(Odorant-binding protein); ENOG41118W2(odorant-binding protein 58c)	PF01395.23(PBP_GOBP:PBP/GOBP family)	0	114125044
ATP6	ATP synthase F0 subunit 6	654	790	682	909	486	517	217	109.79	80.1	134.76	63.11	71.11	30.66	108.217	54.96	0.468616	-1.09352	0.000730082	0.0107866	yes	down	YP_009048916.1(ATP synthase F0 subunit 6 [Aphis gossypii])	GO:0045263(cellular_component:proton-transporting ATP synthase complex, coupling factor F(o)); GO:0005743(cellular_component:mitochondrial inner membrane); GO:0016021(cellular_component:integral component of membrane); GO:0015986(biological_process:ATP synthesis coupled proton transport); GO:0015078(molecular_function:hydrogen ion transmembrane transporter activity)	K02126	ATPeF0A, MTATP6, ATP6	map05012(Parkinson disease); map00190(Oxidative phosphorylation); map05010(Alzheimer disease); map05016(Huntington disease); map04714(Thermogenesis)	COG0356(C:Energy production and conversion)	COG0356(it plays a direct role in the translocation of protons across the membrane (By similarity))	0	sp|Q9B6H6|ATP6_RHOPD(ATP synthase subunit a OS=Rhopalosiphum padi OX=40932 GN=MT-ATP6 PE=3 SV=1)	19909103
ND5	NADH dehydrogenase subunit 5	1671	412	238	461	208	162	61	14.5	7.12	16.81	6.57	5.61	2.21	12.81	4.79667	0.353815	-1.49893	0.000512077	0.00796603	yes	down	YP_009048919.1(NADH dehydrogenase subunit 5 [Aphis gossypii])	GO:0008137(molecular_function:NADH dehydrogenase (ubiquinone) activity); GO:0016021(cellular_component:integral component of membrane); GO:0070469(cellular_component:respiratory chain); GO:0042773(biological_process:ATP synthesis coupled electron transport); GO:0005743(cellular_component:mitochondrial inner membrane)	K03883	ND5	map04723(Retrograde endocannabinoid signaling); map05012(Parkinson disease); map05010(Alzheimer disease); map05016(Huntington disease); map04714(Thermogenesis); map00190(Oxidative phosphorylation)	COG1009(C:Energy production and conversion)	COG1009(subunit l)	0	sp|Q36428|NU5M_LOCMI(NADH-ubiquinone oxidoreductase chain 5 OS=Locusta migratoria OX=7004 GN=ND5 PE=3 SV=1)	19909106
LOC114126233	uncharacterized LOC114126233	360	0	8.12	0	34.47	34.62	51.86	0	3.89	0	19.78	21.1	33.1	1.29667	24.66	14.2866	3.83659	6.01e-06	0.000180036	yes	up	XP_022164833.1(translocon-associated protein subunit gamma [Myzus persicae])	GO:0016021(cellular_component:integral component of membrane); GO:0006614(biological_process:SRP-dependent cotranslational protein targeting to membrane); GO:0005783(cellular_component:endoplasmic reticulum)	K13251	SSR3	map04141(Protein processing in endoplasmic reticulum)	ENOG410XR1X(U:Intracellular trafficking, secretion, and vesicular transport)	ENOG410XR1X(signal sequence receptor, gamma (translocon-associated protein gamma))	0	sp|Q9UNL2|SSRG_HUMAN(Translocon-associated protein subunit gamma OS=Homo sapiens OX=9606 GN=SSR3 PE=1 SV=1)	114126233
LOC114123364	uncharacterized LOC114123364	867	165	150	243	100	120	79	14.4	11.26	22.88	8.19	10.4	7.02	16.18	8.53667	0.485497	-1.04247	0.0005047	0.00787264	yes	down	XP_026812042.1(uncharacterized protein LOC113553094 [Rhopalosiphum maidis])	0	0	0	0	0	0	0	0	114123364
LOC114131958	glucose dehydrogenase [FAD, quinone]-like, transcript variant X2	2581	607	520	417	1203	1737	1389	13.5	10.19	10.16	25.35	38.67	31.67	11.2833	31.8967	2.52613	1.33693	2.52e-10	1.73e-08	yes	up	XP_027853117.1(glucose dehydrogenase [FAD, quinone]-like [Aphis gossypii])	GO:0016021(cellular_component:integral component of membrane); GO:0050660(molecular_function:flavin adenine dinucleotide binding); GO:0016614(molecular_function:oxidoreductase activity, acting on CH-OH group of donors)	0	0	0	COG2303(E:Amino acid transport and metabolism)	COG2303(oxidoreductase)	PF00732.20(GMC_oxred_N:GMC oxidoreductase); PF05199.14(GMC_oxred_C:GMC oxidoreductase); PF00890.25(FAD_binding_2:FAD binding domain); PF01266.25(DAO:FAD dependent oxidoreductase)	sp|P18173|DHGL_DROME(Glucose dehydrogenase [FAD, quinone] OS=Drosophila melanogaster OX=7227 GN=Gld PE=3 SV=3)	114131958
LOC114131989	glucose dehydrogenase [FAD, quinone]-like	1846	524.08	469.89	482.02	304.58	128.61	212.65	16.87	13.26	16.95	9.24	4.13	6.99	15.6933	6.78667	0.400568	-1.31988	1.67e-05	0.000435977	yes	down	XP_027853157.1(glucose dehydrogenase [FAD, quinone]-like [Aphis gossypii])	GO:0050660(molecular_function:flavin adenine dinucleotide binding); GO:0016614(molecular_function:oxidoreductase activity, acting on CH-OH group of donors)	0	0	0	COG2303(E:Amino acid transport and metabolism)	COG2303(oxidoreductase)	PF00732.20(GMC_oxred_N:GMC oxidoreductase); PF05199.14(GMC_oxred_C:GMC oxidoreductase)	sp|P18173|DHGL_DROME(Glucose dehydrogenase [FAD, quinone] OS=Drosophila melanogaster OX=7227 GN=Gld PE=3 SV=3)	114131989
LOC114132365	glucose dehydrogenase [FAD, quinone]-like	1282	247.09	201.69	261.02	0	0	0	12.5	8.88	14.36	0	0	0	11.9133	0	0.000699914	-10.4805	4.06e-18	6.21e-16	yes	down	XP_027853618.1(LOW QUALITY PROTEIN: glucose dehydrogenase [FAD, quinone]-like [Aphis gossypii])	0	0	0	0	COG2303(E:Amino acid transport and metabolism)	COG2303(oxidoreductase)	PF00732.20(GMC_oxred_N:GMC oxidoreductase); PF13450.7(NAD_binding_8:NAD(P)-binding Rossmann-like domain); PF05834.13(Lycopene_cycl:Lycopene cyclase protein); PF07992.15(Pyr_redox_2:Pyridine nucleotide-disulphide oxidoreductase); PF01266.25(DAO:FAD dependent oxidoreductase)	sp|P18173|DHGL_DROME(Glucose dehydrogenase [FAD, quinone] OS=Drosophila melanogaster OX=7227 GN=Gld PE=3 SV=3)	114132365
LOC114132505	arylsulfatase B-like	1855	438	592	559	312	260	207	14.02	16.61	19.54	9.42	8.29	6.76	16.7233	8.15667	0.451985	-1.14565	2.33e-07	9.34e-06	yes	down	XP_027853781.1(arylsulfatase B-like [Aphis gossypii])	GO:0016021(cellular_component:integral component of membrane); GO:0008484(molecular_function:sulfuric ester hydrolase activity)	0	0	0	COG3119(P:Inorganic ion transport and metabolism)	COG3119(Sulfatase)	PF00884.24(Sulfatase:Sulfatase); PF01663.23(Phosphodiest:Type I phosphodiesterase / nucleotide pyrophosphatase)	sp|P50430|ARSB_RAT(Arylsulfatase B OS=Rattus norvegicus OX=10116 GN=Arsb PE=2 SV=2)	114132505
LOC114132909	glucose dehydrogenase [FAD, quinone]-like	2189	43	32	51	17	5	7	1.13	0.74	1.47	0.42	0.13	0.19	1.11333	0.246667	0.210171	-2.25037	8.63e-05	0.00179237	yes	down	XP_027854320.1(glucose dehydrogenase [FAD, quinone]-like [Aphis gossypii])	GO:0050660(molecular_function:flavin adenine dinucleotide binding); GO:0016614(molecular_function:oxidoreductase activity, acting on CH-OH group of donors)	0	0	0	COG2303(K:Transcription)	COG2303(asunder, spermatogenesis regulator homolog (Drosphila))	PF00732.20(GMC_oxred_N:GMC oxidoreductase); PF05199.14(GMC_oxred_C:GMC oxidoreductase)	sp|P18173|DHGL_DROME(Glucose dehydrogenase [FAD, quinone] OS=Drosophila melanogaster OX=7227 GN=Gld PE=3 SV=3)	114132909
LOC114119701	uncharacterized LOC114119701, transcript variant X1	2083	145	260	113	579	401	333	4.12	6.42	3.45	15.39	11.4	9.61	4.66333	12.1333	2.38075	1.25142	9.27e-05	0.00191507	yes	up	XP_027837176.1(uncharacterized protein LOC114119701 isoform X1 [Aphis gossypii])	GO:0016021(cellular_component:integral component of membrane)	0	0	0	ENOG410YMHR(T:Signal transduction mechanisms); ENOG410ZKXE(S:Function unknown)	ENOG410YMHR(Cyclin-Dependent Kinase); ENOG410ZKXE(Nucleoside H+ symporter)	PF12832.8(MFS_1_like:MFS_1 like family); PF07690.17(MFS_1:Major Facilitator Superfamily); PF01306.20(LacY_symp:LacY proton/sugar symporter)	sp|Q8CBH5|MFSD6_MOUSE(Major facilitator superfamily domain-containing protein 6 OS=Mus musculus OX=10090 GN=Mfsd6 PE=1 SV=1)	114119701
LOC114121380	UDP-glucuronosyltransferase-like	1824	402	477	374	200	206	279	13.13	13.65	13.34	6.16	6.7	9.3	13.3733	7.38667	0.495735	-1.01236	9.93e-09	5.22e-07	yes	down	XP_027839491.1(UDP-glucuronosyltransferase-like [Aphis gossypii])	GO:0015020(molecular_function:glucuronosyltransferase activity); GO:0016021(cellular_component:integral component of membrane)	K00699	UGT	map05204(Chemical carcinogenesis); map00983(Drug metabolism - other enzymes); map00982(Drug metabolism - cytochrome P450); map00980(Metabolism of xenobiotics by cytochrome P450); map00040(Pentose and glucuronate interconversions); map00860(Porphyrin and chlorophyll metabolism); map00053(Ascorbate and aldarate metabolism); map00830(Retinol metabolism); map00140(Steroid hormone biosynthesis)	COG1819(S:Function unknown)	COG1819(Transferase)	PF00201.19(UDPGT:UDP-glucoronosyl and UDP-glucosyl transferase); PF04101.17(Glyco_tran_28_C:Glycosyltransferase family 28 C-terminal domain)	sp|Q9Y4X1|UD2A1_HUMAN(UDP-glucuronosyltransferase 2A1 OS=Homo sapiens OX=9606 GN=UGT2A1 PE=1 SV=2)	114121380
LOC114122698	ribonucleoside-diphosphate reductase subunit M2-like, transcript variant X1	1607	87.42	139.14	189.36	1175.79	1270.57	1229.82	3.2	4.6	7.86	39.75	45.25	45.01	5.22	43.3367	8.09207	3.01651	9.38e-37	4.89e-34	yes	up	XP_027841242.1(ribonucleoside-diphosphate reductase subunit M2-like isoform X1 [Aphis gossypii])	GO:0009263(biological_process:deoxyribonucleotide biosynthetic process); GO:0016021(cellular_component:integral component of membrane); GO:0016491(molecular_function:oxidoreductase activity)	K10808	RRM2	map00240(Pyrimidine metabolism); map00480(Glutathione metabolism); map00983(Drug metabolism - other enzymes); map00230(Purine metabolism); map04115(p53 signaling pathway)	COG0208(F:Nucleotide transport and metabolism)	COG0208(Provides the precursors necessary for DNA synthesis. Catalyzes the biosynthesis of deoxyribonucleotides from the corresponding ribonucleotides (By similarity))	PF00268.22(Ribonuc_red_sm:Ribonucleotide reductase, small chain)	sp|P48592|RIR2_DROME(Ribonucleoside-diphosphate reductase subunit M2 OS=Drosophila melanogaster OX=7227 GN=RnrS PE=1 SV=2)	114122698
LOC114126801	cadherin-89D-like	4864	711.78	741.69	900.57	559	316.71	312.4	7.58	6.82	10.18	5.41	3.37	3.25	8.19333	4.01	0.46414	-1.10737	6.98e-05	0.00151029	yes	down	XP_027846623.1(cadherin-89D-like [Aphis gossypii])	GO:0016021(cellular_component:integral component of membrane); GO:0007156(biological_process:homophilic cell adhesion via plasma membrane adhesion molecules); GO:0005509(molecular_function:calcium ion binding); GO:0005886(cellular_component:plasma membrane)	0	0	0	ENOG410XQHI(U:Intracellular trafficking, secretion, and vesicular transport)	ENOG410XQHI(Cadherins are calcium dependent cell adhesion proteins (By similarity))	PF00028.18(Cadherin:Cadherin domain); PF08758.12(Cadherin_pro:Cadherin prodomain like)	sp|Q9VEU1|CAD89_DROME(Cadherin-89D OS=Drosophila melanogaster OX=7227 GN=Cad89D PE=2 SV=3)	114126801
LOC114126811	cadherin-89D-like	900	20.22	35.31	60.43	0	7.29	3.6	1.67	2.51	5.38	0	0.6	0.3	3.18667	0.3	0.086049	-3.5387	3.95e-06	0.000123926	yes	down	XP_027846635.1(cadherin-89D-like [Aphis gossypii])	GO:0016021(cellular_component:integral component of membrane); GO:0007156(biological_process:homophilic cell adhesion via plasma membrane adhesion molecules); GO:0005509(molecular_function:calcium ion binding); GO:0005886(cellular_component:plasma membrane)	0	0	0	ENOG410XQHI(S:Function unknown)	ENOG410XQHI(Collagen triple helix repeat (20 copies))	PF00028.18(Cadherin:Cadherin domain)	sp|Q9VEU1|CAD89_DROME(Cadherin-89D OS=Drosophila melanogaster OX=7227 GN=Cad89D PE=2 SV=3)	114126811
LOC114131928	uncharacterized LOC114131928	3298	63	77	68	24	21	21	2.36	3.55	2.34	0.87	0.89	0.73	2.75	0.83	0.289739	-1.78717	1.45e-07	6.13e-06	yes	down	XP_027853072.1(uncharacterized protein LOC114131928 [Aphis gossypii])	GO:0004222(molecular_function:metalloendopeptidase activity); GO:0004601(molecular_function:peroxidase activity); GO:0020037(molecular_function:heme binding); GO:0006979(biological_process:response to oxidative stress)	0	0	0	ENOG410XS6N(S:Function unknown); ENOG410XPKZ(S:Function unknown)	ENOG410XS6N(Reprolysin (M12B) family zinc metalloprotease); ENOG410XPKZ(Reprolysin (M12B) family zinc metalloprotease)	PF01421.20(Reprolysin:Reprolysin (M12B) family zinc metalloprotease); PF13574.7(Reprolysin_2:Metallo-peptidase family M12B Reprolysin-like); PF13582.7(Reprolysin_3:Metallo-peptidase family M12B Reprolysin-like); PF13688.7(Reprolysin_5:Metallo-peptidase family M12); PF13583.7(Reprolysin_4:Metallo-peptidase family M12B Reprolysin-like)	sp|Q19204|ADT2_CAEEL(A disintegrin and metalloproteinase with thrombospondin motifs adt-2 OS=Caenorhabditis elegans OX=6239 GN=adt-2 PE=1 SV=5)	114131928
LOC114132038	tachykinin-like peptides receptor 99D	820	15.61	2.82	2.71	35.24	84.89	37.69	1.48	0.23	0.28	3.14	8.01	3.65	0.663333	4.93333	6.29056	2.65319	0.000174019	0.00329774	yes	up	XP_027853207.1(tachykinin-like peptides receptor 99D, partial [Aphis gossypii])	GO:0004983(molecular_function:neuropeptide Y receptor activity); GO:0016021(cellular_component:integral component of membrane)	K14071	LKR	0	ENOG410XSC5(K:Transcription)	ENOG410XSC5(Neurogenic differentiation factor)	PF00001.22(7tm_1:7 transmembrane receptor (rhodopsin family)); PF10320.10(7TM_GPCR_Srsx:Serpentine type 7TM GPCR chemoreceptor Srsx)	sp|P30975|TLR2_DROME(Tachykinin-like peptides receptor 99D OS=Drosophila melanogaster OX=7227 GN=TkR99D PE=2 SV=2)	114132038
LOC114132059	uncharacterized LOC114132059	738	2376.33	2569.33	1559.67	5230	4850	6688.33	268.81	248.28	189.45	553.27	543.13	768.13	235.513	621.51	2.33748	1.22495	1.26e-09	7.63e-08	yes	up	XP_027853238.1(uncharacterized protein LOC114132059 [Aphis gossypii])	0	0	0	0	0	0	0	0	114132059
LOC114132540	neprilysin-2	3121	8140	7591	9196	4949	3739	3143	143.81	118.13	178.06	82.55	65.89	56.71	146.667	68.3833	0.433836	-1.20478	1.08e-07	4.74e-06	yes	down	XP_027853825.1(neprilysin-2 [Aphis gossypii])	GO:0016021(cellular_component:integral component of membrane); GO:0004222(molecular_function:metalloendopeptidase activity)	K08635	MMEL1, NEP	0	COG3590(O:Posttranslational modification, protein turnover, chaperones)	COG3590(endothelin-converting enzyme)	PF05649.14(Peptidase_M13_N:Peptidase family M13); PF01431.22(Peptidase_M13:Peptidase family M13)	sp|A0A0B4K692|NEP2_DROME(Neprilysin-2 OS=Drosophila melanogaster OX=7227 GN=Nep2 PE=1 SV=1)	114132540
LOC114132690	neuronal acetylcholine receptor subunit alpha-7-like	2210	259.29	424.33	366.47	123.33	103	188.66	21.05	29.58	29.52	6.97	6.26	11.07	26.7167	8.1	0.360573	-1.47163	3.54e-09	2e-07	yes	down	XP_027854024.1(LOW QUALITY PROTEIN: neuronal acetylcholine receptor subunit alpha-7-like [Aphis gossypii])	GO:0045211(cellular_component:postsynaptic membrane); GO:0004888(molecular_function:transmembrane signaling receptor activity); GO:0016021(cellular_component:integral component of membrane); GO:0022848(molecular_function:acetylcholine-gated cation channel activity)	K05312	CHRNN	0	ENOG410XQGR(S:Function unknown)	ENOG410XQGR(Sema domain, immunoglobulin domain (Ig), transmembrane domain (TM) and short cytoplasmic domain, (Semaphorin))	PF02931.24(Neur_chan_LBD:Neurotransmitter-gated ion-channel ligand binding domain); PF02932.17(Neur_chan_memb:Neurotransmitter-gated ion-channel transmembrane region)	sp|P22770|ACHA7_CHICK(Neuronal acetylcholine receptor subunit alpha-7 OS=Gallus gallus OX=9031 GN=CHRNA7 PE=1 SV=1)	114132690
LOC114132874	translocator protein	773	559	704	570	267	272	287	58.37	62.85	63.97	26.12	28.17	30.51	61.73	28.2667	0.411102	-1.28243	2.91e-19	5.39e-17	yes	down	XP_027854273.1(translocator protein [Aphis gossypii])	GO:0016021(cellular_component:integral component of membrane)	K05770	TSPO, BZRP	map05166(Human T-cell leukemia virus 1 infection); map04080(Neuroactive ligand-receptor interaction); map04979(Cholesterol metabolism); map04214(Apoptosis - fly)	COG3476(T:Signal transduction mechanisms)	COG3476(tspo and mbr like protein)	PF03073.16(TspO_MBR:TspO/MBR family)	sp|P30536|TSPO_HUMAN(Translocator protein OS=Homo sapiens OX=9606 GN=TSPO PE=1 SV=3)	114132874
LOC114132928	probable cytochrome P450 6a13, transcript variant X1	1954	6699	10734	5589	519	518	851	202.32	284.91	184.04	14.67	15.54	26.3	223.757	18.8367	0.0749468	-3.73799	3.46e-57	6.61e-54	yes	down	XP_027854335.1(probable cytochrome P450 6a13 isoform X1 [Aphis gossypii])	GO:0005506(molecular_function:iron ion binding); GO:0016705(molecular_function:oxidoreductase activity, acting on paired donors, with incorporation or reduction of molecular oxygen); GO:0004497(molecular_function:monooxygenase activity); GO:0020037(molecular_function:heme binding)	K14999	CYP6	0	COG2124(Q:Secondary metabolites biosynthesis, transport and catabolism)	COG2124(Cytochrome p450)	PF00067.23(p450:Cytochrome P450)	sp|Q9V4U9|C6A13_DROME(Probable cytochrome P450 6a13 OS=Drosophila melanogaster OX=7227 GN=Cyp6a13 PE=2 SV=1)	114132928
LOC114133071	uncharacterized LOC114133071	1034	0	0	0	20.44	9.72	40.68	0	0	0	1.3	0.65	2.8	0	1.58333	115.117	6.84696	1.21e-06	4.2e-05	yes	up	XP_027854495.1(uncharacterized protein LOC114133071 [Aphis gossypii])	GO:0016021(cellular_component:integral component of membrane)	0	0	0	0	0	0	0	114133071
LOC114118912	vesicle-associated membrane protein 2-like	1040	270	272	311	774	867	797	18.09	15.78	22.59	48.76	57.76	54.44	18.82	53.6533	2.59123	1.37364	4.2e-17	5.8e-15	yes	up	VVC29021.1(Synaptobrevin,Synaptobrevin/Vesicle-associated membrane protein [Cinara cedri])	GO:0016192(biological_process:vesicle-mediated transport); GO:0016021(cellular_component:integral component of membrane); GO:0006906(biological_process:vesicle fusion); GO:0019905(molecular_function:syntaxin binding); GO:0005886(cellular_component:plasma membrane); GO:0005484(molecular_function:SNAP receptor activity); GO:0031201(cellular_component:SNARE complex)	K13504	VAMP2	map04911(Insulin secretion); map04970(Salivary secretion); map04721(Synaptic vesicle cycle); map04130(SNARE interactions in vesicular transport); map04962(Vasopressin-regulated water reabsorption)	COG5143(J:Translation, ribosomal structure and biogenesis)	COG5143(sites to release the intron. The products are an intron and two tRNA half-molecules bearing 2',3' cyclic phosphate and 5'-OH termini. Recognizes a pseudosymmetric substrate in which 2 bulged loops of 3 bases are separated by a stem of 4 bp (By similarity))	PF00957.22(Synaptobrevin:Synaptobrevin)	sp|P35589|SYB_APLCA(Synaptobrevin OS=Aplysia californica OX=6500 PE=1 SV=1)	114118912
LOC114118975	pendrin-like, transcript variant X1	2254	4269.73	6906.1	3136.41	2742.73	1932.61	2860.24	101.08	145.87	81.53	61.7	45.21	69.54	109.493	58.8167	0.487169	-1.03751	3.74e-05	0.000883775	yes	down	XP_027836220.1(pendrin-like isoform X1 [Aphis gossypii])	0	K14453	K14453	0	COG0659(P:Inorganic ion transport and metabolism)	COG0659(sulfate transporter)	PF00916.21(Sulfate_transp:Sulfate permease family); PF01740.22(STAS:STAS domain)	sp|Q99NH7|S26A5_MOUSE(Prestin OS=Mus musculus OX=10090 GN=Slc26a5 PE=2 SV=3)	114118975
LOC114119133	A-kinase anchor protein 14-like	503	27	28	45	11997	798	9	6.44	5.47	11.21	2653.22	187.25	2.18	7.70667	947.55	123.729	6.95103	0.000164278	0.00313386	yes	up	KAF0771271.1(A-kinase anchor protein 14-like [Aphis craccivora])	0	0	0	0	0	0	0	0	114119133
LOC114119259	acetyl-coenzyme A transporter 1-like	725	83	86	153	33	44	62	7.3	7.66	14.85	3.08	4.77	6.46	9.93667	4.77	0.386262	-1.37235	0.000170482	0.00324142	yes	down	XP_027836567.1(acetyl-coenzyme A transporter 1-like [Aphis gossypii])	GO:0008521(molecular_function:acetyl-CoA transporter activity); GO:0016021(cellular_component:integral component of membrane)	K03372	ACATN, SLC33A1	map00604(Glycosphingolipid biosynthesis - ganglio series)	COG0477(G:Carbohydrate transport and metabolism)	COG0477(major facilitator Superfamily)	PF13000.8(Acatn:Acetyl-coenzyme A transporter 1)	sp|O00400|ACATN_HUMAN(Acetyl-coenzyme A transporter 1 OS=Homo sapiens OX=9606 GN=SLC33A1 PE=1 SV=1)	114119259
LOC114119261	acetyl-coenzyme A transporter 1-like	567	92	72	126	25	21	45	3.89	3.41	5.29	1.67	0.78	1.71	4.19667	1.38667	0.279438	-1.8394	3.11e-06	9.92e-05	yes	down	KAE9538662.1(hypothetical protein AGLY_005761 [Aphis glycines])	GO:0008521(molecular_function:acetyl-CoA transporter activity); GO:0016021(cellular_component:integral component of membrane)	K03372	ACATN, SLC33A1	map00604(Glycosphingolipid biosynthesis - ganglio series)	COG0477(G:Carbohydrate transport and metabolism)	COG0477(major facilitator Superfamily)	PF13000.8(Acatn:Acetyl-coenzyme A transporter 1)	sp|Q99J27|ACATN_MOUSE(Acetyl-coenzyme A transporter 1 OS=Mus musculus OX=10090 GN=Slc33a1 PE=1 SV=1)	114119261
LOC114119300	fatty acyl-CoA reductase wat-like	2029	5531	7105	8076	4537	4024	1989	159.24	179.5	254.2	123.21	115.49	58.46	197.647	99.0533	0.472023	-1.08307	0.000266791	0.00464858	yes	down	XP_027836609.1(fatty acyl-CoA reductase wat-like [Aphis gossypii])	GO:0102965(molecular_function:alcohol-forming fatty acyl-CoA reductase activity); GO:0016021(cellular_component:integral component of membrane); GO:0080019(molecular_function:fatty-acyl-CoA reductase (alcohol-forming) activity); GO:0006629(biological_process:lipid metabolic process)	K13356	FAR	map04146(Peroxisome); map04212(Longevity regulating pathway - worm)	ENOG410XS7R(S:Function unknown)	ENOG410XS7R(fatty-acyl-CoA reductase (alcohol-forming) activity)	PF07993.13(NAD_binding_4:Male sterility protein); PF03015.20(Sterile:Male sterility protein); PF02719.16(Polysacc_synt_2:Polysaccharide biosynthesis protein); PF01118.25(Semialdhyde_dh:Semialdehyde dehydrogenase, NAD binding domain)	sp|Q8MS59|WAT_DROME(Fatty acyl-CoA reductase wat OS=Drosophila melanogaster OX=7227 GN=wat PE=1 SV=1)	114119300
LOC114119539	delta-like protein 1	1260	689	635	662	439	308	325	35.64	28.6	37.25	21.38	15.86	17.15	33.83	18.13	0.491989	-1.0233	3.01e-06	9.65e-05	yes	down	KAF0773462.1(delta-like protein 1, partial [Aphis craccivora])	GO:0007154(biological_process:cell communication); GO:0016021(cellular_component:integral component of membrane); GO:0016020(cellular_component:membrane); GO:0005509(molecular_function:calcium ion binding)	0	0	0	ENOG410Y7WV(S:Function unknown)	ENOG410Y7WV(EGF-like domain)	PF07974.14(EGF_2:EGF-like domain); PF00008.28(EGF:EGF-like domain); PF01414.20(DSL:Delta serrate ligand); PF00053.25(Laminin_EGF:Laminin EGF domain)	sp|Q9JI71|DLL4_MOUSE(Delta-like protein 4 OS=Mus musculus OX=10090 GN=Dll4 PE=1 SV=2)	114119539
LOC114119609	cation-independent mannose-6-phosphate receptor	4311	53	47	41	94	81	140	0.66	0.52	0.56	1.1	1	1.78	0.58	1.29333	2.00897	1.00646	0.00141977	0.0187818	yes	up	XP_027837019.1(cation-independent mannose-6-phosphate receptor [Aphis gossypii])	GO:0005520(molecular_function:insulin-like growth factor binding); GO:0016021(cellular_component:integral component of membrane); GO:0038023(molecular_function:signaling receptor activity); GO:0007041(biological_process:lysosomal transport); GO:0005537(molecular_function:mannose binding)	K06564	IGF2R, CD222	map04144(Endocytosis); map04142(Lysosome)	ENOG410ZWHP(U:Intracellular trafficking, secretion, and vesicular transport)	ENOG410ZWHP(Insulin-like growth factor 2 receptor)	PF00878.19(CIMR:Cation-independent mannose-6-phosphate receptor repeat); PF13015.7(PRKCSH_1:Glucosidase II beta subunit-like protein)	sp|P08169|MPRI_BOVIN(Cation-independent mannose-6-phosphate receptor OS=Bos taurus OX=9913 GN=IGF2R PE=1 SV=2)	114119609
LOC114119773	phosphatidylinositol phosphatase PTPRQ, transcript variant X1	4507	22	17	23	53	50	111	0.3	0.2	0.34	0.66	0.68	1.54	0.28	0.96	3.06963	1.61806	0.000202578	0.00372802	yes	up	XP_027837262.1(phosphatidylinositol phosphatase PTPRQ [Aphis gossypii])	GO:0004725(molecular_function:protein tyrosine phosphatase activity); GO:0016021(cellular_component:integral component of membrane)	K01104	E3.1.3.48	0	COG5599(S:Function unknown)	COG5599(kelch-like)	PF00102.28(Y_phosphatase:Protein-tyrosine phosphatase); PF00041.22(fn3:Fibronectin type III domain); PF18861.2(PTP_tm:Transmembrane domain of protein tyrosine phosphatase, receptor type J); PF00782.21(DSPc:Dual specificity phosphatase, catalytic domain)	sp|Q9UMZ3|PTPRQ_HUMAN(Phosphatidylinositol phosphatase PTPRQ OS=Homo sapiens OX=9606 GN=PTPRQ PE=1 SV=2)	114119773
LOC114119959	beta-galactosidase-like	2323	537	621.76	547.11	322	304	186.54	12.58	12.78	14.42	7.06	7.1	4.46	13.26	6.20667	0.438657	-1.18883	1.19e-06	4.14e-05	yes	down	XP_027837509.1(beta-galactosidase-like [Aphis gossypii])	GO:0005975(biological_process:carbohydrate metabolic process); GO:0016021(cellular_component:integral component of membrane); GO:0004565(molecular_function:beta-galactosidase activity)	K12309	GLB1, ELNR1	map00600(Sphingolipid metabolism); map00604(Glycosphingolipid biosynthesis - ganglio series); map00052(Galactose metabolism); map00511(Other glycan degradation); map00531(Glycosaminoglycan degradation); map04142(Lysosome)	COG1874(G:Carbohydrate transport and metabolism)	COG1874(beta-galactosidase)	PF01301.20(Glyco_hydro_35:Glycosyl hydrolases family 35); PF02449.16(Glyco_hydro_42:Beta-galactosidase); PF13364.7(BetaGal_dom4_5:Beta-galactosidase jelly roll domain)	sp|O19015|BGAL_FELCA(Beta-galactosidase OS=Felis catus OX=9685 GN=GLB1 PE=2 SV=1)	114119959
LOC114120099	cytochrome c oxidase assembly protein COX20, mitochondrial	779	149	197	126	767	939	564	15.36	17.38	13.97	74.12	96.05	59.21	15.57	76.46	4.4299	2.14727	4.05e-18	6.21e-16	yes	up	XP_027837702.1(cytochrome c oxidase assembly protein COX20, mitochondrial [Aphis gossypii])	GO:0005743(cellular_component:mitochondrial inner membrane); GO:0033617(biological_process:mitochondrial respiratory chain complex IV assembly); GO:0016021(cellular_component:integral component of membrane)	K18184	COX20	map04714(Thermogenesis)	ENOG4111Y8F(S:Function unknown)	ENOG4111Y8F(COX20 Cox2 chaperone homolog (S. cerevisiae))	PF12597.9(DUF3767:Protein of unknown function (DUF3767))	sp|Q9D7J4|COX20_MOUSE(Cytochrome c oxidase assembly protein COX20, mitochondrial OS=Mus musculus OX=10090 GN=Cox20 PE=1 SV=1)	114120099
LOC114120425	carboxypeptidase B-like	1674	436	405	633	246	200	214	15.78	12.83	25.01	8.39	7.21	7.91	17.8733	7.83667	0.405812	-1.30112	1.22e-07	5.28e-06	yes	down	KAE9540859.1(hypothetical protein AGLY_004104 [Aphis glycines])	GO:0004181(molecular_function:metallocarboxypeptidase activity); GO:0008270(molecular_function:zinc ion binding)	0	0	0	COG2866(S:Function unknown)	COG2866(tetratricopeptide repeat domain 26)	PF00246.25(Peptidase_M14:Zinc carboxypeptidase); PF02244.17(Propep_M14:Carboxypeptidase activation peptide)	sp|P04069|CBPB_ASTAS(Carboxypeptidase B OS=Astacus astacus OX=6715 PE=1 SV=1)	114120425
LOC114120513	uncharacterized LOC114120513	808	11	8	5	0	0	0	1.07	0.67	0.52	0	0	0	0.753333	0	0.0206942	-5.59463	0.000415365	0.00668843	yes	down	XP_027838235.1(uncharacterized protein LOC114120513 [Aphis gossypii])	GO:0016021(cellular_component:integral component of membrane)	0	0	0	0	0	0	0	114120513
LOC114120680	uncharacterized LOC114120680	3620	331	410	382	143	157	178	6.18	7.6	7.76	2.32	2.71	3.02	7.18	2.68333	0.386818	-1.37027	9.49e-17	1.28e-14	yes	down	XP_027838462.1(uncharacterized protein LOC114120680 [Aphis gossypii])	GO:0016758(molecular_function:transferase activity, transferring hexosyl groups); GO:0015020(molecular_function:glucuronosyltransferase activity); GO:0016021(cellular_component:integral component of membrane)	K00699	UGT	map05204(Chemical carcinogenesis); map00983(Drug metabolism - other enzymes); map00982(Drug metabolism - cytochrome P450); map00980(Metabolism of xenobiotics by cytochrome P450); map00040(Pentose and glucuronate interconversions); map00860(Porphyrin and chlorophyll metabolism); map00053(Ascorbate and aldarate metabolism); map00830(Retinol metabolism); map00140(Steroid hormone biosynthesis)	COG1819(S:Function unknown)	COG1819(Transferase)	PF00201.19(UDPGT:UDP-glucoronosyl and UDP-glucosyl transferase); PF04101.17(Glyco_tran_28_C:Glycosyltransferase family 28 C-terminal domain); PF13439.7(Glyco_transf_4:Glycosyltransferase Family 4)	sp|P36511|UDB15_RAT(UDP-glucuronosyltransferase 2B15 OS=Rattus norvegicus OX=10116 GN=Ugt2b15 PE=1 SV=1)	114120680
LOC114120845	keratin-associated protein 6-2-like	592	2876	3524	3354	1192	1875	1106	471.2	486.12	585.1	183.06	303.4	185.41	514.14	223.957	0.390353	-1.35715	1.66e-10	1.16e-08	yes	down	XP_027838696.1(keratin-associated protein 6-2-like [Aphis gossypii])	0	0	0	0	0	0	0	0	114120845
LOC114121316	uncharacterized LOC114121316	437	97	91	96	53	51	45	29.65	23.47	31.65	14.43	15.34	14.78	28.2567	14.85	0.476348	-1.06991	0.000157038	0.00302087	yes	down	XP_027839384.1(uncharacterized protein LOC114121316 [Aphis gossypii])	0	0	0	0	0	0	0	0	114121316
LOC114121736	acyl-CoA Delta(11) desaturase-like	1286	370	644	475.87	232.98	218.72	145	21.29	30.01	27.15	12.64	10.97	8.76	26.15	10.79	0.372748	-1.42373	2.49e-08	1.24e-06	yes	down	XP_027839986.1(acyl-CoA Delta(11) desaturase-like [Aphis gossypii])	GO:0006633(biological_process:fatty acid biosynthetic process); GO:0016717(molecular_function:oxidoreductase activity, acting on paired donors, with oxidation of a pair of donors resulting in the reduction of molecular oxygen to two molecules of water); GO:0016021(cellular_component:integral component of membrane)	K00507	SCD, desC	map04152(AMPK signaling pathway); map01040(Biosynthesis of unsaturated fatty acids); map03320(PPAR signaling pathway); map04212(Longevity regulating pathway - worm)	COG1398(I:Lipid transport and metabolism)	COG1398(desaturase)	PF00487.25(FA_desaturase:Fatty acid desaturase)	sp|O44390|ACO11_TRINI(Acyl-CoA Delta(11) desaturase OS=Trichoplusia ni OX=7111 GN=D11DS PE=1 SV=2)	114121736
LOC114121740	tetraspanin-5-like	630	0	0	0.99	21.48	16.96	2.25	0	0	0.16	2.99	2.5	0.34	0.0533333	1.94333	34.8201	5.12185	0.00119173	0.0162851	yes	up	XP_027839989.1(tetraspanin-5-like [Aphis gossypii])	GO:0016021(cellular_component:integral component of membrane)	K17345	TSPAN5	0	ENOG4111IRY(S:Function unknown)	ENOG4111IRY(tetraspanin)	PF00335.21(Tetraspanin:Tetraspanin family)	0	114121740
LOC114121853	uncharacterized LOC114121853	1293	2080	1795	2306	1197	1153	726	103.61	77.89	125.07	56.24	57.08	43.72	102.19	52.3467	0.453487	-1.14087	4.5e-06	0.000138414	yes	down	XP_027840141.1(uncharacterized protein LOC114121853 [Aphis gossypii])	GO:0005549(molecular_function:odorant binding); GO:0016021(cellular_component:integral component of membrane)	0	0	0	ENOG410Z2AJ(S:Function unknown)	ENOG410Z2AJ(-)	PF01395.23(PBP_GOBP:PBP/GOBP family)	0	114121853
LOC114122010	vesicular glutamate transporter 2-like	1671	23.14	24.19	25.99	79.1	88.16	77.42	0.84	0.77	1.03	2.71	3.19	2.87	0.88	2.92333	3.03977	1.60396	1e-06	3.53e-05	yes	up	XP_027840352.1(vesicular glutamate transporter 2-like [Aphis gossypii])	GO:0016021(cellular_component:integral component of membrane)	K12302	SLC17A6_7_8	map04724(Glutamatergic synapse); map04723(Retrograde endocannabinoid signaling); map04721(Synaptic vesicle cycle); map05033(Nicotine addiction)	ENOG410ZVIF(G:Carbohydrate transport and metabolism); ENOG410XPWC(G:Carbohydrate transport and metabolism)	ENOG410ZVIF(Vesicular glutamate transporter); ENOG410XPWC(solute carrier family 17)	0	sp|Q9P2U8|VGLU2_HUMAN(Vesicular glutamate transporter 2 OS=Homo sapiens OX=9606 GN=SLC17A6 PE=2 SV=1)	114122010
[truncated: 101 more rows]

## Sheet: biotype-specific effectors (98)
gene	description	length	MA_1_count	MA_2_count	MA_3_count	CU_1_count	CU_2_count	CU_3_count	MA_1_tpm	MA_2_tpm	MA_3_tpm	CU_1_tpm	CU_2_tpm	CU_3_tpm	MA_tpm	CU_tpm	FC	Log2fc	p-value	p-adjust	Significant	Regulation	nr	go	KO_id	KO_name	paths	cog	cog_description	pfam	swissprot	entrez
[truncated: 98 more rows]
