# Supplementary material for: A Method for Identification of Biotype-Specific Salivary Effector Candidates of Aphid
Source: Insects. 2023 Sep 13;14(9):760. doi: 10.3390/insects14090760 (PMC10532216; doi:10.3390/insects14090760)
Supplement: Supplementary file 1 [file insects-14-00760-s001.zip › Table S4 Protein groups identified from aphid saliva by mass Spectrometry.xlsx]

## Sheet: proteinGroups
Protein IDs	Majority protein IDs	Fasta headers	Number of proteins	Peptides	Razor + unique peptides	Unique peptides	Peptides Hmian-1	Peptides Hmian-2	Peptides Hmian-3	Peptides CU-1	Peptides CU-2	Peptides CU-3	Peptides MA-1	Peptides MA-2	Peptides MA-3	Razor + unique peptides Hmian-1	Razor + unique peptides Hmian-2	Razor + unique peptides Hmian-3	Razor + unique peptides CU-1	Razor + unique peptides CU-2	Razor + unique peptides CU-3	Razor + unique peptides MA-1	Razor + unique peptides MA-2	Razor + unique peptides MA-3	Unique peptides Hmian-1	Unique peptides Hmian-2	Unique peptides Hmian-3	Unique peptides CU-1	Unique peptides CU-2	Unique peptides CU-3	Unique peptides MA-1	Unique peptides MA-2	Unique peptides MA-3	Sequence coverage [%]	Unique + razor sequence coverage [%]	Unique sequence coverage [%]	Mol. weight [kDa]	Sequence length	Sequence lengths	Q-value	Score	Sequence coverage Hmian-1 [%]	Sequence coverage Hmian-2 [%]	Sequence coverage Hmian-3 [%]	Sequence coverage CU-1 [%]	Sequence coverage CU-2 [%]	Sequence coverage CU-3 [%]	Sequence coverage MA-1 [%]	Sequence coverage MA-2 [%]
XP_027843668.1	XP_027843668.1	XP_027843668.1 uncharacterized protein LOC114124575 [Aphis gossypii]	1	30	30	30	20	18	19	21	21	21	24	24	25	20	18	19	21	21	21	24	24	25	20	18	19	21	21	21	24	24	25	52.5	52.5	52.5	134.46	1213	1213	0	323.31	32.6	24.1	31.5	27.4	28	28	43.9	44.4
XP_027854504.1	XP_027854504.1	XP_027854504.1 LOW QUALITY PROTEIN: uncharacterized protein LOC114133079 [Aphis gossypii]	1	49	49	49	37	36	34	42	43	44	27	28	26	37	36	34	42	43	44	27	28	26	37	36	34	42	43	44	27	28	26	54.8	54.8	54.8	127.55	1145	1145	0	323.31	41.3	39.6	39	48.2	51.2	46.6	31.2	31.5
XP_027842597.1	XP_027842597.1	XP_027842597.1 uncharacterized protein LOC114123730 [Aphis gossypii]	1	7	7	7	5	5	4	6	7	6	5	4	4	5	5	4	6	7	6	5	4	4	5	5	4	6	7	6	5	4	4	52.8	52.8	52.8	16.106	142	142	0	149.02	28.9	28.9	23.2	47.9	52.8	47.9	28.9	23.9
XP_027842596.1	XP_027842596.1	XP_027842596.1 uncharacterized protein LOC114123729 [Aphis gossypii]	1	7	7	7	2	3	2	6	6	7	2	3	2	2	3	2	6	6	7	2	3	2	2	3	2	6	6	7	2	3	2	60.9	60.9	60.9	17.781	156	156	0	176.45	17.3	23.1	17.3	60.9	57.1	60.9	17.3	42.3
XP_027850869.1	XP_027850869.1	XP_027850869.1 late cornified envelope-like proline-rich protein 1 [Aphis gossypii]	1	3	3	3	2	1	2	3	3	3	2	2	2	2	1	2	3	3	3	2	2	2	2	1	2	3	3	3	2	2	2	13.1	13.1	13.1	18.121	168	168	0	25.104	11.9	6.5	11.9	13.1	13.1	13.1	11.9	11.9
XP_027837970.1	XP_027837970.1	XP_027837970.1 LOW QUALITY PROTEIN: apolipophorins-like [Aphis gossypii]	1	93	93	93	40	38	36	82	75	74	31	34	34	40	38	36	82	75	74	31	34	34	40	38	36	82	75	74	31	34	34	42.5	42.5	42.5	314.58	2756	2756	0	323.31	20.2	20.4	18.5	39.5	37.6	36.8	16.7	18.3
XP_027853010.1	XP_027853010.1	XP_027853010.1 glucose dehydrogenase [FAD, quinone]-like [Aphis gossypii]	1	27	27	27	18	20	17	23	24	22	9	11	12	18	20	17	23	24	22	9	11	12	18	20	17	23	24	22	9	11	12	43.6	43.6	43.6	79.055	713	713	0	323.31	31.8	34.5	30	40.3	41.2	40.1	18.2	18.9
XP_027853848.1;XP_027852649.1;XP_027841315.1	XP_027853848.1;XP_027852649.1;XP_027841315.1	XP_027853848.1 actin-5C [Aphis gossypii];XP_027852649.1 actin-42A-like [Aphis gossypii];XP_027841315.1 actin, muscle [Aphis gossypii]	3	12	12	3	11	10	9	7	7	7	3	5	3	11	10	9	7	7	7	3	5	3	3	3	3	3	3	2	2	2	2	36.2	36.2	12.5	41.807	376	376;376;376	0	304.98	33.2	33.2	23.9	23.4	23.7	21.3	10.9	16
XP_027854023.1	XP_027854023.1	XP_027854023.1 putative uncharacterized protein DDB_G0267840 [Aphis gossypii]	1	10	10	10	3	5	5	8	9	8	4	5	5	3	5	5	8	9	8	4	5	5	3	5	5	8	9	8	4	5	5	44.9	44.9	44.9	36.115	325	325	0	323.31	14.8	18.8	22.8	30.5	40.6	40	19.1	19.4
XP_027853511.1	XP_027853511.1	XP_027853511.1 ATP synthase subunit beta, mitochondrial [Aphis gossypii]	1	5	5	5	4	5	4	1	0	0	4	4	4	4	5	4	1	0	0	4	4	4	4	5	4	1	0	0	4	4	4	12.9	12.9	12.9	55.81	521	521	0	169.21	10.2	12.9	10.7	2.7	0	0	10.7	10.7
XP_027843984.1;XP_027842129.1	XP_027843984.1;XP_027842129.1	XP_027843984.1 histone H4 [Aphis gossypii];XP_027842129.1 histone H4 [Aphis gossypii]	2	6	6	6	4	4	5	2	2	1	4	5	5	4	4	5	2	2	1	4	5	5	4	4	5	2	2	1	4	5	5	51.5	51.5	51.5	11.381	103	103;103	0	163.28	41.7	41.7	51.5	21.4	17.5	9.7	40.8	50.5
XP_027853250.1	XP_027853250.1	XP_027853250.1 peroxidase-like [Aphis gossypii]	1	17	17	17	5	5	6	16	15	14	5	5	4	5	5	6	16	15	14	5	5	4	5	5	6	16	15	14	5	5	4	34.5	34.5	34.5	70.585	623	623	0	323.01	11.4	11.4	15.1	33.2	33.1	31.1	11.4	11.4
XP_027842050.1	XP_027842050.1	XP_027842050.1 LOW QUALITY PROTEIN: probable cyclin-dependent serine/threonine-protein kinase DDB_G0292550 [Aphis gossypii]	1	22	22	22	6	6	6	18	18	18	1	1	0	6	6	6	18	18	18	1	1	0	6	6	6	18	18	18	1	1	0	30.9	30.9	30.9	102.92	941	941	0	323.31	9.5	10.5	9.6	26.6	26.6	25.4	1.6	1.6
XP_027839597.1;XP_027839590.1	XP_027839597.1;XP_027839590.1	XP_027839597.1 actin, muscle-like [Aphis gossypii];XP_027839590.1 actin, muscle-like [Aphis gossypii]	2	10	1	1	9	8	7	4	4	5	1	3	1	1	1	1	0	0	0	0	0	0	1	1	1	0	0	0	0	0	0	28.5	4.8	4.8	41.835	376	376;376	0	33.826	25.5	25.5	16.2	10.9	11.2	13.6	2.7	7.7
XP_027842130.1;XP_027850524.1;XP_027849246.1;XP_027849245.1;XP_027843987.1;XP_027839922.1	XP_027842130.1;XP_027850524.1;XP_027849246.1;XP_027849245.1;XP_027843987.1	XP_027842130.1 histone H3-like, partial [Aphis gossypii];XP_027850524.1 histone H3.3-like [Aphis gossypii];XP_027849246.1 histone H3.3 [Aphis gossypii];XP_027849245.1 histone H3.3 [Aphis gossypii];XP_027843987.1 histone H3 [Aphis gossypii]	6	3	3	3	2	1	2	0	0	0	1	1	1	2	1	2	0	0	0	1	1	1	2	1	2	0	0	0	1	1	1	17.4	17.4	17.4	13.004	115	115;136;136;136;136;136	0	20.695	17.4	9.6	17.4	0	0	0	7.8	7.8
XP_027837168.1	XP_027837168.1	XP_027837168.1 uncharacterized protein LOC114119699 [Aphis gossypii]	1	10	10	10	3	4	4	9	9	8	2	2	2	3	4	4	9	9	8	2	2	2	3	4	4	9	9	8	2	2	2	47.4	47.4	47.4	30.526	274	274	0	204	12.8	19.7	19.7	43.8	44.5	40.5	8	8
XP_027852804.1;XP_027846164.1;XP_027854514.1;XP_027854502.1;XP_027853233.1;XP_027843240.1;XP_027836957.1;XP_027840464.1	XP_027852804.1;XP_027846164.1;XP_027854514.1;XP_027854502.1;XP_027853233.1;XP_027843240.1;XP_027836957.1;XP_027840464.1	XP_027852804.1 heat shock protein 68-like [Aphis gossypii];XP_027846164.1 heat shock protein 70 B2-like [Aphis gossypii];XP_027854514.1 heat shock protein 70 A1-like [Aphis gossypii];XP_027854502.1 heat shock protein 70 A1-like [Aphis gossypii];XP_02785323	8	3	3	2	3	3	3	2	1	2	2	2	2	3	3	3	2	1	2	2	2	2	2	2	2	1	1	1	1	1	1	6.3	6.3	4.5	69.658	639	639;623;637;637;637;637;637;643	0	28.722	6.3	6.3	6.3	4.2	2.5	4.2	4.2	4.2
XP_027854022.1;XP_027854021.1;XP_027854020.1;XP_027854019.1;XP_027854017.1;XP_027854016.1;XP_027854015.1;XP_027854014.1;XP_027854013.1;XP_027854012.1;XP_027854018.1	XP_027854022.1;XP_027854021.1;XP_027854020.1;XP_027854019.1;XP_027854017.1;XP_027854016.1;XP_027854015.1;XP_027854014.1;XP_027854013.1;XP_027854012.1;XP_027854018.1	XP_027854022.1 protein starmaker-like isoform X11 [Aphis gossypii];XP_027854021.1 protein starmaker-like isoform X10 [Aphis gossypii];XP_027854020.1 dentin sialophosphoprotein-like isoform X9 [Aphis gossypii];XP_027854019.1 dentin sialophosphoprotein-like	11	9	9	9	4	4	4	8	7	8	3	2	2	4	4	4	8	7	8	3	2	2	4	4	4	8	7	8	3	2	2	14.5	14.5	14.5	58.557	510	510;510;527;529;572;572;572;589;589;591;548	0	211.66	9.2	9.4	9.4	11	11	14.5	9.4	5.3
XP_027844795.1	XP_027844795.1	XP_027844795.1 uncharacterized protein LOC114125378 [Aphis gossypii]	1	7	7	7	4	3	3	6	7	7	4	3	3	4	3	3	6	7	7	4	3	3	4	3	3	6	7	7	4	3	3	26.3	26.3	26.3	40.737	358	358	0	156.57	16.2	12.6	12.6	22.6	26.3	26.3	16.2	12.6
XP_027845346.1;XP_027838345.1	XP_027845346.1;XP_027838345.1	XP_027845346.1 ATP synthase subunit alpha, mitochondrial [Aphis gossypii];XP_027838345.1 ATP synthase subunit alpha, mitochondrial-like [Aphis gossypii]	2	2	2	2	2	1	1	0	0	0	1	1	1	2	1	1	0	0	0	1	1	1	2	1	1	0	0	0	1	1	1	3.6	3.6	3.6	59.795	551	551;232	0	15.105	3.6	2.4	2.4	0	0	0	2.4	2.4
XP_027848926.1	XP_027848926.1	XP_027848926.1 chitin synthase chs-2 [Aphis gossypii]	1	1	1	1	1	1	1	0	0	0	0	0	0	1	1	1	0	0	0	0	0	0	1	1	1	0	0	0	0	0	0	0.6	0.6	0.6	180	1567	1567	0	6.4747	0.6	0.6	0.6	0	0	0	0	0
XP_027839259.1	XP_027839259.1	XP_027839259.1 uncharacterized protein LOC114121223 [Aphis gossypii]	1	11	11	11	3	2	3	5	3	6	5	5	5	3	2	3	5	3	6	5	5	5	3	2	3	5	3	6	5	5	5	14.2	14.2	14.2	108.22	952	952	0	224.73	4.3	3.5	5.4	8.4	4.1	8.5	6.7	8.2
XP_027844801.1	XP_027844801.1	XP_027844801.1 uncharacterized protein LOC114125384 [Aphis gossypii]	1	8	8	8	1	1	3	6	5	5	3	3	3	1	1	3	6	5	5	3	3	3	1	1	3	6	5	5	3	3	3	27.2	27.2	27.2	41.038	353	353	0	68.973	7.6	7.6	12.7	22.7	19.3	19.3	16.4	17
XP_027849516.1;XP_027849510.1	XP_027849516.1;XP_027849510.1	XP_027849516.1 NAD-dependent protein deacetylase HST1-like [Aphis gossypii];XP_027849510.1 protein PFC0760c-like [Aphis gossypii]	2	11	11	11	1	2	3	8	10	11	0	0	1	1	2	3	8	10	11	0	0	1	1	2	3	8	10	11	0	0	1	31.2	31.2	31.2	56.455	506	506;327	0	237.69	2.8	5.5	8.3	26.5	29.6	31.2	0	0
XP_027842061.1	XP_027842061.1	XP_027842061.1 heat shock protein 60A [Aphis gossypii]	1	1	1	1	1	1	1	0	0	0	0	0	0	1	1	1	0	0	0	0	0	0	1	1	1	0	0	0	0	0	0	3	3	3	60.933	575	575	0	20.846	3	3	3	0	0	0	0	0
XP_027842099.1	XP_027842099.1	XP_027842099.1 uncharacterized protein LOC114123363 [Aphis gossypii]	1	3	3	3	1	1	1	2	2	2	0	1	1	1	1	1	2	2	2	0	1	1	1	1	1	2	2	2	0	1	1	18.9	18.9	18.9	15.189	127	127	0	40.788	12.6	12.6	5.5	13.4	13.4	13.4	0	12.6
XP_027851238.1	XP_027851238.1	XP_027851238.1 uncharacterized protein LOC114130459 [Aphis gossypii]	1	7	7	7	1	2	0	6	6	5	1	2	2	1	2	0	6	6	5	1	2	2	1	2	0	6	6	5	1	2	2	28	28	28	28.321	257	257	0	111.78	3.9	8.6	0	24.5	23.3	19.8	4.7	8.6
XP_027844510.1;XP_027844509.1;XP_027844508.1	XP_027844510.1;XP_027844509.1;XP_027844508.1	XP_027844510.1 carbonic anhydrase 2-like [Aphis gossypii];XP_027844509.1 carbonic anhydrase 2-like [Aphis gossypii];XP_027844508.1 carbonic anhydrase 2-like [Aphis gossypii]	3	6	6	6	1	2	1	4	5	5	2	2	2	1	2	1	4	5	5	2	2	2	1	2	1	4	5	5	2	2	2	28.3	28.3	28.3	32.14	276	276;276;276	0	72.353	4.7	10.5	4.7	20.7	24.6	24.6	10.5	9.4
XP_027849054.1;XP_027846951.1;XP_027846950.1;XP_027838512.1	XP_027849054.1;XP_027846951.1;XP_027846950.1;XP_027838512.1	XP_027849054.1 tubulin alpha-1C chain [Aphis gossypii];XP_027846951.1 tubulin alpha-1 chain-like isoform X2 [Aphis gossypii];XP_027846950.1 tubulin alpha-1 chain-like isoform X1 [Aphis gossypii];XP_027838512.1 tubulin alpha-1 chain [Aphis gossypii]	4	2	2	2	1	2	0	1	1	0	0	0	0	1	2	0	1	1	0	0	0	0	1	2	0	1	1	0	0	0	0	6.4	6.4	6.4	49.951	450	450;450;450;450	0	12.561	2	6.4	0	2	2	0	0	0
XP_027849533.1	XP_027849533.1	XP_027849533.1 LOW QUALITY PROTEIN: dynein heavy chain 7, axonemal-like [Aphis gossypii]	1	1	1	1	1	0	0	0	0	0	0	0	0	1	0	0	0	0	0	0	0	0	1	0	0	0	0	0	0	0	0	0.6	0.6	0.6	397.09	3466	3466	0	6.2087	0.6	0	0	0	0	0	0	0
XP_027836138.1	XP_027836138.1	XP_027836138.1 uncharacterized protein LOC114118907 [Aphis gossypii]	1	1	1	1	0	0	0	0	1	1	0	0	0	0	0	0	0	1	1	0	0	0	0	0	0	0	1	1	0	0	0	5.8	5.8	5.8	21.535	190	190	0	7.3024	0	0	0	0	5.8	5.8	0	0
XP_027836370.1	XP_027836370.1	XP_027836370.1 uncharacterized protein LOC114119100 [Aphis gossypii]	1	3	3	3	1	1	1	3	3	2	1	1	1	1	1	1	3	3	2	1	1	1	1	1	1	3	3	2	1	1	1	20.9	20.9	20.9	21.815	191	191	0	54.07	7.3	7.3	7.3	20.9	20.9	13.6	7.3	7.3
XP_027836422.1	XP_027836422.1	XP_027836422.1 uncharacterized protein LOC114119139 [Aphis gossypii]	1	3	3	3	0	0	0	3	3	2	0	0	0	0	0	0	3	3	2	0	0	0	0	0	0	3	3	2	0	0	0	8.3	8.3	8.3	41.988	363	363	0	17.662	0	0	0	8.3	8.3	5.2	0	0
XP_027836444.1;XP_027836443.1	XP_027836444.1;XP_027836443.1	XP_027836444.1 isocitrate dehydrogenase [NADP], mitochondrial-like isoform X2 [Aphis gossypii];XP_027836443.1 isocitrate dehydrogenase [NADP], mitochondrial-like isoform X1 [Aphis gossypii]	2	2	2	2	1	1	1	0	0	0	2	1	1	1	1	1	0	0	0	2	1	1	1	1	1	0	0	0	2	1	1	4.8	4.8	4.8	49.19	436	436;448	0	16.861	2.3	2.3	2.3	0	0	0	4.8	2.3
XP_027836601.1	XP_027836601.1	XP_027836601.1 heat shock protein 83 [Aphis gossypii]	1	1	1	1	0	0	0	0	0	0	0	1	1	0	0	0	0	0	0	0	1	1	0	0	0	0	0	0	0	1	1	1.9	1.9	1.9	83.284	727	727	0	7.727	0	0	0	0	0	0	0	1.9
XP_027837193.1	XP_027837193.1	XP_027837193.1 40S ribosomal protein S15 [Aphis gossypii]	1	1	1	1	0	0	0	0	0	0	1	1	1	0	0	0	0	0	0	1	1	1	0	0	0	0	0	0	1	1	1	6.7	6.7	6.7	17.156	150	150	0	6.4637	0	0	0	0	0	0	6.7	6.7
XP_027837275.1	XP_027837275.1	XP_027837275.1 carboxypeptidase D [Aphis gossypii]	1	1	1	1	1	1	1	0	0	0	0	1	0	1	1	1	0	0	0	0	1	0	1	1	1	0	0	0	0	1	0	1.1	1.1	1.1	154.95	1369	1369	0	6.1422	1.1	1.1	1.1	0	0	0	0	1.1
XP_027837426.1	XP_027837426.1	XP_027837426.1 uncharacterized protein LOC114119891 [Aphis gossypii]	1	8	8	8	1	1	0	0	0	0	6	6	5	1	1	0	0	0	0	6	6	5	1	1	0	0	0	0	6	6	5	29.1	29.1	29.1	43.052	378	378	0	72.688	4.2	4.2	0	0	0	0	23.3	21.4
XP_027837940.1	XP_027837940.1	XP_027837940.1 putative uncharacterized protein DDB_G0282133, partial [Aphis gossypii]	1	3	3	3	1	0	1	2	2	3	0	0	0	1	0	1	2	2	3	0	0	0	1	0	1	2	2	3	0	0	0	2.9	2.9	2.9	136.81	1203	1203	0	22.998	0.9	0	0.9	2	1.8	2.9	0	0
XP_027838033.1	XP_027838033.1	XP_027838033.1 uncharacterized protein LOC114120354 [Aphis gossypii]	1	3	3	3	0	0	1	1	1	2	2	2	1	0	0	1	1	1	2	2	2	1	0	0	1	1	1	2	2	2	1	16.5	16.5	16.5	27.532	242	242	0	81.983	0	0	7	4.1	5.4	12.4	9.5	9.5
XP_027838687.1	XP_027838687.1	XP_027838687.1 LOW QUALITY PROTEIN: uncharacterized protein LOC114120835 [Aphis gossypii]	1	5	5	5	0	0	0	2	5	4	0	0	0	0	0	0	2	5	4	0	0	0	0	0	0	2	5	4	0	0	0	14.5	14.5	14.5	38.451	332	332	0	38.024	0	0	0	6.3	14.5	11.7	0	0
XP_027849421.1;XP_027848900.1;XP_027844242.1;XP_027838730.1	XP_027849421.1;XP_027848900.1;XP_027844242.1;XP_027838730.1	XP_027849421.1 ubiquitin-60S ribosomal protein L40 [Aphis gossypii];XP_027848900.1 ubiquitin [Aphis gossypii];XP_027844242.1 polyubiquitin-I [Aphis gossypii];XP_027838730.1 polyubiquitin-G [Aphis gossypii]	4	1	1	1	1	0	0	1	1	0	1	1	1	1	0	0	1	1	0	1	1	1	1	0	0	1	1	0	1	1	1	7	7	7	14.719	128	128;150;306;381	0	8.5085	7	0	0	7	7	0	7	7
XP_027839062.1;XP_027839060.1	XP_027839062.1;XP_027839060.1	XP_027839062.1 eukaryotic peptide chain release factor GTP-binding subunit ERF3A-like [Aphis gossypii];XP_027839060.1 eukaryotic peptide chain release factor GTP-binding subunit ERF3A-like [Aphis gossypii]	2	2	2	2	0	0	0	0	0	1	1	0	1	0	0	0	0	0	1	1	0	1	0	0	0	0	0	1	1	0	1	3	3	3	61.849	563	563;572	0	10.452	0	0	0	0	0	1.8	1.2	0
XP_027839076.1;XP_027839075.1;XP_027839074.1;XP_027839073.1;XP_027849387.1	XP_027839076.1;XP_027839075.1;XP_027839074.1;XP_027839073.1;XP_027849387.1	XP_027839076.1 14-3-3 protein zeta isoform X2 [Aphis gossypii];XP_027839075.1 14-3-3 protein zeta isoform X1 [Aphis gossypii];XP_027839074.1 14-3-3 protein zeta isoform X1 [Aphis gossypii];XP_027839073.1 14-3-3 protein zeta isoform X1 [Aphis gossypii];XP_0	5	1	1	1	1	1	1	1	1	1	0	0	0	1	1	1	1	1	1	0	0	0	1	1	1	1	1	1	0	0	0	4	4	4	28.175	247	247;247;247;247;257	0	7.4686	4	4	4	4	4	4	0	0
XP_027840214.1	XP_027840214.1	XP_027840214.1 uncharacterized protein LOC114121906 [Aphis gossypii]	1	1	1	1	0	0	0	0	1	1	0	0	0	0	0	0	0	1	1	0	0	0	0	0	0	0	1	1	0	0	0	5.9	5.9	5.9	22.618	187	187	0	9.8104	0	0	0	0	5.9	5.9	0	0
XP_027840431.1	XP_027840431.1	XP_027840431.1 integrator complex subunit 3 homolog [Aphis gossypii]	1	2	2	2	0	0	0	1	1	1	1	2	2	0	0	0	1	1	1	1	2	2	0	0	0	1	1	1	1	2	2	5.5	5.5	5.5	58.203	527	527	0	57.851	0	0	0	2.7	2.7	2.7	2.7	5.5
XP_027840435.1	XP_027840435.1	XP_027840435.1 uncharacterized protein LOC114122079 [Aphis gossypii]	1	2	2	2	0	0	0	2	2	2	0	0	0	0	0	0	2	2	2	0	0	0	0	0	0	2	2	2	0	0	0	14.1	14.1	14.1	22.507	198	198	0	27.961	0	0	0	14.1	14.1	14.1	0	0
XP_027840456.1;XP_027840455.1;XP_027840454.1;XP_027840453.1;XP_027840457.1;XP_027840439.1;XP_027842873.1	XP_027840456.1;XP_027840455.1;XP_027840454.1;XP_027840453.1;XP_027840457.1;XP_027840439.1;XP_027842873.1	XP_027840456.1 heat shock 70 kDa protein cognate 4 isoform X4 [Aphis gossypii];XP_027840455.1 heat shock 70 kDa protein cognate 4 isoform X3 [Aphis gossypii];XP_027840454.1 heat shock 70 kDa protein cognate 4 isoform X2 [Aphis gossypii];XP_027840453.1 heat	7	2	1	1	1	1	1	1	0	1	1	2	1	0	0	0	0	0	0	0	1	0	0	0	0	0	0	0	0	1	0	4.4	2.7	2.7	69.719	634	634;634;653;653;672;538;659	0	8.9697	1.7	1.7	1.7	1.7	0	1.7	1.7	4.4
XP_027840500.1	XP_027840500.1	XP_027840500.1 elongation factor 1-alpha [Aphis gossypii]	1	2	2	2	1	1	1	1	1	1	2	1	1	1	1	1	1	1	1	2	1	1	1	1	1	1	1	1	2	1	1	4.5	4.5	4.5	50.28	462	462	0	15.344	2.4	2.4	2.4	2.4	2.4	2.4	4.5	2.4
XP_027840979.1	XP_027840979.1	XP_027840979.1 transcription-associated protein 1-like [Aphis gossypii]	1	1	1	1	1	0	1	0	0	0	1	1	1	1	0	1	0	0	0	1	1	1	1	0	1	0	0	0	1	1	1	0.3	0.3	0.3	424.2	3626	3626	0	8.418	0.3	0	0.3	0	0	0	0.3	0.3
XP_027841160.1	XP_027841160.1	XP_027841160.1 60S ribosomal protein L12 [Aphis gossypii]	1	2	2	2	0	0	0	0	0	0	0	0	2	0	0	0	0	0	0	0	0	2	0	0	0	0	0	0	0	0	2	21.2	21.2	21.2	17.607	165	165	0	17.409	0	0	0	0	0	0	0	0
XP_027841347.1	XP_027841347.1	XP_027841347.1 endochitinase [Aphis gossypii]	1	1	1	1	0	0	0	1	1	1	0	0	0	0	0	0	1	1	1	0	0	0	0	0	0	1	1	1	0	0	0	2	2	2	57.982	511	511	0	6.2739	0	0	0	2	2	2	0	0
XP_027841833.1	XP_027841833.1	XP_027841833.1 stress response protein NST1-like [Aphis gossypii]	1	1	1	1	0	0	0	0	0	0	1	1	1	0	0	0	0	0	0	1	1	1	0	0	0	0	0	0	1	1	1	7	7	7	23.635	200	200	0	19.944	0	0	0	0	0	0	7	7
XP_027841834.1	XP_027841834.1	XP_027841834.1 uncharacterized protein LOC114123156 [Aphis gossypii]	1	1	1	1	0	0	0	0	0	0	1	1	1	0	0	0	0	0	0	1	1	1	0	0	0	0	0	0	1	1	1	6.9	6.9	6.9	17.719	160	160	0	7.4132	0	0	0	0	0	0	6.9	6.9
XP_027842036.1	XP_027842036.1	XP_027842036.1 uncharacterized protein LOC114123311 [Aphis gossypii]	1	1	1	1	0	0	0	1	1	0	0	0	0	0	0	0	1	1	0	0	0	0	0	0	0	1	1	0	0	0	0	8.5	8.5	8.5	27.595	236	236	0	6.03	0	0	0	8.5	8.5	0	0	0
XP_027842125.1	XP_027842125.1	XP_027842125.1 histone H2B-like [Aphis gossypii]	1	1	1	1	0	0	0	0	0	0	1	1	1	0	0	0	0	0	0	1	1	1	0	0	0	0	0	0	1	1	1	8.7	8.7	8.7	13.993	126	126	0	8.1241	0	0	0	0	0	0	8.7	8.7
XP_027842183.1	XP_027842183.1	XP_027842183.1 uncharacterized protein LOC114123423 [Aphis gossypii]	1	2	2	2	0	0	1	1	0	0	0	0	0	0	0	1	1	0	0	0	0	0	0	0	1	1	0	0	0	0	0	2	2	2	210.49	1851	1851	0	10.412	0	0	1.5	0.5	0	0	0	0
XP_027842325.1	XP_027842325.1	XP_027842325.1 otolith matrix protein OMM-64-like [Aphis gossypii]	1	2	2	2	0	0	0	1	0	1	0	0	0	0	0	0	1	0	1	0	0	0	0	0	0	1	0	1	0	0	0	5.8	5.8	5.8	32.46	292	292	0	15.139	0	0	0	5.5	0	5.8	0	0
XP_027842536.1	XP_027842536.1	XP_027842536.1 40S ribosomal protein S5 [Aphis gossypii]	1	1	1	1	0	0	0	0	0	0	1	1	1	0	0	0	0	0	0	1	1	1	0	0	0	0	0	0	1	1	1	6.9	6.9	6.9	24.061	216	216	0	9.7758	0	0	0	0	0	0	6.9	6.9
XP_027842961.1	XP_027842961.1	XP_027842961.1 structural maintenance of chromosomes protein 1A [Aphis gossypii]	1	1	1	1	0	0	0	0	1	0	0	0	0	0	0	0	0	1	0	0	0	0	0	0	0	0	1	0	0	0	0	1	1	1	143.33	1239	1239	0	6.9306	0	0	0	0	1	0	0	0
XP_027843244.1	XP_027843244.1	XP_027843244.1 protein KIAA0100 [Aphis gossypii]	1	1	1	1	0	0	0	1	1	0	0	0	0	0	0	0	1	1	0	0	0	0	0	0	0	1	1	0	0	0	0	0.4	0.4	0.4	252.8	2204	2204	0	6.3926	0	0	0	0.4	0.4	0	0	0
XP_027843387.1	XP_027843387.1	XP_027843387.1 succinate--CoA ligase [ADP/GDP-forming] subunit alpha, mitochondrial [Aphis gossypii]	1	1	1	1	1	1	1	0	0	1	1	1	1	1	1	1	0	0	1	1	1	1	1	1	1	0	0	1	1	1	1	3.1	3.1	3.1	41.138	385	385	0	14.452	3.1	3.1	3.1	0	0	3.1	3.1	3.1
XP_027843563.1	XP_027843563.1	XP_027843563.1 uncharacterized protein LOC114124500 [Aphis gossypii]	1	1	1	1	0	1	1	1	1	0	0	0	0	0	1	1	1	1	0	0	0	0	0	1	1	1	1	0	0	0	0	5.1	5.1	5.1	28.937	257	257	0	6.3147	0	5.1	5.1	5.1	5.1	0	0	0
XP_027844043.1	XP_027844043.1	XP_027844043.1 uncharacterized protein PF11_0213-like [Aphis gossypii]	1	7	7	7	0	0	0	6	5	3	0	0	0	0	0	0	6	5	3	0	0	0	0	0	0	6	5	3	0	0	0	14.7	14.7	14.7	73.939	653	653	0	116.84	0	0	0	12.7	10.4	5.7	0	0
XP_027844044.1;XP_027844057.1;XP_027844045.1	XP_027844044.1;XP_027844057.1;XP_027844045.1	XP_027844044.1 uncharacterized protein LOC114124821 isoform X1 [Aphis gossypii];XP_027844057.1 Golgi-associated plant pathogenesis-related protein 1-like [Aphis gossypii];XP_027844045.1 uncharacterized protein LOC114124821 isoform X2 [Aphis gossypii]	3	2	2	2	0	0	0	2	1	2	0	0	0	0	0	0	2	1	2	0	0	0	0	0	0	2	1	2	0	0	0	4.3	4.3	4.3	60.713	532	532;183;469	0	13.522	0	0	0	4.3	1.7	4.3	0	0
XP_027844794.1	XP_027844794.1	XP_027844794.1 eukaryotic translation initiation factor 3 subunit A-like [Aphis gossypii]	1	8	8	8	2	2	2	4	5	4	1	2	3	2	2	2	4	5	4	1	2	3	2	2	2	4	5	4	1	2	3	19.4	19.4	19.4	44.095	382	382	0	81.598	3.1	7.1	7.1	10.5	14.4	12	3.1	3.1
XP_027844798.1;XP_027844784.1	XP_027844798.1;XP_027844784.1	XP_027844798.1 uncharacterized protein LOC114125381 [Aphis gossypii];XP_027844784.1 uncharacterized protein LOC114125367 [Aphis gossypii]	2	6	6	6	2	0	0	4	3	5	1	0	1	2	0	0	4	3	5	1	0	1	2	0	0	4	3	5	1	0	1	22.7	22.7	22.7	42.489	375	375;375	0	98.598	6.7	0	0	17.6	14.4	19.5	3.2	0
XP_027845077.1;XP_027844994.1;XP_027844916.1	XP_027845077.1;XP_027844994.1;XP_027844916.1	XP_027845077.1 uncharacterized protein LOC114125438 isoform X2 [Aphis gossypii];XP_027844994.1 uncharacterized protein LOC114125438 isoform X1 [Aphis gossypii];XP_027844916.1 uncharacterized protein LOC114125438 isoform X1 [Aphis gossypii]	3	1	1	1	0	0	0	0	0	0	0	1	0	0	0	0	0	0	0	0	1	0	0	0	0	0	0	0	0	1	0	0.7	0.7	0.7	280.73	2493	2493;2514;2514	0	6.1577	0	0	0	0	0	0	0	0.7
XP_027844950.1;XP_027844949.1	XP_027844950.1;XP_027844949.1	XP_027844950.1 histone-lysine N-methyltransferase SETD1B-A [Aphis gossypii];XP_027844949.1 histone-lysine N-methyltransferase SETD1B-A [Aphis gossypii]	2	1	1	1	1	1	1	0	0	0	1	0	0	1	1	1	0	0	0	1	0	0	1	1	1	0	0	0	1	0	0	1	1	1	151.5	1326	1326;1326	0	6.2686	1	1	1	0	0	0	1	0
XP_027845399.1;XP_027845398.1;XP_027845397.1;XP_027845396.1	XP_027845399.1;XP_027845398.1;XP_027845397.1;XP_027845396.1	XP_027845399.1 apoptosis-stimulating of p53 protein 1 isoform X3 [Aphis gossypii];XP_027845398.1 apoptosis-stimulating of p53 protein 1 isoform X3 [Aphis gossypii];XP_027845397.1 apoptosis-stimulating of p53 protein 1 isoform X2 [Aphis gossypii];XP_0278453	4	1	1	1	0	0	0	1	1	1	0	0	0	0	0	0	1	1	1	0	0	0	0	0	0	1	1	1	0	0	0	0.7	0.7	0.7	127.84	1157	1157;1157;1174;1185	0	15.971	0	0	0	0.7	0.7	0.7	0	0
XP_027845841.1	XP_027845841.1	XP_027845841.1 60S ribosomal protein L11-like [Aphis gossypii]	1	1	1	1	0	0	0	0	0	0	0	1	1	0	0	0	0	0	0	0	1	1	0	0	0	0	0	0	0	1	1	7.4	7.4	7.4	21.721	189	189	0	6.8834	0	0	0	0	0	0	0	7.4
XP_027846037.1	XP_027846037.1	XP_027846037.1 dynein beta chain, ciliary [Aphis gossypii]	1	2	2	2	0	0	0	1	0	0	1	0	0	0	0	0	1	0	0	1	0	0	0	0	0	1	0	0	1	0	0	1.8	1.8	1.8	325.29	2857	2857	0	10.563	0	0	0	0.4	0	0	1.4	0
XP_027846496.1	XP_027846496.1	XP_027846496.1 uncharacterized protein LOC114126694 [Aphis gossypii]	1	5	5	5	0	0	0	1	3	4	0	0	0	0	0	0	1	3	4	0	0	0	0	0	0	1	3	4	0	0	0	17.3	17.3	17.3	46.631	387	387	0	45.75	0	0	0	3.6	11.1	13.2	0	0
XP_027846500.1	XP_027846500.1	XP_027846500.1 uncharacterized protein LOC114126699 [Aphis gossypii]	1	5	5	5	0	0	0	2	4	5	0	0	0	0	0	0	2	4	5	0	0	0	0	0	0	2	4	5	0	0	0	16.7	16.7	16.7	40.704	347	347	0	49.829	0	0	0	6.9	14.4	16.7	0	0
XP_027846503.1	XP_027846503.1	XP_027846503.1 uncharacterized protein LOC114126702 [Aphis gossypii]	1	1	1	1	0	0	0	1	1	1	0	0	0	0	0	0	1	1	1	0	0	0	0	0	0	1	1	1	0	0	0	4.2	4.2	4.2	46.027	379	379	0	27.978	0	0	0	4.2	4.2	4.2	0	0
XP_027846723.1	XP_027846723.1	XP_027846723.1 uncharacterized protein LOC114126879 [Aphis gossypii]	1	5	5	5	0	0	0	4	2	5	0	0	0	0	0	0	4	2	5	0	0	0	0	0	0	4	2	5	0	0	0	15.8	15.8	15.8	39.066	348	348	0	63.618	0	0	0	15.8	5.7	15.8	0	0
XP_027847304.1	XP_027847304.1	XP_027847304.1 probable RNA-binding protein 46 [Aphis gossypii]	1	1	1	1	0	0	0	0	0	0	1	1	0	0	0	0	0	0	0	1	1	0	0	0	0	0	0	0	1	1	0	3	3	3	46.476	403	403	1	-2	0	0	0	0	0	0	3	3
XP_027848060.1	XP_027848060.1	XP_027848060.1 uncharacterized protein LOC114127900 [Aphis gossypii]	1	1	1	1	1	0	1	0	0	0	1	1	0	1	0	1	0	0	0	1	1	0	1	0	1	0	0	0	1	1	0	4.9	4.9	4.9	20.857	182	182	0	6.3884	4.9	0	4.9	0	0	0	4.9	4.9
XP_027848178.1	XP_027848178.1	XP_027848178.1 calreticulin [Aphis gossypii]	1	1	1	1	0	0	0	0	0	0	1	1	1	0	0	0	0	0	0	1	1	1	0	0	0	0	0	0	1	1	1	3.2	3.2	3.2	46.963	407	407	0	7.6312	0	0	0	0	0	0	3.2	3.2
XP_027848216.1	XP_027848216.1	XP_027848216.1 uncharacterized protein LOC114128009 [Aphis gossypii]	1	5	5	5	0	0	0	3	3	4	0	0	1	0	0	0	3	3	4	0	0	1	0	0	0	3	3	4	0	0	1	26.1	26.1	26.1	25.127	222	222	0	56.285	0	0	0	18	18	22.5	0	0
XP_027848310.1	XP_027848310.1	XP_027848310.1 multiple inositol polyphosphate phosphatase 1-like [Aphis gossypii]	1	3	3	3	0	0	0	2	2	2	0	1	0	0	0	0	2	2	2	0	1	0	0	0	0	2	2	2	0	1	0	6.2	6.2	6.2	57.554	497	497	0	23.298	0	0	0	4	4	4.2	0	2
XP_027848427.1	XP_027848427.1	XP_027848427.1 putative histone-lysine N-methyltransferase 1, partial [Aphis gossypii]	1	14	14	14	1	0	0	12	11	10	0	0	0	1	0	0	12	11	10	0	0	0	1	0	0	12	11	10	0	0	0	14.9	14.9	14.9	140.47	1228	1228	0	323.31	1.5	0	0	12.7	12.2	11.4	0	0
XP_027848476.1;XP_027848475.1	XP_027848476.1;XP_027848475.1	XP_027848476.1 activating signal cointegrator 1 complex subunit 3 [Aphis gossypii];XP_027848475.1 activating signal cointegrator 1 complex subunit 3 [Aphis gossypii]	2	1	1	1	0	1	0	0	0	0	0	1	0	0	1	0	0	0	0	0	1	0	0	1	0	0	0	0	0	1	0	0.6	0.6	0.6	247.19	2157	2157;2157	0	6.0318	0	0.6	0	0	0	0	0	0.6
XP_027848537.1;XP_027848536.1	XP_027848537.1;XP_027848536.1	XP_027848537.1 alanine--glyoxylate aminotransferase 2-like isoform X2 [Aphis gossypii];XP_027848536.1 alanine--glyoxylate aminotransferase 2-like isoform X1 [Aphis gossypii]	2	1	1	1	0	0	1	0	0	0	1	0	1	0	0	1	0	0	0	1	0	1	0	0	1	0	0	0	1	0	1	2.6	2.6	2.6	42.075	379	379;453	0	7.2313	0	0	2.6	0	0	0	2.6	0
XP_027849254.1	XP_027849254.1	XP_027849254.1 uncharacterized protein LOC114128856 [Aphis gossypii]	1	3	3	3	0	0	0	3	2	2	1	0	0	0	0	0	3	2	2	1	0	0	0	0	0	3	2	2	1	0	0	18	18	18	30.661	294	294	0	27.923	0	0	0	18	9.5	9.5	5.1	0
XP_027849281.1;XP_027849274.1;XP_027849266.1	XP_027849281.1;XP_027849274.1;XP_027849266.1	XP_027849281.1 uncharacterized PE-PGRS family protein PE_PGRS20-like isoform X3 [Aphis gossypii];XP_027849274.1 glycine-rich cell wall structural protein 1.8-like isoform X2 [Aphis gossypii];XP_027849266.1 uncharacterized PE-PGRS family protein PE_PGRS54-l	3	1	1	1	0	0	0	0	1	0	0	0	0	0	0	0	0	1	0	0	0	0	0	0	0	0	1	0	0	0	0	2.3	2.3	2.3	76.358	730	730;812;869	0	6.3408	0	0	0	0	2.3	0	0	0
XP_027849454.1	XP_027849454.1	XP_027849454.1 uncharacterized protein LOC114129031 [Aphis gossypii]	1	1	1	1	0	0	0	1	1	1	0	0	0	0	0	0	1	1	1	0	0	0	0	0	0	1	1	1	0	0	0	8.1	8.1	8.1	17.01	149	149	0	6.3559	0	0	0	8.1	8.1	8.1	0	0
XP_027849470.1	XP_027849470.1	XP_027849470.1 trichohyalin-like [Aphis gossypii]	1	1	1	1	0	0	0	1	0	0	0	0	0	0	0	0	1	0	0	0	0	0	0	0	0	1	0	0	0	0	0	5.1	5.1	5.1	44.321	371	371	0	17.14	0	0	0	5.1	0	0	0	0
XP_027849472.1	XP_027849472.1	XP_027849472.1 histone-lysine N-methyltransferase, H3 lysine-79 specific-like [Aphis gossypii]	1	8	8	8	0	0	1	8	6	6	0	0	0	0	0	1	8	6	6	0	0	0	0	0	1	8	6	6	0	0	0	19.9	19.9	19.9	32.843	276	276	0	172.93	0	0	5.4	19.9	16.7	16.7	0	0
XP_027849563.1;XP_027849560.1;XP_027849562.1;XP_027849561.1	XP_027849563.1;XP_027849560.1;XP_027849562.1;XP_027849561.1	XP_027849563.1 uncharacterized protein LOC114129126 isoform X4 [Aphis gossypii];XP_027849560.1 uncharacterized protein LOC114129126 isoform X1 [Aphis gossypii];XP_027849562.1 uncharacterized protein LOC114129126 isoform X3 [Aphis gossypii];XP_027849561.1 u	4	3	3	3	0	0	0	1	2	2	0	0	0	0	0	0	1	2	2	0	0	0	0	0	0	1	2	2	0	0	0	11.8	11.8	11.8	37.218	306	306;366;345;353	0	17.406	0	0	0	3.3	6.5	8.5	0	0
XP_027849877.1	XP_027849877.1	XP_027849877.1 glutamine synthetase-like [Aphis gossypii]	1	1	1	1	0	0	0	0	0	0	1	1	1	0	0	0	0	0	0	1	1	1	0	0	0	0	0	0	1	1	1	3.2	3.2	3.2	41.498	370	370	0	7.1545	0	0	0	0	0	0	3.2	3.2
XP_027850173.1;XP_027850172.1;XP_027850171.1;XP_027850169.1;XP_027850174.1	XP_027850173.1;XP_027850172.1;XP_027850171.1;XP_027850169.1;XP_027850174.1	XP_027850173.1 sporozoite surface protein 2-like isoform X4 [Aphis gossypii];XP_027850172.1 high mobility group nucleosome-binding domain-containing protein 5-like isoform X3 [Aphis gossypii];XP_027850171.1 high mobility group nucleosome-binding domain-con	5	7	7	7	2	0	1	4	5	4	0	0	0	2	0	1	4	5	4	0	0	0	2	0	1	4	5	4	0	0	0	20.8	20.8	20.8	52.617	467	467;530;531;531;466	0	66.414	5.6	0	3	12.6	17.8	10.7	0	0
XP_027850219.1	XP_027850219.1	XP_027850219.1 isovaleryl-CoA dehydrogenase, mitochondrial [Aphis gossypii]	1	1	1	1	0	0	0	0	0	0	1	1	1	0	0	0	0	0	0	1	1	1	0	0	0	0	0	0	1	1	1	2.9	2.9	2.9	46.201	418	418	0	27.598	0	0	0	0	0	0	2.9	2.9
XP_027850379.1	XP_027850379.1	XP_027850379.1 uncharacterized protein LOC114129750 [Aphis gossypii]	1	1	1	1	0	0	0	1	1	1	0	0	0	0	0	0	1	1	1	0	0	0	0	0	0	1	1	1	0	0	0	5.6	5.6	5.6	61.305	567	567	0	42.561	0	0	0	5.6	5.6	5.6	0	0
XP_027850491.1	XP_027850491.1	XP_027850491.1 uncharacterized protein LOC114129844 [Aphis gossypii]	1	4	4	4	1	1	1	4	4	3	1	1	1	1	1	1	4	4	3	1	1	1	1	1	1	4	4	3	1	1	1	24.6	24.6	24.6	20.999	187	187	0	40.577	7.5	7.5	7.5	24.6	24.6	17.6	7.5	7.5
XP_027851246.1	XP_027851246.1	XP_027851246.1 LOW QUALITY PROTEIN: uncharacterized protein DDB_G0283357-like [Aphis gossypii]	1	8	8	8	0	0	0	4	5	4	0	0	0	0	0	0	4	5	4	0	0	0	0	0	0	4	5	4	0	0	0	10.7	10.7	10.7	171.49	1537	1537	0	90.59	0	0	0	4.4	7.3	4.2	0	0
XP_027851459.1	XP_027851459.1	XP_027851459.1 60S ribosomal protein L30 [Aphis gossypii]	1	1	1	1	0	0	0	0	0	0	0	0	1	0	0	0	0	0	0	0	0	1	0	0	0	0	0	0	0	0	1	13.9	13.9	13.9	12.512	115	115	0	8.5959	0	0	0	0	0	0	0	0
XP_027851813.1;XP_027851812.1;XP_027851811.1	XP_027851813.1;XP_027851812.1;XP_027851811.1	XP_027851813.1 E3 ubiquitin-protein ligase MYLIP-like isoform X2 [Aphis gossypii];XP_027851812.1 E3 ubiquitin-protein ligase MYLIP-like isoform X1 [Aphis gossypii];XP_027851811.1 E3 ubiquitin-protein ligase MYLIP-like isoform X1 [Aphis gossypii]	3	1	1	1	0	0	0	1	1	1	0	0	0	0	0	0	1	1	1	0	0	0	0	0	0	1	1	1	0	0	0	2.7	2.7	2.7	49.646	439	439;439;439	0	6.0931	0	0	0	2.7	2.7	2.7	0	0
XP_027852041.1	XP_027852041.1	XP_027852041.1 uncharacterized protein LOC114131096 [Aphis gossypii]	1	1	1	1	0	0	0	0	0	0	0	1	1	0	0	0	0	0	0	0	1	1	0	0	0	0	0	0	0	1	1	4.6	4.6	4.6	42.427	370	370	0	12.678	0	0	0	0	0	0	0	4.6
XP_027852089.1	XP_027852089.1	XP_027852089.1 60S ribosomal protein L10a [Aphis gossypii]	1	1	1	1	0	0	0	0	0	0	0	0	1	0	0	0	0	0	0	0	0	1	0	0	0	0	0	0	0	0	1	6.9	6.9	6.9	24.722	217	217	0	8.5298	0	0	0	0	0	0	0	0
XP_027852578.1;XP_027852577.1	XP_027852578.1;XP_027852577.1	XP_027852578.1 uncharacterized protein LOC114131530 [Aphis gossypii];XP_027852577.1 uncharacterized protein LOC114131530 [Aphis gossypii]	2	1	1	1	0	0	0	0	0	1	0	0	0	0	0	0	0	0	1	0	0	0	0	0	0	0	0	1	0	0	0	11.4	11.4	11.4	15.756	132	132;132	0	8.7938	0	0	0	0	0	11.4	0	0
XP_027852579.1	XP_027852579.1	XP_027852579.1 uncharacterized protein LOC114131531 [Aphis gossypii]	1	1	1	1	0	0	0	0	1	1	0	0	0	0	0	0	0	1	1	0	0	0	0	0	0	0	1	1	0	0	0	8.7	8.7	8.7	23.586	196	196	0	12.27	0	0	0	0	8.7	8.7	0	0
XP_027853090.1	XP_027853090.1	XP_027853090.1 uncharacterized protein LOC114131937 [Aphis gossypii]	1	2	2	2	0	0	0	2	2	2	0	0	0	0	0	0	2	2	2	0	0	0	0	0	0	2	2	2	0	0	0	10.8	10.8	10.8	23.317	204	204	0	16.59	0	0	0	10.8	10.8	10.8	0	0
XP_027853980.1;XP_027853979.1	XP_027853980.1;XP_027853979.1	XP_027853980.1 septin-7 isoform X2 [Aphis gossypii];XP_027853979.1 septin-7 isoform X1 [Aphis gossypii]	2	1	1	1	1	1	1	0	0	0	0	1	0	1	1	1	0	0	0	0	1	0	1	1	1	0	0	0	0	1	0	2.3	2.3	2.3	59.269	519	519;534	0	11.148	2.3	2.3	2.3	0	0	0	0	2.3
XP_027854445.1	XP_027854445.1	XP_027854445.1 trifunctional purine biosynthetic protein adenosine-3 [Aphis gossypii]	1	2	2	2	0	0	0	2	1	2	0	0	0	0	0	0	2	1	2	0	0	0	0	0	0	2	1	2	0	0	0	2.8	2.8	2.8	109.74	1010	1010	0	15.28	0	0	0	2.8	0.7	2.8	0	0
[truncated: 47 more columns]
