# Supplementary material for: A Method for Identification of Biotype-Specific Salivary Effector Candidates of Aphid
Source: Insects. 2023 Sep 13;14(9):760. doi: 10.3390/insects14090760 (PMC10532216; doi:10.3390/insects14090760)
Supplement: Supplementary file 1 [file insects-14-00760-s001.zip › Table S5 Biotype-specific protein groups identified by label-free quantification.xlsx]

## Sheet: Differential protein groups 18
Protein IDs	Majority protein IDs	Fasta headers	Number of proteins	Peptides	Razor + unique peptides	Unique peptides	Peptides CU-1	Peptides CU-2	Peptides CU-3	Peptides Mian-1	Peptides Mian-2	Peptides Mian-3	Unique peptides CU-1	Unique peptides CU-2	Unique peptides CU-3	Unique peptides MA-1	Unique peptides MA-2	Unique peptides MA-3	Sequence coverage [%]	Unique + razor sequence coverage [%]	Unique sequence coverage [%]	Mol. weight [kDa]	Sequence length	Q-value	Score	LFQ intensity CU-1	LFQ intensity CU-2	LFQ intensity CU-3	LFQ intensity MA-1	LFQ intensity MA-2	LFQ intensity MA-3	Average CU	Average MA	FC CU/MA	P value
XP_027843984.1	XP_027843984.1;XP_027842129.1	XP_027843984.1 histone H4 [Aphis gossypii];XP_027842129.1 histone H4 [Aphis gossypii]	2	6	6	6	2	2	1	4	5	5	2	2	1	4	5	5	51.5	51.5	51.5	11.381	103	0	163.28	4730100	5888600		65237000	91901000	91843000	5309350	8.29937e+07	0.063973	0.00657792
XP_027839259.1	XP_027839259.1	XP_027839259.1 uncharacterized protein LOC114121223 [Aphis gossypii]	1	11	11	11	5	3	6	5	5	5	5	3	6	5	5	5	14.2	14.2	14.2	108.22	952	0	224.73	6860500	7564800	7780800	21217000	20629000	22130000	7.40203e+06	2.13253e+07	0.3471	1.13526e-05
XP_027842596.1	XP_027842596.1	XP_027842596.1 uncharacterized protein LOC114123729 [Aphis gossypii]	1	7	7	7	6	6	7	2	3	2	6	6	7	2	3	2	60.9	60.9	60.9	17.781	156	0	176.45	1356500000	1344500000	1312600000	312150000	477200000	388530000	1.33787e+09	3.92627e+08	3.40748	4.41554e-05
XP_027837970.1	XP_027837970.1	XP_027837970.1 LOW QUALITY PROTEIN: apolipophorins-like [Aphis gossypii]	1	93	93	93	82	75	74	31	34	34	82	75	74	31	34	34	42.5	42.5	42.5	314.58	2756	0	323.31	1290000000	1358600000	1333400000	338130000	341900000	350960000	1.32733e+09	3.43663e+08	3.86231	1.1051e-06
XP_027854504.1	XP_027854504.1	XP_027854504.1 LOW QUALITY PROTEIN: uncharacterized protein LOC114133079 [Aphis gossypii]	1	49	49	49	42	43	44	27	28	26	42	43	44	27	28	26	54.8	54.8	54.8	127.55	1145	0	323.31	1792100000	1924400000	1957600000	479770000	471720000	477760000	1.89137e+09	4.76417e+08	3.96998	9.73576e-06
XP_027853010.1	XP_027853010.1	XP_027853010.1 glucose dehydrogenase [FAD, quinone]-like [Aphis gossypii]	1	27	27	27	23	24	22	9	11	12	23	24	22	9	11	12	43.6	43.6	43.6	79.055	713	0	323.31	828940000	838530000	740810000	177930000	182440000	186080000	802760000	182150000	4.40714	3.76298e-05
XP_027854023.1	XP_027854023.1	XP_027854023.1 putative uncharacterized protein DDB_G0267840 [Aphis gossypii]	1	10	10	10	8	9	8	4	5	5	8	9	8	4	5	5	44.9	44.9	44.9	36.115	325	0	323.31	207120000	197910000	195300000	33469000	39655000	34148000	200110000	3.57573e+07	5.59633	2.28098e-06
XP_027854022.1	XP_027854022.1;XP_027854021.1;XP_027854020.1;XP_027854019.1;XP_027854017.1;XP_027854016.1;XP_027854015.1;XP_027854014.1;XP_027854013.1;XP_027854012.1;XP_027854018.1	XP_027854022.1 protein starmaker-like isoform X11 [Aphis gossypii];XP_027854021.1 protein starmaker-like isoform X10 [Aphis gossypii];XP_027854020.1 dentin sialophosphoprotein-like isoform X9 [Aphis gossypii];XP_027854019.1 dentin sialophosphoprotein-like	11	9	9	9	8	7	8	3	2	2	8	7	8	3	2	2	14.5	14.5	14.5	58.557	510	0	211.66	128830000	114310000	138530000	25129000	17016000	14498000	1.27223e+08	18881000	6.73817	0.00015066
XP_027853250.1	XP_027853250.1	XP_027853250.1 peroxidase-like [Aphis gossypii]	1	17	17	17	16	15	14	5	5	4	16	15	14	5	5	4	34.5	34.5	34.5	70.585	623	0	323.01	197430000	224090000	210470000	27899000	31024000	26991000	2.10663e+08	28638000	7.35608	1.99139e-05
XP_027837168.1	XP_027837168.1	XP_027837168.1 uncharacterized protein LOC114119699 [Aphis gossypii]	1	10	10	10	9	9	8	2	2	2	9	9	8	2	2	2	47.4	47.4	47.4	30.526	274	0	204	137710000	149790000	161700000	17283000	14175000	11809000	1.49733e+08	1.44223e+07	10.382	4.47713e-05
XP_027843668.1	XP_027843668.1	XP_027843668.1 uncharacterized protein LOC114124575 [Aphis gossypii]	1	30	30	30	21	21	21	24	24	25	21	21	21	24	24	25	52.5	52.5	52.5	134.46	1213	0	323.31	6493000000	6251800000	6154600000	6414300000	5976000000	6475200000	6299800000	6288500000	1.0018	0.954631
XP_027853848.1	XP_027853848.1;XP_027852649.1;XP_027841315.1	XP_027853848.1 actin-5C [Aphis gossypii];XP_027852649.1 actin-42A-like [Aphis gossypii];XP_027841315.1 actin, muscle [Aphis gossypii]	3	12	12	3	7	7	7	3	5	3	3	3	2	2	2	2	36.2	36.2	12.5	41.807	376	0	304.98	31451000	30050000	27154000	44346000	55397000	57304000	2.95517e+07	52349000	0.564513	0.00574561
XP_027844795.1	XP_027844795.1	XP_027844795.1 uncharacterized protein LOC114125378 [Aphis gossypii]	1	7	7	7	6	7	7	4	3	3	6	7	7	4	3	3	26.3	26.3	26.3	40.737	358	0	156.57	34891000	38043000	38317000	25748000	28576000	22620000	3.70837e+07	25648000	1.44587	0.00498512
XP_027844801.1	XP_027844801.1	XP_027844801.1 uncharacterized protein LOC114125384 [Aphis gossypii]	1	8	8	8	6	5	5	3	3	3	6	5	5	3	3	3	27.2	27.2	27.2	41.038	353	0	68.973	27106000	19473000	25837000	13575000	15865000	17744000	2.41387e+07	15728000	1.53476	0.0337838
XP_027842597.1	XP_027842597.1	XP_027842597.1 uncharacterized protein LOC114123730 [Aphis gossypii]	1	7	7	7	6	7	6	5	4	4	6	7	6	5	4	4	52.8	52.8	52.8	16.106	142	0	149.02	1207500000	1329400000	1159300000	720530000	657620000	796130000	1.23207e+09	724760000	1.69997	0.00141544
XP_027852804.1	XP_027852804.1;XP_027846164.1;XP_027854514.1;XP_027854502.1;XP_027853233.1;XP_027843240.1;XP_027836957.1;XP_027840464.1	XP_027852804.1 heat shock protein 68-like [Aphis gossypii];XP_027846164.1 heat shock protein 70 B2-like [Aphis gossypii];XP_027854514.1 heat shock protein 70 A1-like [Aphis gossypii];XP_027854502.1 heat shock protein 70 A1-like [Aphis gossypii];XP_02785323	8	3	3	2	2	1	2	2	2	2	1	1	1	1	1	1	6.3	6.3	4.5	69.658	639	0	28.722	23052000	25048000	19126000	38232000	30711000	21294000	2.24087e+07	30079000	0.744994	0.214178
XP_027850869.1	XP_027850869.1	XP_027850869.1 late cornified envelope-like proline-rich protein 1 [Aphis gossypii]	1	3	3	3	3	3	3	2	2	2	3	3	3	2	2	2	13.1	13.1	13.1	18.121	168	0	25.104	616360000	396690000	616690000	455670000	428480000	433800000	5.43247e+08	4.39317e+08	1.23657	0.231558
XP_027851238.1	XP_027851238.1	XP_027851238.1 uncharacterized protein LOC114130459 [Aphis gossypii]	1	7	7	7	6	6	5	1	2	2	6	6	5	1	2	2	28	28	28	28.321	257	0	111.78	77047000	28427000	28135000		15086000	11858000	4.45363e+07	13472000	3.30584	0.235974

## Sheet: Unique protein groups 26
Protein IDs	Majority protein IDs	Fasta headers	Number of proteins	Peptides	Razor + unique peptides	Unique peptides	Peptides CU-1	Peptides CU-2	Peptides CU-3	Peptides MA-1	Peptides MA-2	Peptides MA-3	Unique peptides CU-1	Unique peptides CU-2	Unique peptides CU-3	Unique peptides MA-1	Unique peptides MA-2	Unique peptides MA-3	Sequence coverage [%]	Unique + razor sequence coverage [%]	Unique sequence coverage [%]	Mol. weight [kDa]	Sequence length	Q-value	Score	LFQ intensity CU-1	LFQ intensity CU-2	LFQ intensity CU-3	LFQ intensity MA-1	LFQ intensity MA-2	LFQ intensity MA-3	unique CU	unique MA
XP_027842050.1	XP_027842050.1	XP_027842050.1 LOW QUALITY PROTEIN: probable cyclin-dependent serine/threonine-protein kinase DDB_G0292550 [Aphis gossypii]	1	22	22	22	18	18	18	1	1	0	18	18	18	1	1	0	30.9	30.9	30.9	102.92	941	0	323.31	215740000	219260000	214850000				*
XP_027849516.1	XP_027849516.1;XP_027849510.1	XP_027849516.1 NAD-dependent protein deacetylase HST1-like [Aphis gossypii];XP_027849510.1 protein PFC0760c-like [Aphis gossypii]	2	11	11	11	8	10	11	0	0	1	8	10	11	0	0	1	31.2	31.2	31.2	56.455	506	0	237.69	43493000	55051000	64050000				*
XP_027842099.1	XP_027842099.1	XP_027842099.1 uncharacterized protein LOC114123363 [Aphis gossypii]	1	3	3	3	2	2	2	0	1	1	2	2	2	0	1	1	18.9	18.9	18.9	15.189	127	0	40.788	8502400	17110000	17995000				*
XP_027836370.1	XP_027836370.1	XP_027836370.1 uncharacterized protein LOC114119100 [Aphis gossypii]	1	3	3	3	3	3	2	1	1	1	3	3	2	1	1	1	20.9	20.9	20.9	21.815	191	0	54.07	21671000	26576000	23885000				*
XP_027836422.1	XP_027836422.1	XP_027836422.1 uncharacterized protein LOC114119139 [Aphis gossypii]	1	3	3	3	3	3	2	0	0	0	3	3	2	0	0	0	8.3	8.3	8.3	41.988	363	0	17.662	9950300	11149000	12804000				*
XP_027837940.1	XP_027837940.1	XP_027837940.1 putative uncharacterized protein DDB_G0282133, partial [Aphis gossypii]	1	3	3	3	2	2	3	0	0	0	2	2	3	0	0	0	2.9	2.9	2.9	136.81	1203	0	22.998	9877700	10176000	11360000				*
XP_027838687.1	XP_027838687.1	XP_027838687.1 LOW QUALITY PROTEIN: uncharacterized protein LOC114120835 [Aphis gossypii]	1	5	5	5	2	5	4	0	0	0	2	5	4	0	0	0	14.5	14.5	14.5	38.451	332	0	38.024	11845000	13001000	13992000				*
XP_027840435.1	XP_027840435.1	XP_027840435.1 uncharacterized protein LOC114122079 [Aphis gossypii]	1	2	2	2	2	2	2	0	0	0	2	2	2	0	0	0	14.1	14.1	14.1	22.507	198	0	27.961	27516000	28466000	27377000				*
XP_027844043.1	XP_027844043.1	XP_027844043.1 uncharacterized protein PF11_0213-like [Aphis gossypii]	1	7	7	7	6	5	3	0	0	0	6	5	3	0	0	0	14.7	14.7	14.7	73.939	653	0	116.84	10565000	9187700	10275000				*
XP_027844794.1	XP_027844794.1	XP_027844794.1 eukaryotic translation initiation factor 3 subunit A-like [Aphis gossypii]	1	8	8	8	4	5	4	1	2	3	4	5	4	1	2	3	19.4	19.4	19.4	44.095	382	0	81.598	14470000	17689000	17670000				*
XP_027844798.1	XP_027844798.1;XP_027844784.1	XP_027844798.1 uncharacterized protein LOC114125381 [Aphis gossypii];XP_027844784.1 uncharacterized protein LOC114125367 [Aphis gossypii]	2	6	6	6	4	3	5	1	0	1	4	3	5	1	0	1	22.7	22.7	22.7	42.489	375	0	98.598	20767000	26777000	25888000				*
XP_027846500.1	XP_027846500.1	XP_027846500.1 uncharacterized protein LOC114126699 [Aphis gossypii]	1	5	5	5	2	4	5	0	0	0	2	4	5	0	0	0	16.7	16.7	16.7	40.704	347	0	49.829	6084000	6697900	6213600				*
XP_027846723.1	XP_027846723.1	XP_027846723.1 uncharacterized protein LOC114126879 [Aphis gossypii]	1	5	5	5	4	2	5	0	0	0	4	2	5	0	0	0	15.8	15.8	15.8	39.066	348	0	63.618	7542000	7733700	8730000				*
XP_027848216.1	XP_027848216.1	XP_027848216.1 uncharacterized protein LOC114128009 [Aphis gossypii]	1	5	5	5	3	3	4	0	0	1	3	3	4	0	0	1	26.1	26.1	26.1	25.127	222	0	56.285	18998000	20912000	26499000				*
XP_027848427.1	XP_027848427.1	XP_027848427.1 putative histone-lysine N-methyltransferase 1, partial [Aphis gossypii]	1	14	14	14	12	11	10	0	0	0	12	11	10	0	0	0	14.9	14.9	14.9	140.47	1228	0	323.31	37883000	38968000	36325000				*
XP_027849254.1	XP_027849254.1	XP_027849254.1 uncharacterized protein LOC114128856 [Aphis gossypii]	1	3	3	3	3	2	2	1	0	0	3	2	2	1	0	0	18	18	18	30.661	294	0	27.923	2305800	2633400	2884300				*
XP_027849472.1	XP_027849472.1	XP_027849472.1 histone-lysine N-methyltransferase, H3 lysine-79 specific-like [Aphis gossypii]	1	8	8	8	8	6	6	0	0	0	8	6	6	0	0	0	19.9	19.9	19.9	32.843	276	0	172.93	78542000	78563000	73744000				*
XP_027850173.1	XP_027850173.1;XP_027850172.1;XP_027850171.1;XP_027850169.1;XP_027850174.1	XP_027850173.1 sporozoite surface protein 2-like isoform X4 [Aphis gossypii];XP_027850172.1 high mobility group nucleosome-binding domain-containing protein 5-like isoform X3 [Aphis gossypii];XP_027850171.1 high mobility group nucleosome-binding domain-con	5	7	7	7	4	5	4	0	0	0	4	5	4	0	0	0	20.8	20.8	20.8	52.617	467	0	66.414	18485000	20382000	18556000				*
XP_027850491.1	XP_027850491.1	XP_027850491.1 uncharacterized protein LOC114129844 [Aphis gossypii]	1	4	4	4	4	4	3	1	1	1	4	4	3	1	1	1	24.6	24.6	24.6	20.999	187	0	40.577	27691000	28613000	27956000				*
XP_027851246.1	XP_027851246.1	XP_027851246.1 LOW QUALITY PROTEIN: uncharacterized protein DDB_G0283357-like [Aphis gossypii]	1	8	8	8	4	5	4	0	0	0	4	5	4	0	0	0	10.7	10.7	10.7	171.49	1537	0	90.59	8847900	8065200	6549500				*
XP_027853090.1	XP_027853090.1	XP_027853090.1 uncharacterized protein LOC114131937 [Aphis gossypii]	1	2	2	2	2	2	2	0	0	0	2	2	2	0	0	0	10.8	10.8	10.8	23.317	204	0	16.59	2370600	2608800	2513200				*
XP_027844044.1	XP_027844044.1;XP_027844057.1;XP_027844045.1	XP_027844044.1 uncharacterized protein LOC114124821 isoform X1 [Aphis gossypii];XP_027844057.1 Golgi-associated plant pathogenesis-related protein 1-like [Aphis gossypii];XP_027844045.1 uncharacterized protein LOC114124821 isoform X2 [Aphis gossypii]	3	2	2	2	2	1	2	0	0	0	2	1	2	0	0	0	4.3	4.3	4.3	60.713	532	0	13.522	4515800		5992500				*
XP_027848310.1	XP_027848310.1	XP_027848310.1 multiple inositol polyphosphate phosphatase 1-like [Aphis gossypii]	1	3	3	3	2	2	2	0	1	0	2	2	2	0	1	0	6.2	6.2	6.2	57.554	497	0	23.298	5342100	5651500					*
XP_027853511.1	XP_027853511.1	XP_027853511.1 ATP synthase subunit beta, mitochondrial [Aphis gossypii]	1	5	5	5	1	0	0	4	4	4	1	0	0	4	4	4	12.9	12.9	12.9	55.81	521	0	169.21				54972000	68194000	82984000		*
XP_027837426.1	XP_027837426.1	XP_027837426.1 uncharacterized protein LOC114119891 [Aphis gossypii]	1	8	8	8	0	0	0	6	6	5	0	0	0	6	6	5	29.1	29.1	29.1	43.052	378	0	72.688				32305000	26869000	29229000		*
XP_027845346.1	XP_027845346.1;XP_027838345.1	XP_027845346.1 ATP synthase subunit alpha, mitochondrial [Aphis gossypii];XP_027838345.1 ATP synthase subunit alpha, mitochondrial-like [Aphis gossypii]	2	2	2	2	0	0	0	1	1	1	0	0	0	1	1	1	3.6	3.6	3.6	59.795	551	0	15.105				35779000	29103000			*
